# Supplementary material for: Transcriptome and proteome analysis of Salmonella enterica serovar Typhimurium systemic infection of wild type and immune-deficient mice
Source: PLoS One. 2017 Aug 10;12(8):e0181365. doi: 10.1371/journal.pone.0181365 (PMC5552096; doi:10.1371/journal.pone.0181365)
Supplement: S1 Table — (XLS) [file pone.0181365.s001.xls]

## Sheet: Raw data
			Raw matched sequence counts for biological replicates
Locus	Gene	Product	Group1_replicate 1	Group1_replicate 2	Group1_replicate 3	Group2_replicate 1	Group2_replicate 2	Group2_replicate 3	Group3_replicate 1	Group3_replicate 2	Group3_replicate 3	Input_ replicate 1	Input_replicate 2
FQ312003.1012	FQ312003.1012	FQ312003.1012	3	4	2	6	1	0	0	6	7	61	105
FQ312003.1187	FQ312003.1187	FQ312003.1187	8	9	0	8	4	4	0	0	10	1025	793
FQ312003.1229	FQ312003.1229	FQ312003.1229	0	0	2	1	0	0	0	4	5	119	128
FQ312003.1320	FQ312003.1320	FQ312003.1320	2	0	0	0	0	0	0	0	2	75	41
FQ312003.1463	FQ312003.1463	FQ312003.1463	6	4	0	0	0	2	2	0	0	259	165
FQ312003.1509	FQ312003.1509	FQ312003.1509	0	3	0	0	0	0	2	0	4	31	47
FQ312003.1526	FQ312003.1526	FQ312003.1526	6	0	0	2	0	0	0	3	22	583	819
FQ312003.160	FQ312003.160	FQ312003.160	14	2	2	2	4	4	4	1	2	392	593
FQ312003.1627	FQ312003.1627	FQ312003.1627	1	2	0	0	0	0	0	0	2	91	58
FQ312003.1815	FQ312003.1815	FQ312003.1815	1	2	0	1	1	2	0	0	2	336	210
FQ312003.1816	FQ312003.1816	FQ312003.1816	3	2	2	5	2	10	0	4	9	1246	1246
FQ312003.1817	FQ312003.1817	FQ312003.1817	12	0	0	0	5	0	4	0	3	249	255
FQ312003.1857	FQ312003.1857	FQ312003.1857	4	4	0	2	0	0	2	0	3	656	331
FQ312003.1858	FQ312003.1858	FQ312003.1858	7	0	0	0	0	0	2	0	3	34	22
FQ312003.1902	FQ312003.1902	FQ312003.1902	3	0	0	0	0	0	2	1	0	76	50
FQ312003.2526	FQ312003.2526	FQ312003.2526	158	18	0	2	7	4	4	18	34	920	1260
FQ312003.2779	FQ312003.2779	FQ312003.2779	2	2	0	3	0	0	4	2	8	46	56
FQ312003.2802	FQ312003.2802	FQ312003.2802	16	2	2	6	4	0	4	4	17	3451	2634
FQ312003.2803	FQ312003.2803	FQ312003.2803	10	0	0	0	0	0	2	0	2	41	43
FQ312003.2944	FQ312003.2944	FQ312003.2944	1	0	0	0	2	0	2	0	2	71	108
FQ312003.298	FQ312003.298	FQ312003.298	2	0	0	0	0	0	0	0	4	158	152
FQ312003.300	FQ312003.300	FQ312003.300	0	2	0	0	0	0	0	0	4	57	89
FQ312003.302	FQ312003.302	FQ312003.302	0	2	0	0	0	0	0	0	0	14	3
FQ312003.318	FQ312003.318	FQ312003.318	7	5	0	0	2	0	1	0	4	19	49
FQ312003.329	FQ312003.329	FQ312003.329	4	2	0	0	0	0	2	0	1	98	129
FQ312003.3325	FQ312003.3325	FQ312003.3325	10	2	2	2	4	4	2	2	12	4395	4512
FQ312003.3576	FQ312003.3576	FQ312003.3576	14	3	0	6	1	0	0	2	4	210	606
FQ312003.3676	FQ312003.3676	FQ312003.3676	3	0	0	0	0	0	1	1	0	351	204
FQ312003.3689	FQ312003.3689	FQ312003.3689	4	0	0	6	1	6	4	2	7	4102	2380
FQ312003.3806	FQ312003.3806	FQ312003.3806	4	3	0	0	0	0	2	0	4	85	131
FQ312003.3827	FQ312003.3827	FQ312003.3827	24	8	0	0	0	0	6	0	4	100	120
FQ312003.3896	FQ312003.3896	FQ312003.3896	2	2	0	2	2	0	2	0	8	500	228
FQ312003.3939	FQ312003.3939	FQ312003.3939	29	6	0	0	1	4	10	0	11	523	707
FQ312003.3994	FQ312003.3994	FQ312003.3994	0	0	0	0	0	0	1	0	2	180	185
FQ312003.4083	FQ312003.4083	FQ312003.4083	14	4	6	30	24	16	6	46	42	4784	7564
FQ312003.4330	FQ312003.4330	FQ312003.4330	1	4	0	2	2	2	4	2	6	340	303
FQ312003.4416	FQ312003.4416	FQ312003.4416	0	0	0	0	0	0	0	0	0	7	8
FQ312003.4483	FQ312003.4483	FQ312003.4483	1	0	1	0	0	2	2	0	0	157	119
FQ312003.4499	FQ312003.4499	FQ312003.4499	12	6	4	2	4	7	0	2	1	55	61
FQ312003.4543	FQ312003.4543	FQ312003.4543	1	2	0	0	0	0	0	0	1	55	74
FQ312003.4561	FQ312003.4561	FQ312003.4561	2	1	0	3	0	2	1	2	0	467	425
FQ312003.4643	FQ312003.4643	FQ312003.4643	6	0	2	0	6	0	0	2	6	270	270
FQ312003.655	FQ312003.655	FQ312003.655	4	2	0	0	2	0	2	0	6	46	35
FQ312003.67	FQ312003.67	FQ312003.67	4	1	0	0	1	0	7	0	2	39	33
FQ312003.716	FQ312003.716	FQ312003.716	5	0	0	0	0	1	0	0	2	45	15
FQ312003.74	FQ312003.74	FQ312003.74	9	2	0	0	0	2	8	4	1	493	307
FQ312003.869	FQ312003.869	FQ312003.869	1	1	0	0	4	0	0	4	1	88	234
FQ312003_intergenic_1_118	FQ312003_intergenic_1_118	FQ312003_intergenic_1_118	2	2	2	2	0	0	0	2	0	305	365
FQ312003_intergenic_1000151_1000308	FQ312003_intergenic_1000151_1000308	FQ312003_intergenic_1000151_1000308	3	1	0	3	3	2	0	2	7	1805	2060
FQ312003_intergenic_1001702_1001837	FQ312003_intergenic_1001702_1001837	FQ312003_intergenic_1001702_1001837	2	0	0	0	1	2	0	0	2	1703	662
FQ312003_intergenic_1005876_1006124	FQ312003_intergenic_1005876_1006124	FQ312003_intergenic_1005876_1006124	2	4	0	1	0	0	0	0	8	880	678
FQ312003_intergenic_100694_100791	FQ312003_intergenic_100694_100791	FQ312003_intergenic_100694_100791	2	4	0	0	0	0	0	0	1	37	49
FQ312003_intergenic_1007374_1007490	FQ312003_intergenic_1007374_1007490	FQ312003_intergenic_1007374_1007490	4	2	0	0	3	0	0	4	4	144	93
FQ312003_intergenic_1009013_1009204	FQ312003_intergenic_1009013_1009204	FQ312003_intergenic_1009013_1009204	0	0	0	0	1	0	0	0	0	21	55
FQ312003_intergenic_1010548_1010577	FQ312003_intergenic_1010548_1010577	FQ312003_intergenic_1010548_1010577	0	5	1	7	3	5	0	8	16	352	186
FQ312003_intergenic_1014913_1015216	FQ312003_intergenic_1014913_1015216	FQ312003_intergenic_1014913_1015216	2	1	0	3	0	0	0	6	4	959	792
FQ312003_intergenic_1017078_1017113	FQ312003_intergenic_1017078_1017113	FQ312003_intergenic_1017078_1017113	1	0	0	0	1	0	1	0	0	3	1
FQ312003_intergenic_1017907_1017991	FQ312003_intergenic_1017907_1017991	FQ312003_intergenic_1017907_1017991	1	1	0	0	0	0	2	0	0	61	111
FQ312003_intergenic_1020535_1020576	FQ312003_intergenic_1020535_1020576	FQ312003_intergenic_1020535_1020576	1	1	0	0	0	0	0	0	0	27	13
FQ312003_intergenic_1021439_1021510	FQ312003_intergenic_1021439_1021510	FQ312003_intergenic_1021439_1021510	1	0	0	0	0	0	1	0	0	25	7
FQ312003_intergenic_1022295_1022307	FQ312003_intergenic_1022295_1022307	FQ312003_intergenic_1022295_1022307	2	1	0	4	1	2	0	1	7	570	873
FQ312003_intergenic_1024082_1024136	FQ312003_intergenic_1024082_1024136	FQ312003_intergenic_1024082_1024136	0	2	0	0	0	2	0	0	1	17	31
FQ312003_intergenic_1024522_1024650	FQ312003_intergenic_1024522_1024650	FQ312003_intergenic_1024522_1024650	0	0	0	0	0	0	0	2	4	35	21
FQ312003_intergenic_1032028_1032137	FQ312003_intergenic_1032028_1032137	FQ312003_intergenic_1032028_1032137	1	0	0	0	1	0	0	0	0	109	102
FQ312003_intergenic_1033888_1033922	FQ312003_intergenic_1033888_1033922	FQ312003_intergenic_1033888_1033922	0	0	0	0	0	0	0	0	0	18	11
FQ312003_intergenic_1041293_1041536	FQ312003_intergenic_1041293_1041536	FQ312003_intergenic_1041293_1041536	2	2	0	3	0	0	0	3	4	331	255
FQ312003_intergenic_1043479_1043637	FQ312003_intergenic_1043479_1043637	FQ312003_intergenic_1043479_1043637	5	0	0	2	0	0	0	2	12	1123	1003
FQ312003_intergenic_1046214_1046297	FQ312003_intergenic_1046214_1046297	FQ312003_intergenic_1046214_1046297	3	0	0	0	0	0	0	0	0	60	50
FQ312003_intergenic_1047490_1047995	FQ312003_intergenic_1047490_1047995	FQ312003_intergenic_1047490_1047995	4	2	0	0	1	2	2	1	11	7172	3790
FQ312003_intergenic_1049497_1049596	FQ312003_intergenic_1049497_1049596	FQ312003_intergenic_1049497_1049596	0	0	0	0	1	0	0	0	1	281	438
FQ312003_intergenic_1050159_1050374	FQ312003_intergenic_1050159_1050374	FQ312003_intergenic_1050159_1050374	3	0	0	2	0	2	0	0	0	132	99
FQ312003_intergenic_1051690_1051833	FQ312003_intergenic_1051690_1051833	FQ312003_intergenic_1051690_1051833	4	1	0	0	0	0	0	0	0	8	12
FQ312003_intergenic_1054651_1054744	FQ312003_intergenic_1054651_1054744	FQ312003_intergenic_1054651_1054744	2	0	0	1	0	0	0	0	5	90	106
FQ312003_intergenic_1060759_1060784	FQ312003_intergenic_1060759_1060784	FQ312003_intergenic_1060759_1060784	0	1	0	0	0	0	1	0	0	4	5
FQ312003_intergenic_1062009_1062301	FQ312003_intergenic_1062009_1062301	FQ312003_intergenic_1062009_1062301	4	0	0	0	0	0	0	0	3	520	396
FQ312003_intergenic_1065631_1065821	FQ312003_intergenic_1065631_1065821	FQ312003_intergenic_1065631_1065821	0	0	0	0	0	2	0	1	5	375	274
FQ312003_intergenic_1066156_1066470	FQ312003_intergenic_1066156_1066470	FQ312003_intergenic_1066156_1066470	0	0	0	2	4	0	0	2	6	2030	1572
FQ312003_intergenic_1067174_1067281	FQ312003_intergenic_1067174_1067281	FQ312003_intergenic_1067174_1067281	1	0	0	0	0	0	0	0	0	10	27
FQ312003_intergenic_1069308_1069380	FQ312003_intergenic_1069308_1069380	FQ312003_intergenic_1069308_1069380	0	0	0	0	0	0	0	1	0	19	17
FQ312003_intergenic_1069607_1069641	FQ312003_intergenic_1069607_1069641	FQ312003_intergenic_1069607_1069641	2	0	0	0	0	0	0	0	1	37	45
FQ312003_intergenic_1070192_1070451	FQ312003_intergenic_1070192_1070451	FQ312003_intergenic_1070192_1070451	2	2	0	0	2	0	4	0	1	208	170
FQ312003_intergenic_1071239_1071407	FQ312003_intergenic_1071239_1071407	FQ312003_intergenic_1071239_1071407	2	0	0	0	0	0	1	0	0	230	143
FQ312003_intergenic_1072777_1072883	FQ312003_intergenic_1072777_1072883	FQ312003_intergenic_1072777_1072883	3	0	0	0	0	0	0	0	0	11	17
FQ312003_intergenic_1075613_1075711	FQ312003_intergenic_1075613_1075711	FQ312003_intergenic_1075613_1075711	2	0	0	0	0	0	1	0	0	9	21
FQ312003_intergenic_108224_108376	FQ312003_intergenic_108224_108376	FQ312003_intergenic_108224_108376	2	5	0	1	0	1	1	1	3	191	171
FQ312003_intergenic_1086539_1086554	FQ312003_intergenic_1086539_1086554	FQ312003_intergenic_1086539_1086554	0	0	1	1	0	0	0	0	0	2	2
FQ312003_intergenic_1092745_1092978	FQ312003_intergenic_1092745_1092978	FQ312003_intergenic_1092745_1092978	1	0	0	0	0	0	0	0	0	22	20
FQ312003_intergenic_1096087_1096242	FQ312003_intergenic_1096087_1096242	FQ312003_intergenic_1096087_1096242	0	2	0	0	0	0	0	0	0	92	72
FQ312003_intergenic_1097828_1097858	FQ312003_intergenic_1097828_1097858	FQ312003_intergenic_1097828_1097858	0	2	0	1	0	0	0	2	4	32	29
FQ312003_intergenic_1099625_1099794	FQ312003_intergenic_1099625_1099794	FQ312003_intergenic_1099625_1099794	1	0	0	2	2	0	2	1	2	604	288
FQ312003_intergenic_1100087_1100412	FQ312003_intergenic_1100087_1100412	FQ312003_intergenic_1100087_1100412	1	0	0	2	0	3	2	0	0	588	420
FQ312003_intergenic_1103126_1103205	FQ312003_intergenic_1103126_1103205	FQ312003_intergenic_1103126_1103205	3	0	0	0	0	1	1	0	2	7	14
FQ312003_intergenic_1104344_1104408	FQ312003_intergenic_1104344_1104408	FQ312003_intergenic_1104344_1104408	3	1	0	0	0	0	0	1	3	263	231
FQ312003_intergenic_1113758_1113912	FQ312003_intergenic_1113758_1113912	FQ312003_intergenic_1113758_1113912	2	1	0	0	0	0	0	3	1	148	178
FQ312003_intergenic_1116454_1116712	FQ312003_intergenic_1116454_1116712	FQ312003_intergenic_1116454_1116712	0	0	6	4	0	2	0	2	9	731	387
FQ312003_intergenic_1118390_1118645	FQ312003_intergenic_1118390_1118645	FQ312003_intergenic_1118390_1118645	4	5	5	24	10	13	0	16	54	5668	4619
FQ312003_intergenic_1119256_1119371	FQ312003_intergenic_1119256_1119371	FQ312003_intergenic_1119256_1119371	2	1	0	0	0	0	3	0	0	40	18
FQ312003_intergenic_1122683_1122705	FQ312003_intergenic_1122683_1122705	FQ312003_intergenic_1122683_1122705	0	0	0	0	0	0	0	0	2	17	7
FQ312003_intergenic_1126112_1126181	FQ312003_intergenic_1126112_1126181	FQ312003_intergenic_1126112_1126181	0	0	0	0	0	0	0	0	1	72	38
FQ312003_intergenic_1128330_1128443	FQ312003_intergenic_1128330_1128443	FQ312003_intergenic_1128330_1128443	1	0	0	0	0	0	0	0	0	182	111
FQ312003_intergenic_11296_11542	FQ312003_intergenic_11296_11542	FQ312003_intergenic_11296_11542	3	2	1	7	1	6	0	7	0	1619	1947
FQ312003_intergenic_112962_113034	FQ312003_intergenic_112962_113034	FQ312003_intergenic_112962_113034	3	1	0	0	1	1	0	0	1	273	333
FQ312003_intergenic_1131219_1131819	FQ312003_intergenic_1131219_1131819	FQ312003_intergenic_1131219_1131819	3	1	0	9	1	2	4	0	7	599	328
FQ312003_intergenic_1132601_1132721	FQ312003_intergenic_1132601_1132721	FQ312003_intergenic_1132601_1132721	3	2	1	8	2	5	0	8	14	68	45
FQ312003_intergenic_1133698_1133808	FQ312003_intergenic_1133698_1133808	FQ312003_intergenic_1133698_1133808	1	0	2	4	2	4	0	10	16	263	111
FQ312003_intergenic_1136289_1136519	FQ312003_intergenic_1136289_1136519	FQ312003_intergenic_1136289_1136519	2	0	0	2	2	2	0	0	3	586	390
FQ312003_intergenic_1138480_1138551	FQ312003_intergenic_1138480_1138551	FQ312003_intergenic_1138480_1138551	0	1	0	2	0	0	0	0	1	63	42
FQ312003_intergenic_1141236_1141467	FQ312003_intergenic_1141236_1141467	FQ312003_intergenic_1141236_1141467	4	2	0	0	0	2	0	1	2	58	94
FQ312003_intergenic_1143661_1143777	FQ312003_intergenic_1143661_1143777	FQ312003_intergenic_1143661_1143777	3	1	0	0	0	0	2	0	0	30	50
FQ312003_intergenic_1144319_1144492	FQ312003_intergenic_1144319_1144492	FQ312003_intergenic_1144319_1144492	4	1	0	1	0	0	0	2	4	102	35
FQ312003_intergenic_1148589_1148630	FQ312003_intergenic_1148589_1148630	FQ312003_intergenic_1148589_1148630	2	0	0	0	1	0	1	0	0	14	11
FQ312003_intergenic_1153643_1153949	FQ312003_intergenic_1153643_1153949	FQ312003_intergenic_1153643_1153949	5	2	0	0	0	2	1	1	0	370	187
FQ312003_intergenic_1154413_1154965	FQ312003_intergenic_1154413_1154965	FQ312003_intergenic_1154413_1154965	5	6	0	0	0	0	2	0	7	170	89
FQ312003_intergenic_1156292_1156425	FQ312003_intergenic_1156292_1156425	FQ312003_intergenic_1156292_1156425	0	0	0	0	0	0	0	0	2	158	115
FQ312003_intergenic_1159940_1159971	FQ312003_intergenic_1159940_1159971	FQ312003_intergenic_1159940_1159971	0	0	0	0	0	0	1	0	2	2	4
FQ312003_intergenic_1162192_1162475	FQ312003_intergenic_1162192_1162475	FQ312003_intergenic_1162192_1162475	4	0	0	0	3	2	2	0	8	2243	1311
FQ312003_intergenic_1162744_1162779	FQ312003_intergenic_1162744_1162779	FQ312003_intergenic_1162744_1162779	0	1	0	1	1	0	2	1	2	326	137
FQ312003_intergenic_116305_116768	FQ312003_intergenic_116305_116768	FQ312003_intergenic_116305_116768	9	0	0	0	1	0	2	0	4	114	63
FQ312003_intergenic_1167932_1168252	FQ312003_intergenic_1167932_1168252	FQ312003_intergenic_1167932_1168252	1	2	0	0	0	0	0	0	4	181	125
FQ312003_intergenic_1169862_1170587	FQ312003_intergenic_1169862_1170587	FQ312003_intergenic_1169862_1170587	3	0	0	0	5	6	0	2	14	10225	4185
FQ312003_intergenic_1172530_1172713	FQ312003_intergenic_1172530_1172713	FQ312003_intergenic_1172530_1172713	4	0	0	4	0	0	0	0	2	148	286
FQ312003_intergenic_1174311_1174546	FQ312003_intergenic_1174311_1174546	FQ312003_intergenic_1174311_1174546	2	2	0	0	1	1	0	0	0	72	55
FQ312003_intergenic_1175328_1175732	FQ312003_intergenic_1175328_1175732	FQ312003_intergenic_1175328_1175732	4	2	0	0	2	2	0	1	0	225	81
FQ312003_intergenic_1177732_1177913	FQ312003_intergenic_1177732_1177913	FQ312003_intergenic_1177732_1177913	1	0	0	1	0	1	0	1	2	23	15
FQ312003_intergenic_117990_118029	FQ312003_intergenic_117990_118029	FQ312003_intergenic_117990_118029	0	0	0	0	0	0	0	0	0	3	4
FQ312003_intergenic_1180412_1181154	FQ312003_intergenic_1180412_1181154	FQ312003_intergenic_1180412_1181154	5	2	3	2	1	0	56	1	12	155	113
FQ312003_intergenic_1184962_1184974	FQ312003_intergenic_1184962_1184974	FQ312003_intergenic_1184962_1184974	1	0	0	0	0	0	0	0	0	43	32
FQ312003_intergenic_1186569_1187222	FQ312003_intergenic_1186569_1187222	FQ312003_intergenic_1186569_1187222	5	0	0	0	0	0	2	0	0	38	29
FQ312003_intergenic_1188664_1188693	FQ312003_intergenic_1188664_1188693	FQ312003_intergenic_1188664_1188693	0	0	0	0	0	0	0	0	0	115	67
FQ312003_intergenic_1192338_1192508	FQ312003_intergenic_1192338_1192508	FQ312003_intergenic_1192338_1192508	3	1	0	0	0	0	1	0	0	743	572
FQ312003_intergenic_1198653_1198706	FQ312003_intergenic_1198653_1198706	FQ312003_intergenic_1198653_1198706	2	0	0	0	0	0	4	0	3	56	69
FQ312003_intergenic_1199728_1199846	FQ312003_intergenic_1199728_1199846	FQ312003_intergenic_1199728_1199846	0	1	0	0	0	0	0	0	0	111	61
FQ312003_intergenic_1202196_1202357	FQ312003_intergenic_1202196_1202357	FQ312003_intergenic_1202196_1202357	2	0	0	0	1	0	0	0	2	91	66
FQ312003_intergenic_1203731_1203742	FQ312003_intergenic_1203731_1203742	FQ312003_intergenic_1203731_1203742	0	0	0	0	0	0	0	0	0	129	138
FQ312003_intergenic_1204101_1204286	FQ312003_intergenic_1204101_1204286	FQ312003_intergenic_1204101_1204286	0	0	0	0	0	1	0	2	3	858	734
FQ312003_intergenic_1206418_1206441	FQ312003_intergenic_1206418_1206441	FQ312003_intergenic_1206418_1206441	0	0	0	0	0	0	0	0	2	81	56
FQ312003_intergenic_1208462_1208597	FQ312003_intergenic_1208462_1208597	FQ312003_intergenic_1208462_1208597	1	0	0	0	0	0	0	0	2	124	87
FQ312003_intergenic_1210891_1211054	FQ312003_intergenic_1210891_1211054	FQ312003_intergenic_1210891_1211054	0	0	0	0	0	0	0	0	0	54	38
FQ312003_intergenic_121353_121592	FQ312003_intergenic_121353_121592	FQ312003_intergenic_121353_121592	6	2	0	0	0	0	0	0	3	67	61
FQ312003_intergenic_1214283_1214338	FQ312003_intergenic_1214283_1214338	FQ312003_intergenic_1214283_1214338	2	0	0	0	0	0	0	0	3	7	11
FQ312003_intergenic_1224290_1224445	FQ312003_intergenic_1224290_1224445	FQ312003_intergenic_1224290_1224445	4	0	0	0	0	0	2	0	1	8	7
FQ312003_intergenic_122539_122556	FQ312003_intergenic_122539_122556	FQ312003_intergenic_122539_122556	0	0	1	0	0	0	0	0	0	84	49
FQ312003_intergenic_1227750_1228222	FQ312003_intergenic_1227750_1228222	FQ312003_intergenic_1227750_1228222	2	6	2	0	4	2	6	2	23	700	741
FQ312003_intergenic_1229283_1229337	FQ312003_intergenic_1229283_1229337	FQ312003_intergenic_1229283_1229337	0	3	0	0	0	0	0	1	1	3	14
FQ312003_intergenic_1230182_1230286	FQ312003_intergenic_1230182_1230286	FQ312003_intergenic_1230182_1230286	0	1	0	2	2	0	1	2	3	138	124
FQ312003_intergenic_1231268_1231364	FQ312003_intergenic_1231268_1231364	FQ312003_intergenic_1231268_1231364	2	0	0	2	0	0	2	1	9	1073	833
FQ312003_intergenic_1232212_1232244	FQ312003_intergenic_1232212_1232244	FQ312003_intergenic_1232212_1232244	1	0	0	2	3	2	0	3	6	41	90
FQ312003_intergenic_1236150_1236204	FQ312003_intergenic_1236150_1236204	FQ312003_intergenic_1236150_1236204	4	1	4	5	3	6	0	3	23	1461	1383
FQ312003_intergenic_1237869_1237891	FQ312003_intergenic_1237869_1237891	FQ312003_intergenic_1237869_1237891	0	0	0	2	1	0	0	0	0	4	12
FQ312003_intergenic_1242267_1242460	FQ312003_intergenic_1242267_1242460	FQ312003_intergenic_1242267_1242460	1	0	0	0	4	2	1	5	14	416	315
FQ312003_intergenic_1246254_1246494	FQ312003_intergenic_1246254_1246494	FQ312003_intergenic_1246254_1246494	7	3	0	0	0	0	0	0	0	40	54
FQ312003_intergenic_1250392_1250545	FQ312003_intergenic_1250392_1250545	FQ312003_intergenic_1250392_1250545	0	0	0	0	0	0	0	0	1	5	1
FQ312003_intergenic_1251951_1252028	FQ312003_intergenic_1251951_1252028	FQ312003_intergenic_1251951_1252028	2	0	0	0	0	0	0	0	0	12	12
FQ312003_intergenic_1253379_1253519	FQ312003_intergenic_1253379_1253519	FQ312003_intergenic_1253379_1253519	0	1	0	0	0	0	5	0	2	163	77
FQ312003_intergenic_1254940_1254986	FQ312003_intergenic_1254940_1254986	FQ312003_intergenic_1254940_1254986	0	2	0	0	1	1	2	0	3	4	3
FQ312003_intergenic_1258534_1258770	FQ312003_intergenic_1258534_1258770	FQ312003_intergenic_1258534_1258770	9	2	0	0	2	0	0	0	1	453	398
FQ312003_intergenic_1265721_1265935	FQ312003_intergenic_1265721_1265935	FQ312003_intergenic_1265721_1265935	3	3	1	10	6	2	0	9	11	578	312
FQ312003_intergenic_1267047_1267274	FQ312003_intergenic_1267047_1267274	FQ312003_intergenic_1267047_1267274	0	6	0	2	1	0	0	0	2	74	29
FQ312003_intergenic_126724_126800	FQ312003_intergenic_126724_126800	FQ312003_intergenic_126724_126800	0	3	0	0	0	0	0	0	1	52	46
FQ312003_intergenic_1269359_1269508	FQ312003_intergenic_1269359_1269508	FQ312003_intergenic_1269359_1269508	0	0	0	0	0	0	0	0	1	44	30
FQ312003_intergenic_1276267_1276289	FQ312003_intergenic_1276267_1276289	FQ312003_intergenic_1276267_1276289	0	0	0	0	0	0	0	0	2	57	53
FQ312003_intergenic_1281117_1281187	FQ312003_intergenic_1281117_1281187	FQ312003_intergenic_1281117_1281187	3	3	0	13	1	7	0	8	16	1667	1130
FQ312003_intergenic_1282539_1282885	FQ312003_intergenic_1282539_1282885	FQ312003_intergenic_1282539_1282885	4	3	0	0	2	0	2	5	10	2137	956
FQ312003_intergenic_1284111_1284991	FQ312003_intergenic_1284111_1284991	FQ312003_intergenic_1284111_1284991	10	2	0	0	1	0	5	2	4	93	93
FQ312003_intergenic_128560_129009	FQ312003_intergenic_128560_129009	FQ312003_intergenic_128560_129009	11	2	14	42	22	12	2	190	276	544	555
FQ312003_intergenic_1285881_1286268	FQ312003_intergenic_1285881_1286268	FQ312003_intergenic_1285881_1286268	4	1	0	1	0	0	0	4	0	244	277
FQ312003_intergenic_1286609_1286698	FQ312003_intergenic_1286609_1286698	FQ312003_intergenic_1286609_1286698	3	0	1	2	0	0	0	1	6	155	236
FQ312003_intergenic_1287321_1287634	FQ312003_intergenic_1287321_1287634	FQ312003_intergenic_1287321_1287634	4	1	0	10	3	3	2	3	7	902	773
FQ312003_intergenic_1287948_1287978	FQ312003_intergenic_1287948_1287978	FQ312003_intergenic_1287948_1287978	0	0	0	1	1	1	0	1	5	25	27
FQ312003_intergenic_1288343_1289140	FQ312003_intergenic_1288343_1289140	FQ312003_intergenic_1288343_1289140	24	28	32	135	49	95	8	106	270	1897	643
FQ312003_intergenic_1289712_1290847	FQ312003_intergenic_1289712_1290847	FQ312003_intergenic_1289712_1290847	5	9	1	18	2	24	2	7	19	4743	4155
FQ312003_intergenic_1291293_1291894	FQ312003_intergenic_1291293_1291894	FQ312003_intergenic_1291293_1291894	2	2	4	14	3	15	0	9	32	4695	4411
FQ312003_intergenic_1292268_1292318	FQ312003_intergenic_1292268_1292318	FQ312003_intergenic_1292268_1292318	0	1	0	1	1	0	0	0	0	181	135
FQ312003_intergenic_1292887_1293124	FQ312003_intergenic_1292887_1293124	FQ312003_intergenic_1292887_1293124	5	0	0	0	0	0	0	1	6	275	281
FQ312003_intergenic_1294882_1294929	FQ312003_intergenic_1294882_1294929	FQ312003_intergenic_1294882_1294929	2	3	1	0	0	0	3	0	2	453	926
FQ312003_intergenic_1295345_1295925	FQ312003_intergenic_1295345_1295925	FQ312003_intergenic_1295345_1295925	6	0	2	0	1	2	6	2	13	2376	2114
FQ312003_intergenic_1302027_1302119	FQ312003_intergenic_1302027_1302119	FQ312003_intergenic_1302027_1302119	0	0	0	0	0	0	1	0	0	20	14
FQ312003_intergenic_1302547_1302642	FQ312003_intergenic_1302547_1302642	FQ312003_intergenic_1302547_1302642	1	0	0	4	0	0	1	0	0	14	7
FQ312003_intergenic_1304288_1304331	FQ312003_intergenic_1304288_1304331	FQ312003_intergenic_1304288_1304331	0	1	0	0	0	0	0	0	0	153	91
FQ312003_intergenic_1305943_1306096	FQ312003_intergenic_1305943_1306096	FQ312003_intergenic_1305943_1306096	0	1	0	2	0	0	0	2	4	114	230
FQ312003_intergenic_1307302_1307397	FQ312003_intergenic_1307302_1307397	FQ312003_intergenic_1307302_1307397	4	1	0	7	4	9	0	3	10	9	15
FQ312003_intergenic_1308137_1308208	FQ312003_intergenic_1308137_1308208	FQ312003_intergenic_1308137_1308208	1	0	2	0	0	0	0	0	0	22	50
FQ312003_intergenic_1308856_1308984	FQ312003_intergenic_1308856_1308984	FQ312003_intergenic_1308856_1308984	0	0	0	0	0	0	0	0	0	18	5
FQ312003_intergenic_1309727_1309747	FQ312003_intergenic_1309727_1309747	FQ312003_intergenic_1309727_1309747	1	0	0	0	0	0	1	0	0	7	11
FQ312003_intergenic_1310290_1310621	FQ312003_intergenic_1310290_1310621	FQ312003_intergenic_1310290_1310621	3	2	0	0	2	2	0	0	4	916	749
FQ312003_intergenic_1311687_1311704	FQ312003_intergenic_1311687_1311704	FQ312003_intergenic_1311687_1311704	3	0	0	0	0	3	0	0	1	14	29
FQ312003_intergenic_1314311_1314519	FQ312003_intergenic_1314311_1314519	FQ312003_intergenic_1314311_1314519	3	2	0	0	1	2	0	0	2	54	101
FQ312003_intergenic_1316682_1317221	FQ312003_intergenic_1316682_1317221	FQ312003_intergenic_1316682_1317221	6	14	106	336	122	301	4	245	823	4026	4061
FQ312003_intergenic_1318609_1318630	FQ312003_intergenic_1318609_1318630	FQ312003_intergenic_1318609_1318630	2	1	0	1	1	0	0	1	2	55	68
FQ312003_intergenic_1320666_1320991	FQ312003_intergenic_1320666_1320991	FQ312003_intergenic_1320666_1320991	6	4	0	0	2	4	0	0	7	3326	2125
FQ312003_intergenic_1321839_1322027	FQ312003_intergenic_1321839_1322027	FQ312003_intergenic_1321839_1322027	1	3	0	0	0	0	0	0	0	123	195
FQ312003_intergenic_1326592_1326802	FQ312003_intergenic_1326592_1326802	FQ312003_intergenic_1326592_1326802	1	2	3	15	12	11	0	6	19	1518	2102
FQ312003_intergenic_1327667_1327917	FQ312003_intergenic_1327667_1327917	FQ312003_intergenic_1327667_1327917	5	2	0	0	1	0	2	4	5	496	518
FQ312003_intergenic_1331670_1331742	FQ312003_intergenic_1331670_1331742	FQ312003_intergenic_1331670_1331742	0	2	0	0	0	0	0	0	0	60	43
FQ312003_intergenic_1332395_1332411	FQ312003_intergenic_1332395_1332411	FQ312003_intergenic_1332395_1332411	1	0	0	0	0	0	0	0	0	53	102
FQ312003_intergenic_1336883_1337020	FQ312003_intergenic_1336883_1337020	FQ312003_intergenic_1336883_1337020	2	0	0	0	0	0	0	0	1	351	307
FQ312003_intergenic_1338652_1338996	FQ312003_intergenic_1338652_1338996	FQ312003_intergenic_1338652_1338996	2	0	0	0	0	0	3	0	0	120	102
FQ312003_intergenic_133966_134521	FQ312003_intergenic_133966_134521	FQ312003_intergenic_133966_134521	2	0	0	0	0	0	0	2	6	67	21
FQ312003_intergenic_1345125_1345359	FQ312003_intergenic_1345125_1345359	FQ312003_intergenic_1345125_1345359	0	1	0	0	0	0	3	1	0	648	391
FQ312003_intergenic_1347850_1347967	FQ312003_intergenic_1347850_1347967	FQ312003_intergenic_1347850_1347967	2	0	0	0	2	0	0	0	0	150	111
FQ312003_intergenic_1348410_1348609	FQ312003_intergenic_1348410_1348609	FQ312003_intergenic_1348410_1348609	0	1	0	4	0	0	0	2	4	379	411
FQ312003_intergenic_1351723_1351746	FQ312003_intergenic_1351723_1351746	FQ312003_intergenic_1351723_1351746	1	1	0	0	0	0	0	0	0	16	18
FQ312003_intergenic_135567_135850	FQ312003_intergenic_135567_135850	FQ312003_intergenic_135567_135850	4	0	0	0	0	0	2	0	0	25	20
FQ312003_intergenic_1356270_1356533	FQ312003_intergenic_1356270_1356533	FQ312003_intergenic_1356270_1356533	3	1	0	0	0	0	0	0	2	91	143
FQ312003_intergenic_1358370_1358405	FQ312003_intergenic_1358370_1358405	FQ312003_intergenic_1358370_1358405	3	0	0	0	0	0	0	0	0	45	26
FQ312003_intergenic_1359106_1359142	FQ312003_intergenic_1359106_1359142	FQ312003_intergenic_1359106_1359142	0	0	1	0	0	0	0	2	1	51	79
FQ312003_intergenic_1359912_1359959	FQ312003_intergenic_1359912_1359959	FQ312003_intergenic_1359912_1359959	1	0	0	1	0	0	2	0	1	128	79
FQ312003_intergenic_1362926_1363113	FQ312003_intergenic_1362926_1363113	FQ312003_intergenic_1362926_1363113	0	0	0	0	0	1	0	0	0	251	226
FQ312003_intergenic_1364981_1365022	FQ312003_intergenic_1364981_1365022	FQ312003_intergenic_1364981_1365022	3	0	1	0	2	0	0	0	1	417	183
FQ312003_intergenic_1366289_1366360	FQ312003_intergenic_1366289_1366360	FQ312003_intergenic_1366289_1366360	0	1	0	1	2	3	0	0	3	43	54
FQ312003_intergenic_1366668_1366889	FQ312003_intergenic_1366668_1366889	FQ312003_intergenic_1366668_1366889	6	2	0	0	0	0	0	0	2	601	392
FQ312003_intergenic_1368214_1369004	FQ312003_intergenic_1368214_1369004	FQ312003_intergenic_1368214_1369004	4	1	0	2	1	8	1	0	5	3082	2475
FQ312003_intergenic_1372280_1372480	FQ312003_intergenic_1372280_1372480	FQ312003_intergenic_1372280_1372480	1	0	1	0	0	0	1	1	4	63	94
FQ312003_intergenic_1376272_1376373	FQ312003_intergenic_1376272_1376373	FQ312003_intergenic_1376272_1376373	2	1	0	0	0	1	0	2	5	124	149
FQ312003_intergenic_1379388_1379600	FQ312003_intergenic_1379388_1379600	FQ312003_intergenic_1379388_1379600	0	0	0	2	0	0	2	3	5	767	458
FQ312003_intergenic_138107_138289	FQ312003_intergenic_138107_138289	FQ312003_intergenic_138107_138289	2	2	0	0	0	1	1	1	2	96	48
FQ312003_intergenic_1382145_1382200	FQ312003_intergenic_1382145_1382200	FQ312003_intergenic_1382145_1382200	2	0	0	0	0	0	0	1	1	25	11
FQ312003_intergenic_1383348_1383402	FQ312003_intergenic_1383348_1383402	FQ312003_intergenic_1383348_1383402	4	0	0	0	0	0	0	0	4	66	117
FQ312003_intergenic_1384337_1384572	FQ312003_intergenic_1384337_1384572	FQ312003_intergenic_1384337_1384572	1	0	0	0	0	0	1	1	0	101	86
FQ312003_intergenic_1392178_1392539	FQ312003_intergenic_1392178_1392539	FQ312003_intergenic_1392178_1392539	3	2	0	0	0	0	0	0	6	163	59
FQ312003_intergenic_139395_139899	FQ312003_intergenic_139395_139899	FQ312003_intergenic_139395_139899	8	0	2	1	0	2	4	2	4	143	100
FQ312003_intergenic_1396367_1396419	FQ312003_intergenic_1396367_1396419	FQ312003_intergenic_1396367_1396419	1	0	0	0	0	0	0	0	1	32	11
FQ312003_intergenic_1399491_1399753	FQ312003_intergenic_1399491_1399753	FQ312003_intergenic_1399491_1399753	0	0	0	2	0	0	2	0	0	36	20
FQ312003_intergenic_1401066_1401105	FQ312003_intergenic_1401066_1401105	FQ312003_intergenic_1401066_1401105	0	0	0	0	0	0	0	0	0	17	10
FQ312003_intergenic_1401566_1401922	FQ312003_intergenic_1401566_1401922	FQ312003_intergenic_1401566_1401922	8	0	0	0	1	0	0	0	2	375	286
FQ312003_intergenic_1403142_1403305	FQ312003_intergenic_1403142_1403305	FQ312003_intergenic_1403142_1403305	9	1	0	1	0	0	2	0	6	247	205
FQ312003_intergenic_1407157_1407343	FQ312003_intergenic_1407157_1407343	FQ312003_intergenic_1407157_1407343	3	0	2	2	4	11	2	5	6	2219	2682
FQ312003_intergenic_1408791_1409116	FQ312003_intergenic_1408791_1409116	FQ312003_intergenic_1408791_1409116	4	0	0	0	0	0	0	0	0	136	65
FQ312003_intergenic_1414737_1414790	FQ312003_intergenic_1414737_1414790	FQ312003_intergenic_1414737_1414790	0	1	0	3	1	0	0	0	0	75	91
FQ312003_intergenic_1416518_1416727	FQ312003_intergenic_1416518_1416727	FQ312003_intergenic_1416518_1416727	4	0	0	1	0	0	1	2	0	129	58
FQ312003_intergenic_1418187_1418541	FQ312003_intergenic_1418187_1418541	FQ312003_intergenic_1418187_1418541	9	0	1	12	2	9	4	6	30	1617	1084
FQ312003_intergenic_1422935_1423156	FQ312003_intergenic_1422935_1423156	FQ312003_intergenic_1422935_1423156	1	0	0	0	0	0	0	0	0	15	22
FQ312003_intergenic_1428088_1428150	FQ312003_intergenic_1428088_1428150	FQ312003_intergenic_1428088_1428150	0	0	0	0	1	0	0	0	4	46	47
FQ312003_intergenic_1431990_1432061	FQ312003_intergenic_1431990_1432061	FQ312003_intergenic_1431990_1432061	1	0	0	0	0	0	0	0	0	64	90
FQ312003_intergenic_1432891_1432968	FQ312003_intergenic_1432891_1432968	FQ312003_intergenic_1432891_1432968	2	0	1	1	0	0	0	0	2	36	71
FQ312003_intergenic_1436501_1436800	FQ312003_intergenic_1436501_1436800	FQ312003_intergenic_1436501_1436800	2	3	0	2	0	4	2	0	1	714	279
FQ312003_intergenic_1440240_1440459	FQ312003_intergenic_1440240_1440459	FQ312003_intergenic_1440240_1440459	3	1	1	39	38	36	7	49	176	195	140
FQ312003_intergenic_1458392_1458763	FQ312003_intergenic_1458392_1458763	FQ312003_intergenic_1458392_1458763	5	1	0	6	0	4	6	4	7	359	268
FQ312003_intergenic_1460238_1460353	FQ312003_intergenic_1460238_1460353	FQ312003_intergenic_1460238_1460353	4	0	1	2	2	2	0	1	4	284	253
FQ312003_intergenic_1462286_1462474	FQ312003_intergenic_1462286_1462474	FQ312003_intergenic_1462286_1462474	1	0	0	2	0	0	0	0	4	1007	1081
FQ312003_intergenic_1463781_1463792	FQ312003_intergenic_1463781_1463792	FQ312003_intergenic_1463781_1463792	0	1	0	0	0	0	0	0	0	3	2
FQ312003_intergenic_1465848_1466214	FQ312003_intergenic_1465848_1466214	FQ312003_intergenic_1465848_1466214	3	0	2	8	9	9	0	27	51	2579	3283
FQ312003_intergenic_1466897_1466922	FQ312003_intergenic_1466897_1466922	FQ312003_intergenic_1466897_1466922	0	0	0	0	0	1	0	0	0	180	267
FQ312003_intergenic_1467878_1468078	FQ312003_intergenic_1467878_1468078	FQ312003_intergenic_1467878_1468078	9	2	0	0	2	0	0	1	1	284	257
FQ312003_intergenic_1476588_1476681	FQ312003_intergenic_1476588_1476681	FQ312003_intergenic_1476588_1476681	0	3	2	8	1	3	0	4	9	533	515
FQ312003_intergenic_1477738_1477908	FQ312003_intergenic_1477738_1477908	FQ312003_intergenic_1477738_1477908	2	0	0	1	2	2	0	1	4	874	390
FQ312003_intergenic_14785_14963	FQ312003_intergenic_14785_14963	FQ312003_intergenic_14785_14963	4	0	0	0	1	2	2	0	1	42	28
FQ312003_intergenic_1480263_1480288	FQ312003_intergenic_1480263_1480288	FQ312003_intergenic_1480263_1480288	2	0	0	0	0	0	0	0	3	53	96
FQ312003_intergenic_1484858_1485358	FQ312003_intergenic_1484858_1485358	FQ312003_intergenic_1484858_1485358	4	0	0	0	0	2	1	4	6	786	377
FQ312003_intergenic_1492668_1493182	FQ312003_intergenic_1492668_1493182	FQ312003_intergenic_1492668_1493182	4	0	2	2	0	0	15	2	16	2489	1632
FQ312003_intergenic_1495400_1496002	FQ312003_intergenic_1495400_1496002	FQ312003_intergenic_1495400_1496002	16	6	0	2	3	0	2	1	6	107	145
FQ312003_intergenic_1498890_1498988	FQ312003_intergenic_1498890_1498988	FQ312003_intergenic_1498890_1498988	0	0	0	0	0	1	1	1	1	516	752
FQ312003_intergenic_1500736_1500802	FQ312003_intergenic_1500736_1500802	FQ312003_intergenic_1500736_1500802	0	0	0	0	0	1	0	0	1	145	138
FQ312003_intergenic_1506427_1506478	FQ312003_intergenic_1506427_1506478	FQ312003_intergenic_1506427_1506478	0	0	0	0	0	0	2	0	2	8	4
FQ312003_intergenic_1507713_1508091	FQ312003_intergenic_1507713_1508091	FQ312003_intergenic_1507713_1508091	0	0	0	0	0	0	0	1	7	351	263
FQ312003_intergenic_1508924_1508949	FQ312003_intergenic_1508924_1508949	FQ312003_intergenic_1508924_1508949	0	0	0	0	0	0	0	0	1	15	15
FQ312003_intergenic_151078_151095	FQ312003_intergenic_151078_151095	FQ312003_intergenic_151078_151095	0	2	3	0	0	3	0	1	2	42	28
FQ312003_intergenic_1510830_1511027	FQ312003_intergenic_1510830_1511027	FQ312003_intergenic_1510830_1511027	2	1	0	0	0	1	0	0	3	57	68
FQ312003_intergenic_1512073_1512498	FQ312003_intergenic_1512073_1512498	FQ312003_intergenic_1512073_1512498	6	0	0	0	0	1	1	2	0	762	589
FQ312003_intergenic_1515528_1515601	FQ312003_intergenic_1515528_1515601	FQ312003_intergenic_1515528_1515601	4	0	0	0	1	2	0	0	0	52	43
FQ312003_intergenic_1516737_1517053	FQ312003_intergenic_1516737_1517053	FQ312003_intergenic_1516737_1517053	0	0	0	4	2	2	2	0	2	3877	3199
FQ312003_intergenic_1518694_1518861	FQ312003_intergenic_1518694_1518861	FQ312003_intergenic_1518694_1518861	3	4	0	0	2	4	0	3	4	50	35
FQ312003_intergenic_1519247_1519504	FQ312003_intergenic_1519247_1519504	FQ312003_intergenic_1519247_1519504	1	2	1	0	1	0	0	1	2	165	155
FQ312003_intergenic_1520859_1520877	FQ312003_intergenic_1520859_1520877	FQ312003_intergenic_1520859_1520877	0	0	0	0	0	0	0	0	0	12	4
FQ312003_intergenic_1521878_1521904	FQ312003_intergenic_1521878_1521904	FQ312003_intergenic_1521878_1521904	2	0	0	0	0	0	0	0	0	19	26
FQ312003_intergenic_1523226_1523250	FQ312003_intergenic_1523226_1523250	FQ312003_intergenic_1523226_1523250	1	0	0	1	0	0	1	0	1	47	22
FQ312003_intergenic_1525292_1525326	FQ312003_intergenic_1525292_1525326	FQ312003_intergenic_1525292_1525326	1	0	0	0	0	0	0	0	2	2	4
FQ312003_intergenic_1528874_1529077	FQ312003_intergenic_1528874_1529077	FQ312003_intergenic_1528874_1529077	0	1	0	0	0	0	0	0	0	22	11
FQ312003_intergenic_1536298_1536350	FQ312003_intergenic_1536298_1536350	FQ312003_intergenic_1536298_1536350	1	0	0	0	0	0	0	0	0	18	13
FQ312003_intergenic_1538552_1538603	FQ312003_intergenic_1538552_1538603	FQ312003_intergenic_1538552_1538603	1	0	0	1	0	0	0	0	0	228	243
FQ312003_intergenic_1539031_1539051	FQ312003_intergenic_1539031_1539051	FQ312003_intergenic_1539031_1539051	0	0	0	0	0	0	0	0	0	5	3
FQ312003_intergenic_1542830_1542872	FQ312003_intergenic_1542830_1542872	FQ312003_intergenic_1542830_1542872	0	0	0	0	0	0	0	0	0	22	22
FQ312003_intergenic_1544710_1544789	FQ312003_intergenic_1544710_1544789	FQ312003_intergenic_1544710_1544789	1	4	0	0	0	0	3	0	2	137	196
FQ312003_intergenic_1545577_1545605	FQ312003_intergenic_1545577_1545605	FQ312003_intergenic_1545577_1545605	1	0	1	0	0	0	1	0	2	294	205
FQ312003_intergenic_1546453_1546490	FQ312003_intergenic_1546453_1546490	FQ312003_intergenic_1546453_1546490	0	0	0	0	0	0	0	0	0	16	21
FQ312003_intergenic_1548634_1548877	FQ312003_intergenic_1548634_1548877	FQ312003_intergenic_1548634_1548877	2	2	0	0	1	2	0	0	0	120	50
FQ312003_intergenic_1549161_1549179	FQ312003_intergenic_1549161_1549179	FQ312003_intergenic_1549161_1549179	2	0	0	1	0	0	0	0	0	15	19
FQ312003_intergenic_1549808_1550133	FQ312003_intergenic_1549808_1550133	FQ312003_intergenic_1549808_1550133	2	3	0	0	0	2	0	0	0	169	81
FQ312003_intergenic_1550627_1551216	FQ312003_intergenic_1550627_1551216	FQ312003_intergenic_1550627_1551216	5	4	2	2	0	6	0	7	13	907	1455
FQ312003_intergenic_1552505_1552631	FQ312003_intergenic_1552505_1552631	FQ312003_intergenic_1552505_1552631	1	1	0	0	0	0	1	0	0	104	82
FQ312003_intergenic_1553635_1553652	FQ312003_intergenic_1553635_1553652	FQ312003_intergenic_1553635_1553652	0	0	0	0	0	0	0	0	1	9	16
FQ312003_intergenic_1554835_1554992	FQ312003_intergenic_1554835_1554992	FQ312003_intergenic_1554835_1554992	0	0	0	0	0	0	1	0	0	49	20
FQ312003_intergenic_1556996_1557010	FQ312003_intergenic_1556996_1557010	FQ312003_intergenic_1556996_1557010	0	1	0	0	0	0	0	0	2	25	96
FQ312003_intergenic_1560833_1560955	FQ312003_intergenic_1560833_1560955	FQ312003_intergenic_1560833_1560955	2	1	0	0	1	0	1	0	1	80	53
FQ312003_intergenic_1562602_1563319	FQ312003_intergenic_1562602_1563319	FQ312003_intergenic_1562602_1563319	5	1	0	0	2	0	3	0	11	649	324
FQ312003_intergenic_1564437_1564476	FQ312003_intergenic_1564437_1564476	FQ312003_intergenic_1564437_1564476	0	0	0	0	0	0	2	0	0	21	17
FQ312003_intergenic_1571808_1572135	FQ312003_intergenic_1571808_1572135	FQ312003_intergenic_1571808_1572135	1	0	0	0	0	0	0	0	2	682	170
FQ312003_intergenic_1576510_1576585	FQ312003_intergenic_1576510_1576585	FQ312003_intergenic_1576510_1576585	3	0	0	0	0	0	0	0	3	7	10
FQ312003_intergenic_157906_158152	FQ312003_intergenic_157906_158152	FQ312003_intergenic_157906_158152	5	0	0	3	0	2	6	4	2	410	447
FQ312003_intergenic_1581585_1581676	FQ312003_intergenic_1581585_1581676	FQ312003_intergenic_1581585_1581676	6	1	0	0	1	0	0	0	1	91	67
FQ312003_intergenic_1583298_1583367	FQ312003_intergenic_1583298_1583367	FQ312003_intergenic_1583298_1583367	3	0	0	0	1	2	2	2	2	1549	2047
FQ312003_intergenic_1583991_1584246	FQ312003_intergenic_1583991_1584246	FQ312003_intergenic_1583991_1584246	0	0	0	0	0	0	2	0	3	138	117
FQ312003_intergenic_1584680_1584721	FQ312003_intergenic_1584680_1584721	FQ312003_intergenic_1584680_1584721	0	0	0	0	0	0	0	0	1	220	152
FQ312003_intergenic_1585731_1585857	FQ312003_intergenic_1585731_1585857	FQ312003_intergenic_1585731_1585857	0	1	0	2	0	0	0	0	0	72	192
FQ312003_intergenic_1586546_1587207	FQ312003_intergenic_1586546_1587207	FQ312003_intergenic_1586546_1587207	1	2	0	0	1	0	0	0	12	91	108
FQ312003_intergenic_1588775_1588932	FQ312003_intergenic_1588775_1588932	FQ312003_intergenic_1588775_1588932	7	1	0	0	0	0	0	0	0	145	86
FQ312003_intergenic_1590041_1590083	FQ312003_intergenic_1590041_1590083	FQ312003_intergenic_1590041_1590083	0	0	0	0	0	0	0	0	0	7	18
FQ312003_intergenic_1592851_1592862	FQ312003_intergenic_1592851_1592862	FQ312003_intergenic_1592851_1592862	1	2	0	0	0	0	0	0	0	1	3
FQ312003_intergenic_1599405_1599432	FQ312003_intergenic_1599405_1599432	FQ312003_intergenic_1599405_1599432	1	0	0	0	0	0	0	0	1	10	19
FQ312003_intergenic_1600319_1600360	FQ312003_intergenic_1600319_1600360	FQ312003_intergenic_1600319_1600360	1	3	0	0	0	0	0	2	0	10	5
FQ312003_intergenic_1600791_1601039	FQ312003_intergenic_1600791_1601039	FQ312003_intergenic_1600791_1601039	1	0	0	0	1	3	0	3	7	701	684
FQ312003_intergenic_16012_16037	FQ312003_intergenic_16012_16037	FQ312003_intergenic_16012_16037	2	0	0	0	0	0	0	0	0	9	7
FQ312003_intergenic_1601572_1601983	FQ312003_intergenic_1601572_1601983	FQ312003_intergenic_1601572_1601983	1	2	0	2	0	0	2	0	3	478	245
FQ312003_intergenic_1602538_1602613	FQ312003_intergenic_1602538_1602613	FQ312003_intergenic_1602538_1602613	0	0	0	0	0	0	0	0	5	96	109
FQ312003_intergenic_1604412_1604677	FQ312003_intergenic_1604412_1604677	FQ312003_intergenic_1604412_1604677	4	2	0	1	2	0	2	0	3	83	78
FQ312003_intergenic_1610393_1610626	FQ312003_intergenic_1610393_1610626	FQ312003_intergenic_1610393_1610626	0	0	0	0	0	0	0	1	1	104	131
FQ312003_intergenic_1611552_1611936	FQ312003_intergenic_1611552_1611936	FQ312003_intergenic_1611552_1611936	3	4	4	4	0	2	0	0	7	5298	2423
FQ312003_intergenic_161449_161499	FQ312003_intergenic_161449_161499	FQ312003_intergenic_161449_161499	0	0	0	0	0	0	0	1	0	3	0
FQ312003_intergenic_1615201_1615216	FQ312003_intergenic_1615201_1615216	FQ312003_intergenic_1615201_1615216	1	0	0	0	0	0	0	0	0	11	9
FQ312003_intergenic_1615896_1616009	FQ312003_intergenic_1615896_1616009	FQ312003_intergenic_1615896_1616009	0	0	0	0	0	0	0	1	0	418	244
FQ312003_intergenic_161996_162216	FQ312003_intergenic_161996_162216	FQ312003_intergenic_161996_162216	4	0	2	2	0	4	2	0	2	132	263
FQ312003_intergenic_1626124_1626306	FQ312003_intergenic_1626124_1626306	FQ312003_intergenic_1626124_1626306	1	0	2	12	8	6	1	3	24	406	286
FQ312003_intergenic_1627040_1627451	FQ312003_intergenic_1627040_1627451	FQ312003_intergenic_1627040_1627451	0	2	2	1	0	0	4	0	4	149	72
FQ312003_intergenic_1629344_1629387	FQ312003_intergenic_1629344_1629387	FQ312003_intergenic_1629344_1629387	1	1	0	0	0	0	1	0	3	76	72
FQ312003_intergenic_1630550_1630712	FQ312003_intergenic_1630550_1630712	FQ312003_intergenic_1630550_1630712	0	0	0	0	0	2	0	0	0	100	89
FQ312003_intergenic_1633666_1633898	FQ312003_intergenic_1633666_1633898	FQ312003_intergenic_1633666_1633898	0	0	0	0	0	2	0	0	1	498	395
FQ312003_intergenic_1635070_1635147	FQ312003_intergenic_1635070_1635147	FQ312003_intergenic_1635070_1635147	0	0	0	0	0	0	0	0	0	12	6
FQ312003_intergenic_1636451_1636573	FQ312003_intergenic_1636451_1636573	FQ312003_intergenic_1636451_1636573	2	0	0	0	0	0	0	0	0	13	11
FQ312003_intergenic_163882_164006	FQ312003_intergenic_163882_164006	FQ312003_intergenic_163882_164006	1	1	0	1	2	1	0	0	2	316	208
FQ312003_intergenic_1643429_1643636	FQ312003_intergenic_1643429_1643636	FQ312003_intergenic_1643429_1643636	0	2	5	16	0	4	0	11	13	2631	2896
FQ312003_intergenic_1645183_1645196	FQ312003_intergenic_1645183_1645196	FQ312003_intergenic_1645183_1645196	1	0	0	1	0	3	0	1	3	21	41
FQ312003_intergenic_1646722_1646756	FQ312003_intergenic_1646722_1646756	FQ312003_intergenic_1646722_1646756	1	0	0	0	2	5	1	5	5	93	152
FQ312003_intergenic_1647628_1647785	FQ312003_intergenic_1647628_1647785	FQ312003_intergenic_1647628_1647785	4	2	0	3	4	0	0	2	10	405	305
FQ312003_intergenic_1648548_1648983	FQ312003_intergenic_1648548_1648983	FQ312003_intergenic_1648548_1648983	5	10	0	9	3	3	0	20	30	204	114
FQ312003_intergenic_1650035_1650207	FQ312003_intergenic_1650035_1650207	FQ312003_intergenic_1650035_1650207	2	0	2	3	3	1	0	4	3	87	112
FQ312003_intergenic_1655110_1655164	FQ312003_intergenic_1655110_1655164	FQ312003_intergenic_1655110_1655164	2	1	0	0	0	0	0	0	0	55	53
FQ312003_intergenic_1658485_1658600	FQ312003_intergenic_1658485_1658600	FQ312003_intergenic_1658485_1658600	2	1	0	0	0	1	2	1	0	132	110
FQ312003_intergenic_1662242_1662272	FQ312003_intergenic_1662242_1662272	FQ312003_intergenic_1662242_1662272	1	0	1	1	0	0	0	0	0	18	35
FQ312003_intergenic_1666535_1666629	FQ312003_intergenic_1666535_1666629	FQ312003_intergenic_1666535_1666629	1	0	0	0	0	0	0	0	0	38	47
FQ312003_intergenic_1668386_1668504	FQ312003_intergenic_1668386_1668504	FQ312003_intergenic_1668386_1668504	0	0	0	0	0	2	1	0	0	160	129
FQ312003_intergenic_1671506_1671697	FQ312003_intergenic_1671506_1671697	FQ312003_intergenic_1671506_1671697	2	0	0	0	0	2	0	0	5	75	81
FQ312003_intergenic_1674408_1674475	FQ312003_intergenic_1674408_1674475	FQ312003_intergenic_1674408_1674475	0	1	0	0	1	1	0	0	0	1	6
FQ312003_intergenic_1676002_1676423	FQ312003_intergenic_1676002_1676423	FQ312003_intergenic_1676002_1676423	2	2	0	3	1	0	0	0	6	633	262
FQ312003_intergenic_1676926_1676953	FQ312003_intergenic_1676926_1676953	FQ312003_intergenic_1676926_1676953	1	0	0	0	0	0	1	1	1	382	162
FQ312003_intergenic_1677771_1678095	FQ312003_intergenic_1677771_1678095	FQ312003_intergenic_1677771_1678095	2	1	2	6	2	6	1	3	8	21	20
FQ312003_intergenic_1679423_1679442	FQ312003_intergenic_1679423_1679442	FQ312003_intergenic_1679423_1679442	1	0	0	0	0	1	0	0	1	64	32
FQ312003_intergenic_1679888_1680693	FQ312003_intergenic_1679888_1680693	FQ312003_intergenic_1679888_1680693	6	6	6	10	8	10	0	1	17	141	138
FQ312003_intergenic_168206_168326	FQ312003_intergenic_168206_168326	FQ312003_intergenic_168206_168326	3	0	0	0	0	0	0	0	0	20	36
FQ312003_intergenic_1683643_1683678	FQ312003_intergenic_1683643_1683678	FQ312003_intergenic_1683643_1683678	1	0	0	0	0	0	0	0	0	24	19
FQ312003_intergenic_1685330_1685692	FQ312003_intergenic_1685330_1685692	FQ312003_intergenic_1685330_1685692	2	0	1	4	0	0	2	0	3	143	53
FQ312003_intergenic_1686456_1686625	FQ312003_intergenic_1686456_1686625	FQ312003_intergenic_1686456_1686625	1	1	1	3	0	0	0	2	3	80	232
FQ312003_intergenic_1687257_1687272	FQ312003_intergenic_1687257_1687272	FQ312003_intergenic_1687257_1687272	0	2	0	0	0	0	1	0	0	10	8
FQ312003_intergenic_169174_169307	FQ312003_intergenic_169174_169307	FQ312003_intergenic_169174_169307	5	0	1	0	0	2	2	2	1	362	363
FQ312003_intergenic_1692140_1692239	FQ312003_intergenic_1692140_1692239	FQ312003_intergenic_1692140_1692239	5	1	0	0	0	0	1	0	1	96	66
FQ312003_intergenic_1693392_1693433	FQ312003_intergenic_1693392_1693433	FQ312003_intergenic_1693392_1693433	0	0	0	2	0	0	0	0	1	71	64
FQ312003_intergenic_1696693_1696831	FQ312003_intergenic_1696693_1696831	FQ312003_intergenic_1696693_1696831	5	3	0	7	7	14	3	6	10	590	475
FQ312003_intergenic_1702553_1702933	FQ312003_intergenic_1702553_1702933	FQ312003_intergenic_1702553_1702933	4	0	0	0	0	0	0	1	4	96	94
FQ312003_intergenic_1706565_1706950	FQ312003_intergenic_1706565_1706950	FQ312003_intergenic_1706565_1706950	2	2	0	6	3	5	1	8	28	4962	3774
FQ312003_intergenic_1708035_1708079	FQ312003_intergenic_1708035_1708079	FQ312003_intergenic_1708035_1708079	0	0	0	0	0	0	0	0	0	25	48
FQ312003_intergenic_1709335_1709644	FQ312003_intergenic_1709335_1709644	FQ312003_intergenic_1709335_1709644	0	0	0	0	0	0	0	0	2	250	348
FQ312003_intergenic_1710309_1710465	FQ312003_intergenic_1710309_1710465	FQ312003_intergenic_1710309_1710465	4	0	0	0	1	0	0	0	2	180	163
FQ312003_intergenic_1711082_1711176	FQ312003_intergenic_1711082_1711176	FQ312003_intergenic_1711082_1711176	2	2	0	1	0	0	0	0	2	237	213
FQ312003_intergenic_1712030_1712079	FQ312003_intergenic_1712030_1712079	FQ312003_intergenic_1712030_1712079	2	1	0	2	0	0	0	1	0	624	986
FQ312003_intergenic_1713437_1713574	FQ312003_intergenic_1713437_1713574	FQ312003_intergenic_1713437_1713574	2	4	0	0	2	0	0	0	0	211	92
FQ312003_intergenic_1716125_1716495	FQ312003_intergenic_1716125_1716495	FQ312003_intergenic_1716125_1716495	4	2	0	0	2	0	0	0	5	878	643
FQ312003_intergenic_1721006_1721198	FQ312003_intergenic_1721006_1721198	FQ312003_intergenic_1721006_1721198	0	0	0	0	0	0	0	0	0	5	5
FQ312003_intergenic_1722158_1722444	FQ312003_intergenic_1722158_1722444	FQ312003_intergenic_1722158_1722444	7	1	0	0	0	0	1	0	1	67	56
FQ312003_intergenic_1723658_1723770	FQ312003_intergenic_1723658_1723770	FQ312003_intergenic_1723658_1723770	3	3	5	6	7	6	1	3	16	662	831
FQ312003_intergenic_1726578_1726750	FQ312003_intergenic_1726578_1726750	FQ312003_intergenic_1726578_1726750	0	0	0	0	0	0	1	0	0	157	142
FQ312003_intergenic_1727757_1727774	FQ312003_intergenic_1727757_1727774	FQ312003_intergenic_1727757_1727774	1	0	0	0	0	0	0	0	0	6	5
FQ312003_intergenic_1730515_1730603	FQ312003_intergenic_1730515_1730603	FQ312003_intergenic_1730515_1730603	0	0	0	3	2	0	0	1	7	84	65
FQ312003_intergenic_1732373_1732387	FQ312003_intergenic_1732373_1732387	FQ312003_intergenic_1732373_1732387	0	0	0	0	1	0	0	0	0	236	259
FQ312003_intergenic_173271_173333	FQ312003_intergenic_173271_173333	FQ312003_intergenic_173271_173333	3	1	0	0	0	0	1	0	0	12	3
FQ312003_intergenic_1734626_1734672	FQ312003_intergenic_1734626_1734672	FQ312003_intergenic_1734626_1734672	0	0	0	0	0	0	0	0	0	4	11
FQ312003_intergenic_1737235_1737276	FQ312003_intergenic_1737235_1737276	FQ312003_intergenic_1737235_1737276	2	0	0	0	0	0	0	0	0	143	134
FQ312003_intergenic_1739320_1739389	FQ312003_intergenic_1739320_1739389	FQ312003_intergenic_1739320_1739389	1	0	0	0	0	0	0	0	0	7	12
FQ312003_intergenic_1742232_1742298	FQ312003_intergenic_1742232_1742298	FQ312003_intergenic_1742232_1742298	3	0	0	0	0	0	0	0	0	23	50
FQ312003_intergenic_1746594_1746959	FQ312003_intergenic_1746594_1746959	FQ312003_intergenic_1746594_1746959	2	3	0	2	2	8	0	2	9	67	45
FQ312003_intergenic_174808_175269	FQ312003_intergenic_174808_175269	FQ312003_intergenic_174808_175269	3	7	2	2	0	3	3	2	5	687	454
FQ312003_intergenic_1748922_1748938	FQ312003_intergenic_1748922_1748938	FQ312003_intergenic_1748922_1748938	1	0	2	0	0	0	0	0	0	69	33
FQ312003_intergenic_1749828_1749926	FQ312003_intergenic_1749828_1749926	FQ312003_intergenic_1749828_1749926	3	0	0	2	1	0	2	0	5	87	195
FQ312003_intergenic_1753184_1753344	FQ312003_intergenic_1753184_1753344	FQ312003_intergenic_1753184_1753344	1	0	2	0	1	0	2	0	0	64	43
FQ312003_intergenic_17537_17816	FQ312003_intergenic_17537_17816	FQ312003_intergenic_17537_17816	2	1	0	0	0	0	0	0	0	33	16
FQ312003_intergenic_1756568_1756725	FQ312003_intergenic_1756568_1756725	FQ312003_intergenic_1756568_1756725	1	0	0	4	0	0	0	3	0	446	421
FQ312003_intergenic_1757045_1757063	FQ312003_intergenic_1757045_1757063	FQ312003_intergenic_1757045_1757063	3	0	0	0	0	0	0	0	0	26	30
FQ312003_intergenic_1758228_1758317	FQ312003_intergenic_1758228_1758317	FQ312003_intergenic_1758228_1758317	1	0	0	0	0	0	0	0	0	44	65
FQ312003_intergenic_1759903_1759951	FQ312003_intergenic_1759903_1759951	FQ312003_intergenic_1759903_1759951	0	0	1	1	0	0	0	0	1	85	45
FQ312003_intergenic_1760817_1760911	FQ312003_intergenic_1760817_1760911	FQ312003_intergenic_1760817_1760911	3	0	0	1	2	0	0	0	0	49	49
FQ312003_intergenic_176135_176193	FQ312003_intergenic_176135_176193	FQ312003_intergenic_176135_176193	1	0	1	0	0	1	0	0	2	38	72
FQ312003_intergenic_1764334_1765209	FQ312003_intergenic_1764334_1765209	FQ312003_intergenic_1764334_1765209	6	10	16	30	15	29	16	50	125	8272	5481
FQ312003_intergenic_1766285_1766594	FQ312003_intergenic_1766285_1766594	FQ312003_intergenic_1766285_1766594	4	0	0	0	0	0	0	0	4	173	103
FQ312003_intergenic_1769293_1769594	FQ312003_intergenic_1769293_1769594	FQ312003_intergenic_1769293_1769594	2	0	2	2	1	6	2	0	0	273	251
FQ312003_intergenic_1771035_1771171	FQ312003_intergenic_1771035_1771171	FQ312003_intergenic_1771035_1771171	2	0	0	0	0	0	0	0	4	77	34
FQ312003_intergenic_1775193_1775352	FQ312003_intergenic_1775193_1775352	FQ312003_intergenic_1775193_1775352	3	7	0	0	0	0	0	0	0	35	33
FQ312003_intergenic_1781982_1782360	FQ312003_intergenic_1781982_1782360	FQ312003_intergenic_1781982_1782360	2	2	0	0	2	0	2	0	4	120	109
FQ312003_intergenic_1785435_1785671	FQ312003_intergenic_1785435_1785671	FQ312003_intergenic_1785435_1785671	1	2	0	0	0	0	0	0	2	52	47
FQ312003_intergenic_1787542_1787601	FQ312003_intergenic_1787542_1787601	FQ312003_intergenic_1787542_1787601	2	1	0	1	1	0	0	1	0	26	40
FQ312003_intergenic_1788892_1789014	FQ312003_intergenic_1788892_1789014	FQ312003_intergenic_1788892_1789014	1	2	0	0	0	0	0	0	1	81	76
FQ312003_intergenic_1789412_1789670	FQ312003_intergenic_1789412_1789670	FQ312003_intergenic_1789412_1789670	4	2	0	2	2	2	4	2	9	446	503
FQ312003_intergenic_1796390_1796410	FQ312003_intergenic_1796390_1796410	FQ312003_intergenic_1796390_1796410	0	0	0	3	0	2	0	0	2	43	36
FQ312003_intergenic_1798525_1798806	FQ312003_intergenic_1798525_1798806	FQ312003_intergenic_1798525_1798806	4	1	0	1	0	0	0	2	1	425	196
FQ312003_intergenic_1799555_1799930	FQ312003_intergenic_1799555_1799930	FQ312003_intergenic_1799555_1799930	2	0	0	0	3	4	0	1	3	1904	1075
FQ312003_intergenic_1802710_1802805	FQ312003_intergenic_1802710_1802805	FQ312003_intergenic_1802710_1802805	0	0	0	0	0	1	0	2	1	65	174
FQ312003_intergenic_1803524_1804085	FQ312003_intergenic_1803524_1804085	FQ312003_intergenic_1803524_1804085	7	0	0	0	0	0	0	2	4	513	393
FQ312003_intergenic_1804600_1804630	FQ312003_intergenic_1804600_1804630	FQ312003_intergenic_1804600_1804630	0	0	0	1	0	0	0	0	0	0	3
FQ312003_intergenic_1805640_1805741	FQ312003_intergenic_1805640_1805741	FQ312003_intergenic_1805640_1805741	0	0	0	0	0	0	0	0	2	297	274
FQ312003_intergenic_180862_180960	FQ312003_intergenic_180862_180960	FQ312003_intergenic_180862_180960	7	2	2	3	4	3	2	7	6	591	593
FQ312003_intergenic_1809314_1810528	FQ312003_intergenic_1809314_1810528	FQ312003_intergenic_1809314_1810528	17	7	2	18	10	5	42	16	30	3259	3046
FQ312003_intergenic_1812105_1812299	FQ312003_intergenic_1812105_1812299	FQ312003_intergenic_1812105_1812299	0	0	0	0	0	0	0	0	0	202	197
FQ312003_intergenic_1819060_1819346	FQ312003_intergenic_1819060_1819346	FQ312003_intergenic_1819060_1819346	1	0	2	0	0	0	0	0	1	79	74
FQ312003_intergenic_1820845_1821084	FQ312003_intergenic_1820845_1821084	FQ312003_intergenic_1820845_1821084	0	1	0	0	0	0	0	2	1	32	32
FQ312003_intergenic_182486_182673	FQ312003_intergenic_182486_182673	FQ312003_intergenic_182486_182673	5	0	0	0	1	0	0	0	0	37	18
FQ312003_intergenic_1825050_1825125	FQ312003_intergenic_1825050_1825125	FQ312003_intergenic_1825050_1825125	0	1	0	0	0	0	1	1	1	118	140
FQ312003_intergenic_1825890_1826055	FQ312003_intergenic_1825890_1826055	FQ312003_intergenic_1825890_1826055	2	0	0	0	0	1	0	0	0	129	112
FQ312003_intergenic_1832614_1832826	FQ312003_intergenic_1832614_1832826	FQ312003_intergenic_1832614_1832826	1	0	0	0	2	0	0	0	0	696	522
FQ312003_intergenic_1834399_1834563	FQ312003_intergenic_1834399_1834563	FQ312003_intergenic_1834399_1834563	0	0	2	2	3	7	2	18	36	3540	7188
FQ312003_intergenic_1835612_1835659	FQ312003_intergenic_1835612_1835659	FQ312003_intergenic_1835612_1835659	1	1	0	0	0	0	1	0	1	29	63
FQ312003_intergenic_1837745_1837919	FQ312003_intergenic_1837745_1837919	FQ312003_intergenic_1837745_1837919	0	0	2	0	0	0	0	0	3	211	131
FQ312003_intergenic_1838605_1838620	FQ312003_intergenic_1838605_1838620	FQ312003_intergenic_1838605_1838620	2	0	0	0	0	0	0	0	1	95	111
FQ312003_intergenic_1839813_1839870	FQ312003_intergenic_1839813_1839870	FQ312003_intergenic_1839813_1839870	0	0	0	0	1	2	0	0	0	7	14
FQ312003_intergenic_1841237_1841630	FQ312003_intergenic_1841237_1841630	FQ312003_intergenic_1841237_1841630	4	0	0	0	0	0	1	0	3	237	136
FQ312003_intergenic_1850091_1850333	FQ312003_intergenic_1850091_1850333	FQ312003_intergenic_1850091_1850333	2	0	0	0	0	0	0	0	4	344	241
FQ312003_intergenic_1851760_1851872	FQ312003_intergenic_1851760_1851872	FQ312003_intergenic_1851760_1851872	0	2	0	0	0	0	0	0	0	94	98
FQ312003_intergenic_1854003_1854070	FQ312003_intergenic_1854003_1854070	FQ312003_intergenic_1854003_1854070	2	0	0	0	0	0	0	0	0	17	18
FQ312003_intergenic_185515_185802	FQ312003_intergenic_185515_185802	FQ312003_intergenic_185515_185802	0	0	0	0	0	0	2	3	5	899	761
FQ312003_intergenic_1855531_1855600	FQ312003_intergenic_1855531_1855600	FQ312003_intergenic_1855531_1855600	4	2	0	0	0	0	0	0	0	26	32
FQ312003_intergenic_1860891_1861118	FQ312003_intergenic_1860891_1861118	FQ312003_intergenic_1860891_1861118	0	0	0	0	0	0	2	0	0	122	97
FQ312003_intergenic_1863512_1863630	FQ312003_intergenic_1863512_1863630	FQ312003_intergenic_1863512_1863630	5	0	0	0	0	0	1	0	0	67	62
FQ312003_intergenic_1865276_1865316	FQ312003_intergenic_1865276_1865316	FQ312003_intergenic_1865276_1865316	1	0	0	0	0	0	7	0	0	35	44
FQ312003_intergenic_1866643_1866733	FQ312003_intergenic_1866643_1866733	FQ312003_intergenic_1866643_1866733	1	0	0	0	1	0	0	0	1	97	90
FQ312003_intergenic_1866972_1867222	FQ312003_intergenic_1866972_1867222	FQ312003_intergenic_1866972_1867222	3	0	0	3	1	4	2	1	4	544	545
FQ312003_intergenic_1870804_1870824	FQ312003_intergenic_1870804_1870824	FQ312003_intergenic_1870804_1870824	1	0	0	0	0	0	0	0	0	1	2
FQ312003_intergenic_1872053_1872087	FQ312003_intergenic_1872053_1872087	FQ312003_intergenic_1872053_1872087	0	0	0	0	0	0	1	0	0	4	9
FQ312003_intergenic_1872647_1872736	FQ312003_intergenic_1872647_1872736	FQ312003_intergenic_1872647_1872736	0	0	0	0	0	0	0	2	0	4	7
FQ312003_intergenic_1874523_1874626	FQ312003_intergenic_1874523_1874626	FQ312003_intergenic_1874523_1874626	2	0	0	0	0	0	0	0	0	52	26
FQ312003_intergenic_1878044_1878073	FQ312003_intergenic_1878044_1878073	FQ312003_intergenic_1878044_1878073	0	0	0	0	0	0	0	0	1	6	4
FQ312003_intergenic_1880731_1880893	FQ312003_intergenic_1880731_1880893	FQ312003_intergenic_1880731_1880893	0	0	0	0	0	0	13	0	6	62	77
FQ312003_intergenic_1882359_1882395	FQ312003_intergenic_1882359_1882395	FQ312003_intergenic_1882359_1882395	2	0	0	0	0	1	1	0	2	12	36
FQ312003_intergenic_1885679_1886050	FQ312003_intergenic_1885679_1886050	FQ312003_intergenic_1885679_1886050	0	0	0	1	2	3	5	2	6	336	376
FQ312003_intergenic_1889353_1889661	FQ312003_intergenic_1889353_1889661	FQ312003_intergenic_1889353_1889661	2	0	0	0	0	0	0	0	2	304	182
FQ312003_intergenic_1892946_1893064	FQ312003_intergenic_1892946_1893064	FQ312003_intergenic_1892946_1893064	4	0	0	0	1	0	1	0	6	224	141
FQ312003_intergenic_1893531_1894078	FQ312003_intergenic_1893531_1894078	FQ312003_intergenic_1893531_1894078	10	2	5	8	6	11	1	9	29	1867	1768
FQ312003_intergenic_189404_189548	FQ312003_intergenic_189404_189548	FQ312003_intergenic_189404_189548	1	2	0	0	0	0	0	0	1	1526	884
FQ312003_intergenic_1894681_1894737	FQ312003_intergenic_1894681_1894737	FQ312003_intergenic_1894681_1894737	1	1	0	0	0	0	0	0	2	175	43
FQ312003_intergenic_1895078_1895188	FQ312003_intergenic_1895078_1895188	FQ312003_intergenic_1895078_1895188	0	0	0	0	0	0	0	0	0	140	117
FQ312003_intergenic_1896081_1896155	FQ312003_intergenic_1896081_1896155	FQ312003_intergenic_1896081_1896155	3	1	0	0	0	2	2	0	0	57	34
FQ312003_intergenic_1898559_1898651	FQ312003_intergenic_1898559_1898651	FQ312003_intergenic_1898559_1898651	0	0	0	1	0	0	0	0	0	30	31
FQ312003_intergenic_190012_190145	FQ312003_intergenic_190012_190145	FQ312003_intergenic_190012_190145	1	1	0	2	0	0	3	0	2	69	48
FQ312003_intergenic_1907633_1907646	FQ312003_intergenic_1907633_1907646	FQ312003_intergenic_1907633_1907646	0	0	0	0	0	0	0	0	0	28	28
FQ312003_intergenic_1908958_1909080	FQ312003_intergenic_1908958_1909080	FQ312003_intergenic_1908958_1909080	3	1	0	0	0	0	0	3	4	37	52
FQ312003_intergenic_1909346_1909529	FQ312003_intergenic_1909346_1909529	FQ312003_intergenic_1909346_1909529	3	2	0	1	2	4	0	1	2	238	101
FQ312003_intergenic_1910353_1910935	FQ312003_intergenic_1910353_1910935	FQ312003_intergenic_1910353_1910935	5	2	0	0	1	0	2	0	2	145	39
FQ312003_intergenic_1911432_1911660	FQ312003_intergenic_1911432_1911660	FQ312003_intergenic_1911432_1911660	1	1	0	0	0	0	3	1	0	238	120
FQ312003_intergenic_1912238_1912524	FQ312003_intergenic_1912238_1912524	FQ312003_intergenic_1912238_1912524	4	0	0	2	2	4	0	5	7	892	611
FQ312003_intergenic_1913045_1913313	FQ312003_intergenic_1913045_1913313	FQ312003_intergenic_1913045_1913313	2	2	0	0	0	0	41	2	3	347	544
FQ312003_intergenic_1913684_1913748	FQ312003_intergenic_1913684_1913748	FQ312003_intergenic_1913684_1913748	1	1	0	2	3	5	0	1	9	426	323
FQ312003_intergenic_1915330_1915352	FQ312003_intergenic_1915330_1915352	FQ312003_intergenic_1915330_1915352	0	0	0	0	0	1	0	0	0	11	11
FQ312003_intergenic_1915822_1916206	FQ312003_intergenic_1915822_1916206	FQ312003_intergenic_1915822_1916206	4	0	0	0	0	0	0	0	2	2222	1147
FQ312003_intergenic_1916508_1917024	FQ312003_intergenic_1916508_1917024	FQ312003_intergenic_1916508_1917024	2	4	0	0	0	1	0	0	0	174	166
FQ312003_intergenic_1918040_1918071	FQ312003_intergenic_1918040_1918071	FQ312003_intergenic_1918040_1918071	0	0	0	5	0	1	0	2	4	158	53
FQ312003_intergenic_1918955_1919180	FQ312003_intergenic_1918955_1919180	FQ312003_intergenic_1918955_1919180	0	0	2	9	0	3	0	3	6	96	89
FQ312003_intergenic_1919428_1919606	FQ312003_intergenic_1919428_1919606	FQ312003_intergenic_1919428_1919606	1	4	5	22	6	20	0	20	22	397	194
FQ312003_intergenic_1919890_1920126	FQ312003_intergenic_1919890_1920126	FQ312003_intergenic_1919890_1920126	2	1	1	1	2	3	3	1	8	830	413
FQ312003_intergenic_1920350_1920696	FQ312003_intergenic_1920350_1920696	FQ312003_intergenic_1920350_1920696	4	2	0	2	2	7	0	3	9	286	164
FQ312003_intergenic_1921976_1922029	FQ312003_intergenic_1921976_1922029	FQ312003_intergenic_1921976_1922029	0	0	0	0	0	0	1	0	4	300	361
FQ312003_intergenic_1922394_1922600	FQ312003_intergenic_1922394_1922600	FQ312003_intergenic_1922394_1922600	6	0	0	0	0	2	0	0	2	394	278
FQ312003_intergenic_1922869_1923024	FQ312003_intergenic_1922869_1923024	FQ312003_intergenic_1922869_1923024	0	0	0	3	2	4	0	11	11	98	138
FQ312003_intergenic_1925541_1925813	FQ312003_intergenic_1925541_1925813	FQ312003_intergenic_1925541_1925813	1	0	0	6	1	0	2	4	2	744	964
FQ312003_intergenic_1927541_1927571	FQ312003_intergenic_1927541_1927571	FQ312003_intergenic_1927541_1927571	4	0	0	0	0	0	0	0	0	55	43
FQ312003_intergenic_1931475_1931586	FQ312003_intergenic_1931475_1931586	FQ312003_intergenic_1931475_1931586	5	0	0	0	0	5	0	3	0	163	89
FQ312003_intergenic_1933152_1933181	FQ312003_intergenic_1933152_1933181	FQ312003_intergenic_1933152_1933181	0	1	0	0	0	0	0	0	0	4	2
FQ312003_intergenic_1937051_1937184	FQ312003_intergenic_1937051_1937184	FQ312003_intergenic_1937051_1937184	0	0	0	0	1	0	4	0	0	11	5
FQ312003_intergenic_1938761_1939001	FQ312003_intergenic_1938761_1939001	FQ312003_intergenic_1938761_1939001	2	1	0	0	0	0	0	0	0	384	312
FQ312003_intergenic_1939972_1939994	FQ312003_intergenic_1939972_1939994	FQ312003_intergenic_1939972_1939994	0	1	0	0	0	1	0	1	1	249	249
FQ312003_intergenic_1942582_1942597	FQ312003_intergenic_1942582_1942597	FQ312003_intergenic_1942582_1942597	2	0	0	0	0	1	0	0	0	22	15
FQ312003_intergenic_1948303_1948534	FQ312003_intergenic_1948303_1948534	FQ312003_intergenic_1948303_1948534	0	2	0	0	0	2	4	1	0	150	116
FQ312003_intergenic_1950112_1950143	FQ312003_intergenic_1950112_1950143	FQ312003_intergenic_1950112_1950143	1	0	0	0	0	0	0	0	2	4	0
FQ312003_intergenic_1954501_1954724	FQ312003_intergenic_1954501_1954724	FQ312003_intergenic_1954501_1954724	5	0	4	4	0	3	0	0	5	222	168
FQ312003_intergenic_1958407_1958541	FQ312003_intergenic_1958407_1958541	FQ312003_intergenic_1958407_1958541	1	0	0	0	0	3	0	2	1	50	79
FQ312003_intergenic_1959978_1960113	FQ312003_intergenic_1959978_1960113	FQ312003_intergenic_1959978_1960113	5	2	0	0	2	0	0	0	0	56	37
FQ312003_intergenic_1961948_1962035	FQ312003_intergenic_1961948_1962035	FQ312003_intergenic_1961948_1962035	1	0	0	0	1	0	0	0	0	3	2
FQ312003_intergenic_196377_196477	FQ312003_intergenic_196377_196477	FQ312003_intergenic_196377_196477	1	2	0	0	0	1	0	0	1	139	158
FQ312003_intergenic_1965201_1965336	FQ312003_intergenic_1965201_1965336	FQ312003_intergenic_1965201_1965336	2	0	0	0	1	0	0	0	2	29	8
FQ312003_intergenic_1969052_1969144	FQ312003_intergenic_1969052_1969144	FQ312003_intergenic_1969052_1969144	6	1	0	0	0	0	0	0	2	9	17
FQ312003_intergenic_1972220_1972272	FQ312003_intergenic_1972220_1972272	FQ312003_intergenic_1972220_1972272	4	0	0	0	0	0	0	0	0	80	105
FQ312003_intergenic_1974035_1974170	FQ312003_intergenic_1974035_1974170	FQ312003_intergenic_1974035_1974170	4	0	0	1	0	0	2	0	0	181	88
FQ312003_intergenic_1978572_1978652	FQ312003_intergenic_1978572_1978652	FQ312003_intergenic_1978572_1978652	0	0	0	0	0	1	13	0	4	1352	1162
FQ312003_intergenic_1979685_1980370	FQ312003_intergenic_1979685_1980370	FQ312003_intergenic_1979685_1980370	3	4	1	6	2	0	2	6	17	6840	6047
FQ312003_intergenic_1983117_1983649	FQ312003_intergenic_1983117_1983649	FQ312003_intergenic_1983117_1983649	4	0	4	2	0	4	2	3	5	4713	1969
FQ312003_intergenic_1984308_1984757	FQ312003_intergenic_1984308_1984757	FQ312003_intergenic_1984308_1984757	3	0	0	0	0	3	1	0	2	1786	777
FQ312003_intergenic_1985362_1985439	FQ312003_intergenic_1985362_1985439	FQ312003_intergenic_1985362_1985439	2	0	0	0	0	0	0	0	3	15	39
FQ312003_intergenic_1986179_1986333	FQ312003_intergenic_1986179_1986333	FQ312003_intergenic_1986179_1986333	2	0	0	0	1	0	0	1	2	39	37
FQ312003_intergenic_1986770_1986908	FQ312003_intergenic_1986770_1986908	FQ312003_intergenic_1986770_1986908	0	4	0	0	0	0	1	0	0	62	38
FQ312003_intergenic_1987792_1987917	FQ312003_intergenic_1987792_1987917	FQ312003_intergenic_1987792_1987917	0	0	0	0	0	1	1	0	0	12	9
FQ312003_intergenic_1989970_1990106	FQ312003_intergenic_1989970_1990106	FQ312003_intergenic_1989970_1990106	0	0	0	2	2	2	2	7	7	344	431
FQ312003_intergenic_1990513_1990645	FQ312003_intergenic_1990513_1990645	FQ312003_intergenic_1990513_1990645	0	1	0	12	4	8	1	15	36	371	364
FQ312003_intergenic_1992186_1992297	FQ312003_intergenic_1992186_1992297	FQ312003_intergenic_1992186_1992297	1	2	1	2	0	6	0	0	7	369	219
FQ312003_intergenic_1992904_1993330	FQ312003_intergenic_1992904_1993330	FQ312003_intergenic_1992904_1993330	5	3	2	6	5	6	18	4	10	527	299
FQ312003_intergenic_1996522_1996884	FQ312003_intergenic_1996522_1996884	FQ312003_intergenic_1996522_1996884	0	0	0	0	2	2	0	2	1	1055	809
FQ312003_intergenic_1997999_1998129	FQ312003_intergenic_1997999_1998129	FQ312003_intergenic_1997999_1998129	1	0	0	0	0	0	0	0	0	229	150
FQ312003_intergenic_2000655_2000707	FQ312003_intergenic_2000655_2000707	FQ312003_intergenic_2000655_2000707	2	0	0	0	1	0	1	0	0	74	67
FQ312003_intergenic_2001609_2001654	FQ312003_intergenic_2001609_2001654	FQ312003_intergenic_2001609_2001654	0	1	0	0	0	0	0	1	1	248	207
FQ312003_intergenic_2003085_2003252	FQ312003_intergenic_2003085_2003252	FQ312003_intergenic_2003085_2003252	4	0	0	0	0	0	0	0	3	16	27
FQ312003_intergenic_2003863_2003891	FQ312003_intergenic_2003863_2003891	FQ312003_intergenic_2003863_2003891	2	0	0	0	0	0	0	1	2	6	4
FQ312003_intergenic_200657_200761	FQ312003_intergenic_200657_200761	FQ312003_intergenic_200657_200761	0	3	0	0	1	0	0	0	0	42	23
FQ312003_intergenic_2006764_2006919	FQ312003_intergenic_2006764_2006919	FQ312003_intergenic_2006764_2006919	5	2	0	0	2	0	2	0	3	939	784
FQ312003_intergenic_2011235_2011259	FQ312003_intergenic_2011235_2011259	FQ312003_intergenic_2011235_2011259	1	0	0	0	0	0	0	0	0	18	13
FQ312003_intergenic_2012856_2013019	FQ312003_intergenic_2012856_2013019	FQ312003_intergenic_2012856_2013019	0	1	0	0	0	2	3	0	0	257	50
FQ312003_intergenic_2013507_2013525	FQ312003_intergenic_2013507_2013525	FQ312003_intergenic_2013507_2013525	4	0	0	0	0	0	0	0	1	34	13
FQ312003_intergenic_2013941_2014056	FQ312003_intergenic_2013941_2014056	FQ312003_intergenic_2013941_2014056	0	1	0	0	0	0	0	2	0	39	44
FQ312003_intergenic_2024764_2024944	FQ312003_intergenic_2024764_2024944	FQ312003_intergenic_2024764_2024944	2	0	0	0	0	0	0	0	0	25	26
FQ312003_intergenic_2025902_2025929	FQ312003_intergenic_2025902_2025929	FQ312003_intergenic_2025902_2025929	0	0	0	0	0	0	1	0	0	65	46
FQ312003_intergenic_2026258_2026466	FQ312003_intergenic_2026258_2026466	FQ312003_intergenic_2026258_2026466	0	3	0	2	2	2	1	2	3	238	203
FQ312003_intergenic_2029074_2029137	FQ312003_intergenic_2029074_2029137	FQ312003_intergenic_2029074_2029137	2	0	0	0	0	0	0	2	3	20	42
FQ312003_intergenic_2030412_2030486	FQ312003_intergenic_2030412_2030486	FQ312003_intergenic_2030412_2030486	2	0	0	0	0	0	0	0	0	9	4
FQ312003_intergenic_2034538_2035086	FQ312003_intergenic_2034538_2035086	FQ312003_intergenic_2034538_2035086	8	2	0	1	0	0	2	0	4	131	76
FQ312003_intergenic_2036384_2036742	FQ312003_intergenic_2036384_2036742	FQ312003_intergenic_2036384_2036742	5	1	0	0	2	2	0	0	6	561	293
FQ312003_intergenic_2037056_2037409	FQ312003_intergenic_2037056_2037409	FQ312003_intergenic_2037056_2037409	1	0	0	0	2	1	0	4	13	535	350
FQ312003_intergenic_2039201_2039226	FQ312003_intergenic_2039201_2039226	FQ312003_intergenic_2039201_2039226	0	0	0	1	0	0	1	0	1	46	19
FQ312003_intergenic_203921_203936	FQ312003_intergenic_203921_203936	FQ312003_intergenic_203921_203936	0	0	0	0	0	0	1	0	0	16	11
FQ312003_intergenic_2039709_2040021	FQ312003_intergenic_2039709_2040021	FQ312003_intergenic_2039709_2040021	8	4	0	7	7	6	1	14	24	3369	3273
FQ312003_intergenic_2040314_2040452	FQ312003_intergenic_2040314_2040452	FQ312003_intergenic_2040314_2040452	1	0	0	0	0	2	1	0	1	339	139
FQ312003_intergenic_2041561_2041744	FQ312003_intergenic_2041561_2041744	FQ312003_intergenic_2041561_2041744	0	2	2	3	2	2	0	4	13	42	54
FQ312003_intergenic_2053195_2053251	FQ312003_intergenic_2053195_2053251	FQ312003_intergenic_2053195_2053251	2	0	0	0	0	0	1	0	0	5	7
FQ312003_intergenic_2058461_2058553	FQ312003_intergenic_2058461_2058553	FQ312003_intergenic_2058461_2058553	4	0	0	0	1	0	0	0	1	4	5
FQ312003_intergenic_2060888_2060903	FQ312003_intergenic_2060888_2060903	FQ312003_intergenic_2060888_2060903	2	0	1	0	0	0	0	2	0	8	11
FQ312003_intergenic_2061718_2061836	FQ312003_intergenic_2061718_2061836	FQ312003_intergenic_2061718_2061836	2	0	0	1	0	0	0	0	2	137	141
FQ312003_intergenic_2062357_2062468	FQ312003_intergenic_2062357_2062468	FQ312003_intergenic_2062357_2062468	0	0	0	0	0	0	1	0	1	22	24
FQ312003_intergenic_2064013_2064437	FQ312003_intergenic_2064013_2064437	FQ312003_intergenic_2064013_2064437	8	2	2	8	7	6	2	4	15	1076	896
FQ312003_intergenic_2067465_2067721	FQ312003_intergenic_2067465_2067721	FQ312003_intergenic_2067465_2067721	9	4	0	0	0	0	2	0	1	20	19
FQ312003_intergenic_2070018_2070134	FQ312003_intergenic_2070018_2070134	FQ312003_intergenic_2070018_2070134	0	0	0	0	0	0	0	0	3	3	8
FQ312003_intergenic_2072100_2072193	FQ312003_intergenic_2072100_2072193	FQ312003_intergenic_2072100_2072193	1	0	0	0	0	0	1	2	1	36	26
FQ312003_intergenic_2072990_2073484	FQ312003_intergenic_2072990_2073484	FQ312003_intergenic_2072990_2073484	4	1	2	0	0	0	7	0	3	74	53
FQ312003_intergenic_2075061_2075096	FQ312003_intergenic_2075061_2075096	FQ312003_intergenic_2075061_2075096	0	0	1	0	0	0	0	0	0	5	7
FQ312003_intergenic_2075737_2075933	FQ312003_intergenic_2075737_2075933	FQ312003_intergenic_2075737_2075933	0	0	0	0	0	0	5	0	0	21	12
FQ312003_intergenic_2079825_2080015	FQ312003_intergenic_2079825_2080015	FQ312003_intergenic_2079825_2080015	2	1	0	2	1	2	0	3	10	2314	4945
FQ312003_intergenic_2080914_2081184	FQ312003_intergenic_2080914_2081184	FQ312003_intergenic_2080914_2081184	0	0	0	0	2	0	0	0	12	1363	1022
FQ312003_intergenic_2081576_2082122	FQ312003_intergenic_2081576_2082122	FQ312003_intergenic_2081576_2082122	8	2	0	0	1	0	28	0	4	251	171
FQ312003_intergenic_2083870_2084111	FQ312003_intergenic_2083870_2084111	FQ312003_intergenic_2083870_2084111	5	0	0	0	0	0	0	0	0	14	7
FQ312003_intergenic_2088168_2088600	FQ312003_intergenic_2088168_2088600	FQ312003_intergenic_2088168_2088600	19	0	0	0	1	4	0	2	2	1848	1912
FQ312003_intergenic_2088956_2088971	FQ312003_intergenic_2088956_2088971	FQ312003_intergenic_2088956_2088971	0	0	2	0	0	0	0	0	0	21	23
FQ312003_intergenic_208969_209238	FQ312003_intergenic_208969_209238	FQ312003_intergenic_208969_209238	4	0	0	0	2	0	2	0	2	216	88
FQ312003_intergenic_2090527_2090621	FQ312003_intergenic_2090527_2090621	FQ312003_intergenic_2090527_2090621	0	0	0	0	0	0	1	2	0	423	523
FQ312003_intergenic_2091429_2091653	FQ312003_intergenic_2091429_2091653	FQ312003_intergenic_2091429_2091653	1	2	0	2	0	1	0	0	12	770	416
FQ312003_intergenic_2091922_2092041	FQ312003_intergenic_2091922_2092041	FQ312003_intergenic_2091922_2092041	2	0	0	2	0	1	0	2	3	573	585
FQ312003_intergenic_2093600_2093960	FQ312003_intergenic_2093600_2093960	FQ312003_intergenic_2093600_2093960	6	2	2	4	2	8	15	9	11	10641	8712
FQ312003_intergenic_2111567_2112063	FQ312003_intergenic_2111567_2112063	FQ312003_intergenic_2111567_2112063	2	1	0	2	4	0	8	4	9	405	339
FQ312003_intergenic_2112929_2113191	FQ312003_intergenic_2112929_2113191	FQ312003_intergenic_2112929_2113191	2	2	0	0	1	0	0	2	1	263	162
FQ312003_intergenic_2114087_2114510	FQ312003_intergenic_2114087_2114510	FQ312003_intergenic_2114087_2114510	1	0	0	0	0	1	0	0	0	186	111
FQ312003_intergenic_212407_212431	FQ312003_intergenic_212407_212431	FQ312003_intergenic_212407_212431	1	0	0	0	0	0	0	0	2	30	87
FQ312003_intergenic_2131749_2131892	FQ312003_intergenic_2131749_2131892	FQ312003_intergenic_2131749_2131892	7	1	0	11	1	5	0	14	14	5742	3467
FQ312003_intergenic_2133052_2133069	FQ312003_intergenic_2133052_2133069	FQ312003_intergenic_2133052_2133069	1	1	0	1	0	0	0	1	0	154	118
FQ312003_intergenic_213324_213343	FQ312003_intergenic_213324_213343	FQ312003_intergenic_213324_213343	0	0	0	0	0	0	0	2	6	16	51
FQ312003_intergenic_2133638_2133689	FQ312003_intergenic_2133638_2133689	FQ312003_intergenic_2133638_2133689	2	0	0	0	0	0	0	0	0	23	17
FQ312003_intergenic_2134963_2134985	FQ312003_intergenic_2134963_2134985	FQ312003_intergenic_2134963_2134985	1	0	0	0	0	0	0	0	0	20	44
FQ312003_intergenic_2138717_2138860	FQ312003_intergenic_2138717_2138860	FQ312003_intergenic_2138717_2138860	3	2	0	0	0	0	0	0	2	43	27
FQ312003_intergenic_2139069_2139234	FQ312003_intergenic_2139069_2139234	FQ312003_intergenic_2139069_2139234	2	5	0	0	2	0	0	0	1	955	275
FQ312003_intergenic_2141684_2141925	FQ312003_intergenic_2141684_2141925	FQ312003_intergenic_2141684_2141925	3	1	0	0	0	2	1	2	5	2000	953
FQ312003_intergenic_2143457_2143491	FQ312003_intergenic_2143457_2143491	FQ312003_intergenic_2143457_2143491	0	0	0	0	0	1	0	0	1	8	46
FQ312003_intergenic_2144957_2145135	FQ312003_intergenic_2144957_2145135	FQ312003_intergenic_2144957_2145135	4	1	0	2	0	1	0	1	1	454	400
FQ312003_intergenic_2147021_2147279	FQ312003_intergenic_2147021_2147279	FQ312003_intergenic_2147021_2147279	0	0	0	0	0	2	0	2	3	148	138
FQ312003_intergenic_215339_215378	FQ312003_intergenic_215339_215378	FQ312003_intergenic_215339_215378	0	0	0	0	0	0	1	0	1	196	115
FQ312003_intergenic_2155581_2155622	FQ312003_intergenic_2155581_2155622	FQ312003_intergenic_2155581_2155622	0	0	0	0	0	0	0	0	0	94	64
FQ312003_intergenic_2156890_2157025	FQ312003_intergenic_2156890_2157025	FQ312003_intergenic_2156890_2157025	0	0	0	0	2	2	0	0	3	72	51
FQ312003_intergenic_2158533_2158595	FQ312003_intergenic_2158533_2158595	FQ312003_intergenic_2158533_2158595	0	0	0	1	0	0	1	0	1	123	142
FQ312003_intergenic_2165065_2165283	FQ312003_intergenic_2165065_2165283	FQ312003_intergenic_2165065_2165283	5	0	0	0	0	1	0	0	6	195	120
FQ312003_intergenic_216900_216975	FQ312003_intergenic_216900_216975	FQ312003_intergenic_216900_216975	0	5	0	0	1	0	0	2	8	548	507
FQ312003_intergenic_2176346_2176621	FQ312003_intergenic_2176346_2176621	FQ312003_intergenic_2176346_2176621	0	0	0	0	0	3	0	1	3	321	328
FQ312003_intergenic_2183205_2183236	FQ312003_intergenic_2183205_2183236	FQ312003_intergenic_2183205_2183236	0	0	0	0	0	0	0	0	0	7	2
FQ312003_intergenic_2200333_2200990	FQ312003_intergenic_2200333_2200990	FQ312003_intergenic_2200333_2200990	5	2	0	0	2	0	0	0	0	42	16
FQ312003_intergenic_2205966_2206195	FQ312003_intergenic_2205966_2206195	FQ312003_intergenic_2205966_2206195	4	2	0	0	0	0	4	0	4	201	180
FQ312003_intergenic_220830_220869	FQ312003_intergenic_220830_220869	FQ312003_intergenic_220830_220869	0	1	0	0	0	0	0	2	1	86	79
FQ312003_intergenic_2210124_2210156	FQ312003_intergenic_2210124_2210156	FQ312003_intergenic_2210124_2210156	1	0	0	0	0	0	0	0	0	1	3
FQ312003_intergenic_2211610_2211949	FQ312003_intergenic_2211610_2211949	FQ312003_intergenic_2211610_2211949	12	5	0	0	4	0	4	6	7	107	88
FQ312003_intergenic_2223026_2223511	FQ312003_intergenic_2223026_2223511	FQ312003_intergenic_2223026_2223511	6	2	0	1	2	1	2	2	2	1521	836
FQ312003_intergenic_2227335_2227349	FQ312003_intergenic_2227335_2227349	FQ312003_intergenic_2227335_2227349	0	1	0	0	0	1	0	0	0	15	7
FQ312003_intergenic_2228812_2229161	FQ312003_intergenic_2228812_2229161	FQ312003_intergenic_2228812_2229161	4	0	0	0	1	4	0	2	5	326	213
FQ312003_intergenic_2230761_2230781	FQ312003_intergenic_2230761_2230781	FQ312003_intergenic_2230761_2230781	0	2	0	3	3	3	1	9	9	258	248
FQ312003_intergenic_2231218_2231478	FQ312003_intergenic_2231218_2231478	FQ312003_intergenic_2231218_2231478	0	2	0	2	1	0	2	3	4	243	176
FQ312003_intergenic_2233784_2233936	FQ312003_intergenic_2233784_2233936	FQ312003_intergenic_2233784_2233936	0	0	0	0	0	0	0	0	0	47	47
FQ312003_intergenic_223493_223684	FQ312003_intergenic_223493_223684	FQ312003_intergenic_223493_223684	2	1	0	1	0	1	2	2	1	13	38
FQ312003_intergenic_2239612_2239920	FQ312003_intergenic_2239612_2239920	FQ312003_intergenic_2239612_2239920	3	1	1	0	0	2	0	2	6	858	828
FQ312003_intergenic_2240336_2240497	FQ312003_intergenic_2240336_2240497	FQ312003_intergenic_2240336_2240497	2	1	0	1	2	0	0	0	2	181	184
FQ312003_intergenic_2245394_2245571	FQ312003_intergenic_2245394_2245571	FQ312003_intergenic_2245394_2245571	0	0	2	0	1	0	0	0	0	16	82
FQ312003_intergenic_2245954_2246130	FQ312003_intergenic_2245954_2246130	FQ312003_intergenic_2245954_2246130	0	0	0	0	0	1	0	0	3	324	476
FQ312003_intergenic_2247341_2247404	FQ312003_intergenic_2247341_2247404	FQ312003_intergenic_2247341_2247404	0	1	0	2	0	0	0	0	0	80	73
FQ312003_intergenic_2249539_2249678	FQ312003_intergenic_2249539_2249678	FQ312003_intergenic_2249539_2249678	3	1	0	0	0	0	2	0	0	50	45
FQ312003_intergenic_2250238_2250308	FQ312003_intergenic_2250238_2250308	FQ312003_intergenic_2250238_2250308	0	1	0	0	0	0	1	0	0	56	38
FQ312003_intergenic_2253912_2254033	FQ312003_intergenic_2253912_2254033	FQ312003_intergenic_2253912_2254033	3	0	0	0	0	0	0	0	2	70	46
FQ312003_intergenic_2258759_2258838	FQ312003_intergenic_2258759_2258838	FQ312003_intergenic_2258759_2258838	0	3	0	2	1	0	0	2	1	7	17
FQ312003_intergenic_2261237_2261402	FQ312003_intergenic_2261237_2261402	FQ312003_intergenic_2261237_2261402	1	3	0	1	0	0	0	0	0	67	42
FQ312003_intergenic_2264200_2264303	FQ312003_intergenic_2264200_2264303	FQ312003_intergenic_2264200_2264303	3	0	0	0	2	1	0	0	6	288	255
FQ312003_intergenic_2264992_2265022	FQ312003_intergenic_2264992_2265022	FQ312003_intergenic_2264992_2265022	1	0	0	0	0	0	0	0	0	3	0
FQ312003_intergenic_2268032_2268389	FQ312003_intergenic_2268032_2268389	FQ312003_intergenic_2268032_2268389	6	0	0	0	0	0	0	0	2	188	227
FQ312003_intergenic_2274523_2274547	FQ312003_intergenic_2274523_2274547	FQ312003_intergenic_2274523_2274547	5	1	0	0	0	0	0	0	0	6	5
FQ312003_intergenic_2275557_2275587	FQ312003_intergenic_2275557_2275587	FQ312003_intergenic_2275557_2275587	3	0	0	0	1	0	0	1	0	48	44
FQ312003_intergenic_2276779_2276831	FQ312003_intergenic_2276779_2276831	FQ312003_intergenic_2276779_2276831	0	0	0	0	1	0	0	1	0	48	87
FQ312003_intergenic_2277817_2277892	FQ312003_intergenic_2277817_2277892	FQ312003_intergenic_2277817_2277892	3	1	0	0	1	2	1	0	1	12	21
FQ312003_intergenic_2278955_2279058	FQ312003_intergenic_2278955_2279058	FQ312003_intergenic_2278955_2279058	0	3	0	0	2	0	0	0	0	166	104
FQ312003_intergenic_2284251_2284283	FQ312003_intergenic_2284251_2284283	FQ312003_intergenic_2284251_2284283	0	2	0	0	0	0	0	0	0	96	191
FQ312003_intergenic_2285383_2285780	FQ312003_intergenic_2285383_2285780	FQ312003_intergenic_2285383_2285780	0	2	0	0	0	0	2	4	2	322	419
FQ312003_intergenic_2286904_2286952	FQ312003_intergenic_2286904_2286952	FQ312003_intergenic_2286904_2286952	1	0	0	0	1	0	0	0	0	4	13
FQ312003_intergenic_2288879_2289107	FQ312003_intergenic_2288879_2289107	FQ312003_intergenic_2288879_2289107	2	4	0	1	0	2	1	1	2	839	706
FQ312003_intergenic_2291816_2291931	FQ312003_intergenic_2291816_2291931	FQ312003_intergenic_2291816_2291931	0	2	0	0	1	0	0	0	2	4	6
FQ312003_intergenic_2296310_2296553	FQ312003_intergenic_2296310_2296553	FQ312003_intergenic_2296310_2296553	2	0	0	0	0	0	0	4	3	10	19
FQ312003_intergenic_229765_230602	FQ312003_intergenic_229765_230602	FQ312003_intergenic_229765_230602	5	3	0	0	2	0	4	0	4	169	87
FQ312003_intergenic_2298124_2298212	FQ312003_intergenic_2298124_2298212	FQ312003_intergenic_2298124_2298212	5	0	0	2	1	2	0	0	10	265	224
FQ312003_intergenic_2299177_2299196	FQ312003_intergenic_2299177_2299196	FQ312003_intergenic_2299177_2299196	1	0	0	0	0	0	0	0	0	13	9
FQ312003_intergenic_2305121_2305388	FQ312003_intergenic_2305121_2305388	FQ312003_intergenic_2305121_2305388	3	1	0	1	0	0	0	1	0	7	10
FQ312003_intergenic_2307525_2307811	FQ312003_intergenic_2307525_2307811	FQ312003_intergenic_2307525_2307811	5	4	0	0	0	3	0	0	0	42	52
FQ312003_intergenic_2308167_2308389	FQ312003_intergenic_2308167_2308389	FQ312003_intergenic_2308167_2308389	4	0	0	2	0	0	5	0	0	367	329
FQ312003_intergenic_2309063_2309174	FQ312003_intergenic_2309063_2309174	FQ312003_intergenic_2309063_2309174	0	0	0	0	1	1	1	1	0	118	118
FQ312003_intergenic_23105_23284	FQ312003_intergenic_23105_23284	FQ312003_intergenic_23105_23284	2	0	0	0	0	0	0	2	1	95	21
FQ312003_intergenic_2311011_2311323	FQ312003_intergenic_2311011_2311323	FQ312003_intergenic_2311011_2311323	4	1	2	4	0	1	0	2	5	3102	1189
FQ312003_intergenic_2311997_2312221	FQ312003_intergenic_2311997_2312221	FQ312003_intergenic_2311997_2312221	0	0	2	0	0	0	2	0	6	139	149
FQ312003_intergenic_2319859_2320148	FQ312003_intergenic_2319859_2320148	FQ312003_intergenic_2319859_2320148	3	0	2	6	2	4	7	6	9	4454	2574
FQ312003_intergenic_2322163_2322213	FQ312003_intergenic_2322163_2322213	FQ312003_intergenic_2322163_2322213	1	0	0	0	0	0	0	0	0	75	86
FQ312003_intergenic_2324075_2324098	FQ312003_intergenic_2324075_2324098	FQ312003_intergenic_2324075_2324098	0	1	0	4	0	0	0	0	5	539	398
FQ312003_intergenic_2326248_2326326	FQ312003_intergenic_2326248_2326326	FQ312003_intergenic_2326248_2326326	0	0	0	0	0	0	0	0	2	575	407
FQ312003_intergenic_2328447_2328626	FQ312003_intergenic_2328447_2328626	FQ312003_intergenic_2328447_2328626	5	2	0	0	0	1	0	0	2	214	89
FQ312003_intergenic_2329549_2329795	FQ312003_intergenic_2329549_2329795	FQ312003_intergenic_2329549_2329795	0	0	0	0	0	0	2	2	2	43	23
FQ312003_intergenic_2332223_2332499	FQ312003_intergenic_2332223_2332499	FQ312003_intergenic_2332223_2332499	2	2	0	0	3	6	0	0	5	120	63
FQ312003_intergenic_2335294_2335489	FQ312003_intergenic_2335294_2335489	FQ312003_intergenic_2335294_2335489	2	1	0	3	0	0	0	1	2	25	20
FQ312003_intergenic_2338323_2338550	FQ312003_intergenic_2338323_2338550	FQ312003_intergenic_2338323_2338550	0	0	6	3	3	5	2	8	15	17	25
FQ312003_intergenic_2341018_2341085	FQ312003_intergenic_2341018_2341085	FQ312003_intergenic_2341018_2341085	1	2	0	0	0	0	0	1	1	53	31
FQ312003_intergenic_2341390_2341585	FQ312003_intergenic_2341390_2341585	FQ312003_intergenic_2341390_2341585	1	4	0	0	0	4	2	3	1	58	29
FQ312003_intergenic_2342514_2342679	FQ312003_intergenic_2342514_2342679	FQ312003_intergenic_2342514_2342679	9	1	0	0	2	2	0	0	2	41	42
FQ312003_intergenic_2342984_2343074	FQ312003_intergenic_2342984_2343074	FQ312003_intergenic_2342984_2343074	1	0	0	4	0	2	0	4	3	80	22
FQ312003_intergenic_2343739_2344367	FQ312003_intergenic_2343739_2344367	FQ312003_intergenic_2343739_2344367	0	4	0	3	2	1	3	9	14	346	254
FQ312003_intergenic_2352511_2352525	FQ312003_intergenic_2352511_2352525	FQ312003_intergenic_2352511_2352525	0	0	0	0	0	0	0	1	3	8	12
FQ312003_intergenic_2357412_2357724	FQ312003_intergenic_2357412_2357724	FQ312003_intergenic_2357412_2357724	7	0	0	0	1	0	0	0	0	365	123
FQ312003_intergenic_2358320_2358427	FQ312003_intergenic_2358320_2358427	FQ312003_intergenic_2358320_2358427	4	0	0	0	0	0	2	0	1	377	364
FQ312003_intergenic_2363095_2363108	FQ312003_intergenic_2363095_2363108	FQ312003_intergenic_2363095_2363108	0	0	0	0	0	0	0	0	0	2	2
FQ312003_intergenic_2364178_2364973	FQ312003_intergenic_2364178_2364973	FQ312003_intergenic_2364178_2364973	14	19	37	83	44	97	11	87	239	9668	9608
FQ312003_intergenic_2371360_2371376	FQ312003_intergenic_2371360_2371376	FQ312003_intergenic_2371360_2371376	3	0	0	0	0	0	0	0	0	0	7
FQ312003_intergenic_2374114_2374422	FQ312003_intergenic_2374114_2374422	FQ312003_intergenic_2374114_2374422	7	1	0	2	4	1	2	0	3	122	168
FQ312003_intergenic_2377066_2377203	FQ312003_intergenic_2377066_2377203	FQ312003_intergenic_2377066_2377203	0	0	0	0	0	0	0	0	0	18	16
FQ312003_intergenic_2378811_2379065	FQ312003_intergenic_2378811_2379065	FQ312003_intergenic_2378811_2379065	2	1	0	0	0	0	0	2	5	548	443
FQ312003_intergenic_2381452_2381463	FQ312003_intergenic_2381452_2381463	FQ312003_intergenic_2381452_2381463	0	0	0	0	0	0	0	0	0	20	29
FQ312003_intergenic_2384141_2384201	FQ312003_intergenic_2384141_2384201	FQ312003_intergenic_2384141_2384201	0	0	0	0	0	0	0	0	0	41	26
FQ312003_intergenic_2385181_2385195	FQ312003_intergenic_2385181_2385195	FQ312003_intergenic_2385181_2385195	0	0	0	0	0	0	1	0	0	185	133
FQ312003_intergenic_238538_238606	FQ312003_intergenic_238538_238606	FQ312003_intergenic_238538_238606	3	0	0	0	0	0	0	0	0	55	46
FQ312003_intergenic_2387730_2387901	FQ312003_intergenic_2387730_2387901	FQ312003_intergenic_2387730_2387901	2	0	0	0	1	1	0	0	0	1044	726
FQ312003_intergenic_2392067_2392460	FQ312003_intergenic_2392067_2392460	FQ312003_intergenic_2392067_2392460	3	0	0	7	0	2	3	4	9	1091	642
FQ312003_intergenic_2397982_2398130	FQ312003_intergenic_2397982_2398130	FQ312003_intergenic_2397982_2398130	0	0	0	0	0	0	0	0	0	26	20
FQ312003_intergenic_2399428_2399441	FQ312003_intergenic_2399428_2399441	FQ312003_intergenic_2399428_2399441	1	0	0	0	1	0	0	0	0	10	20
FQ312003_intergenic_2400190_2400262	FQ312003_intergenic_2400190_2400262	FQ312003_intergenic_2400190_2400262	1	0	0	0	0	2	0	0	1	10	1
FQ312003_intergenic_2401439_2401618	FQ312003_intergenic_2401439_2401618	FQ312003_intergenic_2401439_2401618	2	0	0	1	1	1	0	1	0	96	64
FQ312003_intergenic_24090_24418	FQ312003_intergenic_24090_24418	FQ312003_intergenic_24090_24418	4	0	0	0	0	1	2	0	0	176	67
FQ312003_intergenic_2421233_2422019	FQ312003_intergenic_2421233_2422019	FQ312003_intergenic_2421233_2422019	4	5	0	1	1	0	4	2	9	109	44
FQ312003_intergenic_2425114_2425326	FQ312003_intergenic_2425114_2425326	FQ312003_intergenic_2425114_2425326	0	2	0	4	4	4	2	4	13	72	79
FQ312003_intergenic_2437265_2437558	FQ312003_intergenic_2437265_2437558	FQ312003_intergenic_2437265_2437558	4	1	0	2	0	0	1	0	8	2119	2175
FQ312003_intergenic_2438830_2439660	FQ312003_intergenic_2438830_2439660	FQ312003_intergenic_2438830_2439660	4	2	8	8	7	7	2	4	11	5536	3470
FQ312003_intergenic_244409_244437	FQ312003_intergenic_244409_244437	FQ312003_intergenic_244409_244437	0	0	0	0	0	2	0	0	1	75	62
FQ312003_intergenic_2445366_2445604	FQ312003_intergenic_2445366_2445604	FQ312003_intergenic_2445366_2445604	0	0	0	0	1	0	0	0	2	1635	911
FQ312003_intergenic_2449129_2449245	FQ312003_intergenic_2449129_2449245	FQ312003_intergenic_2449129_2449245	2	3	2	2	0	0	0	0	1	29	27
FQ312003_intergenic_2454897_2455048	FQ312003_intergenic_2454897_2455048	FQ312003_intergenic_2454897_2455048	0	0	0	0	0	0	0	2	1	37	39
FQ312003_intergenic_2458037_2458078	FQ312003_intergenic_2458037_2458078	FQ312003_intergenic_2458037_2458078	0	0	1	2	0	0	0	1	7	156	81
FQ312003_intergenic_2458827_2458851	FQ312003_intergenic_2458827_2458851	FQ312003_intergenic_2458827_2458851	1	1	1	1	0	0	0	0	0	139	66
FQ312003_intergenic_245966_246017	FQ312003_intergenic_245966_246017	FQ312003_intergenic_245966_246017	2	0	0	0	0	0	0	0	0	1	12
FQ312003_intergenic_2462075_2462156	FQ312003_intergenic_2462075_2462156	FQ312003_intergenic_2462075_2462156	4	0	0	0	0	0	0	2	7	84	84
FQ312003_intergenic_2463040_2463176	FQ312003_intergenic_2463040_2463176	FQ312003_intergenic_2463040_2463176	1	0	0	0	0	0	0	0	3	42	41
FQ312003_intergenic_2464060_2464247	FQ312003_intergenic_2464060_2464247	FQ312003_intergenic_2464060_2464247	1	4	0	0	0	0	0	0	1	186	181
FQ312003_intergenic_2470429_2470538	FQ312003_intergenic_2470429_2470538	FQ312003_intergenic_2470429_2470538	4	0	0	0	0	0	0	2	0	18	9
FQ312003_intergenic_2474146_2474355	FQ312003_intergenic_2474146_2474355	FQ312003_intergenic_2474146_2474355	5	2	0	0	0	1	0	0	6	68	129
FQ312003_intergenic_2477371_2477419	FQ312003_intergenic_2477371_2477419	FQ312003_intergenic_2477371_2477419	1	0	0	1	1	2	1	0	1	271	118
FQ312003_intergenic_247751_247896	FQ312003_intergenic_247751_247896	FQ312003_intergenic_247751_247896	2	2	0	0	0	0	0	0	1	299	189
FQ312003_intergenic_2483538_2483616	FQ312003_intergenic_2483538_2483616	FQ312003_intergenic_2483538_2483616	0	0	0	0	0	0	0	0	2	49	42
FQ312003_intergenic_2484092_2484163	FQ312003_intergenic_2484092_2484163	FQ312003_intergenic_2484092_2484163	0	1	0	0	0	0	2	0	2	36	21
FQ312003_intergenic_2484513_2484580	FQ312003_intergenic_2484513_2484580	FQ312003_intergenic_2484513_2484580	2	1	0	0	0	0	0	0	2	27	15
FQ312003_intergenic_2494361_2494425	FQ312003_intergenic_2494361_2494425	FQ312003_intergenic_2494361_2494425	1	1	0	0	1	0	2	0	0	28	25
FQ312003_intergenic_2495663_2495770	FQ312003_intergenic_2495663_2495770	FQ312003_intergenic_2495663_2495770	1	2	2	17	2	3	0	9	9	1019	996
FQ312003_intergenic_2499329_2499405	FQ312003_intergenic_2499329_2499405	FQ312003_intergenic_2499329_2499405	2	0	2	1	0	1	1	0	0	29	6
FQ312003_intergenic_2499791_2500054	FQ312003_intergenic_2499791_2500054	FQ312003_intergenic_2499791_2500054	0	2	2	1	0	2	2	0	0	264	186
FQ312003_intergenic_2502285_2502472	FQ312003_intergenic_2502285_2502472	FQ312003_intergenic_2502285_2502472	1	0	0	1	0	0	2	2	0	199	224
FQ312003_intergenic_2503515_2503720	FQ312003_intergenic_2503515_2503720	FQ312003_intergenic_2503515_2503720	2	0	2	1	2	5	0	4	5	755	557
FQ312003_intergenic_2504760_2504926	FQ312003_intergenic_2504760_2504926	FQ312003_intergenic_2504760_2504926	2	0	1	0	0	0	0	0	1	1066	413
FQ312003_intergenic_2509461_2509795	FQ312003_intergenic_2509461_2509795	FQ312003_intergenic_2509461_2509795	2	3	0	0	1	2	2	0	0	376	163
FQ312003_intergenic_2511288_2511462	FQ312003_intergenic_2511288_2511462	FQ312003_intergenic_2511288_2511462	6	0	0	0	0	0	0	2	0	692	475
FQ312003_intergenic_2511806_2512226	FQ312003_intergenic_2511806_2512226	FQ312003_intergenic_2511806_2512226	2	0	0	0	4	0	2	4	10	723	310
FQ312003_intergenic_2513248_2513670	FQ312003_intergenic_2513248_2513670	FQ312003_intergenic_2513248_2513670	1	0	0	0	0	0	6	4	2	182	256
FQ312003_intergenic_2515010_2515629	FQ312003_intergenic_2515010_2515629	FQ312003_intergenic_2515010_2515629	4	2	0	1	2	1	0	1	12	272	260
FQ312003_intergenic_2516696_2516798	FQ312003_intergenic_2516696_2516798	FQ312003_intergenic_2516696_2516798	2	2	0	0	1	0	0	1	4	506	336
FQ312003_intergenic_2519807_2519885	FQ312003_intergenic_2519807_2519885	FQ312003_intergenic_2519807_2519885	0	0	0	0	0	0	0	0	0	65	79
FQ312003_intergenic_2520985_2520997	FQ312003_intergenic_2520985_2520997	FQ312003_intergenic_2520985_2520997	0	0	0	0	0	0	0	2	1	1	13
FQ312003_intergenic_2522727_2522968	FQ312003_intergenic_2522727_2522968	FQ312003_intergenic_2522727_2522968	0	0	0	0	0	0	0	4	1	1622	1059
FQ312003_intergenic_2526514_2527018	FQ312003_intergenic_2526514_2527018	FQ312003_intergenic_2526514_2527018	1	4	0	2	2	4	122	6	10	575	286
FQ312003_intergenic_252862_252997	FQ312003_intergenic_252862_252997	FQ312003_intergenic_252862_252997	4	1	0	1	0	1	0	0	0	72	121
FQ312003_intergenic_2529345_2530059	FQ312003_intergenic_2529345_2530059	FQ312003_intergenic_2529345_2530059	7	3	0	2	2	2	243	8	55	1217	616
FQ312003_intergenic_2533458_2533612	FQ312003_intergenic_2533458_2533612	FQ312003_intergenic_2533458_2533612	1	1	0	0	3	0	0	0	1	16	4
FQ312003_intergenic_253893_254242	FQ312003_intergenic_253893_254242	FQ312003_intergenic_253893_254242	6	9	4	16	0	34	4	14	31	9910	9765
FQ312003_intergenic_2539841_2539971	FQ312003_intergenic_2539841_2539971	FQ312003_intergenic_2539841_2539971	0	0	2	0	0	0	0	0	0	131	119
FQ312003_intergenic_2540834_2540896	FQ312003_intergenic_2540834_2540896	FQ312003_intergenic_2540834_2540896	0	0	0	0	0	0	0	1	1	127	157
FQ312003_intergenic_2541969_2542251	FQ312003_intergenic_2541969_2542251	FQ312003_intergenic_2541969_2542251	1	0	0	1	1	2	2	5	14	2802	4060
FQ312003_intergenic_2544936_2544983	FQ312003_intergenic_2544936_2544983	FQ312003_intergenic_2544936_2544983	1	1	0	0	0	0	0	0	1	8	3
FQ312003_intergenic_2549287_2549316	FQ312003_intergenic_2549287_2549316	FQ312003_intergenic_2549287_2549316	0	1	0	0	2	0	0	0	0	74	141
FQ312003_intergenic_255069_255225	FQ312003_intergenic_255069_255225	FQ312003_intergenic_255069_255225	3	0	3	5	8	4	2	25	38	368	818
FQ312003_intergenic_2554208_2554264	FQ312003_intergenic_2554208_2554264	FQ312003_intergenic_2554208_2554264	1	0	0	0	0	0	0	0	0	131	54
FQ312003_intergenic_2555157_2555293	FQ312003_intergenic_2555157_2555293	FQ312003_intergenic_2555157_2555293	2	0	0	0	0	0	3	0	1	52	65
FQ312003_intergenic_2557887_2557998	FQ312003_intergenic_2557887_2557998	FQ312003_intergenic_2557887_2557998	0	0	0	0	0	0	0	0	0	269	192
FQ312003_intergenic_2560221_2560248	FQ312003_intergenic_2560221_2560248	FQ312003_intergenic_2560221_2560248	1	0	0	0	0	2	0	0	0	77	40
FQ312003_intergenic_2561627_2561725	FQ312003_intergenic_2561627_2561725	FQ312003_intergenic_2561627_2561725	8	0	0	0	1	0	0	0	0	5	22
FQ312003_intergenic_256178_256221	FQ312003_intergenic_256178_256221	FQ312003_intergenic_256178_256221	2	2	0	2	0	2	3	0	0	102	264
FQ312003_intergenic_2569017_2569035	FQ312003_intergenic_2569017_2569035	FQ312003_intergenic_2569017_2569035	1	0	1	0	0	0	0	1	0	3	1
FQ312003_intergenic_257048_257093	FQ312003_intergenic_257048_257093	FQ312003_intergenic_257048_257093	0	0	0	4	0	1	0	5	4	687	423
FQ312003_intergenic_2576617_2576996	FQ312003_intergenic_2576617_2576996	FQ312003_intergenic_2576617_2576996	0	0	0	0	0	0	0	0	1	64	29
FQ312003_intergenic_257752_257791	FQ312003_intergenic_257752_257791	FQ312003_intergenic_257752_257791	3	1	1	0	0	0	0	1	5	53	40
FQ312003_intergenic_2577556_2577644	FQ312003_intergenic_2577556_2577644	FQ312003_intergenic_2577556_2577644	1	0	0	0	0	0	2	0	0	5	12
FQ312003_intergenic_2580025_2580195	FQ312003_intergenic_2580025_2580195	FQ312003_intergenic_2580025_2580195	2	2	0	0	0	0	0	0	2	271	155
FQ312003_intergenic_2583560_2583586	FQ312003_intergenic_2583560_2583586	FQ312003_intergenic_2583560_2583586	0	1	0	0	0	0	0	0	0	315	274
FQ312003_intergenic_2584731_2584754	FQ312003_intergenic_2584731_2584754	FQ312003_intergenic_2584731_2584754	0	0	0	0	0	0	0	0	0	24	22
FQ312003_intergenic_2585431_2585533	FQ312003_intergenic_2585431_2585533	FQ312003_intergenic_2585431_2585533	1	0	0	0	2	0	0	0	0	242	125
FQ312003_intergenic_2586933_2587280	FQ312003_intergenic_2586933_2587280	FQ312003_intergenic_2586933_2587280	5	2	0	0	0	2	0	2	1	85	88
FQ312003_intergenic_2589343_2589427	FQ312003_intergenic_2589343_2589427	FQ312003_intergenic_2589343_2589427	0	0	0	0	0	0	0	0	0	309	216
FQ312003_intergenic_259089_259300	FQ312003_intergenic_259089_259300	FQ312003_intergenic_259089_259300	15	3	4	3	0	1	2	2	4	305	224
FQ312003_intergenic_2591229_2591312	FQ312003_intergenic_2591229_2591312	FQ312003_intergenic_2591229_2591312	0	0	0	0	1	0	0	0	0	22	33
FQ312003_intergenic_2594527_2594999	FQ312003_intergenic_2594527_2594999	FQ312003_intergenic_2594527_2594999	2	0	2	14	6	7	0	10	45	5830	3659
FQ312003_intergenic_2599740_2599769	FQ312003_intergenic_2599740_2599769	FQ312003_intergenic_2599740_2599769	0	0	0	0	0	0	0	0	1	8	13
FQ312003_intergenic_2600584_2600657	FQ312003_intergenic_2600584_2600657	FQ312003_intergenic_2600584_2600657	1	1	0	1	0	2	0	0	3	63	98
FQ312003_intergenic_2602688_2602732	FQ312003_intergenic_2602688_2602732	FQ312003_intergenic_2602688_2602732	0	0	1	0	0	0	0	0	0	91	60
FQ312003_intergenic_2604165_2604361	FQ312003_intergenic_2604165_2604361	FQ312003_intergenic_2604165_2604361	5	0	0	0	0	0	0	0	2	33	73
FQ312003_intergenic_2605530_2605636	FQ312003_intergenic_2605530_2605636	FQ312003_intergenic_2605530_2605636	0	2	0	0	0	0	0	0	3	92	59
FQ312003_intergenic_2610426_2610723	FQ312003_intergenic_2610426_2610723	FQ312003_intergenic_2610426_2610723	7	2	0	2	0	1	1	2	0	168	156
FQ312003_intergenic_2612515_2612602	FQ312003_intergenic_2612515_2612602	FQ312003_intergenic_2612515_2612602	1	2	0	0	0	0	2	1	0	299	206
FQ312003_intergenic_2618565_2618768	FQ312003_intergenic_2618565_2618768	FQ312003_intergenic_2618565_2618768	1	0	0	0	0	1	1	0	3	532	196
FQ312003_intergenic_2619169_2619608	FQ312003_intergenic_2619169_2619608	FQ312003_intergenic_2619169_2619608	4	0	0	9	4	6	0	3	5	3816	2186
FQ312003_intergenic_2620415_2620470	FQ312003_intergenic_2620415_2620470	FQ312003_intergenic_2620415_2620470	0	1	0	0	0	0	0	0	0	17	14
FQ312003_intergenic_2623685_2623744	FQ312003_intergenic_2623685_2623744	FQ312003_intergenic_2623685_2623744	0	2	0	0	0	0	0	0	3	8	6
FQ312003_intergenic_2625195_2625255	FQ312003_intergenic_2625195_2625255	FQ312003_intergenic_2625195_2625255	2	2	0	0	0	0	0	0	7	26	70
FQ312003_intergenic_2631476_2632068	FQ312003_intergenic_2631476_2632068	FQ312003_intergenic_2631476_2632068	3	2	0	2	3	0	0	2	2	276	164
FQ312003_intergenic_2639476_2639540	FQ312003_intergenic_2639476_2639540	FQ312003_intergenic_2639476_2639540	1	0	0	1	0	1	0	1	3	69	84
FQ312003_intergenic_2645239_2645257	FQ312003_intergenic_2645239_2645257	FQ312003_intergenic_2645239_2645257	1	0	0	0	0	0	1	0	0	3	3
FQ312003_intergenic_264840_264861	FQ312003_intergenic_264840_264861	FQ312003_intergenic_264840_264861	3	0	2	1	3	5	0	1	13	79	61
FQ312003_intergenic_2648568_2648812	FQ312003_intergenic_2648568_2648812	FQ312003_intergenic_2648568_2648812	3	2	0	0	0	0	0	0	0	493	134
FQ312003_intergenic_2650696_2650713	FQ312003_intergenic_2650696_2650713	FQ312003_intergenic_2650696_2650713	1	0	0	0	0	0	0	0	2	14	13
FQ312003_intergenic_2656172_2656362	FQ312003_intergenic_2656172_2656362	FQ312003_intergenic_2656172_2656362	4	2	0	5	1	1	1	0	5	1250	1192
FQ312003_intergenic_2657630_2657735	FQ312003_intergenic_2657630_2657735	FQ312003_intergenic_2657630_2657735	3	0	0	2	0	0	1	1	2	305	418
FQ312003_intergenic_2658268_2658287	FQ312003_intergenic_2658268_2658287	FQ312003_intergenic_2658268_2658287	0	0	0	0	1	0	1	0	0	59	45
FQ312003_intergenic_2663085_2663112	FQ312003_intergenic_2663085_2663112	FQ312003_intergenic_2663085_2663112	2	0	0	0	0	0	0	1	0	9	7
FQ312003_intergenic_2670464_2670571	FQ312003_intergenic_2670464_2670571	FQ312003_intergenic_2670464_2670571	2	0	0	0	1	0	2	0	0	32	23
FQ312003_intergenic_2671515_2671660	FQ312003_intergenic_2671515_2671660	FQ312003_intergenic_2671515_2671660	0	0	0	2	0	2	0	0	3	194	200
FQ312003_intergenic_2672430_2672897	FQ312003_intergenic_2672430_2672897	FQ312003_intergenic_2672430_2672897	6	2	2	0	2	4	0	4	6	292	541
FQ312003_intergenic_2675168_2675313	FQ312003_intergenic_2675168_2675313	FQ312003_intergenic_2675168_2675313	2	0	0	1	3	0	1	3	0	54	56
FQ312003_intergenic_2678342_2678436	FQ312003_intergenic_2678342_2678436	FQ312003_intergenic_2678342_2678436	0	2	3	1	1	2	0	3	3	50	107
FQ312003_intergenic_2680518_2680597	FQ312003_intergenic_2680518_2680597	FQ312003_intergenic_2680518_2680597	2	0	2	2	3	0	0	0	1	149	259
FQ312003_intergenic_2681193_2681251	FQ312003_intergenic_2681193_2681251	FQ312003_intergenic_2681193_2681251	1	1	0	0	0	2	0	1	4	3729	3855
FQ312003_intergenic_2682084_2682101	FQ312003_intergenic_2682084_2682101	FQ312003_intergenic_2682084_2682101	1	0	0	0	1	0	1	0	0	249	159
FQ312003_intergenic_2683006_2683049	FQ312003_intergenic_2683006_2683049	FQ312003_intergenic_2683006_2683049	4	2	0	2	0	0	0	0	2	24	48
FQ312003_intergenic_2684029_2684109	FQ312003_intergenic_2684029_2684109	FQ312003_intergenic_2684029_2684109	0	0	0	0	0	0	0	2	0	48	25
FQ312003_intergenic_2688716_2688740	FQ312003_intergenic_2688716_2688740	FQ312003_intergenic_2688716_2688740	2	1	0	0	0	0	1	1	2	96	79
FQ312003_intergenic_2691253_2691347	FQ312003_intergenic_2691253_2691347	FQ312003_intergenic_2691253_2691347	1	0	0	0	0	0	1	0	2	15	13
FQ312003_intergenic_2692702_2692925	FQ312003_intergenic_2692702_2692925	FQ312003_intergenic_2692702_2692925	5	0	0	0	0	0	0	2	1	338	397
FQ312003_intergenic_2694217_2694297	FQ312003_intergenic_2694217_2694297	FQ312003_intergenic_2694217_2694297	1	0	0	0	0	0	2	0	0	23	35
FQ312003_intergenic_2695943_2696202	FQ312003_intergenic_2695943_2696202	FQ312003_intergenic_2695943_2696202	3	1	0	0	0	0	6	0	2	12	3
FQ312003_intergenic_2705384_2705920	FQ312003_intergenic_2705384_2705920	FQ312003_intergenic_2705384_2705920	12	2	6	57	8	52	4	30	89	1625	1209
FQ312003_intergenic_2709909_2710063	FQ312003_intergenic_2709909_2710063	FQ312003_intergenic_2709909_2710063	4	2	0	1	0	0	0	0	2	239	68
FQ312003_intergenic_2715240_2715254	FQ312003_intergenic_2715240_2715254	FQ312003_intergenic_2715240_2715254	0	0	0	0	0	0	0	0	0	21	23
FQ312003_intergenic_2718378_2718392	FQ312003_intergenic_2718378_2718392	FQ312003_intergenic_2718378_2718392	1	0	0	0	0	0	0	0	0	13	2
FQ312003_intergenic_2723275_2723447	FQ312003_intergenic_2723275_2723447	FQ312003_intergenic_2723275_2723447	2	2	0	0	1	0	0	0	1	184	91
FQ312003_intergenic_2726339_2726666	FQ312003_intergenic_2726339_2726666	FQ312003_intergenic_2726339_2726666	4	4	0	0	0	1	0	0	1	451	258
FQ312003_intergenic_2728237_2728992	FQ312003_intergenic_2728237_2728992	FQ312003_intergenic_2728237_2728992	12	7	26	57	17	79	3	37	91	1484	825
FQ312003_intergenic_2729639_2730202	FQ312003_intergenic_2729639_2730202	FQ312003_intergenic_2729639_2730202	5	4	4	7	3	2	0	9	22	751	553
FQ312003_intergenic_2730369_2730649	FQ312003_intergenic_2730369_2730649	FQ312003_intergenic_2730369_2730649	0	1	0	0	1	0	0	0	1	69	48
FQ312003_intergenic_274049_274127	FQ312003_intergenic_274049_274127	FQ312003_intergenic_274049_274127	3	1	0	0	0	0	0	0	3	2	1
FQ312003_intergenic_2755773_2755958	FQ312003_intergenic_2755773_2755958	FQ312003_intergenic_2755773_2755958	2	3	0	2	0	0	0	0	1	20	19
FQ312003_intergenic_2756461_2756595	FQ312003_intergenic_2756461_2756595	FQ312003_intergenic_2756461_2756595	1	0	0	2	0	0	0	1	5	148	163
FQ312003_intergenic_2757619_2758106	FQ312003_intergenic_2757619_2758106	FQ312003_intergenic_2757619_2758106	1	2	0	0	0	0	2	2	2	459	210
FQ312003_intergenic_2758894_2759702	FQ312003_intergenic_2758894_2759702	FQ312003_intergenic_2758894_2759702	10	2	0	0	2	8	8	6	10	2223	1756
FQ312003_intergenic_2760367_2760538	FQ312003_intergenic_2760367_2760538	FQ312003_intergenic_2760367_2760538	3	0	2	0	0	0	3	0	1	169	104
FQ312003_intergenic_2762062_2762169	FQ312003_intergenic_2762062_2762169	FQ312003_intergenic_2762062_2762169	0	0	0	0	0	0	0	3	0	42	60
FQ312003_intergenic_2763156_2763171	FQ312003_intergenic_2763156_2763171	FQ312003_intergenic_2763156_2763171	0	0	0	1	0	1	0	0	0	274	177
FQ312003_intergenic_2763506_2763663	FQ312003_intergenic_2763506_2763663	FQ312003_intergenic_2763506_2763663	4	0	0	0	0	1	2	0	4	213	146
FQ312003_intergenic_2768258_2768315	FQ312003_intergenic_2768258_2768315	FQ312003_intergenic_2768258_2768315	1	0	0	0	2	0	0	0	0	79	136
FQ312003_intergenic_2768884_2768934	FQ312003_intergenic_2768884_2768934	FQ312003_intergenic_2768884_2768934	0	1	0	1	0	4	0	0	6	4291	2949
FQ312003_intergenic_2770435_2770585	FQ312003_intergenic_2770435_2770585	FQ312003_intergenic_2770435_2770585	5	0	0	0	0	0	2	0	0	32	37
FQ312003_intergenic_2770842_2771044	FQ312003_intergenic_2770842_2771044	FQ312003_intergenic_2770842_2771044	3	0	0	1	0	0	1	0	0	96	166
FQ312003_intergenic_2777280_2777676	FQ312003_intergenic_2777280_2777676	FQ312003_intergenic_2777280_2777676	0	2	0	4	2	0	6	0	3	221	132
FQ312003_intergenic_2780467_2780790	FQ312003_intergenic_2780467_2780790	FQ312003_intergenic_2780467_2780790	3	2	3	4	0	3	0	0	20	1491	1052
FQ312003_intergenic_2783236_2783265	FQ312003_intergenic_2783236_2783265	FQ312003_intergenic_2783236_2783265	1	0	0	0	0	0	0	0	0	174	206
FQ312003_intergenic_278654_278696	FQ312003_intergenic_278654_278696	FQ312003_intergenic_278654_278696	0	0	0	0	0	0	0	0	2	49	53
FQ312003_intergenic_2786753_2786970	FQ312003_intergenic_2786753_2786970	FQ312003_intergenic_2786753_2786970	0	0	0	6	0	2	0	1	3	5897	4516
FQ312003_intergenic_2787761_2787775	FQ312003_intergenic_2787761_2787775	FQ312003_intergenic_2787761_2787775	0	0	0	0	0	0	0	0	0	5	29
FQ312003_intergenic_2788914_2789016	FQ312003_intergenic_2788914_2789016	FQ312003_intergenic_2788914_2789016	2	0	0	0	0	0	0	0	1	190	175
FQ312003_intergenic_2793004_2793017	FQ312003_intergenic_2793004_2793017	FQ312003_intergenic_2793004_2793017	1	0	0	0	0	0	0	4	2	152	147
FQ312003_intergenic_2796699_2802478	FQ312003_intergenic_2796699_2802478	FQ312003_intergenic_2796699_2802478	15640	15057	86469	255893	98586	192710	2658	218433	551513	2120673	1907975
FQ312003_intergenic_2805153_2805181	FQ312003_intergenic_2805153_2805181	FQ312003_intergenic_2805153_2805181	0	1	1	2	1	2	0	1	3	103	81
FQ312003_intergenic_280558_280636	FQ312003_intergenic_280558_280636	FQ312003_intergenic_280558_280636	2	2	0	0	0	1	0	0	2	12	4
FQ312003_intergenic_2806991_2807021	FQ312003_intergenic_2806991_2807021	FQ312003_intergenic_2806991_2807021	1	4	0	0	0	0	0	0	2	699	707
FQ312003_intergenic_2807860_2808030	FQ312003_intergenic_2807860_2808030	FQ312003_intergenic_2807860_2808030	2	0	0	2	0	0	0	1	5	513	254
FQ312003_intergenic_2808470_2808619	FQ312003_intergenic_2808470_2808619	FQ312003_intergenic_2808470_2808619	0	0	0	0	0	0	0	2	0	29	25
FQ312003_intergenic_2813009_2813347	FQ312003_intergenic_2813009_2813347	FQ312003_intergenic_2813009_2813347	2	1	0	2	10	6	0	4	19	1425	538
FQ312003_intergenic_2815180_2815331	FQ312003_intergenic_2815180_2815331	FQ312003_intergenic_2815180_2815331	2	0	0	0	0	0	2	0	2	25	33
FQ312003_intergenic_2824787_2824880	FQ312003_intergenic_2824787_2824880	FQ312003_intergenic_2824787_2824880	4	0	0	0	0	0	0	0	1	289	192
FQ312003_intergenic_2825966_2826010	FQ312003_intergenic_2825966_2826010	FQ312003_intergenic_2825966_2826010	2	0	0	0	0	0	0	0	0	5	11
FQ312003_intergenic_2828127_2828339	FQ312003_intergenic_2828127_2828339	FQ312003_intergenic_2828127_2828339	6	0	0	1	2	0	1	2	3	32	96
FQ312003_intergenic_2829802_2829866	FQ312003_intergenic_2829802_2829866	FQ312003_intergenic_2829802_2829866	2	0	0	0	0	2	0	0	1	215	164
FQ312003_intergenic_2832065_2832084	FQ312003_intergenic_2832065_2832084	FQ312003_intergenic_2832065_2832084	0	0	0	0	0	0	2	0	0	132	91
FQ312003_intergenic_2833416_2833437	FQ312003_intergenic_2833416_2833437	FQ312003_intergenic_2833416_2833437	1	0	0	0	1	0	0	0	0	350	438
FQ312003_intergenic_2836164_2836211	FQ312003_intergenic_2836164_2836211	FQ312003_intergenic_2836164_2836211	0	1	0	0	0	0	0	1	1	749	373
FQ312003_intergenic_2836651_2836715	FQ312003_intergenic_2836651_2836715	FQ312003_intergenic_2836651_2836715	0	0	0	1	0	0	1	0	11	183	455
FQ312003_intergenic_2837573_2837621	FQ312003_intergenic_2837573_2837621	FQ312003_intergenic_2837573_2837621	0	0	0	0	1	0	0	0	3	85	101
FQ312003_intergenic_2838205_2838717	FQ312003_intergenic_2838205_2838717	FQ312003_intergenic_2838205_2838717	7	2	0	0	0	4	2	2	6	1115	343
FQ312003_intergenic_285446_285463	FQ312003_intergenic_285446_285463	FQ312003_intergenic_285446_285463	3	0	0	0	0	0	0	0	0	62	60
FQ312003_intergenic_2855115_2855565	FQ312003_intergenic_2855115_2855565	FQ312003_intergenic_2855115_2855565	242	145	789	2631	1826	2045	13	4052	10001	69744	49782
FQ312003_intergenic_2862521_2862536	FQ312003_intergenic_2862521_2862536	FQ312003_intergenic_2862521_2862536	1	1	0	0	0	0	0	0	0	4	2
FQ312003_intergenic_2862841_2862953	FQ312003_intergenic_2862841_2862953	FQ312003_intergenic_2862841_2862953	2	0	0	0	0	0	0	0	0	7398	2660
FQ312003_intergenic_2863777_2863872	FQ312003_intergenic_2863777_2863872	FQ312003_intergenic_2863777_2863872	4	1	0	0	0	1	0	0	7	3213	2165
FQ312003_intergenic_2874329_2874370	FQ312003_intergenic_2874329_2874370	FQ312003_intergenic_2874329_2874370	1	0	0	0	0	0	0	0	0	1	2
FQ312003_intergenic_2878844_2879019	FQ312003_intergenic_2878844_2879019	FQ312003_intergenic_2878844_2879019	1	0	0	0	0	0	0	0	1	51	59
FQ312003_intergenic_2880531_2880589	FQ312003_intergenic_2880531_2880589	FQ312003_intergenic_2880531_2880589	0	0	0	0	0	1	0	0	0	62	52
FQ312003_intergenic_288096_288184	FQ312003_intergenic_288096_288184	FQ312003_intergenic_288096_288184	0	0	0	0	0	0	0	0	0	183	105
FQ312003_intergenic_2881124_2881346	FQ312003_intergenic_2881124_2881346	FQ312003_intergenic_2881124_2881346	0	2	0	0	0	0	2	0	0	59	36
FQ312003_intergenic_2884763_2884956	FQ312003_intergenic_2884763_2884956	FQ312003_intergenic_2884763_2884956	0	0	0	0	0	0	2	0	0	0	1
FQ312003_intergenic_2885659_2885902	FQ312003_intergenic_2885659_2885902	FQ312003_intergenic_2885659_2885902	0	0	4	10	2	5	0	6	21	2273	1653
FQ312003_intergenic_2886794_2886869	FQ312003_intergenic_2886794_2886869	FQ312003_intergenic_2886794_2886869	2	0	0	0	2	0	1	0	0	101	82
FQ312003_intergenic_288852_295009	FQ312003_intergenic_288852_295009	FQ312003_intergenic_288852_295009	17065	15931	93057	272175	109618	206585	2829	228650	592997	1948088	1885473
FQ312003_intergenic_2889781_2890022	FQ312003_intergenic_2889781_2890022	FQ312003_intergenic_2889781_2890022	2	0	0	0	0	0	0	0	0	54	56
FQ312003_intergenic_2893776_2894391	FQ312003_intergenic_2893776_2894391	FQ312003_intergenic_2893776_2894391	12	0	0	2	1	0	0	0	5	19571	6471
FQ312003_intergenic_2896118_2896751	FQ312003_intergenic_2896118_2896751	FQ312003_intergenic_2896118_2896751	4	0	0	0	0	0	2	0	0	108	147
FQ312003_intergenic_2900293_2900683	FQ312003_intergenic_2900293_2900683	FQ312003_intergenic_2900293_2900683	6	0	0	0	0	0	0	0	0	17	8
FQ312003_intergenic_2902670_2902958	FQ312003_intergenic_2902670_2902958	FQ312003_intergenic_2902670_2902958	2	4	0	2	2	0	0	1	1	119	59
FQ312003_intergenic_2904253_2904486	FQ312003_intergenic_2904253_2904486	FQ312003_intergenic_2904253_2904486	0	2	0	0	0	0	0	1	4	115	184
FQ312003_intergenic_2905415_2905764	FQ312003_intergenic_2905415_2905764	FQ312003_intergenic_2905415_2905764	2	0	0	0	2	0	0	0	1	148	97
FQ312003_intergenic_2908186_2908587	FQ312003_intergenic_2908186_2908587	FQ312003_intergenic_2908186_2908587	2	13	0	2	0	0	0	0	0	8	8
FQ312003_intergenic_2910835_2910888	FQ312003_intergenic_2910835_2910888	FQ312003_intergenic_2910835_2910888	1	1	0	2	0	2	0	0	3	49	58
FQ312003_intergenic_2911725_2911736	FQ312003_intergenic_2911725_2911736	FQ312003_intergenic_2911725_2911736	1	0	0	0	0	0	0	0	0	9	10
FQ312003_intergenic_2914731_2914924	FQ312003_intergenic_2914731_2914924	FQ312003_intergenic_2914731_2914924	5	0	0	2	0	0	0	2	3	162	192
FQ312003_intergenic_2918366_2918394	FQ312003_intergenic_2918366_2918394	FQ312003_intergenic_2918366_2918394	0	0	0	0	0	0	0	0	1	2	1
FQ312003_intergenic_2920037_2920158	FQ312003_intergenic_2920037_2920158	FQ312003_intergenic_2920037_2920158	1	1	0	2	0	0	4	0	0	4	7
FQ312003_intergenic_2921939_2922954	FQ312003_intergenic_2921939_2922954	FQ312003_intergenic_2921939_2922954	16	3	2	6	2	0	0	0	6	189	198
FQ312003_intergenic_2923931_2923995	FQ312003_intergenic_2923931_2923995	FQ312003_intergenic_2923931_2923995	2	1	0	0	0	0	0	0	0	141	47
FQ312003_intergenic_2925971_2926129	FQ312003_intergenic_2925971_2926129	FQ312003_intergenic_2925971_2926129	0	0	0	0	4	0	0	0	1	14	7
FQ312003_intergenic_2927514_2927949	FQ312003_intergenic_2927514_2927949	FQ312003_intergenic_2927514_2927949	5	0	2	2	0	2	2	0	6	710	412
FQ312003_intergenic_2929546_2929591	FQ312003_intergenic_2929546_2929591	FQ312003_intergenic_2929546_2929591	1	0	0	0	0	0	0	0	0	8	8
FQ312003_intergenic_2929959_2930310	FQ312003_intergenic_2929959_2930310	FQ312003_intergenic_2929959_2930310	3	0	0	0	0	2	2	0	2	122	62
FQ312003_intergenic_2933029_2933206	FQ312003_intergenic_2933029_2933206	FQ312003_intergenic_2933029_2933206	1	0	0	0	0	0	0	3	0	540	345
FQ312003_intergenic_2934470_2935148	FQ312003_intergenic_2934470_2935148	FQ312003_intergenic_2934470_2935148	2	2	0	1	0	2	4	0	12	1004	768
FQ312003_intergenic_2938041_2938902	FQ312003_intergenic_2938041_2938902	FQ312003_intergenic_2938041_2938902	14	4	0	0	0	0	3	2	7	3913	3254
FQ312003_intergenic_2948396_2949327	FQ312003_intergenic_2948396_2949327	FQ312003_intergenic_2948396_2949327	14	9	32	118	51	85	1	143	404	549	523
FQ312003_intergenic_2950481_2950898	FQ312003_intergenic_2950481_2950898	FQ312003_intergenic_2950481_2950898	5	5	1	2	3	15	6	16	20	336	310
FQ312003_intergenic_2951929_2952120	FQ312003_intergenic_2951929_2952120	FQ312003_intergenic_2951929_2952120	3	5	1	9	3	3	2	6	13	155	98
FQ312003_intergenic_2953118_2953738	FQ312003_intergenic_2953118_2953738	FQ312003_intergenic_2953118_2953738	19	5	2	34	8	7	2	13	38	2132	1607
FQ312003_intergenic_2954853_2954884	FQ312003_intergenic_2954853_2954884	FQ312003_intergenic_2954853_2954884	0	0	0	3	0	0	0	1	1	38	35
FQ312003_intergenic_2957062_2957115	FQ312003_intergenic_2957062_2957115	FQ312003_intergenic_2957062_2957115	0	0	0	0	0	0	0	1	0	48	40
FQ312003_intergenic_2960165_2960357	FQ312003_intergenic_2960165_2960357	FQ312003_intergenic_2960165_2960357	5	0	0	0	3	0	0	0	0	23	40
FQ312003_intergenic_2965507_2965535	FQ312003_intergenic_2965507_2965535	FQ312003_intergenic_2965507_2965535	1	1	0	0	0	0	0	0	1	4	3
FQ312003_intergenic_2968485_2968626	FQ312003_intergenic_2968485_2968626	FQ312003_intergenic_2968485_2968626	1	3	0	0	0	0	0	0	0	37	26
FQ312003_intergenic_2969504_2969750	FQ312003_intergenic_2969504_2969750	FQ312003_intergenic_2969504_2969750	0	2	2	1	3	2	1	2	8	1656	2623
FQ312003_intergenic_2970253_2970850	FQ312003_intergenic_2970253_2970850	FQ312003_intergenic_2970253_2970850	4	2	0	0	0	0	0	1	0	3513	1657
FQ312003_intergenic_2971786_2971834	FQ312003_intergenic_2971786_2971834	FQ312003_intergenic_2971786_2971834	1	0	0	1	0	0	0	0	1	47	87
FQ312003_intergenic_2978223_2978476	FQ312003_intergenic_2978223_2978476	FQ312003_intergenic_2978223_2978476	5	0	0	0	0	0	0	0	0	154	70
FQ312003_intergenic_298129_298180	FQ312003_intergenic_298129_298180	FQ312003_intergenic_298129_298180	3	0	0	0	2	0	0	0	2	11	12
FQ312003_intergenic_2981902_2981965	FQ312003_intergenic_2981902_2981965	FQ312003_intergenic_2981902_2981965	0	2	0	0	0	0	2	0	2	13	7
FQ312003_intergenic_2983251_2983646	FQ312003_intergenic_2983251_2983646	FQ312003_intergenic_2983251_2983646	2	0	0	0	0	0	0	2	2	1004	767
FQ312003_intergenic_2984278_2984303	FQ312003_intergenic_2984278_2984303	FQ312003_intergenic_2984278_2984303	0	1	0	0	0	0	0	0	1	106	281
FQ312003_intergenic_2988551_2988795	FQ312003_intergenic_2988551_2988795	FQ312003_intergenic_2988551_2988795	2	0	0	0	0	0	4	0	3	33	9
FQ312003_intergenic_2989412_2989460	FQ312003_intergenic_2989412_2989460	FQ312003_intergenic_2989412_2989460	0	0	0	2	1	0	0	2	4	81	108
FQ312003_intergenic_2992183_2993476	FQ312003_intergenic_2992183_2993476	FQ312003_intergenic_2992183_2993476	7	6	8	58	22	40	210	42	112	1784	1022
FQ312003_intergenic_2993763_2993896	FQ312003_intergenic_2993763_2993896	FQ312003_intergenic_2993763_2993896	1	0	0	0	0	2	0	4	7	230	276
FQ312003_intergenic_2996628_2996762	FQ312003_intergenic_2996628_2996762	FQ312003_intergenic_2996628_2996762	4	4	0	0	1	0	0	1	2	999	798
FQ312003_intergenic_2997364_2997379	FQ312003_intergenic_2997364_2997379	FQ312003_intergenic_2997364_2997379	0	0	0	0	0	0	0	1	0	15	34
FQ312003_intergenic_2999124_2999500	FQ312003_intergenic_2999124_2999500	FQ312003_intergenic_2999124_2999500	8	0	0	0	2	2	8	1	4	210	270
FQ312003_intergenic_3000681_3000833	FQ312003_intergenic_3000681_3000833	FQ312003_intergenic_3000681_3000833	1	0	0	0	0	0	0	0	2	23	18
FQ312003_intergenic_3004066_3004162	FQ312003_intergenic_3004066_3004162	FQ312003_intergenic_3004066_3004162	1	1	0	0	0	0	0	3	2	159	251
FQ312003_intergenic_3007512_3007596	FQ312003_intergenic_3007512_3007596	FQ312003_intergenic_3007512_3007596	2	0	0	0	0	0	0	0	1	44	39
FQ312003_intergenic_3012604_3012648	FQ312003_intergenic_3012604_3012648	FQ312003_intergenic_3012604_3012648	0	0	0	0	0	2	0	0	0	9	26
FQ312003_intergenic_3013295_3013394	FQ312003_intergenic_3013295_3013394	FQ312003_intergenic_3013295_3013394	0	0	0	0	0	1	0	0	1	10	5
FQ312003_intergenic_3021608_3021652	FQ312003_intergenic_3021608_3021652	FQ312003_intergenic_3021608_3021652	2	0	0	0	0	0	0	0	1	4	2
FQ312003_intergenic_3022215_3022323	FQ312003_intergenic_3022215_3022323	FQ312003_intergenic_3022215_3022323	2	2	0	0	2	0	0	0	0	6	6
FQ312003_intergenic_3026113_3026230	FQ312003_intergenic_3026113_3026230	FQ312003_intergenic_3026113_3026230	1	0	0	3	0	0	0	0	1	243	177
FQ312003_intergenic_3028816_3028896	FQ312003_intergenic_3028816_3028896	FQ312003_intergenic_3028816_3028896	1	0	0	0	0	0	1	0	0	10	2
FQ312003_intergenic_3033433_3033492	FQ312003_intergenic_3033433_3033492	FQ312003_intergenic_3033433_3033492	3	0	0	2	2	0	2	0	2	155	66
FQ312003_intergenic_3034349_3034632	FQ312003_intergenic_3034349_3034632	FQ312003_intergenic_3034349_3034632	3	0	0	0	0	0	0	0	0	852	225
FQ312003_intergenic_3035621_3035864	FQ312003_intergenic_3035621_3035864	FQ312003_intergenic_3035621_3035864	6	2	0	0	1	2	2	0	3	837	193
FQ312003_intergenic_3040147_3040361	FQ312003_intergenic_3040147_3040361	FQ312003_intergenic_3040147_3040361	4	0	0	0	0	4	2	0	1	3878	2068
FQ312003_intergenic_3041392_3042381	FQ312003_intergenic_3041392_3042381	FQ312003_intergenic_3041392_3042381	6	5	0	0	0	0	2	0	8	4978	2689
FQ312003_intergenic_304175_304605	FQ312003_intergenic_304175_304605	FQ312003_intergenic_304175_304605	9	0	2	0	0	0	0	1	0	487	403
FQ312003_intergenic_3046708_3046937	FQ312003_intergenic_3046708_3046937	FQ312003_intergenic_3046708_3046937	2	2	0	0	6	5	0	5	10	2894	2301
FQ312003_intergenic_3054022_3054058	FQ312003_intergenic_3054022_3054058	FQ312003_intergenic_3054022_3054058	1	1	0	0	1	0	0	0	1	893	314
FQ312003_intergenic_3066559_3066914	FQ312003_intergenic_3066559_3066914	FQ312003_intergenic_3066559_3066914	1	2	0	0	0	0	16	0	1	4139	2251
FQ312003_intergenic_3067459_3067788	FQ312003_intergenic_3067459_3067788	FQ312003_intergenic_3067459_3067788	6	2	0	2	0	0	0	3	6	939	582
FQ312003_intergenic_3068671_3068842	FQ312003_intergenic_3068671_3068842	FQ312003_intergenic_3068671_3068842	5	0	0	0	0	0	1	2	0	52	123
FQ312003_intergenic_3069270_3069409	FQ312003_intergenic_3069270_3069409	FQ312003_intergenic_3069270_3069409	0	1	0	0	1	0	1	0	2	180	116
FQ312003_intergenic_3069618_3069857	FQ312003_intergenic_3069618_3069857	FQ312003_intergenic_3069618_3069857	1	2	0	0	0	0	0	2	0	37	37
FQ312003_intergenic_3071063_3071296	FQ312003_intergenic_3071063_3071296	FQ312003_intergenic_3071063_3071296	3	0	0	0	0	0	1	0	0	73	62
FQ312003_intergenic_3072054_3072124	FQ312003_intergenic_3072054_3072124	FQ312003_intergenic_3072054_3072124	0	0	0	0	0	0	0	0	0	10	3
FQ312003_intergenic_3072747_3072846	FQ312003_intergenic_3072747_3072846	FQ312003_intergenic_3072747_3072846	4	0	0	0	2	2	0	0	0	523	329
FQ312003_intergenic_3084239_3084334	FQ312003_intergenic_3084239_3084334	FQ312003_intergenic_3084239_3084334	3	0	0	0	1	0	2	0	0	17	9
FQ312003_intergenic_3085623_3085692	FQ312003_intergenic_3085623_3085692	FQ312003_intergenic_3085623_3085692	3	1	0	0	0	0	0	0	0	2	5
FQ312003_intergenic_3090294_3090368	FQ312003_intergenic_3090294_3090368	FQ312003_intergenic_3090294_3090368	2	0	0	0	0	0	0	0	0	89	119
FQ312003_intergenic_3094397_3094486	FQ312003_intergenic_3094397_3094486	FQ312003_intergenic_3094397_3094486	0	0	0	0	0	0	0	0	0	32	52
FQ312003_intergenic_3097911_3098060	FQ312003_intergenic_3097911_3098060	FQ312003_intergenic_3097911_3098060	4	0	0	0	0	0	2	0	0	140	157
FQ312003_intergenic_3099208_3100205	FQ312003_intergenic_3099208_3100205	FQ312003_intergenic_3099208_3100205	16	4	0	0	5	4	6	0	2	46	71
FQ312003_intergenic_310868_311134	FQ312003_intergenic_310868_311134	FQ312003_intergenic_310868_311134	0	2	0	0	0	0	0	2	3	484	78
FQ312003_intergenic_3108766_3109109	FQ312003_intergenic_3108766_3109109	FQ312003_intergenic_3108766_3109109	1	4	0	2	0	0	0	0	2	74	12
FQ312003_intergenic_3114393_3114895	FQ312003_intergenic_3114393_3114895	FQ312003_intergenic_3114393_3114895	5	0	0	1	2	0	2	4	4	159	108
FQ312003_intergenic_3116244_3117969	FQ312003_intergenic_3116244_3117969	FQ312003_intergenic_3116244_3117969	20	8	2	2	4	0	4	2	10	406	412
FQ312003_intergenic_3118742_3118776	FQ312003_intergenic_3118742_3118776	FQ312003_intergenic_3118742_3118776	1	0	0	0	0	0	0	0	0	12	18
FQ312003_intergenic_3121896_3122022	FQ312003_intergenic_3121896_3122022	FQ312003_intergenic_3121896_3122022	4	1	0	3	3	2	1	0	4	1216	951
FQ312003_intergenic_3122924_3123476	FQ312003_intergenic_3122924_3123476	FQ312003_intergenic_3122924_3123476	6	0	0	0	0	0	2	0	3	204	122
FQ312003_intergenic_3124229_3124292	FQ312003_intergenic_3124229_3124292	FQ312003_intergenic_3124229_3124292	0	0	1	0	0	0	0	0	0	16	13
FQ312003_intergenic_3136109_3136488	FQ312003_intergenic_3136109_3136488	FQ312003_intergenic_3136109_3136488	5	8	1	0	0	0	3	1	2	83	105
FQ312003_intergenic_3138169_3138679	FQ312003_intergenic_3138169_3138679	FQ312003_intergenic_3138169_3138679	12	14	27	89	90	117	72	238	570	62688	36711
FQ312003_intergenic_3140243_3140254	FQ312003_intergenic_3140243_3140254	FQ312003_intergenic_3140243_3140254	2	2	0	2	0	0	0	0	1	50	77
FQ312003_intergenic_3141720_3142183	FQ312003_intergenic_3141720_3142183	FQ312003_intergenic_3141720_3142183	6	3	4	3	0	0	1	5	7	3487	2270
FQ312003_intergenic_3147830_3148283	FQ312003_intergenic_3147830_3148283	FQ312003_intergenic_3147830_3148283	2	0	0	2	0	0	0	2	0	28	14
FQ312003_intergenic_3156702_3156947	FQ312003_intergenic_3156702_3156947	FQ312003_intergenic_3156702_3156947	0	3	4	6	5	8	42	2	20	3309	3846
FQ312003_intergenic_3157276_3157367	FQ312003_intergenic_3157276_3157367	FQ312003_intergenic_3157276_3157367	1	0	0	0	0	1	2	1	0	1974	871
FQ312003_intergenic_3159117_3159288	FQ312003_intergenic_3159117_3159288	FQ312003_intergenic_3159117_3159288	3	1	0	0	0	1	0	2	0	715	338
FQ312003_intergenic_316034_316118	FQ312003_intergenic_316034_316118	FQ312003_intergenic_316034_316118	4	0	0	0	0	0	1	0	1	101	66
FQ312003_intergenic_3162369_3162767	FQ312003_intergenic_3162369_3162767	FQ312003_intergenic_3162369_3162767	4	3	0	2	2	2	56	22	18	878	696
FQ312003_intergenic_3164122_3164253	FQ312003_intergenic_3164122_3164253	FQ312003_intergenic_3164122_3164253	2	0	0	0	1	0	0	0	0	185	131
FQ312003_intergenic_316666_316818	FQ312003_intergenic_316666_316818	FQ312003_intergenic_316666_316818	0	1	0	0	0	0	0	0	0	23	4
FQ312003_intergenic_3174047_3174123	FQ312003_intergenic_3174047_3174123	FQ312003_intergenic_3174047_3174123	0	0	0	0	0	0	0	2	3	89	75
FQ312003_intergenic_317405_317608	FQ312003_intergenic_317405_317608	FQ312003_intergenic_317405_317608	0	0	0	0	0	0	1	0	0	3	6
FQ312003_intergenic_3179345_3179428	FQ312003_intergenic_3179345_3179428	FQ312003_intergenic_3179345_3179428	3	0	0	0	0	0	3	0	0	1	5
FQ312003_intergenic_3181206_3181320	FQ312003_intergenic_3181206_3181320	FQ312003_intergenic_3181206_3181320	2	1	0	0	0	4	0	2	2	102	68
FQ312003_intergenic_3184211_3184792	FQ312003_intergenic_3184211_3184792	FQ312003_intergenic_3184211_3184792	0	7	2	0	5	0	4	0	4	380	347
FQ312003_intergenic_3185589_3185669	FQ312003_intergenic_3185589_3185669	FQ312003_intergenic_3185589_3185669	2	0	0	0	0	0	0	0	1	37	102
FQ312003_intergenic_318563_318604	FQ312003_intergenic_318563_318604	FQ312003_intergenic_318563_318604	0	0	0	0	0	0	1	0	1	9	3
FQ312003_intergenic_3186484_3186552	FQ312003_intergenic_3186484_3186552	FQ312003_intergenic_3186484_3186552	0	0	0	0	0	0	0	0	0	66	34
FQ312003_intergenic_3186872_3186961	FQ312003_intergenic_3186872_3186961	FQ312003_intergenic_3186872_3186961	3	0	0	0	0	1	0	2	0	295	242
FQ312003_intergenic_3191544_3192035	FQ312003_intergenic_3191544_3192035	FQ312003_intergenic_3191544_3192035	2	2	0	2	0	0	24	2	5	133	91
FQ312003_intergenic_3195470_3195486	FQ312003_intergenic_3195470_3195486	FQ312003_intergenic_3195470_3195486	2	0	0	0	0	1	0	0	0	6	5
FQ312003_intergenic_3197202_3197213	FQ312003_intergenic_3197202_3197213	FQ312003_intergenic_3197202_3197213	0	0	0	2	1	0	0	0	0	9	10
FQ312003_intergenic_3198733_3198985	FQ312003_intergenic_3198733_3198985	FQ312003_intergenic_3198733_3198985	0	3	0	0	1	0	0	0	6	246	98
FQ312003_intergenic_3200741_3201069	FQ312003_intergenic_3200741_3201069	FQ312003_intergenic_3200741_3201069	0	2	0	2	0	0	0	0	4	24	21
FQ312003_intergenic_3202349_3202370	FQ312003_intergenic_3202349_3202370	FQ312003_intergenic_3202349_3202370	2	1	0	0	0	1	1	1	0	6	15
FQ312003_intergenic_3203894_3203934	FQ312003_intergenic_3203894_3203934	FQ312003_intergenic_3203894_3203934	1	0	0	0	0	0	0	0	0	178	175
FQ312003_intergenic_3205568_3205588	FQ312003_intergenic_3205568_3205588	FQ312003_intergenic_3205568_3205588	2	0	0	0	0	0	0	0	0	8	15
FQ312003_intergenic_3206526_3206634	FQ312003_intergenic_3206526_3206634	FQ312003_intergenic_3206526_3206634	2	0	0	0	0	0	0	0	0	234	278
FQ312003_intergenic_3207993_3208035	FQ312003_intergenic_3207993_3208035	FQ312003_intergenic_3207993_3208035	0	1	0	0	0	0	0	3	1	110	41
FQ312003_intergenic_3212483_3212501	FQ312003_intergenic_3212483_3212501	FQ312003_intergenic_3212483_3212501	1	3	0	0	0	0	3	0	1	0	2
FQ312003_intergenic_3213313_3213804	FQ312003_intergenic_3213313_3213804	FQ312003_intergenic_3213313_3213804	6	0	0	0	1	2	0	0	3	32	12
FQ312003_intergenic_3215121_3215825	FQ312003_intergenic_3215121_3215825	FQ312003_intergenic_3215121_3215825	8	8	0	0	3	2	2	2	11	372	354
FQ312003_intergenic_3216552_3217153	FQ312003_intergenic_3216552_3217153	FQ312003_intergenic_3216552_3217153	3	0	0	0	0	0	2	2	0	110	109
FQ312003_intergenic_3218061_3218244	FQ312003_intergenic_3218061_3218244	FQ312003_intergenic_3218061_3218244	2	1	0	3	0	1	2	9	16	1684	773
FQ312003_intergenic_3219104_3219267	FQ312003_intergenic_3219104_3219267	FQ312003_intergenic_3219104_3219267	6	5	0	0	0	0	0	0	5	70	46
FQ312003_intergenic_3222398_3222618	FQ312003_intergenic_3222398_3222618	FQ312003_intergenic_3222398_3222618	2	0	0	2	6	0	1	8	20	310	213
FQ312003_intergenic_3226092_3226103	FQ312003_intergenic_3226092_3226103	FQ312003_intergenic_3226092_3226103	0	0	0	0	0	0	0	0	0	27	31
FQ312003_intergenic_3227439_3227587	FQ312003_intergenic_3227439_3227587	FQ312003_intergenic_3227439_3227587	2	2	0	0	0	0	2	4	0	691	358
FQ312003_intergenic_3228669_3228683	FQ312003_intergenic_3228669_3228683	FQ312003_intergenic_3228669_3228683	2	0	1	0	0	0	0	1	0	15	46
FQ312003_intergenic_3229444_3229506	FQ312003_intergenic_3229444_3229506	FQ312003_intergenic_3229444_3229506	1	2	0	0	0	0	1	0	0	89	118
FQ312003_intergenic_3229919_3229976	FQ312003_intergenic_3229919_3229976	FQ312003_intergenic_3229919_3229976	0	2	0	0	1	0	0	4	2	435	461
FQ312003_intergenic_323220_323321	FQ312003_intergenic_323220_323321	FQ312003_intergenic_323220_323321	7	2	0	0	0	0	0	0	0	30	4
FQ312003_intergenic_3232452_3232806	FQ312003_intergenic_3232452_3232806	FQ312003_intergenic_3232452_3232806	1	5	0	0	0	0	0	0	4	247	149
FQ312003_intergenic_3235781_3235842	FQ312003_intergenic_3235781_3235842	FQ312003_intergenic_3235781_3235842	1	0	0	1	0	2	3	1	1	240	567
FQ312003_intergenic_3237453_3237806	FQ312003_intergenic_3237453_3237806	FQ312003_intergenic_3237453_3237806	4	1	1	2	1	0	0	1	17	1485	1217
FQ312003_intergenic_3239110_3239134	FQ312003_intergenic_3239110_3239134	FQ312003_intergenic_3239110_3239134	3	1	0	0	0	0	3	0	1	4	3
FQ312003_intergenic_3241553_3241651	FQ312003_intergenic_3241553_3241651	FQ312003_intergenic_3241553_3241651	12	3	0	0	0	2	2	1	1	617	817
FQ312003_intergenic_3242331_3242396	FQ312003_intergenic_3242331_3242396	FQ312003_intergenic_3242331_3242396	1	2	0	0	2	2	0	0	0	143	140
FQ312003_intergenic_3242827_3243091	FQ312003_intergenic_3242827_3243091	FQ312003_intergenic_3242827_3243091	7	4	4	47	12	71	4	179	249	11325	10330
FQ312003_intergenic_3243669_3243948	FQ312003_intergenic_3243669_3243948	FQ312003_intergenic_3243669_3243948	2	3	4	2	0	0	2	2	8	268	247
FQ312003_intergenic_3245282_3245446	FQ312003_intergenic_3245282_3245446	FQ312003_intergenic_3245282_3245446	5	0	0	0	0	0	0	3	0	113	101
FQ312003_intergenic_3246207_3246259	FQ312003_intergenic_3246207_3246259	FQ312003_intergenic_3246207_3246259	4	0	0	0	0	0	1	1	0	20	22
FQ312003_intergenic_3247254_3247418	FQ312003_intergenic_3247254_3247418	FQ312003_intergenic_3247254_3247418	7	0	1	0	0	0	0	0	0	48	92
FQ312003_intergenic_3248995_3249093	FQ312003_intergenic_3248995_3249093	FQ312003_intergenic_3248995_3249093	3	0	0	0	0	0	0	1	2	36	29
FQ312003_intergenic_3250055_3250180	FQ312003_intergenic_3250055_3250180	FQ312003_intergenic_3250055_3250180	0	1	0	0	1	0	0	0	0	34	17
FQ312003_intergenic_3253694_3253966	FQ312003_intergenic_3253694_3253966	FQ312003_intergenic_3253694_3253966	3	5	0	0	0	0	0	0	2	61	50
FQ312003_intergenic_3259110_3259329	FQ312003_intergenic_3259110_3259329	FQ312003_intergenic_3259110_3259329	3	3	1	0	2	1	0	0	7	1687	1218
FQ312003_intergenic_3261210_3261313	FQ312003_intergenic_3261210_3261313	FQ312003_intergenic_3261210_3261313	0	0	0	0	0	0	0	0	0	50	28
FQ312003_intergenic_3262305_3262483	FQ312003_intergenic_3262305_3262483	FQ312003_intergenic_3262305_3262483	2	0	0	0	0	0	0	0	0	44	32
FQ312003_intergenic_3266609_3267749	FQ312003_intergenic_3266609_3267749	FQ312003_intergenic_3266609_3267749	8	2	0	0	4	2	4	4	5	3062	1644
FQ312003_intergenic_3268600_3268703	FQ312003_intergenic_3268600_3268703	FQ312003_intergenic_3268600_3268703	1	0	0	0	0	0	0	0	4	18	28
FQ312003_intergenic_3269536_3269578	FQ312003_intergenic_3269536_3269578	FQ312003_intergenic_3269536_3269578	1	0	0	0	0	0	0	0	0	3	6
FQ312003_intergenic_3271796_3271989	FQ312003_intergenic_3271796_3271989	FQ312003_intergenic_3271796_3271989	2	0	2	4	0	4	4	10	23	2634	1616
FQ312003_intergenic_3273600_3274030	FQ312003_intergenic_3273600_3274030	FQ312003_intergenic_3273600_3274030	2	3	2	6	3	1	4	6	5	227	281
FQ312003_intergenic_3278640_3278754	FQ312003_intergenic_3278640_3278754	FQ312003_intergenic_3278640_3278754	3	1	0	0	0	0	0	2	3	24	93
FQ312003_intergenic_3280568_3280598	FQ312003_intergenic_3280568_3280598	FQ312003_intergenic_3280568_3280598	1	0	0	0	0	0	0	0	0	43	13
FQ312003_intergenic_3286102_3286133	FQ312003_intergenic_3286102_3286133	FQ312003_intergenic_3286102_3286133	0	2	0	0	0	0	0	0	0	7	9
FQ312003_intergenic_3287281_3287368	FQ312003_intergenic_3287281_3287368	FQ312003_intergenic_3287281_3287368	2	0	0	0	0	0	1	2	0	40	22
FQ312003_intergenic_3289284_3289337	FQ312003_intergenic_3289284_3289337	FQ312003_intergenic_3289284_3289337	2	0	0	0	4	0	0	0	2	60	74
FQ312003_intergenic_3290794_3290805	FQ312003_intergenic_3290794_3290805	FQ312003_intergenic_3290794_3290805	1	0	0	1	0	0	0	0	1	73	122
FQ312003_intergenic_3291992_3292107	FQ312003_intergenic_3291992_3292107	FQ312003_intergenic_3291992_3292107	0	0	0	0	0	0	0	0	0	72	42
FQ312003_intergenic_329503_329798	FQ312003_intergenic_329503_329798	FQ312003_intergenic_329503_329798	4	2	0	0	1	0	0	0	0	171	56
FQ312003_intergenic_3295662_3295985	FQ312003_intergenic_3295662_3295985	FQ312003_intergenic_3295662_3295985	3	1	0	4	1	0	1	3	17	4194	2878
FQ312003_intergenic_3296794_3297032	FQ312003_intergenic_3296794_3297032	FQ312003_intergenic_3296794_3297032	8	24	23	61	44	47	2	67	67	2920	814
FQ312003_intergenic_3300322_3300462	FQ312003_intergenic_3300322_3300462	FQ312003_intergenic_3300322_3300462	6	1	0	0	0	1	0	0	0	49	68
FQ312003_intergenic_3304332_3304742	FQ312003_intergenic_3304332_3304742	FQ312003_intergenic_3304332_3304742	3	0	0	0	0	0	0	0	0	290	187
FQ312003_intergenic_33045_33313	FQ312003_intergenic_33045_33313	FQ312003_intergenic_33045_33313	0	2	0	0	0	0	0	0	0	85	22
FQ312003_intergenic_3307665_3307772	FQ312003_intergenic_3307665_3307772	FQ312003_intergenic_3307665_3307772	2	0	0	0	2	0	0	0	2	19	29
FQ312003_intergenic_3309564_3309624	FQ312003_intergenic_3309564_3309624	FQ312003_intergenic_3309564_3309624	0	0	0	0	0	0	0	0	0	10	10
FQ312003_intergenic_3311210_3311244	FQ312003_intergenic_3311210_3311244	FQ312003_intergenic_3311210_3311244	1	1	0	0	0	1	0	0	1	61	72
FQ312003_intergenic_3312211_3312835	FQ312003_intergenic_3312211_3312835	FQ312003_intergenic_3312211_3312835	11	6	2	3	2	0	0	4	4	646	442
FQ312003_intergenic_3314777_3315071	FQ312003_intergenic_3314777_3315071	FQ312003_intergenic_3314777_3315071	7	0	0	0	0	0	2	0	0	33	18
FQ312003_intergenic_3316477_3316780	FQ312003_intergenic_3316477_3316780	FQ312003_intergenic_3316477_3316780	5	1	0	0	0	0	0	0	3	63	40
FQ312003_intergenic_3321073_3321271	FQ312003_intergenic_3321073_3321271	FQ312003_intergenic_3321073_3321271	9	2	0	3	0	0	4	1	1	40	51
FQ312003_intergenic_3322431_3322999	FQ312003_intergenic_3322431_3322999	FQ312003_intergenic_3322431_3322999	4	2	0	0	0	2	4	0	0	737	199
FQ312003_intergenic_3324957_3325082	FQ312003_intergenic_3324957_3325082	FQ312003_intergenic_3324957_3325082	1	3	0	0	0	0	0	0	2	107	92
FQ312003_intergenic_3334516_3334604	FQ312003_intergenic_3334516_3334604	FQ312003_intergenic_3334516_3334604	0	0	0	0	0	0	0	1	1	1693	592
FQ312003_intergenic_3336721_3336926	FQ312003_intergenic_3336721_3336926	FQ312003_intergenic_3336721_3336926	11	0	0	0	2	0	0	0	1	292	240
FQ312003_intergenic_3337522_3337700	FQ312003_intergenic_3337522_3337700	FQ312003_intergenic_3337522_3337700	3	0	0	0	0	0	0	6	2	92	116
FQ312003_intergenic_3339210_3339232	FQ312003_intergenic_3339210_3339232	FQ312003_intergenic_3339210_3339232	0	1	0	0	0	0	0	0	0	31	73
FQ312003_intergenic_3340218_3340229	FQ312003_intergenic_3340218_3340229	FQ312003_intergenic_3340218_3340229	1	1	0	0	1	0	1	0	0	7	3
FQ312003_intergenic_3342936_3342974	FQ312003_intergenic_3342936_3342974	FQ312003_intergenic_3342936_3342974	1	0	0	0	0	0	0	0	2	89	86
FQ312003_intergenic_3344716_3344789	FQ312003_intergenic_3344716_3344789	FQ312003_intergenic_3344716_3344789	2	0	0	0	2	0	0	0	0	28	18
FQ312003_intergenic_3346987_3347235	FQ312003_intergenic_3346987_3347235	FQ312003_intergenic_3346987_3347235	2	0	0	2	0	0	0	1	0	8	13
FQ312003_intergenic_3349138_3349591	FQ312003_intergenic_3349138_3349591	FQ312003_intergenic_3349138_3349591	2	1	0	0	1	0	2	1	0	353	217
FQ312003_intergenic_3351864_3352250	FQ312003_intergenic_3351864_3352250	FQ312003_intergenic_3351864_3352250	6	0	0	0	0	0	0	0	3	123	86
FQ312003_intergenic_3357445_3357600	FQ312003_intergenic_3357445_3357600	FQ312003_intergenic_3357445_3357600	6	0	0	0	0	0	3	2	0	140	124
FQ312003_intergenic_3361401_3361451	FQ312003_intergenic_3361401_3361451	FQ312003_intergenic_3361401_3361451	0	0	0	0	0	0	0	0	0	14	12
FQ312003_intergenic_3364592_3364615	FQ312003_intergenic_3364592_3364615	FQ312003_intergenic_3364592_3364615	0	0	0	2	0	1	0	0	1	22	25
FQ312003_intergenic_3369121_3369220	FQ312003_intergenic_3369121_3369220	FQ312003_intergenic_3369121_3369220	1	0	0	2	0	0	0	2	2	1685	1581
FQ312003_intergenic_3370797_3370908	FQ312003_intergenic_3370797_3370908	FQ312003_intergenic_3370797_3370908	2	0	0	0	0	0	0	0	0	23	47
FQ312003_intergenic_3374614_3375155	FQ312003_intergenic_3374614_3375155	FQ312003_intergenic_3374614_3375155	6	2	0	0	0	3	2	0	0	279	222
FQ312003_intergenic_337804_338214	FQ312003_intergenic_337804_338214	FQ312003_intergenic_337804_338214	7	3	0	0	4	0	0	0	3	395	358
FQ312003_intergenic_3378436_3378505	FQ312003_intergenic_3378436_3378505	FQ312003_intergenic_3378436_3378505	0	0	0	0	0	0	1	0	1	3	1
FQ312003_intergenic_3379260_3379595	FQ312003_intergenic_3379260_3379595	FQ312003_intergenic_3379260_3379595	5	4	0	2	2	4	0	13	29	2338	2559
FQ312003_intergenic_3380279_3380435	FQ312003_intergenic_3380279_3380435	FQ312003_intergenic_3380279_3380435	0	0	0	0	1	1	0	0	1	276	145
FQ312003_intergenic_3382855_3383213	FQ312003_intergenic_3382855_3383213	FQ312003_intergenic_3382855_3383213	4	0	0	0	3	2	0	6	17	167	149
FQ312003_intergenic_3387639_3387655	FQ312003_intergenic_3387639_3387655	FQ312003_intergenic_3387639_3387655	2	1	0	0	0	0	0	0	2	38	49
FQ312003_intergenic_338804_339471	FQ312003_intergenic_338804_339471	FQ312003_intergenic_338804_339471	13	0	0	0	0	0	0	2	2	123	108
FQ312003_intergenic_3389058_3389198	FQ312003_intergenic_3389058_3389198	FQ312003_intergenic_3389058_3389198	9	0	0	0	1	2	1	0	10	540	476
FQ312003_intergenic_3393319_3393468	FQ312003_intergenic_3393319_3393468	FQ312003_intergenic_3393319_3393468	2	1	0	1	1	1	0	6	6	190	397
FQ312003_intergenic_3394583_3394709	FQ312003_intergenic_3394583_3394709	FQ312003_intergenic_3394583_3394709	1	0	0	0	2	2	0	2	8	252	143
FQ312003_intergenic_3395026_3395160	FQ312003_intergenic_3395026_3395160	FQ312003_intergenic_3395026_3395160	0	0	4	6	1	3	6	1	14	348	465
FQ312003_intergenic_3397007_3397055	FQ312003_intergenic_3397007_3397055	FQ312003_intergenic_3397007_3397055	1	1	0	2	3	4	1	0	3	245	266
FQ312003_intergenic_3399004_3399026	FQ312003_intergenic_3399004_3399026	FQ312003_intergenic_3399004_3399026	0	3	0	0	0	1	0	2	1	38	45
FQ312003_intergenic_3399634_3399813	FQ312003_intergenic_3399634_3399813	FQ312003_intergenic_3399634_3399813	0	0	0	0	0	0	0	0	2	50	87
FQ312003_intergenic_3400682_3400812	FQ312003_intergenic_3400682_3400812	FQ312003_intergenic_3400682_3400812	13	1	0	0	1	0	0	0	0	22	14
FQ312003_intergenic_3403123_3403409	FQ312003_intergenic_3403123_3403409	FQ312003_intergenic_3403123_3403409	10	0	0	0	0	0	0	0	3	460	254
FQ312003_intergenic_340424_340459	FQ312003_intergenic_340424_340459	FQ312003_intergenic_340424_340459	1	0	0	0	1	0	1	0	0	7	18
FQ312003_intergenic_3405031_3405449	FQ312003_intergenic_3405031_3405449	FQ312003_intergenic_3405031_3405449	4	3	2	2	0	0	0	4	7	722	536
FQ312003_intergenic_3406840_3406909	FQ312003_intergenic_3406840_3406909	FQ312003_intergenic_3406840_3406909	1	0	3	0	2	1	0	0	5	43	39
FQ312003_intergenic_3410246_3410281	FQ312003_intergenic_3410246_3410281	FQ312003_intergenic_3410246_3410281	2	0	0	0	0	0	0	0	0	106	178
FQ312003_intergenic_341026_341636	FQ312003_intergenic_341026_341636	FQ312003_intergenic_341026_341636	8	0	2	0	0	0	0	5	6	120	53
FQ312003_intergenic_3410829_3410879	FQ312003_intergenic_3410829_3410879	FQ312003_intergenic_3410829_3410879	1	0	0	0	2	0	1	0	1	179	200
FQ312003_intergenic_3412760_3412931	FQ312003_intergenic_3412760_3412931	FQ312003_intergenic_3412760_3412931	0	1	0	0	0	0	2	0	0	17	11
FQ312003_intergenic_3414001_3414154	FQ312003_intergenic_3414001_3414154	FQ312003_intergenic_3414001_3414154	1	0	0	2	1	0	2	2	1	316	189
FQ312003_intergenic_3415500_3415848	FQ312003_intergenic_3415500_3415848	FQ312003_intergenic_3415500_3415848	6	2	2	10	1	3	3	0	5	556	750
FQ312003_intergenic_3416999_3417042	FQ312003_intergenic_3416999_3417042	FQ312003_intergenic_3416999_3417042	0	2	0	1	0	0	0	0	2	120	224
FQ312003_intergenic_3417512_3417760	FQ312003_intergenic_3417512_3417760	FQ312003_intergenic_3417512_3417760	12	4	4	4	4	6	2	14	28	3350	3133
FQ312003_intergenic_3418556_3418599	FQ312003_intergenic_3418556_3418599	FQ312003_intergenic_3418556_3418599	0	1	0	0	0	0	2	0	2	6	1
FQ312003_intergenic_3420240_3420262	FQ312003_intergenic_3420240_3420262	FQ312003_intergenic_3420240_3420262	2	1	0	0	0	0	0	1	0	35	27
FQ312003_intergenic_3422658_3422669	FQ312003_intergenic_3422658_3422669	FQ312003_intergenic_3422658_3422669	4	1	0	0	0	0	0	0	0	7	8
FQ312003_intergenic_3425438_3425652	FQ312003_intergenic_3425438_3425652	FQ312003_intergenic_3425438_3425652	0	0	0	1	0	1	0	0	1	91	68
FQ312003_intergenic_3434167_3435864	FQ312003_intergenic_3434167_3435864	FQ312003_intergenic_3434167_3435864	56	25	262	538	371	578	36	1375	2455	10871	10750
FQ312003_intergenic_3438841_3439323	FQ312003_intergenic_3438841_3439323	FQ312003_intergenic_3438841_3439323	8	0	0	1	1	2	0	0	0	437	229
FQ312003_intergenic_3440996_3441134	FQ312003_intergenic_3440996_3441134	FQ312003_intergenic_3440996_3441134	0	0	0	0	0	0	2	0	0	53	102
FQ312003_intergenic_3443027_3443259	FQ312003_intergenic_3443027_3443259	FQ312003_intergenic_3443027_3443259	3	0	0	0	0	0	0	2	5	35	22
FQ312003_intergenic_3447387_3447483	FQ312003_intergenic_3447387_3447483	FQ312003_intergenic_3447387_3447483	3	0	0	0	0	0	0	0	0	11	27
FQ312003_intergenic_3452998_3453054	FQ312003_intergenic_3452998_3453054	FQ312003_intergenic_3452998_3453054	2	0	0	0	0	0	0	1	4	125	199
FQ312003_intergenic_3460812_3460927	FQ312003_intergenic_3460812_3460927	FQ312003_intergenic_3460812_3460927	2	1	0	0	0	2	0	0	1	85	48
FQ312003_intergenic_346097_346401	FQ312003_intergenic_346097_346401	FQ312003_intergenic_346097_346401	4	2	0	1	0	0	0	2	3	49	28
FQ312003_intergenic_3462911_3462987	FQ312003_intergenic_3462911_3462987	FQ312003_intergenic_3462911_3462987	0	0	0	0	0	0	0	0	0	2	5
FQ312003_intergenic_3464793_3464850	FQ312003_intergenic_3464793_3464850	FQ312003_intergenic_3464793_3464850	1	2	0	0	0	0	0	0	0	30	9
FQ312003_intergenic_3466703_3466839	FQ312003_intergenic_3466703_3466839	FQ312003_intergenic_3466703_3466839	0	0	0	0	2	0	2	0	1	5	13
FQ312003_intergenic_3468830_3468907	FQ312003_intergenic_3468830_3468907	FQ312003_intergenic_3468830_3468907	0	2	0	2	0	3	1	6	8	252	255
FQ312003_intergenic_3472138_3472278	FQ312003_intergenic_3472138_3472278	FQ312003_intergenic_3472138_3472278	0	9	1	0	0	2	0	1	2	98	119
FQ312003_intergenic_3472649_3472698	FQ312003_intergenic_3472649_3472698	FQ312003_intergenic_3472649_3472698	2	0	0	1	0	0	1	1	4	254	220
FQ312003_intergenic_347324_348037	FQ312003_intergenic_347324_348037	FQ312003_intergenic_347324_348037	3	6	0	0	1	2	6	7	5	346	220
FQ312003_intergenic_3474145_3474264	FQ312003_intergenic_3474145_3474264	FQ312003_intergenic_3474145_3474264	0	0	0	0	1	0	3	0	2	10	15
FQ312003_intergenic_3479021_3479577	FQ312003_intergenic_3479021_3479577	FQ312003_intergenic_3479021_3479577	9	2	0	2	0	0	4	7	10	1433	973
FQ312003_intergenic_3482172_3482506	FQ312003_intergenic_3482172_3482506	FQ312003_intergenic_3482172_3482506	6	1	0	2	0	0	11	1	2	83	57
FQ312003_intergenic_3482940_3483061	FQ312003_intergenic_3482940_3483061	FQ312003_intergenic_3482940_3483061	2	0	2	0	0	1	0	3	5	1196	642
FQ312003_intergenic_3485341_3485386	FQ312003_intergenic_3485341_3485386	FQ312003_intergenic_3485341_3485386	0	0	0	2	0	0	0	0	0	37	28
FQ312003_intergenic_3485946_3486055	FQ312003_intergenic_3485946_3486055	FQ312003_intergenic_3485946_3486055	0	0	0	0	0	0	0	0	7	22	24
FQ312003_intergenic_34867_35288	FQ312003_intergenic_34867_35288	FQ312003_intergenic_34867_35288	9	4	0	0	0	2	0	2	2	19	7
FQ312003_intergenic_3488821_3488846	FQ312003_intergenic_3488821_3488846	FQ312003_intergenic_3488821_3488846	2	0	0	0	0	0	0	1	1	563	467
FQ312003_intergenic_3489241_3489295	FQ312003_intergenic_3489241_3489295	FQ312003_intergenic_3489241_3489295	1	0	0	0	1	0	0	0	1	99	121
FQ312003_intergenic_3489873_3490019	FQ312003_intergenic_3489873_3490019	FQ312003_intergenic_3489873_3490019	0	0	0	2	2	2	2	1	1	375	468
FQ312003_intergenic_349086_349101	FQ312003_intergenic_349086_349101	FQ312003_intergenic_349086_349101	0	1	0	0	0	0	0	0	1	46	49
FQ312003_intergenic_3491554_3491584	FQ312003_intergenic_3491554_3491584	FQ312003_intergenic_3491554_3491584	0	0	0	0	0	0	0	0	0	23	15
FQ312003_intergenic_3494557_3494713	FQ312003_intergenic_3494557_3494713	FQ312003_intergenic_3494557_3494713	0	0	0	0	0	1	0	0	4	638	383
FQ312003_intergenic_3495786_3495916	FQ312003_intergenic_3495786_3495916	FQ312003_intergenic_3495786_3495916	3	2	0	0	0	0	0	0	0	20	44
FQ312003_intergenic_3497969_3498016	FQ312003_intergenic_3497969_3498016	FQ312003_intergenic_3497969_3498016	1	0	0	0	0	0	1	0	3	12	18
FQ312003_intergenic_3501226_3501379	FQ312003_intergenic_3501226_3501379	FQ312003_intergenic_3501226_3501379	1	3	0	0	0	0	0	0	2	171	138
FQ312003_intergenic_350141_350370	FQ312003_intergenic_350141_350370	FQ312003_intergenic_350141_350370	1	0	0	0	2	8	3	0	4	1472	1167
FQ312003_intergenic_3507621_3507637	FQ312003_intergenic_3507621_3507637	FQ312003_intergenic_3507621_3507637	3	0	0	2	0	1	0	2	5	54	75
FQ312003_intergenic_350879_351148	FQ312003_intergenic_350879_351148	FQ312003_intergenic_350879_351148	8	4	0	0	0	0	0	2	1	179	184
FQ312003_intergenic_3509399_3509546	FQ312003_intergenic_3509399_3509546	FQ312003_intergenic_3509399_3509546	0	1	0	2	2	0	0	0	2	168	81
FQ312003_intergenic_3511733_3511858	FQ312003_intergenic_3511733_3511858	FQ312003_intergenic_3511733_3511858	0	0	4	0	2	0	2	0	3	190	265
FQ312003_intergenic_3515319_3515889	FQ312003_intergenic_3515319_3515889	FQ312003_intergenic_3515319_3515889	10	5	0	0	0	2	2	0	5	185	153
FQ312003_intergenic_3521879_3521984	FQ312003_intergenic_3521879_3521984	FQ312003_intergenic_3521879_3521984	3	0	0	0	0	2	0	0	1	74	65
FQ312003_intergenic_3523189_3523204	FQ312003_intergenic_3523189_3523204	FQ312003_intergenic_3523189_3523204	0	0	0	0	0	0	0	0	1	10	7
FQ312003_intergenic_3529471_3529485	FQ312003_intergenic_3529471_3529485	FQ312003_intergenic_3529471_3529485	0	0	0	0	1	0	1	0	1	9	4
FQ312003_intergenic_3530480_3530513	FQ312003_intergenic_3530480_3530513	FQ312003_intergenic_3530480_3530513	1	2	0	0	0	0	1	0	1	1	1
FQ312003_intergenic_3532659_3532820	FQ312003_intergenic_3532659_3532820	FQ312003_intergenic_3532659_3532820	0	1	0	2	1	0	0	1	6	1412	1299
FQ312003_intergenic_3533674_3533772	FQ312003_intergenic_3533674_3533772	FQ312003_intergenic_3533674_3533772	2	1	0	0	0	0	0	0	0	58	31
FQ312003_intergenic_3534710_3534911	FQ312003_intergenic_3534710_3534911	FQ312003_intergenic_3534710_3534911	4	0	0	4	4	3	1	3	16	2846	1990
FQ312003_intergenic_3536137_3536222	FQ312003_intergenic_3536137_3536222	FQ312003_intergenic_3536137_3536222	0	0	0	0	0	0	1	0	2	922	675
FQ312003_intergenic_3536728_3536783	FQ312003_intergenic_3536728_3536783	FQ312003_intergenic_3536728_3536783	2	1	0	2	0	0	0	0	2	550	600
FQ312003_intergenic_3543562_3543616	FQ312003_intergenic_3543562_3543616	FQ312003_intergenic_3543562_3543616	2	0	0	0	1	0	1	0	2	13	10
FQ312003_intergenic_354570_354708	FQ312003_intergenic_354570_354708	FQ312003_intergenic_354570_354708	2	1	0	0	0	2	1	0	0	33	30
FQ312003_intergenic_3546535_3546644	FQ312003_intergenic_3546535_3546644	FQ312003_intergenic_3546535_3546644	5	0	0	0	0	0	0	0	0	17	32
FQ312003_intergenic_3548027_3548045	FQ312003_intergenic_3548027_3548045	FQ312003_intergenic_3548027_3548045	5	0	0	0	0	0	1	0	1	15	50
FQ312003_intergenic_3549085_3549397	FQ312003_intergenic_3549085_3549397	FQ312003_intergenic_3549085_3549397	4	2	0	2	2	9	2	14	11	4465	3757
FQ312003_intergenic_3549969_3550232	FQ312003_intergenic_3549969_3550232	FQ312003_intergenic_3549969_3550232	2	0	0	2	0	1	0	1	0	664	843
FQ312003_intergenic_3551299_3551369	FQ312003_intergenic_3551299_3551369	FQ312003_intergenic_3551299_3551369	4	0	0	3	0	0	0	1	2	449	196
FQ312003_intergenic_355388_355499	FQ312003_intergenic_355388_355499	FQ312003_intergenic_355388_355499	0	1	0	0	0	0	0	0	0	119	245
FQ312003_intergenic_3554587_3554667	FQ312003_intergenic_3554587_3554667	FQ312003_intergenic_3554587_3554667	1	0	0	0	0	0	2	0	0	123	64
FQ312003_intergenic_3555698_3555719	FQ312003_intergenic_3555698_3555719	FQ312003_intergenic_3555698_3555719	2	0	0	2	0	2	0	0	6	44	51
FQ312003_intergenic_3557266_3557309	FQ312003_intergenic_3557266_3557309	FQ312003_intergenic_3557266_3557309	1	2	0	0	0	0	0	0	3	29	28
FQ312003_intergenic_3561124_3561216	FQ312003_intergenic_3561124_3561216	FQ312003_intergenic_3561124_3561216	3	0	1	2	0	0	0	1	3	16	26
FQ312003_intergenic_3566030_3566236	FQ312003_intergenic_3566030_3566236	FQ312003_intergenic_3566030_3566236	5	0	2	5	2	2	0	2	11	420	572
FQ312003_intergenic_3568278_3568380	FQ312003_intergenic_3568278_3568380	FQ312003_intergenic_3568278_3568380	0	1	0	0	0	0	1	0	5	323	160
FQ312003_intergenic_3569456_3569467	FQ312003_intergenic_3569456_3569467	FQ312003_intergenic_3569456_3569467	1	1	0	0	0	0	0	0	1	37	71
FQ312003_intergenic_357079_357227	FQ312003_intergenic_357079_357227	FQ312003_intergenic_357079_357227	2	0	0	0	0	0	0	1	2	526	358
FQ312003_intergenic_3571173_3571464	FQ312003_intergenic_3571173_3571464	FQ312003_intergenic_3571173_3571464	0	1	0	2	8	2	0	1	7	624	750
FQ312003_intergenic_3576081_3576640	FQ312003_intergenic_3576081_3576640	FQ312003_intergenic_3576081_3576640	4	0	4	2	4	4	0	1	0	134	102
FQ312003_intergenic_3579246_3579295	FQ312003_intergenic_3579246_3579295	FQ312003_intergenic_3579246_3579295	0	1	0	0	0	0	0	1	0	260	131
FQ312003_intergenic_3582161_3582473	FQ312003_intergenic_3582161_3582473	FQ312003_intergenic_3582161_3582473	7	2	0	0	0	0	2	0	2	31	8
FQ312003_intergenic_358384_358489	FQ312003_intergenic_358384_358489	FQ312003_intergenic_358384_358489	0	1	0	0	0	0	1	0	5	381	228
FQ312003_intergenic_3586857_3586991	FQ312003_intergenic_3586857_3586991	FQ312003_intergenic_3586857_3586991	2	0	0	6	1	0	0	4	1	170	221
FQ312003_intergenic_3587314_3593913	FQ312003_intergenic_3587314_3593913	FQ312003_intergenic_3587314_3593913	17050	15219	95158	276298	109998	209655	2964	234596	597284	2114003	1925915
FQ312003_intergenic_3598337_3598367	FQ312003_intergenic_3598337_3598367	FQ312003_intergenic_3598337_3598367	4	0	0	0	2	0	0	1	2	28	25
FQ312003_intergenic_3602680_3602720	FQ312003_intergenic_3602680_3602720	FQ312003_intergenic_3602680_3602720	2	0	0	1	0	0	0	0	0	63	79
FQ312003_intergenic_360346_360400	FQ312003_intergenic_360346_360400	FQ312003_intergenic_360346_360400	1	0	0	1	0	0	0	0	0	7	23
FQ312003_intergenic_3607265_3607310	FQ312003_intergenic_3607265_3607310	FQ312003_intergenic_3607265_3607310	2	0	9	17	2	10	0	10	27	1296	979
FQ312003_intergenic_3612943_3613005	FQ312003_intergenic_3612943_3613005	FQ312003_intergenic_3612943_3613005	2	1	0	1	1	0	1	0	3	302	248
FQ312003_intergenic_3618063_3618341	FQ312003_intergenic_3618063_3618341	FQ312003_intergenic_3618063_3618341	0	0	2	2	2	6	3	6	33	2140	2010
FQ312003_intergenic_361959_362106	FQ312003_intergenic_361959_362106	FQ312003_intergenic_361959_362106	3	3	0	0	0	0	0	0	1	389	388
FQ312003_intergenic_3619650_3619733	FQ312003_intergenic_3619650_3619733	FQ312003_intergenic_3619650_3619733	1	0	0	0	0	0	1	0	0	77	43
FQ312003_intergenic_3624242_3624266	FQ312003_intergenic_3624242_3624266	FQ312003_intergenic_3624242_3624266	1	0	0	1	3	0	1	1	1	890	675
FQ312003_intergenic_3626139_3626302	FQ312003_intergenic_3626139_3626302	FQ312003_intergenic_3626139_3626302	3	1	0	0	0	0	0	4	4	566	1071
FQ312003_intergenic_3627222_3627340	FQ312003_intergenic_3627222_3627340	FQ312003_intergenic_3627222_3627340	0	0	2	10	0	3	0	7	29	917	882
FQ312003_intergenic_3627660_3627746	FQ312003_intergenic_3627660_3627746	FQ312003_intergenic_3627660_3627746	2	0	0	2	0	0	0	3	3	78	241
FQ312003_intergenic_3631100_3631264	FQ312003_intergenic_3631100_3631264	FQ312003_intergenic_3631100_3631264	9	4	0	0	1	2	0	2	2	403	359
FQ312003_intergenic_3633273_3633334	FQ312003_intergenic_3633273_3633334	FQ312003_intergenic_3633273_3633334	0	0	0	0	0	0	1	2	0	30	34
FQ312003_intergenic_3633970_3634066	FQ312003_intergenic_3633970_3634066	FQ312003_intergenic_3633970_3634066	2	0	0	0	0	3	1	0	3	697	545
FQ312003_intergenic_3636871_3637077	FQ312003_intergenic_3636871_3637077	FQ312003_intergenic_3636871_3637077	1	2	2	3	1	2	0	2	9	2122	2252
FQ312003_intergenic_3643328_3643503	FQ312003_intergenic_3643328_3643503	FQ312003_intergenic_3643328_3643503	5	2	0	1	1	0	0	0	1	28	23
FQ312003_intergenic_3644786_3644947	FQ312003_intergenic_3644786_3644947	FQ312003_intergenic_3644786_3644947	1	0	0	0	1	0	2	0	1	50	54
FQ312003_intergenic_3647915_3648079	FQ312003_intergenic_3647915_3648079	FQ312003_intergenic_3647915_3648079	0	0	0	0	3	0	0	0	1	15	6
FQ312003_intergenic_3650375_3650602	FQ312003_intergenic_3650375_3650602	FQ312003_intergenic_3650375_3650602	2	0	0	0	0	0	0	0	2	37	24
FQ312003_intergenic_365561_365742	FQ312003_intergenic_365561_365742	FQ312003_intergenic_365561_365742	2	2	0	0	0	0	2	0	0	128	60
FQ312003_intergenic_3656598_3656628	FQ312003_intergenic_3656598_3656628	FQ312003_intergenic_3656598_3656628	0	0	0	0	0	0	0	0	0	5	3
FQ312003_intergenic_3657188_3657400	FQ312003_intergenic_3657188_3657400	FQ312003_intergenic_3657188_3657400	2	0	0	0	2	0	0	1	0	40	22
FQ312003_intergenic_3657672_3657715	FQ312003_intergenic_3657672_3657715	FQ312003_intergenic_3657672_3657715	0	0	0	0	0	0	2	0	3	23	24
FQ312003_intergenic_3661096_3661175	FQ312003_intergenic_3661096_3661175	FQ312003_intergenic_3661096_3661175	0	0	1	0	1	0	0	1	0	41	37
FQ312003_intergenic_3664318_3664681	FQ312003_intergenic_3664318_3664681	FQ312003_intergenic_3664318_3664681	7	4	0	3	3	7	0	1	6	773	630
FQ312003_intergenic_3671434_3671655	FQ312003_intergenic_3671434_3671655	FQ312003_intergenic_3671434_3671655	2	0	0	0	4	0	0	6	1	1575	735
FQ312003_intergenic_3677756_3678034	FQ312003_intergenic_3677756_3678034	FQ312003_intergenic_3677756_3678034	1	0	0	0	0	2	2	6	7	1075	799
FQ312003_intergenic_3681065_3681077	FQ312003_intergenic_3681065_3681077	FQ312003_intergenic_3681065_3681077	1	0	0	1	0	0	0	2	1	13	28
FQ312003_intergenic_3681898_3682022	FQ312003_intergenic_3681898_3682022	FQ312003_intergenic_3681898_3682022	3	0	0	3	0	3	0	2	5	1696	1203
FQ312003_intergenic_368209_368624	FQ312003_intergenic_368209_368624	FQ312003_intergenic_368209_368624	1	2	2	4	0	2	4	12	23	3160	1890
FQ312003_intergenic_3685026_3685361	FQ312003_intergenic_3685026_3685361	FQ312003_intergenic_3685026_3685361	7	1	0	0	3	5	3	1	9	490	450
FQ312003_intergenic_3688276_3688409	FQ312003_intergenic_3688276_3688409	FQ312003_intergenic_3688276_3688409	3	0	0	0	0	1	0	2	3	20	12
FQ312003_intergenic_3691586_3691909	FQ312003_intergenic_3691586_3691909	FQ312003_intergenic_3691586_3691909	13	1	0	0	0	0	4	1	6	88	48
FQ312003_intergenic_3693279_3693296	FQ312003_intergenic_3693279_3693296	FQ312003_intergenic_3693279_3693296	2	0	0	0	0	0	0	0	0	12	16
FQ312003_intergenic_3697879_3698371	FQ312003_intergenic_3697879_3698371	FQ312003_intergenic_3697879_3698371	2	0	2	0	0	0	1	2	3	718	361
FQ312003_intergenic_3704153_3704396	FQ312003_intergenic_3704153_3704396	FQ312003_intergenic_3704153_3704396	3	6	0	0	1	0	0	2	2	54	51
FQ312003_intergenic_370591_370785	FQ312003_intergenic_370591_370785	FQ312003_intergenic_370591_370785	2	0	0	1	0	0	0	0	0	217	128
FQ312003_intergenic_3706051_3706139	FQ312003_intergenic_3706051_3706139	FQ312003_intergenic_3706051_3706139	2	0	0	0	0	0	0	0	0	12	8
FQ312003_intergenic_3709904_3710001	FQ312003_intergenic_3709904_3710001	FQ312003_intergenic_3709904_3710001	3	1	0	0	1	0	1	0	4	226	155
FQ312003_intergenic_3714975_3715211	FQ312003_intergenic_3714975_3715211	FQ312003_intergenic_3714975_3715211	2	4	0	0	0	0	2	1	2	12	8
FQ312003_intergenic_3720107_3720183	FQ312003_intergenic_3720107_3720183	FQ312003_intergenic_3720107_3720183	1	0	0	0	0	0	2	2	0	322	178
FQ312003_intergenic_372170_372200	FQ312003_intergenic_372170_372200	FQ312003_intergenic_372170_372200	0	0	0	0	1	0	0	0	0	7	7
FQ312003_intergenic_3729654_3729899	FQ312003_intergenic_3729654_3729899	FQ312003_intergenic_3729654_3729899	3	0	0	2	0	3	0	0	4	216	228
FQ312003_intergenic_3731107_3731429	FQ312003_intergenic_3731107_3731429	FQ312003_intergenic_3731107_3731429	2	3	0	1	0	0	0	0	3	586	503
FQ312003_intergenic_3733401_3733438	FQ312003_intergenic_3733401_3733438	FQ312003_intergenic_3733401_3733438	2	0	0	0	1	0	2	1	2	14	11
FQ312003_intergenic_3734535_3734563	FQ312003_intergenic_3734535_3734563	FQ312003_intergenic_3734535_3734563	1	0	0	0	0	0	1	0	0	24	29
FQ312003_intergenic_373516_373623	FQ312003_intergenic_373516_373623	FQ312003_intergenic_373516_373623	4	2	0	1	0	0	4	0	0	53	41
FQ312003_intergenic_3735360_3735382	FQ312003_intergenic_3735360_3735382	FQ312003_intergenic_3735360_3735382	1	2	0	0	0	0	2	0	0	5	8
FQ312003_intergenic_3736521_3736888	FQ312003_intergenic_3736521_3736888	FQ312003_intergenic_3736521_3736888	9	0	0	0	0	0	0	0	3	60	52
FQ312003_intergenic_3737478_3737908	FQ312003_intergenic_3737478_3737908	FQ312003_intergenic_3737478_3737908	9	7	0	0	1	4	2	0	2	177	78
FQ312003_intergenic_3743577_3743601	FQ312003_intergenic_3743577_3743601	FQ312003_intergenic_3743577_3743601	1	0	0	0	0	0	0	0	0	20	24
FQ312003_intergenic_3749050_3749207	FQ312003_intergenic_3749050_3749207	FQ312003_intergenic_3749050_3749207	6	1	0	0	0	2	2	0	0	222	199
FQ312003_intergenic_3749901_3749925	FQ312003_intergenic_3749901_3749925	FQ312003_intergenic_3749901_3749925	2	0	0	0	0	0	0	0	0	4	0
FQ312003_intergenic_3754875_3755195	FQ312003_intergenic_3754875_3755195	FQ312003_intergenic_3754875_3755195	5	0	0	1	0	0	2	1	1	321	113
FQ312003_intergenic_3755680_3755773	FQ312003_intergenic_3755680_3755773	FQ312003_intergenic_3755680_3755773	2	1	0	0	1	0	1	1	2	18	36
FQ312003_intergenic_3756978_3757198	FQ312003_intergenic_3756978_3757198	FQ312003_intergenic_3756978_3757198	7	2	0	0	0	1	1	0	4	33	57
FQ312003_intergenic_3758154_3758298	FQ312003_intergenic_3758154_3758298	FQ312003_intergenic_3758154_3758298	5	6	0	4	2	2	1	8	25	2193	2665
FQ312003_intergenic_3761594_3761618	FQ312003_intergenic_3761594_3761618	FQ312003_intergenic_3761594_3761618	1	0	0	0	0	0	0	0	0	23	18
FQ312003_intergenic_3762839_3763008	FQ312003_intergenic_3762839_3763008	FQ312003_intergenic_3762839_3763008	2	0	0	0	0	0	4	0	3	95	74
FQ312003_intergenic_3766015_3766113	FQ312003_intergenic_3766015_3766113	FQ312003_intergenic_3766015_3766113	0	0	0	0	0	0	0	0	0	33	42
FQ312003_intergenic_3768127_3768195	FQ312003_intergenic_3768127_3768195	FQ312003_intergenic_3768127_3768195	1	0	0	0	0	0	1	0	0	27	58
FQ312003_intergenic_3770813_3770843	FQ312003_intergenic_3770813_3770843	FQ312003_intergenic_3770813_3770843	0	0	0	0	1	0	0	0	0	65	55
FQ312003_intergenic_377374_377963	FQ312003_intergenic_377374_377963	FQ312003_intergenic_377374_377963	5	3	0	0	0	0	2	0	5	213	113
FQ312003_intergenic_3778136_3778340	FQ312003_intergenic_3778136_3778340	FQ312003_intergenic_3778136_3778340	6	0	0	0	0	2	0	2	8	665	944
FQ312003_intergenic_3779638_3779890	FQ312003_intergenic_3779638_3779890	FQ312003_intergenic_3779638_3779890	1	2	0	2	0	2	0	0	1	342	307
FQ312003_intergenic_3781365_3781403	FQ312003_intergenic_3781365_3781403	FQ312003_intergenic_3781365_3781403	1	2	2	2	0	0	1	4	5	231	256
FQ312003_intergenic_3781840_3782126	FQ312003_intergenic_3781840_3782126	FQ312003_intergenic_3781840_3782126	4	7	0	11	3	4	1	4	20	13494	10023
FQ312003_intergenic_3782662_3782885	FQ312003_intergenic_3782662_3782885	FQ312003_intergenic_3782662_3782885	3	1	0	0	3	4	0	2	3	912	900
FQ312003_intergenic_3787358_3787438	FQ312003_intergenic_3787358_3787438	FQ312003_intergenic_3787358_3787438	0	0	2	2	1	2	0	10	11	14	24
FQ312003_intergenic_3788811_3788920	FQ312003_intergenic_3788811_3788920	FQ312003_intergenic_3788811_3788920	1	2	0	1	1	1	0	0	1	26	43
FQ312003_intergenic_3795729_3795803	FQ312003_intergenic_3795729_3795803	FQ312003_intergenic_3795729_3795803	1	0	0	0	0	0	1	0	0	5	6
FQ312003_intergenic_3796624_3796848	FQ312003_intergenic_3796624_3796848	FQ312003_intergenic_3796624_3796848	0	1	0	0	0	1	0	1	7	725	480
FQ312003_intergenic_3800201_3800380	FQ312003_intergenic_3800201_3800380	FQ312003_intergenic_3800201_3800380	3	2	0	0	0	0	1	0	1	48	24
FQ312003_intergenic_3801446_3801975	FQ312003_intergenic_3801446_3801975	FQ312003_intergenic_3801446_3801975	4	2	0	0	1	0	4	2	3	250	198
FQ312003_intergenic_3804077_3804326	FQ312003_intergenic_3804077_3804326	FQ312003_intergenic_3804077_3804326	5	0	0	2	0	0	2	0	0	88	60
FQ312003_intergenic_3808727_3808854	FQ312003_intergenic_3808727_3808854	FQ312003_intergenic_3808727_3808854	0	0	0	0	0	0	0	0	2	76	78
FQ312003_intergenic_3811426_3811544	FQ312003_intergenic_3811426_3811544	FQ312003_intergenic_3811426_3811544	2	0	0	0	0	1	1	0	1	352	260
FQ312003_intergenic_3812932_3812988	FQ312003_intergenic_3812932_3812988	FQ312003_intergenic_3812932_3812988	1	0	0	0	0	0	0	0	2	174	110
FQ312003_intergenic_3815009_3815168	FQ312003_intergenic_3815009_3815168	FQ312003_intergenic_3815009_3815168	3	0	1	0	0	1	0	1	1	149	117
FQ312003_intergenic_3825795_3825938	FQ312003_intergenic_3825795_3825938	FQ312003_intergenic_3825795_3825938	2	1	0	6	0	1	0	0	1	2396	1576
FQ312003_intergenic_3829475_3829837	FQ312003_intergenic_3829475_3829837	FQ312003_intergenic_3829475_3829837	3	2	0	2	2	0	1	8	4	273	426
FQ312003_intergenic_3830189_3830205	FQ312003_intergenic_3830189_3830205	FQ312003_intergenic_3830189_3830205	2	0	0	0	0	0	0	0	0	83	46
FQ312003_intergenic_3835641_3835696	FQ312003_intergenic_3835641_3835696	FQ312003_intergenic_3835641_3835696	0	0	0	0	0	0	0	0	0	40	57
FQ312003_intergenic_3837354_3837859	FQ312003_intergenic_3837354_3837859	FQ312003_intergenic_3837354_3837859	11	6	0	0	0	0	3	2	8	1955	992
FQ312003_intergenic_3840468_3840516	FQ312003_intergenic_3840468_3840516	FQ312003_intergenic_3840468_3840516	1	1	0	0	0	0	0	0	1	3	0
FQ312003_intergenic_3841625_3841850	FQ312003_intergenic_3841625_3841850	FQ312003_intergenic_3841625_3841850	3	2	0	1	0	0	5	0	0	25	22
FQ312003_intergenic_3843643_3843759	FQ312003_intergenic_3843643_3843759	FQ312003_intergenic_3843643_3843759	4	0	0	0	0	0	1	0	2	70	39
FQ312003_intergenic_384474_385006	FQ312003_intergenic_384474_385006	FQ312003_intergenic_384474_385006	2	1	2	2	0	0	0	0	1	139	21
FQ312003_intergenic_3849351_3849755	FQ312003_intergenic_3849351_3849755	FQ312003_intergenic_3849351_3849755	3	2	0	0	0	0	3	4	4	295	255
FQ312003_intergenic_3850561_3850616	FQ312003_intergenic_3850561_3850616	FQ312003_intergenic_3850561_3850616	0	0	0	0	3	0	0	0	1	551	649
FQ312003_intergenic_3854019_3854103	FQ312003_intergenic_3854019_3854103	FQ312003_intergenic_3854019_3854103	3	2	1	0	0	0	0	2	3	149	94
FQ312003_intergenic_3854834_3854951	FQ312003_intergenic_3854834_3854951	FQ312003_intergenic_3854834_3854951	4	0	0	0	0	0	3	0	1	11	16
FQ312003_intergenic_3856787_3857124	FQ312003_intergenic_3856787_3857124	FQ312003_intergenic_3856787_3857124	9	0	0	0	0	0	2	0	0	81	63
FQ312003_intergenic_3857516_3857715	FQ312003_intergenic_3857516_3857715	FQ312003_intergenic_3857516_3857715	4	5	16	34	12	47	2	21	119	14792	6014
FQ312003_intergenic_3858017_3858212	FQ312003_intergenic_3858017_3858212	FQ312003_intergenic_3858017_3858212	3	1	0	0	0	1	4	0	3	41	157
FQ312003_intergenic_3858730_3859000	FQ312003_intergenic_3858730_3859000	FQ312003_intergenic_3858730_3859000	0	2	2	0	0	2	2	0	6	681	869
FQ312003_intergenic_3859862_3859938	FQ312003_intergenic_3859862_3859938	FQ312003_intergenic_3859862_3859938	0	0	0	0	1	0	0	0	5	12	23
FQ312003_intergenic_3860507_3861034	FQ312003_intergenic_3860507_3861034	FQ312003_intergenic_3860507_3861034	2	0	0	0	0	2	2	2	2	242	229
FQ312003_intergenic_386345_386543	FQ312003_intergenic_386345_386543	FQ312003_intergenic_386345_386543	2	0	0	0	0	0	0	2	0	50	33
FQ312003_intergenic_3864126_3864163	FQ312003_intergenic_3864126_3864163	FQ312003_intergenic_3864126_3864163	4	0	0	1	0	0	1	0	0	407	656
FQ312003_intergenic_3864567_3864631	FQ312003_intergenic_3864567_3864631	FQ312003_intergenic_3864567_3864631	0	3	0	0	0	0	0	0	3	315	308
FQ312003_intergenic_3866104_3866177	FQ312003_intergenic_3866104_3866177	FQ312003_intergenic_3866104_3866177	0	0	0	0	1	0	0	0	0	11	12
FQ312003_intergenic_3869155_3869416	FQ312003_intergenic_3869155_3869416	FQ312003_intergenic_3869155_3869416	6	0	0	0	0	0	0	0	2	114	91
FQ312003_intergenic_3871581_3871795	FQ312003_intergenic_3871581_3871795	FQ312003_intergenic_3871581_3871795	6	2	0	0	0	1	0	0	4	401	231
FQ312003_intergenic_3873924_3873996	FQ312003_intergenic_3873924_3873996	FQ312003_intergenic_3873924_3873996	3	1	0	0	0	0	1	0	1	25	27
FQ312003_intergenic_3875858_3875873	FQ312003_intergenic_3875858_3875873	FQ312003_intergenic_3875858_3875873	0	0	0	0	0	0	0	0	2	30	53
FQ312003_intergenic_3876775_3876903	FQ312003_intergenic_3876775_3876903	FQ312003_intergenic_3876775_3876903	1	1	0	0	0	0	0	1	1	4	5
FQ312003_intergenic_3879435_3879472	FQ312003_intergenic_3879435_3879472	FQ312003_intergenic_3879435_3879472	1	0	0	0	0	0	0	0	0	17	11
FQ312003_intergenic_3886026_3886085	FQ312003_intergenic_3886026_3886085	FQ312003_intergenic_3886026_3886085	1	0	0	0	0	1	0	0	0	0	5
FQ312003_intergenic_3887002_3887164	FQ312003_intergenic_3887002_3887164	FQ312003_intergenic_3887002_3887164	1	2	0	0	0	0	1	0	3	94	43
FQ312003_intergenic_3889221_3889237	FQ312003_intergenic_3889221_3889237	FQ312003_intergenic_3889221_3889237	0	0	0	0	0	1	0	0	3	5	8
FQ312003_intergenic_3890877_3890944	FQ312003_intergenic_3890877_3890944	FQ312003_intergenic_3890877_3890944	2	0	0	0	0	0	0	0	0	68	45
FQ312003_intergenic_3891927_3892110	FQ312003_intergenic_3891927_3892110	FQ312003_intergenic_3891927_3892110	0	0	0	0	1	0	0	0	0	9	4
FQ312003_intergenic_389523_389823	FQ312003_intergenic_389523_389823	FQ312003_intergenic_389523_389823	4	0	0	0	2	0	2	2	0	85	209
FQ312003_intergenic_3896157_3896531	FQ312003_intergenic_3896157_3896531	FQ312003_intergenic_3896157_3896531	3	2	0	0	0	4	4	4	13	573	245
FQ312003_intergenic_3898549_3898668	FQ312003_intergenic_3898549_3898668	FQ312003_intergenic_3898549_3898668	1	0	0	1	0	0	0	0	1	10	4
FQ312003_intergenic_3900724_3900913	FQ312003_intergenic_3900724_3900913	FQ312003_intergenic_3900724_3900913	3	0	0	0	0	0	0	0	0	411	324
FQ312003_intergenic_3901377_3901765	FQ312003_intergenic_3901377_3901765	FQ312003_intergenic_3901377_3901765	8	2	0	2	1	0	2	0	2	631	298
FQ312003_intergenic_390449_390491	FQ312003_intergenic_390449_390491	FQ312003_intergenic_390449_390491	0	1	0	0	0	0	0	0	0	10	12
FQ312003_intergenic_3906979_3907176	FQ312003_intergenic_3906979_3907176	FQ312003_intergenic_3906979_3907176	1	0	0	0	0	0	1	2	2	173	103
FQ312003_intergenic_3912502_3912719	FQ312003_intergenic_3912502_3912719	FQ312003_intergenic_3912502_3912719	1	0	0	0	0	0	0	0	0	11	7
FQ312003_intergenic_3918681_3918827	FQ312003_intergenic_3918681_3918827	FQ312003_intergenic_3918681_3918827	2	3	0	0	0	0	0	0	0	158	112
FQ312003_intergenic_3923753_3923937	FQ312003_intergenic_3923753_3923937	FQ312003_intergenic_3923753_3923937	4	1	0	2	0	0	1	1	4	8	12
FQ312003_intergenic_3926478_3926579	FQ312003_intergenic_3926478_3926579	FQ312003_intergenic_3926478_3926579	1	0	0	0	0	0	0	0	0	98	85
FQ312003_intergenic_3931789_3932070	FQ312003_intergenic_3931789_3932070	FQ312003_intergenic_3931789_3932070	4	1	0	0	0	0	0	0	4	321	193
FQ312003_intergenic_3932981_3933029	FQ312003_intergenic_3932981_3933029	FQ312003_intergenic_3932981_3933029	0	1	0	1	1	1	0	0	2	18	16
FQ312003_intergenic_3933685_3933750	FQ312003_intergenic_3933685_3933750	FQ312003_intergenic_3933685_3933750	0	0	0	1	0	0	0	0	1	32	20
FQ312003_intergenic_3940258_3940667	FQ312003_intergenic_3940258_3940667	FQ312003_intergenic_3940258_3940667	15	1	0	3	0	4	2	0	19	2118	1677
FQ312003_intergenic_3943827_3943943	FQ312003_intergenic_3943827_3943943	FQ312003_intergenic_3943827_3943943	0	0	0	9	0	5	0	6	21	855	644
FQ312003_intergenic_3944710_3944781	FQ312003_intergenic_3944710_3944781	FQ312003_intergenic_3944710_3944781	0	0	0	0	0	0	0	0	1	7	7
FQ312003_intergenic_3948760_3948784	FQ312003_intergenic_3948760_3948784	FQ312003_intergenic_3948760_3948784	0	0	0	0	0	0	0	0	0	36	30
FQ312003_intergenic_3950656_3950673	FQ312003_intergenic_3950656_3950673	FQ312003_intergenic_3950656_3950673	0	0	0	0	0	0	0	0	1	12	5
FQ312003_intergenic_3951656_3951805	FQ312003_intergenic_3951656_3951805	FQ312003_intergenic_3951656_3951805	1	0	0	0	0	0	0	0	0	98	48
FQ312003_intergenic_3954206_3954361	FQ312003_intergenic_3954206_3954361	FQ312003_intergenic_3954206_3954361	4	0	0	2	0	1	2	0	1	75	37
FQ312003_intergenic_39585_40080	FQ312003_intergenic_39585_40080	FQ312003_intergenic_39585_40080	7	0	0	0	0	0	3	0	2	89	45
FQ312003_intergenic_3962389_3962515	FQ312003_intergenic_3962389_3962515	FQ312003_intergenic_3962389_3962515	4	0	0	0	2	0	0	0	2	87	59
FQ312003_intergenic_3964008_3964027	FQ312003_intergenic_3964008_3964027	FQ312003_intergenic_3964008_3964027	1	1	0	0	0	0	2	0	0	5	3
FQ312003_intergenic_3969653_3970250	FQ312003_intergenic_3969653_3970250	FQ312003_intergenic_3969653_3970250	6	7	2	2	1	2	0	3	13	5140	1892
FQ312003_intergenic_3970720_3971272	FQ312003_intergenic_3970720_3971272	FQ312003_intergenic_3970720_3971272	6	1	0	2	0	0	0	2	4	556	431
FQ312003_intergenic_3972911_3972996	FQ312003_intergenic_3972911_3972996	FQ312003_intergenic_3972911_3972996	0	0	2	0	0	0	4	0	1	76	90
FQ312003_intergenic_3974135_3975332	FQ312003_intergenic_3974135_3975332	FQ312003_intergenic_3974135_3975332	10	0	0	0	2	0	1	0	8	812	391
FQ312003_intergenic_397604_397995	FQ312003_intergenic_397604_397995	FQ312003_intergenic_397604_397995	12	3	0	0	1	0	0	0	2	3	8
FQ312003_intergenic_3980351_3981102	FQ312003_intergenic_3980351_3981102	FQ312003_intergenic_3980351_3981102	13	3	0	0	0	0	4	0	3	1159	573
FQ312003_intergenic_3981884_3982011	FQ312003_intergenic_3981884_3982011	FQ312003_intergenic_3981884_3982011	4	0	0	0	0	0	0	0	1	47	86
FQ312003_intergenic_3982592_3982805	FQ312003_intergenic_3982592_3982805	FQ312003_intergenic_3982592_3982805	3	0	1	0	0	2	0	0	1	106	45
FQ312003_intergenic_3985633_3985751	FQ312003_intergenic_3985633_3985751	FQ312003_intergenic_3985633_3985751	0	0	1	2	1	0	1	0	3	20	8
FQ312003_intergenic_3986548_3986955	FQ312003_intergenic_3986548_3986955	FQ312003_intergenic_3986548_3986955	2	8	10	12	0	36	5	19	45	639	395
FQ312003_intergenic_3988943_3989077	FQ312003_intergenic_3988943_3989077	FQ312003_intergenic_3988943_3989077	0	1	0	0	1	0	0	0	0	68	22
FQ312003_intergenic_3992628_3992672	FQ312003_intergenic_3992628_3992672	FQ312003_intergenic_3992628_3992672	1	0	0	0	0	0	3	0	1	20	10
FQ312003_intergenic_3993695_3993812	FQ312003_intergenic_3993695_3993812	FQ312003_intergenic_3993695_3993812	1	0	0	0	0	0	2	0	0	2	8
FQ312003_intergenic_3996712_3996807	FQ312003_intergenic_3996712_3996807	FQ312003_intergenic_3996712_3996807	0	1	0	0	0	0	0	2	0	33	30
FQ312003_intergenic_3999942_4000056	FQ312003_intergenic_3999942_4000056	FQ312003_intergenic_3999942_4000056	4	0	0	0	0	2	0	0	0	85	66
FQ312003_intergenic_4006546_4006797	FQ312003_intergenic_4006546_4006797	FQ312003_intergenic_4006546_4006797	1	0	0	0	4	2	4	2	2	195	219
FQ312003_intergenic_4007351_4007441	FQ312003_intergenic_4007351_4007441	FQ312003_intergenic_4007351_4007441	0	0	0	0	1	0	0	0	0	1	5
FQ312003_intergenic_4008934_4008975	FQ312003_intergenic_4008934_4008975	FQ312003_intergenic_4008934_4008975	1	1	0	0	0	0	0	0	0	1	2
FQ312003_intergenic_401133_401324	FQ312003_intergenic_401133_401324	FQ312003_intergenic_401133_401324	11	0	0	0	0	3	0	0	3	255	228
FQ312003_intergenic_4015874_4016097	FQ312003_intergenic_4015874_4016097	FQ312003_intergenic_4015874_4016097	0	1	0	0	0	0	1	0	0	69	31
FQ312003_intergenic_4019173_4019960	FQ312003_intergenic_4019173_4019960	FQ312003_intergenic_4019173_4019960	7	6	0	3	4	4	4	1	6	281	268
FQ312003_intergenic_4020850_4020951	FQ312003_intergenic_4020850_4020951	FQ312003_intergenic_4020850_4020951	4	1	0	0	0	1	0	0	0	190	62
FQ312003_intergenic_4024236_4024360	FQ312003_intergenic_4024236_4024360	FQ312003_intergenic_4024236_4024360	2	2	0	0	0	0	1	2	0	22	18
FQ312003_intergenic_402679_402766	FQ312003_intergenic_402679_402766	FQ312003_intergenic_402679_402766	0	0	0	2	0	0	2	1	2	31	47
FQ312003_intergenic_4028447_4028789	FQ312003_intergenic_4028447_4028789	FQ312003_intergenic_4028447_4028789	5	0	0	0	8	6	0	4	5	653	423
FQ312003_intergenic_4030552_4030640	FQ312003_intergenic_4030552_4030640	FQ312003_intergenic_4030552_4030640	1	0	0	0	0	0	3	0	0	20	33
FQ312003_intergenic_4031699_4031898	FQ312003_intergenic_4031699_4031898	FQ312003_intergenic_4031699_4031898	3	0	0	4	4	1	0	0	6	2109	3099
FQ312003_intergenic_4033563_4033583	FQ312003_intergenic_4033563_4033583	FQ312003_intergenic_4033563_4033583	2	1	0	0	0	0	0	0	0	7	7
FQ312003_intergenic_4041360_4041448	FQ312003_intergenic_4041360_4041448	FQ312003_intergenic_4041360_4041448	0	0	0	0	0	0	0	0	1	58	60
FQ312003_intergenic_4045901_4045929	FQ312003_intergenic_4045901_4045929	FQ312003_intergenic_4045901_4045929	0	0	0	0	0	2	0	0	0	25	28
FQ312003_intergenic_4055309_4055468	FQ312003_intergenic_4055309_4055468	FQ312003_intergenic_4055309_4055468	0	0	0	0	0	0	0	0	0	9	5
FQ312003_intergenic_4056415_4056619	FQ312003_intergenic_4056415_4056619	FQ312003_intergenic_4056415_4056619	1	0	0	0	0	0	0	0	1	90	46
FQ312003_intergenic_4059190_4059203	FQ312003_intergenic_4059190_4059203	FQ312003_intergenic_4059190_4059203	0	0	0	0	0	0	1	0	0	12	29
FQ312003_intergenic_4063736_4063782	FQ312003_intergenic_4063736_4063782	FQ312003_intergenic_4063736_4063782	0	0	0	2	2	0	6	3	0	31	79
FQ312003_intergenic_4066389_4066948	FQ312003_intergenic_4066389_4066948	FQ312003_intergenic_4066389_4066948	0	5	0	7	3	6	1	10	17	2421	1898
FQ312003_intergenic_4069436_4069464	FQ312003_intergenic_4069436_4069464	FQ312003_intergenic_4069436_4069464	5	1	0	0	0	0	1	0	0	1	1
FQ312003_intergenic_4070942_4071096	FQ312003_intergenic_4070942_4071096	FQ312003_intergenic_4070942_4071096	6	1	0	3	0	0	0	2	0	118	86
FQ312003_intergenic_4072415_4072638	FQ312003_intergenic_4072415_4072638	FQ312003_intergenic_4072415_4072638	0	0	0	0	0	0	0	0	3	120	44
FQ312003_intergenic_4074637_4075337	FQ312003_intergenic_4074637_4075337	FQ312003_intergenic_4074637_4075337	6	4	0	0	2	4	4	3	4	243	239
FQ312003_intergenic_4077554_4077610	FQ312003_intergenic_4077554_4077610	FQ312003_intergenic_4077554_4077610	0	0	0	0	0	0	0	0	1	62	67
FQ312003_intergenic_407808_407983	FQ312003_intergenic_407808_407983	FQ312003_intergenic_407808_407983	7	0	0	0	0	0	0	0	2	206	118
FQ312003_intergenic_4080433_4080500	FQ312003_intergenic_4080433_4080500	FQ312003_intergenic_4080433_4080500	1	0	0	2	0	0	0	2	3	47	51
FQ312003_intergenic_408186_408201	FQ312003_intergenic_408186_408201	FQ312003_intergenic_408186_408201	1	0	0	1	0	0	0	1	0	290	378
FQ312003_intergenic_4084811_4084845	FQ312003_intergenic_4084811_4084845	FQ312003_intergenic_4084811_4084845	0	0	0	0	0	2	0	1	2	11	31
FQ312003_intergenic_4085987_4086052	FQ312003_intergenic_4085987_4086052	FQ312003_intergenic_4085987_4086052	0	0	0	0	0	0	1	2	0	200	92
FQ312003_intergenic_4090246_4090295	FQ312003_intergenic_4090246_4090295	FQ312003_intergenic_4090246_4090295	3	0	0	0	0	0	0	0	0	1	6
FQ312003_intergenic_4092226_4092313	FQ312003_intergenic_4092226_4092313	FQ312003_intergenic_4092226_4092313	0	0	0	0	0	0	0	0	3	303	853
FQ312003_intergenic_4093785_4094003	FQ312003_intergenic_4093785_4094003	FQ312003_intergenic_4093785_4094003	0	3	0	0	0	0	0	0	0	239	111
FQ312003_intergenic_4094803_4094931	FQ312003_intergenic_4094803_4094931	FQ312003_intergenic_4094803_4094931	4	0	0	4	0	0	0	0	0	13	5
FQ312003_intergenic_4101918_4102432	FQ312003_intergenic_4101918_4102432	FQ312003_intergenic_4101918_4102432	10	0	0	0	3	0	1	4	4	1434	996
FQ312003_intergenic_4105149_4105426	FQ312003_intergenic_4105149_4105426	FQ312003_intergenic_4105149_4105426	2	4	0	0	0	2	2	0	2	218	379
FQ312003_intergenic_4106519_4106568	FQ312003_intergenic_4106519_4106568	FQ312003_intergenic_4106519_4106568	0	0	0	0	1	0	0	0	0	7	6
FQ312003_intergenic_4110608_4110854	FQ312003_intergenic_4110608_4110854	FQ312003_intergenic_4110608_4110854	4	4	0	0	0	0	0	4	0	945	594
FQ312003_intergenic_4112824_4112919	FQ312003_intergenic_4112824_4112919	FQ312003_intergenic_4112824_4112919	1	0	0	0	0	3	0	0	0	2	17
FQ312003_intergenic_4116839_4116871	FQ312003_intergenic_4116839_4116871	FQ312003_intergenic_4116839_4116871	0	3	0	3	0	3	0	2	11	425	321
FQ312003_intergenic_412054_412098	FQ312003_intergenic_412054_412098	FQ312003_intergenic_412054_412098	2	0	0	2	1	0	0	0	0	7	7
FQ312003_intergenic_4121009_4127039	FQ312003_intergenic_4121009_4127039	FQ312003_intergenic_4121009_4127039	16354	14962	93832	274248	110907	207130	2689	233884	594377	2049904	1954043
FQ312003_intergenic_4129979_4130467	FQ312003_intergenic_4129979_4130467	FQ312003_intergenic_4129979_4130467	6	0	0	2	2	4	2	12	8	198	134
FQ312003_intergenic_4133422_4133481	FQ312003_intergenic_4133422_4133481	FQ312003_intergenic_4133422_4133481	0	0	0	1	0	0	3	0	1	14	26
FQ312003_intergenic_4136980_4137162	FQ312003_intergenic_4136980_4137162	FQ312003_intergenic_4136980_4137162	0	2	0	2	0	1	0	0	1	111	117
FQ312003_intergenic_4138809_4138871	FQ312003_intergenic_4138809_4138871	FQ312003_intergenic_4138809_4138871	1	0	0	0	0	0	0	0	0	8	9
FQ312003_intergenic_4144904_4144921	FQ312003_intergenic_4144904_4144921	FQ312003_intergenic_4144904_4144921	1	0	0	1	0	0	1	0	0	48	172
FQ312003_intergenic_4146288_4146330	FQ312003_intergenic_4146288_4146330	FQ312003_intergenic_4146288_4146330	1	2	0	2	2	0	0	2	9	2487	2235
FQ312003_intergenic_4146761_4147078	FQ312003_intergenic_4146761_4147078	FQ312003_intergenic_4146761_4147078	7	0	0	28	12	18	6	15	47	14673	9146
FQ312003_intergenic_4148439_4148567	FQ312003_intergenic_4148439_4148567	FQ312003_intergenic_4148439_4148567	1	1	0	0	1	0	1	0	1	72	101
FQ312003_intergenic_414981_415111	FQ312003_intergenic_414981_415111	FQ312003_intergenic_414981_415111	1	2	0	1	1	2	0	2	8	799	586
FQ312003_intergenic_415488_415522	FQ312003_intergenic_415488_415522	FQ312003_intergenic_415488_415522	1	0	0	1	0	0	0	0	0	5	2
FQ312003_intergenic_4160809_4160914	FQ312003_intergenic_4160809_4160914	FQ312003_intergenic_4160809_4160914	4	0	0	0	0	0	0	0	1	139	109
FQ312003_intergenic_4162401_4163416	FQ312003_intergenic_4162401_4163416	FQ312003_intergenic_4162401_4163416	22	0	3	26	10	12	250	47	120	4211	3396
FQ312003_intergenic_4167601_4167861	FQ312003_intergenic_4167601_4167861	FQ312003_intergenic_4167601_4167861	3	0	3	2	2	4	4	0	13	4167	3679
FQ312003_intergenic_4170970_4171054	FQ312003_intergenic_4170970_4171054	FQ312003_intergenic_4170970_4171054	0	0	0	0	0	0	2	1	0	108	41
FQ312003_intergenic_417249_417412	FQ312003_intergenic_417249_417412	FQ312003_intergenic_417249_417412	3	0	0	0	0	0	2	0	0	220	72
FQ312003_intergenic_4173432_4173516	FQ312003_intergenic_4173432_4173516	FQ312003_intergenic_4173432_4173516	0	0	2	1	0	1	0	2	5	747	428
FQ312003_intergenic_4177001_4177035	FQ312003_intergenic_4177001_4177035	FQ312003_intergenic_4177001_4177035	2	0	0	0	0	0	0	0	0	19	26
FQ312003_intergenic_4179299_4179669	FQ312003_intergenic_4179299_4179669	FQ312003_intergenic_4179299_4179669	7	0	0	0	0	0	2	0	3	636	379
FQ312003_intergenic_4183072_4183240	FQ312003_intergenic_4183072_4183240	FQ312003_intergenic_4183072_4183240	5	4	0	4	1	0	4	0	0	454	596
FQ312003_intergenic_418401_418422	FQ312003_intergenic_418401_418422	FQ312003_intergenic_418401_418422	1	2	0	0	0	0	2	0	0	37	35
FQ312003_intergenic_4191109_4191256	FQ312003_intergenic_4191109_4191256	FQ312003_intergenic_4191109_4191256	1	0	0	0	1	0	0	0	0	11	5
FQ312003_intergenic_4193622_4193864	FQ312003_intergenic_4193622_4193864	FQ312003_intergenic_4193622_4193864	5	3	0	0	0	0	0	3	0	53	53
FQ312003_intergenic_4196201_4196358	FQ312003_intergenic_4196201_4196358	FQ312003_intergenic_4196201_4196358	0	0	0	0	0	0	0	1	1	360	295
FQ312003_intergenic_4197221_4197259	FQ312003_intergenic_4197221_4197259	FQ312003_intergenic_4197221_4197259	1	0	0	0	0	0	0	1	2	6	5
FQ312003_intergenic_4201894_4201998	FQ312003_intergenic_4201894_4201998	FQ312003_intergenic_4201894_4201998	1	3	4	0	0	4	0	0	8	421	467
FQ312003_intergenic_4205008_4205092	FQ312003_intergenic_4205008_4205092	FQ312003_intergenic_4205008_4205092	2	0	0	0	0	2	0	0	1	394	365
FQ312003_intergenic_4207459_4207611	FQ312003_intergenic_4207459_4207611	FQ312003_intergenic_4207459_4207611	2	0	0	0	2	0	1	0	0	31	16
FQ312003_intergenic_4209536_4209631	FQ312003_intergenic_4209536_4209631	FQ312003_intergenic_4209536_4209631	2	3	0	0	0	0	0	0	1	14	7
FQ312003_intergenic_4213095_4213183	FQ312003_intergenic_4213095_4213183	FQ312003_intergenic_4213095_4213183	2	3	0	0	0	0	0	0	0	16	7
FQ312003_intergenic_4217277_4223071	FQ312003_intergenic_4217277_4223071	FQ312003_intergenic_4217277_4223071	16656	15472	94989	275059	110107	207097	2668	231860	587210	2033205	1919732
FQ312003_intergenic_4227232_4227518	FQ312003_intergenic_4227232_4227518	FQ312003_intergenic_4227232_4227518	2	2	0	0	1	0	1	1	1	259	196
FQ312003_intergenic_4230406_4230639	FQ312003_intergenic_4230406_4230639	FQ312003_intergenic_4230406_4230639	5	4	2	2	0	2	0	0	6	183	331
FQ312003_intergenic_4231340_4231854	FQ312003_intergenic_4231340_4231854	FQ312003_intergenic_4231340_4231854	7	14	26	72	51	46	2	101	347	12302	5743
FQ312003_intergenic_4232471_4232558	FQ312003_intergenic_4232471_4232558	FQ312003_intergenic_4232471_4232558	6	1	0	0	0	0	0	2	2	68	97
FQ312003_intergenic_4234033_4234244	FQ312003_intergenic_4234033_4234244	FQ312003_intergenic_4234033_4234244	3	0	0	1	1	0	0	1	5	136	236
FQ312003_intergenic_4236813_4236986	FQ312003_intergenic_4236813_4236986	FQ312003_intergenic_4236813_4236986	5	4	2	0	3	0	1	4	9	84	136
FQ312003_intergenic_4238497_4238771	FQ312003_intergenic_4238497_4238771	FQ312003_intergenic_4238497_4238771	0	0	0	0	1	5	0	0	7	228	185
FQ312003_intergenic_424189_424600	FQ312003_intergenic_424189_424600	FQ312003_intergenic_424189_424600	3	0	0	0	2	0	4	0	0	86	42
FQ312003_intergenic_4246342_4246397	FQ312003_intergenic_4246342_4246397	FQ312003_intergenic_4246342_4246397	1	1	0	0	0	0	6	0	0	32	14
FQ312003_intergenic_4256149_4256206	FQ312003_intergenic_4256149_4256206	FQ312003_intergenic_4256149_4256206	2	0	0	0	0	0	0	0	0	16	6
FQ312003_intergenic_4258047_4258136	FQ312003_intergenic_4258047_4258136	FQ312003_intergenic_4258047_4258136	5	0	0	4	0	0	0	0	0	76	79
FQ312003_intergenic_4262907_4263023	FQ312003_intergenic_4262907_4263023	FQ312003_intergenic_4262907_4263023	5	1	0	0	0	0	6	0	3	15	11
FQ312003_intergenic_4269297_4269390	FQ312003_intergenic_4269297_4269390	FQ312003_intergenic_4269297_4269390	3	0	0	0	0	1	0	4	2	688	554
FQ312003_intergenic_4270328_4270494	FQ312003_intergenic_4270328_4270494	FQ312003_intergenic_4270328_4270494	4	0	0	2	1	0	1	0	3	80	98
FQ312003_intergenic_4271627_4271750	FQ312003_intergenic_4271627_4271750	FQ312003_intergenic_4271627_4271750	2	2	0	1	0	0	0	0	0	118	59
FQ312003_intergenic_4272910_4273163	FQ312003_intergenic_4272910_4273163	FQ312003_intergenic_4272910_4273163	0	2	2	0	0	0	2	0	2	38	26
FQ312003_intergenic_4276444_4276469	FQ312003_intergenic_4276444_4276469	FQ312003_intergenic_4276444_4276469	1	0	0	2	0	1	0	0	1	90	88
FQ312003_intergenic_4277398_4277439	FQ312003_intergenic_4277398_4277439	FQ312003_intergenic_4277398_4277439	1	0	0	0	0	0	0	0	0	1	0
FQ312003_intergenic_4280266_4280452	FQ312003_intergenic_4280266_4280452	FQ312003_intergenic_4280266_4280452	0	2	0	0	0	0	6	0	1	35	13
FQ312003_intergenic_4281390_4281441	FQ312003_intergenic_4281390_4281441	FQ312003_intergenic_4281390_4281441	4	1	0	1	0	0	0	0	1	25	15
FQ312003_intergenic_4283422_4283939	FQ312003_intergenic_4283422_4283939	FQ312003_intergenic_4283422_4283939	2	2	0	0	0	0	2	0	8	158	59
FQ312003_intergenic_4284724_4284780	FQ312003_intergenic_4284724_4284780	FQ312003_intergenic_4284724_4284780	0	0	0	0	0	0	0	0	0	12	3
FQ312003_intergenic_4287699_4287926	FQ312003_intergenic_4287699_4287926	FQ312003_intergenic_4287699_4287926	4	0	0	0	0	0	0	0	0	93	89
FQ312003_intergenic_4291933_4291982	FQ312003_intergenic_4291933_4291982	FQ312003_intergenic_4291933_4291982	0	0	0	0	0	0	1	0	1	158	188
FQ312003_intergenic_4292584_4292630	FQ312003_intergenic_4292584_4292630	FQ312003_intergenic_4292584_4292630	3	0	0	0	0	0	1	0	0	8	6
FQ312003_intergenic_4293634_4293717	FQ312003_intergenic_4293634_4293717	FQ312003_intergenic_4293634_4293717	0	3	0	3	1	4	0	3	8	77	102
FQ312003_intergenic_4294781_4294883	FQ312003_intergenic_4294781_4294883	FQ312003_intergenic_4294781_4294883	0	0	0	1	0	0	0	0	2	21	21
FQ312003_intergenic_429522_429896	FQ312003_intergenic_429522_429896	FQ312003_intergenic_429522_429896	6	0	0	0	0	0	0	0	2	446	447
FQ312003_intergenic_4296830_4296991	FQ312003_intergenic_4296830_4296991	FQ312003_intergenic_4296830_4296991	0	2	0	0	1	0	0	2	0	30	16
FQ312003_intergenic_4304734_4304888	FQ312003_intergenic_4304734_4304888	FQ312003_intergenic_4304734_4304888	1	0	0	1	1	0	0	0	0	20	14
FQ312003_intergenic_4312521_4312532	FQ312003_intergenic_4312521_4312532	FQ312003_intergenic_4312521_4312532	2	1	0	1	0	1	0	0	4	175	229
FQ312003_intergenic_4318205_4318502	FQ312003_intergenic_4318205_4318502	FQ312003_intergenic_4318205_4318502	3	1	0	8	2	0	3	2	11	1954	1650
FQ312003_intergenic_4318843_4318963	FQ312003_intergenic_4318843_4318963	FQ312003_intergenic_4318843_4318963	3	0	0	4	2	5	0	1	8	357	606
FQ312003_intergenic_4324695_4324748	FQ312003_intergenic_4324695_4324748	FQ312003_intergenic_4324695_4324748	1	1	0	0	0	0	0	0	2	32	44
FQ312003_intergenic_432571_432737	FQ312003_intergenic_432571_432737	FQ312003_intergenic_432571_432737	0	1	0	1	1	2	0	0	2	113	90
FQ312003_intergenic_4327048_4327150	FQ312003_intergenic_4327048_4327150	FQ312003_intergenic_4327048_4327150	2	3	7	20	0	16	0	8	37	3783	5617
FQ312003_intergenic_4328172_4328271	FQ312003_intergenic_4328172_4328271	FQ312003_intergenic_4328172_4328271	1	0	0	0	0	0	1	2	1	167	65
FQ312003_intergenic_4330163_4330518	FQ312003_intergenic_4330163_4330518	FQ312003_intergenic_4330163_4330518	6	1	0	0	0	0	4	0	0	1375	588
FQ312003_intergenic_4330937_4331100	FQ312003_intergenic_4330937_4331100	FQ312003_intergenic_4330937_4331100	3	2	0	1	1	0	0	0	2	690	663
FQ312003_intergenic_4334797_4334949	FQ312003_intergenic_4334797_4334949	FQ312003_intergenic_4334797_4334949	7	0	0	0	2	0	0	0	0	84	61
FQ312003_intergenic_4336771_4336904	FQ312003_intergenic_4336771_4336904	FQ312003_intergenic_4336771_4336904	0	0	0	0	0	0	0	0	1	61	43
FQ312003_intergenic_4338130_4338164	FQ312003_intergenic_4338130_4338164	FQ312003_intergenic_4338130_4338164	3	1	0	0	0	0	0	0	1	45	48
FQ312003_intergenic_4339822_4339915	FQ312003_intergenic_4339822_4339915	FQ312003_intergenic_4339822_4339915	0	0	0	0	0	0	2	2	4	56	29
FQ312003_intergenic_4340907_4340970	FQ312003_intergenic_4340907_4340970	FQ312003_intergenic_4340907_4340970	3	0	0	2	0	0	0	0	2	83	187
FQ312003_intergenic_4343933_4344090	FQ312003_intergenic_4343933_4344090	FQ312003_intergenic_4343933_4344090	0	0	0	0	0	0	0	0	4	71	43
FQ312003_intergenic_4348481_4348688	FQ312003_intergenic_4348481_4348688	FQ312003_intergenic_4348481_4348688	0	2	0	0	1	0	0	0	0	15	9
FQ312003_intergenic_434965_435032	FQ312003_intergenic_434965_435032	FQ312003_intergenic_434965_435032	1	0	0	1	2	0	1	0	0	641	318
FQ312003_intergenic_4354637_4354696	FQ312003_intergenic_4354637_4354696	FQ312003_intergenic_4354637_4354696	1	3	0	0	0	0	3	4	2	12	15
FQ312003_intergenic_4356531_4356640	FQ312003_intergenic_4356531_4356640	FQ312003_intergenic_4356531_4356640	0	0	0	2	0	0	0	0	0	364	288
FQ312003_intergenic_4359393_4359660	FQ312003_intergenic_4359393_4359660	FQ312003_intergenic_4359393_4359660	9	1	1	0	0	2	4	0	1	234	210
FQ312003_intergenic_4362790_4362806	FQ312003_intergenic_4362790_4362806	FQ312003_intergenic_4362790_4362806	3	0	0	1	0	0	1	0	0	52	60
FQ312003_intergenic_436345_436534	FQ312003_intergenic_436345_436534	FQ312003_intergenic_436345_436534	3	1	0	11	3	28	0	13	30	3795	2429
FQ312003_intergenic_4364284_4364467	FQ312003_intergenic_4364284_4364467	FQ312003_intergenic_4364284_4364467	4	0	0	0	4	6	0	0	4	20	52
FQ312003_intergenic_4366869_4366966	FQ312003_intergenic_4366869_4366966	FQ312003_intergenic_4366869_4366966	0	0	0	0	0	0	2	0	1	60	86
FQ312003_intergenic_436902_437152	FQ312003_intergenic_436902_437152	FQ312003_intergenic_436902_437152	4	1	1	3	0	1	0	4	11	623	464
FQ312003_intergenic_4369225_4369455	FQ312003_intergenic_4369225_4369455	FQ312003_intergenic_4369225_4369455	5	0	0	2	2	0	0	8	12	734	627
FQ312003_intergenic_4372239_4377952	FQ312003_intergenic_4372239_4377952	FQ312003_intergenic_4372239_4377952	16651	15068	94264	273890	110435	208792	2796	233354	593362	1999284	1882731
FQ312003_intergenic_4381026_4381133	FQ312003_intergenic_4381026_4381133	FQ312003_intergenic_4381026_4381133	2	0	0	2	0	0	1	4	0	413	203
FQ312003_intergenic_4381408_4381883	FQ312003_intergenic_4381408_4381883	FQ312003_intergenic_4381408_4381883	4	4	4	20	14	25	204	31	54	4796	4608
FQ312003_intergenic_4383169_4383297	FQ312003_intergenic_4383169_4383297	FQ312003_intergenic_4383169_4383297	2	0	0	0	2	1	2	0	10	99	76
FQ312003_intergenic_4384329_4384385	FQ312003_intergenic_4384329_4384385	FQ312003_intergenic_4384329_4384385	1	1	0	2	0	0	0	0	3	121	131
FQ312003_intergenic_4385623_4385941	FQ312003_intergenic_4385623_4385941	FQ312003_intergenic_4385623_4385941	0	0	16	24	7	16	28	23	71	544	1058
FQ312003_intergenic_4386972_4387188	FQ312003_intergenic_4386972_4387188	FQ312003_intergenic_4386972_4387188	5	0	2	0	5	3	0	6	20	292	404
FQ312003_intergenic_439602_439640	FQ312003_intergenic_439602_439640	FQ312003_intergenic_439602_439640	0	2	0	0	0	0	0	0	0	17	20
FQ312003_intergenic_4396333_4396630	FQ312003_intergenic_4396333_4396630	FQ312003_intergenic_4396333_4396630	2	3	0	0	0	0	0	0	2	113	30
FQ312003_intergenic_4397742_4397963	FQ312003_intergenic_4397742_4397963	FQ312003_intergenic_4397742_4397963	2	0	0	0	0	2	0	0	0	295	211
FQ312003_intergenic_4398253_4398302	FQ312003_intergenic_4398253_4398302	FQ312003_intergenic_4398253_4398302	2	1	0	0	0	0	0	0	1	1	2
FQ312003_intergenic_440197_440280	FQ312003_intergenic_440197_440280	FQ312003_intergenic_440197_440280	4	0	0	0	0	0	0	0	0	48	50
FQ312003_intergenic_4403768_4404030	FQ312003_intergenic_4403768_4404030	FQ312003_intergenic_4403768_4404030	2	0	0	0	0	0	0	26	9	356	304
FQ312003_intergenic_4407904_4407989	FQ312003_intergenic_4407904_4407989	FQ312003_intergenic_4407904_4407989	3	4	4	4	6	10	4	5	22	2789	1903
FQ312003_intergenic_4409564_4409716	FQ312003_intergenic_4409564_4409716	FQ312003_intergenic_4409564_4409716	1	1	0	1	0	0	1	0	0	81	93
FQ312003_intergenic_441145_441294	FQ312003_intergenic_441145_441294	FQ312003_intergenic_441145_441294	1	0	2	0	0	1	2	2	4	726	568
FQ312003_intergenic_4415433_4421485	FQ312003_intergenic_4415433_4421485	FQ312003_intergenic_4415433_4421485	16807	15170	94265	274112	111907	207473	2714	233564	593772	2060282	1918928
FQ312003_intergenic_4422024_4422079	FQ312003_intergenic_4422024_4422079	FQ312003_intergenic_4422024_4422079	0	0	0	0	0	0	0	0	1	25	11
FQ312003_intergenic_4423110_4423277	FQ312003_intergenic_4423110_4423277	FQ312003_intergenic_4423110_4423277	3	0	0	0	0	0	1	0	0	33	22
FQ312003_intergenic_44236_44261	FQ312003_intergenic_44236_44261	FQ312003_intergenic_44236_44261	1	0	0	0	0	0	0	0	1	12	14
FQ312003_intergenic_4429375_4429577	FQ312003_intergenic_4429375_4429577	FQ312003_intergenic_4429375_4429577	2	0	0	0	2	0	0	0	1	18	19
FQ312003_intergenic_4433362_4433602	FQ312003_intergenic_4433362_4433602	FQ312003_intergenic_4433362_4433602	2	0	2	2	0	0	0	4	0	135	90
FQ312003_intergenic_443377_443401	FQ312003_intergenic_443377_443401	FQ312003_intergenic_443377_443401	2	0	0	0	0	0	4	0	0	37	31
FQ312003_intergenic_4438996_4439156	FQ312003_intergenic_4438996_4439156	FQ312003_intergenic_4438996_4439156	2	0	0	0	0	0	1	0	0	61	52
FQ312003_intergenic_4439986_4440081	FQ312003_intergenic_4439986_4440081	FQ312003_intergenic_4439986_4440081	0	0	0	0	0	0	32	1	0	10	6
FQ312003_intergenic_4440473_4440620	FQ312003_intergenic_4440473_4440620	FQ312003_intergenic_4440473_4440620	2	2	0	0	0	0	0	0	0	137	66
FQ312003_intergenic_4445622_4445684	FQ312003_intergenic_4445622_4445684	FQ312003_intergenic_4445622_4445684	3	1	0	0	0	0	0	0	0	4	3
FQ312003_intergenic_4448621_4448847	FQ312003_intergenic_4448621_4448847	FQ312003_intergenic_4448621_4448847	1	5	0	0	2	2	0	0	0	21	13
FQ312003_intergenic_4454228_4454311	FQ312003_intergenic_4454228_4454311	FQ312003_intergenic_4454228_4454311	1	1	0	2	0	0	0	0	0	5	2
FQ312003_intergenic_445605_445676	FQ312003_intergenic_445605_445676	FQ312003_intergenic_445605_445676	2	0	0	0	0	0	1	0	0	29	21
FQ312003_intergenic_4457372_4457430	FQ312003_intergenic_4457372_4457430	FQ312003_intergenic_4457372_4457430	3	0	0	0	0	0	0	0	1	3	1
FQ312003_intergenic_4458754_4459228	FQ312003_intergenic_4458754_4459228	FQ312003_intergenic_4458754_4459228	2	4	0	0	0	0	2	2	2	196	69
FQ312003_intergenic_4459677_4459708	FQ312003_intergenic_4459677_4459708	FQ312003_intergenic_4459677_4459708	2	1	0	0	0	0	0	0	1	14	24
FQ312003_intergenic_4461159_4461402	FQ312003_intergenic_4461159_4461402	FQ312003_intergenic_4461159_4461402	6	6	2	2	0	1	0	0	5	281	150
FQ312003_intergenic_4463153_4463495	FQ312003_intergenic_4463153_4463495	FQ312003_intergenic_4463153_4463495	4	2	0	0	0	0	0	0	2	48	49
FQ312003_intergenic_4467371_4467412	FQ312003_intergenic_4467371_4467412	FQ312003_intergenic_4467371_4467412	2	0	0	0	1	0	0	0	1	66	52
FQ312003_intergenic_4467924_4467988	FQ312003_intergenic_4467924_4467988	FQ312003_intergenic_4467924_4467988	2	0	0	0	0	1	0	0	1	71	84
FQ312003_intergenic_4470539_4470569	FQ312003_intergenic_4470539_4470569	FQ312003_intergenic_4470539_4470569	3	0	0	0	0	0	1	1	1	0	3
FQ312003_intergenic_4471870_4472121	FQ312003_intergenic_4471870_4472121	FQ312003_intergenic_4471870_4472121	3	0	0	2	0	0	1	0	0	17	20
FQ312003_intergenic_4474779_4474841	FQ312003_intergenic_4474779_4474841	FQ312003_intergenic_4474779_4474841	3	1	0	0	0	0	1	0	1	10	11
FQ312003_intergenic_4475860_4475939	FQ312003_intergenic_4475860_4475939	FQ312003_intergenic_4475860_4475939	4	0	0	0	0	0	0	0	0	10	8
FQ312003_intergenic_4479943_4480012	FQ312003_intergenic_4479943_4480012	FQ312003_intergenic_4479943_4480012	5	0	0	1	0	2	0	1	3	2135	1296
FQ312003_intergenic_4481199_4481276	FQ312003_intergenic_4481199_4481276	FQ312003_intergenic_4481199_4481276	2	0	0	0	2	0	0	0	0	40	91
FQ312003_intergenic_4482703_4482730	FQ312003_intergenic_4482703_4482730	FQ312003_intergenic_4482703_4482730	1	1	0	2	0	0	2	0	1	605	351
FQ312003_intergenic_4483658_4483803	FQ312003_intergenic_4483658_4483803	FQ312003_intergenic_4483658_4483803	1	0	0	0	2	0	0	0	1	171	140
FQ312003_intergenic_4486301_4486412	FQ312003_intergenic_4486301_4486412	FQ312003_intergenic_4486301_4486412	2	1	2	0	0	0	0	0	0	176	216
FQ312003_intergenic_4486711_4486784	FQ312003_intergenic_4486711_4486784	FQ312003_intergenic_4486711_4486784	0	1	0	0	0	0	3	0	0	75	99
FQ312003_intergenic_4490460_4490544	FQ312003_intergenic_4490460_4490544	FQ312003_intergenic_4490460_4490544	0	2	0	0	0	0	0	1	0	8	15
FQ312003_intergenic_4491839_4491924	FQ312003_intergenic_4491839_4491924	FQ312003_intergenic_4491839_4491924	2	0	0	0	1	0	0	0	1	70	42
FQ312003_intergenic_4492739_4492766	FQ312003_intergenic_4492739_4492766	FQ312003_intergenic_4492739_4492766	5	0	0	0	0	0	0	0	3	62	80
FQ312003_intergenic_4494424_4494454	FQ312003_intergenic_4494424_4494454	FQ312003_intergenic_4494424_4494454	0	0	0	1	0	0	0	0	2	20	18
FQ312003_intergenic_4497462_4497527	FQ312003_intergenic_4497462_4497527	FQ312003_intergenic_4497462_4497527	0	2	0	0	0	0	0	0	1	52	29
FQ312003_intergenic_4498159_4499098	FQ312003_intergenic_4498159_4499098	FQ312003_intergenic_4498159_4499098	4	4	0	0	0	0	2	0	2	1668	538
FQ312003_intergenic_450117_450230	FQ312003_intergenic_450117_450230	FQ312003_intergenic_450117_450230	0	1	0	1	0	1	0	0	0	145	164
FQ312003_intergenic_4522602_4522778	FQ312003_intergenic_4522602_4522778	FQ312003_intergenic_4522602_4522778	5	1	2	1	0	0	0	0	3	76	150
FQ312003_intergenic_4523161_4523622	FQ312003_intergenic_4523161_4523622	FQ312003_intergenic_4523161_4523622	4	7	0	0	0	2	0	3	2	470	550
FQ312003_intergenic_452386_452693	FQ312003_intergenic_452386_452693	FQ312003_intergenic_452386_452693	5	4	0	2	4	0	2	4	13	1482	1017
FQ312003_intergenic_4526181_4526372	FQ312003_intergenic_4526181_4526372	FQ312003_intergenic_4526181_4526372	4	0	0	2	0	0	0	3	4	767	1667
FQ312003_intergenic_4527142_4527387	FQ312003_intergenic_4527142_4527387	FQ312003_intergenic_4527142_4527387	3	3	0	0	1	1	0	2	2	270	332
FQ312003_intergenic_4528838_4528886	FQ312003_intergenic_4528838_4528886	FQ312003_intergenic_4528838_4528886	1	0	0	0	1	0	2	0	0	6	4
FQ312003_intergenic_4534811_4534955	FQ312003_intergenic_4534811_4534955	FQ312003_intergenic_4534811_4534955	4	3	0	1	4	1	0	4	3	16	22
FQ312003_intergenic_4537015_4537100	FQ312003_intergenic_4537015_4537100	FQ312003_intergenic_4537015_4537100	0	0	0	1	0	0	0	1	0	177	117
FQ312003_intergenic_4544014_4544257	FQ312003_intergenic_4544014_4544257	FQ312003_intergenic_4544014_4544257	0	2	0	2	0	0	0	0	0	128	102
FQ312003_intergenic_4545669_4545725	FQ312003_intergenic_4545669_4545725	FQ312003_intergenic_4545669_4545725	1	1	0	2	0	0	0	0	0	5	8
FQ312003_intergenic_4546438_4546591	FQ312003_intergenic_4546438_4546591	FQ312003_intergenic_4546438_4546591	1	3	0	1	0	0	0	0	4	187	147
FQ312003_intergenic_4548840_4549093	FQ312003_intergenic_4548840_4549093	FQ312003_intergenic_4548840_4549093	5	0	0	0	0	0	2	0	4	50	43
FQ312003_intergenic_4550103_4550259	FQ312003_intergenic_4550103_4550259	FQ312003_intergenic_4550103_4550259	1	3	0	0	0	2	44	3	2	178	196
FQ312003_intergenic_4550795_4550845	FQ312003_intergenic_4550795_4550845	FQ312003_intergenic_4550795_4550845	2	1	0	1	1	0	0	1	1	74	78
FQ312003_intergenic_4551390_4551408	FQ312003_intergenic_4551390_4551408	FQ312003_intergenic_4551390_4551408	1	0	0	1	0	0	1	0	0	62	47
FQ312003_intergenic_4551845_4552211	FQ312003_intergenic_4551845_4552211	FQ312003_intergenic_4551845_4552211	6	4	0	0	0	0	0	1	4	708	514
FQ312003_intergenic_4553815_4553880	FQ312003_intergenic_4553815_4553880	FQ312003_intergenic_4553815_4553880	6	1	2	1	3	6	0	4	9	30	50
FQ312003_intergenic_455559_455619	FQ312003_intergenic_455559_455619	FQ312003_intergenic_455559_455619	3	0	0	0	0	0	0	0	5	14	9
FQ312003_intergenic_4557370_4557402	FQ312003_intergenic_4557370_4557402	FQ312003_intergenic_4557370_4557402	1	0	0	0	0	0	2	0	0	42	37
FQ312003_intergenic_4558841_4558879	FQ312003_intergenic_4558841_4558879	FQ312003_intergenic_4558841_4558879	2	0	0	0	0	0	0	0	4	105	255
FQ312003_intergenic_4559742_4559938	FQ312003_intergenic_4559742_4559938	FQ312003_intergenic_4559742_4559938	0	0	0	1	0	0	0	0	1	490	426
FQ312003_intergenic_4562310_4562438	FQ312003_intergenic_4562310_4562438	FQ312003_intergenic_4562310_4562438	3	0	0	0	0	4	0	0	0	143	119
FQ312003_intergenic_4563472_4563639	FQ312003_intergenic_4563472_4563639	FQ312003_intergenic_4563472_4563639	4	1	0	0	0	0	0	0	0	42	39
FQ312003_intergenic_4569790_4569835	FQ312003_intergenic_4569790_4569835	FQ312003_intergenic_4569790_4569835	0	1	0	0	0	0	0	0	0	9	8
FQ312003_intergenic_4570203_4570418	FQ312003_intergenic_4570203_4570418	FQ312003_intergenic_4570203_4570418	4	0	0	0	3	2	4	0	1	91	58
FQ312003_intergenic_4572867_4573121	FQ312003_intergenic_4572867_4573121	FQ312003_intergenic_4572867_4573121	5	2	0	0	0	0	0	0	2	372	169
FQ312003_intergenic_4579211_4579413	FQ312003_intergenic_4579211_4579413	FQ312003_intergenic_4579211_4579413	3	4	0	0	0	2	0	0	3	146	114
FQ312003_intergenic_4580420_4580612	FQ312003_intergenic_4580420_4580612	FQ312003_intergenic_4580420_4580612	2	2	0	0	0	0	1	1	5	81	62
FQ312003_intergenic_458212_458320	FQ312003_intergenic_458212_458320	FQ312003_intergenic_458212_458320	4	3	3	13	2	10	0	5	28	2895	2685
FQ312003_intergenic_4582388_4582551	FQ312003_intergenic_4582388_4582551	FQ312003_intergenic_4582388_4582551	0	0	0	0	0	0	0	0	0	8676	3239
FQ312003_intergenic_4582874_4583089	FQ312003_intergenic_4582874_4583089	FQ312003_intergenic_4582874_4583089	0	3	4	3	5	4	0	0	7	342	356
FQ312003_intergenic_4583972_4584118	FQ312003_intergenic_4583972_4584118	FQ312003_intergenic_4583972_4584118	7	4	15	37	25	29	0	53	103	103	200
FQ312003_intergenic_4585149_4586080	FQ312003_intergenic_4585149_4586080	FQ312003_intergenic_4585149_4586080	6	3	0	2	0	1	5	0	8	361	225
FQ312003_intergenic_4586963_4587300	FQ312003_intergenic_4586963_4587300	FQ312003_intergenic_4586963_4587300	0	2	0	3	1	2	0	0	1	172	141
FQ312003_intergenic_4590040_4590059	FQ312003_intergenic_4590040_4590059	FQ312003_intergenic_4590040_4590059	3	0	0	0	0	0	1	0	0	34	26
FQ312003_intergenic_4591345_4591475	FQ312003_intergenic_4591345_4591475	FQ312003_intergenic_4591345_4591475	0	0	0	0	2	0	2	1	2	470	504
FQ312003_intergenic_4593013_4593213	FQ312003_intergenic_4593013_4593213	FQ312003_intergenic_4593013_4593213	2	1	2	5	3	8	4	4	9	2340	1627
FQ312003_intergenic_4595130_4595304	FQ312003_intergenic_4595130_4595304	FQ312003_intergenic_4595130_4595304	1	0	2	3	2	9	0	1	2	606	793
FQ312003_intergenic_4597389_4597513	FQ312003_intergenic_4597389_4597513	FQ312003_intergenic_4597389_4597513	2	0	1	4	4	10	0	3	3	55	72
FQ312003_intergenic_4598891_4599071	FQ312003_intergenic_4598891_4599071	FQ312003_intergenic_4598891_4599071	2	2	0	0	0	0	0	0	0	89	103
FQ312003_intergenic_460161_460256	FQ312003_intergenic_460161_460256	FQ312003_intergenic_460161_460256	4	0	0	0	0	0	0	0	2	87	200
FQ312003_intergenic_4601875_4602030	FQ312003_intergenic_4601875_4602030	FQ312003_intergenic_4601875_4602030	8	1	2	0	0	0	0	0	0	163	142
FQ312003_intergenic_4606404_4606625	FQ312003_intergenic_4606404_4606625	FQ312003_intergenic_4606404_4606625	0	2	0	2	0	0	0	0	6	369	385
FQ312003_intergenic_4607704_4607828	FQ312003_intergenic_4607704_4607828	FQ312003_intergenic_4607704_4607828	0	0	0	0	0	0	0	0	0	18	26
FQ312003_intergenic_46078_46139	FQ312003_intergenic_46078_46139	FQ312003_intergenic_46078_46139	0	0	0	0	0	0	0	0	3	132	95
FQ312003_intergenic_4616776_4617759	FQ312003_intergenic_4616776_4617759	FQ312003_intergenic_4616776_4617759	14	6	6	14	16	24	622	32	115	4629	2455
FQ312003_intergenic_4626867_4626980	FQ312003_intergenic_4626867_4626980	FQ312003_intergenic_4626867_4626980	5	3	6	3	5	9	0	6	24	385	641
FQ312003_intergenic_4629348_4629625	FQ312003_intergenic_4629348_4629625	FQ312003_intergenic_4629348_4629625	2	0	0	4	1	0	0	2	3	103	84
FQ312003_intergenic_4631025_4631130	FQ312003_intergenic_4631025_4631130	FQ312003_intergenic_4631025_4631130	3	0	0	2	0	0	0	0	3	72	63
FQ312003_intergenic_4634955_4634985	FQ312003_intergenic_4634955_4634985	FQ312003_intergenic_4634955_4634985	0	0	0	0	0	0	0	1	0	5	8
FQ312003_intergenic_4642647_4642729	FQ312003_intergenic_4642647_4642729	FQ312003_intergenic_4642647_4642729	0	0	0	0	0	0	0	0	0	57	34
FQ312003_intergenic_4645501_4645762	FQ312003_intergenic_4645501_4645762	FQ312003_intergenic_4645501_4645762	2	0	0	0	0	1	0	0	0	52	20
FQ312003_intergenic_464697_464743	FQ312003_intergenic_464697_464743	FQ312003_intergenic_464697_464743	2	0	0	0	0	0	0	0	0	6	11
FQ312003_intergenic_4650270_4650297	FQ312003_intergenic_4650270_4650297	FQ312003_intergenic_4650270_4650297	0	1	0	0	0	0	0	0	0	2	1
FQ312003_intergenic_4650674_4650766	FQ312003_intergenic_4650674_4650766	FQ312003_intergenic_4650674_4650766	0	1	0	0	0	0	0	0	0	164	97
FQ312003_intergenic_4652584_4652630	FQ312003_intergenic_4652584_4652630	FQ312003_intergenic_4652584_4652630	0	0	3	2	0	0	0	0	1	11	24
FQ312003_intergenic_4654343_4654419	FQ312003_intergenic_4654343_4654419	FQ312003_intergenic_4654343_4654419	3	0	0	0	0	3	0	0	2	132	132
FQ312003_intergenic_4655183_4655377	FQ312003_intergenic_4655183_4655377	FQ312003_intergenic_4655183_4655377	0	0	0	2	0	0	0	0	2	903	604
FQ312003_intergenic_465928_465996	FQ312003_intergenic_465928_465996	FQ312003_intergenic_465928_465996	2	0	0	0	0	0	0	0	0	60	52
FQ312003_intergenic_4662134_4662300	FQ312003_intergenic_4662134_4662300	FQ312003_intergenic_4662134_4662300	3	4	0	0	4	1	1	9	5	2641	2019
FQ312003_intergenic_4663689_4663914	FQ312003_intergenic_4663689_4663914	FQ312003_intergenic_4663689_4663914	2	3	0	6	4	3	2	2	17	2415	1083
FQ312003_intergenic_466445_466972	FQ312003_intergenic_466445_466972	FQ312003_intergenic_466445_466972	9	1	0	4	4	2	3	4	8	846	572
FQ312003_intergenic_4665650_4665731	FQ312003_intergenic_4665650_4665731	FQ312003_intergenic_4665650_4665731	1	2	4	8	4	5	0	11	14	473	687
FQ312003_intergenic_4666471_4666582	FQ312003_intergenic_4666471_4666582	FQ312003_intergenic_4666471_4666582	0	0	0	2	1	0	0	2	2	109	168
FQ312003_intergenic_4674962_4675271	FQ312003_intergenic_4674962_4675271	FQ312003_intergenic_4674962_4675271	7	0	0	0	1	0	5	0	0	47	20
FQ312003_intergenic_4675903_4676028	FQ312003_intergenic_4675903_4676028	FQ312003_intergenic_4675903_4676028	2	2	0	1	0	0	2	0	3	71	176
FQ312003_intergenic_4677128_4677201	FQ312003_intergenic_4677128_4677201	FQ312003_intergenic_4677128_4677201	1	0	0	0	0	0	2	0	1	22	19
FQ312003_intergenic_4678682_4679071	FQ312003_intergenic_4678682_4679071	FQ312003_intergenic_4678682_4679071	0	0	0	0	2	0	4	0	2	499	573
FQ312003_intergenic_467937_468135	FQ312003_intergenic_467937_468135	FQ312003_intergenic_467937_468135	0	0	0	3	0	2	0	0	4	283	219
FQ312003_intergenic_4681490_4681847	FQ312003_intergenic_4681490_4681847	FQ312003_intergenic_4681490_4681847	2	1	0	0	2	2	0	0	0	62	22
FQ312003_intergenic_4683385_4683636	FQ312003_intergenic_4683385_4683636	FQ312003_intergenic_4683385_4683636	8	4	0	0	0	0	0	1	1	152	97
FQ312003_intergenic_4686395_4686415	FQ312003_intergenic_4686395_4686415	FQ312003_intergenic_4686395_4686415	0	0	0	0	2	0	1	0	0	43	24
FQ312003_intergenic_4687341_4687514	FQ312003_intergenic_4687341_4687514	FQ312003_intergenic_4687341_4687514	2	1	0	0	0	0	0	0	1	7	0
FQ312003_intergenic_468776_468826	FQ312003_intergenic_468776_468826	FQ312003_intergenic_468776_468826	1	0	0	0	0	0	0	0	0	75	67
FQ312003_intergenic_4694985_4695291	FQ312003_intergenic_4694985_4695291	FQ312003_intergenic_4694985_4695291	4	2	0	0	0	0	0	2	3	24	8
FQ312003_intergenic_4697342_4697421	FQ312003_intergenic_4697342_4697421	FQ312003_intergenic_4697342_4697421	1	0	0	0	0	0	1	0	2	1	2
FQ312003_intergenic_4699844_4699903	FQ312003_intergenic_4699844_4699903	FQ312003_intergenic_4699844_4699903	0	0	0	0	0	0	0	0	0	31	15
FQ312003_intergenic_4704446_4704473	FQ312003_intergenic_4704446_4704473	FQ312003_intergenic_4704446_4704473	0	0	0	0	0	0	0	0	1	7	3
FQ312003_intergenic_4713066_4713085	FQ312003_intergenic_4713066_4713085	FQ312003_intergenic_4713066_4713085	0	0	0	0	0	0	1	0	2	20	63
FQ312003_intergenic_4715325_4715428	FQ312003_intergenic_4715325_4715428	FQ312003_intergenic_4715325_4715428	0	0	0	1	0	0	0	0	4	1775	1698
FQ312003_intergenic_4718853_4718889	FQ312003_intergenic_4718853_4718889	FQ312003_intergenic_4718853_4718889	0	0	0	0	0	1	0	1	2	0	4
FQ312003_intergenic_4719938_4720220	FQ312003_intergenic_4719938_4720220	FQ312003_intergenic_4719938_4720220	8	6	4	19	1	4	0	12	54	1636	679
FQ312003_intergenic_4723030_4723044	FQ312003_intergenic_4723030_4723044	FQ312003_intergenic_4723030_4723044	1	0	0	0	0	0	0	0	0	80	105
FQ312003_intergenic_4726254_4726339	FQ312003_intergenic_4726254_4726339	FQ312003_intergenic_4726254_4726339	1	0	0	0	0	0	0	0	0	27	959
FQ312003_intergenic_4731179_4731753	FQ312003_intergenic_4731179_4731753	FQ312003_intergenic_4731179_4731753	12	6	0	1	1	0	2	0	4	92	552
FQ312003_intergenic_4733385_4733449	FQ312003_intergenic_4733385_4733449	FQ312003_intergenic_4733385_4733449	1	0	0	0	0	0	0	0	4	50	45
FQ312003_intergenic_4734791_4734923	FQ312003_intergenic_4734791_4734923	FQ312003_intergenic_4734791_4734923	1	0	0	0	1	0	0	0	1	71	83
FQ312003_intergenic_4736123_4736216	FQ312003_intergenic_4736123_4736216	FQ312003_intergenic_4736123_4736216	4	0	0	0	2	0	0	0	2	30	16
FQ312003_intergenic_4737505_4737545	FQ312003_intergenic_4737505_4737545	FQ312003_intergenic_4737505_4737545	1	0	0	0	1	2	0	0	0	10	16
FQ312003_intergenic_4740945_4740980	FQ312003_intergenic_4740945_4740980	FQ312003_intergenic_4740945_4740980	3	0	1	2	0	0	0	0	1	31	90
FQ312003_intergenic_4742756_4742886	FQ312003_intergenic_4742756_4742886	FQ312003_intergenic_4742756_4742886	3	0	0	0	0	0	0	0	3	910	646
FQ312003_intergenic_4745170_4745263	FQ312003_intergenic_4745170_4745263	FQ312003_intergenic_4745170_4745263	3	2	0	0	0	0	0	0	2	21	36
FQ312003_intergenic_4747647_4747706	FQ312003_intergenic_4747647_4747706	FQ312003_intergenic_4747647_4747706	2	0	0	0	0	0	2	0	0	6	10
FQ312003_intergenic_4749628_4749743	FQ312003_intergenic_4749628_4749743	FQ312003_intergenic_4749628_4749743	3	2	0	1	4	0	0	0	1	20	6
FQ312003_intergenic_4751422_4751846	FQ312003_intergenic_4751422_4751846	FQ312003_intergenic_4751422_4751846	1	0	0	0	0	0	0	0	3	151	103
FQ312003_intergenic_4752217_4752495	FQ312003_intergenic_4752217_4752495	FQ312003_intergenic_4752217_4752495	4	2	0	4	1	0	0	0	0	52	51
FQ312003_intergenic_4757198_4757209	FQ312003_intergenic_4757198_4757209	FQ312003_intergenic_4757198_4757209	0	0	0	0	0	0	0	0	0	52	44
FQ312003_intergenic_4761868_4761904	FQ312003_intergenic_4761868_4761904	FQ312003_intergenic_4761868_4761904	0	1	0	0	2	1	0	0	1	806	672
FQ312003_intergenic_477195_477303	FQ312003_intergenic_477195_477303	FQ312003_intergenic_477195_477303	1	2	2	0	1	0	0	0	2	2444	2030
FQ312003_intergenic_4772473_4772880	FQ312003_intergenic_4772473_4772880	FQ312003_intergenic_4772473_4772880	3	0	0	0	0	0	0	2	2	120	167
FQ312003_intergenic_4774024_4774473	FQ312003_intergenic_4774024_4774473	FQ312003_intergenic_4774024_4774473	2	0	0	0	0	0	2	0	1	132	79
FQ312003_intergenic_4776468_4776855	FQ312003_intergenic_4776468_4776855	FQ312003_intergenic_4776468_4776855	2	0	0	6	0	0	3	0	3	3680	2868
FQ312003_intergenic_4777565_4777973	FQ312003_intergenic_4777565_4777973	FQ312003_intergenic_4777565_4777973	3	2	0	0	0	0	0	7	8	6752	4795
FQ312003_intergenic_4778812_4778986	FQ312003_intergenic_4778812_4778986	FQ312003_intergenic_4778812_4778986	1	1	0	0	1	0	0	0	0	87	202
FQ312003_intergenic_4779999_4780102	FQ312003_intergenic_4779999_4780102	FQ312003_intergenic_4779999_4780102	2	0	0	1	1	3	1	6	3	360	128
FQ312003_intergenic_4781336_4781584	FQ312003_intergenic_4781336_4781584	FQ312003_intergenic_4781336_4781584	2	0	0	1	0	0	1	2	0	145	112
FQ312003_intergenic_4783473_4783668	FQ312003_intergenic_4783473_4783668	FQ312003_intergenic_4783473_4783668	4	1	0	0	0	0	0	0	1	49	43
FQ312003_intergenic_4783922_4784173	FQ312003_intergenic_4783922_4784173	FQ312003_intergenic_4783922_4784173	1	1	0	0	1	0	0	4	2	563	341
FQ312003_intergenic_4784721_4784858	FQ312003_intergenic_4784721_4784858	FQ312003_intergenic_4784721_4784858	0	3	0	2	0	0	0	0	0	53	93
FQ312003_intergenic_4786608_4786625	FQ312003_intergenic_4786608_4786625	FQ312003_intergenic_4786608_4786625	4	0	0	0	0	0	0	0	2	7	17
FQ312003_intergenic_4789041_4789297	FQ312003_intergenic_4789041_4789297	FQ312003_intergenic_4789041_4789297	4	5	0	0	2	1	0	0	1	134	122
FQ312003_intergenic_4789774_4789812	FQ312003_intergenic_4789774_4789812	FQ312003_intergenic_4789774_4789812	0	2	0	2	0	0	1	0	0	372	260
FQ312003_intergenic_4791098_4791216	FQ312003_intergenic_4791098_4791216	FQ312003_intergenic_4791098_4791216	0	0	0	0	0	0	1	0	1	159	117
FQ312003_intergenic_4793917_4794294	FQ312003_intergenic_4793917_4794294	FQ312003_intergenic_4793917_4794294	0	2	0	2	2	0	0	0	4	792	584
FQ312003_intergenic_4794911_4794990	FQ312003_intergenic_4794911_4794990	FQ312003_intergenic_4794911_4794990	3	1	0	0	0	0	0	0	3	326	131
FQ312003_intergenic_4798013_4798138	FQ312003_intergenic_4798013_4798138	FQ312003_intergenic_4798013_4798138	1	0	0	0	0	1	2	0	0	30	10
FQ312003_intergenic_4801235_4801291	FQ312003_intergenic_4801235_4801291	FQ312003_intergenic_4801235_4801291	3	0	0	0	0	0	0	1	1	13	13
FQ312003_intergenic_4804902_4804998	FQ312003_intergenic_4804902_4804998	FQ312003_intergenic_4804902_4804998	3	0	0	0	0	0	4	1	2	143	111
FQ312003_intergenic_4806014_4806181	FQ312003_intergenic_4806014_4806181	FQ312003_intergenic_4806014_4806181	2	3	1	1	0	0	0	0	0	59	55
FQ312003_intergenic_4810349_4810614	FQ312003_intergenic_4810349_4810614	FQ312003_intergenic_4810349_4810614	2	0	2	1	0	0	2	0	4	58	40
FQ312003_intergenic_4812377_4812599	FQ312003_intergenic_4812377_4812599	FQ312003_intergenic_4812377_4812599	6	2	0	2	0	1	2	0	0	34	30
FQ312003_intergenic_4820199_4820231	FQ312003_intergenic_4820199_4820231	FQ312003_intergenic_4820199_4820231	1	0	1	2	1	0	0	1	2	84	70
FQ312003_intergenic_4822525_4822805	FQ312003_intergenic_4822525_4822805	FQ312003_intergenic_4822525_4822805	0	3	2	7	0	1	0	4	5	316	294
FQ312003_intergenic_4826173_4826649	FQ312003_intergenic_4826173_4826649	FQ312003_intergenic_4826173_4826649	4	3	0	0	1	0	2	1	1	66	70
FQ312003_intergenic_482619_482784	FQ312003_intergenic_482619_482784	FQ312003_intergenic_482619_482784	0	0	0	0	0	0	0	0	2	6	13
FQ312003_intergenic_4828620_4828669	FQ312003_intergenic_4828620_4828669	FQ312003_intergenic_4828620_4828669	0	0	0	2	0	0	0	0	1	42	63
FQ312003_intergenic_4829559_4829578	FQ312003_intergenic_4829559_4829578	FQ312003_intergenic_4829559_4829578	3	1	0	0	0	0	0	0	0	15	33
FQ312003_intergenic_4830744_4830893	FQ312003_intergenic_4830744_4830893	FQ312003_intergenic_4830744_4830893	3	0	0	0	0	0	1	0	0	484	167
FQ312003_intergenic_4831231_4831670	FQ312003_intergenic_4831231_4831670	FQ312003_intergenic_4831231_4831670	7	1	2	0	4	5	21	7	16	865	548
FQ312003_intergenic_483605_483643	FQ312003_intergenic_483605_483643	FQ312003_intergenic_483605_483643	1	1	0	0	0	0	0	0	0	22	12
FQ312003_intergenic_4836111_4836411	FQ312003_intergenic_4836111_4836411	FQ312003_intergenic_4836111_4836411	11	3	6	3	2	0	2	5	3	6524	4445
FQ312003_intergenic_4837130_4837442	FQ312003_intergenic_4837130_4837442	FQ312003_intergenic_4837130_4837442	4	0	2	3	1	2	0	2	10	806	575
FQ312003_intergenic_4841802_4841942	FQ312003_intergenic_4841802_4841942	FQ312003_intergenic_4841802_4841942	0	0	0	0	0	0	0	0	0	63	34
FQ312003_intergenic_4842841_4842863	FQ312003_intergenic_4842841_4842863	FQ312003_intergenic_4842841_4842863	1	0	0	1	1	1	0	4	2	3	5
FQ312003_intergenic_4845562_4845670	FQ312003_intergenic_4845562_4845670	FQ312003_intergenic_4845562_4845670	1	0	2	0	5	1	0	0	5	852	948
FQ312003_intergenic_4850140_4850203	FQ312003_intergenic_4850140_4850203	FQ312003_intergenic_4850140_4850203	0	2	0	0	1	0	2	0	0	66	65
FQ312003_intergenic_4851731_4851942	FQ312003_intergenic_4851731_4851942	FQ312003_intergenic_4851731_4851942	1	1	2	0	1	0	0	0	0	656	399
FQ312003_intergenic_4853738_4853753	FQ312003_intergenic_4853738_4853753	FQ312003_intergenic_4853738_4853753	4	1	0	0	0	0	0	0	0	3	13
FQ312003_intergenic_4856289_4856311	FQ312003_intergenic_4856289_4856311	FQ312003_intergenic_4856289_4856311	1	0	0	0	0	0	0	0	0	82	105
FQ312003_intergenic_4857672_4857688	FQ312003_intergenic_4857672_4857688	FQ312003_intergenic_4857672_4857688	0	0	1	0	2	0	1	0	0	14	15
FQ312003_intergenic_4859457_4859528	FQ312003_intergenic_4859457_4859528	FQ312003_intergenic_4859457_4859528	1	1	0	0	0	0	0	1	0	55	35
FQ312003_intergenic_4864166_4864276	FQ312003_intergenic_4864166_4864276	FQ312003_intergenic_4864166_4864276	0	0	0	0	0	2	0	0	3	243	202
FQ312003_intergenic_4865553_4865649	FQ312003_intergenic_4865553_4865649	FQ312003_intergenic_4865553_4865649	2	1	0	7	0	0	1	0	3	26	94
FQ312003_intergenic_4874025_4874262	FQ312003_intergenic_4874025_4874262	FQ312003_intergenic_4874025_4874262	2	2	0	0	0	0	0	2	0	319	372
FQ312003_intergenic_4875035_4875133	FQ312003_intergenic_4875035_4875133	FQ312003_intergenic_4875035_4875133	0	2	0	0	0	3	0	0	0	1449	711
FQ312003_intergenic_4875734_4875899	FQ312003_intergenic_4875734_4875899	FQ312003_intergenic_4875734_4875899	4	0	0	0	0	0	0	2	0	63	118
FQ312003_intergenic_4876953_4877251	FQ312003_intergenic_4876953_4877251	FQ312003_intergenic_4876953_4877251	2	0	1	4	0	4	0	1	5	6939	2820
FQ312003_intergenic_489256_489456	FQ312003_intergenic_489256_489456	FQ312003_intergenic_489256_489456	2	0	2	2	2	0	2	0	7	255	173
FQ312003_intergenic_491304_491424	FQ312003_intergenic_491304_491424	FQ312003_intergenic_491304_491424	2	0	0	0	0	0	0	0	2	28	59
FQ312003_intergenic_497684_498035	FQ312003_intergenic_497684_498035	FQ312003_intergenic_497684_498035	3	2	2	2	0	2	0	0	5	214	241
FQ312003_intergenic_500288_500436	FQ312003_intergenic_500288_500436	FQ312003_intergenic_500288_500436	5	2	0	0	1	1	2	0	0	84	56
FQ312003_intergenic_500855_501100	FQ312003_intergenic_500855_501100	FQ312003_intergenic_500855_501100	0	3	0	0	2	2	3	3	10	1024	637
FQ312003_intergenic_502500_502645	FQ312003_intergenic_502500_502645	FQ312003_intergenic_502500_502645	0	2	0	2	0	0	0	1	3	535	420
FQ312003_intergenic_503370_503520	FQ312003_intergenic_503370_503520	FQ312003_intergenic_503370_503520	5	0	0	4	2	3	2	0	4	608	1136
FQ312003_intergenic_504893_504977	FQ312003_intergenic_504893_504977	FQ312003_intergenic_504893_504977	0	1	0	0	1	3	0	2	0	61	69
FQ312003_intergenic_507433_507540	FQ312003_intergenic_507433_507540	FQ312003_intergenic_507433_507540	12	4	2	13	3	3	0	17	51	2330	2179
FQ312003_intergenic_507914_508103	FQ312003_intergenic_507914_508103	FQ312003_intergenic_507914_508103	2	7	0	6	2	4	4	10	16	529	324
FQ312003_intergenic_510076_510124	FQ312003_intergenic_510076_510124	FQ312003_intergenic_510076_510124	1	1	0	0	0	0	0	0	1	2	3
FQ312003_intergenic_515692_515703	FQ312003_intergenic_515692_515703	FQ312003_intergenic_515692_515703	0	0	0	0	0	0	0	0	1	31	23
FQ312003_intergenic_51875_52229	FQ312003_intergenic_51875_52229	FQ312003_intergenic_51875_52229	3	7	0	2	0	0	2	2	2	151	55
FQ312003_intergenic_519850_519961	FQ312003_intergenic_519850_519961	FQ312003_intergenic_519850_519961	3	0	0	1	0	1	0	0	0	4	0
FQ312003_intergenic_522679_522792	FQ312003_intergenic_522679_522792	FQ312003_intergenic_522679_522792	4	2	0	1	2	0	0	1	2	397	401
FQ312003_intergenic_523885_524014	FQ312003_intergenic_523885_524014	FQ312003_intergenic_523885_524014	6	2	6	12	16	4	3	157	156	3009	5860
FQ312003_intergenic_525666_525789	FQ312003_intergenic_525666_525789	FQ312003_intergenic_525666_525789	0	0	0	1	0	0	0	0	0	16	17
FQ312003_intergenic_526823_526838	FQ312003_intergenic_526823_526838	FQ312003_intergenic_526823_526838	1	0	0	0	1	0	0	0	1	159	186
FQ312003_intergenic_527491_527568	FQ312003_intergenic_527491_527568	FQ312003_intergenic_527491_527568	2	0	0	3	0	2	0	3	3	6212	3202
FQ312003_intergenic_528290_528684	FQ312003_intergenic_528290_528684	FQ312003_intergenic_528290_528684	8	1	0	1	0	2	1	2	7	3056	1399
FQ312003_intergenic_533151_533191	FQ312003_intergenic_533151_533191	FQ312003_intergenic_533151_533191	2	0	0	1	0	1	0	0	0	621	481
FQ312003_intergenic_533946_533963	FQ312003_intergenic_533946_533963	FQ312003_intergenic_533946_533963	1	0	0	0	0	0	1	0	1	36	38
FQ312003_intergenic_539170_539679	FQ312003_intergenic_539170_539679	FQ312003_intergenic_539170_539679	10	2	0	2	3	1	0	0	5	363	368
FQ312003_intergenic_540332_540344	FQ312003_intergenic_540332_540344	FQ312003_intergenic_540332_540344	1	0	0	0	0	1	0	0	1	12	18
FQ312003_intergenic_545339_545478	FQ312003_intergenic_545339_545478	FQ312003_intergenic_545339_545478	1	0	0	1	0	0	1	0	0	93	102
FQ312003_intergenic_546224_546351	FQ312003_intergenic_546224_546351	FQ312003_intergenic_546224_546351	2	1	0	0	0	0	0	0	0	56	136
FQ312003_intergenic_548383_548434	FQ312003_intergenic_548383_548434	FQ312003_intergenic_548383_548434	1	0	0	0	0	0	2	0	0	5	33
FQ312003_intergenic_551565_551678	FQ312003_intergenic_551565_551678	FQ312003_intergenic_551565_551678	0	0	0	0	0	0	4	0	0	47	72
FQ312003_intergenic_553000_553071	FQ312003_intergenic_553000_553071	FQ312003_intergenic_553000_553071	1	0	0	0	0	0	0	0	1	21	12
FQ312003_intergenic_554825_554840	FQ312003_intergenic_554825_554840	FQ312003_intergenic_554825_554840	1	0	0	0	1	1	0	0	0	8	36
FQ312003_intergenic_555421_555521	FQ312003_intergenic_555421_555521	FQ312003_intergenic_555421_555521	3	0	0	0	0	0	0	2	5	514	1077
FQ312003_intergenic_557330_557382	FQ312003_intergenic_557330_557382	FQ312003_intergenic_557330_557382	2	0	0	0	0	0	0	0	0	9	2
FQ312003_intergenic_561878_561923	FQ312003_intergenic_561878_561923	FQ312003_intergenic_561878_561923	1	0	0	0	1	0	0	1	0	32	26
FQ312003_intergenic_565238_565291	FQ312003_intergenic_565238_565291	FQ312003_intergenic_565238_565291	2	0	0	2	0	0	1	0	1	208	228
FQ312003_intergenic_569075_569159	FQ312003_intergenic_569075_569159	FQ312003_intergenic_569075_569159	3	0	0	0	1	0	0	0	0	23	32
FQ312003_intergenic_570394_570549	FQ312003_intergenic_570394_570549	FQ312003_intergenic_570394_570549	2	1	0	0	2	1	0	0	0	140	63
FQ312003_intergenic_57240_57293	FQ312003_intergenic_57240_57293	FQ312003_intergenic_57240_57293	0	0	0	0	0	3	0	0	0	61	85
FQ312003_intergenic_575315_575440	FQ312003_intergenic_575315_575440	FQ312003_intergenic_575315_575440	0	0	0	0	0	0	2	0	1	27	14
FQ312003_intergenic_58797_58895	FQ312003_intergenic_58797_58895	FQ312003_intergenic_58797_58895	3	0	0	1	1	0	0	2	2	36	50
FQ312003_intergenic_590568_590797	FQ312003_intergenic_590568_590797	FQ312003_intergenic_590568_590797	0	0	0	0	0	0	0	0	3	5	7
FQ312003_intergenic_597164_597180	FQ312003_intergenic_597164_597180	FQ312003_intergenic_597164_597180	3	0	0	0	0	0	1	0	2	16	26
FQ312003_intergenic_598501_598572	FQ312003_intergenic_598501_598572	FQ312003_intergenic_598501_598572	2	0	0	0	0	0	0	0	1	288	209
FQ312003_intergenic_601899_601925	FQ312003_intergenic_601899_601925	FQ312003_intergenic_601899_601925	1	0	0	2	0	0	0	0	2	26	50
FQ312003_intergenic_603107_603567	FQ312003_intergenic_603107_603567	FQ312003_intergenic_603107_603567	4	0	0	0	2	0	0	0	3	2273	1416
FQ312003_intergenic_610427_610929	FQ312003_intergenic_610427_610929	FQ312003_intergenic_610427_610929	2	0	0	0	0	0	6	0	2	600	329
FQ312003_intergenic_612083_612143	FQ312003_intergenic_612083_612143	FQ312003_intergenic_612083_612143	1	1	2	0	0	0	0	0	0	212	96
FQ312003_intergenic_612841_613211	FQ312003_intergenic_612841_613211	FQ312003_intergenic_612841_613211	3	1	0	6	2	0	3	2	2	307	272
FQ312003_intergenic_613603_614241	FQ312003_intergenic_613603_614241	FQ312003_intergenic_613603_614241	6	2	2	0	2	0	3	0	0	177	93
FQ312003_intergenic_617261_618027	FQ312003_intergenic_617261_618027	FQ312003_intergenic_617261_618027	3	2	0	0	0	4	2	2	2	2995	1906
FQ312003_intergenic_619651_619765	FQ312003_intergenic_619651_619765	FQ312003_intergenic_619651_619765	1	0	0	0	0	0	0	0	0	6	4
FQ312003_intergenic_621192_621247	FQ312003_intergenic_621192_621247	FQ312003_intergenic_621192_621247	0	0	0	0	0	0	0	0	0	139	98
FQ312003_intergenic_623412_623636	FQ312003_intergenic_623412_623636	FQ312003_intergenic_623412_623636	7	3	0	0	0	0	0	0	0	384	257
FQ312003_intergenic_626421_626630	FQ312003_intergenic_626421_626630	FQ312003_intergenic_626421_626630	1	0	2	0	0	0	0	6	0	209	161
FQ312003_intergenic_628702_628767	FQ312003_intergenic_628702_628767	FQ312003_intergenic_628702_628767	2	1	0	1	0	0	1	1	1	11	25
FQ312003_intergenic_631598_631624	FQ312003_intergenic_631598_631624	FQ312003_intergenic_631598_631624	2	1	0	0	0	0	0	0	0	4	8
FQ312003_intergenic_63464_63497	FQ312003_intergenic_63464_63497	FQ312003_intergenic_63464_63497	0	2	0	0	0	0	1	0	0	26	24
FQ312003_intergenic_636367_636465	FQ312003_intergenic_636367_636465	FQ312003_intergenic_636367_636465	0	1	0	0	0	0	0	0	0	23	34
FQ312003_intergenic_638266_638453	FQ312003_intergenic_638266_638453	FQ312003_intergenic_638266_638453	0	0	0	0	0	0	0	0	1	357	777
FQ312003_intergenic_643352_643439	FQ312003_intergenic_643352_643439	FQ312003_intergenic_643352_643439	2	0	0	0	0	0	0	0	0	3	4
FQ312003_intergenic_648885_649033	FQ312003_intergenic_648885_649033	FQ312003_intergenic_648885_649033	0	0	0	0	0	0	0	1	1	15	9
FQ312003_intergenic_655485_655692	FQ312003_intergenic_655485_655692	FQ312003_intergenic_655485_655692	7	0	0	0	1	0	2	1	3	11	5
FQ312003_intergenic_660631_660711	FQ312003_intergenic_660631_660711	FQ312003_intergenic_660631_660711	0	0	0	0	0	0	0	0	3	7	11
FQ312003_intergenic_664303_664328	FQ312003_intergenic_664303_664328	FQ312003_intergenic_664303_664328	0	1	0	0	0	0	0	0	0	14	4
FQ312003_intergenic_667416_667480	FQ312003_intergenic_667416_667480	FQ312003_intergenic_667416_667480	0	0	0	0	0	0	0	0	0	82	124
FQ312003_intergenic_668484_668699	FQ312003_intergenic_668484_668699	FQ312003_intergenic_668484_668699	0	0	1	2	0	0	2	0	0	193	113
FQ312003_intergenic_66944_67001	FQ312003_intergenic_66944_67001	FQ312003_intergenic_66944_67001	0	0	0	0	0	0	0	0	1	3	4
FQ312003_intergenic_669547_669886	FQ312003_intergenic_669547_669886	FQ312003_intergenic_669547_669886	2	5	3	15	6	10	0	2	21	2308	4723
FQ312003_intergenic_670551_670691	FQ312003_intergenic_670551_670691	FQ312003_intergenic_670551_670691	1	0	1	3	4	1	0	0	3	347	2723
FQ312003_intergenic_672358_672588	FQ312003_intergenic_672358_672588	FQ312003_intergenic_672358_672588	0	0	0	2	1	0	1	0	0	9	40
FQ312003_intergenic_677339_677460	FQ312003_intergenic_677339_677460	FQ312003_intergenic_677339_677460	2	0	0	0	1	1	0	1	1	116	80
FQ312003_intergenic_679293_679426	FQ312003_intergenic_679293_679426	FQ312003_intergenic_679293_679426	1	0	0	2	3	0	0	0	9	37	33
FQ312003_intergenic_68443_68586	FQ312003_intergenic_68443_68586	FQ312003_intergenic_68443_68586	2	0	0	0	0	0	0	0	0	13	5
FQ312003_intergenic_687181_687464	FQ312003_intergenic_687181_687464	FQ312003_intergenic_687181_687464	0	0	0	0	0	0	4	0	0	53	24
FQ312003_intergenic_691183_691592	FQ312003_intergenic_691183_691592	FQ312003_intergenic_691183_691592	2	2	0	0	0	0	2	0	3	107	38
FQ312003_intergenic_692266_692349	FQ312003_intergenic_692266_692349	FQ312003_intergenic_692266_692349	3	2	0	2	3	3	0	1	6	633	278
FQ312003_intergenic_693983_694010	FQ312003_intergenic_693983_694010	FQ312003_intergenic_693983_694010	0	0	0	0	0	0	1	2	1	127	129
FQ312003_intergenic_695366_695470	FQ312003_intergenic_695366_695470	FQ312003_intergenic_695366_695470	0	0	0	1	1	0	1	0	1	262	304
FQ312003_intergenic_696525_696725	FQ312003_intergenic_696525_696725	FQ312003_intergenic_696525_696725	1	3	0	0	0	0	0	0	2	873	546
FQ312003_intergenic_699151_699189	FQ312003_intergenic_699151_699189	FQ312003_intergenic_699151_699189	0	0	0	0	0	0	0	0	0	46	70
FQ312003_intergenic_704204_704431	FQ312003_intergenic_704204_704431	FQ312003_intergenic_704204_704431	2	0	1	4	0	4	1	2	5	752	665
FQ312003_intergenic_711168_711354	FQ312003_intergenic_711168_711354	FQ312003_intergenic_711168_711354	0	0	0	0	0	1	0	1	1	66	55
FQ312003_intergenic_717534_717557	FQ312003_intergenic_717534_717557	FQ312003_intergenic_717534_717557	1	0	0	0	0	1	1	0	0	13	6
FQ312003_intergenic_725955_725970	FQ312003_intergenic_725955_725970	FQ312003_intergenic_725955_725970	4	1	0	0	0	0	0	0	0	5	4
FQ312003_intergenic_728211_728269	FQ312003_intergenic_728211_728269	FQ312003_intergenic_728211_728269	1	0	0	0	0	2	0	2	9	74	61
FQ312003_intergenic_729297_729532	FQ312003_intergenic_729297_729532	FQ312003_intergenic_729297_729532	0	1	0	0	0	0	2	0	6	486	216
FQ312003_intergenic_732070_732126	FQ312003_intergenic_732070_732126	FQ312003_intergenic_732070_732126	0	0	0	2	0	0	0	0	0	378	516
FQ312003_intergenic_733783_733847	FQ312003_intergenic_733783_733847	FQ312003_intergenic_733783_733847	0	0	0	1	1	0	0	1	1	73	86
FQ312003_intergenic_735373_735415	FQ312003_intergenic_735373_735415	FQ312003_intergenic_735373_735415	1	2	0	2	0	1	0	0	3	40	18
FQ312003_intergenic_737334_738299	FQ312003_intergenic_737334_738299	FQ312003_intergenic_737334_738299	12	4	0	3	4	8	100	14	25	3474	3357
FQ312003_intergenic_73891_73969	FQ312003_intergenic_73891_73969	FQ312003_intergenic_73891_73969	1	0	0	0	0	0	0	0	0	34	19
FQ312003_intergenic_740065_740253	FQ312003_intergenic_740065_740253	FQ312003_intergenic_740065_740253	6	1	0	3	0	0	0	0	1	192	196
FQ312003_intergenic_744393_744618	FQ312003_intergenic_744393_744618	FQ312003_intergenic_744393_744618	1	2	4	0	0	0	0	1	0	266	230
FQ312003_intergenic_7447_7614	FQ312003_intergenic_7447_7614	FQ312003_intergenic_7447_7614	2	1	2	3	0	0	1	0	2	458	426
FQ312003_intergenic_746672_746781	FQ312003_intergenic_746672_746781	FQ312003_intergenic_746672_746781	0	1	0	0	1	0	0	0	0	129	128
FQ312003_intergenic_748550_748894	FQ312003_intergenic_748550_748894	FQ312003_intergenic_748550_748894	1	2	0	0	2	2	0	6	1	191	117
FQ312003_intergenic_74892_75040	FQ312003_intergenic_74892_75040	FQ312003_intergenic_74892_75040	4	2	0	0	0	0	0	0	2	54	48
FQ312003_intergenic_75489_75832	FQ312003_intergenic_75489_75832	FQ312003_intergenic_75489_75832	4	2	0	0	0	0	1	0	2	53	89
FQ312003_intergenic_755741_755754	FQ312003_intergenic_755741_755754	FQ312003_intergenic_755741_755754	0	0	0	0	0	0	0	0	2	16	29
FQ312003_intergenic_756308_756488	FQ312003_intergenic_756308_756488	FQ312003_intergenic_756308_756488	0	0	1	6	2	1	0	2	3	4736	5305
FQ312003_intergenic_757120_757181	FQ312003_intergenic_757120_757181	FQ312003_intergenic_757120_757181	0	4	1	0	0	0	0	0	0	328	374
FQ312003_intergenic_757564_757596	FQ312003_intergenic_757564_757596	FQ312003_intergenic_757564_757596	1	1	0	0	1	0	0	0	0	50	54
FQ312003_intergenic_758468_758551	FQ312003_intergenic_758468_758551	FQ312003_intergenic_758468_758551	0	2	0	0	0	2	0	0	0	851	477
FQ312003_intergenic_760860_760873	FQ312003_intergenic_760860_760873	FQ312003_intergenic_760860_760873	1	0	0	1	0	0	0	0	0	1	0
FQ312003_intergenic_765039_765699	FQ312003_intergenic_765039_765699	FQ312003_intergenic_765039_765699	4	2	0	4	0	0	4	6	9	6868	6151
FQ312003_intergenic_773497_773821	FQ312003_intergenic_773497_773821	FQ312003_intergenic_773497_773821	2	2	0	4	0	0	2	2	8	628	530
FQ312003_intergenic_777181_777408	FQ312003_intergenic_777181_777408	FQ312003_intergenic_777181_777408	4	0	0	0	2	0	0	0	2	128	108
FQ312003_intergenic_780575_780797	FQ312003_intergenic_780575_780797	FQ312003_intergenic_780575_780797	0	2	0	0	3	0	0	1	3	317	228
FQ312003_intergenic_781656_782014	FQ312003_intergenic_781656_782014	FQ312003_intergenic_781656_782014	0	1	0	0	0	2	0	0	8	232	189
FQ312003_intergenic_783193_783377	FQ312003_intergenic_783193_783377	FQ312003_intergenic_783193_783377	4	1	0	0	2	0	0	0	0	16	8
FQ312003_intergenic_786669_786696	FQ312003_intergenic_786669_786696	FQ312003_intergenic_786669_786696	0	0	0	0	0	0	0	0	0	9	3
FQ312003_intergenic_790154_790245	FQ312003_intergenic_790154_790245	FQ312003_intergenic_790154_790245	1	0	0	0	0	0	0	0	0	13	4
FQ312003_intergenic_795195_795314	FQ312003_intergenic_795195_795314	FQ312003_intergenic_795195_795314	0	0	0	1	0	1	0	0	7	142	303
FQ312003_intergenic_797045_797352	FQ312003_intergenic_797045_797352	FQ312003_intergenic_797045_797352	4	0	0	1	2	1	3	11	11	4117	4650
FQ312003_intergenic_800683_801105	FQ312003_intergenic_800683_801105	FQ312003_intergenic_800683_801105	8	4	0	1	0	5	5	8	17	2855	1982
FQ312003_intergenic_80328_80500	FQ312003_intergenic_80328_80500	FQ312003_intergenic_80328_80500	6	0	0	4	0	2	0	2	1	667	260
FQ312003_intergenic_805231_805271	FQ312003_intergenic_805231_805271	FQ312003_intergenic_805231_805271	3	0	4	3	0	4	0	5	9	141	144
FQ312003_intergenic_807408_808889	FQ312003_intergenic_807408_808889	FQ312003_intergenic_807408_808889	10	10	4	6	3	20	0	15	23	8100	5663
FQ312003_intergenic_811842_811877	FQ312003_intergenic_811842_811877	FQ312003_intergenic_811842_811877	0	0	0	0	0	0	0	1	1	7	7
FQ312003_intergenic_812260_812387	FQ312003_intergenic_812260_812387	FQ312003_intergenic_812260_812387	2	0	0	2	2	0	0	1	5	294	192
FQ312003_intergenic_815302_815324	FQ312003_intergenic_815302_815324	FQ312003_intergenic_815302_815324	1	1	0	2	0	3	0	0	3	53	44
FQ312003_intergenic_818075_819438	FQ312003_intergenic_818075_819438	FQ312003_intergenic_818075_819438	12	1	7	11	11	11	160	16	54	5567	3989
FQ312003_intergenic_822759_822977	FQ312003_intergenic_822759_822977	FQ312003_intergenic_822759_822977	6	0	0	0	0	0	0	0	3	1145	1069
FQ312003_intergenic_825630_825658	FQ312003_intergenic_825630_825658	FQ312003_intergenic_825630_825658	0	0	0	0	0	0	1	0	0	53	25
FQ312003_intergenic_827634_827755	FQ312003_intergenic_827634_827755	FQ312003_intergenic_827634_827755	0	2	0	0	1	0	2	0	0	46	18
FQ312003_intergenic_832525_832542	FQ312003_intergenic_832525_832542	FQ312003_intergenic_832525_832542	2	0	0	0	0	0	0	0	1	2	3
FQ312003_intergenic_833342_833620	FQ312003_intergenic_833342_833620	FQ312003_intergenic_833342_833620	9	2	0	0	0	0	0	0	1	26	46
FQ312003_intergenic_836420_836542	FQ312003_intergenic_836420_836542	FQ312003_intergenic_836420_836542	0	0	0	0	2	0	0	1	0	37	37
FQ312003_intergenic_840902_841023	FQ312003_intergenic_840902_841023	FQ312003_intergenic_840902_841023	4	2	0	0	0	0	2	0	0	9	17
FQ312003_intergenic_842033_842102	FQ312003_intergenic_842033_842102	FQ312003_intergenic_842033_842102	0	0	0	0	0	0	0	0	0	3	2
FQ312003_intergenic_844813_844878	FQ312003_intergenic_844813_844878	FQ312003_intergenic_844813_844878	0	2	0	0	0	0	1	0	4	141	142
FQ312003_intergenic_848322_848384	FQ312003_intergenic_848322_848384	FQ312003_intergenic_848322_848384	0	1	0	0	1	0	0	0	1	227	151
FQ312003_intergenic_849481_849523	FQ312003_intergenic_849481_849523	FQ312003_intergenic_849481_849523	0	0	0	0	1	0	0	1	1	24	21
FQ312003_intergenic_850908_851044	FQ312003_intergenic_850908_851044	FQ312003_intergenic_850908_851044	0	1	0	0	2	0	3	0	0	200	158
FQ312003_intergenic_854077_854172	FQ312003_intergenic_854077_854172	FQ312003_intergenic_854077_854172	0	2	0	1	1	0	1	0	0	11	5
FQ312003_intergenic_863088_863637	FQ312003_intergenic_863088_863637	FQ312003_intergenic_863088_863637	1	0	0	0	0	0	0	0	2	633	367
FQ312003_intergenic_865760_866148	FQ312003_intergenic_865760_866148	FQ312003_intergenic_865760_866148	2	1	0	0	0	2	4	4	0	218	158
FQ312003_intergenic_869547_869842	FQ312003_intergenic_869547_869842	FQ312003_intergenic_869547_869842	3	2	0	2	0	2	1	1	11	594	500
FQ312003_intergenic_873399_873444	FQ312003_intergenic_873399_873444	FQ312003_intergenic_873399_873444	1	1	0	0	0	0	2	0	0	9	6
FQ312003_intergenic_878414_878445	FQ312003_intergenic_878414_878445	FQ312003_intergenic_878414_878445	1	0	0	0	0	0	0	1	0	34	15
FQ312003_intergenic_880025_880039	FQ312003_intergenic_880025_880039	FQ312003_intergenic_880025_880039	2	0	0	0	0	0	0	0	0	13	16
FQ312003_intergenic_88257_88636	FQ312003_intergenic_88257_88636	FQ312003_intergenic_88257_88636	5	1	0	0	0	1	0	0	2	7	6
FQ312003_intergenic_884662_884790	FQ312003_intergenic_884662_884790	FQ312003_intergenic_884662_884790	0	0	0	0	0	0	0	2	2	27	28
FQ312003_intergenic_886256_886461	FQ312003_intergenic_886256_886461	FQ312003_intergenic_886256_886461	3	4	0	1	0	2	0	0	0	16	25
FQ312003_intergenic_889612_889666	FQ312003_intergenic_889612_889666	FQ312003_intergenic_889612_889666	4	0	0	0	0	3	0	0	4	46	74
FQ312003_intergenic_890028_890211	FQ312003_intergenic_890028_890211	FQ312003_intergenic_890028_890211	5	0	0	0	1	0	2	0	2	692	453
FQ312003_intergenic_890579_890682	FQ312003_intergenic_890579_890682	FQ312003_intergenic_890579_890682	0	0	0	0	0	0	0	0	0	338	330
FQ312003_intergenic_893935_893952	FQ312003_intergenic_893935_893952	FQ312003_intergenic_893935_893952	0	0	0	0	0	0	2	0	3	21	25
FQ312003_intergenic_895432_895474	FQ312003_intergenic_895432_895474	FQ312003_intergenic_895432_895474	0	2	2	2	0	0	2	0	3	42	85
FQ312003_intergenic_896322_896697	FQ312003_intergenic_896322_896697	FQ312003_intergenic_896322_896697	4	0	7	17	7	9	1	2	14	883	1415
FQ312003_intergenic_897302_897503	FQ312003_intergenic_897302_897503	FQ312003_intergenic_897302_897503	0	0	0	0	0	0	0	0	2	503	334
FQ312003_intergenic_898492_898744	FQ312003_intergenic_898492_898744	FQ312003_intergenic_898492_898744	4	0	8	12	2	10	0	9	15	1399	883
FQ312003_intergenic_901004_901481	FQ312003_intergenic_901004_901481	FQ312003_intergenic_901004_901481	0	6	0	2	2	4	0	4	10	1160	1182
FQ312003_intergenic_904129_904246	FQ312003_intergenic_904129_904246	FQ312003_intergenic_904129_904246	4	0	0	0	0	1	0	0	2	236	88
FQ312003_intergenic_905940_906447	FQ312003_intergenic_905940_906447	FQ312003_intergenic_905940_906447	9	6	0	0	0	0	0	6	3	365	277
FQ312003_intergenic_907851_908143	FQ312003_intergenic_907851_908143	FQ312003_intergenic_907851_908143	2	0	2	0	1	2	0	2	4	421	347
FQ312003_intergenic_909510_909670	FQ312003_intergenic_909510_909670	FQ312003_intergenic_909510_909670	6	0	0	0	1	0	4	0	0	25	21
FQ312003_intergenic_913996_914172	FQ312003_intergenic_913996_914172	FQ312003_intergenic_913996_914172	4	0	0	0	0	0	0	0	0	22	16
FQ312003_intergenic_916264_916359	FQ312003_intergenic_916264_916359	FQ312003_intergenic_916264_916359	0	3	0	0	0	1	0	0	0	179	79
FQ312003_intergenic_92085_92130	FQ312003_intergenic_92085_92130	FQ312003_intergenic_92085_92130	3	0	0	0	0	0	0	0	0	2	1
FQ312003_intergenic_924166_924295	FQ312003_intergenic_924166_924295	FQ312003_intergenic_924166_924295	5	0	0	0	0	0	0	0	0	116	66
FQ312003_intergenic_924780_925391	FQ312003_intergenic_924780_925391	FQ312003_intergenic_924780_925391	8	5	0	6	2	1	0	5	4	3395	1085
FQ312003_intergenic_927738_927930	FQ312003_intergenic_927738_927930	FQ312003_intergenic_927738_927930	4	0	0	2	1	1	1	4	6	77	133
FQ312003_intergenic_929195_929542	FQ312003_intergenic_929195_929542	FQ312003_intergenic_929195_929542	0	0	2	3	2	2	0	2	6	142	177
FQ312003_intergenic_932225_932388	FQ312003_intergenic_932225_932388	FQ312003_intergenic_932225_932388	2	2	0	3	0	4	0	1	19	758	808
FQ312003_intergenic_932915_933160	FQ312003_intergenic_932915_933160	FQ312003_intergenic_932915_933160	0	1	0	0	0	0	3	4	3	514	614
FQ312003_intergenic_934565_934707	FQ312003_intergenic_934565_934707	FQ312003_intergenic_934565_934707	0	0	0	1	1	0	0	0	0	64	35
FQ312003_intergenic_937494_937705	FQ312003_intergenic_937494_937705	FQ312003_intergenic_937494_937705	4	0	0	0	2	0	1	0	1	324	220
FQ312003_intergenic_93891_94083	FQ312003_intergenic_93891_94083	FQ312003_intergenic_93891_94083	3	1	0	0	2	0	0	0	1	62	28
FQ312003_intergenic_941116_941182	FQ312003_intergenic_941116_941182	FQ312003_intergenic_941116_941182	3	0	0	0	0	0	0	2	1	26	18
FQ312003_intergenic_941904_941919	FQ312003_intergenic_941904_941919	FQ312003_intergenic_941904_941919	0	0	0	0	0	0	0	0	0	34	98
FQ312003_intergenic_943706_943875	FQ312003_intergenic_943706_943875	FQ312003_intergenic_943706_943875	5	0	0	0	0	2	0	0	1	629	344
FQ312003_intergenic_944649_944717	FQ312003_intergenic_944649_944717	FQ312003_intergenic_944649_944717	1	0	0	0	0	0	0	0	2	72	173
FQ312003_intergenic_94601_94723	FQ312003_intergenic_94601_94723	FQ312003_intergenic_94601_94723	6	1	2	9	5	8	0	6	23	194	194
FQ312003_intergenic_947347_947594	FQ312003_intergenic_947347_947594	FQ312003_intergenic_947347_947594	2	3	0	0	0	0	0	0	1	296	191
FQ312003_intergenic_95277_95911	FQ312003_intergenic_95277_95911	FQ312003_intergenic_95277_95911	2	2	2	4	8	3	1	13	16	203	131
FQ312003_intergenic_953554_953735	FQ312003_intergenic_953554_953735	FQ312003_intergenic_953554_953735	1	0	0	2	0	0	0	0	1	10	10
FQ312003_intergenic_957027_957144	FQ312003_intergenic_957027_957144	FQ312003_intergenic_957027_957144	4	0	0	2	0	0	0	0	4	250	158
FQ312003_intergenic_957977_958112	FQ312003_intergenic_957977_958112	FQ312003_intergenic_957977_958112	4	1	0	0	0	0	0	0	0	35	59
FQ312003_intergenic_961082_961210	FQ312003_intergenic_961082_961210	FQ312003_intergenic_961082_961210	2	0	0	0	1	0	1	0	1	164	98
FQ312003_intergenic_961827_961853	FQ312003_intergenic_961827_961853	FQ312003_intergenic_961827_961853	0	1	2	5	3	2	0	7	11	349	292
FQ312003_intergenic_968413_968469	FQ312003_intergenic_968413_968469	FQ312003_intergenic_968413_968469	2	0	0	0	0	0	0	0	1	12	15
FQ312003_intergenic_971203_971245	FQ312003_intergenic_971203_971245	FQ312003_intergenic_971203_971245	1	0	0	0	0	0	0	0	0	6	36
FQ312003_intergenic_972138_972346	FQ312003_intergenic_972138_972346	FQ312003_intergenic_972138_972346	0	2	0	1	0	0	2	0	0	319	156
FQ312003_intergenic_975071_975097	FQ312003_intergenic_975071_975097	FQ312003_intergenic_975071_975097	2	1	2	3	2	2	0	0	4	330	204
FQ312003_intergenic_978260_978288	FQ312003_intergenic_978260_978288	FQ312003_intergenic_978260_978288	0	0	2	2	0	0	0	0	1	32	29
FQ312003_intergenic_978611_978833	FQ312003_intergenic_978611_978833	FQ312003_intergenic_978611_978833	2	4	4	9	5	15	0	8	16	4109	3252
FQ312003_intergenic_97902_98005	FQ312003_intergenic_97902_98005	FQ312003_intergenic_97902_98005	3	3	0	2	0	0	0	0	0	23	53
FQ312003_intergenic_981562_981652	FQ312003_intergenic_981562_981652	FQ312003_intergenic_981562_981652	0	0	0	0	2	0	0	0	0	6	13
FQ312003_intergenic_98172_98207	FQ312003_intergenic_98172_98207	FQ312003_intergenic_98172_98207	0	0	0	0	0	0	0	0	1	18	16
FQ312003_intergenic_982212_982573	FQ312003_intergenic_982212_982573	FQ312003_intergenic_982212_982573	13	0	0	2	2	0	28	1	5	21	26
FQ312003_intergenic_983358_983427	FQ312003_intergenic_983358_983427	FQ312003_intergenic_983358_983427	0	0	0	0	0	0	1	3	1	104	123
FQ312003_intergenic_983930_984165	FQ312003_intergenic_983930_984165	FQ312003_intergenic_983930_984165	2	2	0	4	2	0	0	2	11	50	21
FQ312003_intergenic_991702_991714	FQ312003_intergenic_991702_991714	FQ312003_intergenic_991702_991714	0	0	0	0	0	0	0	0	1	14	9
FQ312003_intergenic_992784_993228	FQ312003_intergenic_992784_993228	FQ312003_intergenic_992784_993228	4	3	2	6	2	4	0	11	13	1478	1178
FQ312003_intergenic_993824_993857	FQ312003_intergenic_993824_993857	FQ312003_intergenic_993824_993857	0	0	0	0	1	1	1	2	2	61	97
FQ312003_intergenic_998044_998082	FQ312003_intergenic_998044_998082	FQ312003_intergenic_998044_998082	1	0	2	1	0	0	0	0	0	56	44
FQ312003_intergenic_9993_10041	FQ312003_intergenic_9993_10041	FQ312003_intergenic_9993_10041	5	1	0	0	0	3	1	0	2	30	28
pSLP2.25	pSLP2.25	pSLP2.25	0	1	0	0	0	3	1	2	1	193	327
pSLP2.27	pSLP2.27	pSLP2.27	3	0	0	0	0	2	0	0	0	147	172
pSLP2.42	pSLP2.42	pSLP2.42	11	1	0	0	0	0	2	0	0	18	18
pSLP2.55	pSLP2.55	pSLP2.55	15	0	0	0	0	0	2	0	0	2	1
pSLP2_intergenic_1_327	pSLP2_intergenic_1_327	pSLP2_intergenic_1_327	8	31	12	29	32	28	2	80	110	4744	4745
pSLP2_intergenic_10590_10607	pSLP2_intergenic_10590_10607	pSLP2_intergenic_10590_10607	0	0	0	0	0	0	1	0	0	31	12
pSLP2_intergenic_11810_12349	pSLP2_intergenic_11810_12349	pSLP2_intergenic_11810_12349	5	2	0	4	0	0	3	0	2	393	263
pSLP2_intergenic_13690_13842	pSLP2_intergenic_13690_13842	pSLP2_intergenic_13690_13842	9	3	0	2	0	1	0	0	2	183	238
pSLP2_intergenic_14147_14172	pSLP2_intergenic_14147_14172	pSLP2_intergenic_14147_14172	0	0	0	0	0	0	0	0	1	31	51
pSLP2_intergenic_15280_15417	pSLP2_intergenic_15280_15417	pSLP2_intergenic_15280_15417	1	0	0	0	0	0	0	0	0	439	230
pSLP2_intergenic_1537_2344	pSLP2_intergenic_1537_2344	pSLP2_intergenic_1537_2344	18	6	0	0	0	0	10	0	1	152	70
pSLP2_intergenic_16889_16928	pSLP2_intergenic_16889_16928	pSLP2_intergenic_16889_16928	1	0	0	0	0	0	0	0	1	68	96
pSLP2_intergenic_17152_17185	pSLP2_intergenic_17152_17185	pSLP2_intergenic_17152_17185	1	0	0	0	0	0	0	0	0	39	61
pSLP2_intergenic_22344_22555	pSLP2_intergenic_22344_22555	pSLP2_intergenic_22344_22555	19	3	0	0	0	0	2	0	0	11	9
pSLP2_intergenic_22949_23199	pSLP2_intergenic_22949_23199	pSLP2_intergenic_22949_23199	9	2	0	0	0	0	0	0	0	2	0
pSLP2_intergenic_23828_24070	pSLP2_intergenic_23828_24070	pSLP2_intergenic_23828_24070	8	4	0	2	0	4	19	2	8	285	310
pSLP2_intergenic_28897_29524	pSLP2_intergenic_28897_29524	pSLP2_intergenic_28897_29524	29	0	0	0	0	0	5	0	0	37	22
pSLP2_intergenic_31411_31956	pSLP2_intergenic_31411_31956	pSLP2_intergenic_31411_31956	11	6	0	0	0	5	7	6	6	197	201
pSLP2_intergenic_32393_32416	pSLP2_intergenic_32393_32416	pSLP2_intergenic_32393_32416	1	0	0	0	0	0	3	0	0	2	1
pSLP2_intergenic_33787_33918	pSLP2_intergenic_33787_33918	pSLP2_intergenic_33787_33918	0	0	0	0	0	0	2	0	2	806	473
pSLP2_intergenic_3881_3920	pSLP2_intergenic_3881_3920	pSLP2_intergenic_3881_3920	0	0	0	0	0	1	0	0	2	112	188
pSLP2_intergenic_41680_41731	pSLP2_intergenic_41680_41731	pSLP2_intergenic_41680_41731	0	1	0	0	0	0	1	2	0	78	46
pSLP2_intergenic_42124_42645	pSLP2_intergenic_42124_42645	pSLP2_intergenic_42124_42645	4	2	8	10	6	4	2	20	53	1513	1167
pSLP2_intergenic_43043_43855	pSLP2_intergenic_43043_43855	pSLP2_intergenic_43043_43855	14	5	0	4	0	10	0	10	22	2462	1605
pSLP2_intergenic_4471_4504	pSLP2_intergenic_4471_4504	pSLP2_intergenic_4471_4504	1	0	0	0	0	0	0	0	2	127	113
pSLP2_intergenic_6366_6618	pSLP2_intergenic_6366_6618	pSLP2_intergenic_6366_6618	3	1	0	0	0	0	0	0	0	644	249
pSLP2_intergenic_65663_65956	pSLP2_intergenic_65663_65956	pSLP2_intergenic_65663_65956	1	1	0	0	0	0	0	0	4	1253	992
pSLP2_intergenic_68813_68862	pSLP2_intergenic_68813_68862	pSLP2_intergenic_68813_68862	1	1	0	0	0	0	0	0	0	22	11
pSLP2_intergenic_8066_8243	pSLP2_intergenic_8066_8243	pSLP2_intergenic_8066_8243	2	0	0	0	0	2	0	0	1	31	30
pSLP2_intergenic_83213_83379	pSLP2_intergenic_83213_83379	pSLP2_intergenic_83213_83379	6	0	1	4	0	2	1	0	13	651	574
pSLP2_intergenic_84744_84896	pSLP2_intergenic_84744_84896	pSLP2_intergenic_84744_84896	3	0	0	0	0	2	0	0	6	12	17
pSLP2_intergenic_85531_85871	pSLP2_intergenic_85531_85871	pSLP2_intergenic_85531_85871	2	0	0	0	0	0	0	3	1	151	100
pSLP3_intergenic_4770_5615	pSLP3_intergenic_4770_5615	pSLP3_intergenic_4770_5615	228	30	2	12	0	10	199	11	18	1112	1304
pSLP3_intergenic_5998_6453	pSLP3_intergenic_5998_6453	pSLP3_intergenic_5998_6453	104	14	6	2	2	6	34	5	5	1124	912
pSLT1344.61	pSLT1344.61	pSLT1344.61	14	6	0	0	2	0	4	0	0	50	39
pSLT1344.90	pSLT1344.90	pSLT1344.90	27	0	1	2	4	4	8	0	7	41	253
pSLT1344_intergenic_16259_16371	pSLT1344_intergenic_16259_16371	pSLT1344_intergenic_16259_16371	2	4	0	2	0	0	0	0	0	103	59
pSLT1344_intergenic_19286_19637	pSLT1344_intergenic_19286_19637	pSLT1344_intergenic_19286_19637	10	2	0	0	2	3	2	2	9	59	43
pSLT1344_intergenic_25316_25610	pSLT1344_intergenic_25316_25610	pSLT1344_intergenic_25316_25610	5	0	0	1	0	0	1	0	1	37	42
pSLT1344_intergenic_26393_26426	pSLT1344_intergenic_26393_26426	pSLT1344_intergenic_26393_26426	1	0	0	0	0	0	5	1	4	8	4
pSLT1344_intergenic_32322_32413	pSLT1344_intergenic_32322_32413	pSLT1344_intergenic_32322_32413	0	0	0	0	0	0	0	0	0	32	23
pSLT1344_intergenic_32895_33208	pSLT1344_intergenic_32895_33208	pSLT1344_intergenic_32895_33208	9	6	0	0	0	1	2	0	5	33	22
pSLT1344_intergenic_33780_35317	pSLT1344_intergenic_33780_35317	pSLT1344_intergenic_33780_35317	22	12	0	2	1	2	11	4	0	1027	610
pSLT1344_intergenic_39508_40107	pSLT1344_intergenic_39508_40107	pSLT1344_intergenic_39508_40107	51	2	0	4	0	8	3	2	6	42	34
pSLT1344_intergenic_40532_40666	pSLT1344_intergenic_40532_40666	pSLT1344_intergenic_40532_40666	11	1	0	0	0	0	2	0	0	7	7
pSLT1344_intergenic_44405_44685	pSLT1344_intergenic_44405_44685	pSLT1344_intergenic_44405_44685	19	1	0	0	0	0	7	0	0	4	7
pSLT1344_intergenic_45606_46015	pSLT1344_intergenic_45606_46015	pSLT1344_intergenic_45606_46015	20	4	0	2	1	0	0	0	6	39	75
pSLT1344_intergenic_50074_50387	pSLT1344_intergenic_50074_50387	pSLT1344_intergenic_50074_50387	2	5	0	0	0	0	0	0	4	338	274
pSLT1344_intergenic_51430_52502	pSLT1344_intergenic_51430_52502	pSLT1344_intergenic_51430_52502	30	9	2	10	8	12	5	2	29	544	580
pSLT1344_intergenic_54221_54378	pSLT1344_intergenic_54221_54378	pSLT1344_intergenic_54221_54378	7	6	0	0	1	0	1	0	4	12	14
pSLT1344_intergenic_54968_55521	pSLT1344_intergenic_54968_55521	pSLT1344_intergenic_54968_55521	16	1	0	2	2	2	4	2	10	513	1662
pSLT1344_intergenic_56363_56468	pSLT1344_intergenic_56363_56468	pSLT1344_intergenic_56363_56468	2	3	8	24	11	15	2	17	23	583	652
pSLT1344_intergenic_59736_59823	pSLT1344_intergenic_59736_59823	pSLT1344_intergenic_59736_59823	3	3	0	3	2	0	4	7	9	111	159
pSLT1344_intergenic_60920_61469	pSLT1344_intergenic_60920_61469	pSLT1344_intergenic_60920_61469	5	4	0	2	2	2	2	1	7	726	535
pSLT1344_intergenic_62464_62874	pSLT1344_intergenic_62464_62874	pSLT1344_intergenic_62464_62874	18	2	4	14	9	13	3	13	25	274	187
pSLT1344_intergenic_63743_63823	pSLT1344_intergenic_63743_63823	pSLT1344_intergenic_63743_63823	2	5	4	5	5	17	2	11	13	43	25
pSLT1344_intergenic_65700_65996	pSLT1344_intergenic_65700_65996	pSLT1344_intergenic_65700_65996	6	6	16	43	11	40	2	37	78	119	62
pSLT1344_intergenic_66706_66865	pSLT1344_intergenic_66706_66865	pSLT1344_intergenic_66706_66865	2	1	0	8	3	8	2	2	12	189	69
pSLT1344_intergenic_67617_67642	pSLT1344_intergenic_67617_67642	pSLT1344_intergenic_67617_67642	1	1	2	0	1	3	0	2	3	56	27
pSLT1344_intergenic_68007_68123	pSLT1344_intergenic_68007_68123	pSLT1344_intergenic_68007_68123	0	0	0	0	1	1	2	0	0	263	93
pSLT1344_intergenic_69738_69829	pSLT1344_intergenic_69738_69829	pSLT1344_intergenic_69738_69829	15	0	1	2	2	0	8	0	4	31	47
pSLT1344_intergenic_70416_70983	pSLT1344_intergenic_70416_70983	pSLT1344_intergenic_70416_70983	39	0	2	0	2	0	8	2	9	71	110
pSLT1344_intergenic_73797_74371	pSLT1344_intergenic_73797_74371	pSLT1344_intergenic_73797_74371	3	9	1	2	4	0	2	0	3	1376	1128
pSLT1344_intergenic_74994_75376	pSLT1344_intergenic_74994_75376	pSLT1344_intergenic_74994_75376	7	2	0	1	0	0	2	2	3	535	573
pSLT1344_intergenic_75774_76166	pSLT1344_intergenic_75774_76166	pSLT1344_intergenic_75774_76166	5	3	2	1	2	1	1	5	12	2426	1719
pSLT1344_intergenic_77257_78027	pSLT1344_intergenic_77257_78027	pSLT1344_intergenic_77257_78027	25	6	0	3	2	3	11	0	5	693	887
pSLT1344_intergenic_78338_79127	pSLT1344_intergenic_78338_79127	pSLT1344_intergenic_78338_79127	7	8	0	2	0	0	2	0	4	268	107
pSLT1344_intergenic_79531_79704	pSLT1344_intergenic_79531_79704	pSLT1344_intergenic_79531_79704	5	0	0	0	0	0	0	0	2	132	82
pSLT1344_intergenic_80324_80561	pSLT1344_intergenic_80324_80561	pSLT1344_intergenic_80324_80561	3	3	0	0	0	0	2	0	2	24	38
pSLT1344_intergenic_84217_84368	pSLT1344_intergenic_84217_84368	pSLT1344_intergenic_84217_84368	4	1	1	0	0	1	0	4	2	348	361
pSLT1344_intergenic_85345_85675	pSLT1344_intergenic_85345_85675	pSLT1344_intergenic_85345_85675	0	0	0	0	0	2	2	2	11	3641	4798
pSLT1344_intergenic_86324_86467	pSLT1344_intergenic_86324_86467	pSLT1344_intergenic_86324_86467	4	1	0	0	1	0	0	2	0	53	90
pSLT1344_intergenic_87222_87253	pSLT1344_intergenic_87222_87253	pSLT1344_intergenic_87222_87253	0	0	0	1	0	1	2	0	0	39	48
pSLT1344_intergenic_88901_89066	pSLT1344_intergenic_88901_89066	pSLT1344_intergenic_88901_89066	4	2	0	1	0	0	1	0	0	83	80
pSLT1344_intergenic_90163_91002	pSLT1344_intergenic_90163_91002	pSLT1344_intergenic_90163_91002	8	9	0	6	6	0	4	2	9	114	131
pSLT1344_intergenic_92170_92191	pSLT1344_intergenic_92170_92191	pSLT1344_intergenic_92170_92191	1	1	0	0	0	0	1	1	5	150	96
pSLT1344_intergenic_92538_92636	pSLT1344_intergenic_92538_92636	pSLT1344_intergenic_92538_92636	2	0	0	1	0	0	0	0	3	71	64
pSLT1344_intergenic_93181_93413	pSLT1344_intergenic_93181_93413	pSLT1344_intergenic_93181_93413	0	4	2	1	5	3	3	10	4	167	177
pSLT1344_intergenic_9586_9861	pSLT1344_intergenic_9586_9861	pSLT1344_intergenic_9586_9861	3	0	0	2	1	1	0	0	3	325	302
SL1344_0001	thrL	thr operon leader peptide	0	0	0	6	3	5	0	0	10	324	292
SL1344_0002	thrA	aspartokinase I/homoserine dehydrogenase I	57	20	0	2	6	15	8	14	35	1497	1637
SL1344_0003	thrB	Homoserine kinase	27	8	6	34	18	35	10	37	79	1403	1701
SL1344_0004	thrC	threonine synthase	45	13	9	31	12	33	4	74	82	638	1642
SL1344_0005	yaaA	conserved hypothetical protein	14	4	5	19	4	3	6	15	23	1511	3121
SL1344_0006	yaaJ	putative amino-acid transport protein	24	8	4	12	4	12	8	9	25	566	757
SL1344_0007	talB	transaldolase B	23	5	13	51	18	51	4	42	128	5731	8831
SL1344_0008	mog	molybdopterin biosynthesis Mog protein	10	6	0	1	2	0	4	4	3	480	845
SL1344_0009	yaaH	conserved hypothetical protein	6	3	0	2	4	2	2	2	6	445	463
SL1344_0010	SL0010	conserved hypothetical protein	9	2	2	0	0	1	7	2	1	241	215
SL1344_0011	yaaI	conserved hypothetical protein	3	0	0	0	0	0	2	3	0	243	187
SL1344_0012	dnaK	Chaperone protein dnaK	28	22	55	190	75	136	8	92	218	17811	33307
SL1344_0013	dnaJ	DnaJ protein	40	8	21	25	16	27	8	28	66	3084	3261
SL1344_0014	SL0014	putative regulatory protein	16	2	0	0	1	4	0	4	9	241	193
SL1344_0015	SL0015	predicted bacteriophage protein	8	2	0	0	1	0	2	0	0	32	21
SL1344_0016	SL0016	conserved hypothetical protein	3	2	0	1	1	0	10	0	0	64	27
SL1344_0017	SL0017	putative membrane protein	2	5	0	2	0	0	1	2	2	181	78
SL1344_0018	SL0018	putative chitinase	28	4	0	2	6	0	4	0	5	1146	1241
SL1344_0019	SL0019	putative chitinase	44	10	0	0	8	6	8	4	19	366	362
SL1344_0020	SL0020	conserved hypothetical protein	8	0	0	2	0	0	0	1	7	152	82
SL1344_0021	bcfA	fimbrial subunit	10	2	0	2	2	0	8	0	0	274	335
SL1344_0022	bcfB	fimbrial chaperone	14	2	1	5	0	0	2	2	0	236	235
SL1344_0023	bcfC	fimbrial usher protein	50	16	2	1	5	2	6	4	22	424	510
SL1344_0024	bcfD	fimbrial subunit	12	10	0	2	1	0	2	0	7	550	372
SL1344_0025	bcfE	fimbrial subunit	6	1	0	4	0	0	2	0	5	197	127
SL1344_0026	bcfF	fimbrial subunit	10	0	0	4	0	0	0	4	3	585	353
SL1344_0027	bcfG	fimbrial chaperone	12	2	0	2	2	0	2	0	5	113	142
SL1344_0028	SL0028	putative exported protein	14	4	0	0	0	0	2	6	0	79	129
SL1344_0029	SL0029	putative membrane protein	4	0	0	0	0	0	2	2	4	276	94
SL1344_0030	SL0030	putative membrane protein	3	0	0	0	0	0	0	2	0	373	80
SL1344_0031	SL0031	putative transcriptional regulator (lysR family)	4	3	0	2	0	0	6	0	8	228	175
SL1344_0032	SL0032	putative membrane protein	4	2	0	0	0	0	41	0	2	114	68
SL1344_0033	SL0033	possible sulfatase	21	0	2	0	0	2	14	2	2	1329	960
SL1344_0034	SL0034	putative secreted 5'-nucleotidase	26	6	0	0	0	2	0	2	14	654	562
SL1344_0035	SL0035	putative exported protein	7	2	0	0	0	0	8	0	3	209	100
SL1344_0036	SL0036	putative secreted sulfatase	6	8	2	2	0	0	2	4	12	487	522
SL1344_0037	SL0037	possible sulfatase regulatory protein	16	6	0	2	2	0	0	0	3	292	282
SL1344_0038	SL0038	conserved hypothetical protein	8	0	0	0	4	0	4	2	4	245	326
SL1344_0039	SL0039	possible sulfatase	25	8	0	0	0	0	6	2	6	1677	2070
SL1344_0040	nhaA	Na(+)/H(+) antiporter 1	24	4	4	4	8	4	6	8	13	1027	1112
SL1344_0041	nhaR	transcriptional activator protein NhaR	12	4	2	0	4	0	4	8	12	505	433
SL1344_0042	SL0042	putative glycosyl hydrolase	12	12	0	4	4	0	6	4	17	243	267
SL1344_0043	SL0043	putative transport protein	15	2	0	0	4	2	8	0	2	234	164
SL1344_0044	rpsT	30S ribosomal protein S20	6	1	6	6	2	20	0	36	71	4214	2634
SL1344_0045	SL0045	conserved hypothetical protein	0	0	0	0	2	2	0	2	5	1484	866
SL1344_0046	ribF	riboflavin biosynthesis protein RibF	10	0	0	4	1	6	8	13	25	894	1207
SL1344_0047	ileS	isoleucyl-tRNA synthetase	35	14	6	36	18	36	14	38	104	948	1783
SL1344_0048	lspA	lipoprotein signal peptidase	6	2	0	10	2	15	2	2	9	319	380
SL1344_0049	fkpB	probable FkbB-type 16 kD peptidyl-prolyl cis- trans isomerase	5	1	0	12	4	4	0	14	18	206	345
SL1344_0050	lytB	LytB protein	14	6	2	9	8	6	2	9	17	269	589
SL1344_0051	SL0051	conserved hypothetical protein	13	6	2	7	0	4	4	4	12	962	900
SL1344_0052	yaaF	putative nucleoside hydrolase (IUNH family)	26	1	4	2	14	6	4	4	18	570	962
SL1344_0053	citB	transcriptional regulatory protein citb	9	2	3	0	0	0	2	3	2	621	958
SL1344_0054	citA	two-component sensor kinase	17	7	0	2	4	2	11	2	19	1858	1613
SL1344_0055	SL0055	oxaloacetate decarboxylase beta chain (ec 4.1.1.3)	43	6	0	2	0	0	2	1	7	107	97
SL1344_0056	oadA2	oxaloacetate decarboxylase alpha chain	51	2	0	2	10	0	13	4	7	26	52
SL1344_0057	oadG	oxaloacetate decarboxylase gamma chain	4	0	0	0	2	0	0	0	2	15	12
SL1344_0058	citC	citrate-sodium symporter	8	6	2	2	0	0	2	0	4	177	84
SL1344_0059	citC2	[citrate (PRO-3S)-lyase] ligase	9	4	0	4	4	0	2	2	4	182	152
SL1344_0060	citD2	citrate lyase acyl carrier protein	13	0	0	0	0	0	0	0	5	18	13
SL1344_0061	citE2	citrate lyase beta chain	20	4	0	2	0	0	2	2	3	58	18
SL1344_0062	citF2	citrate lyase alpha chain	18	16	0	2	2	4	2	4	8	120	95
SL1344_0063	citX2	apo-citrate lyase phosphoribosyl-dephospho-CoA transferase	7	2	0	0	0	0	0	0	0	10	9
SL1344_0064	citG2	triphosphoribosyl-dephospho-CoA synthase	11	8	0	0	0	4	4	2	12	75	72
SL1344_0065	dapB	dihydrodipicolinate reductase	4	0	2	6	2	2	4	4	20	510	456
SL1344_0066A	SL0066A	putative viral protein (pseudogene)	1	2	0	0	2	0	2	0	0	17	12
SL1344_0067	carA	carbamoyl-phosphate synthase small chain	23	4	0	4	2	4	4	2	10	2655	5994
SL1344_0068	carB	carbamoyl-phosphate synthase large chain	84	8	2	9	6	16	8	24	33	1692	2024
SL1344_0069	caiF	transcriptional activator CaiF	0	2	4	3	0	0	0	4	13	4502	2966
SL1344_0070	caiE	carnitine operon protein CaiE	8	2	0	0	1	2	2	2	2	190	195
SL1344_0071	caiD	carnitine racemase	27	0	0	0	1	0	0	4	3	39	34
SL1344_0072	caiC	probable crotonobetaine/carnitine-CoA ligase	26	2	0	0	0	0	6	5	6	160	219
SL1344_0073	caiB	L-carnitine dehydratase	9	0	0	0	0	0	3	1	3	171	117
SL1344_0074	caiA	probable carnitine operon oxidoreductase CaiA	11	5	0	0	2	0	8	1	5	59	80
SL1344_0075	caiT	probable carnitine transporter	28	11	0	2	0	4	13	4	6	97	73
SL1344_0076	fixA	probable flavoprotein subunit	12	6	0	0	0	0	4	0	4	89	102
SL1344_0077	fixB	probable flavoprotein subunit	17	4	0	0	1	0	4	0	2	15	23
SL1344_0078	fixC	probable flavoprotein subunit	25	8	0	2	1	0	9	2	1	37	57
SL1344_0079	fixX	ferredoxin like protein FixX	9	1	0	0	0	0	2	0	1	22	30
SL1344_0080	yaaU	putative metabolite transport protein	3	6	0	2	4	0	42	2	12	606	749
SL1344_0081	SL0081	putative lipoprotein	1	1	0	2	3	0	0	0	4	397	331
SL1344_0082	SL0082	probable secreted protein	15	7	8	45	12	20	2	35	87	1035	821
SL1344_0083	SL0083	probable secreted protein	9	6	12	22	10	35	0	17	60	538	511
SL1344_0083A	SL0083A	putative membrane protein (pseudogene)	1	0	2	5	4	2	2	11	21	185	165
SL1344_0084	SL0084	putative sulfatase	21	4	2	16	5	6	6	2	16	8817	5408
SL1344_0085	SL0085	putative carnitinyl-CoA dehydratase (pseudogene)	1	2	0	0	0	0	2	0	0	34	48
SL1344_0086	yabF	putative NAD(P)H oxidoreductase	2	2	2	0	2	0	0	6	6	253	201
SL1344_0087	kefC	glutathione-regulated potassium-efflux system protein KefC	48	6	2	0	0	4	4	4	18	177	188
SL1344_0088	folA	dihydrofolate reductase type I	8	4	0	3	3	0	0	2	4	1016	678
SL1344_0089	apaH	bis(5'-nucleosyl)-tetraphosphatase	18	4	4	3	1	6	14	12	14	553	729
SL1344_0090	apaG	CorD protein	13	2	0	8	2	3	19	8	10	395	775
SL1344_0091	ksgA	dimethyladenosine transferase	24	2	6	12	6	13	57	18	25	3054	4801
SL1344_0092	pdxA	pyridoxal phosphate biosynthetic protein PdxA	30	2	0	10	9	6	0	20	25	638	923
SL1344_0093	surA	survival protein SurA precursor	17	8	6	32	8	15	0	26	71	712	1066
SL1344_0094	imp	organic solvent tolerance protein precursor	24	10	2	35	11	27	12	26	71	5346	9005
SL1344_0095	djlA	DnaJ-like protein	26	5	2	5	0	5	5	5	10	384	529
SL1344_0096	rluA	ribosomal large subunit pseudouridine synthase A	20	5	0	5	2	0	1	2	4	104	165
SL1344_0097	hepA	probable ATP-dependent helicase HepA	59	7	4	2	11	0	1	6	34	654	1337
SL1344_0098	polB	DNA polymerase II	31	14	0	4	0	3	2	6	13	1064	1992
SL1344_0099	SL0099	probable secreted protein	7	1	0	0	2	2	0	4	6	694	690
SL1344_0099A	SL0099A	putative inner membrane protein (pseudogene)	4	0	0	0	1	0	0	0	2	26	21
SL1344_0100	SL0100	hypothetical protein	10	2	0	0	0	0	2	0	6	710	435
SL1344_0101	araD	L-ribulose-5-phosphate 4-epimerase	9	2	0	0	0	0	0	0	1	74	90
SL1344_0102	araA	L-arabinose isomerase	36	2	0	0	0	2	6	0	17	131	185
SL1344_0103	araB	Ribulokinase	62	10	0	0	2	0	4	2	0	107	134
SL1344_0104	araC	arabinose operon regulatory protein	17	2	0	8	2	0	0	6	6	518	798
SL1344_0105	yabI	DedA family integral membrane protein	19	4	0	0	2	2	4	0	8	421	459
SL1344_0106	yabJ	hypothetical ABC transporter	16	0	0	2	2	2	0	4	6	50	117
SL1344_0107	yabK	putative ABC transporter integral membrane protein	34	18	0	4	1	0	8	2	4	74	192
SL1344_0108	tbpA	thiamine-binding periplasmic protein precursor	17	6	0	2	7	0	10	2	13	518	792
SL1344_0109	yabN	putative ABC transporter periplasmic solute binding protein	37	12	2	0	4	4	4	2	6	614	735
SL1344_0110	leuD	3-isopropylmalate dehydratase small subunit	14	2	0	4	0	6	6	2	7	55	69
SL1344_0111	leuC	3-isopropylmalate dehydratase large subunit	39	4	2	7	5	2	3	8	15	180	153
SL1344_0112	leuB	3-isopropylmalate dehydrogenase	18	6	2	4	6	0	2	8	14	217	177
SL1344_0113	leuA	2-isopropylmalate synthase	20	15	4	4	0	12	13	5	18	294	238
SL1344_0114	leuL	leu operon leader peptide	0	0	0	3	0	0	0	1	1	12	13
SL1344_0115	leuO	probable activator protein in leuABCD operon	10	0	0	0	2	2	6	0	0	55	33
SL1344_0116	ilvI	acetolactate synthase isozyme III large subunit	27	4	2	8	7	6	12	12	24	263	421
SL1344_0117	ilvH	acetolactate synthase isozyme III small subunit	12	5	1	6	1	1	8	4	13	155	130
SL1344_0118	fruR	fructose repressor	15	7	1	8	2	2	4	10	14	900	1020
SL1344_0119	mraZ	conserved hypothetical protein.	2	2	2	17	10	18	37	15	47	2126	2060
SL1344_0120	mraW	S-adenosyl-methyltransferase	21	7	7	18	8	6	4	22	44	1131	1764
SL1344_0121	ftsL	cell division protein FtsL	6	2	2	7	8	6	0	6	8	731	1000
SL1344_0122	ftsI	penicillin-binding protein 3 precursor	21	3	9	13	8	14	2	24	32	1170	1332
SL1344_0123	murE	UDP-N-acetylmuramoylalanyl-D-glutamate--2,6-dia minopimelate ligase	44	9	6	15	4	11	4	34	48	397	409
SL1344_0124	murF	UDP-N-acetylmuramoylalanyl-D-glutamyl-2,6-diami nopimelate--D-alan alanyl ligase	31	10	1	17	6	12	8	5	30	208	292
SL1344_0125	mraY	Phospho-N-acetylmuramoyl-pentapeptide-transferase	11	4	6	10	5	12	4	10	33	298	230
SL1344_0126	murD	UDP-N-acetylmuramoylalanine--D-glutamate ligase	43	10	1	7	1	3	13	30	50	315	241
SL1344_0127	ftsW	cell division protein FtsW	24	0	0	4	6	17	3	4	20	226	181
SL1344_0128	murG	UDP-N-acetylglucosamine--N-acetylmuramyl-	37	6	2	4	4	5	10	13	33	166	201
SL1344_0129	murC	UDP-N-acetylmuramate--L-alanine ligase	29	7	3	9	6	6	12	22	46	462	520
SL1344_0130	ddl	D-alanine--D-alanine ligase	20	6	4	17	6	9	2	33	23	405	461
SL1344_0131	ftsQ	cell division protein FtsQ	4	4	3	12	6	9	6	6	23	783	821
SL1344_0132	ftsA	cell division protein FtsA	20	5	4	22	4	12	8	16	42	1511	1617
SL1344_0133	ftsZ	cell division protein FtsZ	24	12	8	60	12	36	2	42	96	1175	1686
SL1344_0134	lpxC	UDP-3-O-[3-hydroxymyristoyl] N-acetylglucosamine deacetylase	9	13	4	44	13	28	16	47	109	6897	8693
SL1344_0135	yacA	conserved hypothetical protein	8	2	2	6	2	6	4	2	13	1810	2297
SL1344_0136	secA	preprotein translocase SecA subunit	43	12	8	18	12	14	16	18	42	1585	2888
SL1344_0137	mutT	7,8-dihydro-8-oxoguanine-triphosphatase	2	2	0	0	2	4	0	0	5	195	281
SL1344_0138	yacG	conserved hypothetical protein	0	1	1	0	0	2	0	0	2	146	327
SL1344_0139	yacF	conserved hypothetical protein	8	5	2	10	4	4	8	4	11	652	1675
SL1344_0140	coaE	Dephospho-CoA kinase	6	5	2	0	0	2	5	2	18	1144	1840
SL1344_0141	guaC	GMP reductase	44	4	2	17	2	7	6	16	30	2615	4490
SL1344_0142	hofC	protein transport protein HofC	19	2	0	0	2	2	2	1	0	116	274
SL1344_0143	hofB	protein transport protein HofB	10	0	0	2	2	0	4	0	8	51	55
[truncated: 4,581 more rows]
