# Supplementary material for: Transcriptome and proteome analysis of Salmonella enterica serovar Typhimurium systemic infection of wild type and immune-deficient mice
Source: PLoS One. 2017 Aug 10;12(8):e0181365. doi: 10.1371/journal.pone.0181365 (PMC5552096; doi:10.1371/journal.pone.0181365)
Supplement: S2 Table — The pathways that were statistically overrepresented among the DE genes are listed for each of the datasets compared. (XLS) [file pone.0181365.s002.xls]

## Sheet: Sheet1
Datasets compared	Number of DE genes (up-regulated genes, down-regulated genes, at FDR <= 0.05 and Fold Change >= 2.0)	Pathways in DE gene datasets
Group 1 vs Input	Total: 786
	Up-regulated: 315	Two-component system; ABC transporters; Peptidoglycan biosynthesis
	Down-regulated: 471	Ribosome; Glycerophospholipid metabolism; TCA cycle; Oxidative phosphorylation Butanoate metabolism; Two-component system; Pyruvate metabolism; Electron transport chain
Group 2 vs Input	Total: 753
	Up-regulated: 237	Ribosome; Two-component system; Bacterial secretion system; Nitrogen metabolism
	Down-regulated: 516	Glycerophospholipid metabolism; Two-component system; Flagellar assembly; Pyrimidine metabolism; Bacterial chemotaxis; ABC transporters
Group 3 vs Input	Total: 729
	Up-regulated: 206	Nitrogen metabolism; Biosynthesis of siderophore group nonribosomal peptides; Two-component system; Cobalamin metabolic process; Arginine and proline metabolism
	Down-regulated: 523	Pyrimidine metabolism; Two-component system; Purine metabolism; Glycerophospholipid metabolism; Flagellar assembly
Group 1 vs Group 2	Total: 210
	Up-regulated: 167	ABC transporters; Two-component system
	Down-regulated: 43	Ribosome
Group 1 vs Group 3	Total: 64
	Up-regulated: 33	None
	Down-regulated: 31	None
Group 2 vs Group 3	Total: 18
	Up-regulated: 8	None
	Down-regulated: 10	None
