# Supplementary material for: Transcriptome and proteome analysis of Salmonella enterica serovar Typhimurium systemic infection of wild type and immune-deficient mice
Source: PLoS One. 2017 Aug 10;12(8):e0181365. doi: 10.1371/journal.pone.0181365 (PMC5552096; doi:10.1371/journal.pone.0181365)
Supplement: S3 Table — Table showing the DE genes from the Group 1 S. Typhimurium vs in vitro Input comparison. (XLS) [file pone.0181365.s003.xls]

## Sheet: Group 1 vs in vitro Input
Gene Name	Product Annotation	BaseMean	BaseMeanA	BaseMeanB	Fold Change	log2 Fold-Change	P-value	False Discovery Rate (FDR)	Effect
aat	leucyl/phenylalanyl-tRNA-protein transferase	25.2664	10.1693	35.3312	3.47431	1.79673	0.00605348	0.0517513	Upregulated
aceA	isocitrate lyase	57.9308	12.5347	88.1949	7.03609	2.81477	0.00910382	0.0711338	Upregulated
ackA	acetate kinase	189.762	397.756	51.0992	0.128469	-2.96051	5.23e-09	3e-07	Downregulated
acrR	potential acrAB operon repressor	119.705	277.853	14.2738	0.0513717	-4.28288	0.0142067	0.0995617	Downregulated
ada	ADA regulatory protein	41.6123	11.9537	61.3847	5.13521	2.36042	0.0140208	0.0987174	Upregulated
adh	alcohol dehydrogenase	354.117	608.054	184.826	0.303962	-1.71803	2.51e-12	3.09e-10	Downregulated
adiY	putative AraC family regulatory protein	107.811	200.037	46.3271	0.231592	-2.11034	5.39e-09	3.07e-07	Downregulated
araD	L-ribulose-5-phosphate 4-epimerase	12.16	3.69583	17.8027	4.81697	2.26813	3.27e-06	8.82e-05	Upregulated
arcA	global response regulator	412.1	922.798	71.6354	0.0776285	-3.68727	3.05e-19	1.17e-16	Downregulated
argR	arginine repressor	50.3525	118.353	5.01921	0.042409	-4.55949	2.61e-06	7.34e-05	Downregulated
artI	arginine-binding periplasmic protein 1 precursor	116.438	247.879	28.8101	0.116226	-3.10499	1.28e-09	8.4e-08	Downregulated
artJ	arginine-binding periplasmic protein 2 precursor	119.558	282.721	10.7836	0.0381421	-4.71247	1.61e-16	3.76e-14	Downregulated
artP	arginine transport ATP-binding protein ArtP	143.887	284.581	50.0915	0.176018	-2.5062	0.000230928	0.0034481	Downregulated
asnS	asparaginyl-tRNA synthetase	122.665	243.526	42.0917	0.172843	-2.53247	0.00011389	0.00190011	Downregulated
aspA	aspartate ammonia-lyase	739.373	1676.41	114.681	0.0684084	-3.86968	4.95e-09	2.9e-07	Downregulated
astD	succinylglutamic semialdehyde dehydrogenase	56.0389	4.35903	90.4922	20.7597	4.37571	0.0055722	0.0485896	Upregulated
astE	Succinylglutamate desuccinylase	18.8731	4.3033	28.5863	6.64287	2.73181	1.07e-11	1.08e-09	Upregulated
atpI	ATP synthase protein I.	89.1432	200.692	14.7776	0.0736336	-3.76349	1.39e-08	6.98e-07	Downregulated
bcfG	fimbrial chaperone	15.2344	5.73543	21.5671	3.76033	1.91086	1.3e-06	4.25e-05	Upregulated
blc	putative lipoprotein	27.8376	52.3184	11.5171	0.220135	-2.18354	0.0135237	0.0961635	Downregulated
caiA	probable carnitine operon oxidoreductase CaiA	19.2909	3.11234	30.0765	9.66364	3.27257	1.01e-11	1.07e-09	Upregulated
cbiC	precorrin-8X methylmutase	21.1703	2.94616	33.3197	11.3095	3.49947	4.96e-11	4.32e-09	Upregulated
cbiK	sirohydrochlorin cobaltochelatase (ec 4.99.1.3)	23.0001	5.97423	34.3506	5.7498	2.52351	4.16e-12	4.69e-10	Upregulated
cbiQ	putative cobalt transport protein	14.0049	4.19049	20.5478	4.90343	2.29379	6.18e-05	0.0011157	Upregulated
cbpA	curved DNA-binding protein	119.917	255.442	29.5669	0.115748	-3.11094	1.56e-11	1.5e-09	Downregulated
ccmE2	protoheme transport protein	24.7836	1.03947	40.613	39.0708	5.28802	0.00380232	0.0362495	Upregulated
ccmF2	cytochrome C-type biogenesis protein	87.5647	1.9028	144.673	76.0313	6.24852	0.00154	0.0169271	Upregulated
ccmH1	cytochrome c-type biogenesis protein H1	54.8895	2.95629	89.5116	30.2783	4.92021	0.0106458	0.0791175	Upregulated
cII	bacteriophage regulatory protein	4.80696	0.724169	7.52882	10.3965	3.37802	3.82e-06	0.000101252	Upregulated
citD	citrate lyase acyl carrier protein	19.0736	1.04876	31.0901	29.6445	4.88969	0.00326081	0.031782	Upregulated
citE	citrate lyase beta chain	40.6218	2.63778	65.9446	25	4.64386	0.0073972	0.0601713	Upregulated
citX	apo-citrate lyase phosphoribosyl-dephospho-coa transferase (ec 2.7.7.61) (holo-acp synthase) (holo-citrate lyase synthase) (apo- acp nucleodityltransferase)	23.0251	0.390288	38.115	97.6587	6.60968	0.010696	0.0794007	Upregulated
citX2	apo-citrate lyase phosphoribosyl-dephospho-CoA transferase	9.35022	0.435886	15.2931	35.0851	5.13279	9.04e-11	7.21e-09	Upregulated
cobU	cobinamide kinase and guanylyltransferase	17.1136	4.45091	25.5554	5.74162	2.52146	2.9e-06	8e-05	Upregulated
creB	putative two-component response regulator	27.491	12.3195	37.6054	3.05251	1.61	2.1e-07	8.03e-06	Upregulated
creC	two-component sensor kinase	39.1073	6.02692	61.1608	10.1479	3.34311	0.00501586	0.0446918	Upregulated
crl	curlin genes transcriptional activator	47.2148	97.7613	13.517	0.138266	-2.85449	6.04e-06	0.000150225	Downregulated
crr	pts system, glucose-specific IIA component	89.0931	161.142	41.0608	0.254812	-1.9725	0.0044304	0.0404676	Downregulated
csiD	Protein csiD.	34.8213	12.2692	49.856	4.06352	2.02273	1.07e-07	4.48e-06	Upregulated
cspC	cold shock-like protein CspC	117.671	222.058	48.0799	0.21652	-2.20743	1.85e-05	0.000381027	Downregulated
cybC	soluble cytochrome b562	29.3015	67.6072	3.76441	0.0556806	-4.16668	0.00174461	0.0188421	Downregulated
cysN	Sulfate adenylyltransferase subunit 1	47.2574	17.0492	67.3961	3.95303	1.98296	0.0132741	0.0950847	Upregulated
dapA	Dihydrodipicolinate synthase	74.68	128.083	39.0782	0.305102	-1.71264	0.0028074	0.0284657	Downregulated
dctA	C4-dicarboxylate transport protein	86.8506	165.247	34.5861	0.209299	-2.25636	0.00341758	0.0330147	Downregulated
dcuA	anaerobic C4-dicarboxylate transporter	169.352	317.421	70.6392	0.222541	-2.16786	1.4e-06	4.54e-05	Downregulated
ddl	D-alanine--D-alanine ligase	45.4208	19.5928	62.6395	3.19707	1.67675	0.00153743	0.0169271	Upregulated
def	polypeptide deformylase	99.8028	201.41	32.0649	0.159202	-2.65107	0.00124802	0.0140968	Downregulated
dhaF	glycerol dehydratase reactivation factor large subunit (pseudogene)	6.57741	0.268186	10.7836	40.2093	5.32946	8.11e-10	5.58e-08	Upregulated
dmsA	anaerobic dimethyl sulfoxide reductase chain A precursor	273.716	548.199	90.7277	0.165501	-2.59509	0.000652965	0.00832436	Downregulated
dnaT	primosomal protein I	26.9413	50.4134	11.2932	0.224013	-2.15835	0.0115836	0.0847392	Downregulated
dppA	periplasmic dipeptide transport protein precursor	182.084	358.663	64.3652	0.179459	-2.47828	6.07e-07	2.13e-05	Downregulated
dppC	dipeptide transport system permease protein DppC	40.9983	8.51912	62.6511	7.35417	2.87856	0.00511083	0.0452366	Upregulated
dppF	dipeptide transport ATP-binding protein DppF	23.3454	6.83756	34.3506	5.02381	2.32878	4.91e-11	4.32e-09	Upregulated
dps	DNA protection during starvation protein	1303.52	2851.42	271.59	0.0952471	-3.39218	0.00419059	0.0387645	Downregulated
dsbA	thiol:disulfide interchange protein	43.8961	81.1539	19.0575	0.234832	-2.0903	7.97e-06	0.00018966	Downregulated
dsdA	D-serine dehydratase	53.6934	17.6878	77.6971	4.3927	2.13511	4.44e-17	1.26e-14	Upregulated
dut	deoxyuridine 5'-triphosphate nucleotidohydrolase	41.1793	70.2444	21.8026	0.310382	-1.68788	0.0101967	0.0768274	Downregulated
eco	Ecotin precursor.	77.691	161.524	21.8026	0.134981	-2.88917	4.31e-05	0.000810355	Downregulated
emrR	putative transcriptional regulator	85.1894	188.152	16.5479	0.0879498	-3.50718	8.3e-05	0.00145144	Downregulated
entD	enterobactin synthetase component D	15.0654	4.19505	22.3123	5.31871	2.41108	0.00898902	0.070405	Upregulated
eutD	putative phosphate acyltransferase	46.8701	1.31847	77.2378	58.5815	5.87237	0.00777237	0.0623697	Upregulated
eutE	putative aldehyde dehydrogenase	44.5727	1.98623	72.9637	36.7348	5.19907	0.00478549	0.0429316	Upregulated
eutG	putative alchohol dehydrogenase	45.9997	1.02478	75.983	74.1456	6.21229	0.00618198	0.052575	Upregulated
eutH	putative membrane protein	49.0078	8.20922	76.2069	9.28308	3.2146	0.0132563	0.0950619	Upregulated
eutJ	putative ethanolamine utilization protein EutJ	39.109	1.14925	64.4156	56.0502	5.80865	6.77e-07	2.33e-05	Upregulated
eutK	ethanolamine utilization protein EutK	25.4058	4.12395	39.5937	9.60092	3.26317	0.000168825	0.00266694	Upregulated
eutN	ethanolamine utilization protein	18.6851	0.497697	30.8101	61.9052	5.95199	0.00592445	0.0508476	Upregulated
eutR	ethanolamine operon transcriptional regulator	29.1311	9.30223	42.3504	4.55271	2.18673	9.31e-09	4.91e-07	Upregulated
exc	surface exclusion protein	245.009	545.25	44.8484	0.0822528	-3.60379	8.75e-17	2.39e-14	Downregulated
exoX	exodeoxyribonuclease X	42.9234	91.915	10.2623	0.11165	-3.16295	0.000195068	0.0029947	Downregulated
fimA	type-1 fimbrial protein, a chain precursor	100.126	225.493	16.5479	0.0733854	-3.76836	1.93e-09	1.21e-07	Downregulated
fimB	putative type 1 fimbriae regulatory protein	53.8504	97.8044	24.5477	0.250987	-1.99431	3.2e-09	1.95e-07	Downregulated
fimF	putative fimbrial protein in fimZ 5' region	13.5168	5.97034	18.5478	3.10666	1.63537	0.000907062	0.0109048	Upregulated
fimZ	probable transcriptional regulator (FimXZ protein)	49.6153	120.274	2.50961	0.0208658	-5.58272	1.09e-07	4.55e-06	Downregulated
fixA	probable flavoprotein subunit	22.4795	4.31952	34.5861	8.00694	3.00125	1.07e-11	1.08e-09	Upregulated
fixB	probable flavoprotein subunit	20.9483	0.844752	34.3506	40.6636	5.34566	0.00958357	0.0736505	Upregulated
flaG	flagellin	284	649.902	40.0646	0.0616472	-4.01982	5.48e-05	0.00100968	Downregulated
fldA	flavodoxin 1	91.8672	192.864	24.5361	0.12722	-2.97461	1.72e-07	6.86e-06	Downregulated
fldB	flavodoxin II	33.3669	79.6527	2.50961	0.0315068	-4.98819	1.08e-05	0.000245658	Downregulated
flgM	negative regulator of flagellin synthesis (anti-sigma factor)	163.864	359.31	33.5668	0.0934201	-3.42012	0.0136766	0.0969068	Downregulated
flhC	flagellar transcriptional activator	35.6075	81.49	5.01921	0.061593	-4.02109	0.000417793	0.00583838	Downregulated
fliB	lysine-N-methylase (ec 2.1.1.-) (lysine N-methyltransferase)	37.7148	75.1116	12.7835	0.170193	-2.55475	0.0113659	0.0835206	Downregulated
fliC	flagellin	569.001	1378.54	29.3082	0.0212603	-5.55569	1.38e-21	9.05e-19	Downregulated
fliD	flagellar hook associated protein (FliD)	366.457	870.264	30.5862	0.0351459	-4.8305	8.18e-45	1.34e-41	Downregulated
fliZ	FliZ protein	38.9461	68.779	19.0575	0.277083	-1.85161	0.0133752	0.0953081	Downregulated
fnr	fumarate and nitrate reduction regulatory protein	357.445	792.535	67.3845	0.085024	-3.55599	4.29e-12	4.76e-10	Downregulated
focA	probable formate transporter (formate channel)	255.312	497.806	93.6502	0.188126	-2.41023	0.000237636	0.00353213	Downregulated
FQ312003.3325	FQ312003.3325	97.9414	202.756	28.065	0.138418	-2.8529	6.92e-06	0.000168202	Downregulated
FQ312003.3689	FQ312003.3689	63.9864	152.437	5.01921	0.0329264	-4.92461	0.0113314	0.0833605	Downregulated
FQ312003.4083	FQ312003.4083	144.17	274.012	57.6087	0.210241	-2.24988	2.89e-06	8e-05	Downregulated
FQ312003_intergenic_1000151_1000308	FQ312003_intergenic_1000151_1000308	39.1834	87.4298	7.01915	0.0802833	-3.63876	7.49e-05	0.00132665	Downregulated
FQ312003_intergenic_100694_100791	FQ312003_intergenic_100694_100791	10.0885	1.9283	15.5286	8.05297	3.00952	0.000628321	0.0080573	Upregulated
FQ312003_intergenic_1047490_1047995	FQ312003_intergenic_1047490_1047995	110.542	259.063	11.5287	0.0445015	-4.49	0.000312361	0.00452958	Downregulated
FQ312003_intergenic_1051690_1051833	FQ312003_intergenic_1051690_1051833	5.14244	0.445175	8.27395	18.5858	4.21613	8.32e-06	0.000195627	Upregulated
FQ312003_intergenic_1072777_1072883	FQ312003_intergenic_1072777_1072883	2.50751	0.622164	3.76441	6.05051	2.59706	0.00696993	0.0574821	Upregulated
FQ312003_intergenic_1118390_1118645	FQ312003_intergenic_1118390_1118645	121.235	237.37	43.8116	0.184571	-2.43775	0.00438109	0.0401856	Downregulated
FQ312003_intergenic_11296_11542	FQ312003_intergenic_11296_11542	41.0328	80.4156	14.7776	0.183766	-2.44406	1.46e-05	0.000315488	Downregulated
FQ312003_intergenic_1169862_1170587	FQ312003_intergenic_1169862_1170587	140.201	344.857	3.76441	0.0109159	-6.51743	0.00142395	0.0159191	Downregulated
FQ312003_intergenic_1224290_1224445	FQ312003_intergenic_1224290_1224445	3.1494	0.34469	5.01921	14.5615	3.86409	0.00391642	0.0371854	Upregulated
FQ312003_intergenic_1246254_1246494	FQ312003_intergenic_1246254_1246494	11.9708	2.10529	18.5478	8.8101	3.13916	1.91e-07	7.41e-06	Upregulated
FQ312003_intergenic_1291293_1291894	FQ312003_intergenic_1291293_1291894	99.5711	208.377	27.0341	0.129737	-2.94634	0.00164413	0.017951	Downregulated
FQ312003_intergenic_1295345_1295925	FQ312003_intergenic_1295345_1295925	51.1523	103.076	16.5363	0.160428	-2.64	0.00571667	0.0494537	Downregulated
FQ312003_intergenic_1307302_1307397	FQ312003_intergenic_1307302_1307397	5.17676	0.530968	8.27395	15.5828	3.96188	1.8e-05	0.000377054	Upregulated
FQ312003_intergenic_1326592_1326802	FQ312003_intergenic_1326592_1326802	45.1473	80.955	21.2755	0.262807	-1.92793	0.00013171	0.00214808	Downregulated
FQ312003_intergenic_1368214_1369004	FQ312003_intergenic_1368214_1369004	56.2984	128.335	8.27395	0.0644714	-3.9552	0.000383136	0.0054119	Downregulated
FQ312003_intergenic_1407157_1407343	FQ312003_intergenic_1407157_1407343	51.8582	110.488	12.7719	0.115596	-3.11284	1.13e-08	5.92e-07	Downregulated
FQ312003_intergenic_1462286_1462474	FQ312003_intergenic_1462286_1462474	19.7148	47.4047	1.2548	0.02647	-5.2395	0.00178689	0.0192494	Downregulated
FQ312003_intergenic_1495400_1496002	FQ312003_intergenic_1495400_1496002	26.0203	5.64271	39.6053	7.01884	2.81123	2.08e-13	2.83e-11	Upregulated
FQ312003_intergenic_1576510_1576585	FQ312003_intergenic_1576510_1576585	2.41044	0.37948	3.76441	9.91992	3.31033	0.001916	0.0203419	Upregulated
FQ312003_intergenic_1677771_1678095	FQ312003_intergenic_1677771_1678095	9.23809	0.937468	14.7718	15.7572	3.97794	0.000462701	0.00635927	Upregulated
FQ312003_intergenic_1706565_1706950	FQ312003_intergenic_1706565_1706950	86.3649	202.384	9.01909	0.0445643	-4.48797	2.6e-06	7.34e-05	Downregulated
FQ312003_intergenic_1855531_1855600	FQ312003_intergenic_1855531_1855600	7.43967	1.30614	11.5287	8.82654	3.14185	8.35e-05	0.00145585	Upregulated
FQ312003_intergenic_1925541_1925813	FQ312003_intergenic_1925541_1925813	16.0915	38.3465	1.2548	0.0327227	-4.93356	1.65e-06	5.11e-05	Downregulated
FQ312003_intergenic_1969052_1969144	FQ312003_intergenic_1969052_1969144	6.6986	0.571162	10.7836	18.88	4.23879	0.00215471	0.0226922	Upregulated
FQ312003_intergenic_1979685_1980370	FQ312003_intergenic_1979685_1980370	131.155	295.956	21.2871	0.0719267	-3.79733	4.86e-08	2.18e-06	Downregulated
FQ312003_intergenic_2003085_2003252	FQ312003_intergenic_2003085_2003252	3.39178	0.950641	5.01921	5.27982	2.40049	0.00358885	0.0344656	Upregulated
FQ312003_intergenic_2039709_2040021	FQ312003_intergenic_2039709_2040021	74.511	151.692	23.0574	0.152002	-2.71784	0.000558415	0.00730407	Downregulated
FQ312003_intergenic_2058461_2058553	FQ312003_intergenic_2058461_2058553	3.09252	0.20249	5.01921	24.7874	4.63153	1.25e-05	0.000281559	Upregulated
FQ312003_intergenic_2060888_2060903	FQ312003_intergenic_2060888_2060903	4.37804	0.425078	7.01335	16.499	4.0443	0.00255055	0.0262274	Upregulated
FQ312003_intergenic_2067465_2067721	FQ312003_intergenic_2067465_2067721	14.9441	0.89187	24.3122	27.2598	4.7687	2.91e-11	2.65e-09	Upregulated
FQ312003_intergenic_2079825_2080015	FQ312003_intergenic_2079825_2080015	66.8146	158.39	5.76435	0.0363934	-4.78018	1.05e-05	0.00023923	Downregulated
FQ312003_intergenic_2093600_2093960	FQ312003_intergenic_2093600_2093960	192.405	446.445	23.0458	0.0516207	-4.27591	1.13e-10	8.83e-09	Downregulated
FQ312003_intergenic_2131749_2131892	FQ312003_intergenic_2131749_2131892	93.665	216.105	12.0384	0.0557061	-4.16602	0.00707741	0.0581486	Downregulated
FQ312003_intergenic_2274523_2274547	FQ312003_intergenic_2274523_2274547	5.81865	0.253493	9.52876	37.5898	5.23227	2.05e-08	1.01e-06	Upregulated
FQ312003_intergenic_2277817_2277892	FQ312003_intergenic_2277817_2277892	4.50271	0.728054	7.01915	9.64098	3.26918	0.000955265	0.0114422	Upregulated
FQ312003_intergenic_2291816_2291931	FQ312003_intergenic_2291816_2291931	3.99473	0.222588	6.50948	29.2446	4.8701	0.0119688	0.0871839	Upregulated
FQ312003_intergenic_2305121_2305388	FQ312003_intergenic_2305121_2305388	4.36328	0.37948	7.01915	18.4968	4.2092	9.81e-05	0.00168005	Upregulated
FQ312003_intergenic_2307525_2307811	FQ312003_intergenic_2307525_2307811	12.4222	2.1161	19.293	9.11723	3.1886	1.89e-06	5.74e-05	Upregulated
FQ312003_intergenic_2319859_2320148	FQ312003_intergenic_2319859_2320148	73.7882	165.313	12.7719	0.0772591	-3.69415	0.00186495	0.0198645	Downregulated
FQ312003_intergenic_2437265_2437558	FQ312003_intergenic_2437265_2437558	44.0637	97.7483	8.27395	0.0846455	-3.56242	0.000366168	0.00519188	Downregulated
FQ312003_intergenic_253893_254242	FQ312003_intergenic_253893_254242	212.488	448.966	54.8365	0.12214	-3.0334	7.6e-05	0.00134384	Downregulated
FQ312003_intergenic_2541969_2542251	FQ312003_intergenic_2541969_2542251	61.9724	153.049	1.2548	0.00819872	-6.93039	6.63e-11	5.49e-09	Downregulated
FQ312003_intergenic_2594527_2594999	FQ312003_intergenic_2594527_2594999	95.7933	222.208	11.5171	0.0518303	-4.27006	0.000119594	0.00197014	Downregulated
FQ312003_intergenic_2681193_2681251	FQ312003_intergenic_2681193_2681251	71.7331	172.568	4.50954	0.0261319	-5.25804	3e-10	2.26e-08	Downregulated
FQ312003_intergenic_274049_274127	FQ312003_intergenic_274049_274127	4.23993	0.0710996	7.01915	98.7228	6.62531	6.41e-07	2.24e-05	Upregulated
FQ312003_intergenic_2755773_2755958	FQ312003_intergenic_2755773_2755958	7.72105	0.89187	12.2738	13.7619	3.78261	0.000357541	0.00513916	Upregulated
FQ312003_intergenic_2768884_2768934	FQ312003_intergenic_2768884_2768934	69.4297	168.692	3.25474	0.019294	-5.69571	5.8e-06	0.000146124	Downregulated
FQ312003_intergenic_2770435_2770585	FQ312003_intergenic_2770435_2770585	4.38826	1.55963	6.27401	4.02275	2.00818	0.00169164	0.0183674	Upregulated
FQ312003_intergenic_2833416_2833437	FQ312003_intergenic_2833416_2833437	7.84407	17.728	1.2548	0.070781	-3.82049	0.00723127	0.0591156	Downregulated
FQ312003_intergenic_2862841_2862953	FQ312003_intergenic_2862841_2862953	98.3524	242.117	2.50961	0.0103653	-6.5921	0.00203763	0.0215633	Downregulated
FQ312003_intergenic_2863777_2863872	FQ312003_intergenic_2863777_2863872	55.1427	125.446	8.27395	0.0659564	-3.92234	0.00252406	0.0260368	Downregulated
FQ312003_intergenic_2920037_2920158	FQ312003_intergenic_2920037_2920158	2.8028	0.242685	4.50954	18.5819	4.21583	0.0140529	0.0987174	Upregulated
FQ312003_intergenic_2921939_2922954	FQ312003_intergenic_2921939_2922954	26.8287	8.79896	38.8486	4.41513	2.14246	0.00614802	0.0523867	Upregulated
FQ312003_intergenic_2965507_2965535	FQ312003_intergenic_2965507_2965535	2.77065	0.162296	4.50954	27.7859	4.79628	0.00665772	0.0554669	Upregulated
FQ312003_intergenic_298129_298180	FQ312003_intergenic_298129_298180	2.46732	0.521679	3.76441	7.21595	2.85119	0.00418169	0.0387369	Upregulated
FQ312003_intergenic_3022215_3022323	FQ312003_intergenic_3022215_3022323	5.52089	0.27359	9.01909	32.9657	5.04289	3.1e-05	0.000604134	Upregulated
FQ312003_intergenic_3046708_3046937	FQ312003_intergenic_3046708_3046937	53.4291	120.044	9.01909	0.0751315	-3.73444	0.000223158	0.00337837	Downregulated
FQ312003_intergenic_3066559_3066914	FQ312003_intergenic_3066559_3066914	64.9739	150.788	7.76429	0.0514913	-4.27953	0.00178954	0.0192494	Downregulated
FQ312003_intergenic_3085623_3085692	FQ312003_intergenic_3085623_3085692	4.27209	0.151488	7.01915	46.3347	5.53402	5.85e-06	0.000146124	Upregulated
FQ312003_intergenic_3136109_3136488	FQ312003_intergenic_3136109_3136488	23.7801	4.2268	36.8157	8.71007	3.12268	3.86e-08	1.82e-06	Upregulated
FQ312003_intergenic_3138169_3138679	FQ312003_intergenic_3138169_3138679	1043.9	2336.41	182.225	0.0779937	-3.6805	0.00445578	0.0406427	Downregulated
FQ312003_intergenic_3195470_3195486	FQ312003_intergenic_3195470_3195486	1.60716	0.253493	2.50961	9.9001	3.30744	0.0140529	0.0987174	Upregulated
FQ312003_intergenic_3239110_3239134	FQ312003_intergenic_3239110_3239134	4.27641	0.162296	7.01915	43.249	5.43459	5.85e-06	0.000146124	Upregulated
FQ312003_intergenic_3242827_3243091	FQ312003_intergenic_3242827_3243091	222.452	496.405	39.8176	0.0802119	-3.64004	1.41e-11	1.37e-09	Downregulated
FQ312003_intergenic_3246207_3246259	FQ312003_intergenic_3246207_3246259	3.39239	0.952161	5.01921	5.27139	2.39818	0.00220022	0.02306	Upregulated
FQ312003_intergenic_3271796_3271989	FQ312003_intergenic_3271796_3271989	46.7691	99.6472	11.5171	0.115579	-3.11305	0.0101121	0.0764547	Downregulated
FQ312003_intergenic_3295662_3295985	FQ312003_intergenic_3295662_3295985	70.1282	164.792	7.01915	0.0425941	-4.5532	9.38e-05	0.00161661	Downregulated
FQ312003_intergenic_3300322_3300462	FQ312003_intergenic_3300322_3300462	7.5166	2.61616	10.7836	4.1219	2.04331	0.000493038	0.00660751	Upregulated
FQ312003_intergenic_3321073_3321271	FQ312003_intergenic_3321073_3321271	11.4996	2.045	17.8027	8.70547	3.12192	1.31e-08	6.71e-07	Upregulated
FQ312003_intergenic_3369121_3369220	FQ312003_intergenic_3369121_3369220	30.6501	74.7431	1.2548	0.0167882	-5.89641	0.000108686	0.00181792	Downregulated
FQ312003_intergenic_3379260_3379595	FQ312003_intergenic_3379260_3379595	55.9959	111.05	19.293	0.173732	-2.52507	0.000502108	0.0067016	Downregulated
FQ312003_intergenic_3417512_3417760	FQ312003_intergenic_3417512_3417760	87.0123	148.393	46.0916	0.310604	-1.68685	0.00934992	0.0724202	Downregulated
FQ312003_intergenic_3422658_3422669	FQ312003_intergenic_3422658_3422669	5.10009	0.339286	8.27395	24.3864	4.60801	2.53e-06	7.28e-05	Upregulated
FQ312003_intergenic_350141_350370	FQ312003_intergenic_350141_350370	25.1493	60.9912	1.2548	0.0205735	-5.60307	0.00185445	0.0197848	Downregulated
FQ312003_intergenic_3530480_3530513	FQ312003_intergenic_3530480_3530513	4.67681	0.0455983	7.76429	170.276	7.41173	0.0105146	0.0784995	Upregulated
FQ312003_intergenic_3532659_3532820	FQ312003_intergenic_3532659_3532820	26.7984	62.1139	3.25474	0.0523996	-4.2543	0.000477926	0.00646658	Downregulated
FQ312003_intergenic_3534710_3534911	FQ312003_intergenic_3534710_3534911	48.0394	112.57	5.01921	0.0445875	-4.48722	0.00920395	0.0716848	Downregulated
FQ312003_intergenic_3549085_3549397	FQ312003_intergenic_3549085_3549397	82.6644	189.368	11.5287	0.0608799	-4.03789	4.34e-06	0.000112506	Downregulated
FQ312003_intergenic_3549969_3550232	FQ312003_intergenic_3549969_3550232	15.0556	33.8747	2.50961	0.074085	-3.75467	8.5e-05	0.00147761	Downregulated
FQ312003_intergenic_3561124_3561216	FQ312003_intergenic_3561124_3561216	5.33311	0.930544	8.26815	8.88529	3.15142	0.00220022	0.02306	Upregulated
FQ312003_intergenic_3571173_3571464	FQ312003_intergenic_3571173_3571464	14.3471	30.9856	3.25474	0.10504	-3.25098	4.92e-05	0.000919537	Downregulated
FQ312003_intergenic_3636871_3637077	FQ312003_intergenic_3636871_3637077	49.812	99.3723	16.7718	0.168777	-2.56681	5.88e-05	0.00107053	Downregulated
FQ312003_intergenic_3735360_3735382	FQ312003_intergenic_3735360_3735382	4.77389	0.288283	7.76429	26.9329	4.7513	0.000969286	0.0115889	Upregulated
FQ312003_intergenic_3756978_3757198	FQ312003_intergenic_3756978_3757198	9.97069	1.98708	15.2931	7.69629	2.94416	0.0088576	0.0695422	Upregulated
FQ312003_intergenic_3758154_3758298	FQ312003_intergenic_3758154_3758298	59.2747	109.483	25.8025	0.235676	-2.08513	2.78e-06	7.77e-05	Downregulated
FQ312003_intergenic_3781840_3782126	FQ312003_intergenic_3781840_3782126	234.9	545.547	27.8024	0.0509624	-4.29442	0.00655461	0.0548876	Downregulated
FQ312003_intergenic_3825795_3825938	FQ312003_intergenic_3825795_3825938	40.5682	92.774	5.76435	0.0621332	-4.00849	0.00288621	0.0290825	Downregulated
FQ312003_intergenic_3854834_3854951	FQ312003_intergenic_3854834_3854951	3.25235	0.602067	5.01921	8.33663	3.05946	0.000476977	0.00646658	Upregulated
FQ312003_intergenic_3873924_3873996	FQ312003_intergenic_3873924_3873996	4.68355	1.18015	7.01915	5.94766	2.57232	0.00458167	0.0414442	Upregulated
FQ312003_intergenic_3876775_3876903	FQ312003_intergenic_3876775_3876903	2.78672	0.20249	4.50954	22.2704	4.47706	0.0100393	0.0759922	Upregulated
FQ312003_intergenic_3923753_3923937	FQ312003_intergenic_3923753_3923937	5.14244	0.445175	8.27395	18.5858	4.21613	8.32e-06	0.000195627	Upregulated
FQ312003_intergenic_3964008_3964027	FQ312003_intergenic_3964008_3964027	2.78085	0.187798	4.50954	24.0128	4.58573	0.0123595	0.0896135	Upregulated
FQ312003_intergenic_397604_397995	FQ312003_intergenic_397604_397995	14.988	0.23728	24.8219	104.61	6.70887	0.00454407	0.041161	Upregulated
FQ312003_intergenic_4008934_4008975	FQ312003_intergenic_4008934_4008975	2.73201	0.0656954	4.50954	68.6432	6.10105	0.00189851	0.0201891	Upregulated
FQ312003_intergenic_4031699_4031898	FQ312003_intergenic_4031699_4031898	48.6839	116.063	3.76441	0.0324342	-4.94634	1.46e-06	4.69e-05	Downregulated
FQ312003_intergenic_4033563_4033583	FQ312003_intergenic_4033563_4033583	3.58628	0.319188	5.76435	18.0594	4.17468	0.00116836	0.0133352	Upregulated
FQ312003_intergenic_4069436_4069464	FQ312003_intergenic_4069436_4069464	5.73549	0.0455983	9.52876	208.972	7.70716	3.84e-05	0.000731944	Upregulated
FQ312003_intergenic_4146288_4146330	FQ312003_intergenic_4146288_4146330	47.994	108.339	7.76429	0.0716668	-3.80255	5.03e-05	0.00093177	Downregulated
FQ312003_intergenic_4167601_4167861	FQ312003_intergenic_4167601_4167861	82.4458	180.201	17.2756	0.0958688	-3.3828	1.29e-05	0.000289902	Downregulated
FQ312003_intergenic_4193622_4193864	FQ312003_intergenic_4193622_4193864	10.5896	2.41671	16.0382	6.63639	2.7304	0.0054179	0.0473704	Upregulated
FQ312003_intergenic_4232471_4232558	FQ312003_intergenic_4232471_4232558	7.94354	3.6835	10.7836	2.92753	1.54968	0.00340752	0.0329662	Upregulated
FQ312003_intergenic_4318205_4318502	FQ312003_intergenic_4318205_4318502	37.4074	82.9897	7.01915	0.0845786	-3.56356	0.0031463	0.0309892	Downregulated
FQ312003_intergenic_4354637_4354696	FQ312003_intergenic_4354637_4354696	6.85441	0.607471	11.019	18.1392	4.18104	0.000476979	0.00646658	Upregulated
FQ312003_intergenic_436345_436534	FQ312003_intergenic_436345_436534	62.4487	145.593	7.01915	0.0482107	-4.3745	0.000514871	0.00681595	Downregulated
FQ312003_intergenic_4381408_4381883	FQ312003_intergenic_4381408_4381883	107.596	214.911	36.0532	0.167758	-2.57554	8.06e-05	0.00141391	Downregulated
FQ312003_intergenic_4398253_4398302	FQ312003_intergenic_4398253_4398302	3.48489	0.0656954	5.76435	87.7435	6.45522	3.73e-05	0.000716869	Upregulated
FQ312003_intergenic_4445622_4445684	FQ312003_intergenic_4445622_4445684	4.27641	0.162296	7.01915	43.249	5.43459	5.85e-06	0.000146124	Upregulated
FQ312003_intergenic_4463153_4463495	FQ312003_intergenic_4463153_4463495	7.80074	2.20882	11.5287	5.2194	2.38388	0.00510649	0.0452366	Upregulated
FQ312003_intergenic_4474779_4474841	FQ312003_intergenic_4474779_4474841	4.40192	0.476081	7.01915	14.7436	3.88202	0.000200997	0.00307131	Upregulated
FQ312003_intergenic_4534811_4534955	FQ312003_intergenic_4534811_4534955	9.21012	0.850156	14.7834	17.3891	4.12011	5.84e-07	2.08e-05	Upregulated
FQ312003_intergenic_4553815_4553880	FQ312003_intergenic_4553815_4553880	12.5826	1.76989	19.791	11.1821	3.48311	0.000487837	0.00655125	Upregulated
FQ312003_intergenic_458212_458320	FQ312003_intergenic_458212_458320	68.0915	127.787	28.2947	0.221421	-2.17514	0.000988611	0.0117555	Downregulated
FQ312003_intergenic_4593013_4593213	FQ312003_intergenic_4593013_4593213	45.8115	92.3709	14.7718	0.159919	-2.64459	0.00790678	0.0633705	Downregulated
FQ312003_intergenic_4595130_4595304	FQ312003_intergenic_4595130_4595304	18.7137	31.3908	10.2623	0.326921	-1.61299	0.00107087	0.0125063	Downregulated
FQ312003_intergenic_4662134_4662300	FQ312003_intergenic_4662134_4662300	53.24	107.925	16.7834	0.15551	-2.68492	0.0132986	0.0951565	Downregulated
FQ312003_intergenic_4745170_4745263	FQ312003_intergenic_4745170_4745263	6.66794	1.25902	10.2739	8.16022	3.02861	0.00621375	0.0527766	Upregulated
FQ312003_intergenic_477195_477303	FQ312003_intergenic_477195_477303	51.3119	103.122	16.7718	0.16264	-2.62025	0.00407171	0.0380958	Downregulated
FQ312003_intergenic_4776468_4776855	FQ312003_intergenic_4776468_4776855	62.099	151.483	2.50961	0.0165669	-5.91555	5.12e-06	0.000130178	Downregulated
FQ312003_intergenic_4777565_4777973	FQ312003_intergenic_4777565_4777973	113.584	268.55	10.2739	0.0382569	-4.70814	1.13e-06	3.75e-05	Downregulated
FQ312003_intergenic_4801235_4801291	FQ312003_intergenic_4801235_4801291	2.49576	0.592779	3.76441	6.35045	2.66686	0.00574929	0.0496702	Upregulated
FQ312003_intergenic_4812377_4812599	FQ312003_intergenic_4812377_4812599	9.01096	1.46996	14.0383	9.55015	3.25552	0.0100215	0.0759447	Upregulated
FQ312003_intergenic_4826173_4826649	FQ312003_intergenic_4826173_4826649	10.106	3.08988	14.7834	4.78447	2.25836	0.0042991	0.0396001	Upregulated
FQ312003_intergenic_4836111_4836411	FQ312003_intergenic_4836111_4836411	132.634	255.702	50.5895	0.197846	-2.33755	0.00339918	0.0329343	Downregulated
FQ312003_intergenic_4845562_4845670	FQ312003_intergenic_4845562_4845670	22.469	40.7791	10.2623	0.251656	-1.99048	0.0114044	0.0837088	Downregulated
FQ312003_intergenic_4876953_4877251	FQ312003_intergenic_4876953_4877251	97.6588	233.627	7.01335	0.0300194	-5.05796	0.000755659	0.00939545	Downregulated
FQ312003_intergenic_510076_510124	FQ312003_intergenic_510076_510124	2.75024	0.111294	4.50954	40.5193	5.34054	0.00393489	0.0371882	Upregulated
FQ312003_intergenic_523885_524014	FQ312003_intergenic_523885_524014	102.437	194.502	41.0608	0.211107	-2.24395	0.00750812	0.0608465	Downregulated
FQ312003_intergenic_527491_527568	FQ312003_intergenic_527491_527568	90.6117	222.765	2.50961	0.0112657	-6.47192	0.000154861	0.00247187	Downregulated
FQ312003_intergenic_617261_618027	FQ312003_intergenic_617261_618027	52.0369	114.681	10.2739	0.0895864	-3.48058	0.00439391	0.0402467	Downregulated
FQ312003_intergenic_631598_631624	FQ312003_intergenic_631598_631624	3.56372	0.262782	5.76435	21.9359	4.45522	0.000793364	0.00973471	Upregulated
FQ312003_intergenic_643352_643439	FQ312003_intergenic_643352_643439	1.56852	0.156892	2.50961	15.9957	3.99962	0.00665772	0.0554669	Upregulated
FQ312003_intergenic_725955_725970	FQ312003_intergenic_725955_725970	5.04753	0.207895	8.27395	39.7988	5.31465	3.43e-07	1.28e-05	Upregulated
FQ312003_intergenic_737334_738299	FQ312003_intergenic_737334_738299	79.2689	156.057	28.0766	0.179912	-2.47464	0.00834985	0.0658722	Downregulated
FQ312003_intergenic_756308_756488	FQ312003_intergenic_756308_756488	93.6579	227.389	4.50374	0.0198063	-5.65789	2.65e-16	5.78e-14	Downregulated
FQ312003_intergenic_765039_765699	FQ312003_intergenic_765039_765699	126.421	298.76	11.5287	0.0385885	-4.69569	3.51e-10	2.58e-08	Downregulated
FQ312003_intergenic_797045_797352	FQ312003_intergenic_797045_797352	82.3876	198.44	5.01921	0.0252933	-5.3051	2.45e-11	2.32e-09	Downregulated
FQ312003_intergenic_807408_808889	FQ312003_intergenic_807408_808889	166.014	320.37	63.1104	0.196992	-2.34379	0.0031122	0.0306996	Downregulated
FQ312003_intergenic_832525_832542	FQ312003_intergenic_832525_832542	1.55028	0.111294	2.50961	22.5494	4.49502	0.00393489	0.0371882	Upregulated
FQ312003_intergenic_833342_833620	FQ312003_intergenic_833342_833620	11.3166	1.5875	17.8027	11.2143	3.48727	0.0095228	0.0734705	Upregulated
FQ312003_intergenic_840902_841023	FQ312003_intergenic_840902_841023	7.14568	0.571162	11.5287	20.1846	4.33519	1.32e-06	4.3e-05	Upregulated
FQ312003_intergenic_88257_88636	FQ312003_intergenic_88257_88636	5.83689	0.299091	9.52876	31.859	4.99363	4.41e-08	2e-06	Upregulated
FQ312003_intergenic_886256_886461	FQ312003_intergenic_886256_886461	10.4342	0.910447	16.7834	18.4342	4.20431	9.23e-07	3.12e-05	Upregulated
FQ312003_intergenic_932915_933160	FQ312003_intergenic_932915_933160	12.1317	25.4473	3.25474	0.127901	-2.9669	0.00047857	0.00646658	Downregulated
FQ312003_intergenic_9993_10041	FQ312003_intergenic_9993_10041	6.24836	1.32776	9.52876	7.17659	2.8433	0.00667393	0.0555312	Upregulated
frdB	fumarate reductase, iron-sulfur protein	36.9921	68.449	16.0208	0.234055	-2.09508	0.00430925	0.0396378	Downregulated
fruB	pts system, fructose-specific IIA/FPR component	34.2897	2.29377	55.6203	24.2485	4.59982	0.00775261	0.0622875	Upregulated
ftsB	Cell division protein ftsB homolog.	39.7305	85.8151	9.00749	0.104964	-3.25203	5.57e-06	0.000141152	Downregulated
ftsX	cell division protein	40.3065	11.3185	59.6318	5.26852	2.3974	1.43e-05	0.000313223	Upregulated
fur	ferric uptake regulation protein	116.37	260.121	20.5362	0.0789486	-3.66294	5.51e-16	1.06e-13	Downregulated
galF	UTP-glucose-1-phosphate uridylyltransferase	97.8387	179.206	43.5936	0.243259	-2.03943	0.00100958	0.0119613	Downregulated
gatD	galactitol-1-phosphate dehydrogenase	22.2564	6.76173	32.5861	4.8192	2.26879	0.000791433	0.00972927	Upregulated
gcl	glyoxylate carboligase	55.8525	4.30415	90.218	20.9607	4.38962	0.00151104	0.0166929	Upregulated
gcvT	Aminomethyltransferase	166.218	315.604	66.6278	0.211112	-2.24392	4.77e-07	1.71e-05	Downregulated
glgC	glucose-1-phosphate adenylyltransferase	131.116	239.494	58.8635	0.245783	-2.02455	0.000504908	0.00671159	Downregulated
glgS	glycogen synthesis protein GlgS	168.086	393.174	18.0266	0.0458488	-4.44697	1.84e-09	1.17e-07	Downregulated
glmU	UDP-N-acetylglucosamine pyrophosphorylase	137.253	259.331	55.8674	0.215429	-2.21472	7.29e-05	0.00129838	Downregulated
glnK	nitrogen regulatory protein P-II	8.62578	0.506986	14.0383	27.6897	4.79128	2.32e-06	6.73e-05	Upregulated
gloA	lactoylglutathione lyase	40.9755	87.028	10.2739	0.118053	-3.0825	0.000978768	0.0116765	Downregulated
glpA	anaerobic glycerol-3-phosphate dehydrogenase subunit A	581.548	1217.89	157.321	0.129175	-2.9526	1.83e-10	1.41e-08	Downregulated
glpC	anaerobic glycerol-3-phosphate dehydrogenase subunit C	275.57	612.241	51.1224	0.0835005	-3.58207	4.02e-20	1.88e-17	Downregulated
glpD	aerobic glycerol-3-phosphate dehydrogenase	1296.93	2877.34	243.324	0.0845657	-3.56378	0.000432588	0.00600664	Downregulated
glpT	glycerol-3-phosphate transporter	279.315	571.996	84.195	0.147195	-2.7642	1.32e-11	1.31e-09	Downregulated
gltA	citrate synthase	359.902	694.243	137.008	0.197349	-2.34118	4.29e-10	3.08e-08	Downregulated
glxK	glycerate kinase	21.4329	3.93852	33.0958	8.40312	3.07092	2.65e-14	4.22e-12	Upregulated
gmk	5'guanylate kinase	77.0382	148.263	29.5553	0.199344	-2.32667	4.75e-05	0.000890202	Downregulated
gntK	putative gluconokinase	11.0154	2.71665	16.5479	6.09129	2.60675	1.78e-06	5.48e-05	Upregulated
gpB	bacteriophage late control gene	34.5117	74.6328	7.76429	0.104033	-3.26489	0.000665765	0.00847102	Downregulated
gpJ	bacteriophage baseplate assembly protein	18.7562	1.02866	30.5746	29.7226	4.89349	5.06e-09	2.93e-07	Upregulated
gpP	replication protein P	20.1144	8.18845	28.065	3.42739	1.77711	0.000104051	0.00176294	Upregulated
gpW	bacteriophage baseplate assembly protein	8.5185	0.2388	14.0383	58.7868	5.87742	0.0130828	0.0940237	Upregulated
greB	transcription elongation factor GreB	46.1039	96.1019	12.7719	0.1329	-2.91159	0.00034276	0.00493756	Downregulated
grpE	heat shock protein GrpE (heat shock protein b25.3) (hsp24)	72.2316	133.608	31.3139	0.234372	-2.09313	0.000803356	0.00983885	Downregulated
grxC	glutaredoxin 3	33.9677	81.1548	2.50961	0.0309237	-5.01514	5.64e-05	0.00103393	Downregulated
gst	glutathione S-transferase	176.806	326.326	77.1255	0.236345	-2.08103	1.38e-05	0.00030695	Downregulated
gtgE	bacteriophage encoded virulence factor	62.7222	145.512	7.52882	0.0517401	-4.27257	1.67e-05	0.000354907	Downregulated
hemB	delta-aminolevulinic acid dehydratase	132.684	247.162	56.3655	0.228051	-2.13257	0.00010137	0.00172197	Downregulated
hha	haemolysin expression modulating protein	314.195	775.724	6.50948	0.00839149	-6.89686	0.00084007	0.010231	Downregulated
hilD	AraC-family transcriptional regulator	374.08	904.38	20.5478	0.0227203	-5.45987	7.01e-16	1.27e-13	Downregulated
himD	integration host factor beta-subunit (IHF-beta)	46.6679	109.906	4.50954	0.0410311	-4.60714	1.31e-08	6.71e-07	Downregulated
hisA	1-	33.798	4.41764	53.3849	12.0845	3.59509	0.00920722	0.0716848	Upregulated
hisD	histidinol dehydrogenase	57.0682	11.0672	87.7355	7.92751	2.98687	0.00953769	0.0734705	Upregulated
hmpA	flavohemoprotein (haemoglobin-like protein)	69.3938	11.9517	107.689	9.01034	3.17158	7.3e-06	0.000176834	Upregulated
hpaA	4-hydroxyphenylacetate 3-monooxygenase operon regulatory protein	28.933	5.4132	44.6129	8.2415	3.04291	7.52e-06	0.000180776	Upregulated
hpaC	4-hydroxyphenylacetate 3-monooxygenase coupling protein	10.7081	1.9484	16.5479	8.49307	3.08629	9.82e-08	4.17e-06	Upregulated
hpcB	3,4-dihydroxyphenylacetate 2,3-dioxygenase	16.9102	5.45407	24.5477	4.5008	2.17018	0.000454896	0.00627642	Upregulated
hpcD	5-carboxymethyl-2-hydroxymuconatedelta-isomerase	14.1751	1.61604	22.5477	13.9525	3.80245	1.69e-08	8.38e-07	Upregulated
hslS	heat shock protein B	362.051	863.442	27.7908	0.0321861	-4.95742	1.23e-07	5.06e-06	Downregulated
hslT	heat shock protein A	287.023	622.162	63.5969	0.102219	-3.29026	6.62e-07	2.3e-05	Downregulated
hslV	heat shock protein	104.376	209.431	34.339	0.163964	-2.60855	0.00337467	0.0327453	Downregulated
htpX	heat shock protein	62.2252	111.601	29.3082	0.262617	-1.92897	2.86e-05	0.000563264	Downregulated
hupA	histone like DNA-binding protein HU-alpha (NS2) (HU-2)	318.599	601.218	130.186	0.216537	-2.20731	0.00650811	0.0546381	Downregulated
hutG	formiminoglutamase	47.7682	10.3949	72.6837	6.99224	2.80576	0.00174592	0.0188421	Upregulated
hyaA	hydrogenase-1 small subunit	19.8492	3.74379	30.5862	8.16984	3.03031	1.29e-05	0.000289902	Upregulated
hycA	formate hydrogenlyase regulatory protein	5.14677	0.455983	8.27395	18.1453	4.18152	8.32e-06	0.000195627	Upregulated
imp	organic solvent tolerance protein precursor	169.924	317.304	71.6702	0.225872	-2.14642	0.00131419	0.0147677	Downregulated
invF	AraC-family regulatory protein	283.604	667.677	27.5553	0.0412704	-4.59875	3.36e-10	2.49e-08	Downregulated
invH	outer membrane lipoprotein	127.632	315.314	2.50961	0.00795906	-6.97319	3.14e-12	3.73e-10	Downregulated
iolI1	myo-inositol catabolism protein	45.8689	3.77318	73.9327	19.5943	4.29236	4.95e-05	0.00092246	Upregulated
iolR	putative transcriptional regulator	85.7586	143.377	47.3464	0.330223	-1.59849	0.00369004	0.0352304	Downregulated
iroB	putative glycosyltransferase	49.4589	6.73099	77.9442	11.5799	3.53355	0.00214205	0.0226207	Upregulated
ispB	octaprenyl-diphosphate synthase	65.6023	127.538	24.3122	0.190628	-2.39117	0.000245211	0.00361876	Downregulated
ivbL	ilvBN operon attenuator peptide	10.8012	4.08071	15.2815	3.74481	1.90489	0.00561074	0.0487955	Upregulated
katE	catalase HPII	197.73	338.347	103.986	0.307336	-1.70211	0.000842016	0.0102357	Downregulated
kdgR	transcriptional regulator KdgR	53.5534	124.473	6.27401	0.0504048	-4.31029	6.07e-06	0.000150289	Downregulated
kefB	glutathione-regulated potassium-efflux system protein (K(+)/H(+)antiporter)	75.2757	28.1013	106.725	3.79789	1.9252	2.82e-08	1.38e-06	Upregulated
lysP	lysine-specific permease	37.6263	79.0081	10.0384	0.127056	-2.97647	0.00320008	0.0313301	Downregulated
maa	maltose O-acetyltransferase	90.741	197.149	19.8026	0.100445	-3.31552	3.78e-05	0.000722606	Downregulated
malE	periplasmic maltose-binding protein	32.7316	12.6743	46.1032	3.63753	1.86296	0.00226029	0.0235762	Upregulated
manA	mannose-6-phosphate isomerase	41.6345	79.2645	16.5479	0.208768	-2.26003	1.54e-05	0.000333109	Downregulated
mdoG	Glucans biosynthesis protein G precursor.	389.508	869.728	69.3612	0.0797505	-3.64836	2.17e-21	1.29e-18	Downregulated
melR	melibiose operon regulatory protein	107.336	217.26	34.0532	0.15674	-2.67356	1.41e-05	0.000310779	Downregulated
mgsA	methylglyoxal synthase	35.5726	67.1095	14.548	0.21678	-2.2057	5.92e-05	0.0010731	Downregulated
miaB	MiaB protein (putative tRNA-thiotransferase (or tRNA-methylthiotransferase))	90.3619	148.121	51.8559	0.350092	-1.51419	0.00532738	0.0468925	Downregulated
mltD	membrane-bound lytic murein transglycosylase d precursor	133.662	230.431	69.149	0.300085	-1.73656	0.000120854	0.00198589	Downregulated
mraZ	conserved hypothetical protein.	49.0622	95.6157	18.0266	0.188532	-2.40712	0.000735969	0.00922076	Downregulated
mscL	large-conductance mechanosensitive channel	187.517	419.148	33.0958	0.0789597	-3.66274	0.00725927	0.0591965	Downregulated
msyB	acidic protein MsyB; multicopy suppressor of SecY	58.3634	107.593	25.5438	0.237412	-2.07454	0.000187425	0.00289778	Downregulated
mtlA	mannitol-specific enzyme II of phosphotransferase system	73.4018	31.2957	101.473	3.24238	1.69705	7.02e-12	7.52e-10	Upregulated
mukB	cell division protein	185.576	33.6207	286.88	8.53283	3.09302	1.21e-05	0.000274081	Upregulated
murC	UDP-N-acetylmuramate--L-alanine ligase	52.5031	22.2321	72.6837	3.26932	1.70899	0.00408525	0.0381355	Upregulated
murE	UDP-N-acetylmuramoylalanyl-D-glutamate--2,6-dia minopimelate ligase	74.2534	18.3437	111.526	6.07982	2.60403	0.0023512	0.024369	Upregulated
murG	UDP-N-acetylglucosamine--N-acetylmuramyl-	48.2873	8.27272	74.9636	9.06154	3.17976	0.0139189	0.0983038	Upregulated
nam	pyrazinamidase/nicotinamidase	17.1437	6.39086	24.3122	3.80421	1.9276	2.25e-05	0.000454771	Upregulated
napH	ferredoxin-type protein NapH	19.6891	3.34337	30.5862	9.14831	3.19351	0.00645258	0.0543113	Upregulated
narH	respiratory nitrate reductase 1 beta chain	29.0349	5.33197	44.8368	8.40905	3.07194	3.54e-11	3.17e-09	Upregulated
narK	nitrite extrusion protein (nitrite facilitator)	41.7449	5.09232	66.18	12.996	3.7	0.005071	0.0451216	Upregulated
nfnB	oxygen-insensitive NAD(P)H nitroreductase	71.2917	127.141	34.059	0.267884	-1.90032	0.000295373	0.00430232	Downregulated
nifU	NifU-like protein	17.1037	34.1126	5.76435	0.16898	-2.56508	0.000427736	0.00596459	Downregulated
nirB	nitrite reductase large subunit	112.049	10.2272	179.93	17.5933	4.13695	6.87e-06	0.000167605	Upregulated
nrdH	putative glutaredoxin	10.6799	3.76001	15.2931	4.06731	2.02407	0.000150082	0.00242355	Upregulated
nrfB	penta-heme cytochrome c , subunit of nitrite reductase complex	20.0497	6.53847	29.0572	4.44404	2.15187	0.000122647	0.0020103	Upregulated
ntpA	DATP pyrophosphohydrolase	22.5006	9.28062	31.3139	3.37412	1.75451	0.000238432	0.00353593	Upregulated
nuoA	NADH dehydrogenase I chain A	135.438	288.951	33.0958	0.114538	-3.1261	0.00804134	0.0639785	Downregulated
nuoL	NADH dehydrogenase I chain L	99.2033	38.3026	139.804	3.64998	1.86789	0.0113002	0.0833185	Upregulated
oadB2	oxaloacetate decarboxylase beta chain 2	63.187	1.46692	104.334	71.1246	6.15228	0.0105422	0.0786154	Upregulated
oadG2	oxaloacetate decarboxylase gamma chain (ec 4.1.1.3)	14.2714	1.46303	22.8103	15.5911	3.96265	1.97e-12	2.48e-10	Upregulated
ompD	outer membrane protein	773.083	1770.8	107.936	0.0609529	-4.03616	2e-33	2.61e-30	Downregulated
ompF	outer membrane protein F precursor	249.359	578.637	29.8411	0.0515714	-4.27729	0.00306134	0.0302434	Downregulated
ompR	two-component response regulator OmpR	67.0554	119.894	31.8294	0.265479	-1.91333	0.0124221	0.0899675	Downregulated
oppA	periplasmic oligopeptide-binding protein precursor (OppA)	131.086	233.438	62.8518	0.269244	-1.89301	6.21e-10	4.37e-08	Downregulated
osmB	osmotically inducible lipoprotein B precursor	28.0478	47.1973	15.2815	0.323779	-1.62692	0.000905212	0.0109026	Downregulated
osmC	osmotically inducible protein C	48.1068	79.7159	27.0341	0.33913	-1.56009	0.000998731	0.0118543	Downregulated
osmY	Putative periplasmic protein	99.2012	196.15	34.5687	0.176236	-2.50442	2.8e-05	0.000553777	Downregulated
parA	plasmid partition protein	59.933	135.539	9.52876	0.0703025	-3.83028	3.15e-08	1.51e-06	Downregulated
pckA	phosphoenolpyruvate carboxykinase	301.623	612.731	94.2179	0.153767	-2.70118	2.82e-16	5.94e-14	Downregulated
pduA	putative propanediol utilization protein	11.5745	0.350094	19.0575	54.4354	5.76647	0.00725921	0.0591965	Upregulated
pduH	Propanediol utilization protein	9.28962	0.284398	15.2931	53.7735	5.74882	0.00996489	0.0756037	Upregulated
pduU	putative propanediol utilization protein PduU	15.5044	0.410385	25.567	62.3	5.96116	9.47e-18	3.1e-15	Upregulated
pduV	putative propanediol utilization protein PduV	17.3765	0.561873	28.5863	50.8767	5.66893	0.00533751	0.0469184	Upregulated
pflA	pyruvate formate-lyase 1 activating enzyme	80.9373	175.639	17.8027	0.10136	-3.30245	0.000200336	0.00306838	Downregulated
phoH	PhoH protein (phosphate starvation-inducible protein PsiH)	66.7679	109.093	38.5512	0.353379	-1.50071	1.18e-09	7.79e-08	Downregulated
phsB	thiosulfate reductase electron transport protein PhsB	27.783	10.0495	39.6053	3.94101	1.97856	6.31e-09	3.5e-07	Upregulated
pilM	pilus protein	7.10785	2.35879	10.2739	4.35558	2.12287	0.00961855	0.073746	Upregulated
pipC	cell invasion protein	67.8442	167.728	1.2548	0.00748117	-7.06252	0.000108295	0.00181603	Downregulated
pocR	pdu/cob regulatory protein PocR	67.0032	142.333	16.7834	0.117916	-3.08417	0.00387334	0.0368729	Downregulated
potH	putrescine transport system permease protein PotH	25.9586	7.01759	38.586	5.49847	2.45903	1.63e-08	8.15e-07	Upregulated
ppdD	prepilin peptidase dependent protein D precursor	8.89937	1.19096	14.0383	11.7874	3.55917	0.000464656	0.00637075	Upregulated
ppiA	peptidyl-prolyl cis-trans isomerase	40.1185	79.2388	14.0383	0.177165	-2.49684	0.0122641	0.0891189	Downregulated
ppk	Polyphosphate kinase	117.336	227.931	43.6052	0.191308	-2.38603	1.44e-05	0.000313726	Downregulated
prgH	type III secretion apparatus component	382.72	920.333	24.3122	0.0264167	-5.2424	9.11e-08	3.95e-06	Downregulated
priB	primosomal replication protein N	59.0677	114.983	21.791	0.189515	-2.39962	0.00113629	0.0130604	Downregulated
proB	glutamate 5-kinase	47.2674	18.6207	66.3652	3.56406	1.83352	4.77e-06	0.000123199	Upregulated
prpE	PrpE protein	57.5107	9.92051	89.2374	8.99524	3.16916	0.00922432	0.0717325	Upregulated
psiB	plasmid SOS inhibition protein	18.302	3.64871	28.0708	7.69334	2.94361	8.28e-10	5.64e-08	Upregulated
pSLP2_intergenic_65663_65956	pSLP2_intergenic_65663_65956	23.4615	51.8894	4.50954	0.0869069	-3.52439	0.0122826	0.0891547	Downregulated
pSLP2_intergenic_84744_84896	pSLP2_intergenic_84744_84896	2.51771	0.647666	3.76441	5.81227	2.5391	0.007635	0.0615696	Upregulated
pSLT1344_intergenic_25316_25610	pSLT1344_intergenic_25316_25610	4.47946	1.78762	6.27401	3.50969	1.81135	0.00299031	0.0296762	Upregulated
pSLT1344_intergenic_54221_54378	pSLT1344_intergenic_54221_54378	17.2222	0.587374	28.3121	48.2011	5.59099	1.04e-16	2.71e-14	Upregulated
pSLT1344_intergenic_80324_80561	pSLT1344_intergenic_80324_80561	8.66747	1.37572	13.5286	9.83386	3.29776	0.000117852	0.00195561	Upregulated
pSLT1344_intergenic_90163_91002	pSLT1344_intergenic_90163_91002	25.8146	5.53986	39.3311	7.09965	2.82775	3.32e-09	2.01e-07	Upregulated
pssA	CDP-diacylglycerol-serineO-phosphatidyltransferase	68.7405	116.972	36.586	0.312776	-1.6768	0.00488383	0.0436939	Downregulated
pstC	phosphate transport system permease protein	43.701	10.8225	65.62	6.06329	2.6001	0.00299011	0.0296762	Upregulated
ptsG	PTS system, glucose-specific IIbc component	45.6687	7.43101	71.1605	9.57615	3.25945	4.97e-05	0.000923343	Upregulated
purU	formyltetrahydrofolate deformylase	118.404	252.785	28.8159	0.113994	-3.13297	3.92e-08	1.82e-06	Downregulated
pyrG	CTP synthase	250.382	566.564	39.5937	0.0698839	-3.8389	1.57e-25	1.28e-22	Downregulated
ramA	transcriptional activator RamA	57.4161	125.13	12.2738	0.098089	-3.34976	0.00930352	0.0722625	Downregulated
rcsF	RcsF protein	63.5829	134.135	16.5479	0.123367	-3.01897	1.89e-05	0.000388108	Downregulated
recG	ATP-dependent DNA helicase	78.2068	16.9167	119.067	7.03844	2.81526	0.00819497	0.0648066	Upregulated
recR	recombination protein RecR	33.0965	12.0576	47.1225	3.90813	1.96648	0.00023394	0.00348512	Upregulated
relB	antitoxin protein	7.81164	17.6469	1.2548	0.0711061	-3.81388	0.00723127	0.0591156	Downregulated
repA2	DNA replication	261.969	597.396	38.3505	0.0641961	-3.96137	1.44e-25	1.28e-22	Downregulated
rfaH	transcriptional activator	94.6298	212.517	16.0382	0.075468	-3.72799	0	0	Downregulated
rfaQ	lipopolysaccharide core biosynthesis protein	48.9593	97.2405	16.7718	0.172477	-2.53552	0.000170613	0.00268869	Downregulated
rfbB	dTDP-glucose 4,6-dehydratase	55.3306	113.505	16.5479	0.145791	-2.77803	0.00415465	0.038541	Downregulated
rfc	O-antigen polymerase	484.733	954.517	171.544	0.179718	-2.47619	3.23e-12	3.77e-10	Downregulated
rhaT	L rhamnose-proton symporter	37.5152	12.9694	53.8791	4.15434	2.05462	0.000404097	0.00568342	Upregulated
rho	transcription termination factor	1118.94	2559.26	158.726	0.0620202	-4.01112	9.46e-06	0.000220518	Downregulated
ribA	GTP cyclohydrolase II	44.6444	94.318	11.5287	0.122232	-3.0323	0.00119022	0.013561	Downregulated
ribB	3,4-dihydroxy-2-butanone 4-phosphate synthase	56.222	115.75	16.5363	0.142862	-2.80731	0.000365509	0.00519188	Downregulated
rimJ	ribosomal-protein-alanine acetyltransferase	19.3476	46.4868	1.2548	0.0269926	-5.21129	0.00559369	0.048712	Downregulated
rnpA	RNase P, protein component	99.1356	232.428	10.2739	0.0442025	-4.49973	5.73e-09	3.21e-07	Downregulated
rpiA	Ribose-5-phosphate isomerase A	81.2909	143.854	39.5821	0.275154	-1.86169	0.000571628	0.00743229	Downregulated
rpl32	50S ribosomal protein L32. Chloroplast 50S ribosomal protein L32.	38.8117	69.9806	18.0324	0.257677	-1.95637	0.00970546	0.0743252	Downregulated
rplM	50S ribosomal subunit protein L13	187.943	400.385	46.3155	0.115677	-3.11182	3.29e-22	2.39e-19	Downregulated
rplU	50S ribosomal subunit protein L21	180.094	385.98	42.8368	0.110982	-3.1716	1.99e-06	6.01e-05	Downregulated
rplX	50S ribosomal subunit protein L24	88.0127	148.676	47.5703	0.319959	-1.64404	0.00601422	0.051483	Downregulated
rpmH	50s ribosomal protein l34	89.4413	198.437	16.7776	0.0845487	-3.56407	2.21e-06	6.58e-05	Downregulated
rpoE	RNA polymerase sigma-E factor (sigma-24)	154.749	311.771	50.0683	0.160593	-2.63852	0.00985428	0.0752007	Downregulated
rpoH	RNA polymerase sigma-32 factor	192.776	369.268	75.114	0.203413	-2.29752	0.00121266	0.0137688	Downregulated
rppH	RNA pyrophosphohydrolase	36.5966	69.3336	14.7718	0.213054	-2.23071	0.00978578	0.0747652	Downregulated
rps16	30S ribosomal protein S16. Chloroplast 30S ribosomal protein S16.	121.654	261.709	28.2831	0.108071	-3.20996	5.16e-16	1.02e-13	Downregulated
rpsG	30S ribosomal subunit protein S7	102.459	185.909	46.8251	0.251871	-1.98924	0.0106179	0.0790583	Downregulated
rpsL	30S ribosomal subunit protein S12	235.42	508.53	53.3462	0.104903	-3.25288	1.17e-20	6.4e-18	Downregulated
rpsU	30S ribosomal subunit protein S21	26.1646	63.5293	1.2548	0.0197516	-5.66189	0.00115629	0.013251	Downregulated
rseA	sigma-E factor negative regulatory protein	234.849	508.256	52.5779	0.103448	-3.27303	0.00115693	0.013251	Downregulated
rseB	sigma-E factor regulatory protein RseB precursor	75.603	152.203	24.5361	0.161206	-2.63303	0.0118909	0.0867928	Downregulated
rspA	starvation sensing protein RspA	12.6216	2.96778	19.0575	6.42148	2.68291	4.76e-08	2.15e-06	Upregulated
ruvC	Crossover junction endodeoxyribonuclease ruvC	7.44018	3.54282	10.0384	2.83345	1.50256	0.000535362	0.00704481	Upregulated
safC	salmonella atypical fimbria outer membrane usher	64.804	21.76	93.4999	4.29686	2.10328	0.0142518	0.0996862	Upregulated
samB	putative transposase	295.764	555.744	122.445	0.220326	-2.18229	0.00153687	0.0169271	Downregulated
sapF	peptide transport system ATP-binding protein SapF	35.3028	13.4556	49.8676	3.70609	1.8899	1.34e-08	6.81e-07	Upregulated
sciI	conserved hypothetical protein (SPI-6 associated)	25.7158	8.64595	37.0957	4.29053	2.10115	0.00246906	0.0255501	Upregulated
sciK1	conserved hypothetical protein (SPI-6 associated)	9.19923	1.94063	14.0383	7.23388	2.85477	0.00250583	0.0258896	Upregulated
sciX	conserved hypothetical protein (SPI-6 associated)	50.6614	108.243	12.2738	0.113392	-3.14061	0.00644135	0.0543113	Downregulated
sdaA	L-serine deaminase 1	75.9872	138.124	34.5629	0.250231	-1.99867	0.0107319	0.079577	Downregulated
sdaC	putative serine transporter	361.704	722.133	121.418	0.168138	-2.57228	0.0126496	0.0914126	Downregulated
sdhB	succinate dehydrogenase iron-sulfur protein	53.6138	94.5838	26.3005	0.278066	-1.8465	0.00591355	0.0508208	Downregulated
sdhC	succinate dehydrogenase cytochrome b-556 subunit	163.992	383.293	17.7911	0.0464165	-4.42922	1.25e-16	3.03e-14	Downregulated
sdiA	cell-division regulatory protein	45.071	75.8561	24.5477	0.323608	-1.62768	3.97e-06	0.000104652	Downregulated
secE	preprotein translocase SecE subunit	40.0381	74.9201	16.7834	0.224017	-2.15832	0.00801744	0.0638718	Downregulated
sfsA	Sugar fermentation stimulation protein homolog.	47.734	97.5131	14.548	0.14919	-2.74478	0.00972747	0.0744066	Downregulated
sgaA	probable sugar phosphotransferase	7.53519	1.54494	11.5287	7.46223	2.89961	0.000189698	0.002926	Upregulated
sicP	chaperone (associated with virulence)	95.9988	234.35	3.76441	0.0160632	-5.9601	1.9e-06	5.74e-05	Downregulated
sigD	cell invasion protein	522.307	1265.18	27.0573	0.0213861	-5.54719	9.53e-06	0.000221085	Downregulated
sinR	LysR-family transcriptional regulator (SPI-6 associated)	68.4127	135.328	23.8025	0.175888	-2.50727	0.00988605	0.0752636	Downregulated
sipA	pathogenicity island 1 effector protein	360.731	855.948	30.5862	0.0357337	-4.80657	0.000874389	0.0105702	Downregulated
sipB	pathogenicity island 1 effector protein	303.153	702.239	37.0957	0.0528249	-4.24264	0.00127522	0.0143545	Downregulated
sipC	pathogenicity island 1 effector protein	371.271	865.434	41.8291	0.0483331	-4.37084	2.59e-06	7.34e-05	Downregulated
sirA	invasion response-regulator	68.1633	147.115	15.5286	0.105554	-3.24395	4.97e-09	2.9e-07	Downregulated
SL0155	probable secreted protein	7.34853	0.313784	12.0384	38.3651	5.26172	0.000496656	0.00664239	Upregulated
SL0160	HNH endonuclease	280.491	618.191	55.3577	0.0895479	-3.4812	1.82e-05	0.000379577	Downregulated
SL0161	conserved hypothetical protein	57.2559	124.729	12.2738	0.0984039	-3.34514	6.83e-08	3.02e-06	Downregulated
SL0234	putative secreted chitinase	44.159	14.1681	64.153	4.52799	2.17887	4.33e-07	1.57e-05	Upregulated
SL0286A	conserved hypothetical protein (SPI-6 associated)	31.2717	74.4148	2.50961	0.0337245	-4.89006	4.06e-05	0.000770271	Downregulated
SL0294	transposase (pseudogene)	1.55832	0.131391	2.50961	19.1003	4.25552	0.00521225	0.0460028	Upregulated
SL0326	putative fumarylacetoacetate (faa) hydrolase	19.5083	6.30271	28.3121	4.49205	2.16737	1.82e-05	0.000379577	Upregulated
SL0339	possible transmembrane regulator	68.1443	129.792	27.0457	0.208376	-2.26274	0.000240313	0.00355576	Downregulated
SL0361	probable secreted protein	46.2035	109.862	3.76441	0.0342648	-4.86713	0.00112986	0.0130093	Downregulated
SL0397	probable peroxidase	808.212	1749.07	180.976	0.10347	-3.27271	0.00713822	0.0585746	Downregulated
SL0448	conserved hypothetical protein	16.6492	39.7408	1.2548	0.0315747	-4.98509	0.0106257	0.0790583	Downregulated
SL0464	putative membrane protein	60.9566	111.823	27.0457	0.241861	-2.04775	0.000634133	0.00811591	Downregulated
SL0555	conserved hypothetical protein	78.7051	130.237	44.3503	0.340535	-1.55413	0.012813	0.0924915	Downregulated
SL0565	putative protein	13.5137	2.19801	21.0575	9.58024	3.26006	2.14e-09	1.32e-07	Upregulated
SL0600	molybdopterin-containing oxidoreductase iron-sulfur subunit	9.00096	3.32716	12.7835	3.84217	1.94192	0.00180292	0.0193614	Upregulated
SL0656	haemolysin-related protein	55.5581	98.3268	27.0457	0.275059	-1.86219	0.010252	0.0770671	Downregulated
SL0736	putative exported protein	61.7381	146.816	5.01921	0.034187	-4.87041	0.000153086	0.00245771	Downregulated
SL0747	ABC transporter permease (FecCD_family)	24.4428	4.34586	37.8408	8.70733	3.12223	6.52e-09	3.58e-07	Upregulated
SL0792	putative inner membrane protein	33.195	14.186	45.8677	3.23331	1.69301	3.89e-08	1.82e-06	Upregulated
SL0818	conserved hypothetical protein	53.0181	123.134	6.27401	0.0509527	-4.2947	1.36e-05	0.000303255	Downregulated
SL0829	conserved hypothetical protein	469.049	1063.68	72.6276	0.0682794	-3.87241	1.79e-07	7.07e-06	Downregulated
SL0836	putative inner membrane protein	71.9599	170.489	6.27401	0.0368002	-4.76414	0.00475097	0.0427391	Downregulated
SL0868	probable lipoprotein	220.923	527.502	16.5363	0.0313483	-4.99547	1.53e-29	1.66e-26	Downregulated
SL0876	prismane protein homolog (hybrid-cluster protein)	65.361	19.4811	95.9476	4.92515	2.30017	0.00954916	0.0734723	Upregulated
SL0892	inner membrane protein	92.0363	186.531	29.0398	0.155683	-2.68331	0.00858844	0.0675913	Downregulated
SL0924	conserved hypothetical protein	38.4255	77.6704	12.2622	0.157875	-2.66314	0.000182609	0.00283	Downregulated
SL0933	putative exported protein	152.878	333.325	32.5803	0.0977434	-3.35486	1.14e-12	1.49e-10	Downregulated
SL0944	predicted bacteriophage protein	7.99192	0.804558	12.7835	15.8889	3.98994	4.22e-07	1.54e-05	Upregulated
SL0945	predicted bacteriophage protein	23.3323	2.68726	37.0957	13.8043	3.78704	3.87e-17	1.15e-14	Upregulated
SL0949	predicted bacteriophage protein	7.88304	1.29685	12.2738	9.46434	3.2425	0.000748961	0.00934772	Upregulated
SL0976	predicted bacteriophage protein	5.90206	1.57973	8.78362	5.56021	2.47514	2.35e-05	0.00047322	Upregulated
SL0979	predicted bacteriophage protein	3.23195	0.551065	5.01921	9.10821	3.18717	0.000365732	0.00519188	Upregulated
SL0989	bacteriophage tail fibre assembly protein	11.6287	3.8968	16.7834	4.30696	2.10667	0.0045425	0.041161	Upregulated
SL1019	conserved hypothetical protein	46.4257	98.7887	11.5171	0.116583	-3.10057	2.59e-05	0.000514735	Downregulated
SL1031	conserved hypothetical protein	298.843	697.928	32.7868	0.0469774	-4.41189	0.00801816	0.0638718	Downregulated
SL1032	hypothetical protein	121.966	262.483	28.2889	0.107774	-3.21392	0.00403948	0.0379705	Downregulated
SL1048	hypothetical protein	22.9317	7.33222	33.3313	4.54587	2.18456	1.89e-07	7.36e-06	Upregulated
SL1059	conserved hypothetical protein	101.504	197.779	37.3196	0.188693	-2.40589	0.0107754	0.0798085	Downregulated
SL1065	putative transcriptional regulator	187.036	396.587	47.3348	0.119355	-3.06666	6.5e-16	1.21e-13	Downregulated
SL1067	conserved hypothetical protein	17.6327	7.96671	24.0767	3.02217	1.59558	2.57e-06	7.34e-05	Upregulated
SL1094	Hypothetical UPF0312 protein <ORFName> precursor.	23.2524	10.0163	32.0765	3.20244	1.67917	0.000192635	0.00296432	Upregulated
SL1098	conserved hypothetical protein	111.332	274.565	2.50961	0.00914028	-6.77355	3.39e-12	3.89e-10	Downregulated
SL1127	conserved hypothetical protein	81.1421	169.051	22.5361	0.133309	-2.90715	1.34e-07	5.41e-06	Downregulated
SL1147	conserved hypothetical protein	106.63	253.047	9.01909	0.035642	-4.81028	1.11e-09	7.39e-08	Downregulated
SL1149	putative secreted protein	60.6511	126.823	16.5363	0.130388	-2.93911	0.000472223	0.00644747	Downregulated
SL1150	putative TetR-family regulatory protein	357.086	872.775	13.2932	0.0152309	-6.03685	2.67e-17	8.32e-15	Downregulated
SL1151	putative secreted protein	95.0506	197.075	27.0341	0.137176	-2.8659	1.01e-13	1.41e-11	Downregulated
SL1166	putative transposase	16.0615	6.33209	22.5477	3.56087	1.83223	0.00147893	0.0163935	Upregulated
SL1177	predicted bacteriophage protein	55.8741	134.803	3.25474	0.0241444	-5.37217	2.01e-09	1.25e-07	Downregulated
SL1195	putative ABC transport ATP-binding subunit	14.1897	5.77022	19.8026	3.43187	1.779	0.000173656	0.00271052	Upregulated
SL1213	predicted bacteriophage protein	48.2193	101.373	12.7835	0.126104	-2.98732	0.000366766	0.00519188	Downregulated
SL1218	conserved hypothetical membrane protein	125.027	254.705	38.5744	0.151447	-2.72312	8.09e-09	4.3e-07	Downregulated
SL1220	conserved hypothetical protein	305.233	668.822	62.8402	0.0939565	-3.41186	0.00335784	0.0326305	Downregulated
SL1231	putative nitroreductase	36.7577	67.8368	16.0382	0.236424	-2.08055	4.27e-06	0.000111371	Downregulated
SL1235	putative exported protein	54.0717	129.533	3.76441	0.0290614	-5.10475	9.65e-08	4.13e-06	Downregulated
SL1236	putative MutT-family protein	25.7274	60.5541	2.50961	0.041444	-4.59269	0.0020014	0.0212142	Downregulated
SL1262	putative outer membrane protein	48.2662	93.6083	18.0382	0.192698	-2.37558	0.00221851	0.0231774	Downregulated
SL1300	conserved hypothetical protein	190.609	440.837	23.7909	0.0539676	-4.21176	2.38e-19	1.04e-16	Downregulated
SL1306	conserved hypothetical protein	41.0384	12.7544	59.8944	4.69599	2.23143	0.0137986	0.0976651	Upregulated
SL1322	conserved hypothetical protein	111.027	239.234	25.5554	0.106822	-3.22672	2.28e-06	6.73e-05	Downregulated
SL1364	putative secreted protein	266.293	592.831	48.6012	0.0819815	-3.60856	1.59e-06	5.03e-05	Downregulated
SL1392	putative membrane protein	40.1338	84.9237	10.2739	0.120978	-3.04718	0.000873967	0.0105702	Downregulated
SL1393	conserved hypothetical protein	61.4333	130.661	15.2815	0.116955	-3.09597	5.57e-05	0.00102277	Downregulated
SL1403	conserved hypothetical protein	31.2178	5.10786	48.6244	9.51952	3.25089	0	0	Upregulated
SL1430	putative exported protein	33.6235	64.8836	12.7835	0.197022	-2.34357	3.12e-06	8.51e-05	Downregulated
SL1433	putative secreted protein	49.2496	109.613	9.00749	0.0821756	-3.60515	2.89e-11	2.65e-09	Downregulated
SL1439	conserved hypothetical protein	48.1101	104.864	10.2739	0.0979731	-3.35147	0.000772406	0.0095673	Downregulated
SL1478	conserved hypothetical protein	37.2733	69.8905	15.5286	0.222184	-2.17017	0.0103335	0.0775012	Downregulated
SL1480	plasmid stability protein	42.1818	82.179	15.517	0.188819	-2.40492	2.2e-05	0.000445664	Downregulated
SL1482	conserved hypothetical protein	23.4032	54.7435	2.50961	0.045843	-4.44716	0.0044706	0.040671	Downregulated
SL1523	conserved hypothetical protein	28.9333	64.8045	5.01921	0.0774515	-3.69056	3.43e-06	9.11e-05	Downregulated
SL1537	putative lipoprotein	78.3361	143.608	34.8216	0.242477	-2.04408	2.03e-06	6.09e-05	Downregulated
SL1544	putative phosphotransferase enzyme	27.2747	7.66981	40.3446	5.26019	2.39511	0.00613662	0.0523867	Upregulated
SL1547	putative ribulose-5-phosphate 3-epimerase	28.2118	12.6681	38.5744	3.04501	1.60645	0.000558128	0.00730407	Upregulated
SL1565	ABC transporter ATP-binding subunit	23.2418	10.3603	31.8294	3.07225	1.6193	1.63e-05	0.000351152	Upregulated
SL1568	possible methyltransferase	93.7804	206.629	18.5478	0.0897639	-3.47772	1.29e-07	5.25e-06	Downregulated
SL1582	conserved hypothetical protein	521.995	1271.95	22.0265	0.0173171	-5.85166	0.00282401	0.0285898	Downregulated
SL1584	putative integrase/transposase (remnant)	43.2642	101.396	4.50954	0.0444745	-4.49088	0.000364638	0.00519188	Downregulated
SL1585	conserved hypothetical protein	57.3324	113.627	19.8026	0.174278	-2.52054	0.00269003	0.0274458	Downregulated
SL1589	conserved hypothetical protein	29.4475	56.3258	11.5287	0.204679	-2.28857	4.1e-05	0.000774285	Downregulated
SL1593	putative membrane protein	39.8706	88.0388	7.75849	0.0881258	-3.50429	2.19e-06	6.53e-05	Downregulated
SL1594	putative membrane protein	45.3324	91.1558	14.7834	0.162178	-2.62435	0.000296866	0.00431445	Downregulated
SL1636	putative regulatory protein	61.2026	135.714	11.5287	0.0849488	-3.55726	2.76e-05	0.00054745	Downregulated
SL1647	conserved hypothetical protein	16.0849	26.701	9.00749	0.337346	-1.5677	0.00165029	0.0179881	Downregulated
SL1663	putative outer membrane protein	146.691	330.258	24.3122	0.0736157	-3.76384	5.71e-11	4.85e-09	Downregulated
SL1669	conserved hypothetical protein	12.5959	25.8431	3.76441	0.145664	-2.77929	0.00722795	0.0591156	Downregulated
SL1671	conserved hypothetical protein	30.9812	68.042	6.27401	0.0922079	-3.43897	9.39e-05	0.00161661	Downregulated
SL1686	Hypothetical UPF0225 protein.	49.664	96.3643	18.5304	0.192296	-2.3786	0.000590159	0.00759309	Downregulated
SL1710	putative exported protein	100.438	230.054	14.0267	0.0609714	-4.03572	1.72e-05	0.000364582	Downregulated
SL1732	conserved hypothetical protein	281.525	620.457	55.57	0.0895631	-3.48095	0.00757222	0.0612142	Downregulated
SL1737	conserved hypothetical protein	21.0728	50.7998	1.2548	0.024701	-5.33929	0.00518111	0.0457898	Downregulated
SL1741	conserved hypothetical protein	41.3522	99.616	2.50961	0.0251928	-5.31084	0.00119499	0.0135917	Downregulated
SL1752	hypothetical protein	29.8135	61.0052	9.01909	0.147841	-2.75788	0.0079755	0.0638431	Downregulated
SL1767	conserved hypothetical protein	180.745	359.468	61.597	0.171356	-2.54493	3.28e-05	0.000636635	Downregulated
SL1768	putative exported protein	98.5157	194.074	34.81	0.179364	-2.47904	0.00412416	0.0384217	Downregulated
SL1786	hypothetical protein	50.8026	107.849	12.7719	0.118424	-3.07796	0.00107967	0.0125418	Downregulated
SL1846	conserved hypothetical protein	18.5663	6.18297	26.8218	4.33801	2.11703	3.06e-06	8.39e-05	Upregulated
SL1933	putative bacteriophage protein	16.4367	2.74131	25.567	9.32658	3.22135	0.00229922	0.0239061	Upregulated
SL1934	predicted bacteriophage protein	12.6207	2.61228	19.293	7.3855	2.8847	9.47e-06	0.000220518	Upregulated
SL1939	predicted bacteriophage protein	7.3917	2.3039	10.7836	4.68057	2.22668	0.00022172	0.00337221	Upregulated
SL1945	predicted bacteriophage protein	11.3073	1.21106	18.0382	14.8946	3.89671	0.000137117	0.00222518	Upregulated
SL1946	predicted bacteriophage protein	11.7721	0.490773	19.293	39.3114	5.29688	2.87e-11	2.65e-09	Upregulated
SL1948	putative peptidase	6.7598	0.724169	10.7836	14.8909	3.89636	2.08e-07	8.02e-06	Upregulated
SL1949	putative portal protein	19.204	2.13079	30.5862	14.3544	3.84342	2.07e-16	4.68e-14	Upregulated
SL1967	predicted bacteriophage protein	66.8384	140.039	18.0382	0.128808	-2.9567	0.00690786	0.0570421	Downregulated
SL1970	predicted bacteriophage protein	12.9099	4.46171	18.542	4.15581	2.05513	0.000470172	0.00643289	Upregulated
SL1977	conserved hypothetical protein	160.34	364.028	24.5477	0.0674334	-3.89039	0.00353909	0.0341381	Downregulated
SL1980	hypothetical protein	10.4896	0.284398	17.293	60.8057	5.92613	0.00678721	0.0563304	Upregulated
SL1987	conserved hypothetical protein	38.561	79.1268	11.5171	0.145552	-2.78039	0.00110067	0.0127405	Downregulated
SL2154	FAA-hydrolase-family protein	20.7849	3.08296	32.5861	10.5698	3.40187	6.2e-14	9.21e-12	Upregulated
SL2190	putative membrane protein	55.285	103.626	23.0574	0.222505	-2.16809	0.00447132	0.040671	Downregulated
SL2191	putative lipoprotein	94.4137	200.348	23.7909	0.118748	-3.07402	0.000475594	0.00646658	Downregulated
SL2269	conserved hypothetical protein	34.6765	10.7984	50.5953	4.68546	2.22819	0.0141553	0.0993301	Upregulated
SL2271	putative inner membrane protein	31.9758	8.13812	47.8677	5.8819	2.55628	0.00746623	0.0605821	Upregulated
SL2300	putative aminotransferase	122.201	252.522	35.3196	0.139867	-2.83787	1.89e-06	5.74e-05	Downregulated
SL2305	conserved hypothetical protein	38.945	86.0693	7.52882	0.087474	-3.515	0.00317723	0.031153	Downregulated
SL2309	putative transketolase C-terminal section	30.1456	4.34434	47.3464	10.8984	3.44604	0.000429815	0.00598082	Upregulated
SL2310	putative transketolase N-terminal section	24.5343	7.23865	36.0648	4.98225	2.3168	1.7e-05	0.000361654	Upregulated
SL2312	putative sugar phosphotransferase component II B	13.8817	5.76481	19.293	3.34668	1.74273	0.0029021	0.0290825	Upregulated
SL2359	conserved hypothetical protein	37.0958	80.3372	8.26815	0.102918	-3.28043	3.74e-09	2.22e-07	Downregulated
SL2370	putative aminotransferase	108.668	196.868	49.8676	0.253305	-1.98105	0.00278154	0.0282473	Downregulated
SL2434	transposase	13.1826	5.89924	18.0382	3.05771	1.61245	0.0112773	0.0833185	Upregulated
SL2467	hypothetical protein	172.114	395.716	23.0458	0.0582382	-4.10189	2.31e-06	6.73e-05	Downregulated
SL2468	conserved hypothetical inner membrane protein	172.331	396.259	23.0458	0.0581585	-4.10387	3e-06	8.24e-05	Downregulated
SL2533	putative phophosugar binding protein	29.7408	7.43253	44.6129	6.00238	2.58554	0.00463122	0.0418345	Upregulated
SL2551	predicted bacteriophage protein	12.1658	4.47489	17.293	3.86446	1.95027	0.000504898	0.00671159	Upregulated
SL2552A	predicted bacteriophage protein	6.87852	0.667763	11.019	16.5014	4.04452	0.000686698	0.0087035	Upregulated
SL2565	predicted bacteriophage protein	6.87662	1.7807	10.2739	5.76958	2.52847	0.00315168	0.0309954	Upregulated
SL2573	putative DNA packaging protein	10.5391	2.30778	16.0266	6.9446	2.79589	0.00154908	0.0169983	Upregulated
SL2576	bacteriophage lysozyme	11.22	5.11022	15.2931	2.99265	1.58142	0.00133737	0.0149767	Upregulated
SL2579	putative antitermination protein	17.0325	4.23068	25.567	6.04323	2.59532	4.11e-08	1.89e-06	Upregulated
SL2589	putative bacteriophage protein	8.31746	1.6184	12.7835	7.89883	2.98164	3.03e-05	0.000592857	Upregulated
SL2593	putative DNA-binding protein	180.833	420.16	21.2813	0.0506505	-4.30328	9.27e-07	3.12e-05	Downregulated
SL2594	predicted bacteriophage protein	1210.02	2919.15	70.6044	0.0241867	-5.36964	8.46e-11	6.91e-09	Downregulated
SL2597A	predicted bacteriophage protein	12.9472	3.78162	19.0575	5.03951	2.33328	5.95e-07	2.1e-05	Upregulated
SL2623	putative lipoprotein	70.3219	135.236	27.0457	0.199988	-2.32201	2.13e-05	0.000434407	Downregulated
SL2626	conserved hypothetical protein	42.6076	15.9883	60.3538	3.77487	1.91643	3.99e-06	0.000104917	Upregulated
SL2634	predicted bacteriophage protein	5.22344	0.647666	8.27395	12.775	3.67526	4.05e-05	0.000769176	Upregulated
SL2638	predicted bacteriophage protein	5.90362	1.58361	8.78362	5.54657	2.47159	2.56e-05	0.00051073	Upregulated
SL2644	predicted bacteriophage protein	242.954	597.975	6.27401	0.0104921	-6.57455	5.92e-05	0.0010731	Downregulated
SL2659	conserved hypothetical protein	95.9834	236.194	2.50961	0.0106252	-6.55637	5.74e-09	3.21e-07	Downregulated
SL2671	probable major tail tube protein	15.9706	0.811482	26.0767	32.1346	5.00606	0.0133781	0.0953081	Upregulated
SL2688	putative bacteriophage tail protein	4.22757	0.0401941	7.01915	174.631	7.44817	2.77e-07	1.05e-05	Upregulated
SL2689	putative capsid completion protein	23.258	0.207895	38.6247	185.79	7.53753	0.0131656	0.0945149	Upregulated
SL2691	putative major capsid protein	9.52241	0.866369	15.2931	17.652	4.14176	1.68e-09	1.09e-07	Upregulated
SL2695	putative competence protein	45.1226	89.8843	15.2815	0.170013	-2.55628	0.000762466	0.0094621	Downregulated
SL2714	hypothetical protein	23.4622	56.7733	1.2548	0.022102	-5.49968	0.000980186	0.0116765	Downregulated
SL2715	hypothetical protein	94.7185	233.032	2.50961	0.0107694	-6.53692	6.85e-07	2.34e-05	Downregulated
SL2716	bacteriophage polarity suppression protein	7.74542	2.0705	11.5287	5.56807	2.47718	0.000882313	0.0106464	Upregulated
SL2718	probable bacteriophage capsid protein	20.4529	1.48853	33.0958	22.2338	4.47469	0.00832264	0.0657368	Upregulated
SL2720	predicted bacteriophage protein	7.10569	2.35338	10.2739	4.36559	2.12618	0.00961855	0.073746	Upregulated
SL2730	putative ATPase	149.725	252.608	81.137	0.321197	-1.63847	0.0051116	0.0452366	Downregulated
SL2732	putative transcriptional regulator	21.7077	46.7403	5.01921	0.107385	-3.21914	0.00638888	0.0539836	Downregulated
SL2737	putative dehydrogenase	38.9652	10.9477	57.6435	5.26537	2.39654	5.04e-14	7.67e-12	Upregulated
SL2751	conserved hypothetical protein	14.8747	6.73555	20.3007	3.01396	1.59166	0.00064464	0.00823426	Upregulated
SL2752	putative DNA/RNA helicase	107.652	187.237	54.5952	0.291584	-1.77802	0.000222321	0.0033735	Downregulated
SL2784	putative membrane protein	198.647	473.325	15.5286	0.0328074	-4.92983	1.78e-05	0.000374251	Downregulated
SL2824	putative exported protein	9.60145	2.94616	14.0383	4.76495	2.25246	0.000157897	0.00250642	Upregulated
SL2880	salmonella pathogenicity island 1 protein	80.1842	183.185	11.5171	0.0628714	-3.99145	0.000171889	0.00270089	Downregulated
SL2885	salmonella pathogenicity island 1 protein	33.3871	62.057	14.2738	0.230011	-2.12023	6.57e-05	0.00118363	Downregulated
SL2920	hypothetical protein	31.9662	5.46724	49.6321	9.07809	3.18239	0	0	Upregulated
SL2929	SL2929	18.0073	31.4895	9.01909	0.286415	-1.80382	0.00405116	0.0379705	Downregulated
SL3011	hypothetical protein (assiciated with virulence)	71.3322	117.487	40.5627	0.345254	-1.53427	0.0010424	0.0122614	Downregulated
SL3012	hypothetical protein (assiciated with virulence)	66.5556	135.585	20.5362	0.151464	-2.72295	2.19e-05	0.000444201	Downregulated
SL3014	possible lipoprotein	45.7179	86.1197	18.7833	0.218107	-2.19689	0.000691862	0.00875199	Downregulated
SL3023	conserved hypothetical protein	28.2941	52.3418	12.2622	0.234272	-2.09374	0.00182194	0.0195017	Downregulated
SL3026	conserved hypothetical protein	30.3589	66.133	6.50948	0.0984302	-3.34475	1.21e-05	0.000274081	Downregulated
SL3028	hypothetical protein	19.8166	5.19129	29.5669	5.69548	2.50982	7.12e-05	0.00127293	Upregulated
SL3036	conserved hypothetical protein	86.0314	155.352	39.8176	0.256305	-1.96406	0.00290381	0.0290825	Downregulated
SL3050	possible ABC-transport protein, ATP-binding component	11.3641	3.58842	16.5479	4.61147	2.20523	1.73e-05	0.000364937	Upregulated
SL3058	zinc binding dehydrogenase	40.7129	8.92343	61.906	6.93746	2.79441	6.4e-06	0.000157861	Upregulated
SL3060	putative GntR-family regulatory protein	52.4624	121.745	6.27401	0.0515341	-4.27833	0.00022723	0.00340715	Downregulated
SL3116	possible ABC-transport protein, periplasmic-binding component	17.271	6.70921	24.3122	3.62371	1.85747	3.29e-05	0.000637375	Upregulated
SL3150	possible exported protein	19.9984	38.7027	7.52882	0.19453	-2.36194	0.00404917	0.0379705	Downregulated
SL3156	conserved hypothetical protein	28.564	67.6455	2.50961	0.0370994	-4.75246	0.00013932	0.00225533	Downregulated
SL3169	conserved hypothetical protein	96.1448	213.322	18.0266	0.084504	-3.56484	4.15e-08	1.9e-06	Downregulated
SL3176	putative membrane protein	91.8507	185.665	29.3082	0.157856	-2.66332	1.29e-08	6.7e-07	Downregulated
SL3198	probable membrane transport protein	96.4871	164.534	51.1224	0.31071	-1.68636	0.00741519	0.0602426	Downregulated
SL3199	putative membrane protein	81.8264	169.997	23.0458	0.135566	-2.88294	6.31e-11	5.29e-09	Downregulated
SL3220	conserved hypothetical protein	47.8809	15.5501	69.4348	4.46524	2.15874	1.18e-16	2.97e-14	Upregulated
SL3249	possible monooxygenase	29.3341	13.9448	39.5937	2.83931	1.50554	1.83e-05	0.000379577	Upregulated
SL3261	conserved hypothetical protein	44.7216	83.6289	18.7833	0.224603	-2.15455	7.6e-06	0.000182008	Downregulated
SL3284	putative membrane protein	29.654	7.96282	44.1148	5.5401	2.46991	2.64e-12	3.19e-10	Upregulated
SL3293	probable sigma(54) modulation protein	37.0978	66.8136	17.2872	0.258738	-1.95043	1.43e-05	0.000313064	Downregulated
SL3319	conserved hypothetical protein	36.4167	64.0019	18.0266	0.281657	-1.82799	9.7e-07	3.25e-05	Downregulated
SL3330	possible GntR-family transcriptional regulator	21.3409	49.5879	2.50961	0.0506093	-4.30445	0.00801518	0.0638718	Downregulated
SL3333	conserved hypothetical protein	36.9909	77.0665	10.2739	0.133312	-2.90712	0.000823744	0.0100509	Downregulated
SL3339	probable LysR-family transcriptional regulator	28.1452	12.8373	38.3505	2.98743	1.5789	1.53e-06	4.84e-05	Upregulated
SL3341	possible exported protein	102.428	21.8425	156.151	7.14897	2.83773	0.00391754	0.0371854	Upregulated
SL3429	conserved hypothetical protein	108.858	194.361	51.8559	0.266802	-1.90616	3.41e-06	9.1e-05	Downregulated
SL3478	conserved hypothetical protein	122.735	261.741	30.0649	0.114865	-3.12198	1.82e-09	1.17e-07	Downregulated
SL3484	conserved hypothetical protein (homologue of DnaJ: DNA damage inducible protein)	34.9344	76.816	7.01335	0.0913007	-3.45323	0.000119194	0.00196851	Downregulated
SL3498	putative dehydratase	35.0132	10.1431	51.5933	5.08654	2.34669	1.73e-07	6.86e-06	Upregulated
SL3510	conserved hypothetical protein	15.0213	6.73167	20.5478	3.05241	1.60995	0.00231914	0.0240749	Upregulated
SL3516	puative phophotriesterase	17.6883	7.75256	24.3122	3.13602	1.64893	0.000135934	0.00221147	Upregulated
SL3518	hypothetical protein	195.371	433.593	36.557	0.0843119	-3.56812	0.000225387	0.00338858	Downregulated
SL3538	putative membrane protein	16.9547	28.858	9.01909	0.312533	-1.67792	0.00916644	0.0715376	Downregulated
SL3561	conserved hypothetical protein	41.4344	78.7642	16.5479	0.210094	-2.25089	1.65e-06	5.11e-05	Downregulated
SL3607	putative lipoprotein	49.2146	84.6861	25.567	0.301903	-1.72784	6.65e-05	0.00119533	Downregulated
SL3633	putative carboxylic acid dehydrogenase	14.6407	2.01562	23.0574	11.4394	3.51594	8.73e-10	5.89e-08	Upregulated
SL3653	hypothetical protein	69.4826	166.178	5.01921	0.0302039	-5.04912	6.76e-07	2.33e-05	Downregulated
SL3662	putative racemase	19.7759	9.20715	26.8218	2.91315	1.54258	5.76e-05	0.00105254	Upregulated
SL3732	conserved hypothetical protein	19.9809	2.96389	31.3255	10.5691	3.40177	9.97e-05	0.00169807	Upregulated
SL3736	putative PTS system protein	24.6896	3.84495	38.586	10.0355	3.32704	0.00291167	0.0291168	Upregulated
SL3743	conserved hypothetical protein	47.8284	109.042	7.01915	0.064371	-3.95745	0.00600293	0.0514537	Downregulated
SL3751	putative GntR-family transcriptional regulator	146.572	297.646	45.8561	0.154062	-2.69841	0.00169351	0.0183674	Downregulated
SL3757	hypothetical protein	45.2954	8.76806	69.647	7.94327	2.98973	8.62e-05	0.00149482	Upregulated
SL3808	conserved hypothetical protein	36.5899	70.4348	14.0267	0.199145	-2.32811	0.000392341	0.00552997	Downregulated
SL3812	hypothetical protein	261.121	614.47	25.5554	0.0415893	-4.58764	6.74e-09	3.64e-07	Downregulated
SL3826	putative shikimate 5-dehydrogenase	32.7012	2.83402	52.6127	18.5647	4.21449	0.00357328	0.0344172	Upregulated
SL3854	putative transmembrane efflux protein (pseudogene)	18.1905	4.90773	27.0457	5.51083	2.46227	0.000224619	0.00338858	Upregulated
SL3858	possible LysR-family transcriptional regulatory protein	46.9343	77.9024	26.2889	0.33746	-1.56721	0.00591189	0.0508208	Downregulated
SL3948	ATP/GTP-binding protein	33.7903	62.3005	14.7834	0.237292	-2.07526	7.76e-06	0.000185125	Downregulated
SL3958	putative coproporphyrinogen III oxidase	32.1355	14.9309	43.6052	2.92046	1.5462	4.16e-06	0.000108894	Upregulated
SL4006	hypothetical protein	14.5187	5.47501	20.5478	3.75301	1.90805	0.000515886	0.00681595	Upregulated
SL4061	PTS system, protein component IIC (phosphotransferase enzyme ii, c component)	31.0332	6.19293	47.5935	7.68512	2.94207	5.46e-11	4.7e-09	Upregulated
SL4062	PTS system protein IIB component 1 (phosphotransferase enzyme ii, b component) (ec 2.7.1.69)	13.798	4.03512	20.3065	5.03245	2.33126	1.12e-06	3.74e-05	Upregulated
SL4127	conserved hypothetical protein	70.8424	133.538	29.0456	0.217509	-2.20085	0.00935704	0.0724202	Downregulated
SL4135	predicted bacteriophage protein	67.9545	10.4613	106.283	10.1597	3.34479	0.00649454	0.0545942	Upregulated
SL4145	predicted bacteriophage protein	25.9193	3.50803	40.8601	11.6476	3.54196	1.82e-18	6.27e-16	Upregulated
SL4149	Phage tail sheath protein	33.2605	9.45896	49.1283	5.19384	2.3768	0.00988873	0.0752636	Upregulated
SL4151	hypothetical protein	19.4337	1.59594	31.3255	19.6282	4.29486	9.21e-14	1.34e-11	Upregulated
SL4153	endolysin	22.1853	1.70183	35.8409	21.0602	4.39645	2.62e-19	1.07e-16	Upregulated
SL4158	putative exported protein	7.89139	1.67093	12.0384	7.2046	2.84892	3.28e-06	8.82e-05	Upregulated
SL4186	conserved hypothetical protein	63.9091	137.96	14.5422	0.105409	-3.24593	9.98e-06	0.000230656	Downregulated
SL4205	putative sodium/hydrogen exchanger family protein	68.1416	22.2221	98.7546	4.44398	2.15185	0.00588265	0.0506884	Upregulated
SL4250	putative GerE family regulatory protein	33.2109	79.2628	2.50961	0.0316618	-4.98111	7.4e-05	0.0013152	Downregulated
SL4251	araC family regulatory protein	484.794	1175.16	24.5477	0.0208887	-5.58113	0.000227664	0.00340715	Downregulated
SL4253	conserved hypothetical protein	26.1472	46.9572	12.2738	0.261383	-1.93576	0.0064448	0.0543113	Downregulated
SL4257	conserved hypothetical protein	8.8668	2.99176	12.7835	4.2729	2.09522	0.001027	0.0121457	Upregulated
SL4371	hypothetical protein	19.3506	2.4971	30.5862	12.2487	3.61456	0.00217757	0.022896	Upregulated
SL4372	hypothetical protein	10.7589	0.957565	17.293	18.0594	4.17468	3.62e-09	2.17e-07	Upregulated
SL4376	conserved hypothetical protein	42.1359	2.30542	68.6896	29.7949	4.89699	0.0018181	0.0194924	Upregulated
SL4400	conserved hypothetical protein	90.8094	174.415	35.0726	0.201087	-2.31411	0.00568146	0.0492795	Downregulated
SL4419	putative restriction endonuclease	61.8007	103.405	34.0648	0.329432	-1.60195	9.29e-08	4e-06	Downregulated
SL4427	putative inner membrane protein	22.8061	49.4864	5.01921	0.101426	-3.3015	0.000562478	0.00734253	Downregulated
SL4429	conserved hypothetical protein	95.4777	213.872	16.5479	0.0773728	-3.69203	1.82e-07	7.11e-06	Downregulated
SL4431	hypothetical protein	44.9988	95.2039	11.5287	0.121095	-3.04579	0.00808282	0.0641525	Downregulated
SL4433	putative inner membrane protein	116.277	253.125	25.0457	0.0989463	-3.33721	9.11e-07	3.1e-05	Downregulated
SL4436	hypothetical protein	20.7024	39.345	8.27395	0.210293	-2.24953	0.00107691	0.012532	Downregulated
SL4445	putative membrane protein	39.4978	85.2157	9.01909	0.105838	-3.24007	0.00143201	0.0159818	Downregulated
SL4452	conserved hypothetical protein	19.3165	0.54718	31.8294	58.1699	5.8622	8.07e-10	5.58e-08	Upregulated
SL4468	PTS transport system, IIC component	21.9732	3.0713	34.5745	11.2573	3.49279	0.00431598	0.039644	Upregulated
SL4480	conserved hypothetical protein	40.6989	66.7585	23.3258	0.349405	-1.51703	0.0102216	0.0769263	Downregulated
SL4482	putative membrane protein	36.9242	73.8997	12.2738	0.166088	-2.58998	0.00851198	0.0670703	Downregulated
SL4526	conserved hypothetical protein	362.407	886.859	12.7719	0.0144013	-6.11766	3.52e-08	1.68e-06	Downregulated
SLP1_0047	predicted protein	20.3861	0.968374	33.3313	34.4199	5.10517	0.00392873	0.0371882	Upregulated
SLP1_0048	predicted protein	15.8299	0.459868	26.0767	56.7047	5.8254	0.00535084	0.0469722	Upregulated
SLP1_0051	predicted protein	20.4234	1.43213	33.0842	23.1015	4.52991	4.81e-19	1.75e-16	Upregulated
SLP1_0074	putative inner membrane protein	50.8499	3.82334	82.2009	21.4998	4.42625	2.43e-06	7.03e-05	Upregulated
SLP1_0091	hypothetical protein	538.008	1209.06	90.6426	0.0749697	-3.73755	1.08e-11	1.08e-09	Downregulated
SLP1_0098	Not found	4.13507	0.92666	6.27401	6.77057	2.75928	0.000180706	0.00281385	Upregulated
SLP3_0002	SLP3_0002	1133.43	2551.85	187.812	0.0735983	-3.76418	9.42e-06	0.000220518	Downregulated
slyB	outer membrane lipoprotein SlyB precursor	254.677	478.942	105.167	0.219583	-2.18716	0.00321175	0.0313505	Downregulated
slyD	FKBP-type peptidyl-prolyl cis-trans isomerase	77.8739	145.058	33.0842	0.228075	-2.13242	0.000269425	0.00393313	Downregulated
smpA	small protein A	95.087	214.425	15.5286	0.0724197	-3.78747	8.72e-13	1.16e-10	Downregulated
smpB	SsrA (tmRNA) -binding protein	128.411	288.342	21.791	0.0755735	-3.72598	3.64e-07	1.35e-05	Downregulated
sodB	superoxide dismutase	277.208	558.19	89.8858	0.161031	-2.63459	0.000182446	0.00283	Downregulated
sopE	invasion-associated secreted protein.	1528.98	3799.51	15.2931	0.00402502	-7.95679	4.05e-15	7.15e-13	Downregulated
spaT	type III secretion-associated chaperone	211.519	522.032	4.50954	0.00863844	-6.85501	7.16e-08	3.14e-06	Downregulated
speE	Spermidine synthase	44.8801	87.3784	16.5479	0.189382	-2.40063	1.06e-07	4.47e-06	Downregulated
spvD	putative transposase	686.949	1665.16	34.81	0.0209049	-5.58002	8.84e-11	7.14e-09	Downregulated
srgB	putative outer membrane protein	58.0129	7.41176	91.747	12.3786	3.62977	0.00814877	0.0645193	Upregulated
srlA	PTS system, glucitol/sorbitol-specific IIBC component	11.2046	2.83639	16.7834	5.91717	2.56491	0.000721222	0.00908823	Upregulated
stbA	plasmid stability protein	113.669	216.901	44.8484	0.206769	-2.27391	1.47e-06	4.7e-05	Downregulated
stfD	periplasmic fimbrial chaperone stfd	29.3749	1.65319	47.8561	28.9476	4.85537	3.19e-06	8.64e-05	Upregulated
stpA	tyrosine phosphatase (associated with virulence)	230.73	455.491	80.8899	0.177589	-2.49339	0.000161075	0.00255068	Downregulated
sugR	putative ATP binding protein (pseudogene)	64.4246	106.2	36.5744	0.344392	-1.53788	0.00470892	0.0424192	Downregulated
tagK	putative fructose-1-phosphate kinase	11.5661	2.21118	17.8027	8.05122	3.00921	2.92e-08	1.41e-06	Upregulated
talB	transaldolase B	191.66	323.625	103.683	0.32038	-1.64215	0.00811084	0.0642969	Downregulated
tar	methyl-accepting chemotaxis protein II	220.266	460.806	59.906	0.130003	-2.94339	9.54e-15	1.64e-12	Downregulated
tctE	putative two-component system sensor kinase	47.3944	15.1157	68.9135	4.55907	2.18874	4e-14	6.22e-12	Upregulated
tdk	Thymidine kinase	24.0848	50.4477	6.50948	0.129034	-2.95417	0.00145986	0.0162372	Downregulated
tig	trigger factor	139.975	253.76	64.1182	0.252673	-1.98466	2.39e-05	0.000479672	Downregulated
tolA	tolA protein	72.6359	23.711	105.252	4.43898	2.15023	0.00148645	0.016449	Upregulated
torD	TorD protein	24.8338	6.44102	37.0957	5.75929	2.52589	1.05e-10	8.3e-09	Upregulated
tpx	Probable thiol peroxidase	153.019	341.996	27.0341	0.0790479	-3.66113	1.66e-05	0.000354907	Downregulated
traE	SLP2_0079	23.1285	48.057	6.50948	0.135454	-2.88413	6.97e-05	0.00124897	Downregulated
traH	trah pilus assembly protein (trah)	74.1217	31.9371	102.245	3.20144	1.67872	2.51e-14	4.11e-12	Upregulated
traL	SLP2_0069	14.5788	5.99585	20.3007	3.3858	1.7595	0.000224903	0.00338858	Upregulated
traN	SLP2_0067	18.9574	5.2786	28.0766	5.31895	2.41114	0.00413631	0.0384801	Upregulated
traQ	SLP2_0064	9.80882	4.5823	13.2932	2.90098	1.53654	0.00058074	0.00750601	Upregulated
traS	conjugative transfer, surface exclusion protein	248.369	480.084	93.8915	0.195573	-2.35422	0.0112911	0.0833185	Downregulated
traT	conjugative transfer, surface exclusion protein	274.826	543.917	95.4321	0.175454	-2.51084	1.78e-14	2.98e-12	Downregulated
traT	SLP2_0061	20.3348	6.48662	29.5669	4.55813	2.18844	4.86e-06	0.000125102	Upregulated
trbC	conjugative transfer assembly protein	47.8856	2.79771	77.9442	27.86	4.80012	0.000580501	0.00750601	Upregulated
trbH	conjugative transfer protein	79.7906	150.632	32.5629	0.216176	-2.20972	0.000105236	0.00177382	Downregulated
trbI	conjugative transfer protein	21.1445	0.990836	34.5803	34.9001	5.12516	5.43e-10	3.86e-08	Upregulated
trcD	conjugal transfer protein	89.3427	189.897	22.3065	0.117466	-3.08969	0.000446386	0.00617202	Downregulated
trpB	tryptophan synthase beta chain	38.8755	11.4879	57.1338	4.97338	2.31423	5.26e-12	5.74e-10	Upregulated
trxA	thioredoxin	128.783	241.964	53.3288	0.2204	-2.18181	2.24e-10	1.7e-08	Downregulated
trxC	thioredoxin 2	69.4533	156.34	11.5287	0.073741	-3.76139	0.00806719	0.0641062	Downregulated
tsx	nucleoside-specific channel-forming protein tsx precursor	68.3113	116.69	36.059	0.309015	-1.69425	0.00576308	0.0497236	Downregulated
ttrS	putative histidine kinase, two component regulatory protein	36.8898	15.1876	51.3579	3.38156	1.75769	1.77e-06	5.47e-05	Upregulated
ubiC	chorismate lyase	127.787	290.882	19.0575	0.0655162	-3.932	0.00476722	0.0428264	Downregulated
ubiG	3-demethylubiquinone-9 3-methyltransferase	114.866	263.108	16.0382	0.0609568	-4.03607	6.57e-09	3.58e-07	Downregulated
ucpA	putative oxidoreductase	115.282	219.421	45.8561	0.208987	-2.25852	0.000151563	0.00244143	Downregulated
udhA	possible pyridine nucleotide-disulphide oxidoreductase	287.177	652.906	43.3581	0.0664079	-3.9125	1.7e-07	6.8e-06	Downregulated
udk	Uridine kinase	38.1785	84.1529	7.52882	0.0894659	-3.48252	0.00989705	0.0752636	Downregulated
ugpE	sn-Glycerol-3-phosphate transport system permease protein	19.7836	5.10871	29.5669	5.78755	2.53295	0.0130415	0.0938301	Upregulated
uspA	universal stress protein A	1659.75	3972.15	118.148	0.029744	-5.07126	0.000245677	0.00361876	Downregulated
uspB	universal stress protein B	47.8093	102.23	11.5287	0.112772	-3.14852	0.00700141	0.0575965	Downregulated
uxaC	Uronate isomerase	50.1652	19.4222	70.6606	3.63813	1.8632	6.45e-06	0.0001585	Upregulated
yacA	conserved hypothetical protein	52.2614	92.3203	25.5554	0.276812	-1.85302	2.6e-07	9.89e-06	Downregulated
yadF	carbonic anhydrase	92.559	208.122	15.517	0.0745571	-3.74551	0.0104766	0.0784843	Downregulated
yaeB	SLP2_0008	48.9728	104.021	12.2738	0.117994	-3.08322	0.000361188	0.0051802	Downregulated
yafA	putative membrane protein	67.5431	145.565	15.5286	0.106678	-3.22866	3.45e-05	0.000666507	Downregulated
yafB	SLP2_0010	292.917	565.113	111.453	0.197222	-2.34211	9.3e-05	0.00160975	Downregulated
yafD	hypothetical protein	54.217	108.856	17.7911	0.163437	-2.61319	0.00499682	0.0445828	Downregulated
yafK	putative exported protein	106.229	256.162	6.27401	0.0244924	-5.35152	1.29e-07	5.25e-06	Downregulated
yaiA	conserved hypothetical protein	24.6465	55.9696	3.76441	0.0672581	-3.89415	0.000522773	0.00689301	Downregulated
yajD	conserved hypothetical protein	60.6729	147.918	2.50961	0.0169662	-5.88119	0.00078932	0.00972157	Downregulated
yajG	putative lipoprotein	64.3582	139.838	14.0383	0.10039	-3.31632	5.41e-05	0.000999143	Downregulated
ybaJ	conserved hypothetical protein	173.877	404.644	20.0323	0.049506	-4.33625	0.000117358	0.00195298	Downregulated
ybdB	conserved hypothetical protein	7.99408	0.809962	12.7835	15.7828	3.98028	4.22e-07	1.54e-05	Upregulated
ybdO	putative lysR-family transcriptional regulator	146.278	344.639	14.0383	0.0407334	-4.61764	4.91e-06	0.000125883	Downregulated
ybdR	hypothetical zinc-dependant alcohol dehydrogenase	45.5294	13.0999	67.149	5.12592	2.35781	0.0025843	0.0265327	Upregulated
ybeD	conserved hypothetical protein	56.2037	113.452	18.0382	0.158994	-2.65296	0.000408399	0.0057316	Downregulated
ybeJ	ABC transporter periplasmic binding protein (glutamate/aspartate?)	121.914	219.489	56.8635	0.259072	-1.94857	0.00146753	0.0162948	Downregulated
ybeL	conserved hypothetical protein	24.6072	55.8715	3.76441	0.0673762	-3.89162	0.00103294	0.0121719	Downregulated
ybfA	putative exported protein	89.5752	191.269	21.7794	0.113868	-3.13457	0.0103111	0.0774219	Downregulated
ybiS	putative exported protein	51.1584	93.3273	23.0458	0.246935	-2.0178	0.00333871	0.0324928	Downregulated
ybjX	putative virK protein	236.165	410.453	119.974	0.292297	-1.77449	0.000172213	0.00270089	Downregulated
yceA	SLP2_0028	15.403	0.156892	25.567	162.959	7.34837	1.13e-07	4.69e-06	Upregulated
yceB	conserved hypothetical protein	95.2403	211.414	17.7911	0.0841529	-3.57084	0.00267063	0.0272905	Downregulated
ychA	SLP2_0034	24.9039	0.222588	41.3582	185.806	7.53766	3.12e-07	1.17e-05	Upregulated
yebG	conserved hypothetical protein	61.0604	115.1	25.0341	0.2175	-2.20092	0.00697878	0.0574826	Downregulated
yecF	conserved hypothetical protein	25.0087	52.7575	6.50948	0.123385	-3.01876	0.0138802	0.0981368	Downregulated
yecH	conserved hypothetical protein	24.9067	58.5023	2.50961	0.0428975	-4.54296	0.000724544	0.00911209	Downregulated
yecI	ferritin-like protein	61.7882	141.295	8.78362	0.0621651	-4.00775	2.28e-06	6.73e-05	Downregulated
yegB	putative transporter protein	30.9405	14.1789	42.1149	2.97025	1.57059	0.000443451	0.00614443	Upregulated
yehE	conserved hypothetical protein	290.654	695.075	21.0401	0.0302702	-5.04596	0.00426633	0.0393537	Downregulated
yehS	conserved hypothetical protein	21.0009	48.7379	2.50961	0.0514919	-4.27951	0.00633897	0.0537006	Downregulated
yeiP	elongation factor p-like protein	27.6403	61.572	5.01921	0.0815178	-3.61674	0.00951485	0.0734705	Downregulated
yejD	ribosomal small subunit pseudouridine synthase	40.0662	94.5188	3.76441	0.0398271	-4.65011	0.00104976	0.0123257	Downregulated
yejE	putative binding-protein-dependent transporter	22.9804	9.33618	32.0765	3.43572	1.78061	1.66e-05	0.000354907	Upregulated
yejG	conserved hypothetical protein	34.1403	77.8219	5.01921	0.0644962	-3.95464	0.00770865	0.0620497	Downregulated
yejK	nucleoid-asociated protein	76.8481	153.804	25.5438	0.16608	-2.59005	2.6e-06	7.34e-05	Downregulated
yejL	conserved hypothetical protein	28.0967	65.3596	3.25474	0.0497974	-4.32779	0.00214447	0.0226207	Downregulated
yffB	conserved hypothetical protein	43.9261	84.6402	16.7834	0.198291	-2.33431	0.0011106	0.0128327	Downregulated
yfiA	putative sigma(54) modulation protein	2030.54	4832.71	162.428	0.0336102	-4.89496	0.00361114	0.0345276	Downregulated
yfiD	conserved hypothetical protein	231.848	558.58	14.0267	0.0251114	-5.31552	1.77e-20	8.9e-18	Downregulated
ygbK	conserved hypothetical protein	57.3749	7.71642	90.4806	11.7257	3.5516	0.00161496	0.0176619	Upregulated
yghB	DedA-family integral membrane protein	78.4302	179.909	10.7778	0.0599068	-4.06114	0.0036024	0.0344944	Downregulated
ygjM	conserved hypothetical protein	179.16	380.663	44.8252	0.117756	-3.08613	9.43e-14	1.34e-11	Downregulated
ygjN	conserved hypothetical protein	211.402	459.368	46.0916	0.100337	-3.31707	1.31e-12	1.68e-10	Downregulated
yhdN	conserved hypothetical protein	16.5689	32.0112	6.27401	0.195994	-2.35112	0.0105121	0.0784995	Downregulated
yhdV	possible lipoprotein	13.326	23.5507	6.50948	0.276403	-1.85516	0.00414314	0.0384888	Downregulated
yheA	bacterioferritin-associated ferredoxin	47.6483	96.9544	14.7776	0.152418	-2.71389	0.00059096	0.00759309	Downregulated
yheL	conserved hypothetical protein	31.6669	73.5208	3.76441	0.051202	-4.28766	0.00144169	0.0160624	Downregulated
yheO	conserved hypothetical protein	37.5158	64.0942	19.7968	0.308871	-1.69492	0.0128942	0.092975	Downregulated
yhfA	conserved hypothetical protein	68.273	126.367	29.5437	0.233793	-2.0967	2.31e-06	6.73e-05	Downregulated
yhgG	conserved hypothetical protein	6.71462	1.37572	10.2739	7.46801	2.90072	0.00107335	0.0125129	Upregulated
yhjH	conserved hypothetical protein	205.31	453.868	39.6053	0.0872617	-3.51851	4.67e-16	9.55e-14	Downregulated
yifE	conserved hypothetical protein	60.7876	122.282	19.791	0.161847	-2.6273	0.00123713	0.0140223	Downregulated
yihD	conserved hypothetical protein	74.8124	171.629	10.2681	0.0598273	-4.06305	3.68e-08	1.75e-06	Downregulated
yjeI	putative membrane protein	41.3586	93.9855	6.27401	0.0667552	-3.90498	2.85e-06	7.92e-05	Downregulated
yjeS	putative 4Fe-4S binding protein	50.4819	98.383	18.5478	0.188527	-2.40716	0.000364965	0.00519188	Downregulated
yjga	conserved hypothetical protein	62.6872	135.661	14.0383	0.103481	-3.27256	0.00303206	0.030045	Downregulated
yjgF	conserved hypothetical protein	92.8375	197.543	23.0342	0.116604	-3.10031	0.00284048	0.0287121	Downregulated
yliC	hypothetical ABC transporter permease protein	36.6503	5.53125	57.3964	10.3768	3.37528	0.00686019	0.0567202	Upregulated
yliG	conserved hypothetical protein	68.0513	120.149	33.3197	0.277321	-1.85037	0.000673775	0.00855628	Downregulated
yohN	conserved hypothetical protein	45.5021	106.991	4.50954	0.0421488	-4.56836	8.8e-08	3.84e-06	Downregulated
yrdC	conserved hypothetical protein	75.3175	147.725	27.0457	0.183081	-2.44945	1.64e-06	5.11e-05	Downregulated
yrfG	putative hydrolase	54.8455	99.5539	25.0399	0.251521	-1.99125	0.00125791	0.014184	Downregulated
ytfB	conserved hypothetical protein	45.794	95.3097	12.7835	0.134126	-2.89834	0.00316859	0.031115	Downregulated
ytfP	conserved hypothetical protein	18.6647	42.8974	2.50961	0.0585025	-4.09536	0.0139366	0.098323	Downregulated
