# Supplementary material for: Transcriptome and proteome analysis of Salmonella enterica serovar Typhimurium systemic infection of wild type and immune-deficient mice
Source: PLoS One. 2017 Aug 10;12(8):e0181365. doi: 10.1371/journal.pone.0181365 (PMC5552096; doi:10.1371/journal.pone.0181365)
Supplement: S4 Table — Table showing the DE genes from the Group 2 S. Typhimurium vs in vitro Input comparison. (XLS) [file pone.0181365.s004.xls]

## Sheet: Group 2 vs Input
Gene Name	Product Annotation	BaseMean	BaseMeanA	BaseMeanB	Fold Change	log2 Fold-Change	P-value	False Discovery Rate (FDR)	Effect
aceF	dihydrolipoamide acetyltransferase component (E2) of pyruvate dehydrogenase	256.485	44.0962	398.077	9.02747	3.17432	7.00803e-15	1.52471e-12	Upregulated
acrD	putative efflux pump	42.286	86.2823	12.9552	0.150149	-2.73553	0.000920341	0.0115521	Downregulated
acrR	potential acrAB operon repressor	135.276	284.498	35.7939	0.125814	-2.99064	0.000313396	0.00481303	Downregulated
acs	acetyl-coenzyme A synthetase	196.584	80.3188	274.094	3.41258	1.77086	0.00847542	0.0686341	Upregulated
aldB	aldehyde dehydrogenase B	211.633	92.5572	291.017	3.14419	1.65269	0.0120414	0.0889078	Upregulated
amiA	probable N-acetylmuramoyl-L-alanine amidase	37.7873	72.7674	14.4671	0.198813	-2.33052	0.0139185	0.0982117	Downregulated
ampH	penicillin-binding protein AmpH	35.4596	82.3704	4.18577	0.0508165	-4.29856	9.34869e-05	0.00170444	Downregulated
ansB	L-asparaginase	52.0432	104.597	17.0073	0.162598	-2.62062	0.0108931	0.0823545	Downregulated
arcA	global response regulator	496.478	942.817	198.918	0.210982	-2.24481	0.000160377	0.00270485	Downregulated
argC	N-acetyl-gamma-glutamyl-phosphate reductase	35.3213	75.5478	8.50365	0.11256	-3.15124	0.00179828	0.0196095	Downregulated
artJ	arginine-binding periplasmic protein 2 precursor	124.865	288.592	15.7133	0.0544481	-4.19898	1.28426e-14	2.6195e-12	Downregulated
artM	arginine transport system permease protein ArtM	10.8979	24.1055	2.09289	0.0868219	-3.5258	0.00211785	0.0224768	Downregulated
artP	arginine transport ATP-binding protein ArtP	122.91	291.179	10.7302	0.0368509	-4.76215	2.28877e-06	7.62182e-05	Downregulated
asd	aspartate-semialdehyde dehydrogenase	90.1584	152.545	48.5675	0.318383	-1.65117	0.00259371	0.0264105	Downregulated
aspA	aspartate ammonia-lyase	878.152	1710.86	323.012	0.188801	-2.40507	7.28899e-07	2.88335e-05	Downregulated
asr	putative secreted stress response protein	667.853	16.236	1102.26	67.8902	6.08513	6.26323e-10	5.84001e-08	Upregulated
asrA	anaerobic sulfite reductase subunit A	29.3888	63.8559	6.41076	0.100394	-3.31625	0.00277337	0.0275521	Downregulated
astB	succinylarginine dihydrolase	15.2018	3.42201	23.055	6.73728	2.75217	5.55245e-06	0.000167008	Upregulated
astE	Succinylglutamate desuccinylase	11.8819	4.39205	16.8752	3.84222	1.94194	0.00511997	0.0457155	Upregulated
atpA	ATP synthase alpha subunit	364.1	109.375	533.917	4.88153	2.28733	0.000245443	0.00384174	Upregulated
atpD	ATP synthase beta subunit	319.786	75.2424	482.815	6.4168	2.68185	0.00913552	0.0721011	Upregulated
atpF	ATP synthase subunit B	209.156	71.2886	301.068	4.22322	2.07834	3.2762e-05	0.000710821	Upregulated
atpH	ATP synthase delta subunit	120.526	54.7133	164.402	3.00479	1.58726	0.00158673	0.0177685	Upregulated
atpI	ATP synthase protein I.	113.809	204.522	53.3343	0.260776	-1.93912	0.00187418	0.020253	Downregulated
barA	sensor protein	35.6541	79.5192	6.41076	0.080619	-3.63274	3.96277e-05	0.000831672	Downregulated
bax	putative exported amidase	122.951	235.923	47.6366	0.201916	-2.30817	0.00763127	0.0639401	Downregulated
bioD	dethiobiotin synthetase	8.34354	1.22555	13.0889	10.68	3.41683	3.56076e-05	0.00076451	Upregulated
btuB	vitamin B12 receptor protein	31.1806	55.7779	14.7823	0.265021	-1.91582	0.0123148	0.0904151	Downregulated
caiF	transcriptional activator CaiF	75.1931	178.565	6.27866	0.0351618	-4.82985	0.001105	0.0132824	Downregulated
cap	cyclic AMP receptor protein,catabolite gene activator	151.064	261.261	77.599	0.297018	-1.75138	0.00167329	0.0184486	Downregulated
carA	carbamoyl-phosphate synthase small chain	91.1087	191.446	24.2169	0.126495	-2.98285	0.000221752	0.00352182	Downregulated
cbiE	precorrin-6Y C5,15-methyltransferase [decarboxylating]	6.79315	1.08808	10.5965	9.73873	3.28373	0.00270947	0.0271157	Upregulated
cbiH	precorrin-3 C17-methyltransferase	8.97747	2.81038	13.0889	4.65733	2.2195	0.00271281	0.0271157	Upregulated
cbpA	curved DNA-binding protein	133.996	260.744	49.4969	0.18983	-2.39722	8.58755e-08	4.31161e-06	Downregulated
ccmE1	protoheme transport protein E1	8.84923	1.42019	13.8019	9.71835	3.28071	0.000785882	0.0102384	Upregulated
cib	colicin Ib protein	249.326	82.6264	360.46	4.36252	2.12516	0.00289011	0.0284521	Upregulated
cigR	putative inner membrane protein	19.8377	43.3157	4.18577	0.0966341	-3.37132	9.28182e-06	0.000254548	Downregulated
citE	citrate lyase beta chain	15.4467	2.69233	23.9496	8.89548	3.15307	4.58613e-05	0.000932513	Upregulated
clcB	Voltage-gated ClC-type chloride channel clcB. Putative chloride channel protein clcB-like.	31.0067	63.3649	9.43463	0.148894	-2.74765	0.0083287	0.0677823	Downregulated
clpP	ATP-dependent clp protease proteolytic subunit	155.928	269.43	80.2599	0.297888	-1.74716	2.92257e-07	1.28889e-05	Downregulated
coaE	Dephospho-CoA kinase	29.7981	67.4193	4.71731	0.0699697	-3.83713	0.00100629	0.0123228	Downregulated
crl	curlin genes transcriptional activator	50.2102	99.814	17.141	0.171729	-2.54179	0.000758408	0.0099201	Downregulated
csiD	Protein csiD.	39.8401	12.5253	58.05	4.6346	2.21245	0.000109229	0.00195326	Upregulated
csiE	stationary phase inducible protein CsiE	62.6153	110.597	30.6277	0.276931	-1.8524	0.00389704	0.0361306	Downregulated
cspD	cold shock-like protein CspD	527.651	1131.57	125.038	0.110499	-3.17789	2.4023e-12	3.64647e-10	Downregulated
cybC	soluble cytochrome b562	31.5472	69.0514	6.54443	0.0947762	-3.39933	0.00226708	0.0237884	Downregulated
cydD	transport ATP-binding protein CydD	47.3131	91.5736	17.8062	0.194447	-2.36255	0.0129079	0.0932997	Downregulated
cyoA	cytochrome o ubiquinol oxidase subunit II	297.851	499.02	163.738	0.328119	-1.60771	0.00260573	0.0264915	Downregulated
cysB	cys regulon transcriptional activator	70.3534	149.174	17.8062	0.119365	-3.06655	5.61381e-05	0.00110365	Downregulated
cysJ	sulfite reductase (NADPH) flavoprotein beta subunit	12.8179	5.13744	17.9383	3.49168	1.80392	0.0115503	0.0860602	Upregulated
cysQ	cysQ protein	59.1152	109.195	25.7289	0.235624	-2.08544	0	0	Downregulated
dapF	diaminopimelate epimerase	37.7796	64.999	19.6333	0.302055	-1.72712	0.000194884	0.00318799	Downregulated
dctA	C4-dicarboxylate transport protein	84.8051	168.411	29.0679	0.172601	-2.53449	0.00034411	0.00521115	Downregulated
dcuA	anaerobic C4-dicarboxylate transporter	140.06	324.239	17.2746	0.0532774	-4.23033	7.0418e-12	9.57538e-10	Downregulated
ddl	D-alanine--D-alanine ligase	53.6252	20.0041	76.0393	3.80118	1.92645	0.00485481	0.0436465	Upregulated
degQ	serine protease	66.356	111.13	36.5069	0.328508	-1.606	0.0124377	0.0907418	Downregulated
deoA	thymidine phosphorylase	65.4547	25.4111	92.1504	3.62638	1.85853	1.49891e-05	0.000378356	Upregulated
deoC	deoxyribose-phosphate aldolase	83.8966	17.627	128.076	7.26591	2.86114	0.00407542	0.0376241	Upregulated
dgoA	2-dehydro-3-deoxy-6-phosphogalactonate aldolase (ec 4.1.2.21) (6- phospho-2-dehydro-3-deoxygalactonate aldolase) (2-oxo-3- deoxygalactonate 6-phosphate aldolase)	7.16466	1.21955	11.1281	9.12472	3.18978	0.0038125	0.0354476	Upregulated
dmsA	anaerobic dimethyl sulfoxide reductase chain A precursor	238.882	559.014	25.4615	0.0455472	-4.45649	0.000756197	0.00991104	Downregulated
dmsB	anaerobic dimethyl sulfoxide reductase chain B	27.73	64.5169	3.20538	0.0496828	-4.33111	4.64506e-08	2.52058e-06	Downregulated
dmsC	anaerobic dimethyl sulfoxide reductase chain C	24.576	42.604	12.5573	0.294745	-1.76246	0.00765425	0.0640504	Downregulated
dppA	periplasmic dipeptide transport protein precursor	174.607	366.406	46.7404	0.127565	-2.9707	1.53936e-08	1.01489e-06	Downregulated
dppD	dipeptide transport ATP-binding protein DppD	18.0316	6.68625	25.5952	3.82803	1.9366	0.00119352	0.0140539	Upregulated
dps	DNA protection during starvation protein	1698.52	2905.31	893.998	0.307711	-1.70035	2.34998e-09	1.91729e-07	Downregulated
dsbG	thiol:disulfide interchange protein DsbG precursor	24.7057	45.8694	10.5965	0.231015	-2.11394	0.000559048	0.0078135	Downregulated
dut	deoxyuridine 5'-triphosphate nucleotidohydrolase	40.0929	71.6561	19.0508	0.265864	-1.91124	1.33808e-05	0.000345203	Downregulated
eco	Ecotin precursor.	74.1733	165.003	13.6204	0.0825466	-3.59865	1.74541e-06	6.15203e-05	Downregulated
efp	elongation factor P	87.2769	166.368	34.5493	0.207667	-2.26765	3.91543e-08	2.2031e-06	Downregulated
emrD	multidrug resistance protein D	48.4892	108.069	8.76942	0.0811465	-3.62333	7.05846e-05	0.00135901	Downregulated
emrR	putative transcriptional regulator	82.0112	191.673	8.90309	0.0464492	-4.4282	3.75134e-08	2.16681e-06	Downregulated
eno	Enolase	232.201	94.245	324.172	3.43967	1.78227	0.0053014	0.0469501	Upregulated
erfK	putative exported protein	117.014	256.21	24.2169	0.0945199	-3.40324	2.6515e-11	3.3934e-09	Downregulated
eutA	putative ethanolamine utilization protein EutA	12.0202	3.94047	17.4067	4.41743	2.14321	0.00289987	0.0285052	Upregulated
eutC	Ethanolamine ammonia-lyase light chain	19.2623	1.81547	30.8935	17.0168	4.08889	1.32208e-10	1.46257e-08	Upregulated
eutE	putative aldehyde dehydrogenase	22.8754	2.02953	36.7727	18.1188	4.17941	0.000834834	0.0107475	Upregulated
eutJ	putative ethanolamine utilization protein EutJ	14.0922	1.17297	22.705	19.3569	4.27478	8.99765e-09	6.38344e-07	Upregulated
eutL	ethanolamine utilization protein EutL	37.5878	4.82475	59.4298	12.3177	3.62266	0.000583886	0.00809135	Upregulated
eutM	ethanolamine utilization protein	33.981	1.33902	55.7423	41.6292	5.37952	0.00728148	0.0616423	Upregulated
exc	surface exclusion protein	264.494	556.943	69.5281	0.124839	-3.00186	1.78703e-07	8.51384e-06	Downregulated
fbp	fructose-1,6-bisphosphatase	206.961	412.165	70.1585	0.170219	-2.55453	1.07309e-05	0.000283566	Downregulated
fes	enterochelin esterase	19.299	3.10332	30.0962	9.69804	3.27769	5.75737e-08	3.00627e-06	Upregulated
fhlA	transcriptional activator of the formate hydrogenlyase system	37.5539	84.2685	6.41076	0.0760754	-3.71643	4.82694e-05	0.000975401	Downregulated
flaG	flagellin	280.279	661.832	25.9104	0.0391495	-4.67486	8.49699e-17	2.5209e-14	Downregulated
fldA	flavodoxin 1	100.783	196.999	36.639	0.185986	-2.42674	0.00827314	0.0675829	Downregulated
fldB	flavodoxin II	40.0797	81.2394	12.64	0.15559	-2.68418	0.000183765	0.00303653	Downregulated
flgK	flagellar hook-associated protein 1	122.28	252.41	35.5265	0.140749	-2.8288	3.89632e-09	2.99191e-07	Downregulated
flgM	negative regulator of flagellin synthesis (anti-sigma factor)	150.634	366.97	6.41076	0.0174694	-5.83902	5.38234e-20	2.70235e-17	Downregulated
flgN	flagella synthesis protein FlgN	112.832	250.29	21.1931	0.0846741	-3.56194	8.8159e-13	1.40345e-10	Downregulated
flhD	Transcriptional activator flhD.	56.4871	100.557	27.1071	0.269569	-1.89127	0.00756849	0.0636592	Downregulated
fliA	RNA polymerase sigma transcription factor for flagellar operon	37.5935	86.9079	4.71731	0.0542795	-4.20345	0.000144401	0.00247281	Downregulated
fliB	lysine-N-methylase (ec 2.1.1.-) (lysine N-methyltransferase)	33.5155	76.7128	4.71731	0.0614932	-4.02343	0.000250055	0.00389525	Downregulated
fliC	flagellin	608.595	1408.9	75.0573	0.0532736	-4.23044	2.48356e-23	1.80113e-20	Downregulated
fmt	methionyl-tRNA formyltransferase	51.3406	83.8805	29.6473	0.353447	-1.50044	0.00346978	0.0329175	Downregulated
fnr	fumarate and nitrate reduction regulatory protein	385.866	810.345	102.881	0.126959	-2.97757	8.04313e-10	7.29132e-08	Downregulated
focA	probable formate transporter (formate channel)	268.451	508.733	108.263	0.212809	-2.23237	4.52809e-05	0.000929397	Downregulated
FQ312003.1526	FQ312003.1526	15.2912	31.9493	4.18577	0.131013	-2.93222	0.0113017	0.0846915	Downregulated
FQ312003.3325	FQ312003.3325	98.7148	207.124	26.4419	0.127662	-2.9696	6.53204e-07	2.61562e-05	Downregulated
FQ312003.4499	FQ312003.4499	21.1844	2.68404	33.5179	12.4878	3.64245	5.77133e-10	5.45934e-08	Upregulated
FQ312003_intergenic_1000151_1000308	FQ312003_intergenic_1000151_1000308	48.0729	89.2642	20.6121	0.230911	-2.11459	0.00354039	0.033297	Downregulated
FQ312003_intergenic_1047490_1047995	FQ312003_intergenic_1047490_1047995	110.95	265.491	7.92269	0.0298416	-5.06653	4.48259e-05	0.000925881	Downregulated
FQ312003_intergenic_1254940_1254986	FQ312003_intergenic_1254940_1254986	3.40484	0.166055	5.56404	33.5072	5.0664	0.00581634	0.0508891	Upregulated
FQ312003_intergenic_1295345_1295925	FQ312003_intergenic_1295345_1295925	46.9032	105.374	7.92269	0.0751864	-3.73338	0.000141908	0.00244389	Downregulated
FQ312003_intergenic_1316682_1317221	FQ312003_intergenic_1316682_1317221	1157.84	188.269	1804.22	9.58319	3.26051	0.000565785	0.00789076	Upregulated
FQ312003_intergenic_1366289_1366360	FQ312003_intergenic_1366289_1366360	10.2384	2.22646	15.5796	6.99748	2.80683	0.000801749	0.0104036	Upregulated
FQ312003_intergenic_1440240_1440459	FQ312003_intergenic_1440240_1440459	176.191	7.96836	288.339	36.1855	5.17734	0.000556534	0.00779506	Upregulated
FQ312003_intergenic_1462286_1462474	FQ312003_intergenic_1462286_1462474	21.8774	48.4148	4.18577	0.0864566	-3.53188	0.0102483	0.0785102	Downregulated
FQ312003_intergenic_1492668_1493182	FQ312003_intergenic_1492668_1493182	41.9371	98.564	4.18577	0.0424676	-4.55749	0.00176118	0.0192549	Downregulated
FQ312003_intergenic_1516737_1517053	FQ312003_intergenic_1516737_1517053	78.4435	166.859	19.4996	0.116863	-3.09711	0.000111616	0.00198506	Downregulated
FQ312003_intergenic_1611552_1611936	FQ312003_intergenic_1611552_1611936	83.2437	188.476	13.0889	0.0694458	-3.84797	0.00729338	0.0616631	Downregulated
FQ312003_intergenic_1650035_1650207	FQ312003_intergenic_1650035_1650207	12.7762	4.56039	18.2535	4.00261	2.00094	0.00637219	0.0548698	Upregulated
FQ312003_intergenic_1677771_1678095	FQ312003_intergenic_1677771_1678095	20.2552	0.958034	33.12	34.5708	5.11148	1.85499e-16	5.26414e-14	Upregulated
FQ312003_intergenic_1679888_1680693	FQ312003_intergenic_1679888_1680693	44.6982	6.50789	70.1585	10.7805	3.43036	0.00219281	0.0231594	Upregulated
FQ312003_intergenic_1706565_1706950	FQ312003_intergenic_1706565_1706950	103.203	207.057	33.9667	0.164046	-2.60783	0.000500061	0.0071734	Downregulated
FQ312003_intergenic_1834399_1834563	FQ312003_intergenic_1834399_1834563	113.766	238.946	30.3125	0.126859	-2.9787	0.000115252	0.00203862	Downregulated
FQ312003_intergenic_1839813_1839870	FQ312003_intergenic_1839813_1839870	4.94088	0.468159	7.92269	16.9231	4.08092	0.00271282	0.0271157	Upregulated
FQ312003_intergenic_1922869_1923024	FQ312003_intergenic_1922869_1923024	15.4253	5.37724	22.124	4.11439	2.04068	0.00101088	0.0123558	Upregulated
FQ312003_intergenic_1978572_1978652	FQ312003_intergenic_1978572_1978652	25.0672	59.13	2.35866	0.0398894	-4.64785	0.00207417	0.022085	Downregulated
FQ312003_intergenic_1979685_1980370	FQ312003_intergenic_1979685_1980370	132.406	302.563	18.9681	0.0626914	-3.99559	0.00033208	0.00506422	Downregulated
FQ312003_intergenic_2039709_2040021	FQ312003_intergenic_2039709_2040021	92.7453	155.003	51.2398	0.330572	-1.59696	0.00904054	0.071673	Downregulated
FQ312003_intergenic_2041561_2041744	FQ312003_intergenic_2041561_2041744	11.3241	2.20017	17.4067	7.91155	2.98396	0.000101065	0.00181722	Upregulated
FQ312003_intergenic_2079825_2080015	FQ312003_intergenic_2079825_2080015	71.7422	161.193	12.1085	0.0751179	-3.7347	2.82667e-05	0.000632294	Downregulated
FQ312003_intergenic_2088168_2088600	FQ312003_intergenic_2088168_2088600	42.5406	87.3915	12.64	0.144637	-2.7895	0.00179962	0.0196095	Downregulated
FQ312003_intergenic_2093600_2093960	FQ312003_intergenic_2093600_2093960	202.826	456.587	33.6516	0.0737024	-3.76215	4.03941e-08	2.23787e-06	Downregulated
FQ312003_intergenic_2277817_2277892	FQ312003_intergenic_2277817_2277892	5.05029	0.74168	7.92269	10.6821	3.41712	0.00881746	0.0701848	Upregulated
FQ312003_intergenic_2319859_2320148	FQ312003_intergenic_2319859_2320148	84.7808	169.348	28.4027	0.167718	-2.57589	0.00953695	0.07437	Downregulated
FQ312003_intergenic_2338323_2338550	FQ312003_intergenic_2338323_2338550	16.9946	0.954322	27.6881	29.0134	4.85865	4.18617e-12	6.2098e-10	Upregulated
FQ312003_intergenic_2425114_2425326	FQ312003_intergenic_2425114_2425326	19.7751	3.49631	30.6277	8.76	3.13093	2.40296e-07	1.08918e-05	Upregulated
FQ312003_intergenic_2437265_2437558	FQ312003_intergenic_2437265_2437558	42.4532	99.8542	4.18577	0.0419189	-4.57626	2.15631e-05	0.000508094	Downregulated
FQ312003_intergenic_2438830_2439660	FQ312003_intergenic_2438830_2439660	119.807	215.981	55.6914	0.257854	-1.95538	0.0135022	0.0960009	Downregulated
FQ312003_intergenic_2445366_2445604	FQ312003_intergenic_2445366_2445604	26.5143	61.4777	3.20538	0.0521389	-4.2615	0.0103245	0.0788165	Downregulated
FQ312003_intergenic_2541969_2542251	FQ312003_intergenic_2541969_2542251	68.4354	156.065	10.0156	0.0641756	-3.96183	2.16946e-08	1.38824e-06	Downregulated
FQ312003_intergenic_2681193_2681251	FQ312003_intergenic_2681193_2681251	73.3423	176.28	4.71731	0.0267604	-5.22376	1.4884e-09	1.27826e-07	Downregulated
FQ312003_intergenic_2768884_2768934	FQ312003_intergenic_2768884_2768934	75.9852	172.672	11.5275	0.0667597	-3.90488	0.00154087	0.0174303	Downregulated
FQ312003_intergenic_2786753_2786970	FQ312003_intergenic_2786753_2786970	109.044	246.699	17.2746	0.0700231	-3.83602	0.000681128	0.00913881	Downregulated
FQ312003_intergenic_2796699_2802478	FQ312003_intergenic_2796699_2802478	821450	94479.5	1.3061e+06	13.8241	3.78912	7.08193e-05	0.00135952	Upregulated
FQ312003_intergenic_2833416_2833437	FQ312003_intergenic_2833416_2833437	9.15972	18.0912	3.20538	0.177179	-2.49672	0.0114734	0.0857808	Downregulated
FQ312003_intergenic_2855115_2855565	FQ312003_intergenic_2855115_2855565	10847.3	2844.08	16182.9	5.69002	2.50843	0.00260997	0.0264934	Upregulated
FQ312003_intergenic_2863777_2863872	FQ312003_intergenic_2863777_2863872	52.782	128.417	2.35866	0.0183672	-5.76673	3.2769e-05	0.000710821	Downregulated
FQ312003_intergenic_288852_295009	FQ312003_intergenic_288852_295009	880751	89484.9	1.40826e+06	15.7374	3.97613	4.72805e-06	0.000146025	Upregulated
FQ312003_intergenic_2893776_2894391	FQ312003_intergenic_2893776_2894391	262.802	645.917	7.39115	0.0114429	-6.44941	2.78353e-05	0.000626485	Downregulated
FQ312003_intergenic_2920037_2920158	FQ312003_intergenic_2920037_2920158	2.61036	0.247227	4.18577	16.9309	4.08159	0.0122983	0.0903952	Upregulated
FQ312003_intergenic_2948396_2949327	FQ312003_intergenic_2948396_2949327	376.572	25.0486	610.921	24.3894	4.60818	2.0011e-07	9.32943e-06	Upregulated
FQ312003_intergenic_2969504_2969750	FQ312003_intergenic_2969504_2969750	48.5643	96.7713	16.4263	0.169744	-2.55857	0.000847954	0.0108116	Downregulated
FQ312003_intergenic_3022215_3022323	FQ312003_intergenic_3022215_3022323	3.95826	0.279522	6.41076	22.9347	4.51946	0.0142609	0.0998724	Upregulated
FQ312003_intergenic_3138169_3138679	FQ312003_intergenic_3138169_3138679	1407.75	2393.3	750.714	0.313673	-1.67266	0.00930527	0.0729994	Downregulated
FQ312003_intergenic_3141720_3142183	FQ312003_intergenic_3141720_3142183	58.8682	137.752	6.27866	0.0455793	-4.45548	0.00435102	0.0397747	Downregulated
FQ312003_intergenic_3156702_3156947	FQ312003_intergenic_3156702_3156947	94.4935	165.054	47.4535	0.287503	-1.79835	0.00060859	0.00831018	Downregulated
FQ312003_intergenic_3157276_3157367	FQ312003_intergenic_3157276_3157367	29.2471	69.5797	2.35866	0.0338986	-4.88263	0.0133617	0.0955482	Downregulated
FQ312003_intergenic_3197202_3197213	FQ312003_intergenic_3197202_3197213	4.61052	0.439576	7.39115	16.8143	4.07162	0.00209256	0.0222445	Upregulated
FQ312003_intergenic_3237453_3237806	FQ312003_intergenic_3237453_3237806	29.932	63.7432	7.39115	0.115952	-3.1084	0.0118218	0.0877278	Downregulated
FQ312003_intergenic_3241553_3241651	FQ312003_intergenic_3241553_3241651	15.9515	32.8027	4.71731	0.143808	-2.79778	0.000362949	0.00544591	Downregulated
FQ312003_intergenic_3259110_3259329	FQ312003_intergenic_3259110_3259329	32.8916	69.0749	8.76942	0.126955	-2.97761	0.0135289	0.0960859	Downregulated
FQ312003_intergenic_3295662_3295985	FQ312003_intergenic_3295662_3295985	74.4183	168.68	11.5769	0.0686323	-3.86497	0.00149959	0.017052	Downregulated
FQ312003_intergenic_3369121_3369220	FQ312003_intergenic_3369121_3369220	33.0669	76.3886	4.18577	0.0547958	-4.18979	0.000748797	0.00985363	Downregulated
FQ312003_intergenic_3379260_3379595	FQ312003_intergenic_3379260_3379595	57.3807	113.405	20.0312	0.176634	-2.50117	0.000543107	0.00767286	Downregulated
FQ312003_intergenic_3417512_3417760	FQ312003_intergenic_3417512_3417760	81.8721	151.663	35.345	0.23305	-2.10129	0.00199076	0.0213011	Downregulated
FQ312003_intergenic_3434167_3435864	FQ312003_intergenic_3434167_3435864	2408.68	503.992	3678.47	7.29868	2.86763	1.16203e-08	7.90477e-07	Upregulated
FQ312003_intergenic_3532659_3532820	FQ312003_intergenic_3532659_3532820	29.8298	63.4877	7.39115	0.116419	-3.10261	0.00762574	0.0639401	Downregulated
FQ312003_intergenic_3549085_3549397	FQ312003_intergenic_3549085_3549397	96.5521	193.644	31.8244	0.164345	-2.6052	0.0116397	0.0865286	Downregulated
FQ312003_intergenic_3549969_3550232	FQ312003_intergenic_3549969_3550232	17.7531	34.5662	6.54443	0.18933	-2.40102	0.00101451	0.012377	Downregulated
FQ312003_intergenic_3587314_3593913	FQ312003_intergenic_3587314_3593913	893077	94668.2	1.42535e+06	15.0563	3.91229	2.27038e-05	0.000528335	Upregulated
FQ312003_intergenic_3636871_3637077	FQ312003_intergenic_3636871_3637077	49.1191	101.496	14.2014	0.139921	-2.83732	0.000683925	0.00913881	Downregulated
FQ312003_intergenic_3758154_3758298	FQ312003_intergenic_3758154_3758298	56.3972	111.743	19.4996	0.174503	-2.51867	3.27803e-05	0.000710821	Downregulated
FQ312003_intergenic_3778136_3778340	FQ312003_intergenic_3778136_3778340	17.4872	36.6421	4.71731	0.12874	-2.95746	0.00924753	0.0727212	Downregulated
FQ312003_intergenic_3781840_3782126	FQ312003_intergenic_3781840_3782126	248.527	558.208	42.0725	0.0753707	-3.72985	6.28504e-07	2.53225e-05	Downregulated
FQ312003_intergenic_3787358_3787438	FQ312003_intergenic_3787358_3787438	7.60714	0.855146	12.1085	14.1595	3.8237	9.39912e-05	0.00170886	Upregulated
FQ312003_intergenic_3858730_3859000	FQ312003_intergenic_3858730_3859000	17.0467	35.5408	4.71731	0.13273	-2.91344	0.000143801	0.00246997	Downregulated
FQ312003_intergenic_3969653_3970250	FQ312003_intergenic_3969653_3970250	76.6834	173.546	12.1085	0.069771	-3.84123	0.003301	0.0316382	Downregulated
FQ312003_intergenic_4031699_4031898	FQ312003_intergenic_4031699_4031898	61.4678	118.342	23.5517	0.199014	-2.32906	0.000318563	0.00488089	Downregulated
FQ312003_intergenic_412054_412098	FQ312003_intergenic_412054_412098	4.56514	0.326109	7.39115	22.6647	4.50237	0.000956226	0.0118167	Upregulated
FQ312003_intergenic_4121009_4127039	FQ312003_intergenic_4121009_4127039	888232	93553.6	1.41802e+06	15.1573	3.92194	6.35909e-06	0.000186125	Upregulated
FQ312003_intergenic_4146288_4146330	FQ312003_intergenic_4146288_4146330	50.6571	110.748	10.5965	0.0956815	-3.38562	0.000213606	0.00342558	Downregulated
FQ312003_intergenic_4146761_4147078	FQ312003_intergenic_4146761_4147078	312.278	571.412	139.521	0.244169	-2.03405	0.00393834	0.0364618	Downregulated
FQ312003_intergenic_4167601_4167861	FQ312003_intergenic_4167601_4167861	85.7087	184.225	20.0312	0.108732	-3.20115	1.50451e-05	0.000378356	Downregulated
FQ312003_intergenic_4217277_4223071	FQ312003_intergenic_4217277_4223071	887211	92418.2	1.41707e+06	15.3333	3.93859	9.56585e-06	0.000259072	Upregulated
FQ312003_intergenic_4293634_4293717	FQ312003_intergenic_4293634_4293717	12.989	4.09452	18.9187	4.62049	2.20804	0.000753872	0.00990045	Upregulated
FQ312003_intergenic_4372239_4377952	FQ312003_intergenic_4372239_4377952	888116	90775.4	1.41968e+06	15.6394	3.96712	8.05896e-06	0.000225755	Upregulated
FQ312003_intergenic_4415433_4421485	FQ312003_intergenic_4415433_4421485	890294	93113.9	1.42175e+06	15.2689	3.93253	7.5355e-06	0.000214778	Upregulated
FQ312003_intergenic_4479943_4480012	FQ312003_intergenic_4479943_4480012	37.0611	82.4375	6.8102	0.0826105	-3.59753	0.0101254	0.0781187	Downregulated
FQ312003_intergenic_4534811_4534955	FQ312003_intergenic_4534811_4534955	10.7107	0.867149	17.2731	19.9194	4.3161	6.27486e-06	0.000185405	Upregulated
FQ312003_intergenic_4553815_4553880	FQ312003_intergenic_4553815_4553880	16.238	1.80347	25.861	14.3396	3.84193	0.00863956	0.0691907	Upregulated
FQ312003_intergenic_4583972_4584118	FQ312003_intergenic_4583972_4584118	138.29	6.76687	225.972	33.3939	5.06151	9.90707e-07	3.7595e-05	Upregulated
FQ312003_intergenic_4715325_4715428	FQ312003_intergenic_4715325_4715428	33.7075	81.1294	2.09289	0.0257969	-5.27666	8.17813e-05	0.00154104	Downregulated
FQ312003_intergenic_4737505_4737545	FQ312003_intergenic_4737505_4737545	4.98867	0.587627	7.92269	13.4825	3.75302	0.00473298	0.042775	Upregulated
FQ312003_intergenic_477195_477303	FQ312003_intergenic_477195_477303	44.1062	105.457	3.20538	0.030395	-5.04002	1.8204e-05	0.000443349	Downregulated
FQ312003_intergenic_4836111_4836411	FQ312003_intergenic_4836111_4836411	112.312	261.745	12.6894	0.0484802	-4.36646	1.31035e-05	0.000340743	Downregulated
FQ312003_intergenic_4842841_4842863	FQ312003_intergenic_4842841_4842863	4.66629	0.180347	7.65692	42.4567	5.40792	0.000241799	0.00380059	Upregulated
FQ312003_intergenic_4876953_4877251	FQ312003_intergenic_4876953_4877251	106.556	239.681	17.8062	0.0742912	-3.75066	0.0125017	0.0909483	Downregulated
FQ312003_intergenic_527491_527568	FQ312003_intergenic_527491_527568	97.9243	228.317	10.996	0.048161	-4.37599	0.000408244	0.00601492	Downregulated
FQ312003_intergenic_528290_528684	FQ312003_intergenic_528290_528684	47.5839	108.745	6.8102	0.0626257	-3.9971	0.00861099	0.0690466	Downregulated
FQ312003_intergenic_737334_738299	FQ312003_intergenic_737334_738299	86.5692	159.469	37.9694	0.238099	-2.07037	0.00215685	0.0228165	Downregulated
FQ312003_intergenic_756308_756488	FQ312003_intergenic_756308_756488	105.669	232.183	21.3267	0.0918533	-3.44452	2.99427e-09	2.41279e-07	Downregulated
FQ312003_intergenic_765039_765699	FQ312003_intergenic_765039_765699	127.187	305.409	8.37155	0.0274109	-5.18911	0.00297575	0.0290759	Downregulated
FQ312003_intergenic_797045_797352	FQ312003_intergenic_797045_797352	87.5633	202.615	10.8623	0.0536106	-4.22134	9.45582e-11	1.08277e-08	Downregulated
FQ312003_intergenic_982212_982573	FQ312003_intergenic_982212_982573	6.78984	1.07979	10.5965	9.8135	3.29477	0.00251927	0.0257732	Upregulated
fruK	1-phosphofructokinase	11.4124	2.22275	17.5388	7.8906	2.98014	0.000844255	0.0108116	Upregulated
ftnA	ferritin	157.918	311.132	55.7756	0.179267	-2.47982	3.50788e-11	4.31999e-09	Downregulated
ftsB	Cell division protein ftsB homolog.	44.0011	87.6311	14.9144	0.170195	-2.55474	0.0006985	0.00922897	Downregulated
gabT	4-aminobutyrate aminotransferase	44.4485	18.4408	61.7869	3.35056	1.7444	2.90238e-06	9.40428e-05	Upregulated
galF	UTP-glucose-1-phosphate uridylyltransferase	88.9976	182.631	26.5756	0.145516	-2.78075	1.20731e-05	0.000317745	Downregulated
garD	D-galactarate dehydratase	25.9269	52.9332	7.92269	0.149673	-2.74011	2.0798e-06	7.07025e-05	Downregulated
gcvA	regulatory protein for glycine cleavage pathway	79.0546	147.286	33.5673	0.227906	-2.13349	0.00242576	0.0250521	Downregulated
gipA	putative virulence factor	86.7611	149.06	45.2285	0.303425	-1.72059	5.9295e-05	0.00115874	Downregulated
glgS	glycogen synthesis protein GlgS	172.511	402.102	19.4502	0.0483713	-4.3697	4.74297e-06	0.000146025	Downregulated
glmU	UDP-N-acetylglucosamine pyrophosphorylase	116.713	264.275	18.3377	0.0693887	-3.84915	5.49022e-09	4.02557e-07	Downregulated
glpA	anaerobic glycerol-3-phosphate dehydrogenase subunit A	597.485	1245.24	165.648	0.133025	-2.91023	1.71081e-12	2.65869e-10	Downregulated
glpB	Anaerobic glycerol-3-phosphate dehydrogenase subunit B	330.878	712.536	76.4387	0.107277	-3.22059	8.19506e-14	1.52826e-11	Downregulated
glpC	anaerobic glycerol-3-phosphate dehydrogenase subunit C	309.045	625.172	98.2938	0.157227	-2.66908	5.71644e-15	1.28659e-12	Downregulated
glpD	aerobic glycerol-3-phosphate dehydrogenase	1579.11	2935.11	675.117	0.230015	-2.1202	1.38617e-18	5.65471e-16	Downregulated
glpE	conserved hypothetical protein	21.1948	44.641	5.56404	0.12464	-3.00417	0.00244748	0.0252365	Downregulated
glpT	glycerol-3-phosphate transporter	341.618	583.224	180.548	0.309568	-1.69167	0.000951268	0.011804	Downregulated
gltD	glutamate synthase (NADPH) small chain	32.9074	11.0166	47.5013	4.31181	2.10829	1.05878e-05	0.000282068	Upregulated
gmk	5'guanylate kinase	76.1719	151.163	26.1777	0.173175	-2.5297	0.000222804	0.00352555	Downregulated
gpB	bacteriophage late control gene	38.2755	76.256	12.9552	0.169891	-2.55732	0.00587032	0.0512241	Downregulated
gpF	bacteriophage tail protein	7.33084	1.43448	11.2617	7.85073	2.97283	0.000841855	0.0108116	Upregulated
gpmB	probable phosphoglycerate mutase 2	25.3835	59.9206	2.35866	0.039363	-4.66702	0.000341659	0.00519816	Downregulated
greB	transcription elongation factor GreB	47.1309	98.1939	13.0889	0.133296	-2.90729	0.00221187	0.0233229	Downregulated
groEL	GroEL protein	1920.55	521.862	2853	5.46697	2.45074	6.84745e-09	4.91135e-07	Upregulated
groES	GroES protein	491.119	183.015	696.522	3.80583	1.92821	2.88412e-08	1.75932e-06	Upregulated
grxB	glutaredoxin 2	224.882	461.502	67.1362	0.145473	-2.78117	6.35259e-08	3.29074e-06	Downregulated
gshB	Glutathione synthetase	75.4159	135.522	35.345	0.260806	-1.93895	0.00235738	0.024501	Downregulated
gtgE	bacteriophage encoded virulence factor	76.5015	148.65	28.4027	0.191071	-2.38782	0.00053555	0.0075825	Downregulated
gtrB	putative phage glycosyl transferase	24.6035	55.2302	4.18577	0.0757878	-3.72189	0.00348864	0.0329711	Downregulated
hemB	delta-aminolevulinic acid dehydratase	134.123	251.842	55.6435	0.220946	-2.17824	0.000682918	0.00913881	Downregulated
hflK	HflK protein	179.88	73.8655	250.555	3.39205	1.76216	0.014249	0.0998724	Upregulated
hha	haemolysin expression modulating protein	325.546	794.631	12.8231	0.0161372	-5.95347	1.76446e-05	0.000434589	Downregulated
hilC	AraC-family transcriptional regulator	76.3676	160.872	20.0312	0.124516	-3.0056	0.00859087	0.0690462	Downregulated
hilD	AraC-family transcriptional regulator	390.804	924.79	34.8135	0.0376447	-4.73141	1.74207e-18	6.68853e-16	Downregulated
himD	integration host factor beta-subunit (IHF-beta)	56.2578	112.192	18.9681	0.169067	-2.56433	0.000217446	0.0034786	Downregulated
hisA	1-	29.4503	4.51294	46.0752	10.2096	3.35185	0.000695218	0.00920629	Upregulated
hisB	bifunctional histidine biosynthesis protein (imidazoleglycerol-phosphate dehydratase; histidinol phosphatase)	45.4451	20.8559	61.8379	2.96501	1.56804	2.35853e-06	7.81427e-05	Upregulated
hisI	bifunctional histidine biosynthesis bifunctional protein (phosphoribosyl-AMP cyclohydrolase / phosphoribosyl-ATP pyrophosphohydrolase)	28.3397	11.553	39.5308	3.42169	1.77471	0.0016524	0.0183421	Upregulated
hmpA	flavohemoprotein (haemoglobin-like protein)	35.2709	12.189	50.6589	4.15613	2.05524	7.61114e-07	2.94133e-05	Upregulated
hpcB	3,4-dihydroxyphenylacetate 2,3-dioxygenase	20.2852	5.56872	30.0962	5.4045	2.43416	0.000137212	0.00236927	Upregulated
hpcC	5-carboxymethyl-2-hydroxymuconate semialdehyde dehydrogenase (ec 1.2.1.-) (chms dehydrogenase)	20.6216	6.61022	29.9625	4.53275	2.18039	0.000242231	0.00380059	Upregulated
hslS	heat shock protein B	400.008	879.682	80.225	0.0911978	-3.45486	2.54879e-13	4.26562e-11	Downregulated
hslT	heat shock protein A	341.431	633.827	146.5	0.231136	-2.11319	0.0106596	0.0809011	Downregulated
htrA	protease DO precursor; heat shock protein HtrA	116.879	45.8666	164.22	3.58039	1.84011	0.0106126	0.0807311	Upregulated
htrB	lipid A biosynthesis lauroyl acyltransferase (EC 2.3.1.-) (heat shock protein)	18.1918	32.1248	8.90309	0.277141	-1.85131	0.00784612	0.0650719	Downregulated
hyaD2	hydrogenase 1 maturation protease	31.0051	11.1406	44.2481	3.97179	1.98979	3.21288e-06	0.000102796	Upregulated
hybB	probable hydrogenase-2 cytochrome b subunit	18.9016	43.7159	2.35866	0.0539542	-4.21212	0.00678422	0.0579589	Downregulated
hypB	hydrogenase isoenzymes formation protein HypB	237.753	406.329	125.369	0.308541	-1.69646	0.00259131	0.0264105	Downregulated
ilvA	threonine deaminase	37.3135	9.27397	56.0065	6.03911	2.59434	2.65472e-06	8.75119e-05	Upregulated
ilvD	dihydroxyacid dehydratase	38.4145	16.3095	53.1512	3.25892	1.70439	0.00579457	0.0507667	Upregulated
infB	protein chain initiation factor 2	282.782	111.553	396.935	3.55825	1.83117	0.000599106	0.00823235	Upregulated
invA	secretory apparatus of type III secretion system	72.4336	165.189	10.5965	0.0641479	-3.96245	0.00334487	0.031899	Downregulated
invH	outer membrane lipoprotein	135.311	322.384	10.5965	0.0328693	-4.92712	7.40457e-11	8.63029e-09	Downregulated
ispA	geranyltranstransferase	35.8825	70.7461	12.64	0.178667	-2.48465	0.00485159	0.0436465	Downregulated
ispB	octaprenyl-diphosphate synthase	77.2912	130.193	42.0231	0.322775	-1.6314	0.00800878	0.0660017	Downregulated
ivbL	ilvBN operon attenuator peptide	18.7869	4.16511	28.5348	6.85091	2.7763	4.18289e-06	0.000132533	Upregulated
kdgR	transcriptional regulator KdgR	61.0547	126.925	17.141	0.135048	-2.88846	2.52029e-05	0.000573168	Downregulated
kdsB	3-deoxy-manno-octulosonate cytidylyltransferase	39.3016	69.876	18.9187	0.270746	-1.88499	0.00155508	0.0175606	Downregulated
lasT	putative RNA methyltransferase	28.3483	57.5161	8.90309	0.154793	-2.69159	0.0125129	0.0909483	Downregulated
leuD	3-isopropylmalate dehydratase small subunit	14.6526	2.84638	22.5235	7.91302	2.98423	1.10464e-06	4.05056e-05	Upregulated
leuL	leu operon leader peptide	3.99893	0.579337	6.27866	10.8377	3.43798	0.00427244	0.039166	Upregulated
lipB	lipoate-protein ligase B (lipoate biosynthesis protein B)	33.1258	73.1984	6.41076	0.0875806	-3.51324	2.21639e-05	0.000519452	Downregulated
livH	high-affinity branched-chain amino acid transport system permease protein	20.1677	4.47779	30.6277	6.83991	2.77398	1.4256e-06	5.15292e-05	Upregulated
lspA	lipoprotein signal peptidase	44.0713	16.0991	62.7195	3.89583	1.96193	2.8384e-05	0.000632294	Upregulated
maa	maltose O-acetyltransferase	95.7994	201.504	25.3294	0.125702	-2.99192	6.66208e-06	0.000192404	Downregulated
manZ	phosphotransferase enzyme II, D component	94.6208	39.2283	131.549	3.35342	1.74563	4.04579e-08	2.23787e-06	Upregulated
marA	multiple antibiotic resistance protein MarA	22.0215	51.9145	2.09289	0.0403141	-4.63257	0.00877204	0.0699086	Downregulated
marR	multiple antibiotic resistance protein MarR	25.6092	60.8836	2.09289	0.0343752	-4.86249	0.00319306	0.030739	Downregulated
mdoC	Glucans biosynthesis protein C	32.6311	65.6828	10.5965	0.161329	-2.63192	0.00600698	0.0522767	Downregulated
mdoG	Glucans biosynthesis protein G precursor.	424.526	888.16	115.436	0.129972	-2.94372	1.21059e-20	7.18322e-18	Downregulated
melR	melibiose operon regulatory protein	110.729	222.062	36.5069	0.1644	-2.60472	6.712e-05	0.00129613	Downregulated
metA	homoserine O-succinyltransferase	20.6631	37.5057	9.43463	0.251552	-1.99107	0.00158711	0.0177685	Downregulated
mgsA	methylglyoxal synthase	38.3932	68.4764	18.3377	0.267796	-1.90079	2.39585e-05	0.000551892	Downregulated
minC	Probable septum site-determining protein minC.	42.161	98.3266	4.71731	0.0479759	-4.38155	1.00893e-05	0.000270768	Downregulated
mltB	membrane-bound lytic transglycosylase B precursor	28.825	65.7839	4.18577	0.0636292	-3.97417	1.06813e-05	0.000283401	Downregulated
moaA	molybdenum cofactor biosynthesis protein A	42.249	78.3163	18.204	0.232443	-2.10505	3.13097e-07	1.36722e-05	Downregulated
mod	type III restriction-modification system enzyme (StyLTI) modification methylase	51.1497	83.6755	29.4658	0.352143	-1.50577	3.0555e-05	0.000678341	Downregulated
motA	motility protein A	54.9913	124.324	8.76942	0.0705367	-3.82548	1.88024e-05	0.000454531	Downregulated
motB	motility protein B	50.0044	121.473	2.35866	0.0194171	-5.68653	5.43191e-06	0.000164139	Downregulated
mscL	large-conductance mechanosensitive channel	180.737	428.672	15.4475	0.0360358	-4.79443	3.74952e-10	3.74814e-08	Downregulated
msyB	acidic protein MsyB; multicopy suppressor of SecY	66.1189	109.74	37.0385	0.337512	-1.56699	0.00180694	0.0196565	Downregulated
mtlR	mannitol operon repressor (mannitol repressor protein)	57.4768	128.27	10.2813	0.080154	-3.64108	2.30087e-05	0.000532544	Downregulated
mukB	cell division protein	172.474	34.3489	264.558	7.70207	2.94525	0.000150707	0.00256163	Upregulated
murG	UDP-N-acetylglucosamine--N-acetylmuramyl-	23.1693	8.44369	32.9864	3.90663	1.96592	0.000131861	0.00229055	Upregulated
nagD	NagD protein	18.2313	35.363	6.8102	0.19258	-2.37647	0.0118279	0.0877278	Downregulated
nanA	N-acetylneuraminate lyase	190.065	6.61795	312.363	47.1993	5.56069	8.67025e-08	4.3199e-06	Upregulated
nanT	putative sialic acid transporter	163.422	22.727	257.219	11.3178	3.50052	4.58435e-05	0.000932513	Upregulated
narG	respiratory nitrate reductase 1 alpha chain	345.816	28.7799	557.174	19.3599	4.275	5.17928e-05	0.0010338	Upregulated
narH	respiratory nitrate reductase 1 beta chain	19.0585	5.44325	28.1354	5.16885	2.36984	0.000223081	0.00352555	Upregulated
narK	nitrite extrusion protein (nitrite facilitator)	66.1817	5.20345	106.834	20.5314	4.35976	0.000603565	0.00827619	Upregulated
narZ	respiratory nitrate reductase 2 alpha chain	40.5388	17.8817	55.6435	3.11175	1.63773	1.75315e-06	6.15203e-05	Upregulated
nfnB	oxygen-insensitive NAD(P)H nitroreductase	65.9507	129.821	23.3702	0.180018	-2.47379	0.000368562	0.00550481	Downregulated
nhaB	regulator of intracellular pH; Na+/H+ antiporter	22.3855	49.685	4.18577	0.0842462	-3.56925	0.00727223	0.0616423	Downregulated
nirB	nitrite reductase large subunit	175.5	10.4461	285.536	27.3343	4.77264	1.36732e-14	2.70439e-12	Upregulated
nlpC	putative lipoprotein	49.8489	115.204	6.27866	0.0545002	-4.19759	0.000123959	0.00217494	Downregulated
nrdD	anaerobic ribonucleoside-triphosphate reductase	336.913	760.415	54.5789	0.0717751	-3.80037	3.9259e-35	5.12487e-32	Downregulated
nrfA	cytochrome c552, subunit of nitrite reductase complex	35.5255	79.1977	6.41076	0.0809463	-3.62689	0.00404086	0.0373579	Downregulated
nuoA	NADH dehydrogenase I chain A	150.412	294.559	54.3147	0.184393	-2.43914	0.000480514	0.00693875	Downregulated
ompF	outer membrane protein F precursor	300.582	591.655	106.533	0.18006	-2.47345	4.47367e-07	1.85985e-05	Downregulated
ompH	outer membrane protein OmpH precursor	97.9846	21.7258	148.824	6.85009	2.77612	0.00783407	0.0650546	Upregulated
opdB	oligopeptidase	92.9776	152.717	53.1512	0.348037	-1.52269	0.00829539	0.067627	Downregulated
orgAa	oxygen-regulated invasion protein	91.5266	206.643	14.7823	0.0715355	-3.8052	0.00753239	0.0634373	Downregulated
pabA	para-aminobenzoate synthase, glutamine amidotransferase component II	24.8549	52.5211	6.41076	0.122061	-3.03433	2.50679e-05	0.000572092	Downregulated
pagC	outer membrane invasion protein (PagC)	1323.75	47.3073	2174.71	45.9697	5.52261	0.000262561	0.00407063	Upregulated
parA	plasmid partition protein A	441.532	937.278	111.034	0.118465	-3.07747	9.34241e-05	0.00170444	Downregulated
pckA	phosphoenolpyruvate carboxykinase	337.089	624.965	145.171	0.232287	-2.10602	0.00486682	0.0436654	Downregulated
pduS	propanediol utilization ferredoxin	11.1518	0.573335	18.204	31.7511	4.98874	3.03022e-08	1.83132e-06	Upregulated
pez	DNA-directed RNA polymerase alpha chain	654.995	256.77	920.478	3.58483	1.84191	9.88929e-05	0.00178308	Upregulated
pflA	pyruvate formate-lyase 1 activating enzyme	107.606	179.475	59.694	0.332604	-1.58812	0.00859026	0.0690462	Downregulated
pgtP	phosphoglycerate transporter protein	48.2534	115.826	3.20538	0.0276742	-5.17531	0.00781811	0.0650048	Downregulated
phnX	phosphonoacetaldehyde phosphonohydrolase	12.6108	2.27763	19.4996	8.56138	3.09784	0.00296043	0.0289696	Upregulated
phoB	phosphate regulon transcriptional regulatory protein PhoB	87.9885	25.1902	129.854	5.15495	2.36596	1.22266e-10	1.37592e-08	Upregulated
phoN	nonspecific acid phosphatase precursor	1434.49	77.017	2339.47	30.376	4.92486	6.67939e-07	2.65832e-05	Upregulated
phoP	transcriptional regulatory protein PhoP, regulator of virulence determinants	270.331	84.5304	394.198	4.66339	2.22138	1.61773e-13	2.93304e-11	Upregulated
pipB	conserved hypothetical protein	395.054	35.9362	634.466	17.6554	4.14203	0.000200375	0.00326147	Upregulated
pitA	putative low-affinity inorganic phosphate transporter	83.8185	162.208	31.5587	0.194556	-2.36174	1.69593e-05	0.000422027	Downregulated
pldA	detergent-resistant phospholipase A	42.77	86.4943	13.6204	0.157472	-2.66684	0.000767093	0.0100136	Downregulated
plsB	glycerol-3-phosphate acyltransferase	155.101	255.209	88.3625	0.346236	-1.53017	0.000162808	0.00273879	Downregulated
plsC	1-acyl-glycerol-3-phosphate acyltransferase	26.6298	45.0743	14.3335	0.317996	-1.65292	0.00055632	0.00779506	Downregulated
pocR	pdu/cob regulatory protein PocR	69.954	145.635	19.4996	0.133893	-2.90084	0.00109476	0.0131835	Downregulated
potA	spermidine/putrescine transport ATP-binding protein PotA (ABC superfamily)	32.6473	65.7235	10.5965	0.161229	-2.63282	0.000878671	0.0111361	Downregulated
ppiA	peptidyl-prolyl cis-trans isomerase	44.0675	80.9194	19.4996	0.240976	-2.05304	0.0134974	0.0960009	Downregulated
ppk	Polyphosphate kinase	127.5	232.745	57.337	0.246351	-2.02121	6.47889e-05	0.00125483	Downregulated
pqaB	melittin resistance protein PqaB	48.2684	17.028	69.0954	4.05775	2.02068	3.48112e-09	2.7312e-07	Upregulated
prgH	type III secretion apparatus component	390.903	942.131	23.4181	0.0248565	-5.33023	0.00270905	0.0271157	Downregulated
prgK	type III secretion system apparatus	86.684	200.018	11.1281	0.0556354	-4.16785	0.000359158	0.00540143	Downregulated
prlA	preprotein translocase subunit	763.071	311.944	1063.82	3.4103	1.7699	0.0121438	0.0894615	Upregulated
proP	ProP effector	82.8039	142.232	43.185	0.303623	-1.71965	0.00421948	0.038735	Downregulated
pSLT1344_intergenic_56363_56468	pSLT1344_intergenic_56363_56468	83.9452	28.5604	120.868	4.23202	2.08135	0.00194811	0.0209478	Upregulated
pSLT1344_intergenic_65700_65996	pSLT1344_intergenic_65700_65996	133.515	4.38716	219.6	50.0551	5.64544	0.0102885	0.0786336	Upregulated
pSLT1344_intergenic_69738_69829	pSLT1344_intergenic_69738_69829	7.06547	1.76888	10.5965	5.99053	2.58268	0.0140944	0.0990249	Upregulated
pSLT1344_intergenic_75774_76166	pSLT1344_intergenic_75774_76166	45.9866	98.673	10.8623	0.110084	-3.18333	0.0026447	0.02668	Downregulated
pSLT1344_intergenic_90163_91002	pSLT1344_intergenic_90163_91002	21.3361	5.6559	31.7896	5.62061	2.49073	0.00020878	0.00337303	Upregulated
ptsG	PTS system, glucose-specific IIBC component	111.065	46.207	154.304	3.3394	1.73959	0.000221766	0.00352182	Upregulated
purU	formyltetrahydrofolate deformylase	113.756	257.68	17.8062	0.069102	-3.85513	2.02e-10	2.12654e-08	Downregulated
pykF	pyruvate kinase	61.7402	108.409	30.6277	0.28252	-1.82358	0.0132504	0.0950386	Downregulated
pyrD	dihydroorotate dehydrogenase	85.9812	178.828	24.0833	0.134673	-2.89247	1.07719e-06	3.97222e-05	Downregulated
pyrG	CTP synthase	339.394	577.911	180.382	0.312129	-1.67979	3.09549e-09	2.46393e-07	Downregulated
radA	putative DNA repair protein	23.0127	8.64891	32.5885	3.76793	1.91377	4.41471e-05	0.00091767	Upregulated
ramA	transcriptional activator RamA	57.3996	127.205	10.8623	0.0853918	-3.54976	0.00103638	0.0125967	Downregulated
rcsF	RcsF protein	60.1135	136.929	8.90309	0.0650197	-3.94298	2.07227e-07	9.59268e-06	Downregulated
recN	DNA repair protein	75.1132	138.103	33.12	0.239821	-2.05997	0.00473821	0.042775	Downregulated
repA2	DNA replication	329.705	609.848	142.943	0.234391	-2.09301	1.09676e-11	1.46092e-09	Downregulated
repC	replication protein c	901.679	1560.33	462.576	0.29646	-1.75409	0.00159274	0.0178011	Downregulated
rfaH	transcriptional activator	95.8708	216.907	15.1802	0.0699848	-3.83681	5.983e-13	9.76276e-11	Downregulated
rfc	O-antigen polymerase	589.819	973.767	333.854	0.342848	-1.54436	0.00028816	0.00445691	Downregulated
rhaB	rhamnulokinase	16.407	5.09314	23.9496	4.70232	2.23337	0.00288012	0.0284396	Upregulated
rhlB	putative ATP-dependent RNA helicase	81.9406	142.416	41.6237	0.292268	-1.77464	0.00288794	0.0284521	Downregulated
rho	transcription termination factor	1231.55	2610.75	312.08	0.119537	-3.06447	2.18933e-20	1.19081e-17	Downregulated
rhuM	putative DNA-binding protein	49.8729	92.0954	21.7246	0.235892	-2.0838	0.00266578	0.0268098	Downregulated
ribA	GTP cyclohydrolase II	51.4851	96.1259	21.7246	0.226002	-2.1456	0.00349021	0.0329711	Downregulated
ribD	riboflavin biosynthesis protein RibD	176.032	57.6436	254.958	4.423	2.14503	0.00980862	0.0761136	Upregulated
rluB	putative ribosomal large subunit pseudouridine synthase B	52.1497	98.5847	21.1931	0.214973	-2.21777	0.00310153	0.0300797	Downregulated
rnhB	ribonuclease HII	22.6193	7.06866	32.9864	4.66656	2.22236	2.40137e-05	0.000551892	Upregulated
rnpA	RNase P, protein component	104.888	237.58	16.4263	0.0691402	-3.85433	3.306e-08	1.94399e-06	Downregulated
rnt	ribonuclease T	62.2634	110.316	30.2283	0.274015	-1.86767	7.80017e-08	3.97748e-06	Downregulated
rob	right origin-binding protein	158.15	278.977	77.599	0.278156	-1.84603	0.00237922	0.0246886	Downregulated
rplB	50S ribosomal subunit protein L2	326.987	147.917	446.366	3.01768	1.59344	1.45212e-09	1.26373e-07	Upregulated
rplC	50S ribosomal subunit protein L3	280.254	99.6505	400.657	4.02062	2.00742	3.8538e-05	0.000814037	Upregulated
rplD	50S ribosomal subunit protein L4	320.388	146.515	436.304	2.97789	1.57429	8.29417e-05	0.00155563	Upregulated
rplF	50S ribosomal subunit protein L6	348.411	156.254	476.516	3.04964	1.60864	0.000849874	0.0108131	Upregulated
rplO	50S ribosomal subunit protein L15	244.369	75.1309	357.195	4.7543	2.24923	0.0123302	0.0904261	Upregulated
rplP	50S ribosomal subunit protein L16	281.418	47.2549	437.527	9.25887	3.21084	1.94757e-05	0.000467345	Upregulated
rplV	50s ribosomal protein l22	347.185	64.4496	535.676	8.31154	3.05512	1.906e-13	3.36229e-11	Upregulated
rplW	50S ribosomal subunit protein L23	199.476	63.3125	290.252	4.58443	2.19674	4.86438e-10	4.73878e-08	Upregulated
rpmC	50S ribosomal subunit protein L29	116.816	19.0541	181.99	9.55124	3.25569	0.000188025	0.00309909	Upregulated
rpmH	50s ribosomal protein l34	115.982	202.88	58.05	0.286129	-1.80526	0.00356903	0.0335181	Downregulated
rpoC	DNA-directed RNA polymerase, beta'-subunit	475.195	132.141	703.897	5.32686	2.41329	6.02044e-06	0.000179431	Upregulated
rpsC	30S ribosomal subunit protein S3	310.243	99.8463	450.507	4.51201	2.17377	0.00121965	0.014292	Upregulated
rpsL	30S ribosomal subunit protein S12	300.544	519.185	154.784	0.298129	-1.74599	4.53109e-08	2.48525e-06	Downregulated
rpsS	30S ribosomal subunit protein S19	208.038	64.5362	303.707	4.70599	2.2345	3.52939e-07	1.50564e-05	Upregulated
rtn	rtn protein	139.09	298.446	32.8527	0.110079	-3.18339	8.50199e-06	0.000236138	Downregulated
samB	putative transposase	312.789	567.687	142.857	0.251648	-1.99052	8.28236e-08	4.19062e-06	Downregulated
sbcB	exodeoxyribonuclease I	101.355	180.736	48.4339	0.267981	-1.8998	0.000178709	0.0029756	Downregulated
sdaC	putative serine transporter	401.316	734.934	178.904	0.243428	-2.03843	0.00115471	0.0136472	Downregulated
sdhC	succinate dehydrogenase cytochrome b-556 subunit	203.507	390.772	78.6637	0.201303	-2.31256	2.15852e-08	1.38824e-06	Downregulated
seqA	seqA protein	92.3467	169.828	40.6927	0.239611	-2.06123	4.47656e-05	0.000925881	Downregulated
sicP	chaperone (associated with virulence)	102.593	239.792	11.1281	0.0464073	-4.42951	2.06862e-06	7.06906e-05	Downregulated
sigD	cell invasion protein	522.067	1295.55	6.41076	0.00494828	-7.65886	3.11523e-08	1.86542e-06	Downregulated
siiE	large repetitive protein	744.772	1560.77	200.77	0.128635	-2.95864	0.00256713	0.0262217	Downregulated
sipA	pathogenicity island 1 effector protein	367.767	876.812	28.4027	0.0323931	-4.94817	9.84508e-10	8.80258e-08	Downregulated
sipB	pathogenicity island 1 effector protein	305.955	718.947	30.6277	0.0426008	-4.55298	1.46326e-10	1.59179e-08	Downregulated
sipC	pathogenicity island 1 effector protein	366.397	886.743	19.4996	0.0219902	-5.507	3.79006e-10	3.74814e-08	Downregulated
sipD	pathogenicity island 1 effector protein	126.122	309.028	4.18577	0.013545	-6.2061	1.24507e-05	0.000326369	Downregulated
sirA	invasion response-regulator	70.0729	150.068	16.7431	0.11157	-3.16397	9.77787e-09	6.86238e-07	Downregulated
SL0084	putative sulfatase	174.831	341.579	63.665	0.186384	-2.42365	0.00799054	0.0659346	Downregulated
SL0160	HNH endonuclease	270.068	632.566	28.4027	0.0449008	-4.47712	4.9896e-11	6.03094e-09	Downregulated
SL0161	conserved hypothetical protein	60.3566	127.322	15.7133	0.123414	-3.01842	1.48673e-05	0.000377582	Downregulated
SL0286	Rhs-family protein (SPI-6 associated)	380.105	806.962	95.5342	0.118387	-3.07841	0.0018732	0.020253	Downregulated
SL0286A	conserved hypothetical protein (SPI-6 associated)	34.2366	75.9755	6.41076	0.0843794	-3.56697	8.51688e-05	0.00159283	Downregulated
SL0301	conserved hypothetical protein (SPI-6 associated)	29.9662	5.40409	46.341	8.57517	3.10016	0.00576196	0.0505488	Upregulated
SL0348	putative cation transport atpase (ec 3.6.1.-)	25.6482	9.95934	36.1075	3.62549	1.85817	0.000640989	0.008698	Upregulated
SL0358	AraC-family transcriptional regulator	37.109	13.4468	52.8838	3.93282	1.97556	3.15016e-06	0.000101286	Upregulated
SL0397	probable peroxidase	1006.46	1778.94	491.477	0.276275	-1.85582	0.00021054	0.0033887	Downregulated
SL0415	putative oxidoreductase	71.1117	138.914	25.9104	0.186521	-2.42259	0.00140508	0.0160943	Downregulated
SL0459	conserved hypothetical lipoprotein	188.343	313.47	104.924	0.334718	-1.57898	0.00443372	0.040474	Downregulated
SL0464	putative membrane protein	56.6876	114.212	18.3377	0.160558	-2.63883	0.00115626	0.0136472	Downregulated
SL0555	conserved hypothetical protein	61.9977	132.821	14.7823	0.111295	-3.16754	1.97847e-06	6.81552e-05	Downregulated
SL0570	putative membrane protein	36.0516	75.1056	10.0156	0.133353	-2.90667	0.0118828	0.0880353	Downregulated
SL0600	molybdopterin-containing oxidoreductase iron-sulfur subunit	10.2282	3.39714	14.7823	4.3514	2.12148	0.00614704	0.0532825	Upregulated
SL0630	conserved hypothetical protein	18.9867	33.0425	9.61614	0.291023	-1.7808	0.00157709	0.0177171	Downregulated
SL0640	putative sigma-54 dependent transcriptional regulator	112.391	234.239	31.1592	0.133023	-2.91025	5.25365e-08	2.76537e-06	Downregulated
SL0698	putative protein	9.33045	1.15267	14.7823	12.8244	3.68082	2.6269e-05	0.000595339	Upregulated
SL0713	putative exported protein	235.654	481.901	71.4889	0.148348	-2.75294	3.25279e-15	7.86333e-13	Downregulated
SL0736	putative exported protein	74.5904	150.15	24.2169	0.161284	-2.63232	0.00104119	0.0126082	Downregulated
SL0757	putative membrane protein	30.7977	62.8423	9.43463	0.150132	-2.7357	4.12426e-07	1.72558e-05	Downregulated
SL0783	putative membrane protein	30.2901	59.0332	11.1281	0.188505	-2.40732	0.00791841	0.065505	Downregulated
SL0801	conserved hypothetical protein	27.8737	47.5108	14.7823	0.311136	-1.68438	0.0016671	0.0184115	Downregulated
SL0818	conserved hypothetical protein	57.8009	125.542	12.64	0.100683	-3.3121	8.27827e-06	0.000230907	Downregulated
SL0829	conserved hypothetical protein	503.377	1089.37	112.715	0.103468	-3.27275	3.22374e-05	0.000708464	Downregulated
SL0847	putative membrane protein	58.0321	122.109	15.3138	0.125411	-2.99527	0.00315732	0.030485	Downregulated
SL0868	probable lipoprotein	256.603	538.536	68.6481	0.127472	-2.97175	5.63751e-16	1.47184e-13	Downregulated
SL0908	putative conserved hypothetical protein	26.5576	63.2547	2.09289	0.0330867	-4.91761	0.0031446	0.0304071	Downregulated
SL0924	conserved hypothetical protein	35.6633	79.3417	6.54443	0.0824842	-3.59974	0.000817509	0.0105871	Downregulated
SL0926	conserved hypothetical protein	35.5313	72.136	11.1281	0.154265	-2.69652	0.00775003	0.0645315	Downregulated
SL0956	predicted bacteriophage protein	85.0599	169.647	28.6685	0.168989	-2.565	0.00121751	0.014292	Downregulated
SL0989	bacteriophage tail fibre assembly protein	11.7944	3.97505	17.0073	4.27851	2.09711	0.0134522	0.0959593	Upregulated
SL0992	transposase (remnant)	20.425	2.17988	32.5885	14.9497	3.90204	4.29732e-12	6.23303e-10	Upregulated
SL1008	conserved hypothetical protein	33.3207	54.8496	18.9681	0.34582	-1.53191	0.00103926	0.0126082	Downregulated
SL1009	conserved hypothetical protein	31.7358	65.9849	8.90309	0.134926	-2.88976	0.012262	0.0902301	Downregulated
SL1019	conserved hypothetical protein	57.1684	100.718	28.1354	0.279348	-1.83986	0.00349287	0.0329711	Downregulated
SL1065	putative transcriptional regulator	226.487	404.476	107.827	0.266585	-1.90733	1.11631e-08	7.75124e-07	Downregulated
SL1071	putative oxidoreductase	29.5695	58.0289	10.5965	0.182608	-2.45318	0.00374758	0.0349935	Downregulated
SL1075	putative membrane protein	29.851	10.7956	42.5546	3.94184	1.97887	1.98399e-06	6.81552e-05	Upregulated
SL1098	conserved hypothetical protein	115.091	280.652	4.71731	0.0168084	-5.89467	6.51359e-12	9.04557e-10	Downregulated
SL1147	conserved hypothetical protein	131.63	258.693	46.9219	0.181381	-2.46291	3.93135e-05	0.00082774	Downregulated
SL1150	putative TetR-family regulatory protein	394.338	891.823	62.6815	0.0702846	-3.83065	0.000353324	0.0053383	Downregulated
SL1177	predicted bacteriophage protein	65.5932	137.675	17.5388	0.127393	-2.97264	9.75128e-06	0.000263002	Downregulated
SL1187	putative heat shock protein	303.185	586.6	114.241	0.194752	-2.36029	0.000864799	0.0109816	Downregulated
SL1190	putative lipoprotein	23.557	40.7297	12.1085	0.297288	-1.75007	0.0129788	0.093565	Downregulated
SL1201	putative transcriptional regulator	37.7692	74.9903	12.9552	0.172758	-2.53317	0.00265229	0.0267153	Downregulated
SL1218	conserved hypothetical membrane protein	134.434	260.096	50.6589	0.19477	-2.36016	7.61582e-07	2.94133e-05	Downregulated
SL1220	conserved hypothetical protein	396.15	684.203	204.116	0.298326	-1.74504	0.000931857	0.0116688	Downregulated
SL1221	putative outer membrane protein	197.845	334.213	106.933	0.319954	-1.64407	0.00182099	0.0197763	Downregulated
SL1235	putative exported protein	58.6733	132.259	9.61614	0.0727068	-3.78177	2.1168e-07	9.72985e-06	Downregulated
SL1236	putative MutT-family protein	31.044	61.7151	10.5965	0.171701	-2.54203	0.0100077	0.0773934	Downregulated
SL1257	putative hydrolase	26.9665	48.1839	12.8215	0.266096	-1.90998	0.00741679	0.0625444	Downregulated
SL1259	conserved hypothetical protein	68.0966	133.317	24.6164	0.184645	-2.43717	0.000735904	0.00970353	Downregulated
SL1299	conserved hypothetical FAD-binding protein	32.0645	14.1853	43.9839	3.10066	1.63258	6.3061e-06	0.000185405	Upregulated
SL1300	conserved hypothetical protein	215.52	450.255	59.0304	0.131104	-2.93121	4.90041e-12	6.95326e-10	Downregulated
SL1304	conserved hypothetical protein	29.8934	9.75784	43.3171	4.43921	2.1503	0.0115214	0.0859427	Upregulated
SL1305	putative ABC transport ATP-binding subunit	58.0263	16.06	86.0039	5.35518	2.42093	0.00109353	0.0131835	Upregulated
SL1315	hypothetical protein	18.227	39.2889	4.18577	0.106538	-3.23056	3.82173e-05	0.000809884	Downregulated
SL1322	conserved hypothetical protein	114.241	243.672	27.9539	0.114719	-3.12382	1.59444e-06	5.68685e-05	Downregulated
SL1324	putative transcriptional regulator	147.096	46.2203	214.346	4.63749	2.21334	0.00320102	0.0307703	Upregulated
SL1345	putative pathogenicity island protein	326.005	41.3451	515.778	12.475	3.64096	0.00829925	0.067627	Upregulated
SL1364	putative secreted protein	284.099	607.006	68.8281	0.113389	-3.14064	0.000395501	0.0058536	Downregulated
SL1392	putative membrane protein	42.5503	86.7424	13.0889	0.150893	-2.7284	0.00416909	0.0383263	Downregulated
SL1411	putative membrane protein	29.7602	57.7085	11.1281	0.192833	-2.37458	0.00904834	0.071673	Downregulated
SL1431	conserved hypothetical protein	28.069	63.0966	4.71731	0.0747633	-3.74153	5.50682e-05	0.00108918	Downregulated
SL1433	putative secreted protein	68.099	111.823	38.9498	0.348318	-1.52152	1.04577e-06	3.90043e-05	Downregulated
SL1439	conserved hypothetical protein	46.2272	107.222	5.56404	0.0518927	-4.26832	4.57523e-05	0.000932513	Downregulated
SL1457	putative membrane protein	35.0569	61.334	17.5388	0.285956	-1.80613	1.56595e-05	0.000391609	Downregulated
SL1477	putative isomerase	239.591	29.7388	379.493	12.7609	3.67366	0.0082045	0.0671672	Upregulated
SL1479	plasmid stability protein	70.4375	139.694	24.2664	0.17371	-2.52524	1.98614e-07	9.32629e-06	Downregulated
SL1480	plasmid stability protein	36.0703	83.897	4.18577	0.0498918	-4.32505	3.11563e-05	0.000689346	Downregulated
SL1484	conserved hypothetical protein	31.6047	57.5117	14.3335	0.249227	-2.00447	0.0101913	0.0782571	Downregulated
SL1506	putative regulatory protein	21.7575	47.3179	4.71731	0.099694	-3.32635	2.1305e-06	7.20505e-05	Downregulated
SL1520	putative NADP-dependent oxidoreductase	65.8169	111.525	35.345	0.316925	-1.65779	0.00851028	0.0687458	Downregulated
SL1523	conserved hypothetical protein	31.7191	66.1436	8.76942	0.132581	-2.91505	8.19278e-05	0.00154104	Downregulated
SL1528	putative aldehyde dehydrogenase	192.819	60.4408	281.071	4.65036	2.21734	0.00979283	0.0760926	Upregulated
SL1529	putative regulatory protein	164.534	35.178	250.772	7.12866	2.83363	0.0131983	0.0948739	Upregulated
SL1537	putative lipoprotein	72.2532	146.575	22.705	0.154903	-2.69056	1.42895e-06	5.15292e-05	Downregulated
SL1563	putative periplasmic amino acid-binding protein	140	20.7024	219.531	10.6042	3.40656	0.00952561	0.07437	Upregulated
SL1565	ABC transporter ATP-binding subunit	26.6906	10.5696	37.4379	3.54205	1.82458	9.80323e-05	0.00177246	Upregulated
SL1568	possible methyltransferase	102.556	211.049	30.2283	0.143229	-2.80361	7.45594e-07	2.92498e-05	Downregulated
SL1573	hypothetical protein	8.63078	18.4376	2.09289	0.113512	-3.13909	0.0101578	0.0781836	Downregulated
SL1582	conserved hypothetical protein	550.122	1300.11	50.1273	0.0385561	-4.6969	2.60608e-26	2.12623e-23	Downregulated
SL1583	putative multidrug transporter	128.71	305.28	10.996	0.0360193	-4.79509	2.07739e-09	1.73835e-07	Downregulated
SL1584	putative integrase/transposase (remnant)	45.2774	103.776	6.27866	0.0605023	-4.04687	0.00646114	0.0555624	Downregulated
SL1585	conserved hypothetical protein	64.0184	115.847	29.4658	0.25435	-1.97511	0.00378146	0.0352594	Downregulated
SL1589	conserved hypothetical protein	35.0039	57.463	20.0312	0.348592	-1.52039	0.000515032	0.00731683	Downregulated
SL1592	conserved hypothetical protein	315.756	593.017	130.916	0.220762	-2.17944	2.26222e-06	7.57205e-05	Downregulated
SL1593	putative membrane protein	45.1434	89.8878	15.3138	0.170366	-2.55329	0.000987321	0.012143	Downregulated
SL1594	putative membrane protein	47.4283	93.0598	17.0073	0.182757	-2.452	0.000385664	0.00574046	Downregulated
SL1610	conserved hypothetical protein	83.9498	38.2623	114.408	2.9901	1.5802	1.17807e-06	4.29568e-05	Upregulated
SL1628	hypothetical protein	532.158	38.834	861.04	22.1723	4.47069	0.000583569	0.00809135	Upregulated
SL1636	putative regulatory protein	64.9798	138.681	15.8454	0.114257	-3.12964	7.53392e-05	0.00142947	Downregulated
SL1640	conserved hypothetical protein	24.1287	54.0432	4.18577	0.0774524	-3.69055	0.00712079	0.0605963	Downregulated
SL1652	conserved hypothetical protein	37.4592	67.5378	17.4067	0.257733	-1.95605	8.98262e-06	0.000247382	Downregulated
SL1663	putative outer membrane protein	137.168	336.64	4.18577	0.012434	-6.32957	1.31322e-18	5.65471e-16	Downregulated
SL1672	possible ion transport protein	16.6204	30.4642	7.39115	0.242617	-2.04325	0.00368084	0.0344689	Downregulated
SL1686	Hypothetical UPF0225 protein.	43.456	98.4246	6.8102	0.069192	-3.85325	6.343e-05	0.00123217	Downregulated
SL1713	conserved hypothetical protein	69.0424	123.327	32.8527	0.266387	-1.90841	0.00264291	0.02668	Downregulated
SL1726	conserved hypothetical protein	37.0507	83.0105	6.41076	0.0772283	-3.69473	4.43133e-06	0.00013773	Downregulated
SL1732	conserved hypothetical protein	322.417	634.284	114.505	0.180527	-2.46971	1.93559e-06	6.72001e-05	Downregulated
SL1741	conserved hypothetical protein	46.2945	101.983	9.16886	0.0899058	-3.47544	0.00648349	0.0556189	Downregulated
SL1752	hypothetical protein	29.6846	62.3274	7.92269	0.127114	-2.9758	0.00555563	0.04887	Downregulated
SL1783	hypothetical protein	133.458	4.92449	219.148	44.5016	5.47579	0.000585531	0.00809696	Upregulated
SL1939	predicted bacteriophage protein	12.6405	2.35193	19.4996	8.2909	3.05153	1.80381e-05	0.000441666	Upregulated
SL1941	bacteriophage tail sheath protein	18.9364	7.67801	26.4419	3.44385	1.78402	0.00301697	0.0294346	Upregulated
SL1972	putative bacteriophage protein	11.5137	2.47598	17.5388	7.0836	2.82448	0.0014375	0.0164318	Upregulated
SL1988	conserved hypothetical protein	72.3503	170.262	7.07597	0.0415593	-4.58868	0.00093728	0.0116688	Downregulated
SL2115	putative membrane protein	86.9098	40.1069	118.112	2.94493	1.55823	0.00350069	0.0329711	Upregulated
SL2211	predicted bacteriophage protein	54.0824	5.00195	86.8027	17.3538	4.11718	0.0138354	0.097837	Upregulated
SL2256	conserved hypothetical protein	529.05	151.25	780.917	5.16308	2.36823	0.000199838	0.00326086	Upregulated
SL2269	conserved hypothetical protein	51.7984	11.0277	78.9789	7.16187	2.84034	0.00148905	0.0169616	Upregulated
SL2283	putative receptor/regulator protein	129.82	311.992	8.37155	0.0268326	-5.21987	1.07494e-17	3.50808e-15	Downregulated
SL2300	putative aminotransferase	144.717	258.097	69.1302	0.267846	-1.90052	0.00415424	0.0382436	Downregulated
SL2305	conserved hypothetical protein	48.4637	87.8991	22.1735	0.25226	-1.98701	0.0139921	0.0985185	Downregulated
SL2309	putative transketolase C-terminal section	21.5628	4.4275	32.9864	7.45034	2.89731	0.00821195	0.0671672	Upregulated
SL2312	putative sugar phosphotransferase component II B	28.5825	5.88141	43.7166	7.43301	2.89395	3.29091e-10	3.39936e-08	Upregulated
SL2373	putative decarboxylase	19.0436	34.8534	8.50365	0.243983	-2.03515	0.000888034	0.0111954	Downregulated
SL2409	conserved hypothetical protein	41.491	74.4781	19.4996	0.261817	-1.93337	0.0109015	0.0823545	Downregulated
SL2430	putative cobalamin adenosyltransferase	17.4065	2.3828	27.4223	11.5084	3.52462	2.54068e-08	1.61e-06	Upregulated
SL2431	putative ethanolamine utilization protein EutQ	31.8228	1.42477	52.0881	36.559	5.19215	0.000389532	0.00577835	Upregulated
SL2432	putative ethanolamine utilization protein EutP	10.9036	0.94832	17.5404	18.4963	4.20916	3.85038e-08	2.2031e-06	Upregulated
SL2457	putative exported protein	97.549	200.669	28.8021	0.14353	-2.80057	1.70052e-05	0.000422027	Downregulated
SL2467	hypothetical protein	197.061	405.25	58.2679	0.143783	-2.79804	0.00804118	0.0661017	Downregulated
SL2468	conserved hypothetical inner membrane protein	204.32	405.835	69.977	0.172427	-2.53594	0.00153306	0.017372	Downregulated
SL2507	putative RNA methyltransferase	217.929	496.412	32.2733	0.0650131	-3.94313	2.33182e-11	3.04395e-09	Downregulated
SL2535	putative oxidoreductase	9.65932	19.3402	3.20538	0.165736	-2.59304	0.00715374	0.0607975	Downregulated
SL2537	putative transcriptional regulator	51.9224	99.7592	20.0312	0.200795	-2.3162	0.00910788	0.0720377	Downregulated
SL2548	predicted bacteriophage protein	10.3094	2.00553	15.8454	7.90085	2.98201	0.000461963	0.00668565	Upregulated
SL2594	predicted bacteriophage protein	1289.54	2982.18	161.112	0.054025	-4.21023	1.63139e-47	3.54936e-44	Downregulated
SL2623	putative lipoprotein	73.4591	137.904	30.4956	0.221136	-2.177	0.00050492	0.00721831	Downregulated
SL2644	predicted bacteriophage protein	261.928	612.016	28.5364	0.0466268	-4.4227	0.000410371	0.00603263	Downregulated
SL2659	conserved hypothetical protein	106.633	240.472	17.4067	0.0723856	-3.78815	1.65435e-07	7.93968e-06	Downregulated
SL2695	putative competence protein	39.2216	91.7753	4.18577	0.0456089	-4.45454	1.85293e-05	0.000449595	Downregulated
SL2696	predicted bacteriophage protein	61.5011	130.782	15.3138	0.117094	-3.09426	0.00333173	0.0318859	Downregulated
SL2715	hypothetical protein	98.2334	238.508	4.71731	0.0197785	-5.65993	1.0419e-06	3.90043e-05	Downregulated
SL2732	putative transcriptional regulator	20.3411	47.7134	2.09289	0.0438637	-4.51083	0.000664098	0.00893725	Downregulated
SL2738	putative hexulose 6 phosphate synthase	80.9611	186.508	10.5965	0.0568154	-4.13757	1.3141e-09	1.15907e-07	Downregulated
SL2752	putative DNA/RNA helicase	107.598	190.864	52.0881	0.272907	-1.87352	0.00106778	0.0129063	Downregulated
SL2763	exported protein	1047.91	174.784	1629.99	9.32578	3.22122	3.22095e-07	1.39226e-05	Upregulated
SL2772	putative membrane protein	21.4069	36.8252	11.1281	0.302186	-1.72649	0.00302327	0.0294521	Downregulated
SL2784	putative membrane protein	197.572	484.314	6.41076	0.0132368	-6.2393	1.78949e-09	1.51689e-07	Downregulated
SL2804	putative membrane protein	15.62	32.7713	4.18577	0.127727	-2.96887	0.00111463	0.013349	Downregulated
SL2898	DeoR-family trancriptional regulator	14.1583	28.3198	4.71731	0.166573	-2.58577	0.00166367	0.0184047	Downregulated
SL2929	SL2929	15.3668	32.1382	4.18577	0.130243	-2.94072	0.000832486	0.0107384	Downregulated
SL2944	conserved hypothetical protein	27.7613	13.0484	37.57	2.87928	1.52571	0.00240324	0.0248588	Upregulated
SL2966	putative membrane protein	31.2486	71.8429	4.18577	0.0582629	-4.10128	0.0107277	0.0813239	Downregulated
SL2990	possible regulatory protein	29.394	60.9276	8.37155	0.137402	-2.86353	7.94669e-07	3.05106e-05	Downregulated
SL3000	probable amino acid transport protein	23.6999	54.4416	3.20538	0.0588774	-4.08614	0.00131252	0.0152435	Downregulated
SL3011	hypothetical protein (assiciated with virulence)	61.3848	119.803	22.4392	0.187301	-2.41657	0.000234138	0.00369135	Downregulated
SL3012	hypothetical protein (assiciated with virulence)	70.3215	138.208	25.0637	0.181347	-2.46318	0.000182146	0.00302511	Downregulated
SL3026	conserved hypothetical protein	35.176	67.5095	13.6204	0.201755	-2.30932	0.00772858	0.0645315	Downregulated
SL3035	conserved hypothetical protein	39.3083	69.0214	19.4996	0.282515	-1.8236	0.0129058	0.0932997	Downregulated
SL3069	conserved hypothetical protein	24.6285	51.9551	6.41076	0.12339	-3.0187	0.00137371	0.0158694	Downregulated
SL3092	putative hydrolase	1970.32	37.1547	3259.1	87.7171	6.45479	2.74674e-17	8.53714e-15	Upregulated
SL3093	conserved hypothetical protein	924.948	13.3985	1532.65	114.39	6.83781	1.1891e-14	2.50362e-12	Upregulated
SL3096	arylsulfatase	40.2654	89.5769	7.39115	0.0825119	-3.59925	5.20423e-05	0.00103561	Downregulated
SL3101	conserved hypothetical protein	13.0274	4.78961	18.5192	3.86654	1.95104	0.00845981	0.0685928	Upregulated
SL3107	possible hydrolase	149.976	19.2832	237.105	12.2959	3.62011	0.0141336	0.0991933	Upregulated
SL3137	probable AraC-family trancriptional regulatory protein	49.3442	108.936	9.61614	0.088273	-3.50188	5.11782e-07	2.11418e-05	Downregulated
SL3141	conserved hypothetical protein	49.2162	102.81	13.4867	0.131181	-2.93037	0.000122864	0.00216154	Downregulated
SL3150	possible exported protein	23.0644	39.4984	12.1085	0.306556	-1.70578	0.00322376	0.0309434	Downregulated
SL3198	probable membrane transport protein	85.574	167.993	30.6277	0.182315	-2.4555	1.7128e-05	0.000423465	Downregulated
SL3199	putative membrane protein	97.904	173.506	47.5029	0.273783	-1.8689	4.89773e-05	0.000986651	Downregulated
SL3205	conserved hypothetical protein	40.3972	78.0221	15.3138	0.196276	-2.34905	0.00431872	0.0395348	Downregulated
SL3207	possible LysR-family transcriptional regulator	19.4866	41.6405	4.71731	0.113287	-3.14195	0.00334776	0.031899	Downregulated
SL3220	conserved hypothetical protein	34.8189	15.867	47.4535	2.99069	1.58048	9.63253e-05	0.00174643	Upregulated
SL3225	putative transcriptional repressor	59.4071	117.998	20.3463	0.172429	-2.53592	0.0102613	0.0785174	Downregulated
SL3245	putative acetyltransferase	69.3831	137.132	24.2169	0.176595	-2.50148	0.000574786	0.0079992	Downregulated
SL3246	conserved hypothetical protein	25.8633	56.7108	5.29827	0.093426	-3.42003	0.00974212	0.0757888	Downregulated
SL3247	putative protease	54.1068	112.296	15.3138	0.13637	-2.8744	0.000112522	0.00199573	Downregulated
SL3261	conserved hypothetical protein	47.0814	85.3147	21.5925	0.253093	-1.98226	5.46114e-07	2.2278e-05	Downregulated
SL3270	conserved hypothetical protein	67.6749	121.775	31.6081	0.259561	-1.94586	0.00774706	0.0645315	Downregulated
SL3297	conserved hypothetical protein	58.6579	141.837	3.20538	0.0225991	-5.46759	2.38844e-07	1.08918e-05	Downregulated
SL3329	LysR-family transcriptional regulator	20.8461	39.3598	8.50365	0.216049	-2.21057	0.000515664	0.00731683	Downregulated
SL3333	conserved hypothetical protein	38.1517	78.6872	11.1281	0.141422	-2.82193	0.000695373	0.00920629	Downregulated
SL3351	putative membrane protein	10.5057	21.4561	3.20538	0.149393	-2.74282	0.0034694	0.0329175	Downregulated
SL3372	conserved hypothetical protein	68.736	123.358	32.3211	0.26201	-1.9323	0.000888101	0.0111954	Downregulated
SL3378	conserved hypothetical protein	86.3948	175.725	26.8414	0.152746	-2.71079	0.0101474	0.0781836	Downregulated
SL3478	conserved hypothetical protein	148.963	267.295	70.0758	0.262167	-1.93144	0.000103135	0.00184934	Downregulated
SL3483	conserved hypothetical protein	36.0481	83.0442	4.71731	0.0568048	-4.13784	0.000416553	0.00610976	Downregulated
SL3484	conserved hypothetical protein (homologue of DnaJ: DNA damage inducible protein)	44.4089	78.4354	21.7246	0.276974	-1.85218	0.0110263	0.0830091	Downregulated
SL3499	putative dihydrodipicolinate synthetase	34.355	76.2713	6.41076	0.0840521	-3.57257	0.000136998	0.00236927	Downregulated
SL3518	hypothetical protein	210.736	444.172	55.112	0.124078	-3.01068	0.00231424	0.024168	Downregulated
SL3542	methyl-accepting chemotaxis citrate transducer	59.6993	114.121	23.4181	0.205203	-2.28487	5.55649e-05	0.00109569	Downregulated
SL3548	conserved hypothetical protein	24.8149	52.421	6.41076	0.122294	-3.03158	0.0013419	0.015557	Downregulated
SL3550	putative ABC-2 type superfamily transport protein	10.1889	20.6641	3.20538	0.155118	-2.68856	0.0045928	0.041635	Downregulated
SL3557	putative PTR2 family transport protein	44.7704	107.118	3.20538	0.0299238	-5.06256	2.79437e-06	9.11942e-05	Downregulated
SL3561	conserved hypothetical protein	40.0022	80.3721	13.0889	0.162853	-2.61836	3.45454e-08	2.0132e-06	Downregulated
SL3563	L-asparginase	23.0746	48.0704	6.41076	0.133362	-2.90658	0.0011429	0.0135631	Downregulated
SL3586	conserved hypothetical protein	31.8694	72.9962	4.45154	0.0609832	-4.03544	0.00235726	0.024501	Downregulated
SL3607	putative lipoprotein	47.5946	86.3996	21.7246	0.251443	-1.99169	1.00687e-07	4.97868e-06	Downregulated
SL3617	putative acetyltransferase	56.6701	100.542	27.4223	0.272746	-1.87437	0.0134509	0.0959593	Downregulated
SL3653	hypothetical protein	71.7771	169.827	6.41076	0.0377488	-4.72742	2.69072e-08	1.65682e-06	Downregulated
SL3673A	putative inner membrane protein (fragment)	6.29767	1.59225	9.43463	5.92535	2.5669	0.00935778	0.0732353	Upregulated
SL3724	putative exported protein	27.2351	63.2797	3.20538	0.0506541	-4.30318	0.0133568	0.0955482	Downregulated
SL3743	conserved hypothetical protein	46.6046	111.703	3.20538	0.0286954	-5.12303	0.000437355	0.00635772	Downregulated
SL3750	putative phosphoenolpyruvate-dependent sugar phosphotransferase system, eiia 2	37.2942	86.1594	4.71731	0.054751	-4.19097	0.000170452	0.00286	Downregulated
SL3751	putative GntR-family transcriptional regulator	145.822	304.46	40.0623	0.131585	-2.92594	2.06911e-05	0.000492887	Downregulated
SL3808	conserved hypothetical protein	42.1128	71.8978	22.2561	0.309552	-1.69174	0.00854879	0.0689715	Downregulated
SL3812	hypothetical protein	270.839	629.013	32.0569	0.0509639	-4.29438	2.22042e-05	0.000519452	Downregulated
SL3857	hypothetical 20.8 kDa protein in rbsr-rrsc intergenic region	23.1583	49.9484	5.29827	0.106075	-3.23685	0.0124567	0.0907418	Downregulated
SL3858	possible LysR-family transcriptional regulatory protein	38.5304	79.4333	11.2617	0.141776	-2.81831	0.00170552	0.0187406	Downregulated
SL3882	glucose-1-phosphate thymidylyltransferase	10.1444	2.39023	15.3138	6.40686	2.67962	0.00174685	0.0191303	Upregulated
SL3948	ATP/GTP-binding protein	31.1239	63.5836	9.48404	0.149159	-2.74508	8.79114e-05	0.00162549	Downregulated
SL3980	putative DNA-binding protein	23.5976	54.186	3.20538	0.0591551	-4.07935	0.000586846	0.00809797	Downregulated
SL3993	alcohol dehydrogenase	28.7319	62.2136	6.41076	0.103044	-3.27866	0.0024997	0.0256534	Downregulated
SL4006	hypothetical protein	12.9173	5.58388	17.8062	3.18885	1.67304	0.00519872	0.046292	Upregulated
SL4015	putative carbohydrate kinase	17.1119	5.38466	24.93	4.62981	2.21095	0.000953163	0.0118051	Upregulated
SL4062	PTS system protein IIB component 1 (phosphotransferase enzyme ii, b component) (ec 2.7.1.69)	16.1776	4.11852	24.2169	5.88	2.55582	2.41615e-05	0.000553342	Upregulated
SL4127	conserved hypothetical protein	67.5749	136.549	21.5925	0.158131	-2.66081	0.00147861	0.0168722	Downregulated
SL4139	hypothetical membrane protein	40.1495	84.479	10.5965	0.125434	-2.995	0.00162007	0.0180755	Downregulated
SL4146	bacteriophage tail protein	11.9753	3.63007	17.5388	4.83154	2.27248	0.00837461	0.0680711	Upregulated
SL4186	conserved hypothetical protein	72.848	140.712	27.6054	0.196184	-2.34972	4.51758e-05	0.000929397	Downregulated
SL4251	araC family regulatory protein	485.346	1203.75	6.41076	0.00532567	-7.55282	8.30151e-07	3.16865e-05	Downregulated
SL4256	putative exported protein	23.4474	1.78831	37.8868	21.1858	4.40503	0.00388905	0.0361079	Upregulated
SL4360	conserved hypothetical membrane protein	8.23954	1.63883	12.64	7.7128	2.94725	0.00140444	0.0160943	Upregulated
SL4377	conserved hypothetical protein	6.69735	1.72001	10.0156	5.82299	2.54176	0.0123715	0.0906273	Upregulated
SL4400	conserved hypothetical protein	101.425	178.37	50.1273	0.281029	-1.83121	0.00761137	0.0639375	Downregulated
SL4419	putative restriction endonuclease	51.0806	105.528	14.7823	0.140079	-2.83568	1.35703e-07	6.60993e-06	Downregulated
SL4427	putative inner membrane protein	23.0351	50.5118	4.71731	0.0933903	-3.42058	0.000662671	0.00893647	Downregulated
SL4429	conserved hypothetical protein	95.2374	218.46	13.0889	0.0599142	-4.06096	4.55634e-09	3.4183e-07	Downregulated
SL4431	hypothetical protein	44.3007	97.3972	8.90309	0.0914101	-3.4515	0.00230533	0.0241136	Downregulated
SL4433	putative inner membrane protein	114.917	258.84	18.9681	0.0732811	-3.77042	0.00168757	0.0185747	Downregulated
SL4440	conserved hypothetical protein	28.9501	65.2992	4.71731	0.0722415	-3.79103	0.00309227	0.0300346	Downregulated
SL4441	probable aspartate racemase	20.9744	49.2967	2.09289	0.0424549	-4.55792	0.0052394	0.0465273	Downregulated
SL4445	putative membrane protein	37.5477	86.7934	4.71731	0.0543511	-4.20155	0.000250006	0.00389525	Downregulated
SL4446	putative membrane protein	39.102	75.3833	14.9144	0.197848	-2.33754	1.95633e-07	9.25288e-06	Downregulated
SL4447	putative membrane protein	14.1182	29.0169	4.18577	0.144253	-2.79333	0.0013808	0.0159231	Downregulated
SL4460	hypothetical protein	22.676	39.998	11.1281	0.278216	-1.84572	0.0134898	0.0960009	Downregulated
SL4465	putative transcriptional regulatory protein	51.2604	85.1506	28.6669	0.336661	-1.57063	0.00611582	0.0531531	Downregulated
SL4471	putative sugar isomerase	60.0959	24.225	84.0098	3.4679	1.79406	5.61855e-06	0.000168222	Upregulated
SL4481	ferric iron reductase protein	10.4946	23.0972	2.09289	0.0906122	-3.46415	0.00190892	0.0205942	Downregulated
SL4501	putative outer membrane protein	27.0347	54.8312	8.50365	0.155088	-2.68884	0.00682812	0.0582577	Downregulated
SL4502	putative outer membrane protein	31.532	69.412	6.27866	0.090455	-3.46666	0.00466546	0.042235	Downregulated
SL4523	putative transcriptional regulator protein	123.035	284.618	15.3138	0.053805	-4.21612	1.4506e-07	7.01338e-06	Downregulated
SL4526	conserved hypothetical protein	399.605	908.522	60.3276	0.0664019	-3.91263	0.00130982	0.0152392	Downregulated
SLP1_0049	putative adenine-specific DNA methylase	18.697	1.59825	30.0962	18.8307	4.23501	2.82898e-11	3.55092e-09	Upregulated
SLP1_0060	predicted protein	89.3968	176.08	31.6081	0.17951	-2.47786	0.000494712	0.007128	Downregulated
SLP1_0061	putative carbonic anhydrase	1113.61	203.575	1720.31	8.45051	3.07904	5.31657e-23	3.47013e-20	Upregulated
SLP1_0064	putative phosphoribulokinase / uridine kinase family	144.097	55.2124	203.353	3.68311	1.88092	0.00628911	0.0542976	Upregulated
SLP1_0073	Not found	81.1407	153.098	33.1694	0.216655	-2.20653	7.21253e-05	0.00137248	Downregulated
SLP1_0074	putative inner membrane protein	21.1641	3.90359	32.6712	8.36951	3.06514	3.88808e-08	2.2031e-06	Upregulated
SLP1_0075	putative diguanylate cyclase/phosphodiesterase	26.0086	9.73612	36.8569	3.78559	1.92052	3.72143e-05	0.000796387	Upregulated
SLP1_0091	hypothetical protein	561.218	1234.97	112.051	0.090732	-3.46224	4.30455e-06	0.000135076	Downregulated
SLP1_0098	Not found	8.55065	0.946031	13.6204	14.3974	3.84774	9.32257e-06	0.000254596	Upregulated
SLP2_0054A	SLP2_0054A	254.697	58.7239	385.346	6.56201	2.71414	0.0018431	0.0199833	Upregulated
SLP3_0002	SLP3_0002	1218.19	2615.77	286.468	0.109516	-3.19079	1.80672e-05	0.000441666	Downregulated
slyX	conserved hypothetical protein	34.2644	69.5656	10.7302	0.154246	-2.6967	0.00959123	0.074704	Downregulated
smpA	small protein A	111.583	218.715	40.1612	0.183623	-2.44518	3.15287e-08	1.8708e-06	Downregulated
smpB	SsrA (tmRNA) -binding protein	130.699	294.958	21.1931	0.0718512	-3.79884	0.000506509	0.00721831	Downregulated
sodCI	bacteriophage encoded superoxide dismutase [cu-zn] 1 precursor (ec 1.15.1.1) (sodCI)	624.39	33.9102	1018.04	30.0218	4.90794	5.1704e-08	2.76537e-06	Upregulated
solA	N-methyl-L-tryptophan oxidase	34.8564	58.5649	19.0508	0.325293	-1.62019	0.00380281	0.0354079	Downregulated
sopA	secreted protein SopA	149.424	311.128	41.6221	0.133778	-2.90209	0.00648476	0.0556189	Downregulated
sopD2	putative sopD2 type III secretion system effector protein	623.931	53.6468	1004.12	18.7172	4.22629	0.0051695	0.0460947	Upregulated
sopE	invasion-associated secreted protein.	1562.6	3889.8	11.1281	0.00286083	-8.44935	3.18425e-18	1.15465e-15	Downregulated
sopE2	invasion-associated secreted effector protein (sopE2)	76.6899	183.379	5.56404	0.0303418	-5.04255	0.000445562	0.00646263	Downregulated
spaT	type III secretion-associated chaperone	215.889	534.915	3.20538	0.00599231	-7.38267	2.5973e-08	1.61453e-06	Downregulated
spiA	putative outer membrane secretory protein	362.849	30.9557	584.111	18.8693	4.23797	0.000957719	0.0118167	Upregulated
spiC	putative pathogenicity island 2 secreted effector protein	213.434	26.173	338.275	12.9246	3.69204	0.00272783	0.0271927	Upregulated
spvA	Salmonella plasmid virulence outer membrane protein	1291.1	46.8579	2120.6	45.256	5.50004	2.91047e-06	9.40428e-05	Upregulated
spvB	Salmonella plasmid virulence protein	1287.32	35.8879	2121.61	59.1178	5.88552	3.29126e-05	0.000711326	Upregulated
spvC	Salmonella plasmid virulence protein	236.479	8.22585	388.647	47.2471	5.56215	0.001136	0.0135305	Upregulated
spvD	putative transposase	726.908	1704.55	75.1431	0.0440837	-4.50361	6.93031e-11	8.22439e-09	Downregulated
spvR	Salmonella plasmid virulence lysR family regulator	137.194	35.1397	205.23	5.84039	2.54607	0.0052333	0.0465273	Upregulated
srmB	ATP-dependent RNA helicase SrmB	76.2672	124.697	43.9808	0.352701	-1.50348	0.00593996	0.0517625	Downregulated
ssaD	putative pathogenicity island protein	95.922	8.49795	154.205	18.1461	4.18159	0.00920001	0.0725223	Upregulated
ssaI	putative pathogenicity island protein	186.816	16.3043	300.49	18.4301	4.20399	0.0109257	0.0824416	Upregulated
ssaJ	putative pathogenicity island lipoprotein	597.513	19.7737	982.672	49.6958	5.63505	0.000144724	0.00247281	Upregulated
ssaL	putative secretion system protein	895.167	61.3327	1451.06	23.6588	4.5643	2.60528e-07	1.17273e-05	Upregulated
ssaN	type III secretion ATP synthase	472.999	39.0485	762.299	19.5218	4.28702	1.62212e-14	3.114e-12	Upregulated
ssaS	putative type III secretion protein	33.6377	4.56552	53.0191	11.6129	3.53766	0.00287289	0.0284112	Upregulated
ssaV	putative type III secretion protein	333.827	44.475	526.728	11.8432	3.56599	0.00123419	0.0144365	Upregulated
sscA	Type III secretion system chaperone protein	500.2	32.3994	812.068	25.0643	4.64756	2.83769e-05	0.000632294	Upregulated
sscB	Type III secretion system chaperone protein	269.55	14.388	439.658	30.5574	4.93345	2.21135e-13	3.79829e-11	Upregulated
sseA	T3SS chaperone	741.58	59.114	1196.56	20.2415	4.33925	3.51495e-09	2.7312e-07	Upregulated
sseB	putative pathogenicity island effector effector protein	1245.98	90.5352	2016.28	22.2707	4.47707	6.73978e-06	0.000192941	Upregulated
sseC	putative pathogenicity island effector protein	2116.4	50.6907	3493.53	68.9187	6.10682	7.31028e-38	1.19286e-34	Upregulated
sseD	putative pathogenicity island effector protein	430.526	23.6216	701.795	29.7099	4.89287	7.18276e-05	0.00137081	Upregulated
sseE	putative pathogenicity island protein	315.328	20.3777	511.962	25.1236	4.65097	1.0669e-07	5.23584e-06	Upregulated
sseF	putative pathogenicity island effector protein	89.8224	13.4025	140.769	10.5032	3.39275	0.00911647	0.0720377	Upregulated
sseI	putative type III secreted protein	184.686	19.9312	294.523	14.777	3.88528	0.000658139	0.00889373	Upregulated
sseJ	salmonella translocated effector protein (SseJ)	454.797	26.7251	740.178	27.696	4.7916	0.00232207	0.0242111	Upregulated
sspH2	secreted effector protein	286.63	28.4396	458.757	16.1309	4.01176	1.1794e-15	2.96074e-13	Upregulated
stbA	plasmid stability protein	122.578	221.236	56.8054	0.256763	-1.96149	7.68279e-06	0.000218024	Downregulated
stdB	probable outer membrane fimbrial usher protein	13.1215	2.75692	20.0312	7.26577	2.86112	5.14239e-05	0.0010311	Upregulated
stpA	tyrosine phosphatase (associated with virulence)	200.68	466.171	23.6854	0.0508084	-4.29879	4.67275e-08	2.52058e-06	Downregulated
suhB	extragenic suppressor protein SuhB	107.25	186.06	54.711	0.29405	-1.76586	0.0127055	0.0921428	Downregulated
tag	3-methyladenine DNA glycosylase I, constitutive	26.069	58.8937	4.18577	0.0710733	-3.81455	0.000597345	0.00822547	Downregulated
tagK	putative fructose-1-phosphate kinase	11.1064	2.25505	17.0073	7.54189	2.91493	0.000888496	0.0111954	Upregulated
tar	methyl-accepting chemotaxis protein II	197.012	470.357	14.7823	0.0314279	-4.99181	1.20612e-26	1.12462e-23	Downregulated
tcuA	conserved hypothetical protein	14.5582	6.3487	20.0312	3.15516	1.65771	0.0129348	0.0933909	Upregulated
thrB	Homoserine kinase	155.408	71.4088	211.408	2.96053	1.56586	2.27458e-05	0.000528335	Upregulated
tolA	tolA protein	66.8336	24.1744	95.2731	3.94107	1.97859	0.00870124	0.069514	Upregulated
torD	TorD protein	14.33	6.57563	19.4996	2.96544	1.56824	0.0124404	0.0907418	Upregulated
traL	SLP2_0069	20.1578	6.12177	29.5152	4.82135	2.26944	0.000177204	0.00295809	Upregulated
traM	SLP2_0068	25.5036	6.45616	38.2019	5.91713	2.5649	5.24015e-08	2.76537e-06	Upregulated
traU	conjugative transfer assembly protein	10.5416	2.31363	16.0269	6.92715	2.79226	0.00614674	0.0532825	Upregulated
trcD	conjugal transfer protein	94.4007	194.195	27.8712	0.143522	-2.80066	0.0011351	0.0135305	Downregulated
trpH	conserved hypothetical protein	28.9625	65.3302	4.71731	0.0722073	-3.79171	0.000499461	0.0071734	Downregulated
ttrR	putative two-component response regulator	16.8368	5.29378	24.5321	4.63414	2.2123	0.000188559	0.00310007	Upregulated
tuf	elongation factor Tu	1008.81	396.173	1417.23	3.5773	1.83887	1.67574e-06	5.94431e-05	Upregulated
ubiC	chorismate lyase	131.244	297.787	20.2142	0.0678815	-3.88084	0.00113901	0.0135415	Downregulated
ubiE	ubiquinone/menaquinone biosynthesis methyltransferase UbiE	92.0243	160.351	46.4731	0.289821	-1.78677	0.00948209	0.0741193	Downregulated
ubiG	3-demethylubiquinone-9 3-methyltransferase	121.514	268.058	23.8175	0.0888519	-3.49245	5.10029e-09	3.78291e-07	Downregulated
ucpA	putative oxidoreductase	108.497	224.102	31.4266	0.140234	-2.8341	5.38058e-06	0.000163344	Downregulated
udg	UDP-glucose 6-dehydrogenase	113.87	26.9833	171.795	6.3667	2.67055	0.00570989	0.0501595	Upregulated
udhA	possible pyridine nucleotide-disulphide oxidoreductase	311.072	664.568	75.4073	0.113468	-3.13964	2.58466e-08	1.61453e-06	Downregulated
udk	Uridine kinase	36.9017	85.9756	4.18577	0.0486856	-4.36036	0.000146839	0.0025024	Downregulated
uhpB	two-component system sensor histidine kinase	20.418	6.49991	29.6967	4.56879	2.19181	0.0062537	0.0541352	Upregulated
uhpC	regulatory protein	18.9033	5.45154	27.8712	5.11253	2.35404	8.77804e-06	0.000242772	Upregulated
uspA	universal stress protein A	1759.89	4063.58	224.102	0.0551489	-4.18052	6.44007e-06	0.000186819	Downregulated
virK	virulence protein	621.969	142.271	941.767	6.61953	2.72673	0.00303816	0.029553	Upregulated
wcaC	glycosyltransferase	18.8103	4.02535	28.6669	7.12159	2.8322	2.00573e-05	0.000479539	Upregulated
wza	putative polysaccharide export protein	15.8242	2.16558	24.93	11.5119	3.52505	1.07151e-06	3.97222e-05	Upregulated
xseA	Probable exodeoxyribonuclease VII large subunit	75.0577	148.779	25.9104	0.174154	-2.52157	7.48387e-07	2.92498e-05	Downregulated
yacA	conserved hypothetical protein	57.554	94.2051	33.12	0.351574	-1.5081	1.50716e-05	0.000378356	Downregulated
yadA	SLP2_0006	57.4933	113.686	20.0312	0.176197	-2.50474	0.000845094	0.0108116	Downregulated
yadF	carbonic anhydrase	108.038	212.542	38.3689	0.180523	-2.46974	2.08631e-05	0.000493796	Downregulated
yaeA	putative membrane protein	36.5374	85.0649	4.18577	0.0492068	-4.345	0.000615606	0.00837097	Downregulated
yaeB	SLP2_0008	53.2335	105.976	18.0719	0.170529	-2.55191	0.00452926	0.0411161	Downregulated
yafB	SLP2_0010	285.025	578.076	89.6581	0.155098	-2.68875	4.01096e-07	1.69997e-05	Downregulated
yafK	putative exported protein	112.907	261.838	13.6204	0.0520184	-4.26483	1.39842e-08	9.40981e-07	Downregulated
yajB	conserved hypothetical protein	31.9903	73.2985	4.45154	0.0607317	-4.04141	0.000343432	0.00521115	Downregulated
yajD	conserved hypothetical protein	74.5716	151.574	23.2365	0.153301	-2.70556	0.00899977	0.0715487	Downregulated
yajG	putative lipoprotein	74.0223	142.853	28.1354	0.196954	-2.34407	0.000430898	0.00627783	Downregulated
ybaJ	conserved hypothetical protein	177.649	414.475	19.7654	0.0476878	-4.39024	2.83311e-07	1.26656e-05	Downregulated
ybdG	putative membrane protein	38.0537	75.5009	13.0889	0.17336	-2.52815	0.011367	0.0850832	Downregulated
ybdO	putative lysR-family transcriptional regulator	155.631	352.753	24.2169	0.0686512	-3.86457	4.1172e-07	1.72558e-05	Downregulated
ybeD	conserved hypothetical protein	57.9569	115.643	19.4996	0.168619	-2.56816	0.000548075	0.00770967	Downregulated
ybeL	conserved hypothetical protein	32.3822	56.9869	15.9791	0.280399	-1.83445	0.0112726	0.0845703	Downregulated
ybeZ	PhoH-like ATP-binding protein	166.049	287.984	84.7593	0.294319	-1.76455	0.000153955	0.00261004	Downregulated
ybfA	putative exported protein	98.5106	195.4	33.9173	0.173579	-2.52634	0.000207481	0.00336037	Downregulated
ybiH	hypothetical tetR-family transcriptional regulator	27.3668	55.0625	8.90309	0.161691	-2.62869	0.00102204	0.0124457	Downregulated
yceB	conserved hypothetical protein	111.475	216.451	41.4916	0.19169	-2.38315	0.0123938	0.0906888	Downregulated
yceE	putative membrane transport protein	51.9093	113.878	10.5965	0.0930513	-3.42583	0.00447138	0.0407607	Downregulated
yciA	putative acyl-coA hydrolase	21.3438	50.2201	2.09289	0.0416743	-4.5847	0.00196226	0.0210652	Downregulated
yebG	conserved hypothetical protein	57.8208	117.645	17.9383	0.152478	-2.71332	0.000987884	0.012143	Downregulated
yecH	conserved hypothetical protein	30.4111	59.7343	10.8623	0.181844	-2.45923	0.00716518	0.0608155	Downregulated
yecI	ferritin-like protein	59.116	144.252	2.35866	0.0163509	-5.93448	7.8579e-10	7.22373e-08	Downregulated
yedJ	conserved hypothetical protein	10.7434	22.0506	3.20538	0.145365	-2.78225	0.00272885	0.0271927	Downregulated
yehE	conserved hypothetical protein	323.924	704.918	69.9275	0.0991996	-3.33352	0.00790688	0.0654927	Downregulated
yehS	conserved hypothetical protein	22.7415	49.7778	4.71731	0.0947674	-3.39947	0.00816823	0.0669774	Downregulated
yehW	putative permease transmembrane component	47.0276	83.5115	22.705	0.271879	-1.87897	0.000830078	0.0107285	Downregulated
yehY	putative permease transmembrane component	20.9822	36.5606	10.5965	0.289835	-1.7867	0.00206591	0.022033	Downregulated
yeiR	conserved hypothetical protein	23.1066	40.401	11.5769	0.286551	-1.80314	0.00227059	0.0237884	Downregulated
yejB	putative binding-protein-dependent transporter	45.5087	18.6751	63.3977	3.39477	1.76331	1.03816e-06	3.90043e-05	Upregulated
yejE	putative binding-protein-dependent transporter	33.2207	9.52948	49.0148	5.14349	2.36275	1.44238e-08	9.60651e-07	Upregulated
yfeC	conserved hypothetical protein	44.1022	87.6834	15.0481	0.171618	-2.54272	0.00089551	0.011262	Downregulated
yfeD	conserved hypothetical protein	31.6262	69.2489	6.54443	0.0945059	-3.40345	0.000692966	0.00920629	Downregulated
yffB	conserved hypothetical protein	41.1241	86.3162	10.996	0.127392	-2.97266	0.000386098	0.00574046	Downregulated
yfiA	putative sigma(54) modulation protein	2288.14	4949.01	514.233	0.103906	-3.26665	2.16997e-09	1.79283e-07	Downregulated
yfiD	conserved hypothetical protein	313.593	570.769	142.142	0.249037	-2.00557	3.23729e-06	0.000103072	Downregulated
ygaC	conserved hypothetical protein	83.3555	182.279	17.4067	0.0954952	-3.38843	3.50553e-07	1.5053e-05	Downregulated
ygjM	conserved hypothetical protein	168.369	388.135	21.8583	0.0563161	-4.15031	9.01816e-18	3.09797e-15	Downregulated
ygjN	conserved hypothetical protein	194.257	469.348	10.8623	0.0231434	-5.43326	1.2752e-19	5.94517e-17	Downregulated
yhdV	possible lipoprotein	11.5372	24.0349	3.20538	0.133363	-2.90657	0.00136722	0.0158224	Downregulated
yheA	bacterioferritin-associated ferredoxin	41.5471	99.0597	3.20538	0.0323581	-4.94973	4.97084e-06	0.000152322	Downregulated
yhfA	conserved hypothetical protein	73.3271	128.904	36.276	0.281419	-1.82921	4.20827e-05	0.000877551	Downregulated
yhhP	conserved hypothetical protein	26.0569	58.0662	4.71731	0.0812403	-3.62166	0.00704285	0.0600114	Downregulated
yhjK	conserved hypothetical protein	29.4105	59.3742	9.43463	0.158901	-2.6538	4.00402e-05	0.000837636	Downregulated
yhjL	putative polysaccharide biosynthesis protein subunit C	42.0325	17.2089	58.5815	3.40414	1.76729	0.0101773	0.0782414	Upregulated
yhjS	conserved hypothetical protein	98.9242	184.677	41.7558	0.226102	-2.14496	5.14999e-05	0.0010311	Downregulated
yihD	conserved hypothetical protein	86.2039	175.374	26.7571	0.152572	-2.71244	5.38622e-05	0.00106857	Downregulated
yjeK	conserved hypothetical protein	36.8905	89.0869	2.09289	0.0234927	-5.41165	2.14682e-06	7.22283e-05	Downregulated
yjeS	putative 4Fe-4S binding protein	56.8127	100.425	27.7375	0.2762	-1.85621	0.00286038	0.0283303	Downregulated
yjgF	conserved hypothetical protein	109.354	201.207	48.1187	0.23915	-2.06401	0.00290752	0.0285374	Downregulated
ylaB	hypothetical 58.9 kDa protein in tesb-hha intergenic region. Contains probable N-terminal signal sequence	46.9222	92.864	16.2942	0.175463	-2.51076	0.0003096	0.00476594	Downregulated
yliG	conserved hypothetical protein	70.3092	122.555	35.4787	0.289492	-1.7884	0.000366497	0.00548653	Downregulated
yohG	putative lipoprotein	13.9585	6.44416	18.9681	2.94345	1.55751	0.0112582	0.0845597	Upregulated
yohN	conserved hypothetical protein	55.4708	109.227	19.6333	0.179747	-2.47596	0.00114901	0.0136108	Downregulated
yrdA	putative transferase	45.4632	90.088	15.7133	0.174421	-2.51935	8.58364e-05	0.00159617	Downregulated
yrdC	conserved hypothetical protein	73.4412	150.816	21.8583	0.144934	-2.78653	9.50279e-06	0.000258436	Downregulated
