# Supplementary material for: Transcriptome and proteome analysis of Salmonella enterica serovar Typhimurium systemic infection of wild type and immune-deficient mice
Source: PLoS One. 2017 Aug 10;12(8):e0181365. doi: 10.1371/journal.pone.0181365 (PMC5552096; doi:10.1371/journal.pone.0181365)
Supplement: S5 Table — Table showing the DE genes from the Group 3 S. Typhimurium vs in vitro Input comparison. (XLS) [file pone.0181365.s005.xls]

## Sheet: Group 3 vs in vitro Input
Gene Name	Product Annotation	BaseMean	BaseMeanA	BaseMeanB	Fold Change	log2 Fold-Change	P-value	False Discovery Rate (FDR)	Effect
aceK	isocitrate dehydrogenase kinase/phosphatase	74.5296	25.1772	107.431	4.267	2.09322	8.9643e-14	1.07351e-11	Upregulated
acrR	potential acrAB operon repressor	175.279	380.928	38.1799	0.100229	-3.31863	0.000728373	0.00909	Downregulated
adiY	putative AraC family regulatory protein	121.642	276.114	18.6607	0.0675834	-3.88719	3.47097e-16	7.3327e-14	Downregulated
amiA	probable N-acetylmuramoyl-L-alanine amidase	59.9641	98.7464	34.1093	0.345423	-1.53357	0.0122926	0.092427	Downregulated
ampD	AmpD protein (anhydro-N-acetylmuramyl-tripeptide amidase)	57.7995	97.4606	31.3588	0.321759	-1.63595	0.00724462	0.0603626	Downregulated
apbA	2-dehydropantoate 2-reductase	63.3503	107.426	33.9665	0.316185	-1.66116	0.000338664	0.00489605	Downregulated
arcC	carbamate kinase	12.9189	3.64702	19.1002	5.23722	2.3888	0.00287947	0.02823	Upregulated
argC	N-acetyl-gamma-glutamyl-phosphate reductase	53.5999	101.684	21.5437	0.211869	-2.23876	0.00329677	0.0314731	Downregulated
argR	arginine repressor	92.4641	163.095	45.377	0.278224	-1.84568	0.000103845	0.00176644	Downregulated
artP	arginine transport ATP-binding protein ArtP	204.402	390.671	80.2224	0.205345	-2.28388	0.000121005	0.00202675	Downregulated
asrA	anaerobic sulfite reductase subunit A	48.7714	85.9168	24.0078	0.27943	-1.83944	0.00503578	0.0445065	Downregulated
astA	arginine N-succinyltransferase	37.6284	16.1727	51.9322	3.2111	1.68307	5.81885e-05	0.00108569	Upregulated
astB	succinylarginine dihydrolase	26.2332	4.63254	40.6336	8.77135	3.1328	1.10852e-15	2.26866e-13	Upregulated
astD	succinylglutamic semialdehyde dehydrogenase	47.3432	6.02946	74.8857	12.42	3.63459	0.000825821	0.0100095	Upregulated
astE	Succinylglutamate desuccinylase	19.6437	5.93489	28.7828	4.84977	2.27792	0.000411017	0.00567233	Upregulated
atpG	ATP synthase gamma subunit	240.323	66.9127	355.93	5.31931	2.41124	0.00969301	0.0771319	Upregulated
bioD	dethiobiotin synthetase	20.5326	1.65395	33.1184	20.0238	4.32364	2.1699e-17	5.68427e-15	Upregulated
blc	putative lipoprotein	37.9949	72.0285	15.3057	0.212495	-2.2345	0.00249066	0.0252803	Downregulated
cadC	transcriptional activator cadC	59.9419	101.927	31.9522	0.313482	-1.67354	0.00110878	0.0129429	Downregulated
caiF	transcriptional activator CaiF	109.453	239.171	22.9749	0.0960605	-3.37991	0.0119911	0.0907856	Downregulated
carA	carbamoyl-phosphate synthase small chain	122.45	261.004	30.0815	0.115253	-3.11712	0.000101914	0.00174266	Downregulated
cbiH	precorrin-3 C17-methyltransferase	27.9778	3.81032	44.0894	11.571	3.53245	0.00120421	0.0138357	Upregulated
cbiJ	cobalt-precorrin-6a reductase (ec 1.3.1.-)	30.6552	5.50475	47.4221	8.61477	3.10681	9.18221e-09	4.5904e-07	Upregulated
cbiP	putative cobyric acid synthase	58.1223	20.5988	83.1379	4.03606	2.01295	0.00147064	0.0161058	Upregulated
cbiQ	putative cobalt transport protein	14.8044	5.78436	20.8178	3.59898	1.84759	4.65298e-06	0.00012337	Upregulated
cbiT	precorrin-8W decarboxylase	19.9325	2.79299	31.3588	11.2277	3.48899	0.0100208	0.0790681	Upregulated
ccmD1	protoheme transport protein D1	5.22238	1.13932	7.94442	6.97295	2.80177	0.00139865	0.0154988	Upregulated
ccmF1	cytochrome C-type biogenesis protein	48.706	3.10086	79.1094	25.5121	4.67311	0.011796	0.0895158	Upregulated
chaB	cation transport regulator ChaB	14.4649	30.0885	4.04917	0.134575	-2.89352	0.000532216	0.00705563	Downregulated
cirA	colicin I receptor precursor	81.9044	16.1311	125.753	7.79569	2.96268	1.3108e-06	4.10737e-05	Upregulated
citG2	triphosphoribosyl-dephospho-CoA synthase	21.1128	4.62275	32.1061	6.94524	2.79603	0.00143801	0.0158278	Upregulated
creB	putative two-component response regulator	45.6711	17.0015	64.7842	3.81051	1.92998	7.17915e-08	2.86684e-06	Upregulated
crl	curlin genes transcriptional activator	66.8079	134.736	21.5223	0.159736	-2.64624	3.05594e-09	1.66778e-07	Downregulated
csgA	major curlin subunit precursor	25.0263	49.759	8.53782	0.171583	-2.54302	0.000488695	0.00653156	Downregulated
csiE	stationary phase inducible protein CsiE	84.9534	149.286	42.0648	0.281773	-1.82739	0.000994032	0.011772	Downregulated
cstA	probable carbon starvation protein	143.201	10.7079	231.529	21.6223	4.43445	0.00886528	0.0718548	Upregulated
cyaA	adenylate cyclase	426.642	702.852	242.501	0.345025	-1.53523	0.00018006	0.00284834	Downregulated
cyaY	CyaY protein	32.2443	53.4789	18.0879	0.338226	-1.56394	0.000589911	0.00768057	Downregulated
cydD	transport ATP-binding protein CydD	74.6452	124.36	41.5023	0.333728	-1.58325	0.0080024	0.0659217	Downregulated
cysB	cys regulon transcriptional activator	94.9157	201.047	24.1617	0.120179	-3.05674	8.22049e-09	4.14123e-07	Downregulated
dbh	DNA polymerase IV	84.8958	173.85	25.5929	0.147212	-2.76403	2.67733e-08	1.15679e-06	Downregulated
dcuA	anaerobic C4-dicarboxylate transporter	211.016	437.094	60.2964	0.137948	-2.8578	0.00730988	0.0606748	Downregulated
dfp	conserved hypothetical protein	178.042	296.781	98.8831	0.333186	-1.5856	7.59677e-08	2.99706e-06	Downregulated
dhaB	glycerol dehydratase large subunit	103.36	2.41639	170.655	70.624	6.14209	0.00408587	0.0373199	Upregulated
dmsA	anaerobic dimethyl sulfoxide reductase chain	154.946	258.563	85.867	0.332092	-1.59034	6.0341e-05	0.00111631	Downregulated
dmsB	anaerobic dimethyl sulfoxide reductase chain B	39.0865	87.3181	6.93213	0.0793894	-3.65491	7.23037e-07	2.36759e-05	Downregulated
dnaQ	DNA polymerase III epsilon subunit	65.0412	132.005	20.3989	0.154532	-2.69402	0.00118436	0.0136556	Downregulated
dnaT	primosomal protein I	41.625	69.5848	22.9852	0.330319	-1.59807	0.00499645	0.0442784	Downregulated
dps	DNA protection during starvation protein	1848.31	3944.71	450.702	0.114255	-3.12968	0.00410273	0.0374217	Downregulated
dsbB	Disulfide bond formation protein B	37.1835	9.233	55.8172	6.0454	2.59584	0.00390613	0.0359287	Upregulated
dut	deoxyuridine 5'-triphosphate nucleotidohydrolase	54.9097	96.969	26.8701	0.2771	-1.85152	0.00627368	0.0534978	Downregulated
ecnR	transcriptional regulatory protein	56.9429	104.199	25.439	0.244139	-2.03423	0.00614627	0.052824	Downregulated
eco	Ecotin precursor.	91.9958	222.397	5.06146	0.0227586	-5.45744	7.19557e-14	9.23996e-12	Downregulated
entA	2,3-dihydro-2,3-dihydroxybenzoate dehydrogenase	43.1405	2.8995	69.9678	24.131	4.59282	0.00138583	0.0154088	Upregulated
entC	isochorismate synthase EntC	32.8697	4.1236	52.0338	12.6186	3.65747	0.00254415	0.0256728	Upregulated
entD	enterobactin synthetase component D	17.0582	5.77456	24.5806	4.2567	2.08973	0.00263637	0.026419	Upregulated
entE	2,3-dihydroxybenzoate-AMP ligase	61.1883	4.46271	99.0053	22.185	4.47152	3.63028e-20	1.18874e-17	Upregulated
entF	enterobactin synthetase component F	126.502	14.0253	201.487	14.366	3.84458	1.33917e-11	1.09628e-09	Upregulated
envE	putative lipoprotein	132.809	244.695	58.2186	0.237923	-2.07143	1.45148e-08	6.80467e-07	Downregulated
eutA	putative ethanolamine utilization protein EutA	29.008	5.32923	44.7939	8.40532	3.0713	2.36411e-15	3.96988e-13	Upregulated
eutC	Ethanolamine ammonia-lyase light chain	35.8293	2.46069	58.075	23.6011	4.56078	0.00400814	0.0367637	Upregulated
eutE	putative aldehyde dehydrogenase	53.5585	2.73349	87.4418	31.9891	4.99951	1.4194e-07	5.31179e-06	Upregulated
eutG	putative alchohol dehydrogenase	30.6726	1.40587	50.1837	35.6959	5.15769	0.000783885	0.0096006	Upregulated
eutK	ethanolamine utilization protein EutK	28.8897	5.67729	44.3647	7.81441	2.96614	2.10453e-07	7.49053e-06	Upregulated
eutM	ethanolamine utilization protein	23.6976	1.80775	38.2909	21.1816	4.40474	3.60545e-19	1.02661e-16	Upregulated
exc	surface exclusion protein	357.941	750.867	95.9899	0.127839	-2.9676	3.55434e-21	1.55182e-18	Downregulated
exo	5'-3' exonuclease	53.773	90.4312	29.3342	0.324381	-1.62424	0.00829387	0.0679807	Downregulated
exoX	exodeoxyribonuclease X	65.3162	126.42	24.5806	0.194436	-2.36263	0.00298271	0.0289898	Downregulated
fadA	small (beta) subunit of the fatty acid-oxidizing multienzyme complex	59.1917	11.094	91.2569	8.22579	3.04015	0.0095775	0.0764915	Upregulated
fadJ	putative fatty acid oxidation complex alpha subunit	126.878	43.3495	182.563	4.21142	2.07431	0.00131082	0.0147754	Upregulated
fadR	Fatty acid metabolism regulator protein.	122.934	236.232	47.4015	0.200657	-2.3172	0.000661014	0.00843856	Downregulated
fbp	fructose-1,6-bisphosphatase	266.86	561.584	70.3764	0.125318	-2.99634	0.00379168	0.0350731	Downregulated
fdnH	formate dehydrogenase, nitrate-inducible, iron-sulfur subunit (formate dehydrogenase-n beta subunit) (fdh-n beta subunit) (anaerobic formate dehydrogenase iron-sulfur subunit)	20.8446	6.98915	30.0815	4.30403	2.10569	0.0042953	0.0388535	Upregulated
fdnI	formate dehydrogenase, nitrate-inducible, cytochrome b556(fdn) subunit (formate dehydrogenase-n gamma subunit) (fdh-n gamma subunit) (anaerobic formate dehydrogenase cytochrome b556 subunit)	40.5838	16.8911	56.3788	3.33778	1.73889	1.69689e-06	5.16881e-05	Upregulated
fimA	type-1 fimbrial protein, a chain precursor	126.732	310.755	4.04917	0.0130301	-6.26201	2.12096e-26	1.15752e-23	Downregulated
fimY	fimbriae Y protein	18.2024	41.8253	2.45377	0.0586672	-4.0913	0.00405746	0.0371641	Downregulated
fimZ	probable transcriptional regulator (FimXZ protein)	70.8025	165.718	7.52553	0.0454116	-4.46079	1.55967e-15	3.00419e-13	Downregulated
flaG	flagellin	390.948	899.964	51.6046	0.0573408	-4.12429	7.65063e-06	0.000186955	Downregulated
fldB	flavodoxin II	54.5857	109.992	17.6484	0.160453	-2.63978	0.000185476	0.0029112	Downregulated
flgK	flagellar hook-associated protein 1	170.926	340.75	57.7093	0.169359	-2.56184	1.21086e-15	2.40302e-13	Downregulated
flgM	negative regulator of flagellin synthesis (anti-sigma factor)	206.035	494.919	13.4454	0.0271668	-5.20201	1.4871e-34	1.62317e-31	Downregulated
flhD	Transcriptional activator flhD.	69.2127	135.731	24.867	0.183208	-2.44845	6.5777e-05	0.00119659	Downregulated
fliA	RNA polymerase sigma transcription factor for flagellar operon	62.0886	117.063	25.439	0.21731	-2.20218	0.00039576	0.00552783	Downregulated
fliB	lysine-N-methylase (ec 2.1.1.-) (lysine N-methyltransferase)	51.6172	103.46	17.055	0.164846	-2.60081	0.00336169	0.0319996	Downregulated
fliC	flagellin	892.605	1896.41	223.402	0.117803	-3.08556	4.12777e-13	4.58183e-11	Downregulated
fliD	flagellar hook associated protein (FliD)	553.298	1199.92	122.217	0.101855	-3.29542	5.94601e-05	0.00110313	Downregulated
fliZ	FliZ protein	47.251	94.9381	15.4596	0.162839	-2.61848	0.000115372	0.00194235	Downregulated
focA	probable formate transporter (formate channel)	327.893	684.906	89.8852	0.131237	-2.92975	0.0100445	0.0791595	Downregulated
folP	dihydropteroate synthase	40.3005	76.0279	16.4822	0.216792	-2.20562	0.00309745	0.0299146	Downregulated
fpr	ferredoxin--NADP reductase	94.1301	161.155	49.4467	0.306827	-1.7045	6.23529e-06	0.000154678	Downregulated
FQ312003.1509	FQ312003.1509	7.90399	2.39792	11.5747	4.82697	2.27112	0.00618298	0.0529972	Upregulated
FQ312003.2779	FQ312003.2779	18.1021	3.16987	28.0569	8.85112	3.14586	2.52185e-08	1.10843e-06	Upregulated
FQ312003.2802	FQ312003.2802	102.654	193.521	42.0751	0.217419	-2.20145	0.00343779	0.0324879	Downregulated
FQ312003.3325	FQ312003.3325	126.415	279.167	24.5806	0.0880496	-3.50554	1.24094e-11	1.02873e-09	Downregulated
FQ312003.3689	FQ312003.3689	99.75	208.808	27.0446	0.129519	-2.94876	0.00105003	0.0123237	Downregulated
FQ312003_intergenic_1_118	FQ312003_intergenic_1_118	11.2803	20.8395	4.90754	0.235492	-2.08625	0.00166613	0.017976	Downregulated
FQ312003_intergenic_1000151_1000308	FQ312003_intergenic_1000151_1000308	55.3964	120.501	11.9936	0.0995314	-3.3287	2.68486e-08	1.15679e-06	Downregulated
FQ312003_intergenic_1047490_1047995	FQ312003_intergenic_1047490_1047995	154.506	354.592	21.1145	0.0595459	-4.06985	0.000555549	0.00729117	Downregulated
FQ312003_intergenic_1066156_1066470	FQ312003_intergenic_1066156_1066470	52.3785	114.474	10.9813	0.095928	-3.3819	0.00122959	0.014078	Downregulated
FQ312003_intergenic_11296_11542	FQ312003_intergenic_11296_11542	54.6614	110.889	17.1764	0.154898	-2.69061	4.98441e-18	1.36012e-15	Downregulated
FQ312003_intergenic_112962_113034	FQ312003_intergenic_112962_113034	8.13975	18.8309	1.01229	0.0537568	-4.21741	0.000728699	0.00909	Downregulated
FQ312003_intergenic_1159940_1159971	FQ312003_intergenic_1159940_1159971	3.54523	0.182052	5.78735	31.7895	4.99048	0.000753152	0.0093064	Upregulated
FQ312003_intergenic_1192338_1192508	FQ312003_intergenic_1192338_1192508	18.9791	41.8036	3.76276	0.0900106	-3.47376	0.00319528	0.0306759	Downregulated
FQ312003_intergenic_1214283_1214338	FQ312003_intergenic_1214283_1214338	2.04309	0.552406	3.03688	5.49755	2.45879	0.0102468	0.0800793	Upregulated
FQ312003_intergenic_1254940_1254986	FQ312003_intergenic_1254940_1254986	6.42657	0.222809	10.5624	47.4057	5.56699	1.9858e-06	5.88462e-05	Upregulated
FQ312003_intergenic_1287948_1287978	FQ312003_intergenic_1287948_1287978	5.15942	1.62569	7.51523	4.62278	2.20876	0.000892618	0.0106674	Upregulated
FQ312003_intergenic_1289712_1290847	FQ312003_intergenic_1289712_1290847	138.796	281.088	43.9355	0.156305	-2.67756	2.57692e-05	0.000529037	Downregulated
FQ312003_intergenic_1295345_1295925	FQ312003_intergenic_1295345_1295925	81.0786	141.731	40.6439	0.286769	-1.80204	0.00557159	0.048736	Downregulated
FQ312003_intergenic_1307302_1307397	FQ312003_intergenic_1307302_1307397	10.7843	0.734458	17.4842	23.8056	4.57323	0.000148155	0.00240762	Upregulated
FQ312003_intergenic_1368214_1369004	FQ312003_intergenic_1368214_1369004	75.8124	176.295	8.82422	0.0500539	-4.32037	1.86486e-06	5.57669e-05	Downregulated
FQ312003_intergenic_1462286_1462474	FQ312003_intergenic_1462286_1462474	28.5485	65.2976	4.04917	0.062011	-4.01133	0.00020351	0.00316576	Downregulated
FQ312003_intergenic_1498890_1498988	FQ312003_intergenic_1498890_1498988	19.9601	39.0569	7.22883	0.185084	-2.43375	0.00501868	0.0444153	Downregulated
FQ312003_intergenic_1516737_1517053	FQ312003_intergenic_1516737_1517053	95.4053	224.188	9.55011	0.0425987	-4.55305	2.25622e-09	1.2629e-07	Downregulated
FQ312003_intergenic_1576510_1576585	FQ312003_intergenic_1576510_1576585	2.03178	0.524147	3.03688	5.79394	2.53455	0.00889415	0.0719997	Upregulated
FQ312003_intergenic_1583298_1583367	FQ312003_intergenic_1583298_1583367	53.1943	111.299	14.4577	0.129899	-2.94454	4.79122e-09	2.49029e-07	Downregulated
FQ312003_intergenic_1643429_1643636	FQ312003_intergenic_1643429_1643636	93.1422	172.629	40.1513	0.232588	-2.10415	1.97224e-05	0.000423883	Downregulated
FQ312003_intergenic_1677771_1678095	FQ312003_intergenic_1677771_1678095	12.0494	1.28985	19.2224	14.9029	3.89752	1.53678e-10	1.09395e-08	Upregulated
FQ312003_intergenic_1712030_1712079	FQ312003_intergenic_1712030_1712079	21.2308	49.3964	2.45377	0.0496751	-4.33133	0.000242642	0.00366143	Downregulated
FQ312003_intergenic_1799555_1799930	FQ312003_intergenic_1799555_1799930	41.727	96.0815	5.49065	0.0571457	-4.12921	0.00312145	0.0300624	Downregulated
FQ312003_intergenic_189404_189548	FQ312003_intergenic_189404_189548	31.6634	77.6401	1.01229	0.0130383	-6.2611	0.000611035	0.0079241	Downregulated
FQ312003_intergenic_1908958_1909080	FQ312003_intergenic_1908958_1909080	7.9448	2.74627	11.4105	4.15491	2.05482	0.0025428	0.0256728	Upregulated
FQ312003_intergenic_1915822_1916206	FQ312003_intergenic_1915822_1916206	44.8506	109.09	2.02458	0.0185589	-5.75175	0.00117668	0.0135909	Downregulated
FQ312003_intergenic_1979685_1980370	FQ312003_intergenic_1979685_1980370	186.441	406.917	39.4571	0.0969661	-3.36638	2.69419e-09	1.49528e-07	Downregulated
FQ312003_intergenic_1983117_1983649	FQ312003_intergenic_1983117_1983649	99.2801	218.278	19.9483	0.0913896	-3.45183	0.00154456	0.0168588	Downregulated
FQ312003_intergenic_1984308_1984757	FQ312003_intergenic_1984308_1984757	36.9078	83.5884	5.78735	0.0692363	-3.85233	0.0109843	0.0846306	Downregulated
FQ312003_intergenic_1996522_1996884	FQ312003_intergenic_1996522_1996884	27.2589	59.2674	5.91983	0.0998834	-3.32361	0.00364825	0.0340421	Downregulated
FQ312003_intergenic_2003863_2003891	FQ312003_intergenic_2003863_2003891	2.81505	0.320084	4.47836	13.9912	3.80645	0.00243745	0.0248256	Upregulated
FQ312003_intergenic_2006764_2006919	FQ312003_intergenic_2006764_2006919	28.1607	54.558	10.5624	0.193599	-2.36885	0.0120494	0.0911215	Downregulated
FQ312003_intergenic_2041561_2041744	FQ312003_intergenic_2041561_2041744	14.9751	2.97532	22.9749	7.72181	2.94894	2.05491e-11	1.60209e-09	Upregulated
FQ312003_intergenic_2079825_2080015	FQ312003_intergenic_2079825_2080015	98.3276	219.593	17.4842	0.0796212	-3.6507	0.00132558	0.0148768	Downregulated
FQ312003_intergenic_2088168_2088600	FQ312003_intergenic_2088168_2088600	51.2801	117.802	6.93213	0.0588456	-4.08692	3.93344e-08	1.63039e-06	Downregulated
FQ312003_intergenic_2090527_2090621	FQ312003_intergenic_2090527_2090621	16.9527	29.3764	8.67031	0.295146	-1.7605	0.000162776	0.00260005	Downregulated
FQ312003_intergenic_2093600_2093960	FQ312003_intergenic_2093600_2093960	299.153	613.392	89.6606	0.146172	-2.77426	0.0035674	0.0334233	Downregulated
FQ312003_intergenic_2288879_2289107	FQ312003_intergenic_2288879_2289107	24.5059	48.903	8.24112	0.16852	-2.56901	0.0108827	0.0839471	Downregulated
FQ312003_intergenic_2319859_2320148	FQ312003_intergenic_2319859_2320148	120.678	226.437	50.1726	0.221574	-2.17414	0.00971326	0.0771992	Downregulated
FQ312003_intergenic_2338323_2338550	FQ312003_intergenic_2338323_2338550	25.9213	1.29311	42.3401	32.7428	5.0331	8.55371e-27	5.09257e-24	Upregulated
FQ312003_intergenic_2352511_2352525	FQ312003_intergenic_2352511_2352525	3.54046	0.615173	5.49065	8.92537	3.15791	0.00132662	0.0148768	Upregulated
FQ312003_intergenic_2425114_2425326	FQ312003_intergenic_2425114_2425326	20.1871	4.71704	30.5004	6.46601	2.69288	2.6239e-10	1.78999e-08	Upregulated
FQ312003_intergenic_2437265_2437558	FQ312003_intergenic_2437265_2437558	60.951	134.586	11.8611	0.0881304	-3.50422	3.5252e-06	9.75024e-05	Downregulated
FQ312003_intergenic_2438830_2439660	FQ312003_intergenic_2438830_2439660	132.723	289.095	28.4758	0.0985	-3.34373	5.19454e-05	0.000980376	Downregulated
FQ312003_intergenic_2445366_2445604	FQ312003_intergenic_2445366_2445604	34.0805	82.1644	2.02458	0.0246406	-5.34282	0.00268835	0.0267921	Downregulated
FQ312003_intergenic_253893_254242	FQ312003_intergenic_253893_254242	295.64	617.923	80.7849	0.130736	-2.93527	6.08667e-13	6.52229e-11	Downregulated
FQ312003_intergenic_2541969_2542251	FQ312003_intergenic_2541969_2542251	104.949	211.423	33.9665	0.160656	-2.63795	4.42452e-07	1.51058e-05	Downregulated
FQ312003_intergenic_2619169_2619608	FQ312003_intergenic_2619169_2619608	84.8362	193.456	12.4228	0.0642148	-3.96095	0.000477166	0.00642996	Downregulated
FQ312003_intergenic_2656172_2656362	FQ312003_intergenic_2656172_2656362	36.0224	76.8197	8.82422	0.114869	-3.12194	0.00108037	0.0126346	Downregulated
FQ312003_intergenic_2681193_2681251	FQ312003_intergenic_2681193_2681251	98.9493	237.619	6.50294	0.0273671	-5.19141	1.64195e-15	3.07233e-13	Downregulated
FQ312003_intergenic_2692702_2692925	FQ312003_intergenic_2692702_2692925	12.7049	22.8825	5.91983	0.258705	-1.95062	0.00295772	0.0288246	Downregulated
FQ312003_intergenic_2786753_2786970	FQ312003_intergenic_2786753_2786970	135.739	331.111	5.49065	0.0165825	-5.9142	2.0422e-11	1.60209e-09	Downregulated
FQ312003_intergenic_2806991_2807021	FQ312003_intergenic_2806991_2807021	18.8548	44.1002	2.02458	0.0459087	-4.44509	0.00196194	0.0206239	Downregulated
FQ312003_intergenic_2893776_2894391	FQ312003_intergenic_2893776_2894391	346.324	858.218	5.06146	0.00589764	-7.40565	0.00440043	0.0397495	Downregulated
FQ312003_intergenic_2938041_2938902	FQ312003_intergenic_2938041_2938902	104.763	226.984	23.2819	0.10257	-3.28531	2.5464e-07	8.9658e-06	Downregulated
FQ312003_intergenic_2969504_2969750	FQ312003_intergenic_2969504_2969750	62.5687	131.269	16.7686	0.127743	-2.96869	6.77448e-05	0.00122898	Downregulated
FQ312003_intergenic_2970253_2970850	FQ312003_intergenic_2970253_2970850	68.6928	168.051	2.45377	0.0146013	-6.09776	0.00021238	0.00329591	Downregulated
FQ312003_intergenic_2983251_2983646	FQ312003_intergenic_2983251_2983646	26.6875	56.3206	6.93213	0.123083	-3.02229	0.0101395	0.0796204	Downregulated
FQ312003_intergenic_2996628_2996762	FQ312003_intergenic_2996628_2996762	25.4967	57.0241	4.47836	0.0785344	-3.67053	0.00356152	0.033416	Downregulated
FQ312003_intergenic_3040147_3040361	FQ312003_intergenic_3040147_3040361	82.0272	192.261	8.53782	0.0444074	-4.49306	0.00155	0.016886	Downregulated
FQ312003_intergenic_3041392_3042381	FQ312003_intergenic_3041392_3042381	108.482	247.769	15.6239	0.0630582	-3.98717	0.00497923	0.0442455	Downregulated
FQ312003_intergenic_3046708_3046937	FQ312003_intergenic_3046708_3046937	79.3911	164.89	22.3918	0.135798	-2.88046	0.00193453	0.0203838	Downregulated
FQ312003_intergenic_3121896_3122022	FQ312003_intergenic_3121896_3122022	32.2216	68.836	7.81193	0.113486	-3.13941	0.00609527	0.0526731	Downregulated
FQ312003_intergenic_3141720_3142183	FQ312003_intergenic_3141720_3142183	87.6615	184.477	23.1177	0.125315	-2.99637	0.000735164	0.00913584	Downregulated
FQ312003_intergenic_3241553_3241651	FQ312003_intergenic_3241553_3241651	24.3466	44.3791	10.9916	0.247675	-2.01348	0.000160833	0.00258261	Downregulated
FQ312003_intergenic_3266609_3267749	FQ312003_intergenic_3266609_3267749	78.805	152.121	29.9276	0.196735	-2.34567	0.012254	0.0922431	Downregulated
FQ312003_intergenic_3369121_3369220	FQ312003_intergenic_3369121_3369220	45.2887	102.823	6.93213	0.0674178	-3.89073	4.03099e-06	0.000109996	Downregulated
FQ312003_intergenic_3497969_3498016	FQ312003_intergenic_3497969_3498016	4.44889	0.922759	6.79964	7.36881	2.88143	0.00506252	0.0446826	Upregulated
FQ312003_intergenic_350141_350370	FQ312003_intergenic_350141_350370	42.7121	83.774	15.3375	0.183081	-2.44944	0.00651615	0.0551484	Downregulated
FQ312003_intergenic_3530480_3530513	FQ312003_intergenic_3530480_3530513	2.89014	0.062767	4.77506	76.0759	6.24937	0.00335622	0.031994	Upregulated
FQ312003_intergenic_3532659_3532820	FQ312003_intergenic_3532659_3532820	39.29	85.4337	8.52752	0.0998145	-3.32461	0.00198844	0.020869	Downregulated
FQ312003_intergenic_3536137_3536222	FQ312003_intergenic_3536137_3536222	23.8289	50.8912	5.78735	0.11372	-3.13644	0.00974711	0.0772807	Downregulated
FQ312003_intergenic_3536728_3536783	FQ312003_intergenic_3536728_3536783	15.5887	35.9348	2.02458	0.0563405	-4.14968	0.00145301	0.0159393	Downregulated
FQ312003_intergenic_3549969_3550232	FQ312003_intergenic_3549969_3550232	20.1665	46.7357	2.45377	0.0525032	-4.25145	3.62503e-10	2.35053e-08	Downregulated
FQ312003_intergenic_3571173_3571464	FQ312003_intergenic_3571173_3571464	22.8148	42.7273	9.53981	0.223272	-2.16312	0.000421311	0.00577232	Downregulated
FQ312003_intergenic_3624242_3624266	FQ312003_intergenic_3624242_3624266	24.2521	49.7869	7.22883	0.145195	-2.78393	0.00792099	0.0654156	Downregulated
FQ312003_intergenic_3636871_3637077	FQ312003_intergenic_3636871_3637077	63.157	136.865	14.0182	0.102423	-3.28739	4.73983e-06	0.000125166	Downregulated
FQ312003_intergenic_3657672_3657715	FQ312003_intergenic_3657672_3657715	6.9262	1.4719	10.5624	7.17603	2.84319	0.00371719	0.0345674	Upregulated
FQ312003_intergenic_3681898_3682022	FQ312003_intergenic_3681898_3682022	42.9898	92.5211	9.969	0.107748	-3.21426	0.00579565	0.0502725	Downregulated
FQ312003_intergenic_3758154_3758298	FQ312003_intergenic_3758154_3758298	89.6147	150.986	48.7002	0.322547	-1.63242	1.63771e-09	9.67774e-08	Downregulated
FQ312003_intergenic_3781840_3782126	FQ312003_intergenic_3781840_3782126	319.85	748.89	33.8237	0.0451651	-4.46865	1.17415e-05	0.000272679	Downregulated
FQ312003_intergenic_3782662_3782885	FQ312003_intergenic_3782662_3782885	27.5284	56.9044	7.94442	0.13961	-2.84053	0.0041615	0.0379049	Downregulated
FQ312003_intergenic_3825795_3825938	FQ312003_intergenic_3825795_3825938	51.4943	127.217	1.01229	0.00795719	-6.97352	4.15175e-06	0.000112355	Downregulated
FQ312003_intergenic_3850561_3850616	FQ312003_intergenic_3850561_3850616	15.549	37.354	1.01229	0.0270999	-5.20557	5.48271e-08	2.2302e-06	Downregulated
FQ312003_intergenic_3858730_3859000	FQ312003_intergenic_3858730_3859000	27.3824	48.0571	13.5993	0.282982	-1.82122	5.2117e-05	0.000980788	Downregulated
FQ312003_intergenic_3864126_3864163	FQ312003_intergenic_3864126_3864163	15.2907	32.5827	3.76276	0.115483	-3.11424	0.00408488	0.0373199	Downregulated
FQ312003_intergenic_3889221_3889237	FQ312003_intergenic_3889221_3889237	1.98157	0.398613	3.03688	7.61861	2.92953	0.00459498	0.0413359	Upregulated
FQ312003_intergenic_3923753_3923937	FQ312003_intergenic_3923753_3923937	6.40549	0.615173	10.2657	16.6875	4.0607	8.05858e-06	0.000194744	Upregulated
FQ312003_intergenic_4031699_4031898	FQ312003_intergenic_4031699_4031898	67.7851	160.352	6.07375	0.0378776	-4.72251	9.25814e-09	4.5933e-07	Downregulated
FQ312003_intergenic_408186_408201	FQ312003_intergenic_408186_408201	9.74796	20.6892	2.45377	0.118601	-3.07581	0.000276642	0.00411757	Downregulated
FQ312003_intergenic_4146288_4146330	FQ312003_intergenic_4146288_4146330	68.003	148.98	14.0182	0.0940942	-3.40975	0.000297901	0.00437434	Downregulated
FQ312003_intergenic_4146761_4147078	FQ312003_intergenic_4146761_4147078	370.093	764.792	106.961	0.139856	-2.83798	0.000547636	0.00724539	Downregulated
FQ312003_intergenic_4197221_4197259	FQ312003_intergenic_4197221_4197259	2.82635	0.348343	4.47836	12.8562	3.68439	0.00306319	0.029632	Upregulated
FQ312003_intergenic_4318205_4318502	FQ312003_intergenic_4318205_4318502	62.021	114.056	27.331	0.239628	-2.06113	0.00910897	0.0735569	Downregulated
FQ312003_intergenic_4330937_4331100	FQ312003_intergenic_4330937_4331100	18.2332	42.5462	2.02458	0.0475855	-4.39333	0.00419637	0.0381695	Downregulated
FQ312003_intergenic_4479943_4480012	FQ312003_intergenic_4479943_4480012	47.4136	110.298	5.49065	0.0497801	-4.32829	0.000788601	0.0096006	Downregulated
FQ312003_intergenic_4523161_4523622	FQ312003_intergenic_4523161_4523622	18.336	31.7612	9.3859	0.295514	-1.7587	0.000976744	0.0115882	Downregulated
FQ312003_intergenic_4534811_4534955	FQ312003_intergenic_4534811_4534955	8.18071	1.17383	12.852	10.9488	3.4527	2.04522e-05	0.000433553	Upregulated
FQ312003_intergenic_4553815_4553880	FQ312003_intergenic_4553815_4553880	12.3347	2.44819	18.9257	7.73048	2.95056	0.0018001	0.0192001	Upregulated
FQ312003_intergenic_4593013_4593213	FQ312003_intergenic_4593013_4593213	71.0765	126.726	33.9768	0.268112	-1.89909	0.0123204	0.0925304	Downregulated
FQ312003_intergenic_4595130_4595304	FQ312003_intergenic_4595130_4595304	20.0155	43.3213	4.47836	0.103375	-3.27403	1.81493e-05	0.000398858	Downregulated
FQ312003_intergenic_4655183_4655377	FQ312003_intergenic_4655183_4655377	20.5064	48.2291	2.02458	0.0419785	-4.57421	0.0134577	0.0991389	Downregulated
FQ312003_intergenic_4697342_4697421	FQ312003_intergenic_4697342_4697421	3.50882	0.0910262	5.78735	63.5789	5.99048	0.000186299	0.00291186	Upregulated
FQ312003_intergenic_4715325_4715428	FQ312003_intergenic_4715325_4715428	46.1237	109.235	4.04917	0.0370682	-4.75367	2.95786e-06	8.34957e-05	Downregulated
FQ312003_intergenic_4761868_4761904	FQ312003_intergenic_4761868_4761904	19.3288	46.8035	1.01229	0.0216286	-5.53092	0.00129153	0.0146084	Downregulated
FQ312003_intergenic_477195_477303	FQ312003_intergenic_477195_477303	57.8961	141.703	2.02458	0.0142875	-6.1291	5.77908e-08	2.33625e-06	Downregulated
FQ312003_intergenic_4776468_4776855	FQ312003_intergenic_4776468_4776855	91.8096	208.036	14.3252	0.068859	-3.86021	2.4648e-05	0.00050921	Downregulated
FQ312003_intergenic_4777565_4777973	FQ312003_intergenic_4777565_4777973	162.565	368.5	25.2747	0.0685882	-3.8659	0.00040812	0.0056507	Downregulated
FQ312003_intergenic_4836111_4836411	FQ312003_intergenic_4836111_4836411	153.995	350.741	22.8313	0.0650943	-3.94132	1.34213e-05	0.00030309	Downregulated
FQ312003_intergenic_4845562_4845670	FQ312003_intergenic_4845562_4845670	25.513	56.1904	5.06146	0.090077	-3.4727	0.000555112	0.00729117	Downregulated
FQ312003_intergenic_4874025_4874262	FQ312003_intergenic_4874025_4874262	11.5527	21.5204	4.90754	0.228041	-2.13263	0.00123203	0.0140812	Downregulated
FQ312003_intergenic_4876953_4877251	FQ312003_intergenic_4876953_4877251	132.165	319.141	7.51523	0.0235483	-5.40823	0.000681439	0.008632	Downregulated
FQ312003_intergenic_527491_527568	FQ312003_intergenic_527491_527568	128.178	304.849	10.3982	0.0341094	-4.87369	4.57163e-05	0.000883174	Downregulated
FQ312003_intergenic_528290_528684	FQ312003_intergenic_528290_528684	67.45	144.991	15.7564	0.108672	-3.20195	0.011397	0.0869918	Downregulated
FQ312003_intergenic_590568_590797	FQ312003_intergenic_590568_590797	1.97027	0.370353	3.03688	8.19994	3.03561	0.00378088	0.0350226	Upregulated
FQ312003_intergenic_603107_603567	FQ312003_intergenic_603107_603567	49.2026	118.451	3.03688	0.0256382	-5.28556	0.000711218	0.00892293	Downregulated
FQ312003_intergenic_617261_618027	FQ312003_intergenic_617261_618027	71.5598	157.213	14.4577	0.0919623	-3.44281	0.000245093	0.00368145	Downregulated
FQ312003_intergenic_660631_660711	FQ312003_intergenic_660631_660711	2.04309	0.552406	3.03688	5.49755	2.45879	0.0102468	0.0800793	Upregulated
FQ312003_intergenic_695366_695470	FQ312003_intergenic_695366_695470	9.91777	17.6318	4.77506	0.27082	-1.88459	0.00723829	0.0603626	Downregulated
FQ312003_intergenic_756308_756488	FQ312003_intergenic_756308_756488	130.104	313.344	7.94442	0.0253537	-5.30166	2.89787e-25	1.35558e-22	Downregulated
FQ312003_intergenic_765039_765699	FQ312003_intergenic_765039_765699	187.659	410.822	38.8843	0.09465	-3.40125	1.0337e-11	8.79179e-10	Downregulated
FQ312003_intergenic_797045_797352	FQ312003_intergenic_797045_797352	139.039	273.474	49.415	0.180694	-2.46838	1.95997e-12	1.88763e-10	Downregulated
FQ312003_intergenic_822759_822977	FQ312003_intergenic_822759_822977	29.7103	69.7205	3.03688	0.0435578	-4.52092	0.000287982	0.00424774	Downregulated
FQ312003_intergenic_893935_893952	FQ312003_intergenic_893935_893952	6.9099	1.43114	10.5624	7.38039	2.8837	0.00340683	0.0322884	Upregulated
fruA	PTS system, fructose-specific IIBC component	47.5761	11.3967	71.6957	6.2909	2.65327	0.00228818	0.023488	Upregulated
fruB	pts system, fructose-specific IIA/FPR component	91.5185	3.14432	150.435	47.8433	5.58025	9.91705e-05	0.00170464	Upregulated
fur	ferric uptake regulation protein	180.038	359.07	60.6827	0.169	-2.56491	1.18955e-12	1.19852e-10	Downregulated
gabD	succinate-semialdehyde dehydrogenase	47.6255	6.76606	74.8651	11.0648	3.46791	0.000156938	0.00253149	Upregulated
garD	D-galactarate dehydratase	38.8614	71.5708	17.055	0.238296	-2.06917	5.52798e-06	0.000139779	Downregulated
gcvA	regulatory protein for glycine cleavage pathway	113.418	200.264	55.5205	0.277236	-1.85081	0.00261336	0.0263306	Downregulated
gcvR	glycine cleavage system transcriptional repressor	55.3571	120.387	12.0039	0.0997109	-3.3261	1.96137e-07	7.05772e-06	Downregulated
gidB	glucose inhibited division protein	22.5864	43.031	8.95671	0.208145	-2.26434	0.00425576	0.0386024	Downregulated
glgS	glycogen synthesis protein GlgS	223.538	540.212	12.4228	0.0229961	-5.44247	1.97731e-15	3.49984e-13	Downregulated
glmU	UDP-N-acetylglucosamine pyrophosphorylase	209.567	358.659	110.172	0.307178	-1.70285	0.00226855	0.023323	Downregulated
glpA	anaerobic glycerol-3-phosphate dehydrogenase subunit A	913.8	1674.1	406.933	0.243075	-2.04052	2.1992e-09	1.2416e-07	Downregulated
gltD	glutamate synthase (NADPH) small chain	56.8005	14.8859	84.7436	5.6929	2.50916	2.41241e-20	8.31521e-18	Upregulated
gltL	glutamate/aspartate transport ATP-binding protein GltL	43.9742	16.2567	62.4526	3.84166	1.94173	0.0106254	0.0825454	Upregulated
gmk	5'guanylate kinase	109.522	204.865	45.9601	0.224343	-2.15622	0.000385698	0.00544383	Downregulated
gpB	bacteriophage late control gene	53.1559	102.721	20.1125	0.195797	-2.35257	0.000124308	0.00206622	Downregulated
gpF	bacteriophage tail protein	18.3776	1.94279	29.3342	15.099	3.91638	8.48624e-12	7.31268e-10	Upregulated
gpmB	probable phosphoglycerate mutase 2	46.8326	80.8711	24.1403	0.298503	-1.74418	5.86704e-05	0.00109157	Downregulated
greB	transcription elongation factor GreB	65.9118	132.265	21.6762	0.163884	-2.60925	6.3054e-05	0.0011567	Downregulated
gshB	Glutathione synthetase	100.42	183.845	44.8042	0.243706	-2.03678	9.90023e-05	0.00170464	Downregulated
gsp	glutathionylspermidine synthetase/amidase	98.3556	168.315	51.7157	0.307254	-1.70249	2.14716e-05	0.000450697	Downregulated
gtrA	bactoprenol-linked glucose translocase	14.5817	30.8102	3.76276	0.122127	-3.03354	1.66938e-06	5.10876e-05	Downregulated
gtrB	putative phage glycosyl transferase	45.4269	74.5186	26.0324	0.34934	-1.5173	0.00169103	0.018155	Downregulated
hemB	delta-aminolevulinic acid dehydratase	188.785	341.906	86.7047	0.253592	-1.97942	0.000857972	0.0103669	Downregulated
hexR	putative hex-regulon repressor	76.0424	136.366	35.8268	0.262726	-1.92837	4.98159e-05	0.000948384	Downregulated
hha	haemolysin expression modulating protein	444.207	1062.62	31.9316	0.0300498	-5.0565	0.000696738	0.00875804	Downregulated
hilA	invasion protein regulator	171.874	394.961	23.1494	0.0586118	-4.09267	0.00400158	0.0367551	Downregulated
hilC	AraC-family transcriptional regulator	99.85	214.503	23.4144	0.109156	-3.19553	0.00181505	0.0193281	Downregulated
hilD	AraC-family transcriptional regulator	583.59	1242.91	144.047	0.115895	-3.10911	0.000564856	0.00738372	Downregulated
hofB	protein transport protein HofB	15.2153	3.31415	23.1494	6.98501	2.80426	1.78072e-06	5.37417e-05	Upregulated
hpcC	5-carboxymethyl-2-hydroxymuconate semialdehyde dehydrogenase (ec 1.2.1.-) (chms dehydrogenase)	24.05	8.92896	34.1307	3.82247	1.93451	8.63777e-07	2.75945e-05	Upregulated
hscB	Co-chaperone protein hscB	32.9371	60.4409	14.6013	0.241579	-2.04943	0.000111408	0.0018853	Downregulated
hslS	heat shock protein B	499.045	1194.7	35.2755	0.0295267	-5.08184	2.25356e-25	1.13528e-22	Downregulated
hslT	heat shock protein A	367.794	860.944	39.0279	0.0453316	-4.46334	9.01558e-14	1.07351e-11	Downregulated
hyaF2	hydrogenase-1 operon protein HyaF2	55.6178	23.9564	76.7254	3.20271	1.67929	2.00728e-13	2.34745e-11	Upregulated
hyb0	hydrogenase-2 small chain protein	346.711	722.18	96.3985	0.133483	-2.90528	1.81206e-30	1.69531e-27	Downregulated
hycA	formate hydrogenlyase regulatory protein	2.07319	0.62767	3.03688	4.83833	2.27451	0.013306	0.0982426	Upregulated
hycC	formate hydrogenlyase subunit 3	23.7156	2.2501	38.0259	16.8997	4.07892	6.57705e-05	0.00119659	Upregulated
ilvA	threonine deaminase	33.1986	12.5224	46.9827	3.75188	1.90761	1.922e-08	8.7411e-07	Upregulated
ilvD	dihydroxyacid dehydratase	58.8441	22.0225	83.3918	3.78665	1.92092	7.32203e-11	5.328e-09	Upregulated
invB	chaperone protein for type III secretion system effectors	86.6967	202.417	9.55011	0.0471805	-4.40567	0.0013039	0.0147228	Downregulated
invH	outer membrane lipoprotein	188.475	433.458	25.1525	0.0580276	-4.10712	1.1548e-11	9.69584e-10	Downregulated
iolI1	myo-inositol catabolism protein	22.8163	5.21647	34.5496	6.62317	2.72752	0.00134477	0.0150085	Upregulated
iolT1	putative sugar transport protein	45.4457	100.179	8.95671	0.0894069	-3.48347	2.3649e-05	0.000490118	Downregulated
iroB	putative glycosyltransferase	79.0905	9.30939	125.611	13.493	3.75414	0.000650797	0.00832435	Upregulated
iroD	putative ferric enterochelin esterase	19.43	2.80903	30.5107	10.8616	3.44117	8.07036e-10	4.98611e-08	Upregulated
iroN	TonB-dependent outer membrane siderophore receptor protein	153.195	21.4889	241	11.2151	3.48737	0.00223585	0.0230591	Upregulated
ispB	octaprenyl-diphosphate synthase	91.8402	175.829	35.8474	0.203876	-2.29423	1.93924e-15	3.49984e-13	Downregulated
ivbL	ilvBN operon attenuator peptide	66.6654	5.6273	107.358	19.078	4.25384	0.000395545	0.00552783	Upregulated
katE	catalase HPII	240.079	467.502	88.4644	0.189228	-2.4018	6.65095e-09	3.4029e-07	Downregulated
kdgR	transcriptional regulator KdgR	89.417	171.949	34.3957	0.200034	-2.32168	1.21819e-05	0.000279928	Downregulated
kdsB	3-deoxy-manno-octulosonate cytidylyltransferase	49.8276	94.4311	20.0919	0.212768	-2.23265	3.1911e-08	1.33965e-06	Downregulated
kefC	glutathione-regulated potassium-efflux system protein KefC	30.4207	11.4206	43.0874	3.77278	1.91563	0.000221978	0.00338927	Upregulated
lamB	maltoporin precursor	68.2081	14.8497	103.78	6.98874	2.80503	0.0110768	0.0851432	Upregulated
lasT	putative RNA methyltransferase	38.2466	77.626	11.9936	0.154505	-2.69428	0.000214321	0.00331818	Downregulated
lctD	putative L-lactate dehydrogenase	73.026	16.2653	110.866	6.81612	2.76895	0.00176281	0.0188638	Upregulated
ldcC	lysine decarboxylase	94.9378	155.813	54.3543	0.348843	-1.51935	0.000721292	0.00903201	Downregulated
leuC2	3-isopropylmalate dehydratase large subunit 2 (ec 4.2.1.33) (isopropylmalate isomerase 2) (alpha-ipm isomerase 2) (ipmi 2). 3-isopropylmalate dehydratase large subunit 2 (ec 4.2.1.33) (isopropylmalate isomerase 2) (alpha-ipm isomerase 2) (ipmi 2)	13.7077	6.50902	18.5068	2.84326	1.50754	0.0110566	0.0850877	Upregulated
leuD	3-isopropylmalate dehydratase small subunit	22.2812	3.84781	34.5702	8.98437	3.16742	3.60019e-08	1.50176e-06	Upregulated
leuD2	3-isopropylmalate dehydratase small subunit 2 (ec 4.2.1.33) (isopropylmalate isomerase 2) (alpha-ipm isomerase 2) (ipmi 2)	28.3898	46.6807	16.1958	0.346949	-1.5272	0.00118794	0.0136728	Downregulated
lipB	lipoate-protein ligase B (lipoate biosynthesis protein B)	55.0024	99.1167	25.5929	0.258209	-1.95339	0.00863284	0.0702685	Downregulated
livH	high-affinity branched-chain amino acid transport system permease protein	25.6779	6.06695	38.7518	6.38737	2.67522	0.000744926	0.00922215	Upregulated
lplA	lipoate-protein ligase A	58.4208	113.967	21.3898	0.187683	-2.41363	0.000456195	0.00617278	Downregulated
lysA	diaminopimelate decarboxylase	32.269	9.30854	47.5761	5.11101	2.35361	1.04594e-09	6.40175e-08	Upregulated
lysP	lysine-specific permease	64.6516	108.93	35.1327	0.322525	-1.63252	5.66762e-07	1.89374e-05	Downregulated
lyxK	putative L-xylulose kinase	9.03165	1.78275	13.8643	7.77689	2.95919	3.21262e-05	0.000641447	Upregulated
maa	maltose O-acetyltransferase	140.47	271.177	53.3317	0.196667	-2.34617	1.90319e-06	5.66545e-05	Downregulated
malE	periplasmic maltose-binding protein	56.3516	17.5071	82.2478	4.69796	2.23203	0.00014124	0.00230669	Upregulated
marA	multiple antibiotic resistance protein MarA	34.0482	70.7953	9.55011	0.134897	-2.89006	0.0100739	0.0792959	Downregulated
marR	multiple antibiotic resistance protein MarR	34.5004	81.6956	3.03688	0.0371731	-4.7496	0.000868193	0.0104711	Downregulated
marT	putative transcriptional regulator (MarT)	112.211	239.976	27.0343	0.112654	-3.15002	2.86323e-05	0.000579265	Downregulated
mdoC	Glucans biosynthesis protein C	50.1654	88.5749	24.5591	0.27727	-1.85064	0.00193041	0.0203838	Downregulated
mdoG	Glucans biosynthesis protein G precursor.	544.765	1198.25	109.108	0.0910558	-3.4571	0.000160895	0.00258261	Downregulated
melR	melibiose operon regulatory protein	135.049	298.835	25.8578	0.0865289	-3.53067	2.067e-08	9.33572e-07	Downregulated
mgsA	methylglyoxal synthase	39.4679	92.5959	4.04917	0.0437294	-4.51525	1.90633e-12	1.86337e-10	Downregulated
miaE	tRNA hydroxylase	106.989	219.513	31.9736	0.145657	-2.77935	2.15451e-15	3.71313e-13	Downregulated
minC	Probable septum site-determining protein minC.	66.165	132.667	21.8301	0.164548	-2.60342	6.21851e-05	0.00114396	Downregulated
mltB	membrane-bound lytic transglycosylase B precursor	44.2887	89.0508	14.4474	0.162237	-2.62382	0.000462776	0.00624891	Downregulated
mntH	Probable manganese transport protein mntH.	73.3253	140.599	28.4758	0.202532	-2.30378	0.000411415	0.00567233	Downregulated
modE	putative molybdenum transport protein ModE	30.7422	55.169	14.4577	0.262061	-1.93203	8.11669e-07	2.6315e-05	Downregulated
mscL	large-conductance mechanosensitive channel	244.046	575.884	22.821	0.0396277	-4.65735	7.30682e-11	5.328e-09	Downregulated
msgA	putative virulence protein (MsgA)	48.5019	99.5836	14.4474	0.145078	-2.7851	0.00955502	0.0764052	Downregulated
mtlR	mannitol operon repressor (mannitol repressor protein)	94.8458	172.714	42.9335	0.248581	-2.00821	0.00012427	0.00206622	Downregulated
murC	UDP-N-acetylmuramate--L-alanine ligase	99.6759	30.6374	145.702	4.75568	2.24965	7.66404e-14	9.65227e-12	Upregulated
murD	UDP-N-acetylmuramoylalanine--D-glutamate ligase	110.958	17.6804	173.144	9.79296	3.29174	0.00486302	0.0433895	Upregulated
murF	UDP-N-acetylmuramoylalanyl-D-glutamyl-2,6-diami nopimelate--D-alan alanyl ligase	49.8156	15.4293	72.7397	4.71439	2.23707	0.000281635	0.00416601	Upregulated
nadR	conserved hypothetical transcriptional regulator	147.156	292.631	50.1726	0.171454	-2.54411	2.51997e-16	5.89403e-14	Downregulated
nam	pyrazinamidase/nicotinamidase	21.3217	8.82571	29.6523	3.35977	1.74836	0.00264242	0.0264201	Upregulated
nanA	N-acetylneuraminate lyase	105.895	8.97979	170.505	18.9877	4.24699	0.00202352	0.021102	Upregulated
napA	probable nitrate reductase	134.748	19.1934	211.784	11.0343	3.46392	8.06957e-05	0.00142128	Upregulated
narH	respiratory nitrate reductase 1 beta chain	92.1585	7.35027	148.697	20.2302	4.33844	0.00526888	0.0463789	Upregulated
narI	respiratory nitrate reductase 1 gamma chain	49.8542	14.5155	73.4133	5.05758	2.33845	0.00815083	0.0669759	Upregulated
narJ	respiratory nitrate reductase 1 delta chain	32.0209	2.44791	51.7363	21.1348	4.40155	1.61629e-07	5.94666e-06	Upregulated
narP	nitrate/nitrite response regulator protein NarP	34.7811	68.0723	12.587	0.184906	-2.43513	0.00678456	0.0570373	Downregulated
narQ	nitrate/nitrite sensor protein NarQ	70.643	145.81	20.5314	0.140809	-2.82819	1.0426e-08	5.05777e-07	Downregulated
narY	respiratory nitrate reductase 2 beta chain	38.5222	9.59057	57.81	6.0278	2.59163	0.0080157	0.0659483	Upregulated
narZ	respiratory nitrate reductase 2 alpha chain	58.9436	24.2015	82.105	3.39256	1.76237	0.00942998	0.0756825	Upregulated
nfnB	oxygen-insensitive NAD(P)H nitroreductase	96.4473	175.2	43.9458	0.250832	-1.9952	1.6533e-06	5.08331e-05	Downregulated
nikR	nickel responsive regulator	27.0366	57.8371	6.50294	0.112436	-3.15283	2.95994e-05	0.000593435	Downregulated
ninG	ninG	6.35069	2.44166	8.95671	3.66828	1.8751	0.00618297	0.0529972	Upregulated
nirB	nitrite reductase large subunit	211.254	14.0851	342.7	24.3307	4.60471	2.48589e-36	5.42671e-33	Upregulated
nlpC	putative lipoprotein	92.76	154.939	51.3071	0.331143	-1.59447	0.00569653	0.0496098	Downregulated
nrdA	ribonucleoside-diphosphate reductase 1 alpha chain	269.924	490.918	122.595	0.249726	-2.00158	0.00124886	0.0141993	Downregulated
nrdD	anaerobic ribonucleoside-triphosphate reductase	491.832	1029.25	133.555	0.12976	-2.94608	3.70006e-30	3.02896e-27	Downregulated
nrfE	formate-dependent nitrite reductase, assembly protein	53.933	10.3566	82.984	8.0127	3.00229	2.6652e-06	7.72317e-05	Upregulated
nuoM	NADH dehydrogenase I chain M	102.738	40.9151	143.954	3.51835	1.8149	0.013204	0.0978201	Upregulated
pabA	para-aminobenzoate synthase, glutamine amidotransferase component II	33.5532	71.0918	8.52752	0.119951	-3.05948	0.000788689	0.0096006	Downregulated
parA	plasmid partition protein A	551.692	1282.28	64.6311	0.0504032	-4.31034	8.31881e-07	2.67058e-05	Downregulated
pduA	putative propanediol utilization protein	17.3699	0.480126	28.6297	59.6297	5.89796	0.000240546	0.0036382	Upregulated
pduB	putative propanediol utilization protein PduB	39.3954	1.11106	64.9183	58.4292	5.86862	0.00424327	0.0385426	Upregulated
pduD	diol dehydratase medium subunit	50.5278	1.84225	82.9848	45.0453	5.4933	5.27479e-06	0.00013479	Upregulated
pduG	propanediol utilization protein	57.4826	2.90957	93.8645	32.2606	5.0117	0.0027318	0.0270659	Upregulated
pduO	propanediol utilization protein	15.5383	2.83403	24.0078	8.47125	3.08258	1.81394e-05	0.000398858	Upregulated
pduP	putative CoA-dependent proprionaldehyde dehydrogenase	30.1219	3.70978	47.73	12.866	3.68549	8.57552e-21	3.30359e-18	Upregulated
pduU	putative propanediol utilization protein PduU	11.4095	0.564903	18.6393	32.9956	5.0442	3.80744e-11	2.89941e-09	Upregulated
pduW	Acetokinase.	13.8414	5.57106	19.3549	3.47418	1.79667	0.012103	0.0913166	Upregulated
pepB	Peptidase B	60.6859	21.1971	87.0117	4.1049	2.03735	3.39709e-14	4.73353e-12	Upregulated
pepT	Peptidase T	73.9557	122.667	41.4817	0.338166	-1.5642	0.00382723	0.035352	Downregulated
pgsA	phosphotidylglycerophosphate synthetase	58.1304	109.576	23.8333	0.217504	-2.20088	0.00179471	0.0191738	Downregulated
pgtC	phosphoglycerate transport regulatory protein PgtC precursor	69.7531	121.899	34.9891	0.287033	-1.80071	0.00115187	0.0133515	Downregulated
phoB	phosphate regulon transcriptional regulatory protein PhoB	99.2293	34.107	142.644	4.18225	2.06428	1.2617e-05	0.000286905	Upregulated
phoR	phosphate regulon sensor protein PhoR	37.3635	17.2585	50.7668	2.94156	1.55658	9.03202e-08	3.52087e-06	Upregulated
pldA	detergent-resistant phospholipase A	66.2781	117.139	32.3711	0.276348	-1.85544	0.000924365	0.0110067	Downregulated
plsB	glycerol-3-phosphate acyltransferase	200.978	345.654	104.528	0.302405	-1.72544	2.83387e-06	8.13991e-05	Downregulated
pocR	pdu/cob regulatory protein PocR	101.934	195.387	39.6316	0.202836	-2.30161	0.00376978	0.0349692	Downregulated
ppiA	peptidyl-prolyl cis-trans isomerase	64.6601	109.167	34.9891	0.320511	-1.64156	0.000641387	0.00825234	Downregulated
ppk	Polyphosphate kinase	171.88	314.072	77.0856	0.24544	-2.02656	0.00298917	0.0290016	Downregulated
pqaB	melittin resistance protein PqaB	56.8965	23.0274	79.4759	3.45137	1.78717	5.04909e-14	6.74827e-12	Upregulated
prgI	type III secretion system apparatus	77.8257	183.291	7.51523	0.0410016	-4.60818	9.76471e-05	0.00168731	Downregulated
proX	glycine betaine-binding periplasmic protein precursor	23.8713	11.3204	32.2386	2.84784	1.50987	0.000229969	0.00349435	Upregulated
psiB	plasmid SOS inhibition protein	16.4196	5.0374	24.0078	4.7659	2.25275	0.00160465	0.0174277	Upregulated
pSLP2_intergenic_65663_65956	pSLP2_intergenic_65663_65956	30.9381	71.2714	4.04917	0.0568133	-4.13763	0.00577644	0.0501723	Downregulated
pSLT1344_intergenic_54221_54378	pSLT1344_intergenic_54221_54378	5.01105	0.809722	7.81193	9.64767	3.27018	0.0003259	0.00473242	Upregulated
pSLT1344_intergenic_59736_59823	pSLT1344_intergenic_59736_59823	28.1323	8.32358	41.3381	4.96638	2.3122	0.00860737	0.0702685	Upregulated
pSLT1344_intergenic_73797_74371	pSLT1344_intergenic_73797_74371	38.0811	79.3591	10.5624	0.133096	-2.90946	0.00105884	0.0124049	Downregulated
pSLT1344_intergenic_85345_85675	pSLT1344_intergenic_85345_85675	118.633	261.231	23.5683	0.0902202	-3.47041	2.87831e-15	4.71252e-13	Downregulated
pSLT1344_intergenic_90163_91002	pSLT1344_intergenic_90163_91002	20.4959	7.63584	29.0692	3.80694	1.92863	9.30554e-05	0.00161222	Upregulated
pspA	bacteriophage shock protein A	82.4993	156.404	33.2295	0.212459	-2.23474	0.00142212	0.0157056	Downregulated
pspE	bacteriophage shock protein E precursor	37.2022	69.5698	15.6239	0.224578	-2.15471	0.000418733	0.00574902	Downregulated
purU	formyltetrahydrofolate deformylase	157.552	349.417	29.642	0.0848327	-3.55924	4.86952e-06	0.000127562	Downregulated
pykF	pyruvate kinase	72.1804	145.989	22.9749	0.157374	-2.66773	0.00262378	0.026395	Downregulated
pyrC	Dihydroorotase	98.2895	169.638	50.724	0.299014	-1.74172	0.0126333	0.0942317	Downregulated
pyrD	dihydroorotate dehydrogenase	118.612	241.256	36.8494	0.15274	-2.71085	2.75671e-10	1.86121e-08	Downregulated
pyrG	CTP synthase	454.525	782.21	236.068	0.301797	-1.72835	1.25761e-12	1.24789e-10	Downregulated
ramA	transcriptional activator RamA	78.0259	173.823	14.161	0.0814675	-3.61763	0.000392031	0.00550947	Downregulated
recC	exonuclease V subunit	111.499	50.1947	152.369	3.03556	1.60196	4.9165e-08	2.01238e-06	Upregulated
recN	DNA repair protein	96.1558	185.99	36.2663	0.194991	-2.35852	1.18627e-05	0.00027452	Downregulated
repA2	DNA replication	422.548	823.57	155.199	0.188447	-2.40777	8.46101e-29	5.54112e-26	Downregulated
repA3	Not found	39.2045	67.6591	20.2347	0.299068	-1.74145	8.85372e-06	0.000211617	Downregulated
rhaR	L-rhamnose operon transcriptional activator	34.9679	62.6964	16.4822	0.26289	-1.92747	0.000509416	0.00676706	Downregulated
rhuM	putative DNA-binding protein	71.3353	124.304	36.0228	0.289796	-1.78689	0.000550881	0.00727363	Downregulated
rluB	putative ribosomal large subunit pseudouridine synthase B	72.9531	132.936	32.9645	0.247973	-2.01175	2.66589e-05	0.000543891	Downregulated
rnpA	RNase P, protein component	161.521	319.663	56.0933	0.175476	-2.51065	5.52329e-05	0.00103645	Downregulated
rnt	ribonuclease T	86.2706	149.129	44.3647	0.297491	-1.74908	2.7008e-12	2.4912e-10	Downregulated
rob	right origin-binding protein	194.971	379.271	72.1035	0.19011	-2.39509	0.000140453	0.00230352	Downregulated
rplC	50S ribosomal subunit protein L3	534.984	135.122	801.558	5.93209	2.56854	0.00542765	0.0476484	Upregulated
rpmH	50s ribosomal protein l34	141.021	272.802	53.1675	0.194894	-2.35924	0.000316882	0.00462196	Downregulated
rpsL	30S ribosomal subunit protein S12	393.181	700.922	188.021	0.268248	-1.89836	3.85082e-14	5.25396e-12	Downregulated
rsD	putative regulatory protein	25.2151	51.1212	7.94442	0.155404	-2.68591	0.00454321	0.0409264	Downregulated
ruvC	Crossover junction endodeoxyribonuclease ruvC	18.2751	4.88986	27.1986	5.56224	2.47567	1.19306e-07	4.54265e-06	Upregulated
samB	putative transposase	435.803	765.255	216.168	0.282478	-1.82379	0.00293908	0.0286856	Downregulated
sanA	vancomycin resistance protein	46.3592	82.4936	22.2696	0.269955	-1.88921	0.000222018	0.00338927	Downregulated
sapC	peptide transport system permease protein SapC	23.9198	9.4781	33.5476	3.53948	1.82354	2.62457e-05	0.000537135	Upregulated
sbcD	exonuclease SbcD	42.0493	73.0386	21.3898	0.292856	-1.77174	2.91494e-08	1.23961e-06	Downregulated
sciK	conserved hypothetical protein (SPI-6 associated)	9.74352	1.35261	15.3375	11.3391	3.50324	4.18145e-05	0.000812928	Upregulated
sdaC	putative L-serine dehydratase	39.1247	17.3216	53.6601	3.09788	1.63128	8.5793e-06	0.000205809	Upregulated
sdhC	succinate dehydrogenase cytochrome b-556 subunit	250.027	529.67	63.5982	0.120071	-3.05804	0.00269598	0.0267921	Downregulated
sdiA	cell-division regulatory protein	56.6215	104.683	24.5806	0.23481	-2.09043	7.36539e-05	0.00132881	Downregulated
secF	protein-export membrane protein SecF	74.7693	29.075	105.232	3.61933	1.85572	4.01037e-13	4.52826e-11	Upregulated
sfsA	Sugar fermentation stimulation protein homolog.	68.1421	134.359	23.9975	0.178607	-2.48514	2.6374e-06	7.71085e-05	Downregulated
sgaU	L-ribulose 5-phosphate epimerase	19.4091	3.63125	29.9276	8.24167	3.04294	7.68659e-07	2.50445e-05	Upregulated
siiA	type I secretion-related protein	40.9604	100.883	1.01229	0.0100344	-6.63891	0.0108409	0.0837229	Downregulated
sinR	LysR-family transcriptional regulator (SPI-6 associated)	100.734	185.917	43.9458	0.236373	-2.08086	0.000917959	0.0109503	Downregulated
sipA	pathogenicity island 1 effector protein	503.979	1172.51	58.2924	0.0497159	-4.33015	0.000167767	0.00266676	Downregulated
sipD	pathogenicity island 1 effector protein	180.348	412.942	25.285	0.0612314	-4.02958	0.000264328	0.00394324	Downregulated
SL0018	putative chitinase	41.9138	74.6156	20.1125	0.269548	-1.89138	0.000554545	0.00729117	Downregulated
SL0039	possible sulfatase	66.6812	116.366	33.5579	0.288382	-1.79395	8.78798e-14	1.07351e-11	Downregulated
SL0042	putative glycosyl hydrolase	36.1326	15.9306	49.6006	3.11354	1.63856	0.000339815	0.00490187	Upregulated
SL0083A	putative membrane protein (pseudogene)	37.8838	11.0467	55.7751	5.04903	2.33601	0.0107216	0.0830956	Upregulated
SL0084	putative sulfatase	209.041	457.081	43.6808	0.0955647	-3.38738	0.000354505	0.00506371	Downregulated
SL0160	HNH endonuclease	382.416	848.544	71.664	0.0844553	-3.56567	4.91464e-05	0.000938367	Downregulated
SL0234	putative secreted chitinase	43.2103	19.5306	58.9968	3.02074	1.5949	2.2941e-05	0.000476953	Upregulated
SL0286A	conserved hypothetical protein (SPI-6 associated)	57.9523	102.564	28.2109	0.275055	-1.86221	0.000170491	0.00270349	Downregulated
SL0339	possible transmembrane regulator	84.571	178.682	21.8301	0.122173	-3.03301	1.76144e-05	0.00038972	Downregulated
SL0347	putative cation efflux pump	6.9174	1.44989	10.5624	7.28497	2.86492	0.00541624	0.047612	Upregulated
SL0409	conserved hypothetical protein	52.2437	96.3777	22.821	0.236787	-2.07834	2.20165e-08	9.87575e-07	Downregulated
SL0415	putative oxidoreductase	98.9087	186.799	40.3155	0.215823	-2.21208	0.000435682	0.00594433	Downregulated
SL0472	conserved hypothetical protein	88.8619	148.382	49.1817	0.331453	-1.59312	1.58049e-05	0.000352063	Downregulated
SL0490	probable secreted protein	42.0054	96.3324	5.78735	0.0600769	-4.05705	0.000353494	0.00506371	Downregulated
SL0494	putative membrane protein	71.6005	137.806	27.4635	0.199291	-2.32705	4.05244e-15	6.47304e-13	Downregulated
SL0555	conserved hypothetical protein	88.6897	179.87	27.903	0.155129	-2.68846	0.000128367	0.00212292	Downregulated
SL0640	putative sigma-54 dependent transcriptional regulator	136.199	316.02	16.318	0.0516361	-4.27548	7.18719e-21	2.94181e-18	Downregulated
SL0642	conserved hypothetical protein	88.1338	175.904	29.6206	0.168391	-2.57011	0.00346821	0.0325873	Downregulated
SL0736	putative exported protein	95.5958	201.721	24.8455	0.123168	-3.0213	0.000333759	0.00483581	Downregulated
SL0746	conserved hypothetical protein	17.6165	3.4742	27.0446	7.78443	2.96059	4.42864e-07	1.51058e-05	Upregulated
SL0757	putative membrane protein	46.8241	84.9755	21.3898	0.251717	-1.99013	2.57323e-08	1.12347e-06	Downregulated
SL0818	conserved hypothetical protein	78.2911	170.145	17.055	0.100238	-3.3185	0.0101062	0.0794544	Downregulated
SL0836	putative inner membrane protein	112.292	234.104	31.0835	0.132776	-2.91293	0.0010072	0.011885	Downregulated
SL0847	putative membrane protein	88.3261	166.813	36.0014	0.215818	-2.21211	0.0118152	0.0895578	Downregulated
SL0858	putative membrane protein	27.2936	51.1182	11.4105	0.223218	-2.16348	0.0134027	0.0988449	Downregulated
SL0868	probable lipoprotein	314.184	727.117	38.8954	0.0534927	-4.22451	1.22054e-45	7.99331e-42	Downregulated
SL0876	prismane protein homolog (hybrid-cluster protein)	111.117	26.9394	167.235	6.20783	2.63409	0.000101248	0.00173579	Upregulated
SL0908	putative conserved hypothetical protein	45.2897	84.8203	18.936	0.223249	-2.16328	0.0112632	0.0862725	Downregulated
SL0938	putative transcriptional regulator	30.602	53.3001	15.4699	0.290242	-1.78467	0.000373348	0.00529233	Downregulated
SL0958	Gifsy-2 bacteriophage protein	17.6971	32.3261	7.94442	0.245758	-2.02469	0.000779479	0.00959551	Downregulated
SL0988	putative Tail Fiber Protein	48.4686	22.6755	65.664	2.89581	1.53397	8.02627e-06	0.000194682	Upregulated
SL0992	transposase (remnant)	14.6139	2.94707	22.3918	7.59799	2.92562	1.37342e-09	8.25184e-08	Upregulated
SL1019	conserved hypothetical protein	69.5182	136.512	24.8558	0.182078	-2.45737	1.09018e-05	0.0002559	Downregulated
SL1020	conserved hypothetical protein	62.1347	108.299	31.3588	0.289559	-1.78807	8.03394e-05	0.00142128	Downregulated
SL1031	conserved hypothetical protein	399.229	954.499	29.0486	0.0304334	-5.0382	0.00776076	0.0642544	Downregulated
SL1065	putative transcriptional regulator	284.967	547.668	109.834	0.200548	-2.31798	0.00133435	0.0149379	Downregulated
SL1066	putative sodium/glucose cotransporter	56.6444	104.971	24.4267	0.232699	-2.10346	0.0097371	0.0772807	Downregulated
SL1073	conserved hypothetical protein	67.7022	130.238	26.0118	0.199725	-2.32391	1.05528e-12	1.07985e-10	Downregulated
SL1075	putative membrane protein	54.4033	14.5845	80.9491	5.55035	2.47258	1.08694e-20	3.95466e-18	Upregulated
SL1098	conserved hypothetical protein	179.843	377.614	47.9949	0.1271	-2.97596	1.64029e-09	9.67774e-08	Downregulated
SL1149	putative secreted protein	77.9918	175.471	13.0059	0.07412	-3.75399	1.84911e-05	0.00040501	Downregulated
SL1150	putative TetR-family regulatory protein	508.978	1201.08	47.5761	0.0396111	-4.65795	1.12631e-35	1.47524e-32	Downregulated
SL1177	predicted bacteriophage protein	89.6175	185.687	25.5714	0.137713	-2.86026	7.32882e-09	3.72066e-07	Downregulated
SL1187	putative heat shock protein	372.566	788.17	95.4972	0.121163	-3.04498	0.00791189	0.0654156	Downregulated
SL1195	putative ABC transport ATP-binding subunit	26.2642	7.96246	38.4654	4.83085	2.27228	4.36911e-05	0.000846547	Upregulated
SL1202	hypothetical protein	223.469	531.158	18.3426	0.0345333	-4.85587	1.11032e-38	3.63575e-35	Downregulated
SL1207	conserved hypothetical protein	9.30758	3.11634	13.4351	4.31117	2.10808	0.0107813	0.0834594	Upregulated
SL1213	predicted bacteriophage protein	69.9025	140.032	23.1494	0.165315	-2.59671	3.52849e-06	9.75024e-05	Downregulated
SL1218	conserved hypothetical membrane protein	170.987	350.935	51.0215	0.145387	-2.78203	2.20512e-10	1.52014e-08	Downregulated
SL1227	conserved hypothetical protein	28.5204	53.7401	11.7072	0.217848	-2.19861	0.0100063	0.0790488	Downregulated
SL1231	putative nitroreductase	46.4674	93.6227	15.0305	0.160543	-2.63897	0.000110589	0.00187628	Downregulated
SL1235	putative exported protein	82.5073	178.508	18.5068	0.103675	-3.26986	8.20415e-12	7.16386e-10	Downregulated
SL1236	putative MutT-family protein	42.9523	83.7307	15.7666	0.188302	-2.40888	0.000490242	0.00653889	Downregulated
SL1244	conserved hypothetical protein	67.0875	131.707	24.0078	0.182282	-2.45576	0.000203494	0.00316576	Downregulated
SL1259	conserved hypothetical protein	98.4776	180.736	43.6388	0.241451	-2.0502	0.00443519	0.0400084	Downregulated
SL1280	conserved hypothetical protein	27.7425	61.1202	5.49065	0.0898335	-3.4766	4.18318e-05	0.000812928	Downregulated
SL1304	conserved hypothetical protein	29.3902	13.1689	40.2044	3.05299	1.61022	1.95227e-07	7.05772e-06	Upregulated
SL1309	putative exported protein	16.5829	28.6506	8.53782	0.297998	-1.74662	0.00721284	0.0602511	Downregulated
SL1315	hypothetical protein	29.5701	53.129	13.8643	0.260955	-1.93813	9.58828e-06	0.000228341	Downregulated
SL1322	conserved hypothetical protein	194.999	331.168	104.22	0.314704	-1.66793	0.00078615	0.0096006	Downregulated
SL1344_1330A	conserved hypothetical protein	73.0845	151.914	20.5314	0.135151	-2.88735	5.06651e-12	4.54528e-10	Downregulated
SL1412	putative conserved membrane protein	40.589	98.4356	2.02458	0.0205676	-5.60348	3.99416e-08	1.64514e-06	Downregulated
SL1430	putative exported protein	38.8449	89.52	5.06146	0.05654	-4.14459	4.43607e-13	4.84198e-11	Downregulated
SL1431	conserved hypothetical protein	51.1845	85.2475	28.4758	0.334037	-1.58192	9.41414e-07	2.99287e-05	Downregulated
SL1433	putative secreted protein	76.4691	151.297	26.5837	0.175706	-2.50877	1.79421e-07	6.56439e-06	Downregulated
SL1439	conserved hypothetical protein	70.582	144.14	21.5437	0.149464	-2.74213	0.000217604	0.00333745	Downregulated
SL1440	putative regulatory protein	96.4273	198.8	28.1791	0.141746	-2.81862	3.92176e-05	0.000766674	Downregulated
SL1457	putative membrane protein	44.7972	82.9132	19.3866	0.233818	-2.09654	1.72126e-09	1.00648e-07	Downregulated
SL1480	plasmid stability protein	50.8638	113.279	9.25341	0.0816867	-3.61376	2.56407e-12	2.39887e-10	Downregulated
SL1482	conserved hypothetical protein	44.5466	75.3549	24.0078	0.318596	-1.6502	0.00317371	0.0305207	Downregulated
SL1506	putative regulatory protein	30.1119	63.9915	7.52553	0.117602	-3.08801	3.06393e-10	2.04752e-08	Downregulated
SL1522	putative membrane protein	23.0195	46.9196	7.08604	0.151025	-2.72714	0.00643443	0.0546551	Downregulated
SL1523	conserved hypothetical protein	39.9066	89.3684	6.93213	0.077568	-3.68839	2.63688e-16	5.91137e-14	Downregulated
SL1527	putative inner membrane protein	28.5714	54.3128	11.4105	0.210088	-2.25093	0.0124361	0.0931857	Downregulated
SL1535	putative DNA-binding protein	16.9706	32.0283	6.93213	0.216437	-2.20798	0.000226898	0.0034557	Downregulated
SL1542	conserved hypothetical protein	28.2017	54.0324	10.9813	0.203235	-2.29878	4.92493e-06	0.00012799	Downregulated
SL1543	putative phosphotransferase enzyme	7.46421	14.9799	2.45377	0.163805	-2.60995	0.00499134	0.0442784	Downregulated
SL1559	conserved hypothetical protein	122.854	260.296	31.2263	0.119964	-3.05932	0.00662692	0.0558554	Downregulated
SL1583	putative multidrug transporter	180.585	410.267	27.4635	0.0669406	-3.90097	1.44518e-11	1.1542e-09	Downregulated
SL1584	putative integrase/transposase (remnant)	72.5637	139.125	28.1894	0.202619	-2.30316	0.00244845	0.0248989	Downregulated
SL1585	conserved hypothetical protein	90.467	157.013	46.1028	0.293624	-1.76796	0.00100589	0.011885	Downregulated
SL1588	putative chemo-receptor protein	39.4271	84.2426	9.55011	0.113364	-3.14096	0.00200259	0.0209504	Downregulated
SL1594	putative membrane protein	67.2561	125.658	28.3219	0.22539	-2.14951	4.57896e-09	2.39901e-07	Downregulated
SL1627	conserved hypothetical protein	48.9665	105.944	10.9813	0.103652	-3.27019	0.000575572	0.00750881	Downregulated
SL1636	putative regulatory protein	90.2206	186.749	25.8681	0.138518	-2.85185	1.88776e-07	6.8683e-06	Downregulated
SL1649	hypothetical oxidoreductase	34.0981	68.7733	10.9813	0.159674	-2.6468	0.00557387	0.048736	Downregulated
SL1652	conserved hypothetical protein	51.6896	91.312	25.2747	0.276795	-1.85311	9.92697e-09	4.8609e-07	Downregulated
SL1661	conserved hypothetical protein	18.0523	42.0938	2.02458	0.0480969	-4.37791	0.00645932	0.0547954	Downregulated
SL1664	conserved hypothetical protein	45.2696	83.4978	19.7841	0.236941	-2.0774	0.000354901	0.00506371	Downregulated
SL1686	Hypothetical UPF0225 protein.	72.5104	132.719	32.3711	0.243906	-2.0356	0.000141936	0.00231228	Downregulated
SL1696	putative invasin	48.183	88.1741	21.5223	0.244088	-2.03453	5.09917e-05	0.000965157	Downregulated
SL1709	putative sulphate transporter	207.471	443.218	50.3059	0.113502	-3.13922	1.42808e-05	0.000321392	Downregulated
SL1713	conserved hypothetical protein	88.035	166.284	35.8689	0.215708	-2.21285	5.14183e-06	0.000132574	Downregulated
SL1715	hydrogenase-1 large chain (nifE hydrogenase)	20.0116	6.85466	28.7828	4.19901	2.07005	0.013303	0.0982426	Upregulated
SL1726	conserved hypothetical protein	54.1621	112.399	15.3375	0.136455	-2.8735	6.85772e-07	2.26824e-05	Downregulated
SL1740	putative hydrolase	30.5619	62.7389	9.11063	0.145215	-2.78374	5.03045e-07	1.69817e-05	Downregulated
SL1786	hypothetical protein	81.5507	148.158	37.1461	0.25072	-1.99585	0.00298353	0.0289898	Downregulated
SL1864	conserved hypothetical protein	34.0098	71.1445	9.25341	0.130065	-2.94269	0.00490329	0.0436893	Downregulated
SL1886	transposase	21.051	8.37982	29.4984	3.52017	1.81565	0.000825606	0.0100095	Upregulated
SL1916	conserved hypothetical protein	42.0122	11.8442	62.1242	5.2451	2.39097	0.00134524	0.0150085	Upregulated
SL1932	putative bacteriophage protein	11.4648	2.84979	17.2081	6.03838	2.59416	0.013129	0.0975958	Upregulated
SL1935	putative bacteriophage baseplate protein	13.8123	2.84354	21.1248	7.42905	2.89318	1.98058e-05	0.000423883	Upregulated
SL1937	predicted bacteriophage protein	30.2658	14.0702	41.0628	2.91843	1.54519	1.53488e-05	0.000343069	Upregulated
SL1947	capsid related protein	13.3625	3.49919	19.938	5.69789	2.51043	0.00560627	0.048954	Upregulated
SL1948	putative peptidase	2.82871	0.998023	4.04917	4.05719	2.02048	0.00626049	0.0534978	Upregulated
SL1949	putative portal protein	10.5506	2.94082	15.6239	5.31276	2.40946	2.56211e-05	0.000527651	Upregulated
SL1964	putative replication protein	8.51136	2.39792	12.587	5.24912	2.39208	0.00123617	0.014104	Upregulated
SL1967	predicted bacteriophage protein	97.4922	192.137	34.3957	0.179016	-2.48184	0.00165962	0.0179465	Downregulated
SL1972	putative bacteriophage protein	10.9739	3.35519	16.0531	4.78454	2.25838	0.000386598	0.00544479	Upregulated
SL1977	conserved hypothetical protein	234.412	499.712	57.5451	0.115156	-3.11833	1.48219e-07	5.51525e-06	Downregulated
SL1987	conserved hypothetical protein	50.0578	108.871	10.8488	0.0996479	-3.32702	0.000185812	0.0029112	Downregulated
SL1988	conserved hypothetical protein	101.958	228.423	17.6484	0.0772623	-3.69409	0.00385564	0.0355142	Downregulated
SL2154	FAA-hydrolase-family protein	14.0199	4.25268	20.5314	4.82788	2.27139	2.04562e-05	0.000433553	Upregulated
SL2163	putative oxidoreductase	60.1928	121.402	19.3866	0.15969	-2.64666	1.54167e-07	5.70419e-06	Downregulated
SL2208	putative lipopolysaccharide modification acyltransferase	65.243	126.237	24.5806	0.194718	-2.36054	0.00103043	0.0121372	Downregulated
SL2211	predicted bacteriophage protein	67.1062	6.71252	107.369	15.9953	3.99957	0.00140194	0.015509	Upregulated
SL2212	bacteriophage prohead protease, HK97 family	26.1187	1.58792	42.4726	26.7473	4.74132	0.00252057	0.0255135	Upregulated
SL2257	conserved hypothetical protein	17.0434	3.36116	26.1648	7.78447	2.9606	0.00688396	0.0577248	Upregulated
SL2258	putative 2,4-dihydroxyhept-2-ene-1,7-dioic acid aldolase	25.0318	6.84487	37.1564	5.42836	2.44052	0.000621937	0.00803366	Upregulated
SL2264	conserved hypothetical protein	33.2165	69.3753	9.11063	0.131324	-2.9288	0.00039587	0.00552783	Downregulated
SL2269	conserved hypothetical protein	72.734	14.8761	111.306	7.48222	2.90347	1.31068e-14	1.95083e-12	Upregulated
SL2283	putative receptor/regulator protein	194.452	422.588	42.3615	0.100243	-3.31843	6.71833e-13	6.98387e-11	Downregulated
SL2310	putative transketolase N-terminal section	46.0739	9.98676	70.132	7.0225	2.81198	2.45589e-19	7.31074e-17	Upregulated
SL2328	putative amino acid transporter	21.8653	48.5896	4.04917	0.083334	-3.58495	1.31423e-07	4.97113e-06	Downregulated
SL2330	putative transcriptional regulator	49.5849	90.1283	22.556	0.250265	-1.99847	0.00460602	0.0413784	Downregulated
SL2391	cell division protein	216.733	377.052	109.854	0.29135	-1.77917	2.2886e-12	2.17218e-10	Downregulated
SL2457	putative exported protein	125.97	272.211	28.4758	0.104609	-3.25692	2.14361e-09	1.23145e-07	Downregulated
SL2507	putative RNA methyltransferase	322.63	668.02	92.3699	0.138274	-2.8544	2.91734e-13	3.35187e-11	Downregulated
SL2537	putative transcriptional regulator	59.9839	134.116	10.5624	0.0787557	-3.66647	1.78961e-06	5.3762e-05	Downregulated
SL2555	predicted bacteriophage protein	9.75019	1.17056	15.4699	13.2158	3.72419	0.00659197	0.0556325	Upregulated
SL2560	predicted bacteriophage protein	5.9059	1.52842	8.82422	5.77343	2.52943	0.00066747	0.0085044	Upregulated
SL2561	predicted bacteriophage protein	22.8523	5.93461	34.1307	5.75113	2.52385	0.00132405	0.0148768	Upregulated
SL2577	putative bacteriophage encoded virulence protein	138.001	307.241	25.174	0.0819357	-3.60936	0.0126048	0.0941265	Downregulated
SL2582	predicted bacteriophage protein	22.9176	42.7702	9.6826	0.226387	-2.14314	0.00238203	0.0243911	Downregulated
SL2584	putative damage-inducible protein	28.1397	67.3123	2.02458	0.0300775	-5.05517	0.00729456	0.0606244	Downregulated
SL2594	predicted bacteriophage protein	1692.03	4018.9	140.785	0.0350308	-4.83523	3.38807e-05	0.000672377	Downregulated
SL2597A	predicted bacteriophage protein	15.9761	5.21619	23.1494	4.43799	2.14991	0.000132541	0.00218642	Upregulated
SL2614	conserved hypothetical protein	34.1031	79.184	4.04917	0.0511362	-4.28951	0.000878837	0.0105606	Downregulated
SL2644	predicted bacteriophage protein	369.363	820.452	68.6374	0.083658	-3.57935	9.55511e-08	3.70275e-06	Downregulated
SL2659	conserved hypothetical protein	145.542	327.216	24.4267	0.0746499	-3.74371	1.65354e-08	7.68015e-07	Downregulated
SL2695	putative competence protein	73.6391	123.871	40.1513	0.324138	-1.62532	0.00114827	0.0133333	Downregulated
SL2715	hypothetical protein	129.711	319.723	3.03688	0.00949846	-6.71809	1.44561e-08	6.80467e-07	Downregulated
SL2726	conserved hypothetical protein	48.9954	92.5505	19.9586	0.215651	-2.21323	4.67211e-15	7.28515e-13	Downregulated
SL2730	putative ATPase	182.223	349.333	70.8159	0.202717	-2.30246	4.8338e-06	0.000127135	Downregulated
SL2732	putative transcriptional regulator	34.1865	64.439	14.0182	0.217542	-2.20064	3.29295e-06	9.21604e-05	Downregulated
SL2736	glucitol/sorbitol-specific phosphotransferase enzyme IIB component	14.1352	1.28985	22.6988	17.598	4.13734	1.14218e-05	0.000267148	Upregulated
SL2738	putative hexulose 6 phosphate synthase	113.961	252.818	21.3898	0.0846056	-3.5631	3.3941e-12	3.08721e-10	Downregulated
SL2784	putative membrane protein	270.043	649.74	16.9114	0.026028	-5.26379	9.50281e-11	6.83889e-09	Downregulated
SL2880	salmonella pathogenicity island 1 protein	110.116	251.225	16.0428	0.0638581	-3.96899	0.00636506	0.0542065	Downregulated
SL2884	salmonella pathogenicity island 1 protein	58.2424	102.892	28.4758	0.276754	-1.85332	0.0131659	0.0976486	Downregulated
SL2889	conserved hypotheticalprotein	9.33748	1.65722	14.4577	8.72406	3.125	0.00287599	0.02823	Upregulated
SL2917	conserved hypothetical protein	15.4757	2.0493	24.4267	11.9195	3.57525	4.50137e-06	0.000120723	Upregulated
SL2920	hypothetical protein	22.4394	7.54183	32.3711	4.2922	2.10172	1.40683e-06	4.36652e-05	Upregulated
SL2998	possible regulatory protein	25.5016	52.4812	7.51523	0.143199	-2.80391	2.90911e-05	0.000586207	Downregulated
SL3035	conserved hypothetical protein	52.0422	93.2347	24.5806	0.263642	-1.92335	1.70492e-08	7.8287e-07	Downregulated
SL3037	conserved hypothetical protein	62.2644	111.198	29.642	0.26657	-1.90741	0.00284265	0.0279528	Downregulated
SL3043	putative membrane protein	47.4127	82.5509	23.9872	0.290574	-1.78302	8.89659e-05	0.00154546	Downregulated
SL3069	conserved hypothetical protein	40.898	70.1603	21.3898	0.30487	-1.71373	3.60521e-07	1.24923e-05	Downregulated
SL3086	conserved hypothetical protein	33.134	71.117	7.81193	0.109846	-3.18644	4.51626e-06	0.000120723	Downregulated
SL3096	arylsulfatase	66.0689	120.94	29.4881	0.243824	-2.03609	5.23845e-06	0.000134536	Downregulated
SL3112	hypothetical protein	144.34	284.931	50.6129	0.177632	-2.49303	0.00727017	0.0604986	Downregulated
SL3127	putative membrane protein	22.6519	43.1946	8.95671	0.207357	-2.26981	3.27345e-05	0.000651606	Downregulated
SL3129	hypothetical protein	72.7244	167.486	9.55011	0.0570204	-4.13238	0.00134844	0.0150186	Downregulated
SL3137	probable AraC-family trancriptional regulatory protein	67.1625	147.507	13.5993	0.0921939	-3.43919	1.70943e-08	7.8287e-07	Downregulated
SL3138	probable alcohol dehydrogenase	18.5303	31.3721	9.969	0.317766	-1.65396	0.00926971	0.0744875	Downregulated
SL3141	conserved hypothetical protein	71.6306	138.74	26.8907	0.19382	-2.36721	0.00969038	0.0771319	Downregulated
SL3149	possible AraC-family transcriptional regulator	30.5967	12.72	42.5146	3.34235	1.74086	0.0126756	0.0943324	Upregulated
SL3150	possible exported protein	28.5492	53.3827	11.9936	0.224672	-2.15411	2.1792e-05	0.000455962	Downregulated
SL3169	conserved hypothetical protein	169.952	293.489	87.594	0.298458	-1.7444	0.0086122	0.0702685	Downregulated
SL3198	probable membrane transport protein	131.289	226.752	67.6465	0.298328	-1.74503	2.95692e-06	8.34957e-05	Downregulated
SL3205	conserved hypothetical protein	60.3256	105.294	30.3465	0.288206	-1.79483	0.000182395	0.00287148	Downregulated
SL3220	conserved hypothetical protein	46.7275	21.4549	63.5759	2.96323	1.56717	2.87357e-06	8.2179e-05	Upregulated
SL3224	probable carbohydrate kinase	60.1462	147.329	2.02458	0.013742	-6.18527	0.000215807	0.00332546	Downregulated
SL3242	conserved hypothetical protein	22.4043	38.2512	11.8397	0.309524	-1.69188	0.00609653	0.0526731	Downregulated
SL3284	putative membrane protein	24.0741	10.9848	32.8003	2.98597	1.5782	0.00050029	0.00665935	Upregulated
SL3297	conserved hypothetical protein	84.0997	190.74	13.0059	0.0681863	-3.87437	4.63861e-06	0.00012337	Downregulated
SL3312	putative GntR-family transcriptional regulator	93.3063	174.311	39.3032	0.225477	-2.14895	0.0024054	0.0245756	Downregulated
SL3333	conserved hypothetical protein	46.9985	106.208	7.52553	0.0708566	-3.81895	1.41122e-11	1.14099e-09	Downregulated
SL3360	putative exported protein	26.5635	59.6912	4.47836	0.0750254	-3.73648	0.0115064	0.0877244	Downregulated
SL3372	conserved hypothetical protein	93.1635	166.545	44.2425	0.265649	-1.91241	9.92416e-08	3.82314e-06	Downregulated
SL3429	conserved hypothetical protein	152.327	268.29	75.0182	0.279616	-1.83848	2.27329e-08	1.01278e-06	Downregulated
SL3477	putative competence protein	25.4249	50.7556	8.53782	0.168214	-2.57163	0.00164619	0.0178492	Downregulated
SL3483	conserved hypothetical protein	55.9701	111.736	18.7932	0.168194	-2.5718	0.00357989	0.0334925	Downregulated
SL3484	conserved hypothetical protein (homologue of DnaJ: DNA damage inducible protein)	53.4391	105.853	18.4965	0.174738	-2.51674	0.000237716	0.00360371	Downregulated
SL3500	putative IclR-family transcriptional regulator	88.5891	155.984	43.6594	0.279897	-1.83703	0.00346196	0.0325753	Downregulated
SL3518	hypothetical protein	264.374	593.927	44.6725	0.0752155	-3.73283	0.00338625	0.03214	Downregulated
SL3561	conserved hypothetical protein	62.1235	108.668	31.0938	0.286136	-1.80523	9.94596e-09	4.8609e-07	Downregulated
SL3586	conserved hypothetical protein	41.6355	98.015	4.04917	0.0413117	-4.59731	0.000626178	0.00807252	Downregulated
SL3602	putative fimbrial protein (LpfD)	17.6076	40.9822	2.02458	0.0494016	-4.3393	0.0111638	0.085711	Downregulated
SL3607	putative lipoprotein	64.2715	116.876	29.2017	0.249852	-2.00086	4.90349e-06	0.00012794	Downregulated
SL3653	hypothetical protein	96.827	228.632	8.95671	0.0391752	-4.67392	5.20681e-12	4.60802e-10	Downregulated
SL3673A	putative inner membrane protein (fragment)	11.2772	2.14984	17.362	8.07597	3.01364	1.44274e-05	0.000323578	Upregulated
SL3715	putative glycosyl hydrolase	24.5708	11.3519	33.3834	2.94078	1.5562	8.20165e-05	0.00144002	Upregulated
SL3717	hypothetical protein	81.6546	192.22	7.94442	0.0413299	-4.59667	0.00472601	0.0423401	Downregulated
SL3743	conserved hypothetical protein	65.1188	149.362	8.95671	0.0599665	-4.0597	0.000612527	0.00792775	Downregulated
SL3750	putative phosphoenolpyruvate-dependent sugar phosphotransferase system, eiia 2	56.5981	117.018	16.318	0.139449	-2.8422	0.000690339	0.00871105	Downregulated
SL3812	hypothetical protein	355.766	842.805	31.0732	0.0368688	-4.76146	0.0075325	0.0624435	Downregulated
SL3858	possible LysR-family transcriptional regulatory protein	53.6396	107.626	17.6484	0.163979	-2.60842	0.000890361	0.0106599	Downregulated
SL3866	conserved hypothetical protein	29.1092	69.736	2.02458	0.0290321	-5.10621	7.86298e-05	0.00140696	Downregulated
SL3882	glucose-1-phosphate thymidylyltransferase	16.9882	3.22313	26.1648	8.11784	3.0211	1.34858e-06	4.20566e-05	Upregulated
SL3959	hypothetical protein	63.0868	140.355	11.5747	0.0824673	-3.60003	0.00238361	0.0243911	Downregulated
SL3980	putative DNA-binding protein	30.5873	73.4314	2.02458	0.0275711	-5.1807	1.22532e-05	0.000280581	Downregulated
SL4006	hypothetical protein	20.7172	7.56086	29.4881	3.9001	1.96351	1.27199e-05	0.000288243	Upregulated
SL4015	putative carbohydrate kinase	31.0072	7.275	46.8287	6.43694	2.68637	5.34529e-11	3.97799e-09	Upregulated
SL4017	putative GntR-family regulatory protein	53.0822	104.945	18.5068	0.176347	-2.50351	2.28614e-14	3.32709e-12	Downregulated
SL4060	phosphoenolpyruvate-protein phosphotransferase (ec 2.7.3.9) (phosphotransferase system, enzyme i) (enzyme i-ani)	91.2644	40.7723	124.926	3.06399	1.61541	1.73524e-10	1.20895e-08	Upregulated
SL4061	PTS system, protein component IIC (phosphotransferase enzyme ii, c component)	37.1753	8.53659	56.2678	6.59136	2.72058	6.74126e-15	1.02671e-12	Upregulated
SL4062	PTS system protein IIB component 1 (phosphotransferase enzyme ii, b component) (ec 2.7.1.69)	16.8756	5.56453	24.4164	4.38785	2.13352	1.10363e-07	4.22673e-06	Upregulated
SL4127	conserved hypothetical protein	89.2828	183.53	26.4512	0.144125	-2.79461	2.01763e-05	0.000430406	Downregulated
SL4139	hypothetical membrane protein	54.8686	113.736	15.6239	0.13737	-2.86386	0.000308758	0.00452361	Downregulated
SL4186	conserved hypothetical protein	102.302	190.496	43.5063	0.228384	-2.13047	0.000133717	0.00220028	Downregulated
SL4187	conserved hypothetical protein	56.0954	93.8596	30.9193	0.329421	-1.602	5.29342e-06	0.00013479	Downregulated
SL4188	hypothetical protein	10.5951	19.1263	4.90754	0.256586	-1.96249	0.00372118	0.0345674	Downregulated
SL4206	lysR family regulatory protein	28.5498	52.0964	12.852	0.246696	-2.0192	1.20528e-05	0.000277935	Downregulated
SL4250	putative GerE family regulatory protein	46.8472	109.526	5.06146	0.0462125	-4.43557	4.3516e-06	0.000117278	Downregulated
SL4251	araC family regulatory protein	654.561	1609.93	17.6484	0.0109622	-6.51131	5.31008e-06	0.00013479	Downregulated
SL4360	conserved hypothetical membrane protein	10.5107	2.21261	16.0428	7.25061	2.8581	3.78559e-09	2.03888e-07	Upregulated
SL4427	putative inner membrane protein	40.2209	68.2368	21.5437	0.31572	-1.66328	7.05676e-06	0.000173089	Downregulated
SL4429	conserved hypothetical protein	128.042	294.521	17.055	0.0579077	-4.1101	0.000140694	0.00230352	Downregulated
SL4431	hypothetical protein	68.0703	130.73	26.2973	0.201158	-2.3136	0.00612231	0.0527566	Downregulated
SL4433	putative inner membrane protein	158.404	347.867	32.0958	0.0922647	-3.43808	7.97337e-06	0.000194117	Downregulated
SL4440	conserved hypothetical protein	40.5102	87.8403	8.95671	0.101966	-3.29384	0.000453916	0.00615465	Downregulated
SL4441	probable aspartate racemase	35.4746	67.0001	14.4577	0.215786	-2.21233	0.00612215	0.0527566	Downregulated
SL4445	putative membrane protein	57.9363	117.971	17.9134	0.151846	-2.71932	0.00384991	0.0355114	Downregulated
SL4446	putative membrane protein	57.5138	101.898	27.9245	0.274043	-1.86752	3.94328e-11	2.96834e-09	Downregulated
SL4447	putative membrane protein	18.6346	39.2251	4.90754	0.125112	-2.9987	2.16959e-07	7.68034e-06	Downregulated
SL4448	putative sugar transport protein	19.3631	38.0097	6.93213	0.182378	-2.455	0.000260623	0.00389684	Downregulated
SL4452	conserved hypothetical protein	21.8897	0.753204	35.9808	47.7703	5.57804	0.00977537	0.077411	Upregulated
SL4460	hypothetical protein	29.4251	54.0384	13.0162	0.240869	-2.05368	2.98973e-07	1.04148e-05	Downregulated
SL4501	putative outer membrane protein	38.5187	73.982	14.8765	0.201083	-2.31413	0.000692629	0.00872312	Downregulated
SL4502	putative outer membrane protein	43.6213	93.456	10.3982	0.111263	-3.16795	8.45068e-05	0.00147826	Downregulated
SL4526	conserved hypothetical protein	514.441	1214.74	47.5761	0.0391657	-4.67427	2.17341e-09	1.23771e-07	Downregulated
SLP1_0045	putative inner membrane protein	13.2187	2.87805	20.1125	6.98825	2.80493	0.000126036	0.00208965	Upregulated
SLP1_0049	putative adenine-specific DNA methylase	18.7395	2.15609	29.7951	13.8191	3.78859	2.78488e-09	1.53262e-07	Upregulated
SLP1_0060	predicted protein	111.793	236.769	28.4758	0.120268	-3.05567	6.61786e-07	2.20002e-05	Downregulated
SLP1_0064	putative phosphoribulokinase / uridine kinase family	204.355	74.9492	290.625	3.87762	1.95517	0.0108194	0.0836554	Upregulated
SLP1_0075	putative diguanylate cyclase/phosphodiesterase	45.9349	13.1534	67.7893	5.15376	2.36563	6.17472e-13	6.52229e-11	Upregulated
SLP1_0091	hypothetical protein	758.019	1665.04	153.34	0.0920939	-3.44075	9.65582e-07	3.05488e-05	Downregulated
SLP3_0002	SLP3_0002	1617.28	3491.38	367.876	0.105367	-3.24651	0.00039989	0.00557209	Downregulated
smpA	small protein A	147.118	296.049	47.8307	0.161564	-2.62983	1.71743e-10	1.20895e-08	Downregulated
smpB	SsrA (tmRNA) -binding protein	169.598	396.004	18.6607	0.0471226	-4.40744	0.000647967	0.00830438	Downregulated
sopA	secreted protein SopA	208.129	416.213	69.4062	0.166756	-2.58419	0.00208009	0.0216303	Downregulated
sopE	invasion-associated secreted protein.	2097.9	5210.46	22.863	0.00438791	-7.83225	4.70748e-05	0.000904085	Downregulated
sopE2	invasion-associated secreted effector protein (sopE2)	105.294	244.354	12.587	0.0515112	-4.27897	0.00263827	0.026419	Downregulated
spaT	type III secretion-associated chaperone	292.827	714.705	11.5747	0.0161951	-5.9483	1.32078e-07	4.97113e-06	Downregulated
spvD	putative transposase	957.009	2283.95	72.3796	0.0316905	-4.97981	0.000111931	0.00188926	Downregulated
srfJ	O-glycosyl hydrolase	52.4723	10.2022	80.6524	7.90539	2.98284	0.00289655	0.028355	Upregulated
ssaS	putative type III secretion protein	21.012	6.15117	30.9193	5.02657	2.32958	0.0117428	0.089319	Upregulated
ssaT	putative type III secretion protein	64.38	15.4621	96.9919	6.27287	2.64912	0.00144175	0.0158424	Upregulated
sscA	Type III secretion system chaperone protein	435.812	43.5812	697.299	16	4	0.000163797	0.00260999	Upregulated
stbA	plasmid stability protein	182.349	299.48	104.262	0.348143	-1.52225	0.00263297	0.026419	Downregulated
stcC	putative outer membrane usher protein	61.4498	102.659	33.9768	0.330966	-1.59524	0.00947734	0.0759695	Downregulated
stpA	tyrosine phosphatase (associated with virulence)	294.151	624.996	73.5878	0.117741	-3.08631	3.91953e-06	0.000107402	Downregulated
tap	Not found	30.6955	66.9843	6.50294	0.0970816	-3.36466	0.000783553	0.0096006	Downregulated
tctE	putative two-component system sensor kinase	46.5245	20.8523	63.6394	3.05192	1.60972	1.15277e-05	0.000268665	Upregulated
thdF	thiophene and furan oxidation protein	37.9594	12.2937	55.0699	4.47953	2.16335	3.82039e-09	2.03888e-07	Upregulated
tlpA	alpha-helical coiled coil protein	72.4159	32.2699	99.1798	3.07345	1.61986	4.10908e-10	2.60011e-08	Upregulated
torT	Solute binding receptor protein	72.3829	133.688	31.5127	0.235718	-2.08487	0.00115595	0.0133752	Downregulated
tpx	Probable thiol peroxidase	238.296	471.36	82.9205	0.175918	-2.50703	0.0112534	0.0862725	Downregulated
traK	conjugative transfer assembly protein	11.7848	3.22014	17.4945	5.43284	2.44171	0.000278319	0.00413313	Upregulated
traK	SLP2_0073	30.8117	5.66507	47.5761	8.39814	3.07007	6.5434e-14	8.57055e-12	Upregulated
traL	SLP2_0069	25.237	8.26352	36.5527	4.42339	2.14515	1.31282e-08	6.27566e-07	Upregulated
traM	SLP2_0068	32.739	8.71865	48.7526	5.59176	2.4833	3.1544e-10	2.08668e-08	Upregulated
traQ	conjugative transfer pilin chaperone protein	12.7109	4.01709	18.5068	4.60702	2.20384	0.00272776	0.0270659	Upregulated
traQ	SLP2_0064	22.2996	6.31774	32.9542	5.21614	2.38298	4.35554e-09	2.30036e-07	Upregulated
trcD	conjugal transfer protein	137.692	260.95	55.5205	0.212763	-2.23268	6.46655e-05	0.00118295	Downregulated
trg	methyl-accepting chemotaxis protein III (mcp-iii) (ribose and galactose chemoreceptor protein)	51.3304	86.4716	27.903	0.322684	-1.6318	4.0568e-10	2.60011e-08	Downregulated
trmU	Probable tRNA	118.751	199.764	64.7422	0.324093	-1.62552	0.000314557	0.00459828	Downregulated
trpH	conserved hypothetical protein	47.5962	88.1934	20.5314	0.2328	-2.10284	3.54391e-05	0.000701181	Downregulated
truB	tRNA pseudouridine 55 synthase (psi55 synthase) (p35 protein)	45.442	20.9995	61.737	2.93992	1.55578	1.74212e-06	5.28201e-05	Upregulated
tus	DNA replication terminus site-binding protein	63.6519	115.128	29.3342	0.254795	-1.97259	0.00168007	0.018067	Downregulated
ubiA	4-hydroxybenzoate octaprenyl transferase	48.4251	82.658	25.6032	0.309748	-1.69083	2.89517e-08	1.23925e-06	Downregulated
ubiC	chorismate lyase	173.366	398.922	22.9955	0.0576441	-4.11668	1.90745e-05	0.000413639	Downregulated
ubiG	3-demethylubiquinone-9 3-methyltransferase	192.346	364.046	77.8797	0.213928	-2.2248	0.0102132	0.0800122	Downregulated
udhA	possible pyridine nucleotide-disulphide oxidoreductase	412.803	904.923	84.723	0.0936246	-3.41697	1.97955e-05	0.000423883	Downregulated
udk	Uridine kinase	58.478	115.843	20.2347	0.174674	-2.51727	0.000379461	0.00536736	Downregulated
uhpT	hexosephosphate transport protein	17.3677	3.97335	26.2973	6.61843	2.72649	1.08066e-05	0.000254578	Upregulated
xseB	exodeoxyribonuclease small subunit	34.4754	59.3185	17.9134	0.301987	-1.72744	0.00871503	0.0707246	Downregulated
yacA	conserved hypothetical protein	70.8192	127.371	33.1184	0.260016	-1.94333	1.75479e-09	1.017e-07	Downregulated
yadF	carbonic anhydrase	152.408	286.713	62.8715	0.219284	-2.18913	3.1782e-08	1.33965e-06	Downregulated
yaeA	putative membrane protein	51.1094	114.339	8.95671	0.078335	-3.6742	5.06589e-05	0.000961639	Downregulated
yaeB	conserved hypothetical protein	34.5708	68.4211	12.0039	0.175441	-2.51094	7.90039e-05	0.0014098	Downregulated
yaeT	outer membrane protein precursor	356.872	148.455	495.816	3.33984	1.73978	8.48717e-05	0.00147826	Upregulated
yafB	SLP2_0010	371.664	776.129	102.021	0.131448	-2.92743	4.76031e-07	1.6153e-05	Downregulated
yafD	hypothetical protein	84.284	149.744	40.6439	0.271423	-1.88139	0.00148363	0.0162209	Downregulated
yafK	putative exported protein	178.671	352.307	62.9135	0.178576	-2.48539	5.58166e-06	0.000140055	Downregulated
yajB	conserved hypothetical protein	43.8031	98.8787	7.08604	0.071664	-3.80261	1.87232e-05	0.000408728	Downregulated
ybaO	hypothetical transcriptional regulator	39.9678	75.3948	16.3498	0.216855	-2.2052	0.0026951	0.0267921	Downregulated
ybdO	putative lysR-family transcriptional regulator	207.331	472.808	30.3465	0.0641835	-3.96165	2.30081e-08	1.01811e-06	Downregulated
ybfA	putative exported protein	136.108	263.324	51.2968	0.194805	-2.3599	1.07579e-06	3.3872e-05	Downregulated
ybgR	probable cation transport protein	29.6798	52.5131	14.4577	0.275315	-1.86084	0.00923	0.0743509	Downregulated
ybhA	conserved hypothetical protein	37.167	74.9272	11.9936	0.16007	-2.64323	0.0124646	0.0932923	Downregulated
ybiH	hypothetical tetR-family transcriptional regulator	36.9566	74.401	11.9936	0.161202	-2.63306	3.82933e-09	2.03888e-07	Downregulated
ybiW	putative formate acetyltransferase 3	123.049	23.1654	189.639	8.18629	3.03321	0.00310154	0.0299146	Upregulated
ybiY	putative pyruvate formate-lyase 3 activating enzyme	95.6107	12.6822	150.896	11.8983	3.57268	3.49475e-06	9.7392e-05	Upregulated
ybjC	putative membrane protein	12.1954	25.9331	3.03688	0.117104	-3.09414	0.000784868	0.0096006	Downregulated
yccF	putative membrane protein	34.3521	81.3249	3.03688	0.0373425	-4.74304	6.96528e-06	0.000171487	Downregulated
yecH	conserved hypothetical protein	40.1372	80.6201	13.1487	0.163094	-2.61622	2.469e-06	7.25089e-05	Downregulated
yecI	ferritin-like protein	107.407	194.76	49.1714	0.252472	-1.9858	6.10007e-08	2.45088e-06	Downregulated
yeeA	putative membrane protein	42.7525	80.655	17.4842	0.216778	-2.20571	0.00821459	0.0674153	Downregulated
yehE	conserved hypothetical protein	406.716	969.751	31.3588	0.0323369	-4.95067	4.63502e-05	0.000892788	Downregulated
yehW	putative permease transmembrane component	65.4058	113.042	33.6483	0.297662	-1.74825	0.00188591	0.0200175	Downregulated
yeiR	conserved hypothetical protein	33.2994	54.6291	19.0796	0.349257	-1.51764	0.0070309	0.0588064	Downregulated
yejD	ribosomal small subunit pseudouridine synthase	53.1597	129.862	2.02458	0.0155902	-6.00321	2.96724e-07	1.03917e-05	Downregulated
yejG	conserved hypothetical protein	48.5223	106.996	9.53981	0.0891606	-3.48745	0.00166065	0.0179465	Downregulated
yejM	putative sulphatase	88.4862	155.925	43.5269	0.279152	-1.84087	0.000215738	0.00332546	Downregulated
yfeA	putative membrane protein	85.4404	153.756	39.8966	0.25948	-1.94631	0.00212581	0.0220283	Downregulated
yfeC	conserved hypothetical protein	52.8257	118.398	9.11063	0.076949	-3.69995	3.51736e-10	2.30352e-08	Downregulated
yfeD	conserved hypothetical protein	49.458	93.5072	20.0919	0.21487	-2.21846	8.479e-05	0.00147826	Downregulated
yffB	conserved hypothetical protein	56.387	116.903	16.0428	0.137231	-2.86532	0.000645292	0.00828631	Downregulated
ygaC	conserved hypothetical protein	99.5337	247.316	1.01229	0.00409311	-7.93259	2.70791e-16	5.91137e-14	Downregulated
ygdD	conserved hypothetical protein	13.6717	27.0168	4.77506	0.176744	-2.50027	0.00323107	0.0308909	Downregulated
yghB	DedA-family integral membrane protein	115.904	246.387	28.9153	0.117357	-3.09102	0.00113337	0.0131837	Downregulated
ygjM	conserved hypothetical protein	241.253	525.926	51.4713	0.0978679	-3.35302	1.65084e-19	5.14826e-17	Downregulated
ygjN	conserved hypothetical protein	258.027	632.276	8.52752	0.013487	-6.21228	6.69962e-30	4.87509e-27	Downregulated
yhcP	putative membrane protein	32.8225	54.296	18.5068	0.340851	-1.55279	4.77081e-05	0.000913569	Downregulated
yhdV	possible lipoprotein	14.8155	32.4835	3.03688	0.0934899	-3.41905	3.92094e-05	0.000766674	Downregulated
yheA	bacterioferritin-associated ferredoxin	69.9512	133.452	27.6175	0.206947	-2.27267	0.00470226	0.0421851	Downregulated
yheL	conserved hypothetical protein	54.277	101.199	22.9955	0.22723	-2.13778	0.000365714	0.00520665	Downregulated
yheR	putative oxidoreductase	38.7951	66.4214	20.3775	0.306791	-1.70467	0.00124785	0.0141993	Downregulated
yhfA	conserved hypothetical protein	92.5035	174.451	37.872	0.217093	-2.20362	7.40265e-08	2.93818e-06	Downregulated
yhgG	conserved hypothetical protein	7.95697	1.90204	11.9936	6.30565	2.65665	0.000149458	0.00242277	Upregulated
yhjA	probable cytochrome c peroxidase	194.797	418.897	45.3976	0.108374	-3.20591	0.00863738	0.0702685	Downregulated
yhjD	putative membrane protein	31.2738	60.8224	11.5747	0.190303	-2.39363	0.000738224	0.00915649	Downregulated
yhjH	conserved hypothetical protein	263.997	626.786	22.1371	0.0353185	-4.82343	5.43092e-36	8.89178e-33	Downregulated
yhjS	conserved hypothetical protein	118.439	250.348	30.5004	0.121832	-3.03703	1.45466e-08	6.80467e-07	Downregulated
yibK	putative RNA-methyltransferase	30.4822	51.2514	16.6362	0.324599	-1.62327	0.000402483	0.00559631	Downregulated
yjbO	putative membrane protein	19.2451	36.8245	7.52553	0.204362	-2.2908	5.56975e-06	0.000140055	Downregulated
yjeB	conserved hypothetical protein	46.9156	98.4086	12.587	0.127905	-2.96685	7.38578e-05	0.00132883	Downregulated
yjeK	conserved hypothetical protein	67.7868	120.68	32.525	0.269515	-1.89156	0.0061441	0.052824	Downregulated
yohN	conserved hypothetical protein	75.0226	147.482	26.7162	0.181149	-2.46475	1.3445e-09	8.1529e-08	Downregulated
yojN	putative two-component system sensor kinase	114.623	190.087	64.313	0.338334	-1.56348	0.0019045	0.0201822	Downregulated
yrfC	putative membrane protein	12.3284	1.77324	19.3652	10.9208	3.44901	2.86581e-05	0.000579265	Upregulated
yrfG	putative hydrolase	68.6251	137.1	22.9749	0.167577	-2.5771	0.000414983	0.0057095	Downregulated
ytfE	conserved hypothetical protein	40.8347	8.86833	62.1456	7.00759	2.80892	0.0122086	0.0920068	Upregulated
