# Supplementary material for: Transcriptome and proteome analysis of Salmonella enterica serovar Typhimurium systemic infection of wild type and immune-deficient mice
Source: PLoS One. 2017 Aug 10;12(8):e0181365. doi: 10.1371/journal.pone.0181365 (PMC5552096; doi:10.1371/journal.pone.0181365)
Supplement: S7 Table — The pathways that were statistically overrepresented among the DE genes are listed for each of the datasets compared. (XLS) [file pone.0181365.s007.xls]

## Sheet: Sheet1
Datasets compared	Number of DE genes (up-regulated genes, down-regulated genes, at FDR <= 0.05 and Fold Change >= 2.0)	Pathways in DE gene datasets
Group 1 vs Input - unique	Total: 178
	Up-regulated: 238	ABC transporters; Two-component system;
	Down-regulated: 155	Ribosome;
Group 2 vs Input - unique	Total: 305
	Up-regulated: 160	Ribosome; Two-component system; Oxidative phosphorylation; Bacterial secretion system
	Down-regulated: 145	None
Group 3 vs Input - unique	Total: 314
	Up-regulated: 116	Biosynthesis of siderophore group nonribosomal peptides; Nitrogen metabolism; Two-component system
	Down-regulated: 198	Two-component system
‘Group 1 vs Input’ vs ‘Group 2 vs Input’ - shared	Total: 128
	Up-regulated: 26	None
	Down-regulated: 102	Two-component system
‘Group 1 vs Input’ vs ‘Group 3 vs Input’ - shared	Total: 93
	Up-regulated: 37	None
	Down-regulated: 56	None
‘Group 2 vs Input’ vs ‘Group 3 vs Input’ - shared	Total: 148
	Up-regulated: 37	Valine, leucine and isoleucine biosynthesis
	Down-regulated: 111	Glycolysis and Gluconeogenesis
‘Group 1 vs Input’ vs ‘Group 2 vs Input’ vs ‘Group 3 vs Input’ - shared	Total: 172
	Up-regulated: 14	None
	Down-regulated: 158	None
Group 1 vs Group 2 - unique	Total: 185
	Up-regulated: 151	ABC transporters; Two-component system
	Down-regulated: 34	Ribosome
Group 1 vs Group 3 - unique	Total: 40
	Up-regulated: 18	None
	Down-regulated: 22	None
Group 2 vs Group 3 - unique	Total: 18
	Up-regulated: 8	None
	Down-regulated: 10	None
‘Group 1 vs Group 2’ vs ‘Group 1 vs Group 3’ - shared	Total: 24
	Up-regulated: 15	None
	Down-regulated: 9	None
‘Group 1 vs Group 2’ vs ‘Group 2 vs Group 3’ - shared	Total: 0
	Up-regulated: 0	None
	Down-regulated: 0	None
‘Group 1 vs Group 3’ vs ‘Group 2 vs Group 3’ - shared	Total: 0
	Up-regulated: 0	None
	Down-regulated: 0	None
‘Group 1 vs Group 2’ vs ‘Group 1 vs Group 3’ vs ‘Group 2 vs Group 3’ - shared	Total: 0
	Up-regulated: 0	None
	Down-regulated: 0	None
