# Supplementary material for: Transcriptome and proteome analysis of Salmonella enterica serovar Typhimurium systemic infection of wild type and immune-deficient mice
Source: PLoS One. 2017 Aug 10;12(8):e0181365. doi: 10.1371/journal.pone.0181365 (PMC5552096; doi:10.1371/journal.pone.0181365)
Supplement: S9 Table — Table showing the DE genes from the Group 1 S. Typhimurium vs Group 3 S. Typhimurium comparison. (XLS) [file pone.0181365.s009.xls]

## Sheet: Group 1 vs Group 3
Gene Name	Product Annotation	BaseMean	BaseMeanA	BaseMeanB	Fold Change	log2 Fold-Change	P-value	False Discovery Rate (FDR)	Effect
argD	Acetylornithine/succinyldiaminopimelateaminotransferase	4.20333	1.34638	7.06027	5.24387	2.39063	0.000226011	0.0293989	Upregulated
cdsA	phosphatidate cytidylyltransferase	3.93099	6.35979	1.5022	0.236202	-2.08191	0.000779812	0.0721883	Downregulated
citA	citrate-proton symporter	6.11966	2.87971	9.35962	3.25019	1.70052	9.67179e-05	0.0179066	Upregulated
cls	Cardiolipin synthetase	5.89728	2.58447	9.21008	3.56362	1.83334	0.000647295	0.062604	Upregulated
fabB	3-oxoacyl-[acyl-carrier-protein] synthase I	18.0565	26.7973	9.31568	0.347635	-1.52436	0.000244916	0.0311188	Downregulated
fdoI	formate dehydrogenase-O gamma subunit	8.73508	14.0619	3.40826	0.242375	-2.04469	4.26902e-08	6.91581e-05	Downregulated
FQ312003.4499	FQ312003.4499	4.64445	0.574778	8.71411	15.1608	3.92228	6.08968e-08	7.89222e-05	Upregulated
FQ312003_intergenic_1440240_1440459	FQ312003_intergenic_1440240_1440459	17.614	33.3251	1.90289	0.0571008	-4.13035	1.51599e-05	0.00517031	Downregulated
FQ312003_intergenic_259089_259300	FQ312003_intergenic_259089_259300	4.88391	2.10811	7.65972	3.63346	1.86134	0.000149274	0.0230308	Upregulated
FQ312003_intergenic_3271796_3271989	FQ312003_intergenic_3271796_3271989	4.51273	7.12152	1.90394	0.267351	-1.90319	0.000779812	0.0721883	Downregulated
FQ312003_intergenic_3312211_3312835	FQ312003_intergenic_3312211_3312835	4.17818	1.34638	7.00998	5.20652	2.38032	0.000226011	0.0293989	Upregulated
FQ312003_intergenic_4146761_4147078	FQ312003_intergenic_4146761_4147078	6.65558	11.9124	1.39872	0.117416	-3.09029	0.000516528	0.0548705	Downregulated
FQ312003_intergenic_4683385_4683636	FQ312003_intergenic_4683385_4683636	2.07013	0.336596	3.80366	11.3004	3.4983	0.000351934	0.0400948	Upregulated
fumA	Fumarate hydratase class I, aerobic	13.5723	21.7425	5.40219	0.248462	-2.0089	7.59335e-05	0.0158725	Downregulated
glpQ	glycerophosphoryl diester phosphodiesterase periplasmic precursor	23.8895	39.4625	8.31659	0.210747	-2.24642	0.000222408	0.0293989	Downregulated
holA	DNA polymerase III, delta subunit	6.29321	0.87002	11.7164	13.4668	3.75134	8.11406e-05	0.0159331	Upregulated
hutG	formiminoglutamase	7.78072	3.65132	11.9101	3.26187	1.7057	0.000207076	0.0293989	Upregulated
hydG	transcriptional regulatory protein	7.49637	3.07654	11.9162	3.87325	1.95354	0.000545598	0.0561187	Upregulated
iolI1	myo-inositol catabolism protein	7.98742	3.86385	12.111	3.13444	1.64821	0.00120431	0.098784	Upregulated
kbl	2-amino-3-ketobutyrate coenzyme A ligase	9.96014	5.15318	14.7671	2.86563	1.51885	3.8317e-05	0.0103456	Upregulated
lrhA	NADH dehydrogenase operon transcriptional regulator	7.37124	12.192	2.55051	0.209195	-2.25708	4.50805e-05	0.0112354	Downregulated
manX	putative mannose specific permease	2.52152	0.238182	4.80486	20.173	4.33436	4.48678e-06	0.00207674	Upregulated
pfkB	6-phosphofructokinase isozyme	8.16337	2.61006	13.7167	5.25531	2.39378	9.65334e-08	0.000104256	Upregulated
priB	primosomal replication protein N	11.069	18.5321	3.60596	0.194579	-2.36157	8.52991e-05	0.016257	Downregulated
pyrG	CTP synthase	17.3818	28.2567	6.50687	0.230277	-2.11856	0.000112586	0.0187065	Downregulated
rnd	ribonuclease D	5.00019	0.590483	9.4099	15.9359	3.99421	0.00113408	0.0942157	Upregulated
rnk	regulator of nucleoside diphosphate kinase	4.75027	7.95018	1.55037	0.19501	-2.35838	0.000834398	0.0761535	Downregulated
rplM	50S ribosomal subunit protein L13	21.3065	34.8959	7.71714	0.221147	-2.17692	5.75715e-07	0.000466329	Downregulated
rplU	50S ribosomal subunit protein L21	27.3853	47.7104	7.06027	0.147982	-2.75651	0.000148475	0.0230308	Downregulated
rpoS	RNA polymerase sigma subunit RpoS (sigma-38)	39.2109	64.3401	14.0816	0.218862	-2.19191	0.000525979	0.0549733	Downregulated
rpsG	30S ribosomal subunit protein S7	17.9643	28.1634	7.76531	0.275724	-1.8587	0.001049	0.0918582	Downregulated
rpsJ	30S ribosomal subunit protein S10	43.1145	75.0554	11.1736	0.148871	-2.74787	0.000135382	0.0219318	Downregulated
rpsK	30S ribosomal subunit protein S11	30.8336	49.0428	12.6244	0.257416	-1.95782	2.54442e-05	0.00749447	Downregulated
rpsU	30S ribosomal subunit protein S21	11.5425	22.8851	0.199817	0.00873128	-6.83959	3.37389e-09	1.09314e-05	Downregulated
rseA	sigma-E factor negative regulatory protein	21.7329	34.7474	8.71834	0.250906	-1.99478	1.06137e-05	0.00404569	Downregulated
sapF	peptide transport system ATP-binding protein SapF	4.73628	1.26368	8.20888	6.49604	2.69956	0.000226843	0.0293989	Upregulated
sciE	conserved hypothetical protein (SPI-6 associated)	4.00154	0.393655	7.60943	19.3302	4.27278	2.68302e-07	0.000248371	Upregulated
sdhB	succinate dehydrogenase iron-sulfur protein	11.3225	18.288	4.35706	0.238247	-2.06947	3.38667e-08	6.91581e-05	Downregulated
SL0083A	putative membrane protein (pseudogene)	3.81446	5.92478	1.70413	0.287627	-1.79773	0.000583694	0.0581898	Downregulated
SL1098	conserved hypothetical protein	3.03818	5.67672	0.399633	0.0703987	-3.82831	0.00110523	0.0942157	Downregulated
SL1592	conserved hypothetical protein	13.3839	22.5623	4.20541	0.186391	-2.4236	0.000635312	0.0623761	Downregulated
SL1710	putative exported protein	5.86996	9.43633	2.30358	0.244118	-2.03435	7.51183e-05	0.0158725	Downregulated
SL2281	conserved hypothetical protein	2.80161	0.295242	5.30797	17.9784	4.16819	0.000110174	0.0187065	Upregulated
SL2308	putative membrane protein	5.39731	1.68298	9.11163	5.41398	2.43669	5.60387e-06	0.00242087	Upregulated
SL2359	conserved hypothetical protein	4.43339	7.51517	1.35161	0.17985	-2.47513	0.000216021	0.0293989	Downregulated
SL2457	putative exported protein	6.89186	3.27337	10.5103	3.21087	1.68296	7.49902e-05	0.0158725	Upregulated
SL2584	putative damage-inducible protein	1.82557	0.196828	3.45431	17.5499	4.13339	0.0012271	0.0993955	Upregulated
SL2998	possible regulatory protein	3.21893	0.730252	5.7076	7.81594	2.96642	0.000436591	0.0483285	Upregulated
SL2999	conserved hypothetical protein	2.80161	0.295242	5.30797	17.9784	4.16819	0.000110174	0.0187065	Upregulated
SL3058	zinc binding dehydrogenase	5.61287	1.06685	10.1589	9.52234	3.25132	3.24896e-05	0.00915359	Upregulated
SL3249	possible monooxygenase	3.59003	0.673192	6.50687	9.6657	3.27287	1.68621e-06	0.00109266	Upregulated
SL3732	conserved hypothetical protein	2.67605	0.196828	5.15527	26.1918	4.71104	4.0896e-06	0.00203851	Upregulated
SL3757	hypothetical protein	6.33751	1.20953	11.4655	9.47932	3.24478	1.58364e-09	1.0262e-05	Upregulated
SL3959	hypothetical protein	3.9694	1.63174	6.30705	3.86523	1.95055	0.000187677	0.0282824	Upregulated
SL4151	hypothetical protein	2.62684	0.0984139	5.15527	52.3835	5.71104	6.65677e-07	0.000479288	Upregulated
SLP1_0060	predicted protein	7.36837	3.27337	11.4634	3.50201	1.80818	3.3164e-06	0.00195366	Upregulated
tatB	sec-independent protein translocase protein	11.7183	17.5291	5.90742	0.337006	-1.56915	0.000352686	0.0400948	Downregulated
tig	trigger factor	21.4674	32.3167	10.6181	0.328562	-1.60576	0.000317398	0.0395527	Downregulated
udg	UDP-glucose 6-dehydrogenase	8.33538	13.9676	2.70321	0.193535	-2.36933	0.000995333	0.0883529	Downregulated
xerD	Tyrosine recombinase xerD.	3.03818	5.67672	0.399633	0.0703987	-3.82831	0.00110523	0.0942157	Downregulated
yaeT	outer membrane protein precursor	38.768	58.8125	18.7235	0.318359	-1.65127	4.92746e-05	0.0118259	Downregulated
ybiH	hypothetical tetR-family transcriptional regulator	3.93597	1.16526	6.70669	5.75552	2.52495	0.000572164	0.0579316	Upregulated
ygjN	conserved hypothetical protein	4.22011	0.828665	7.61155	9.18531	3.19933	4.43469e-05	0.0112354	Upregulated
yihV	putative sugar kinase	5.76348	0.968434	10.5585	10.9027	3.44661	1.87621e-05	0.00607891	Upregulated
