# Supplementary material for: Transcriptome and proteome analysis of Salmonella enterica serovar Typhimurium systemic infection of wild type and immune-deficient mice
Source: PLoS One. 2017 Aug 10;12(8):e0181365. doi: 10.1371/journal.pone.0181365 (PMC5552096; doi:10.1371/journal.pone.0181365)
Supplement: S10 Table — Table showing the DE genes from the Group 2 S. Typhimurium vs Group 3 S. Typhimurium comparison. (XLS) [file pone.0181365.s010.xls]

## Sheet: Group 2 vs Group 3
Gene Name	Product Annotation	BaseMean	BaseMeanA	BaseMeanB	Fold Change	log2 Fold-Change	P-value	False Discovery Rate (FDR)	Effect
ahpC	alkyl hydroperoxide reductase c22 protein	116.136	28.177	204.096	7.24333	2.85665	7.24e-06	0.00438795	Upregulated
entE	2,3-dihydroxybenzoate-AMP ligase	7.74594	12.0757	3.41619	0.282898	-1.82164	8.84e-05	0.0316426	Downregulated
FQ312003_intergenic_2619169_2619608	FQ312003_intergenic_2619169_2619608	4.1856	1.31905	7.05216	5.34641	2.41857	0.00038807	0.0987947	Upregulated
fruB	pts system, fructose-specific IIA/FPR component	10.8485	17.7555	3.94145	0.221985	-2.17146	1.47e-07	0.000154458	Downregulated
hisF	Imidazole glycerol phosphate synthase subunit hisF	11.1633	17.2393	5.08722	0.295094	-1.76075	1.34e-05	0.00599509	Downregulated
iroB	putative glycosyltransferase	9.22844	14.7229	3.73394	0.253614	-1.97929	0.000300395	0.0898897	Downregulated
iroC	putative ABC transporter protein	12.3301	20.5168	4.14353	0.201958	-2.30787	8.62e-10	5.42e-06	Downregulated
murD	UDP-N-acetylmuramoylalanine--D-glutamate ligase	12.5295	21.2703	3.78871	0.178122	-2.48906	9.73e-06	0.00509622	Downregulated
napA	probable nitrate reductase	15.3976	26.9572	3.83804	0.142376	-2.81223	8.75e-07	0.000611089	Downregulated
nrfA	cytochrome c552, subunit of nitrite reductase complex	3.6613	6.28979	1.03282	0.164205	-2.60643	0.000393041	0.0987947	Downregulated
nrfE	formate-dependent nitrite reductase, assembly protein	5.56016	10.6039	0.516408	0.0486997	-4.35994	8.02e-07	0.000611089	Downregulated
SL0409	conserved hypothetical protein	9.06459	2.42017	15.709	6.49086	2.69841	5.16e-09	1.24e-05	Upregulated
SL0876	prismane protein homolog (hybrid-cluster protein)	12.554	20.448	4.65993	0.227892	-2.13358	5.94e-09	1.24e-05	Downregulated
SL1440	putative regulatory protein	8.17458	3.21946	13.1297	4.07823	2.02794	0.00023146	0.0727249	Upregulated
SL2312	putative sugar phosphotransferase component II B	3.58819	0.435837	6.74055	15.4658	3.95101	1.82e-05	0.00763937	Upregulated
SL2731	conserved hypothetical protein	3.89312	0.734085	7.05216	9.60673	3.26405	7.68e-06	0.00438795	Upregulated
SL4254	Putative acetyltransferase	9.18561	2.96497	15.4063	5.19609	2.37743	3e-07	0.000269644	Upregulated
ybbN	thioredoxin-like protein	5.87486	1.79505	9.95467	5.54563	2.47135	0.000225725	0.0727249	Upregulated
