# Supplementary material for: Transcriptome and proteome analysis of Salmonella enterica serovar Typhimurium systemic infection of wild type and immune-deficient mice
Source: PLoS One. 2017 Aug 10;12(8):e0181365. doi: 10.1371/journal.pone.0181365 (PMC5552096; doi:10.1371/journal.pone.0181365)
Supplement: S11 Table — (XLS) [file pone.0181365.s011.xls]

## Sheet: Reactions
Reaction ID	Reaction description
ASNS2	asparagine synthetase
PGMT	phosphoglucomutase
PMANM	phosphomannomutase
PPA	inorganic diphosphatase
G5SADs	L glutamate 5 semialdehyde dehydratase spontaneous
G1PACT	glucosamine 1 phosphate N acetyltransferase
MAN1PT2	mannose 1 phosphate guanylyltransferase GDP
PAPPT3	phospho N acetylmuramoyl pentapeptide transferase meso 2 6 diaminopimelate
PGAMT	phosphoglucosamine mutase
UAGCVT	UDP N acetylglucosamine 1 carboxyvinyltransferase
UAGDP	UDP N acetylglucosamine diphosphorylase
UAPGR	UDP N acetylenolpyruvoylglucosamine reductase
UDCPDP	undecaprenyl diphosphatase
UGMDDS	UDP N acetylmuramoyl L alanyl D glutamyl meso 2 6 diaminopimeloyl D alanyl D alanine synthetase
SERAT	serine O acetyltransferase
GLCS1	glycogen synthase ADPGlc
GLGC	glucose 1 phosphate adenylyltransferase
ATPPRT	ATP phosphoribosyltransferase
HISTD	histidinol dehydrogenase
HISTP	histidinol phosphatase
HSTPT	histidinol phosphate transaminase
IG3PS	Imidazole glycerol 3 phosphate synthase
IGPDH	imidazoleglycerol phosphate dehydratase
PRAMPC	phosphoribosyl AMP cyclohydrolase
PRATPP	phosphoribosyl ATP pyrophosphatase
CYTK1	cytidylate kinase CMP
ADSL1r	adenylsuccinate lyase
ADSS	adenylosuccinate synthase
CTPS2	CTP synthase glutamine
PPNDH	prephenate dehydratase

## Sheet: Metabolites
Metabolite ID	Metabolite description
1pyr5c[c]	1-Pyrroline-5-carboxylate
accoa[c]	Acetyl-CoA
acgam1p[c]	N-Acetyl-D-glucosamine-1-phosphate
acser[c]	O-Acetyl-L-serine
adp[c]	ADP
adpglc[c]	ADPglucose
aicar[c]	5-Amino-1-5-Phospho-D-ribosyl-imidazole-4-carboxamide
akg[c]	2-Oxoglutarate
alaala[c]	D-Alanyl-D-alanine
amp[c]	AMP
asn-L[c]	L-Asparagine
asp-L[c]	L-Aspartate
atp[c]	ATP
cdp[c]	CDP
cmp[c]	CMP
co2[c]	CO2
coa[c]	Coenzyme-A
ctp[c]	CTP
dcamp[c]	N6-1-2-Dicarboxyethyl-AMP
eig3p[c]	D-erythro-1-Imidazol-4-yl-glycerol-3-phosphate
fum[c]	Fumarate
g1p[c]	D-Glucose-1-phosphate
g6p[c]	D-Glucose-6-phosphate
gam1p[c]	D-Glucosamine-1-phosphate
gam6p[c]	D-Glucosamine-6-phosphate
gdp[c]	GDP
gdpmann[c]	GDP-D-mannose
gln-L[c]	L-Glutamine
glu-L[c]	L-Glutamate
glu5sa[c]	L-Glutamate-5-semialdehyde
glycogen[c]	glycogen
gtp[c]	GTP
h2o[c]	H2O
h[c]	H
his-L[c]	L-Histidine
hisp[c]	L-Histidinol-phosphate
histd[c]	L-Histidinol
imacp[c]	3-Imidazol-4-yl-2-oxopropyl-phosphate
imp[c]	IMP
man1p[c]	D-Mannose-1-phosphate
man6p[c]	D-Mannose-6-phosphate
nad[c]	Nicotinamide-adenine-dinucleotide
nadh[c]	Nicotinamide-adenine-dinucleotide-reduced
nadp[c]	Nicotinamide-adenine-dinucleotide-phosphate
nadph[c]	Nicotinamide-adenine-dinucleotide-phosphate-reduced
nh4[c]	Ammonium
pep[c]	Phosphoenolpyruvate
phpyr[c]	Phenylpyruvate
pi[c]	Phosphate
pphn[c]	Prephenate
ppi[c]	Diphosphate
prbamp[c]	1-5-Phosphoribosyl-AMP
prbatp[c]	1-5-Phosphoribosyl-ATP
prfp[c]	1-5-Phosphoribosyl-5-5-phosphoribosylamino-methylideneaminoimidazole-4-carboxamide
prlp[c]	5-5-phospho-1-deoxyribulos-1-ylamino-methylideneamino-1-5-phosphoribosyl-imidazole-4-carboxamide
prpp[c]	5-Phospho-alpha-D-ribose-1-diphosphate
ser-L[c]	L-Serine
uaccg[c]	UDP-N-acetyl-3-O-1-carboxyvinyl-D-glucosamine
uacgam[c]	UDP-N-acetyl-D-glucosamine
uagmda[c]	Undecaprenyl-diphospho-N-acetylmuramoyl-L-alanyl-D-glutamyl-meso-2-6-diaminopimeloyl-D-alanyl-D-alanine
uamr[c]	UDP-N-acetylmuramate
udcpdp[c]	Undecaprenyl-diphosphate
udcpp[c]	Undecaprenyl-phosphate
ugmd[c]	UDP-N-acetylmuramoyl-L-alanyl-D-gamma-glutamyl-meso-2-6-diaminopimelate
ugmda[c]	UDP-N-acetylmuramoyl-L-alanyl-D-glutamyl-meso-2-6-diaminopimeloyl-D-alanyl-D-alanine
ump[c]	UMP
utp[c]	UTP
