# Supplementary material for: Transcriptome and proteome analysis of Salmonella enterica serovar Typhimurium systemic infection of wild type and immune-deficient mice
Source: PLoS One. 2017 Aug 10;12(8):e0181365. doi: 10.1371/journal.pone.0181365 (PMC5552096; doi:10.1371/journal.pone.0181365)
Supplement: S12 Table — Table showing the lists of proteins, protein content (weight %) and the relative protein expression (log2 fold-change) of S. Typhimurium in Group 1, Group 2, and Group 3 compared to the in vitro grown Input. (XLS) [file pone.0181365.s012.xls]

## Sheet: Sheet1
Protein list				Protein content (weight%) for multiple protein id in the same PHN (same set)				Log2 Fold-change
(Multiple protein Ids based on the same set of matched peptides)				(Only one entry is used in the protein content calculation)				(Group comparisons)
Protein Accession No	Gene	Protein Description	Protein Mr	uninfected mouse	Group 1	Group 2	Group 3	Group 1/Group2	Group 1/Group 3	Group 2/Group 3
SL1344_0002	thrA	SL1344_0002 aspartokinase I/homoserine dehydrogenase I 337:2799 forward MW:88696	88639	0.00414687	0.00324294	0.47315	0.27127	0	-8.25267	-8.25267
SL1344_0003	thrB	SL1344_0003 Homoserine kinase 2801:3730 forward MW:33286	33265	0	0	0	3.05166e-05	0	0	0
SL1344_0004	thrC	SL1344_0004 threonine synthase 3734:5020 forward MW:46988	46958	0	0	0	0	-6.39446	-6.09011	0.30435
SL1344_0005	yaaA	SL1344_0005 conserved hypothetical protein 5114:5887 reverse MW:29764	29745	0	7.8789e-07	6.73333e-05	5.44878e-05	0	-6.37504	-6.37504
SL1344_0007	talB	SL1344_0007 transaldolase B 7665:8618 forward MW:35171	35149	0	0	0	8.3442e-06	-6.33526	-5.74031	0.594952
SL1344_0008	mog	SL1344_0008 molybdopterin biosynthesis Mog protein 8729:9319 forward MW:21363	21350	0	6.99277e-06	0.000565204	0.000374238	0	0	0
SL1344_0009	yaaH	SL1344_0009 conserved hypothetical protein 9376:9942 reverse MW:19933	19921	0	0	0	0	0	0	0
SL1344_0012	dnaK	SL1344_0012 Chaperone protein dnaK 11593:13509 forward MW:69258	69216	0	0	0	0	-8.58878	-8.04985	0.538931
SL1344_0013	dnaJ	SL1344_0013 DnaJ protein 13595:14734 forward MW:41313	41287	0	1.16135e-05	0.00446621	0.00307403	-8.40088	-8.17991	0.22097
SL1344_0040	nhaA	SL1344_0040 Na(+)/H(+) antiporter 1 46190:47356 forward MW:41351	41324	0	0	3.38295e-05	2.8955e-05	0	0	0
SL1344_0041	nhaR	SL1344_0041 transcriptional activator protein NhaR 47418:48317 forward MW:33998	33976	0	0	0	0	0	0	0
SL1344_0044	rpsT	SL1344_0044 30S ribosomal protein S20 52280:52543 reverse MW:9655	9649	0	0	0	0	-3.80284	-6.42322	-2.62038
SL1344_0046	ribF	SL1344_0046 riboflavin biosynthesis protein RibF 52872:53810 forward MW:34271	34249	0	1.59584e-05	0.000223349	0.00137308	0	0	0
SL1344_0047	ileS	SL1344_0047 isoleucyl-tRNA synthetase 53855:56689 forward MW:105703	105635	0	0	0	0	-10.3421	-11.0828	-0.74074
SL1344_0048	lspA	SL1344_0048 lipoprotein signal peptidase 56689:57189 forward MW:18338	18327	0	0	0.000129832	0.000216861	0	0	0
SL1344_0049	fkpB	SL1344_0049 probable FkbB-type 16 kD peptidyl-prolyl cis- trans isomerase 57344:57793 forward MW:16093	16083	0	0	0	0	0	0	0
SL1344_0050	ispH	SL1344_0050 LytB protein 57796:58746 forward MW:34527	34506	0	0	0	0	0	0	0
SL1344_0052	rihC	SL1344_0052 hypothetical nucleoside hydrolase (IUNH family) 60164:61084 forward MW:33122	33101	0	0	0	0	0	-5.39232	-5.39232
SL1344_0053	citB	SL1344_0053 transcriptional regulatory protein citb 61106:61792 reverse MW:25996	25980	0	0	0	4.22075e-06	0	0	0
SL1344_0065	dapB	SL1344_0065 dihydrodipicolinate reductase 74020:74841 forward MW:28851	28833	0	0	0	0	0	-5.32193	-5.32193
SL1344_0067	carA	SL1344_0067 carbamoyl-phosphate synthase small chain 75883:77031 forward MW:41651	41625	0	0	0	4.04418e-06	0	-8.47573	-8.47573
SL1344_0068	carB	SL1344_0068 carbamoyl-phosphate synthase large chain 77050:80277 forward MW:118140	118064	0	0	0	3.55613e-05	0	-10.585	-10.585
SL1344_0069	caiF	SL1344_0069 transcriptional activator CaiF 80551:80946 forward MW:15409	15399	0	0	0	0.000153556	0	0	0
SL1344_0071	caiD	SL1344_0071 carnitine racemase 81728:82513 reverse MW:28106	28088	0	0	0	0	0	0	0
SL1344_0081	0	SL1344_0081 hypothetical lipoprotein 93610:93840 forward MW:8217	8212	0	0	0	0	0	0	0
SL1344_0082	0	SL1344_0082 probable secreted protein 94134:94550 forward MW:15409	15400	0	0	0	0	0	0	0
SL1344_0083	0	SL1344_0083 probable secreted protein 94774:95064 reverse MW:10302	10296	0	0	0	0	0	-7.41785	-7.41785
SL1344_0088	folA	SL1344_0088 dihydrofolate reductase type I 100842:101321 forward MW:17998	17987	0	0	0	1.70671e-05	0	0	0
SL1344_0089	apaH	SL1344_0089 bis(5~-nucleosyl)-tetraphosphatase 101427:102275 reverse MW:31431	31411	0	0	0	0	0	0	0
SL1344_0090	apaG	SL1344_0090 CorD protein 102286:102663 reverse MW:13923	13915	0	0	0	0	0	0	0
SL1344_0091	ksgA	SL1344_0091 dimethyladenosine transferase 102666:103487 reverse MW:30516	30497	0	0	0	0	0	-5.2854	-5.2854
SL1344_0092	pdxA	SL1344_0092 pyridoxal phosphate biosynthetic protein PdxA 103484:104473 reverse MW:34805	34783	0	0	0	3.88871e-06	0	-5.32193	-5.32193
SL1344_0093	surA	SL1344_0093 survival protein SurA precursor 104473:105759 reverse MW:47251	47221	0	0	0	3.9917e-06	-10.8439	-10.6294	0.214564
SL1344_0094	imp	SL1344_0094 organic solvent tolerance protein precursor 105813:108173 reverse MW:89823	89766	0	0	0.000183785	0.000158358	-8.10852	-10.1319	-2.02333
SL1344_0095	djlA	SL1344_0095 DnaJ-like protein 108427:109239 forward MW:30583	30563	0	0	2.7582e-05	0.000112172	0	0	0
SL1344_0097	hepA	SL1344_0097 probable ATP-dependent helicase HepA 110005:112911 reverse MW:109866	109797	0	0	0	0	-8.3966	-7.71425	0.682359
SL1344_0098	polB	SL1344_0098 DNA polymerase II 113085:115436 reverse MW:89993	89936	0	0	3.37368e-05	2.10005e-05	0	0	0
SL1344_0104	araC	SL1344_0104 arabinose operon regulatory protein 121643:122488 forward MW:32070	32050	0	0	0	0	0	0	0
SL1344_0108	tbpA	SL1344_0108 thiamine-binding periplasmic protein precursor 125690:126673 reverse MW:36263	36241	0	0	0	0	0	-5.39232	-5.39232
SL1344_0110	leuD	SL1344_0110 3-isopropylmalate dehydratase small subunit 129060:129665 reverse MW:22506	22492	0	0	0	4.15902e-06	0	0	0
SL1344_0111	leuC	SL1344_0111 3-isopropylmalate dehydratase large subunit 129676:131076 reverse MW:49786	49754	0	0	0	0	0	0	0
SL1344_0112	leuB	SL1344_0112 3-isopropylmalate dehydrogenase 131079:132170 reverse MW:39513	39488	0	0	0	0	-8.33985	0	8.33985
SL1344_0113	leuA	SL1344_0113 2-isopropylmalate synthase 132170:133741 reverse MW:57431	57395	0	0	3.23555e-05	0	0	-5.20945	-5.20945
SL1344_0116	ilvI	SL1344_0116 acetolactate synthase isozyme III large subunit 135901:137562 forward MW:60625	60586	0	0	0	3.65925e-06	0	-6.40939	-6.40939
SL1344_0117	ilvH	SL1344_0117 acetolactate synthase isozyme III small subunit 137565:138056 forward MW:18063	18052	0	0	0	8.49793e-06	0	0	0
SL1344_0118	fruR	SL1344_0118 fructose repressor 138340:139344 forward MW:38041	38018	0	0	0	0	0	-7.89482	-7.89482
SL1344_0119	mraZ	SL1344_0119 conserved hypothetical protein. 139950:140408 forward MW:17435	17424	0	0	0	2.37538e-05	0	0	0
SL1344_0120	mraW	SL1344_0120 S-adenosyl-methyltransferase 140410:141351 forward MW:34776	34754	0	0	0	0	0	-7.05528	-7.05528
SL1344_0121	ftsL	SL1344_0121 cell division protein FtsL 141348:141713 forward MW:13586	13577	0	0	0	1.32946e-05	0	0	0
SL1344_0122	ftsI	SL1344_0122 penicillin-binding protein 3 precursor 141729:143495 forward MW:63846	63805	0	0	0	0	0	-6.33985	-6.33985
SL1344_0123	murE	SL1344_0123 UDP-N-acetylmuramoylalanyl-D-glutamate--2,6-di a minopimelate ligase 143482:144969 forward MW:53287	53253	0	0	0	8.13585e-06	-8.35315	-6.33985	2.0133
SL1344_0124	murF	SL1344_0124 UDP-N-acetylmuramoylalanyl-D-glutamyl-2,6-diam i nopimelate--D-alan alanyl ligase 144966:146324 forward MW:47533	47504	0	0	3.27256e-05	8.14842e-06	0	-6.98868	-6.98868
SL1344_0125	mraY	SL1344_0125 Phospho-N-acetylmuramoyl-pentapeptide-transfera se 146318:147400 forward MW:40023	39997	0	0	0	1.27203e-05	0	0	0
SL1344_0126	murD	SL1344_0126 UDP-N-acetylmuramoylalanine--D-glutamate ligase 147403:148719 forward MW:46998	46968	0	0	0	0	0	-5.39232	-5.39232
SL1344_0128	murG	SL1344_0128 UDP-N-acetylglucosamine--N-acetylmuramyl- 149960:151027 forward MW:37863	37839	0	0	0	4.19226e-06	0	-7.02237	-7.02237
SL1344_0129	murC	SL1344_0129 UDP-N-acetylmuramate--L-alanine ligase 151146:152621 forward MW:53438	53404	0	0	0	1.30272e-05	-8.35755	-7.46761	0.889946
SL1344_0130	ddl	SL1344_0130 D-alanine--D-alanine ligase 152614:153534 forward MW:32635	32615	0	0	3.28184e-05	1.7705e-05	0	-7.05528	-7.05528
SL1344_0131	ftsQ	SL1344_0131 cell division protein FtsQ 153536:154366 forward MW:31136	31117	0	0	0	1.33081e-05	0	0	0
SL1344_0132	ftsA	SL1344_0132 cell division protein FtsA 154363:155625 forward MW:45314	45285	0	0	0	0	-8.3443	-6.98868	1.35561
SL1344_0133	ftsZ	SL1344_0133 cell division protein FtsZ 155686:156837 forward MW:40324	40299	0	0	3.24672e-05	1.27035e-05	-6.58996	-7.18256	-0.592597
SL1344_0134	lpxC	SL1344_0134 UDP-3-O-[3-hydroxymyristoyl] N-acetylglucosamine deacetylase 156938:157855 forward MW:33985	33963	0	1.54551e-06	0.000144462	0.000217875	0	0	0
SL1344_0136	secA	SL1344_0136 preprotein translocase SecA subunit 158693:161398 forward MW:101827	101762	0	0	0	0	-8.21848	-8.88482	-0.666348
SL1344_0137	mutT	SL1344_0137 7,8-dihydro-8-oxoguanine-triphosphatase 161550:161945 forward MW:15081	15072	0	7.31754e-07	0.000208453	0.000330883	0	0	0
SL1344_0138	yacG	SL1344_0138 conserved hypothetical protein 162267:162458 reverse MW:7049	7045	0	0	0	0	0	0	0
SL1344_0139	yacF	SL1344_0139 conserved hypothetical protein 162468:163211 reverse MW:28368	28350	0	0	0	0	0	0	0
SL1344_0140	coaE	SL1344_0140 Dephospho-CoA kinase 163211:163831 reverse MW:22795	22781	0	0	0	0	0	0	0
SL1344_0141	guaC	SL1344_0141 GMP reductase 164057:165100 forward MW:37138	37115	0	0	0	0	0	-5.42626	-5.42626
SL1344_0145	nadC	SL1344_0145 nicotinate-nucleotide pyrophosphorylase 168377:169123 reverse MW:27180	27163	0	0	0	4.25932e-06	0	-5.39232	-5.39232
SL1344_0146	ampD	SL1344_0146 AmpD protein (anhydro-N-acetylmuramyl-tripeptide amidase) 169358:169921 forward MW:20912	20899	0	0	0	4.1563e-06	0	0	0
SL1344_0147	ampE	SL1344_0147 AmpE protein 169918:170772 forward MW:32124	32103	0	0	0	0	0	0	0
SL1344_0151	pdhR	SL1344_0151 pyruvate dehydrogenase complex repressor 175320:176084 forward MW:29411	29393	0	0	0	0	0	0	0
SL1344_0152	aceE	SL1344_0152 pyruvate dehydrogenase E1 component 176244:178907 forward MW:99580	99517	0	0	0	0	-6.36018	-7.9169	-1.55673
SL1344_0153	aceF	SL1344_0153 dihydrolipoamide acetyltransferase component (E2) of pyruvate dehydrogenase 178922:180811 forward MW:66055	66013	0	6.67903e-06	0.000550406	0.00161918	-12.4543	-14.1968	-1.74253
SL1344_0154	lpdA	SL1344_0154 dihydrolipoamide dehydrogenase 181011:182435 forward MW:50640	50608	0	0	0.000561177	0.00187792	-1.64172	-5.01185	-3.37013
SL1344_0159	acnB	SL1344_0159 aconitate hydratase 2 (citrate hydro-lyase 2) 185853:188450 forward MW:93530	93470	0	2.15922e-05	6.73837e-05	0.000696933	-7.94335	-8.00643	-0.0630742
SL1344_0160	0	SL1344_0160 HNH endonuclease 188511:189353 reverse MW:32672	32652	0	6.72128e-07	0.000172321	0.000179969	0	0	0
SL1344_0161	yacL	SL1344_0161 conserved hypothetical protein 189599:189961 forward MW:13888	13879	0	0	0	0	0	0	0
SL1344_0163	0	SL1344_0163 conserved hypothetical protein 191146:192417 forward MW:44986	44957	0	0	0	0	0	0	0
SL1344_0164	pdxA	SL1344_0164 4-hydroxythreonine-4-phosphate dehydrogenase 192407:193390 forward MW:35064	35042	0	0	0	0	0	0	0
SL1344_0165	0	SL1344_0165 hypothetical transcriptional regulator 193400:194167 forward MW:27862	27845	0	0	0	0	0	-6.40939	-6.40939
SL1344_0166	speD	SL1344_0166 S-adenosylmethionine decarboxylase, proenzyme 194197:194991 reverse MW:30414	30395	0	0	0	8.52131e-06	0	-7.08746	-7.08746
SL1344_0167	speE	SL1344_0167 Spermidine synthase 195012:195872 reverse MW:32095	32074	0	0	0	1.3565e-05	0	0	0
SL1344_0169	cueO	SL1344_0169 possible multicopper oxidase precursor 196528:198138 forward MW:58626	58587	0	0	0	0	0	-5.20945	-5.20945
SL1344_0170	gcd	SL1344_0170 glucose dehydrogenase 198216:200606 reverse MW:86495	86440	0	0	0	3.73525e-06	0	-6.26679	-6.26679
SL1344_0171	hpt	SL1344_0171 hypoxanthine phosphoribosyltransferase 200812:201348 forward MW:20068	20055	0	0	0	7.71544e-06	0	0	0
SL1344_0172	yadF	SL1344_0172 carbonic anhydrase 201406:202068 reverse MW:24821	24806	0	0	0	0	0	0	0
SL1344_0173	yadG	SL1344_0173 hypothetical ABC transporter ATP-binding protein 202177:203103 forward MW:34684	34662	0	0	0	0	0	0	0
SL1344_0181	panD	SL1344_0181 aspartate 1-decarboxylase 211027:211407 reverse MW:13886	13878	0	0	0	0	0	-6.52356	-6.52356
SL1344_0182	panC	SL1344_0182 Pantoate--beta-alanine ligase 211502:212356 reverse MW:31858	31838	0	0	0	9.20192e-06	0	-7.06609	-7.06609
SL1344_0183	panB	SL1344_0183 3-methyl-2-oxobutanoate hydroxymethyltransferase 212482:213273 reverse MW:28105	28087	0	0	0	1.3397e-05	0	-5.2854	-5.2854
SL1344_0184	folK	SL1344_0184 2-amino-4-hydroxy-6- hydroxymethyldihydropteridine pyrophosphokinase 213394:213873 reverse MW:17742	17731	0	0	0	3.93955e-06	0	0	0
SL1344_0185	pcnB	SL1344_0185 poly(A) polymerase 213870:215288 reverse MW:54677	54642	0	0	0	0	3	-4.8009	-7.8009
SL1344_0186	yadB	SL1344_0186 glutamyl-tRNA synthetase-related protein 215429:216370 reverse MW:35132	35110	0	7.85843e-07	0	2.22959e-05	0	0	0
SL1344_0187	dksA	SL1344_0187 dosage-dependent dnaK suppressor protein 216394:216849 reverse MW:17515	17505	0	0	0	0	-5.33539	3	8.33539
SL1344_0188	sfsA	SL1344_0188 Sugar fermentation stimulation protein homolog. 217026:217730 reverse MW:26160	26143	0	7.55254e-07	3.22721e-05	0	0	0	0
SL1344_0189	ligT	SL1344_0189 2~-5~ RNA ligase 217747:218277 reverse MW:19650	19638	0	0	0	0	0	0	0
SL1344_0190	hrpB	SL1344_0190 ATP-dependent helicase HrpB 218305:220779 forward MW:90845	90787	0	0	0	0	0	0	0
SL1344_0191	mrcB	SL1344_0191 penicillin-binding protein 1b; peptidoglycan synthetase 220920:223442 forward MW:93868	93808	0	0	0	0	-8.16993	-8.28077	-0.110846
SL1344_0192	fhuA	SL1344_0192 ferrichrome-iron receptor 223735:225924 forward MW:80627	80576	0	0	2.8824e-05	3.11001e-05	0	-11.2556	-11.2556
SL1344_0203	hemL	SL1344_0203 Glutamate-1-semialdehyde 2,1-aminomutase 237207:238487 reverse MW:45325	45295	0	0	0	0.000244529	-5.3443	-3.98868	1.35561
SL1344_0204	clcA	SL1344_0204 hypothetical membrane protein 238657:240078 forward MW:50423	50390	0	7.59988e-07	3.24744e-05	1.27064e-05	0	0	0
SL1344_0205	yadR	SL1344_0205 conserved hypothetical protein 240160:240504 forward MW:12099	12092	0	0	0	0	0	-5.39232	-5.39232
SL1344_0207	btuF	SL1344_0207 Vitamin B12 transport protein btuF precursor. 241265:242065 reverse MW:29284	29266	0	0	0	4.16303e-06	0	0	0
SL1344_0208	mtn	SL1344_0208 MTA/SAH nucleosidase 242058:242756 reverse MW:24446	24431	0	0	0	0	0	0	0
SL1344_0209	dgt	SL1344_0209 Deoxyguanosinetriphosphate triphosphohydrolase 243051:244358 forward MW:51156	51124	0	0	0	0	0	0	0
SL1344_0210	htrA	SL1344_0210 protease DO precursor; heat shock protein HtrA 244488:245915 forward MW:49315	49284	0	0	0	0	-6.56415	-6.48045	0.0836959
SL1344_0211	cdaR	SL1344_0211 conserved hypothetical protein 246068:247225 forward MW:43587	43559	0	2.36262e-06	0.000227149	0.000214293	0	0	0
SL1344_0212	yaeH	SL1344_0212 conserved hypothetical protein 247314:247700 reverse MW:15094	15085	0	0	0	0	3	-7.49285	-10.4929
SL1344_0214	dapD	SL1344_0214 2,3,4,5-tetrahydropyridine-2-carboxylate N-succinyltransferase 249285:250109 reverse MW:29852	29833	0	7.59316e-07	0	0.000144071	-7.06205	-6.59246	0.469589
SL1344_0215	glnD	SL1344_0215 [Protein-PII] uridylyltransferase 250139:252811 reverse MW:102266	102200	0	7.86589e-07	0.000106944	7.7222e-05	0	0	0
SL1344_0216	map	SL1344_0216 methionine aminopeptidase 253048:253842 reverse MW:29292	29273	0	0	0	0	0	-7.06609	-7.06609
SL1344_0217	rpsB	SL1344_0217 30S ribosomal protein S2 254293:255018 forward MW:26758	26742	0	0	0	1.34375e-05	-5.17143	-5.49016	-0.318734
SL1344_0218	tsf	SL1344_0218 Elongation factor Ts 255276:256127 forward MW:30358	30339	0	1.32685e-05	0.000479319	0.000597756	-6.91228	-7.53977	-0.627485
SL1344_0219	pyrH	SL1344_0219 Uridylate kinase 256272:256997 forward MW:25955	25939	0	8.87195e-06	0.00107204	0.00165613	-6.62519	-2.51457	4.11061
SL1344_0220	frr	SL1344_0220 Ribosome recycling factor 257144:257701 forward MW:20555	20543	0	7.46093e-07	6.90747e-05	3.96901e-06	-4.72691	-2.9386	1.78831
SL1344_0221	dxr	SL1344_0221 1-deoxy-D-xylulose 5-phosphate reductoisomerase 257842:259038 forward MW:43353	43325	0	2.65898e-06	7.15377e-05	2.06937e-05	0	0	0
SL1344_0222	uppS	SL1344_0222 undecaprenyl pyrophosphate synthetase 259351:260109 forward MW:28328	28310	0	0	0	0	0	0	0
SL1344_0224	yaeL	SL1344_0224 hypothetical membrane protein 260991:262343 forward MW:49185	49153	0	0	0	0	0	0	0
SL1344_0225	yaeT	SL1344_0225 outer membrane protein precursor 262375:264789 forward MW:89527	89471	0	0	0	0	-10.4252	-12.0355	-1.61027
SL1344_0226	hlpA	SL1344_0226 outer membrane protein OmpH precursor 264912:265397 forward MW:17905	17894	0	0	0.000137457	0.000419835	-6.33016	-0.858824	5.47133
SL1344_0227	lpxD	SL1344_0227 UDP-3-O-[3-hydroxymyristoyl] glucosamine N-acyltransferase 265401:266426 forward MW:35930	35907	0	1.18379e-05	0.000949357	2.14478e-05	0	-5.35755	-5.35755
SL1344_0228	fabZ	SL1344_0228 (3R)-hydroxymyristol acyl carrier protein dehydrase 266532:266987 forward MW:16999	16988	0	0	0	4.12069e-06	0	-7.19967	-7.19967
SL1344_0229	lpxA	SL1344_0229 Acyl-[acyl-carrier-protein]--UDP-N-acetylglucos amine O-acyltransferase 266991:267779 forward MW:28089	28071	0	0	0	1.47299e-05	-8.30378	-7.98868	0.315096
SL1344_0230	lpxB	SL1344_0230 Lipid-A-disaccharide synthase 267779:268927 forward MW:42452	42424	0	0	3.16259e-05	2.54135e-05	0	0	0
SL1344_0231	rnhB	SL1344_0231 ribonuclease HII 268924:269520 forward MW:21507	21493	0	0	0	0	0	0	0
SL1344_0232	dnaE	SL1344_0232 DNA polymerase III, alpha chain 269544:273026 forward MW:130200	130116	0	0	0	0	0	0	0
SL1344_0233	accA	SL1344_0233 acetyl-coenzyme A carboxylase carboxyl transferase subunit alpha 273039:273998 forward MW:35344	35321	0	0	0	0	-8.34873	-10.2046	-1.85584
SL1344_0235	ldcC	SL1344_0235 lysine decarboxylase 276017:278158 forward MW:80764	80711	0	0	3.25588e-05	0.000118	0	0	0
SL1344_0236	yaeR	SL1344_0236 conserved hypothetical protein 278214:278603 forward MW:14809	14799	0	0	0	0	0	0	0
SL1344_0238	rof	SL1344_0238 ROF protein 280042:280296 reverse MW:9394	9389	0	0	0	0	0	0	0
SL1344_0239	yaeP	SL1344_0239 Hypothetical UPF0253 protein <ORFName>. 280289:280507 reverse MW:7720	7716	0	0	0	0	0	0	0
SL1344_0240	yaeQ	SL1344_0240 conserved hypothetical protein 280687:281232 forward MW:20835	20823	0	0	0	0	0	0	0
SL1344_0242	cutF	SL1344_0242 copper homeostasis protein CutF precursor (lipoprotein nlpE) 281683:282384 forward MW:25225	25210	0	0	0	0	0	0	0
SL1344_0243	proS	SL1344_0243 prolyl-tRNA synthetase 282458:284176 reverse MW:63540	63500	0	0	0	0	-7.41574	-7.46862	-0.0528823
SL1344_0244	yaeB	SL1344_0244 conserved hypothetical protein 284287:284994 reverse MW:26294	26278	0	7.6103e-07	0.000136579	0.000141697	0	0	0
SL1344_0245	rcsF	SL1344_0245 RcsF protein 284991:285395 reverse MW:14189	14180	0	0	0	0	3	-4.26679	-7.26679
SL1344_0246	metQ	SL1344_0246 hypothetical lipoprotein precursor 285514:286329 reverse MW:29435	29418	0	7.8174e-07	0	1.53689e-05	-4.79286	-6.31904	-1.52618
SL1344_0247	yaeE	SL1344_0247 hypothetical ABC transporter permease protein 286368:287021 reverse MW:23249	23234	0	2.53848e-06	6.93e-05	0.00019956	0	0	0
SL1344_0248	abc	SL1344_0248 hypothetical ABC transporter ATP-binding protein 287014:288045 reverse MW:37661	37638	0	0	0	0	0	-7.02237	-7.02237
SL1344_0249	yaeD	SL1344_0249 conserved hypothetical protein 288235:288801 forward MW:20920	20906	0	0	0	1.2958e-05	0	0	0
SL1344_0250	dkgB	SL1344_0250 hypothetical oxidoreductase 295060:295863 forward MW:29180	29162	0	0	0	0	0	0	0
SL1344_0251	yafC	SL1344_0251 hypothetical transcriptional regulator 295884:296798 reverse MW:33899	33878	0	0	0	0	0	0	0
SL1344_0253	yafD	SL1344_0253 hypothetical protein 298231:299010 forward MW:29065	29047	0	0	0	0	0	0	0
SL1344_0254	yafE	SL1344_0254 hypothetical methyltransferase 299088:299858 forward MW:28388	28370	0	0	0	0	0	0	0
SL1344_0256	gloB	SL1344_0256 probable hydroxyacylglutathione hydrolase 301353:302108 reverse MW:28633	28615	0	0	0	0	0	0	0
SL1344_0258	rnhA	SL1344_0258 ribonuclease H 302862:303329 reverse MW:17509	17499	0	0	0	0	0	0	0
SL1344_0259	dnaQ	SL1344_0259 DNA polymerase III epsilon subunit 303393:304124 forward MW:27225	27208	0	0	0	0	0	0	0
SL1344_0288	sciX	SL1344_0288 conserved hypothetical protein (SPI-6 associated) 337307:337753 forward MW:17472	17462	0	0	0	0	0	0	0
SL1344_0300	sinR	SL1344_0300 LysR-family transcriptional regulator (SPI-6 associated) 348088:349035 forward MW:36324	36301	0	0	0	0	0	0	0
SL1344_0302	pagN	SL1344_0302 possible outer membrane adhesin 349371:350090 reverse MW:25708	25692	0	0	0	0	-2.57236	1.56009	4.13245
SL1344_0303	sciZ	SL1344_0303 probable secreted protein (SPI-6 associated) 350421:350828 reverse MW:15139	15130	0	1.15159e-05	6.84169e-05	3.93122e-06	0	0	0
SL1344_0304	yafV	SL1344_0304 possible hydrolase 351199:351966 reverse MW:29063	29045	0	0	0	0	0	0	0
SL1344_0305	fadE	SL1344_0305 possible acyl-CoA dehydrogenase 352075:354519 reverse MW:89217	89160	0	0	0	0	-8.51175	-7.41785	1.0939
SL1344_0306	gmhA	SL1344_0306 Phosphoheptose isomerase 354759:355337 forward MW:20896	20883	0	0	3.65277e-05	1.70533e-05	0	0	0
SL1344_0307	yafJ	SL1344_0307 conserved hypothetical protein 355550:356317 forward MW:28670	28651	0	0	0	0	0	0	0
SL1344_0312	pepD	SL1344_0312 aminoacyl-histidine dipeptidase precursor 360451:361908 reverse MW:52437	52404	0	0	0	0	0	-10.2715	-10.2715
SL1344_0313	gpt	SL1344_0313 xanthine-guanine phosphoribosyltransferase 362157:362615 forward MW:16969	16959	0	0	0	0.000123619	0	0	0
SL1344_0314	frsA	SL1344_0314 conserved hypothetical protein 362704:363948 forward MW:47160	47130	0	0	0	0	0	0	0
SL1344_0315	crl	SL1344_0315 curlin genes transcriptional activator 364006:364407 forward MW:15797	15787	0	0	0	0	0	0	0
SL1344_0316	phoE	SL1344_0316 outer membrane pore protein E precursor 364458:365510 reverse MW:38762	38739	0	0	0	0	0	0	0
SL1344_0317	proB	SL1344_0317 glutamate 5-kinase 365793:366896 forward MW:39141	39116	0	0	0	0	-8.32643	-7.49185	0.834576
SL1344_0318	proA	SL1344_0318 gamma-glutamyl phosphate reductase 366908:368158 forward MW:44666	44637	0	0	3.20506e-05	1.79558e-05	0	-6.40939	-6.40939
SL1344_0322	0	SL1344_0322 conserved hypothetical protein 370217:370540 forward MW:11858	11851	0	0	0	8.53757e-06	0	0	0
SL1344_0339	0	SL1344_0339 possible transmembrane regulator 388268:389011 forward MW:28032	28014	0	0	0	0	0	0	0
SL1344_0340	0	SL1344_0340 hypothetical protein 388984:389472 forward MW:18488	18477	0	0	0	0	0	0	0
SL1344_0344	0	SL1344_0344 probable lipoprotein 391476:391835 forward MW:12634	12626	0	0	0	0	0	0	0
SL1344_0352	mod	SL1344_0352 type III restriction-modification system enzyme (StyLTI) modification methylase 402817:404775 forward MW:73337	73291	0	0	0	0	0	-8.74819	-8.74819
SL1344_0353	res	SL1344_0353 type III restriction-modification system enzyme (StyLTI) (ec 3.1.21.5) 404782:407757 forward MW:113521	113449	0	0	0	4.29889e-05	0	-6.44294	-6.44294
SL1344_0358	0	SL1344_0358 AraC-family transcriptional regulator 410999:412003 forward MW:37393	37369	0	0	0	8.6796e-06	2.80735	2.80735	0
SL1344_0359	foxA	SL1344_0359 ferrioxamine B receptor precursor 412149:414257 forward MW:77702	77653	0	7.16572e-07	0	0	0	-9.64746	-9.64746
SL1344_0361	yahO	SL1344_0361 probable secreted protein 415162:415437 forward MW:9919	9913	0	0	0	8.02031e-05	0	-6.62936	-6.62936
SL1344_0363	prpB	SL1344_0363 carboxyvinyl-carboxyphosphonate phosphorylmutase 417463:418350 forward MW:31999	31980	0	0	0	9.85934e-06	0	0	0
SL1344_0364	prpC	SL1344_0364 methylcitrate synthase 418473:419642 forward MW:43173	43146	0	0	0	0	0	0	0
SL1344_0365	prpD	SL1344_0365 PrpD protein 419682:421133 forward MW:53787	53752	0	0	0	0	0	0	0
SL1344_0366	prpE	SL1344_0366 PrpE protein 421174:423060 forward MW:69334	69290	0	0	0	0	0	0	0
SL1344_0367	hemB	SL1344_0367 delta-aminolevulinic acid dehydratase 423164:424138 reverse MW:35548	35525	0	0	0	0	0	0	0
SL1344_0371	sbmA	SL1344_0371 probable ABC-transporter inner membrane protein SbmA 429947:431065 forward MW:42615	42587	0	0	0	0	0	0	0
SL1344_0372	yaiW	SL1344_0372 hypothetical lipoprotein 431080:432174 forward MW:40255	40230	0	0	0	0	0	0	0
SL1344_0375	ddl	SL1344_0375 D-alanine:D-alanine ligase A 433029:434123 reverse MW:39357	39332	0	0	0	0	0	-7.88264	-7.88264
SL1344_0378	yaiB	SL1344_0378 conserved hypothetical protein 436585:436851 forward MW:10113	10106	0	0	0	2.35718e-05	4.16993	-4.48113	-8.65105
SL1344_0379	psiF	SL1344_0379 phosphate starvation-inducible protein PsiF 437203:437523 forward MW:11609	11602	0	1.84099e-06	0	4.02052e-05	0	0	0
SL1344_0381	proC	SL1344_0381 pyrroline-5-carboxylate reductase 438742:439551 reverse MW:28062	28043	0	0	0	0	0	0	0
SL1344_0382	yaiI	SL1344_0382 conserved hypothetical protein 439691:440146 forward MW:16945	16935	0	0	0	0	0	0	0
SL1344_0383	aroL	SL1344_0383 shikimate kinase II 440331:440876 forward MW:19803	19791	0	0	0	0	0	0	0
SL1344_0385	aroM	SL1344_0385 AroM protein 441345:442022 forward MW:24602	24586	0	0	0	0	0	0	0
SL1344_0386	yaiE	SL1344_0386 conserved hypothetical protein 442093:442377 forward MW:10158	10152	0	0	0	0	0	-5.42626	-5.42626
SL1344_0387	rdgC	SL1344_0387 recombination associated protein RdgC 442415:443326 reverse MW:33976	33955	0	0	0	4.27183e-06	0	-5.2854	-5.2854
SL1344_0388	yajF	SL1344_0388 hypothetical ROK-family protein 443452:444360 forward MW:32279	32259	0	0	0	3.89668e-06	0	0	0
SL1344_0390	sbcC	SL1344_0390 exonuclease SbcC 445727:448867 reverse MW:117825	117753	0	0	0	0	0	0	0
SL1344_0392	phoB	SL1344_0392 phosphate regulon transcriptional regulatory protein PhoB 450281:450970 forward MW:26403	26386	0	0	0	0	3	3	0
SL1344_0393	phoR	SL1344_0393 phosphate regulon sensor protein PhoR 451040:452335 forward MW:49456	49424	0	7.5895e-07	0	0	0	0	0
SL1344_0394	brnQ	SL1344_0394 branched chain amino acid transport system II carrier protein 452744:454063 forward MW:46221	46191	0	0	0	0	0	0	0
SL1344_0397	tsaA	SL1344_0397 alkyl hydroperoxide reductase 457559:458161 reverse MW:22317	22303	0	0	0	0	-5.15628	-0.959358	4.19692
SL1344_0399	queA	SL1344_0399 S-adenosylmethionine:tRNA ribosyltransferase- isomerase 459046:460110 forward MW:39256	39231	0	1.79623e-05	0.000641892	3.49797e-05	0	0	0
SL1344_0400	tgt	SL1344_0400 queuine tRNA-ribosyltransferase; tRNA-guanine transglycosylase 460307:461434 forward MW:42522	42494	0	0	0	0	0	0	0
SL1344_0401	yajC	SL1344_0401 hypothetical membrane protein 461457:461789 forward MW:11844	11836	0	0	0	0	3	-7.62205	-10.6221
SL1344_0402	secD	SL1344_0402 protein-export membrane protein SecD 461817:463664 forward MW:66606	66564	0	7.94367e-07	0	0.000157563	0	-10.3242	-10.3242
SL1344_0403	secF	SL1344_0403 protein-export membrane protein SecF 463675:464646 forward MW:35376	35354	0	0	0	0.000128164	0	-5.35755	-5.35755
SL1344_0406	yajD	SL1344_0406 conserved hypothetical protein 466047:466394 forward MW:13306	13298	0	0	0	4.05723e-06	0	0	0
SL1344_0407	tsx	SL1344_0407 nucleoside-specific channel-forming protein tsx precursor 467023:467886 reverse MW:32778	32758	0	0	0	0	0	-8.27146	-8.27146
SL1344_0408	yajI	SL1344_0408 hypothetical lipoprotein 468186:468725 reverse MW:19522	19510	0	0	0	3.09099e-05	0	0	0
SL1344_0409	nrdR	SL1344_0409 conserved hypothetical protein 468877:469326 forward MW:17198	17187	0	0	0	0	0	0	0
SL1344_0410	ribD	SL1344_0410 riboflavin biosynthesis protein RibD 469330:470433 forward MW:39730	39705	0	0	0	0	-10.5157	-7.50779	3.00791
SL1344_0411	ribH	SL1344_0411 6,7-dimethyl-8-ribityllumazine synthase (riboflavin synthase beta chain) 470522:470992 forward MW:16008	15998	0	0	0.0001464	1.82262e-05	-3.97758	-3.15317	0.824404
SL1344_0412	nusB	SL1344_0412 N utilization substance protein B 471013:471432 forward MW:15689	15679	0	7.74596e-06	0.000121252	6.85414e-05	3	-4.80735	-7.80735
SL1344_0413	thiL	SL1344_0413 thiamine-monophosphate kinase 471511:472488 forward MW:34986	34964	0	7.89216e-07	0	2.23916e-05	0	0	0
SL1344_0415	yajO	SL1344_0415 hypothetical oxidoreductase 473085:474059 reverse MW:36162	36139	0	0	0	0	-8.37938	-5.35755	3.02183
SL1344_0416	dxs	SL1344_0416 1-deoxyxylulose-5-phosphate synthase 474116:475978 reverse MW:67468	67425	0	0	3.33128e-05	4.14731e-06	0	-8.0607	-8.0607
SL1344_0417	ispA	SL1344_0417 geranyltranstransferase 476002:476901 reverse MW:31986	31966	0	0	0	2.66521e-05	0	0	0
SL1344_0419	thiI	SL1344_0419 thiamine biosynthesis protein ThiI 477354:478802 forward MW:54804	54770	0	0	0	0	0	0	0
SL1344_0427	thiJ	SL1344_0427 4-methyl-5(b-hydroxyethyl)-thiazole monophosphate biosynthesis (ThiJ) protein 485713:486303 reverse MW:20767	20754	0	0	0	0	0	0	0
SL1344_0428	apbA	SL1344_0428 2-dehydropantoate 2-reductase 486266:487177 reverse MW:33938	33916	0	0	0	0	0	0	0
SL1344_0429	yajQ	SL1344_0429 conserved hypothetical protein 487285:487794 forward MW:19021	19010	0	0	0	0	3	-3.49185	-6.49185
SL1344_0436	cyoB	SL1344_0436 cytochrome o ubiquinol oxidase subunit I 494675:496666 reverse MW:74282	74232	0	7.74621e-07	0	8.96875e-06	0	-5.24793	-5.24793
SL1344_0437	cyoA	SL1344_0437 cytochrome o ubiquinol oxidase subunit II 496677:497633 reverse MW:35293	35270	0	0	0	3.78616e-06	-5.3443	-4.92481	0.419483
SL1344_0439	yajG	SL1344_0439 hypothetical lipoprotein 499605:500237 reverse MW:22810	22796	0	7.60863e-07	3.25118e-05	2.42855e-05	0	0	0
SL1344_0440	bolA	SL1344_0440 BolA protein 500487:500804 forward MW:11938	11931	0	0	0	0	0	0	0
SL1344_0441	tig	SL1344_0441 trigger factor 501151:502449 forward MW:48067	48037	0	0	0	0	-8.71606	-9.16761	-0.451548
SL1344_0442	clpP	SL1344_0442 ATP-dependent clp protease proteolytic subunit 502696:503319 forward MW:23177	23162	0	5.29654e-06	0.00222878	0.00304793	4	4	0
SL1344_0443	clpX	SL1344_0443 ATP-dependent clp protease ATP-binding subunit ClpX 503571:504842 forward MW:46176	46147	0	1.61002e-06	0	0	-8.37069	-8.13955	0.231136
SL1344_0444	lon	SL1344_0444 Lon protease 505028:507382 forward MW:87412	87356	0	0	3.30852e-05	2.82444e-05	-12.4833	-12.1951	0.288247
SL1344_0445	hupB	SL1344_0445 DNA-binding protein HU-beta 507591:507863 forward MW:9239	9234	0	0	0.000572618	0.000468946	-3.89616	-8.67798	-4.78182
SL1344_0446	cypD	SL1344_0446 peptidyl-prolyl cis-trans isomerase D 508154:510025 forward MW:68129	68087	0	5.37842e-06	8.03898e-05	0.0022117	-12.1238	-12.6257	-0.501911
SL1344_0448	ybaW	SL1344_0448 conserved hypothetical protein 510653:511051 forward MW:15093	15084	0	0	0.00044631	0.000632039	0	0	0
SL1344_0449	ybaX	SL1344_0449 conserved hypothetical protein 511157:511852 reverse MW:25455	25439	0	0	0	0	0	0	0
SL1344_0453	ybaO	SL1344_0453 hypothetical transcriptional regulator 515754:516212 forward MW:17397	17386	0	0	0	0	0	0	0
SL1344_0455	mdlB	SL1344_0455 hypothetical ABC transporter ATP-binding membrane protein 518018:519799 forward MW:65229	65187	0	0	0	0	0	-5.39232	-5.39232
SL1344_0458	tesB	SL1344_0458 acyl-CoA thioesterase II 521768:522628 reverse MW:31990	31970	0	0	0	4.15603e-06	0	-5.35755	-5.35755
SL1344_0459	ybaY	SL1344_0459 conserved hypothetical lipoprotein 522843:523412 forward MW:19477	19465	0	0	0	4.07653e-06	4.08746	4.08746	0
SL1344_0462	rpmE2	SL1344_0462 hypothetical 50s ribosomal protein L31 (second copy) 525840:526100 forward MW:9815	9809	0	1.67964e-06	0	0	0	-9.71768	-9.71768
SL1344_0464	ylaC	SL1344_0464 hypothetical membrane protein 526302:526772 reverse MW:18316	18304	0	0	0	8.41759e-05	0	0	0
SL1344_0466	hha	SL1344_0466 haemolysin expression modulating protein 527619:527837 reverse MW:8614	8608	0	0	0	0	0	0	0
SL1344_0468	acrB	SL1344_0468 acriflavin resistance protein B 528735:531884 reverse MW:113611	113537	0	0	0	0	-9.44708	-8.81057	0.636512
SL1344_0469	acrA	SL1344_0469 acriflavin resistance protein A precursor 531907:533100 reverse MW:42235	42209	0	0	6.9772e-05	4.48794e-05	-5.81592	-5.98005	-0.164136
SL1344_0470	acrR	SL1344_0470 potential acrAB operon repressor 533242:533895 forward MW:24903	24887	0	3.3387e-06	0.000185894	0.000208288	0	0	0
SL1344_0471	aefA	SL1344_0471 integral membrane protein AefA 534014:537376 forward MW:126749	126668	0	0	0	0	0	0	0
SL1344_0472	0	SL1344_0472 conserved hypothetical protein 537418:538353 reverse MW:35258	35235	0	0	0	0	0	0	0
SL1344_0474	priC	SL1344_0474 primosomal replication protein N 538604:539119 reverse MW:19874	19862	0	0	0	0	0	0	0
SL1344_0476	apt	SL1344_0476 adenine phosphoribosyltransferase 539730:540281 forward MW:19985	19973	0	0	0	0	0	0	0
SL1344_0477	dnaX	SL1344_0477 DNA polymerase III subunits gamma and tau 540395:542323 forward MW:70596	70552	0	0	0	0	0	-5.16993	-5.16993
SL1344_0478	ybaB	SL1344_0478 conserved hypothetical protein 542369:542698 forward MW:12015	12007	0	0	0	3.59847e-06	-8.37504	-5.35755	3.01749
SL1344_0479	recR	SL1344_0479 recombination protein RecR 542698:543303 forward MW:21715	21701	0	0	3.3204e-05	4.13377e-06	0	0	0
SL1344_0480	htpG	SL1344_0480 heat shock protein HtpG 543414:545288 forward MW:71487	71442	0	0	0	0	-6.5835	-6.87048	-0.286982
SL1344_0481	adk	SL1344_0481 adenylate kinase 545529:546173 forward MW:23488	23473	0	1.02746e-05	0.000987824	0.00120521	-4.63137	-2.03291	2.59846
SL1344_0482	hemH	SL1344_0482 ferrochelatase 546402:547364 forward MW:35914	35891	0	6.4703e-06	0.000161078	2.66383e-05	0	0	0
SL1344_0484	gsk	SL1344_0484 inosine-guanosine kinase 548485:549789 forward MW:48395	48364	0	0	0	0	0	0	0
SL1344_0485	ybaL	SL1344_0485 hypothetical transport protein 549838:551514 reverse MW:59257	59218	0	0	0	0	0	0	0
SL1344_0487	ushA	SL1344_0487 UDP-sugar hydrolase 553122:554774 forward MW:60439	60401	0	0	0	0	0	-5.2854	-5.2854
SL1344_0488	ybaK	SL1344_0488 conserved hypothetical protein 554891:555370 reverse MW:17054	17043	0	0	0	3.8509e-06	0	0	0
SL1344_0491	copA	SL1344_0491 copper-transporting ATPase 557433:559934 reverse MW:87911	87855	0	0	0	0	-8.49185	-6.94251	1.54934
SL1344_0492	cueR	SL1344_0492 copper efflux regulator 560044:560460 forward MW:15647	15638	0	0	3.59931e-05	1.23227e-05	0	0	0
SL1344_0493	ybbJ	SL1344_0493 hypothetical membrane protein 560461:560913 reverse MW:16774	16763	0	0	0	0	0	0	0
SL1344_0494	ybbK	SL1344_0494 hypothetical membrane protein 560910:561827 reverse MW:33660	33639	0	0	0	0	0	-7.52356	-7.52356
SL1344_0495	ybbL	SL1344_0495 hypothetical ABC transporter ATP-binding protein 561974:562651 forward MW:25492	25476	0	0	0	1.84442e-05	0	0	0
SL1344_0497	ybbN	SL1344_0497 thioredoxin-like protein 563503:564357 reverse MW:31814	31794	0	0	0	0	0	0	0
SL1344_0498	ybbO	SL1344_0498 hypothetical oxidoreductase 564417:565187 reverse MW:28139	28122	0	0	0	0	0	-5.2854	-5.2854
SL1344_0499	tesA	SL1344_0499 acyl-coA thioesterase I 565342:565956 reverse MW:23051	23037	0	0	0	3.94445e-06	0	0	0
SL1344_0500	ybbA	SL1344_0500 hypothetical ABC transporter ATP-binding protein 565927:566613 forward MW:24485	24470	0	0	0	0	0	0	0
SL1344_0501	ybbP	SL1344_0501 hypothetical membrane protein 566610:569024 forward MW:88774	88716	0	0	0	0	0	0	0
SL1344_0502	0	SL1344_0502 outer membrane protein 569210:570343 forward MW:42370	42343	0	0	0	0	0	0	0
SL1344_0503	sfbA	SL1344_0503 lipoprotein 570600:571430 forward MW:29848	29830	0	0	0	0	0	0	0
SL1344_0506	ybbB	SL1344_0506 hypothetical ATP-binding protein 573174:574268 reverse MW:41328	41302	0	0	0	0	-8.40088	-5.39232	3.00856
SL1344_0508	allA	SL1344_0508 ureidoglycolate hydrolase 575491:575973 forward MW:18138	18127	0	0	3.38418e-05	4.21317e-06	0	0	0
SL1344_0509	allR	SL1344_0509 negative regulator of allantoin and glyoxylate utilization operons 576052:576870 forward MW:29219	29201	0	0	0	0	0	-6.42626	-6.42626
SL1344_0518	glxK	SL1344_0518 glycerate kinase 586187:587335 forward MW:39021	38996	0	0	0	8.56394e-06	0	0	0
SL1344_0519	ylbA	SL1344_0519 conserved hypothetical protein 587415:588200 reverse MW:28915	28896	0	0	0	0	0	0	0
SL1344_0520	allC	SL1344_0520 allantoate amidohydrolase 588211:589446 reverse MW:45397	45368	0	0	0	0	0	0	0
SL1344_0521	allD	SL1344_0521 ureidoglycolate dehydrogenase 589468:590517 reverse MW:38043	38019	0	0	0	0	0	0	0
SL1344_0526	purK	SL1344_0526 phosphoribosylaminoimidazole carboxylase ATPase subunit 595540:596607 reverse MW:39142	39117	0	0	0	0	0	-6.40939	-6.40939
SL1344_0527	purE	SL1344_0527 phosphoribosylaminoimidazole carboxylase catalytic subunit 596604:597113 reverse MW:17794	17783	0	0	0	8.47935e-06	-9.50978	0	9.50978
SL1344_0529	ppiB	SL1344_0529 peptidyl-prolyl cis-trans isomerase B 597956:598450 reverse MW:18140	18129	0	0	7.28547e-05	0	-5.88142	-0.0703893	5.81103
SL1344_0530	cysS	SL1344_0530 cysteinyl-tRNA synthetase 598623:600008 forward MW:52257	52224	0	3.99779e-06	0.000235814	4.16097e-06	-8.32643	-9.22641	-0.899983
SL1344_0534	ybcJ	SL1344_0534 conserved hypothetical protein 601976:602188 reverse MW:7395	7391	0	0	3.20933e-05	5.99323e-05	0	0	0
SL1344_0535	folD	SL1344_0535 FolD bifunctional protein [includes: methylenetetrahydrofolate dehydrogenase; methenyltetrahydrofolate cyclohydrolase 602190:603056 reverse MW:30874	30854	0	0	0	0	0	-7.06609	-7.06609
SL1344_0536	fimA	SL1344_0536 type-1 fimbrial protein, a chain precursor 603618:604160 forward MW:18231	18220	0	0	0	1.33764e-05	0	0	0
SL1344_0537	fimI	SL1344_0537 major pilin protein 604236:604769 forward MW:19098	19086	0	0	0	0	0	0	0
SL1344_0538	fimC	SL1344_0538 fimbrial chaperone protein 604813:605505 forward MW:24868	24852	0	0	0	0	0	0	0
SL1344_0539	fimD	SL1344_0539 outer membrane usher protein FimD precursor 605536:608148 forward MW:95128	95069	0	0	0	0	0	0	0
SL1344_0540	fimH	SL1344_0540 FimH protein precursor 608163:609170 forward MW:36102	36079	0	0	0	0	0	0	0
SL1344_0542	fimZ	SL1344_0542 probable transcriptional regulator (FimXZ protein) 609744:610376 reverse MW:23546	23532	0	0	0	0	0	0	0
SL1344_0545	fimW	SL1344_0545 fimbriae w protein 612194:612790 reverse MW:23436	23421	0	0	0	0	0	0	0
SL1344_0547	0	SL1344_0547 hypothetical membrane protein 614292:615944 reverse MW:61931	61891	0	0	0	0	0	0	0
SL1344_0548	gtrB	SL1344_0548 bactoprenol glucosyl transferase 615925:616851 reverse MW:34839	34817	0	0	0	0	0	0	0
SL1344_0551	ykgD	SL1344_0551 hypothetical araC-family transcriptional regulator 618746:619600 reverse MW:31125	31105	0	0	0	0	0	0	0
SL1344_0552	ykgC	SL1344_0552 probable pyridine nucleotide-disulfide oxidoreductase 619816:621141 forward MW:47618	47588	0	0	0	0	0	0	0
SL1344_0555	0	SL1344_0555 conserved hypothetical protein 622186:623361 reverse MW:45484	45456	0	0	0	0	0	0	0
SL1344_0556	pheP	SL1344_0556 phenylalanine-specific permease 623687:625081 forward MW:51017	50983	0	0	0	0	0	0	0
SL1344_0557	ybdG	SL1344_0557 hypothetical membrane protein 625123:626253 reverse MW:42307	42280	0	0	0	0	0	0	0
SL1344_0558	apeE	SL1344_0558 outer membrane esterase 626681:628651 forward MW:69862	69819	0	0	0	0	0	-5.16993	-5.16993
SL1344_0566	nfnB	SL1344_0566 oxygen-insensitive NAD(P)H nitroreductase 636516:637169 reverse MW:23955	23940	0	0	0	3.56108e-06	0	0	0
SL1344_0568	ramR	SL1344_0568 Regulation of MDR efflux 637634:638215 reverse MW:21917	21903	0	0	0	0	0	0	0
SL1344_0573	fepA	SL1344_0573 ferrienterobactin receptor precursor 641046:643301 reverse MW:82997	82946	0	0	0	0	0	-14.0681	-14.0681
SL1344_0574	fes	SL1344_0574 enterochelin esterase 643490:644704 forward MW:45617	45588	0	0	0	0.00171763	0	-6.33985	-6.33985
SL1344_0576	entF	SL1344_0576 enterobactin synthetase component F 644950:648834 forward MW:141733	141642	0	0	0	8.13817e-06	0	-9.92926	-9.92926
SL1344_0577	fepE	SL1344_0577 responsible for the production of very long (VL) modal length LPS Oag 649084:650220 forward MW:42295	42268	0	0	0	9.7529e-05	0	-7.01123	-7.01123
SL1344_0582	fepB	SL1344_0582 ferrienterobactin-binding periplasmic protein precursor 654478:655434 reverse MW:34297	34276	0	0	0	1.29351e-05	0	-6.37504	-6.37504
SL1344_0583	entC	SL1344_0583 isochorismate synthase EntC 655743:656918 forward MW:42836	42809	0	0	0	8.30408e-06	0	-10.3185	-10.3185
SL1344_0584	entE	SL1344_0584 2,3-dihydroxybenzoate-AMP ligase 656928:658538 forward MW:59256	59218	0	0	0	0.000127732	0	-8.58871	-8.58871
SL1344_0585	entB	SL1344_0585 isochorismatase 658552:659409 forward MW:32234	32213	0	0	0	3.85099e-05	0	-9.93369	-9.93369
SL1344_0587	ybdB	SL1344_0587 conserved hypothetical protein 660167:660580 forward MW:14939	14929	0	0	0	9.77589e-05	0	-6.50779	-6.50779
SL1344_0588	cstA	SL1344_0588 carbon starvation protein A 660762:662867 forward MW:75039	74989	0	0	0	9.13734e-06	0	-6.42626	-6.42626
SL1344_0590	ybdH	SL1344_0590 hypothetical oxidoreductase 663164:664252 reverse MW:39580	39556	0	0	0	8.60574e-06	0	-7.50779	-7.50779
SL1344_0591	ybdL	SL1344_0591 hypothetical aminotransferase 664379:665539 forward MW:42680	42653	0	0	0	1.81578e-05	0	-6.35755	-6.35755
SL1344_0592	ybdM	SL1344_0592 conserved hypothetical protein 665540:666157 reverse MW:23806	23791	0	0	0	8.1581e-06	0	0	0
SL1344_0594	ybdO	SL1344_0594 hypothetical lysR-family transcriptional regulator 667531:668433 reverse MW:34388	34366	0	0	0	0	0	0	0
SL1344_0595	dsbG	SL1344_0595 thiol:disulfide interchange protein DsbG precursor 668750:669496 reverse MW:27434	27416	0	0	0	0	0	0	0
SL1344_0596	ahpC	SL1344_0596 alkyl hydroperoxide reductase c22 protein 669937:670500 forward MW:20747	20734	0	0	0	0	-5.40876	-0.567041	4.84172
SL1344_0597	ahpF	SL1344_0597 alkyl hydroperoxide reductase F52A protein (subunit F) 670742:672307 forward MW:55950	55915	0	2.68371e-06	0.000114675	3.96572e-06	0	-8.11894	-8.11894
SL1344_0602	ybdQ	SL1344_0602 conserved hypothetical protein 676860:677288 reverse MW:15901	15891	0	0	0	2.78062e-05	-4.8413	-5.6112	-0.769898
SL1344_0604	rnk	SL1344_0604 regulator of nucleoside diphosphate kinase 678832:679242 reverse MW:14994	14984	0	4.18989e-06	0.000120441	0.000205262	0	-6.52356	-6.52356
SL1344_0605	rna	SL1344_0605 ribonuclease I precursor 679477:680283 reverse MW:29527	29509	0	0	0	9.17101e-06	0	0	0
SL1344_0611	citD	SL1344_0611 citrate lyase acyl carrier protein 685761:686057 reverse MW:10777	10771	0	0	0	0	0	-5.42626	-5.42626
SL1344_0615	dcuC	SL1344_0615 C4-dicarboxylate anaerobic carrier 689879:691132 reverse MW:43672	43643	0	0	0	4.25761e-06	0	0	0
SL1344_0616	pagP	SL1344_0616 antimicrobial peptide resistance and lipid A acylation protein 691643:692215 forward MW:22199	22185	0	0	0	0	2.80735	2.80735	0
SL1344_0617	cspE	SL1344_0617 cold shock-like protein cspE 692400:692612 forward MW:7582	7578	0	7.44467e-07	0	0	0	-9.01402	-9.01402
SL1344_0619	ybeM	SL1344_0619 possible hydrolase 693144:693932 forward MW:28372	28354	0	0	0	5.16959e-05	0	0	0
SL1344_0621	lipA	SL1344_0621 lipoic acid synthetase 694350:695315 reverse MW:36042	36018	0	0	0	0	0	-5.35755	-5.35755
SL1344_0622	ybeF	SL1344_0622 lysR-family transcriptional regulator 695521:696474 reverse MW:36178	36156	0	0	0	4.13343e-06	0	0	0
SL1344_0623	lipB	SL1344_0623 lipoate-protein ligase B (lipoate biosynthesis protein B) 696776:697417 reverse MW:23837	23822	0	0	0	0	0	0	0
SL1344_0624	ybeD	SL1344_0624 conserved hypothetical protein 697517:697711 reverse MW:7130	7126	0	0	0	0	0	-6.74147	-6.74147
SL1344_0625	dacA	SL1344_0625 D-alanine carboxypeptidase 697889:699100 reverse MW:44457	44429	0	0	0	1.0722e-05	-8.31741	-9.31061	-0.9932
SL1344_0626	rlpA	SL1344_0626 rare lipoprotein A precursor 699240:700307 reverse MW:36881	36859	0	0	3.18535e-05	6.34501e-05	-5.40939	-3.40939	2
SL1344_0627	mrdB	SL1344_0627 rod shape-determining protein RodA 700318:701430 reverse MW:40532	40505	0	7.95141e-07	3.39765e-05	8.45988e-06	0	0	0
SL1344_0628	mrdA	SL1344_0628 penicillin-binding protein 2 701433:703334 reverse MW:71034	70990	0	0	0	0	0	-6.33985	-6.33985
SL1344_0629	ybeA	SL1344_0629 conserved hypothetical protein 703365:703832 reverse MW:17399	17388	0	0	0	8.14681e-06	0	0	0
SL1344_0630	ybeB	SL1344_0630 conserved hypothetical protein 703836:704153 reverse MW:11542	11535	0	0	0	0	0	-6.58496	-6.58496
SL1344_0632	cobD	SL1344_0632 hypothetical aminotransferase CobD 705187:706281 forward MW:40766	40740	0	0	0	9.56046e-06	0	0	0
SL1344_0634	holA	SL1344_0634 DNA polymerase III, delta subunit 706899:707930 reverse MW:38601	38576	0	0	0	0	0	0	0
SL1344_0635	rlpB	SL1344_0635 rare lipoprotein B precursor 707930:708520 reverse MW:21457	21444	0	0	0	0	-5.45738	-1.35755	4.09983
SL1344_0636	leuS	SL1344_0636 leucyl-tRNA synthetase 708535:711117 reverse MW:96986	96923	0	1.6448e-06	7.02827e-05	4.10152e-06	-8.21917	-10.5459	-2.32676
SL1344_0637	0	SL1344_0637 hypothetical hydrolase N-terminus 711405:711695 forward MW:10653	10646	0	0	2.97811e-05	0.000149541	0	0	0
SL1344_0638	0	SL1344_0638 hypothetical hydrolase C-terminus 711712:712884 forward MW:41195	41169	0	0	0	0	0	0	0
SL1344_0641	ybeL	SL1344_0641 conserved hypothetical protein 715976:716449 forward MW:18410	18399	0	0	0	0	0	0	0
SL1344_0648	hscC	SL1344_0648 chaperone heat shock protein 721944:723623 reverse MW:62157	62118	0	0	0	0	0	0	0
SL1344_0650	rihA	SL1344_0650 probable nucleoside hydrolase 724969:725904 reverse MW:33789	33768	0	0	0	0	0	-7.05528	-7.05528
SL1344_0651	gltL	SL1344_0651 glutamate/aspartate transport ATP-binding protein GltL 726021:726746 reverse MW:26606	26589	0	0	0	1.3348e-05	0	0	0
SL1344_0652	gltK	SL1344_0652 glutamate/aspartate transport system permease protein GltK 726746:727420 reverse MW:24777	24761	0	0	0	0	0	0	0
SL1344_0653	gltJ	SL1344_0653 glutamate/aspartate transport system permease protein GltJ 727420:728160 reverse MW:27362	27344	0	0	0	0	0	0	0
SL1344_0654	gltI	SL1344_0654 ABC transporter periplasmic binding protein (glutamate/aspartate?) 728320:729246 reverse MW:34088	34067	0	0	0	0	0	-9.48583	-9.48583
SL1344_0655	lnt	SL1344_0655 apolipoprotein N-acyltransferase 729583:731121 reverse MW:57598	57561	0	0	0	7.16747e-05	0	-5.20945	-5.20945
SL1344_0656	ybeX	SL1344_0656 haemolysin-related protein 731141:732019 reverse MW:33299	33279	0	0	0	3.66983e-06	0	-5.24793	-5.24793
SL1344_0657	ybeY	SL1344_0657 conserved hypothetical protein 732177:732650 reverse MW:17784	17773	0	0	0	3.8191e-06	0	0	0
SL1344_0658	phoL	SL1344_0658 PhoH-like ATP-binding protein 732647:733732 reverse MW:40957	40932	0	0	0	0	0	-7.87652	-7.87652
SL1344_0659	miaB	SL1344_0659 MiaB protein (hypothetical tRNA-thiotransferase (or tRNA-methylthiotransferase)) 733898:735322 reverse MW:53716	53682	0	0	0	2.34868e-05	-10.0293	-8.13443	1.89486
SL1344_0660	ubiF	SL1344_0660 hypothetical monooxygenase 735466:736641 forward MW:42497	42470	0	0	0.000104466	2.80647e-05	0	0	0
SL1344_0662	asnB	SL1344_0662 asparagine synthetase B 738350:740014 reverse MW:62573	62533	0	0	0	0	-5.41504	-4.17526	1.23978
SL1344_0663	nagD	SL1344_0663 NagD protein 740304:741056 reverse MW:27119	27102	0	1.49888e-06	6.40474e-05	2.71104e-05	0	0	0
SL1344_0664	nagC	SL1344_0664 N-acetylglucosamine repressor 741103:742323 reverse MW:44441	44414	0	0	0	0	0	0	0
SL1344_0665	nagA	SL1344_0665 N-acetylglucosamine-6-phosphate deacetylase 742328:743482 reverse MW:41110	41084	0	0	0	0	-8.3966	-6.39232	2.00429
SL1344_0666	nagB	SL1344_0666 glucosamine-6-phosphate deaminase 743542:744342 reverse MW:29632	29613	0	0	3.36632e-05	8.38187e-06	-6.44708	-3.44294	3.00414
SL1344_0667	nagE	SL1344_0667 pts system, N-acetylglucosamine-specific IIABC component 744669:746621 forward MW:68490	68446	0	7.80788e-07	6.97594e-05	8.68477e-06	0	-7.45121	-7.45121
SL1344_0668	glnS	SL1344_0668 glutaminyl-tRNA synthetase 746832:748499 forward MW:63539	63499	0	0	0	1.74553e-05	-8.3443	-8.33985	0.00444591
SL1344_0669	ybfM	SL1344_0669 hypothetical outer membrane protein 748945:750351 forward MW:52664	52631	0	0	3.25184e-05	3.23873e-05	0	0	0
SL1344_0670	ybfN	SL1344_0670 hypothetical lipoprotein 750401:750733 forward MW:12236	12229	0	0	0	0	0	-6.56986	-6.56986
SL1344_0675	fur	SL1344_0675 ferric uptake regulation protein 755805:756257 reverse MW:17011	17000	0	0	0	9.51193e-06	0	-7.19967	-7.19967
SL1344_0676	fldA	SL1344_0676 flavodoxin 1 756539:757069 reverse MW:19636	19624	0	0	0	1.47403e-05	-5.33092	-2.32193	3.00899
SL1344_0677	ybfE	SL1344_0677 conserved hypothetical protein 757232:757513 reverse MW:10845	10839	0	7.52603e-07	3.21588e-05	4.00364e-06	0	0	0
SL1344_0678	ybfF	SL1344_0678 hypothetical esterase/lipase YbfF 757647:758417 reverse MW:28737	28719	0	0	0	0	0	0	0
SL1344_0679	seqA	SL1344_0679 seqA protein 758602:759144 forward MW:20149	20136	0	0	0	0	0	0	0
SL1344_0680	pgm	SL1344_0680 phosphoglucomutase 759169:760809 forward MW:58090	58053	0	0	0	0	-6.51096	-5.88753	0.623437
SL1344_0681	0	SL1344_0681 possible 5-nitroimidazole antibiotic resistance 760924:761409 reverse MW:18519	18507	0	1.53065e-06	0.000136756	8.88288e-05	0	0	0
SL1344_0682	potE	SL1344_0682 putrescine-ornithine antiporter 761474:762793 reverse MW:46475	46444	0	0	0	0	0	0	0
SL1344_0683	speF	SL1344_0683 ornithine decarboxylase, inducible (ec 4.1.1.17) 762790:764988 reverse MW:82450	82397	0	0	0	0	0	-8.29921	-8.29921
SL1344_0684	kdpE	SL1344_0684 KDP operon transcriptional regulatory protein 765750:766427 reverse MW:25330	25314	0	0	0	3.15196e-05	0	0	0
SL1344_0687	kdpB	SL1344_0687 potassium-transporting ATPase B chain 769698:771746 reverse MW:72113	72068	0	0	0	0	0	-7.01123	-7.01123
SL1344_0689	ybfA	SL1344_0689 hypothetical exported protein 773872:774078 forward MW:8129	8124	0	0	0	1.28653e-05	0	0	0
SL1344_0692	ybgI	SL1344_0692 conserved hypothetical protein 777459:778202 forward MW:26945	26929	0	0	0	0	0	0	0
SL1344_0693	ybgJ	SL1344_0693 conserved hypothetical protein 778218:778874 forward MW:24088	24073	0	0	0	0	0	0	0
SL1344_0694	ybgK	SL1344_0694 conserved hypothetical protein 778868:779800 forward MW:34459	34438	0	0	0	0	0	0	0
SL1344_0710	nei	SL1344_0710 endonuclease VIII, DNA N-glycosylase with an AP lyase activity 793336:794127 forward MW:29863	29845	0	0	0	0	0	0	0
SL1344_0712	gltA	SL1344_0712 citrate synthase 795365:796648 reverse MW:48076	48045	0	0	0	0	-5.89381	-5.18982	0.703983
SL1344_0714	sdhC	SL1344_0714 succinate dehydrogenase cytochrome b-556 subunit 797403:797792 forward MW:14330	14321	0	2.41839e-06	0.000142705	8.76057e-05	0	0	0
SL1344_0715	sdhD	SL1344_0715 succinate dehydrogenase hydrophobic membrane anchor protein 797786:798133 forward MW:12795	12787	0	0	0	0	0	0	0
SL1344_0716	sdhA	SL1344_0716 succinate dehydrogenase flavoprotein subunit 798133:799899 forward MW:64462	64421	0	0	0	0	-6.54638	-4.54946	1.99692
SL1344_0717	sdhB	SL1344_0717 succinate dehydrogenase iron-sulfur protein 799913:800632 forward MW:26864	26846	0	6.02213e-06	0.00056084	0.000140466	-5.36632	-2.35755	3.00877
SL1344_0718	sucA	SL1344_0718 2-oxoglutarate dehydrogenase E1 component 801156:803957 forward MW:104824	104758	0	7.72181e-07	3.29954e-05	4.1078e-06	-7.20482	-6.21868	0.986131
SL1344_0719	sucB	SL1344_0719 dihydrolipoamide succinyltransferase component (E2) 803972:805180 forward MW:43857	43830	0	4.01759e-06	0.000590123	0.000297879	-6.84401	-6.61687	0.22714
SL1344_0720	sucC	SL1344_0720 succinyl-CoA synthetase beta chain 805322:806488 forward MW:41497	41471	0	3.36186e-06	0.000390556	0.000333652	-5.94911	-5.39606	0.553051
SL1344_0721	sucD	SL1344_0721 succinyl-CoA synthetase alpha chain 806488:807357 forward MW:29775	29757	0	5.46721e-06	0.000339803	0.000231615	-3.21809	-5.23415	-2.01606
SL1344_0722	cydA	SL1344_0722 cytochrome d ubiquinol oxidase subunit I 808940:810508 forward MW:58315	58277	0	3.5663e-06	3.35254e-05	0.000135458	0	-9.35315	-9.35315
SL1344_0723	cydB	SL1344_0723 cytochrome d ubiquinol oxidase subunit II 810524:811663 forward MW:42365	42337	0	0	0	6.53925e-05	0	-5.24793	-5.24793
SL1344_0726	ybgC	SL1344_0726 conserved hypothetical protein 812438:812842 forward MW:15691	15681	0	0	0	3.77891e-06	0	0	0
SL1344_0727	tolQ	SL1344_0727 TolQ protein 812839:813531 forward MW:25572	25555	0	0	0	0	0	0	0
SL1344_0728	tolR	SL1344_0728 tolR protein 813535:813963 forward MW:15477	15467	0	0	0	0	0	0	0
SL1344_0729	tolA	SL1344_0729 tolA protein 814028:815251 forward MW:41865	41840	0	0	0	0	0	-7	-7
SL1344_0730	tolB	SL1344_0730 tolB protein precursor 815375:816667 forward MW:46149	46120	0	0	0	1.28042e-05	-7.02098	-7.91364	-0.892657
SL1344_0731	pal	SL1344_0731 peptidoglycan-associated lipoprotein precursor 816702:817226 forward MW:18865	18853	0	7.7383e-07	0.000103921	0.000192891	-1.84976	0.0320612	1.88182
SL1344_0732	ybgF	SL1344_0732 hypothetical exported protein 817236:818024 forward MW:28247	28230	0	9.08311e-06	3.28263e-05	8.89468e-06	0	-5.32193	-5.32193
SL1344_0735	ybgR	SL1344_0735 probable cation transport protein 821273:822211 reverse MW:34461	34439	0	0	0	3.9596e-06	0	0	0
SL1344_0737	aroG	SL1344_0737 phospho-2-dehydro-3-deoxyheptonate aldolase (DAHP synthetase) phenylalanine repressible 823028:824080 forward MW:37856	37832	0	0	0	0	0	-8.49985	-8.49985
SL1344_0738	0	SL1344_0738 hypothetical hydro-lyase 824174:824719 reverse MW:19719	19707	0	0	0	3.618e-05	0	0	0
SL1344_0739	0	SL1344_0739 hypothetical hydro-lyase 824734:825579 reverse MW:30831	30811	0	0	0	0	0	0	0
SL1344_0749	gpmA	SL1344_0749 phosphoglycerate mutase 1 835617:836369 reverse MW:28493	28476	0	0	0	0	-4.16859	-5.62595	-1.45736
SL1344_0750	galM	SL1344_0750 aldose 1-epimerase (mutarotase) 836593:837633 reverse MW:38547	38523	0	6.00648e-06	0.000107913	0.00029629	-8.30378	-6.39232	1.91146
SL1344_0751	galK	SL1344_0751 galactokinase 837627:838775 reverse MW:41302	41276	0	0	3.15648e-05	8.35059e-06	-5.40088	-4.48382	0.917064
SL1344_0752	galT	SL1344_0752 galactose-1-phosphate uridylyltransferase 838778:839824 reverse MW:39674	39649	0	7.91491e-07	3.38205e-05	1.78947e-05	0	-5.32193	-5.32193
SL1344_0753	galE	SL1344_0753 UDP-glucose 4-epimerase 839835:840851 reverse MW:37134	37111	0	0	0	4.04455e-06	0	-7.53138	-7.53138
SL1344_0755	modF	SL1344_0755 hypothetical molybdenum transport ATP-binding protein ModF (photorepair protein PhrA) 842153:843628 reverse MW:54697	54663	0	0	0	1.84551e-05	0	0	0
SL1344_0756	modE	SL1344_0756 hypothetical molybdenum transport protein ModE 843696:844484 reverse MW:28346	28329	0	0	0	0	0	-5.32193	-5.32193
SL1344_0758	modA	SL1344_0758 molybdate-binding periplasmic protein precursor 844929:845702 forward MW:27548	27531	0	0	0	3.97349e-06	0	0	0
SL1344_0759	modB	SL1344_0759 molybdenum transport system permease protein ModB 845702:846391 forward MW:25043	25027	0	0	0	0	0	0	0
SL1344_0760	modC	SL1344_0760 molybdenum transport ATP-binding protein ModC 846394:847452 forward MW:39055	39031	0	0	0	0	0	0	0
SL1344_0761	ybhA	SL1344_0761 conserved hypothetical protein 847453:848271 reverse MW:30119	30100	0	0	0	0	0	-5.39232	-5.39232
SL1344_0762	ybhE	SL1344_0762 conserved hypothetical protein 848435:849430 forward MW:36369	36346	0	0	0	4.22189e-06	0	-7.02237	-7.02237
SL1344_0763	ybhC	SL1344_0763 possible pectinesterase precursor 849574:850857 reverse MW:45907	45879	0	0	0	1.29767e-05	-6.9331	-5.1964	1.7367
SL1344_0765	hutG	SL1344_0765 formiminoglutamase 852315:853256 forward MW:34357	34335	0	1.53957e-06	0.000183261	5.49908e-05	0	-5.2854	-5.2854
SL1344_0766	hutC	SL1344_0766 histidine utilization repressor 853349:854026 forward MW:25574	25558	0	0	0	3.94028e-06	0	0	0
SL1344_0767	hutU	SL1344_0767 urocanate hydratase 854223:855908 forward MW:61466	61427	0	0	0	0	-8.29921	-7.42626	0.872943
SL1344_0768	hutH	SL1344_0768 histidine ammonia-lyase 855910:857430 forward MW:53841	53807	0	0	3.14573e-05	1.72318e-05	0	-7.02237	-7.02237
SL1344_0769	ybhB	SL1344_0769 conserved hypothetical protein 857515:857991 reverse MW:17072	17061	0	0	0	1.30359e-05	-6.48382	-2.35755	4.12626
SL1344_0774	bioD	SL1344_0774 dethiobiotin synthetase 862351:863037 forward MW:24199	24184	0	7.76992e-07	7.16442e-05	4.13339e-06	-8.33092	0	8.33092
SL1344_0775	uvrB	SL1344_0775 excision nuclease ABC subunit B 863688:865709 forward MW:76135	76087	0	0	3.22006e-05	0	0	-5.2854	-5.2854
SL1344_0776	slrP	SL1344_0776 Type III secretion system effector protein, leucine rich repeat-Acts as a ubiquitin ligase for thioredoxin. Also targets the ERdj3 chaperone of mammalian cells 866199:868496 forward MW:86873	86818	0	0	0	3.88078e-06	0	0	0
SL1344_0777	ybhK	SL1344_0777 conserved hypothetical protein 868588:869496 reverse MW:32627	32606	0	0	0	0	0	0	0
SL1344_0779	moaB	SL1344_0779 molybdenum cofactor biosynthesis protein B 870904:871416 forward MW:18540	18528	0	0	0	0	-5.33539	3	8.33539
SL1344_0780	moaC	SL1344_0780 molybdenum cofactor biosynthesis protein C 871419:871904 forward MW:17443	17432	0	7.5498e-07	3.22604e-05	0	0	0	0
SL1344_0781	moaD	SL1344_0781 molybdopterin converting factor, subunit 1 871891:872142 forward MW:9059	9054	0	0	0	0	0	0	0
SL1344_0782	moaE	SL1344_0782 molybdopterin converting factor, subunit 2 872144:872596 forward MW:16892	16882	0	0	0	0	0	0	0
SL1344_0786	0	SL1344_0786 hypothetical inner membrane protein 874842:875402 forward MW:21250	21236	0	0	0	0	0	0	0
SL1344_0788	ybhO	SL1344_0788 hypothetical phospholipase 876367:877608 reverse MW:47360	47331	0	0	0	0	0	0	0
SL1344_0793	ybhF	SL1344_0793 hypothetical ABC transporter ATP-binding protein 881213:882949 reverse MW:63132	63091	0	0	0	0	0	0	0
SL1344_0794	0	SL1344_0794 HlyD-family secretion protein 882942:883937 reverse MW:36311	36289	0	0	0	0	0	-5.39232	-5.39232
SL1344_0795	ybiH	SL1344_0795 hypothetical tetR-family transcriptional regulator 883937:884611 reverse MW:25081	25065	0	0	0	4.16453e-06	0	0	0
SL1344_0796	rhlE	SL1344_0796 hypothetical ATP-dependent RNA helicase rhlE 884841:886205 forward MW:50052	50021	0	0	0	0	0	0	0
SL1344_0797	dinG	SL1344_0797 probable ATP-dependent helicase DinG 886512:888557 forward MW:77273	77223	0	0	0	0	0	0	0
SL1344_0798	ybiB	SL1344_0798 hypothetical glycosyltransferase 888587:889561 forward MW:35654	35631	0	0	0	0	0	0	0
SL1344_0803	glnQ	SL1344_0803 glutamine transport ATP-binding protein GlnQ 894003:894725 reverse MW:26702	26685	0	0	0	0	0	0	0
SL1344_0804	glnP	SL1344_0804 glutamine transport system permease protein GlnP 894722:895381 reverse MW:24314	24299	0	0	0	0	0	0	0
SL1344_0805	glnH	SL1344_0805 glutamine-binding periplasmic protein precursor 895525:896271 reverse MW:27262	27245	0	0	0	0	0	-7.60733	-7.60733
SL1344_0806	dps	SL1344_0806 DNA protection during starvation protein 896748:897251 reverse MW:18717	18706	0	0	0	1.94546e-05	-3.99586	-0.305755	3.6901
SL1344_0808	ompX	SL1344_0808 outer membrane protein x precursor 898795:899310 forward MW:18494	18483	0	3.05342e-05	0.000486639	3.76865e-05	-4.24345	-4.83438	-0.590924
SL1344_0810	0	SL1344_0810 transcriptional regulator (iron dependant repressor family) 901532:902005 forward MW:17727	17716	0	1.6835e-06	3.21821e-05	4.85498e-05	0	0	0
SL1344_0812	ybiS	SL1344_0812 hypothetical exported protein 903158:904078 reverse MW:33292	33271	0	0	0	0	-6.60627	-5.11151	1.49476
SL1344_0813	ybiT	SL1344_0813 ABC transporter ATP-binding protein 904297:905889 forward MW:59789	59751	0	7.17739e-07	6.81535e-05	2.41818e-05	0	-8.35755	-8.35755
SL1344_0817	ybiU	SL1344_0817 conserved hypothetical protein 908194:909459 reverse MW:47235	47206	0	0	0	3.27613e-05	0	-7.45121	-7.45121
SL1344_0818	ybiV(1)	SL1344_0818 conserved hypothetical protein 909721:910530 forward MW:30358	30339	0	0	0	1.74559e-05	0	0	0
SL1344_0819	pflF	SL1344_0819 hypothetical formate acetyltransferase 3 910608:913040 reverse MW:90174	90117	0	0	0	0	0	-10.4998	-10.4998
SL1344_0821	moeB	SL1344_0821 molybdopterin biosynthesis MoeB protein 914223:914972 reverse MW:26903	26885	0	0	0	0.000144786	0	0	0
SL1344_0822	moeA	SL1344_0822 molybdopterin biosynthesis MoeA protein 914972:916213 reverse MW:44343	44315	0	0	0	0	-8.31288	-7.02237	1.29052
SL1344_0823	ybiK	SL1344_0823 hypothetical L-asparaginase 916410:917351 forward MW:32473	32452	0	0	3.17718e-05	1.29965e-05	0	0	0
SL1344_0824	yliA	SL1344_0824 hypothetical ABC transporter ATP-binding protein 917362:919233 forward MW:69119	69075	0	0	0	0	0	0	0
SL1344_0825	yliB	SL1344_0825 hypothetical ABC transporter periplasmic binding protein 919266:920804 forward MW:56538	56503	0	0	0	0	0	-7.02237	-7.02237
SL1344_0826	yliC	SL1344_0826 hypothetical ABC transporter permease protein 920865:921785 forward MW:33975	33953	0	0	0	1.29686e-05	0	0	0
SL1344_0828	rimO	SL1344_0828 conserved hypothetical protein 922790:924115 reverse MW:49597	49565	0	0	0	0	0	0	0
SL1344_0829	bssR	SL1344_0829 conserved hypothetical protein 924346:924729 forward MW:14266	14257	0	0	0	0	0	0	0
SL1344_0838	yliJ	SL1344_0838 glutathione s-transferase family protein 933888:934514 reverse MW:23692	23677	0	0	0	0	0	0	0
SL1344_0839	dacC	SL1344_0839 D-alanyl-D-alanine carboxypeptidase (penicillin-binding protein 6 precursor) 934758:935960 forward MW:43664	43636	0	0	0	0	0	-8.7039	-8.7039
SL1344_0840	deoR	SL1344_0840 deoxyribose operon repressor 936005:936763 reverse MW:28204	28186	0	0	0	4.17306e-05	0	0	0
SL1344_0843	0	SL1344_0843 conserved hypothetical protein 939042:939857 reverse MW:30207	30188	0	0	0	0	0	0	0
SL1344_0846	0	SL1344_0846 hypothetical membrane protein 941970:943655 reverse MW:60181	60142	0	0	0	0	0	0	0
SL1344_0848	grxA	SL1344_0848 glutaredoxin 1 944335:944598 reverse MW:9924	9918	0	0	0	0	0	-6.62936	-6.62936
SL1344_0852	rimK	SL1344_0852 ribosomal protein S6 modification protein 945821:946723 forward MW:32294	32273	0	0	0	9.86431e-06	0	0	0
SL1344_0853	ybjN	SL1344_0853 conserved hypothetical protein 946820:947296 forward MW:17692	17681	0	0	0	0	0	0	0
SL1344_0854	potF	SL1344_0854 putrescine-binding periplasmic protein precursor 947645:948757 forward MW:40885	40860	0	0	0	0	0	-6.37504	-6.37504
SL1344_0859	rumB	SL1344_0859 hypothetical RNA methyltransferase 952373:953503 forward MW:42206	42179	0	0	0	8.33617e-06	0	0	0
SL1344_0863	artJ	SL1344_0863 arginine-binding periplasmic protein 2 precursor 957195:957926 reverse MW:26699	26683	0	0	0	0	0	-5.35755	-5.35755
SL1344_0864	artM	SL1344_0864 arginine transport system permease protein ArtM 958163:958831 reverse MW:24805	24789	0	0	0	4.08285e-06	0	0	0
SL1344_0866	artI	SL1344_0866 arginine-binding periplasmic protein 1 precursor 959554:960285 reverse MW:27022	27006	0	0	0	0	0	0	0
SL1344_0867	artP	SL1344_0867 arginine transport ATP-binding protein ArtP 960303:961031 reverse MW:26933	26916	0	0	0	0	0	0	0
SL1344_0868	ybjP	SL1344_0868 probable lipoprotein 961261:961776 reverse MW:18810	18798	0	0	0	0	-5.35315	-2.35755	2.99559
SL1344_0869	orfB	SL1344_0869 conserved hypothetical protein 961904:962227 forward MW:11437	11430	0	7.65982e-07	3.27305e-05	4.07482e-06	0	-5.39232	-5.39232
SL1344_0870	ybjR	SL1344_0870 hypothetical N-acetylmuramoyl-L-alanine amidase 962224:963054 forward MW:30737	30718	0	0	0	4.22661e-06	0	0	0
SL1344_0871	0	SL1344_0871 hypothetical oxidoreductase 963051:964064 reverse MW:37979	37955	0	0	0	0	0	0	0
SL1344_0872	ybjT	SL1344_0872 conserved hypothetical protein 964160:965593 reverse MW:53995	53961	0	0	0	0	0	0	0
SL1344_0873	ltaA	SL1344_0873 L-allo-threonine aldolase 965604:966605 reverse MW:36353	36331	0	0	0	0	0	-5.39232	-5.39232
SL1344_0874	poxB	SL1344_0874 pyruvate dehydrogenase 966644:968362 reverse MW:61684	61644	0	0	0	4.16935e-06	-8.30378	-6.97728	1.3265
SL1344_0875	hcr	SL1344_0875 hybrid-cluster protein oxidoreductase-FAD and [2FE-2S] cofactors, NADH as electron donor 968520:969491 reverse MW:35792	35769	0	0	3.15684e-05	1.25765e-05	0	-6.35755	-6.35755
SL1344_0876	hcp	SL1344_0876 hydroxylamine reductase, hybrid cluster [2Fe-2S] protein 969500:971152 reverse MW:60088	60049	0	0	0	8.2097e-06	0	-8.10852	-8.10852
SL1344_0877	ybjE	SL1344_0877 hypothetical membrane protein 971296:972087 reverse MW:28384	28366	0	0	0	2.75649e-05	0	0	0
SL1344_0878	ybjD	SL1344_0878 conserved hypothetical protein 972397:974055 forward MW:63547	63506	0	0	0	0	0	0	0
SL1344_0879	ybjX	SL1344_0879 hypothetical virK protein 974052:975020 reverse MW:37523	37499	0	0	0	0	0	0	0
SL1344_0880	ybjY	SL1344_0880 hypothetical exported protein 975148:976266 forward MW:40805	40780	0	0	0	0	0	-6.37504	-6.37504
SL1344_0881	ybjZ	SL1344_0881 conserved hypothetical ABC transporter 976263:978209 forward MW:70769	70724	0	0	0	8.31985e-06	0	0	0
SL1344_0882	cspD	SL1344_0882 cold shock-like protein CspD 978339:978560 reverse MW:7884	7880	0	0	0	0	0	-5.42626	-5.42626
SL1344_0883	clpS	SL1344_0883 conserved hypothetical protein 978884:979204 forward MW:12152	12144	0	0	0	4.32059e-06	0	0	0
SL1344_0884	clpA	SL1344_0884 ATP-dependent Clp protease ATP-binding subunit ClpA 979235:981511 forward MW:84037	83985	0	0	0	0	0	-9.61102	-9.61102
SL1344_0887	0	SL1344_0887 ISPsy11, transposase OrfA 983478:983879 reverse MW:15589	15579	0	0	0	7.81759e-05	0	0	0
SL1344_0888	0	SL1344_0888 conserved hypothetical protein 984216:984893 reverse MW:24164	24149	0	0	0	0	0	0	0
SL1344_0890	0	SL1344_0890 hypothetical transcriptional activator 985882:986793 forward MW:33830	33809	0	0	0	0	0	0	0
SL1344_0891	infA	SL1344_0891 initiation factor IF-1 986884:987102 reverse MW:8249	8244	0	0	0	0	0	-5.42626	-5.42626
SL1344_0894	cydC	SL1344_0894 transport ATP-binding protein CydC 988163:989884 reverse MW:62990	62950	0	0	0	4.30993e-06	0	-5.32193	-5.32193
SL1344_0895	cydD	SL1344_0895 transport ATP-binding protein CydD 989885:991651 reverse MW:64820	64779	0	0	0	4.01341e-06	0	0	0
SL1344_0896	trxB	SL1344_0896 thioredoxin reductase 991765:992733 reverse MW:34684	34662	0	0	0	0	-9.39874	-8.53528	0.863468
SL1344_0897	lrp	SL1344_0897 leucine-responsive regulatory protein 993279:993773 forward MW:18857	18845	0	0	6.74527e-05	3.71262e-05	-5.35755	3	8.35755
SL1344_0898	ftsK	SL1344_0898 cell division protein FtsK 993908:997993 forward MW:149441	149347	0	7.67898e-07	3.28124e-05	0	0	-6.24793	-6.24793
SL1344_0899	lolA	SL1344_0899 outer membrane lipoprotein carrier protein precursor 998133:998747 forward MW:22612	22598	0	0	0	7.61736e-06	0	0	0
SL1344_0900	ycaJ	SL1344_0900 conserevd hypothetical protein 998757:1000100 forward MW:49573	49542	0	0	0	0	0	-5.24793	-5.24793
SL1344_0901	serS	SL1344_0901 seryl-tRNA synthetase 1000359:1001651 forward MW:48580	48550	0	0	0	3.79029e-06	-10.8455	-10.207	0.638476
SL1344_0902	dmsA	SL1344_0902 anaerobic dimethyl sulfoxide reductase chain A precursor 1001888:1004332 forward MW:90347	90289	0	0	0.000183985	0.000118242	0	-7.43463	-7.43463
SL1344_0903	dmsB	SL1344_0903 anaerobic dimethyl sulfoxide reductase chain B 1004343:1004960 forward MW:22779	22765	0	0	0	1.72693e-05	0	0	0
SL1344_0904	dmsC	SL1344_0904 anaerobic dimethyl sulfoxide reductase chain C 1004962:1005825 forward MW:30953	30931	0	0	0	0	0	0	0
SL1344_0907	pflA	SL1344_0907 pyruvate formate-lyase 1 activating enzyme 1009255:1010079 reverse MW:31315	31295	0	0	0	0	0	-5.32193	-5.32193
SL1344_0909	sopD2	SL1344_0909 type III secretion system effector protein 1010628:1011587 forward MW:37782	37758	0	0	0	3.99046e-06	0	0	0
SL1344_0910	pflB	SL1344_0910 formate acetyltransferase 1 1011663:1013945 reverse MW:85005	84950	0	0	0	0	-11.0279	-14.0014	-2.9735
SL1344_0911	focA	SL1344_0911 probable formate transporter (formate channel) 1014005:1014862 reverse MW:30969	30948	0	0	0.000208818	0.00163998	0	0	0
SL1344_0912	ycaO	SL1344_0912 conserved hypothetical protein 1015267:1017027 reverse MW:65342	65301	0	0	0	0	0	-8.05528	-8.05528
SL1344_0914	serC	SL1344_0914 phosphoserine aminotransferase 1018042:1019130 forward MW:39832	39807	0	0	0	2.66451e-05	-9.34873	-9.74483	-0.396106
SL1344_0915	aroA	SL1344_0915 3-phosphoshikimate 1-carboxyvinyltransferase 1019201:1020484 forward MW:46132	46103	0	0	6.52337e-05	8.57816e-05	0	-7.01123	-7.01123
SL1344_0916	ycaL	SL1344_0916 hypothetical lipoprotein 1020627:1021388 forward MW:26819	26802	0	0	0	1.2933e-05	0	0	0
SL1344_0917	cmk	SL1344_0917 cytidylate kinase 1021561:1022244 forward MW:24783	24768	0	0	0	0	0	0	0
SL1344_0918	rpsA	SL1344_0918 30S ribosomal protein S1 1022358:1024031 forward MW:61173	61136	0	0	0	0	-5.7662	-9.20755	-3.44135
SL1344_0919	himD	SL1344_0919 integration host factor beta-subunit (IHF-beta) 1024187:1024471 forward MW:10621	10615	0	2.13948e-05	0.00116467	0.0126521	4.16993	-3.22239	-7.39232
SL1344_0921	msbA	SL1344_0921 probable transport ATP-binding protein MsbA 1027002:1028750 forward MW:64340	64299	0	1.80649e-06	0	1.67838e-05	0	-6.94251	-6.94251
SL1344_0922	lpxK	SL1344_0922 tetraacyldisaccharide 4~-kinase 1028747:1029724 forward MW:34995	34973	0	0	0	1.22983e-05	0	0	0
SL1344_0925	kdsB	SL1344_0925 3-deoxy-manno-octulosonate cytidylyltransferase 1031231:1031977 forward MW:27432	27415	0	0	0	0	0	-7.08746	-7.08746
SL1344_0926	0	SL1344_0926 conserved hypothetical protein 1032188:1033081 forward MW:34327	34305	0	0	0	1.36333e-05	0	0	0
SL1344_0927	ycbC	SL1344_0927 hypothetical membrane protein 1033061:1033837 reverse MW:28279	28261	0	0	0	0	0	0	0
SL1344_0928	smtA	SL1344_0928 SmtA protein 1033973:1034776 forward MW:30222	30203	0	0	0	0	0	0	0
SL1344_0929	mukF	SL1344_0929 killing factor KicB 1034769:1036091 forward MW:50461	50430	0	0	0	0	0	-6.39232	-6.39232
SL1344_0930	mukE	SL1344_0930 KicA protein 1036072:1036776 forward MW:26973	26957	0	0	0	8.3595e-06	0	0	0
SL1344_0931	mukB	SL1344_0931 cell division protein 1036776:1041242 forward MW:170046	169940	0	0	0	0	-10.6138	-9.89633	0.717457
SL1344_0932	ycbB	SL1344_0932 hypothetical exported protein 1041587:1043428 forward MW:67388	67345	0	0	0.00015665	9.53446e-05	0	-5.42626	-5.42626
SL1344_0934	ycbL	SL1344_0934 conserved hypothetical protein 1044264:1044911 forward MW:23737	23722	0	0	0	4.29362e-06	0	0	0
SL1344_0935	aspC	SL1344_0935 aspartate aminotransferase 1044973:1046163 reverse MW:43521	43494	0	0	0	0	0	-9.50581	-9.50581
SL1344_0936	ompF	SL1344_0936 outer membrane protein F precursor 1046348:1047439 reverse MW:40048	40023	0	0	0	7.26522e-05	0	-10.6777	-10.6777
SL1344_0937	asnC	SL1344_0937 asparaginyl-tRNA synthetase 1048046:1049446 reverse MW:52523	52490	0	0	0	0.000163818	-5.4108	-5.80843	-0.397623
SL1344_0938	0	SL1344_0938 hypothetical transcriptional regulator 1049647:1050108 reverse MW:17487	17476	0	2.3905e-06	0.000102146	0.00013453	0	0	0
SL1344_0941	pncB	SL1344_0941 nicotinate phosphoribosyltransferase (ec 2.4.2.11) (naprtase) 1053398:1054600 reverse MW:45661	45632	0	0	0	0	0	0	0
SL1344_0946	recE	SL1344_0946 exodeoxyribonuclease viii 1057823:1060708 reverse MW:106524	106457	0	0	0	0	0	0	0
SL1344_0950	0	SL1344_0950 predicted bacteriophage protein 1061617:1061958 reverse MW:12970	12962	0	0	0	0	0	0	0
SL1344_0956	0	SL1344_0956 predicted bacteriophage protein 1065290:1065580 forward MW:11306	11300	0	0	0	0	0	0	0
SL1344_0957	0	SL1344_0957 DNA Damage Inducible Protein 1065872:1066105 forward MW:8778	8773	0	0	0	0	0	0	0
SL1344_0964	0	SL1344_0964 hypothetical bacteriophage lipoprotein 1069692:1070141 reverse MW:15709	15699	0	0	0	0	0	0	0
SL1344_0965	gtgA	SL1344_0965 hypothetical bacteriophage encoded virulence protein 1070502:1071188 reverse MW:25925	25909	0	0	0	0	0	0	0
SL1344_0983	sodC	SL1344_0983 bacteriophage encoded superoxide dismutase [cu-zn] 1 precursor (ec 1.15.1.1) (sodCI) 1086605:1087138 reverse MW:18370	18358	0	0	0	0	-4.15785	-0.0703893	4.08746
SL1344_0995	gtgE	SL1344_0995 bacteriophage encoded virulence factor 1098888:1099574 reverse MW:26064	26047	0	4.00428e-06	7.14499e-05	4.21353e-06	0	0	0
SL1344_0997	pepN	SL1344_0997 aminopeptidase N 1100463:1103075 forward MW:98714	98652	0	0	0	0	-8.24317	-9.88111	-1.63794
SL1344_0998	pyrD	SL1344_0998 dihydroorotate dehydrogenase 1103256:1104293 forward MW:37711	37687	0	0	3.03123e-05	9.43442e-05	0	-5.24793	-5.24793
SL1344_1000	0	SL1344_1000 conserved hypothetical protein 1104998:1106107 reverse MW:40491	40466	0	0	0	3.84441e-06	0	0	0
SL1344_1001	rlmL	SL1344_1001 conserved hypothetical protein 1106206:1108314 forward MW:78849	78799	0	0	0	0	0	0	0
SL1344_1002	uup	SL1344_1002 ABC transporter ATP-binding protein 1108327:1110234 forward MW:72192	72146	0	0	0	0	0	-7.37504	-7.37504
SL1344_1004	pqiB	SL1344_1004 hypothetical secreted protein 1111507:1113147 forward MW:60654	60616	0	0	0	1.6559e-05	0	-6.9542	-6.9542
SL1344_1005	ymbA	SL1344_1005 hypothetical lipoprotein 1113144:1113707 forward MW:20605	20593	0	0	0	1.23667e-05	0	0	0
SL1344_1006	rmf	SL1344_1006 ribosome modulation factor (protein E) 1113963:1114130 forward MW:6571	6567	0	0	0	0	0	-5.45943	-5.45943
SL1344_1007	fabA	SL1344_1007 D-3-hydroxydecanoyl-(acyl carrier-protein) 1114230:1114748 reverse MW:19047	19035	0	0	0	4.3543e-06	-8.37069	0	8.37069
SL1344_1008	lonH	SL1344_1008 conserved hypothetical protein 1114817:1116403 reverse MW:58912	58875	0	0	3.31432e-05	0	0	-5.24793	-5.24793
SL1344_1009	ycbG	SL1344_1009 conserved hypothetical protein 1116763:1117215 forward MW:17800	17790	0	0	0	3.75361e-06	0	0	0
SL1344_1010	ompA	SL1344_1010 outer membrane protein A 1117287:1118339 reverse MW:37515	37492	0	0	0	0	-6.8232	-5.02754	1.79566
SL1344_1013	yccS	SL1344_1013 hypothetical membrane protein 1120014:1122167 reverse MW:81430	81378	0.000373102	5.86827e-05	0.00664704	0.00191465	0	0	0
SL1344_1014	yccF	SL1344_1014 hypothetical membrane protein 1122186:1122632 reverse MW:16370	16360	0	0	0	0	0	0	0
SL1344_1015	helD	SL1344_1015 helicase IV (75 kD helicase) 1122756:1124810 forward MW:78072	78023	0	0	0	0	0	0	0
SL1344_1016	mgsA	SL1344_1016 methylglyoxal synthase 1124846:1125304 reverse MW:16990	16980	0	0	0	0	0	0	0
SL1344_1018	0	SL1344_1018 conserved hypothetical protein 1126232:1126648 forward MW:14908	14899	0	0	0	0	0	-8.31741	-8.31741
SL1344_1019	yccV	SL1344_1019 conserved hypothetical protein 1126693:1127010 reverse MW:11996	11989	0	0	0	3.19164e-05	0	0	0
SL1344_1020	yccW	SL1344_1020 conserved hypothetical protein 1127068:1128279 reverse MW:45176	45147	0	0	0	0	0	-6.98868	-6.98868
SL1344_1023	yccX	SL1344_1023 hypothetical acylphosphatase 1129896:1130177 forward MW:10328	10322	0	0	0	1.26648e-05	0	0	0
SL1344_1024	yccK	SL1344_1024 hypothetical protein in helD-serT intergenic region 1130174:1130503 reverse MW:12300	12292	0	0	0	0	0	0	0
SL1344_1026	pipA	SL1344_1026 conserved hypothetical protein 1131870:1132550 reverse MW:26009	25993	0	0	0	0	0	0	0
SL1344_1029	pipC	SL1344_1029 cell invasion protein 1134195:1134536 reverse MW:12751	12743	0	0	0	0	0	-5.39232	-5.39232
SL1344_1030	sopB	SL1344_1030 Type III secretion system effector protein. Activates Cdc42, RhoG, AktA and chloride secretion through its inositol phosphatase activity and disrupts tight junctions 1134553:1136238 reverse MW:61935	61896	0	0	0	4.22467e-06	0	-7.7879	-7.7879
SL1344_1033	pipD	SL1344_1033 hypothetical secreted peptidase 1136960:1138429 reverse MW:55148	55113	0	0	0	2.20988e-05	0	-6.39232	-6.39232
SL1344_1039	hpaR	SL1344_1039 homoprotocatechuate degradative operon repressor 1143828:1144268 reverse MW:16895	16885	0	0	0	8.43302e-06	0	0	0
SL1344_1041	hpaE	SL1344_1041 5-carboxymethyl-2-hydroxymuconate semialdehyde dehydrogenase (ec 1.2.1.-) (chms dehydrogenase) 1145829:1147295 forward MW:53040	53006	0	0	0	0	0	0	0
SL1344_1051	cbpA	SL1344_1051 curved DNA-binding protein 1155321:1156241 reverse MW:34693	34672	0	0	0	0	2.80735	-4.7318	-7.53916
SL1344_1056	agp	SL1344_1056 glucose-1-phosphatase precursor (G1Pase), secreted 1160022:1161263 forward MW:45559	45530	0	7.47962e-07	0	1.85685e-05	3	-6.30606	-9.30606
SL1344_1057	yccJ	SL1344_1057 conserved hypothetical protein 1161297:1161524 reverse MW:8689	8684	0	7.63931e-07	0	6.32808e-05	0	0	0
SL1344_1058	wrbA	SL1344_1058 trp repressor binding protein 1161545:1162141 reverse MW:20867	20854	0	0	0	0	-6.41655	4.70044	11.117
SL1344_1060	ycdC	SL1344_1060 hypothetical transcriptional regulator 1162830:1163468 forward MW:23806	23791	0	2.64925e-06	0.000222134	0	0	0	0
SL1344_1061	0	SL1344_1061 hypothetical secreted protein 1163465:1163860 reverse MW:14132	14123	0	0	0	0	0	-5.35755	-5.35755
SL1344_1062	putA	SL1344_1062 proline dehydrogenase (proline oxidase) 1163919:1167881 reverse MW:144091	143999	0	0	0	4.14193e-06	-6.5666	-6.035	0.531602
SL1344_1063	putP	SL1344_1063 sodium/proline symporter (proline permease) 1168303:1169811 forward MW:54318	54283	0	1.38063e-06	0.000132738	9.18074e-05	0	-5.39232	-5.39232
SL1344_1064	phoH	SL1344_1064 PhoH protein (phosphate starvation-inducible protein PsiH) 1170638:1171492 forward MW:31745	31725	0	0	0	4.15301e-06	0	0	0
SL1344_1065	0	SL1344_1065 hypothetical transcriptional regulator 1171598:1172479 reverse MW:31855	31835	0	0	0	0	0	-6.40939	-6.40939
SL1344_1067	0	SL1344_1067 conserved hypothetical protein 1174597:1175277 reverse MW:23972	23957	0	0	0	8.52456e-06	0	0	0
SL1344_1068	0	SL1344_1068 conserved hypothetical protein 1175783:1176943 forward MW:42491	42464	0	0	0	0	0	0	0
SL1344_1069	0	SL1344_1069 hypothetical secreted protein 1176989:1177681 forward MW:26815	26798	0	0	0	0	0	0	0
SL1344_1070	0	SL1344_1070 hypothetical transporter 1177964:1179244 forward MW:46492	46461	0	0	0	0	0	0	0
SL1344_1071	0	SL1344_1071 hypothetical oxidoreductase 1179255:1180361 forward MW:40107	40081	0	0	0	0	-8.35755	-6.35755	2
SL1344_1072	ycdW	SL1344_1072 hypothetical 2-hydroxyacid dehydrogenase in phoh-csgg intergenic region 1181205:1182143 forward MW:35034	35012	0	0	3.28413e-05	8.17724e-06	-8.33539	-7.5157	0.819691
SL1344_1073	ycdX	SL1344_1073 conserved hypothetical protein 1182228:1182965 forward MW:26905	26889	0	0	3.22739e-05	1.83041e-05	0	0	0
SL1344_1074	ycdY	SL1344_1074 conserved hypothetical protein 1182989:1183543 forward MW:20716	20703	0	0	0	0	0	0	0
SL1344_1084	0	SL1344_1084 Hypothetical UPF0189 protein <ORFName>. 1189154:1189693 forward MW:19195	19184	0	0	0	0	0	0	0
SL1344_1087	mdoG	SL1344_1087 Glucans biosynthesis protein G precursor. 1192559:1194094 forward MW:57849	57812	0	0	0	0	-8.20945	-8.81378	-0.604328
SL1344_1088	mdoH	SL1344_1088 Glucans biosynthesis glucosyltransferase H 1194087:1196630 forward MW:97101	97038	0	0	2.9606e-05	4.49672e-05	-8.21917	-5.20945	3.00972
SL1344_1090	msyB	SL1344_1090 acidic protein MsyB; multicopy suppressor of SecY 1196932:1197306 reverse MW:14397	14388	0	0	2.98164e-05	3.71203e-06	-8.33985	0	8.33985
SL1344_1092	htrB	SL1344_1092 lipid A biosynthesis lauroyl acyltransferase (EC 2.3.1.-) (heat shock protein) 1198757:1199677 reverse MW:35214	35190	0	0	3.24202e-05	0	0	0	0
SL1344_1094	yceI	SL1344_1094 Hypothetical UPF0312 protein <ORFName> precursor. 1201001:1201576 reverse MW:21022	21010	0	0	0	0	0	0	0
SL1344_1097	solA	SL1344_1097 N-methyl-L-tryptophan oxidase 1202562:1203680 reverse MW:40664	40638	0	0	0	0	0	-6.37504	-6.37504
SL1344_1098	bssS	SL1344_1098 conserved hypothetical protein 1203793:1204050 reverse MW:9848	9842	0	0	0	8.29087e-06	0	0	0
SL1344_1100	pyrC	SL1344_1100 Dihydroorotase 1204656:1205702 reverse MW:38605	38580	0	0	0	0	-9.39232	-8.48784	0.904477
SL1344_1101	yceB	SL1344_1101 conserved hypothetical protein 1205807:1206367 reverse MW:20620	20607	0	0	6.71744e-05	3.59115e-05	-8.40088	0	8.40088
SL1344_1102	grxB	SL1344_1102 glutaredoxin 2 1206492:1207139 reverse MW:24463	24448	0	0	3.37697e-05	0	-5.40547	-1.7425	3.66297
SL1344_1104	rimJ	SL1344_1104 ribosomal-protein-alanine acetyltransferase 1208648:1209232 forward MW:22607	22592	0	2.57842e-06	0.000110176	8.7287e-06	0	0	0
SL1344_1105	yceH	SL1344_1105 conserved hypothetical protein 1209268:1209915 forward MW:24120	24105	0	0	0	0	0	0	0
SL1344_1106	mviM	SL1344_1106 hypothetical virulence factor MviM 1209917:1210840 forward MW:33979	33957	0	0	0	0	0	0	0
SL1344_1108	flgN	SL1344_1108 flagella synthesis protein FlgN 1212761:1213183 reverse MW:15989	15979	0	0	0	0	0	0	0
SL1344_1109	flgM	SL1344_1109 negative regulator of flagellin synthesis (anti-sigma factor) 1213188:1213481 reverse MW:10568	10561	0	0	0	0	0	0	0
SL1344_1111	flgB	SL1344_1111 hypothetical flagellar basal-body rod protein FlgB (proximal rod protein) 1214389:1214805 forward MW:15129	15120	0	0	0	0	0	0	0
SL1344_1112	flgC	SL1344_1112 hypothetical flagellar basal-body rod protein FlgC (proximal rod protein) 1214809:1215213 forward MW:13982	13973	0	0	0	0	0	0	0
SL1344_1113	flgD	SL1344_1113 flagellar hook formation protein FlgD 1215225:1215923 forward MW:23988	23973	0	0	0	0	0	0	0
SL1344_1114	flgE	SL1344_1114 flagellar hook protein FlgE 1215950:1217161 forward MW:42210	42185	0	0	0	0	0	0	0
SL1344_1116	flgG	SL1344_1116 flagellar basal-body rod protein FlgG (distal rod protein) 1217951:1218733 forward MW:27770	27753	0	0	0	0	0	0	0
SL1344_1117	flgH	SL1344_1117 Flagellar L-ring protein precursor 1218788:1219486 forward MW:24709	24693	0	0	0	0	0	0	0
SL1344_1118	flgI	SL1344_1118 Flagellar P-ring protein precursor 1219498:1220595 forward MW:38169	38145	0	0	0	0	0	0	0
SL1344_1120	flgK	SL1344_1120 flagellar hook-associated protein 1 1221610:1223271 forward MW:59109	59074	0	0	0	0	0	0	0
SL1344_1121	flgL	SL1344_1121 flagellar hook-associated protein 3 1223286:1224239 forward MW:34175	34154	0	0	0	0	0	0	0
SL1344_1122	ams	SL1344_1122 ribonuclease E 1224496:1227699 reverse MW:119403	119329	0	0	0	0	-8.44797	-8.45562	-0.00765201
SL1344_1123	rluC	SL1344_1123 ribosomal large subunit pseudouridine synthase C (EC 4.2.1.70) 1228273:1229232 forward MW:35939	35916	0	1.43013e-06	0.000488876	0.000491469	0	0	0
SL1344_1126	maf	SL1344_1126 conserved hypothetical protein 1230633:1231217 reverse MW:21492	21479	0	0	0	0	0	0	0
SL1344_1127	yceD	SL1344_1127 conserved hypothetical protein 1231415:1231936 forward MW:19188	19177	0	0	0	0	0	-6.45943	-6.45943
SL1344_1128	rpl32	SL1344_1128 50S ribosomal protein L32. Chloroplast 50S ribosomal protein L32. 1231988:1232161 forward MW:6446	6442	0	0	0	8.80301e-06	-8.45121	-15.5754	-7.12415
SL1344_1129	plsX	SL1344_1129 Fatty acid/phospholipid synthesis protein plsX. 1232295:1233374 forward MW:38716	38692	0	0	3.49695e-05	0.00488256	0	0	0
SL1344_1130	fabH	SL1344_1130 3-oxoacyl-[acyl-carrier-protein] synthase III 1233454:1234407 forward MW:33523	33502	0	0	0	0	-9.42206	-8.26679	1.15528
SL1344_1131	fabD	SL1344_1131 malonyl CoA-acyl carrier protein transacylase 1234423:1235352 forward MW:32405	32385	0	0	6.86267e-05	3.07575e-05	-8.37504	-8.27612	0.098915
SL1344_1132	fabG	SL1344_1132 3-oxoacyl-[acyl-carrier protein] reductase 1235365:1236099 forward MW:25545	25529	0	0	3.31693e-05	3.09709e-05	-4.89121	-2.39788	2.49333
SL1344_1133	acpP	SL1344_1133 acyl carrier protein 1236255:1236491 forward MW:8639	8634	0	3.6715e-06	0.000109818	1.95314e-05	3	3	0
SL1344_1134	fabF	SL1344_1134 3-oxoacyl-[acyl-carrier-protein] synthase II 1236577:1237818 forward MW:42953	42926	0	8.07114e-07	0	0	-5.39917	-4.05658	1.34259
SL1344_1135	pabC	SL1344_1135 4-amino-4-deoxychorismate lyase 1237942:1238751 forward MW:30049	30030	0	2.46939e-06	0.000105517	4.15989e-05	0	0	0
SL1344_1136	yceG	SL1344_1136 hypothetical secreted protein 1238820:1239776 forward MW:36010	35988	0	0	0	0	0	0	0
SL1344_1137	tmk	SL1344_1137 Thymidylate kinase 1239766:1240407 forward MW:23724	23709	0	0	0	0	0	0	0
SL1344_1138	holB	SL1344_1138 DNA polymerase III, delta~ subunit 1240404:1241408 forward MW:36843	36820	0	0	0	0	0	0	0
SL1344_1139	ycfH	SL1344_1139 conserved hypothetical protein 1241419:1242216 forward MW:29821	29802	0	0	0	0	0	-5.39232	-5.39232
SL1344_1140	ptsG	SL1344_1140 PTS system, glucose-specific IIBC component 1242511:1243944 forward MW:50497	50465	0	0	0	4.18009e-06	0	-6.39232	-6.39232
SL1344_1141	fhuE	SL1344_1141 outer-membrane receptor for Fe(iii)-coprogen, fe(iii)-ferrioxamine b and fe(iii)-rhodotrulic acid 1244029:1246203 reverse MW:80894	80843	0	0	0	8.3653e-06	0	-9.74147	-9.74147
SL1344_1142	ycfF	SL1344_1142 hypothetical protein kinase C inhibitor 1246545:1246904 forward MW:13269	13261	0	0	0	8.55596e-05	3	-4.31288	-7.31288
SL1344_1143	ycfL	SL1344_1143 hypothetical lipoprotein 1246907:1247281 forward MW:13619	13611	0	7.94647e-07	0	1.58947e-05	0	0	0
SL1344_1144	ycfM	SL1344_1144 hypothetical lipoprotein 1247295:1247933 forward MW:22523	22510	0	0	0	0	0	0	0
SL1344_1146	nagZ	SL1344_1146 Beta-hexosaminidase 1248749:1249774 forward MW:37698	37674	0	0	0	0	0	0	0
SL1344_1147	ycfP	SL1344_1147 conserved hypothetical protein 1249799:1250341 forward MW:21077	21064	0	0	0	0	3	3	0
SL1344_1148	ndh	SL1344_1148 NADH dehydrogenase 1250596:1251900 forward MW:47378	47348	0	7.57339e-07	0	0	0	-6.98868	-6.98868
SL1344_1150	ycfQ	SL1344_1150 hypothetical TetR-family regulatory protein 1252693:1253328 reverse MW:23693	23678	0	0	0	1.26785e-05	0	0	0
SL1344_1153	mfd	SL1344_1153 transcription-repair coupling factor (TrcF) 1255037:1258483 reverse MW:129910	129827	0	0	0	0	0	-8.21917	-8.21917
SL1344_1154	ycfU	SL1344_1154 ABC transporter integral membrane subunit 1258821:1260020 forward MW:43281	43253	0	0	0	2.97979e-05	0	0	0
SL1344_1155	lolD	SL1344_1155 ABC transporter ATP-binding subunit 1260013:1260714 forward MW:25479	25463	0	0	0	0	0	0	0
SL1344_1156	ycfW	SL1344_1156 ABC transporter integral membrane subunit 1260714:1261958 forward MW:44982	44953	0	0	0	0	0	0	0
SL1344_1157	ycfX	SL1344_1157 hypothetical ROK-family protein 1261987:1262898 forward MW:33060	33039	0	0	0	0	0	-5.39232	-5.39232
SL1344_1158	cobB	SL1344_1158 NAD-dependent deacetylase 1262917:1263738 forward MW:31138	31118	0	0	0	4.21284e-06	0	-6.37504	-6.37504
SL1344_1159	potD	SL1344_1159 spermidine/putrescine-binding periplasmic protein precursor 1263820:1264866 reverse MW:39021	38997	0	0	0	8.33257e-06	-5.51457	-6.77385	-1.25927
SL1344_1163	potA	SL1344_1163 spermidine/putrescine transport ATP-binding protein PotA (ABC superfamily) 1268172:1269308 reverse MW:42840	42813	0	7.4779e-07	3.19531e-05	7.65773e-05	0	-6.35755	-6.35755
SL1344_1164	pepT	SL1344_1164 Peptidase T 1269559:1270788 forward MW:44849	44821	0	0	0	8.1887e-06	0	-7.46761	-7.46761
SL1344_1167	ycfD	SL1344_1167 conserved hypothetical protein 1272877:1273998 reverse MW:42589	42562	0	0	0	1.7717e-05	0	-5.24793	-5.24793
SL1344_1168	phoQ	SL1344_1168 sensor protein PhoQ, regulator of virulence determinants 1274079:1275542 reverse MW:55467	55432	0	0	0	3.79899e-06	0	-6.40939	-6.40939
SL1344_1169	phoP	SL1344_1169 transcriptional regulatory protein PhoP, regulator of virulence determinants 1275542:1276216 reverse MW:25633	25617	0	0	0	8.48184e-06	-4.64294	-1.63743	3.00551
SL1344_1170	purB	SL1344_1170 adenylosuccinate lyase 1276340:1277710 reverse MW:51547	51515	0	6.26306e-06	0.000157424	1.95987e-05	-6.61471	-7.60839	-0.993677
SL1344_1171	ycfC	SL1344_1171 conserved hypothetical protein 1277714:1278361 reverse MW:23129	23114	0	7.40872e-07	6.85914e-05	0.00013663	0	0	0
SL1344_1172	mnmA	SL1344_1172 Probable tRNA 1278442:1279548 reverse MW:40870	40845	0	0	0	0	0	-5.39232	-5.39232
SL1344_1173	ymfB	SL1344_1173 hypothetical mutT family protein 1279602:1280063 reverse MW:17435	17425	0	0	0	4.16655e-06	0	0	0
SL1344_1176	icdA	SL1344_1176 isocitrate dehydrogenase 1281238:1282488 forward MW:45788	45759	0	0	0	0	-5.41002	-5.52762	-0.117602
SL1344_1177	0	SL1344_1177 predicted bacteriophage protein 1282936:1284060 forward MW:42268	42241	0	5.37441e-06	0.000229649	0.000249145	0	0	0
SL1344_1181	envE	SL1344_1181 hypothetical lipoprotein 1286749:1287270 reverse MW:19063	19052	0	0	0	0	-5.37504	3	8.37504
SL1344_1184	pagC	SL1344_1184 outer membrane invasion protein (PagC) 1289191:1289661 forward MW:17170	17159	0	7.76332e-07	3.31728e-05	0	-3.21028	-0.66458	2.5457
SL1344_1185	pliC	SL1344_1185 hypothetical secreted protein 1290898:1291242 reverse MW:12575	12567	0	1.8796e-05	0.000173988	2.97563e-05	0	-7.32193	-7.32193
SL1344_1187	0	SL1344_1187 hypothetical heat shock protein 1292369:1292836 forward MW:17551	17540	0	0	0	1.60243e-05	0	0	0
SL1344_1190	0	SL1344_1190 hypothetical lipoprotein 1294980:1295294 reverse MW:10633	10626	0	0	0	0	0	-5.39232	-5.39232
SL1344_1191	0	SL1344_1191 hypothetical substrate-binding transport protein 1295976:1297610 forward MW:60028	59991	0	0	0	4.20029e-06	0	-10.5206	-10.5206
SL1344_1197	0	SL1344_1197 conserved hypothetical protein 1302170:1302496 forward MW:12094	12085	0	0	0	0.000146871	0	0	0
SL1344_1198	0	SL1344_1198 conserved hypothetical protein 1302693:1303340 forward MW:24624	24608	0	0	0	0	0	-7.62936	-7.62936
SL1344_1202	0	SL1344_1202 hypothetical protein 1306147:1306395 reverse MW:9375	9370	0	0	0	1.97681e-05	0	0	0
SL1344_1204	aroQ	SL1344_1204 chorismate mutase 1306706:1307251 forward MW:20582	20569	0	0	0	0	-5.3966	3	8.3966
SL1344_1211	yaoF	SL1344_1211 conserved hypothetical protein 1310672:1310923 forward MW:9213	9208	0	7.88844e-07	3.37074e-05	0	0	0	0
SL1344_1213	yeaO	SL1344_1213 predicted bacteriophage protein 1311289:1311636 reverse MW:13629	13621	0	0	0	0	0	0	0
SL1344_1217	yeaK	SL1344_1217 conserved hypothetical protein 1314570:1315088 reverse MW:18506	18495	0	0	0	0	0	0	0
SL1344_1219	yeaH	SL1344_1219 conserved hypothetical protein 1317272:1318558 reverse MW:49516	49485	0	0	0	0	0	0	0
SL1344_1220	yeaG	SL1344_1220 conserved hypothetical protein 1318681:1320465 reverse MW:68511	68468	0	0	0	0	-6.93958	-5.33539	1.60419
SL1344_1221	mipA	SL1344_1221 hypothetical outer membrane protein 1321042:1321788 forward MW:27992	27975	0	8.2057e-07	9.81766e-05	3.23026e-05	0	0	0
SL1344_1223	0	SL1344_1223 hypothetical oxidoreductase 1323371:1324228 forward MW:31328	31308	0	0	0	0	0	-5.32193	-5.32193
SL1344_1224	yeaD	SL1344_1224 conserved hypothetical protein 1324327:1325211 reverse MW:32560	32540	0	0	0	3.99212e-06	3	-4.05528	-7.05528
SL1344_1225	gapA	SL1344_1225 glyceraldehyde 3-phosphate dehydrogenase A 1325546:1326541 reverse MW:35586	35564	0	7.79966e-07	0	1.32775e-05	-6.01925	-6.34811	-0.328858
SL1344_1226	yeaA	SL1344_1226 conserved hypothetical protein 1326853:1327296 forward MW:16681	16671	0	1.14228e-05	0.000739433	0.000928728	0	0	0
SL1344_1227	yeaC	SL1344_1227 conserved hypothetical protein 1327338:1327616 forward MW:10452	10445	0	0	0	0	0	0	0
SL1344_1229	ansA	SL1344_1229 L-Asparaginase I 1328651:1329667 reverse MW:36845	36822	0	0	0	0	0	0	0
SL1344_1230	sppA	SL1344_1230 protease IV 1329763:1331619 reverse MW:67220	67177	0	0	0	0	0	-7.8009	-7.8009
SL1344_1231	ydjA	SL1344_1231 hypothetical nitroreductase 1331793:1332344 forward MW:20128	20115	0	0	0	2.22711e-05	-9.45121	-5.35755	4.09366
SL1344_1232	selD	SL1344_1232 Selenide,water dikinase 1332462:1333505 forward MW:36438	36414	0	0	7.00473e-05	4.10382e-06	0	-6.39232	-6.39232
SL1344_1233	topB	SL1344_1233 DNA topoisomerase III 1333510:1335459 forward MW:73039	72993	0	0	0	8.35774e-06	0	0	0
SL1344_1234	gdhA	SL1344_1234 NADP-specific glutamate dehydrogenase 1335489:1336832 reverse MW:48575	48543	0	0	0	0	0	-8.65105	-8.65105
SL1344_1235	0	SL1344_1235 hypothetical exported protein 1337071:1337346 forward MW:10220	10213	0	0	0	4.02335e-05	0	0	0
SL1344_1236	0	SL1344_1236 hypothetical MutT-family protein 1337306:1337722 reverse MW:15187	15178	0	0	0	0	0	0	0
SL1344_1237	xthA	SL1344_1237 exodeoxyribonuclease III 1337795:1338601 reverse MW:30785	30766	0	0	0	0	-8.29921	-6.42626	1.87294
SL1344_1238	argD	SL1344_1238 Acetylornithine/succinyldiaminopimelate aminotransferase 1339047:1340273 forward MW:43832	43804	0	0	3.15111e-05	8.63062e-06	0	0	0
SL1344_1239	astA	SL1344_1239 arginine N-succinyltransferase 1340264:1341298 forward MW:38278	38253	0	0	0	0	0	0	0
SL1344_1240	astD	SL1344_1240 succinylglutamic semialdehyde dehydrogenase 1341295:1342773 forward MW:53017	52984	0	0	0	0	0	0	0
SL1344_1243	spy	SL1344_1243 hypothetical exported protein 1345410:1345895 forward MW:18234	18222	0	0	0	0	0	0	0
SL1344_1244	0	SL1344_1244 conserved hypothetical protein 1345970:1346851 reverse MW:33363	33341	0	0	0	0	0	0	0
SL1344_1245	nadE	SL1344_1245 NH3-dependent NAD synthetase 1346972:1347799 reverse MW:30483	30465	0	0	0	0	0	-8.29921	-8.29921
SL1344_1246	osmE	SL1344_1246 osmotically inducible lipoprotein E precursor 1348018:1348359 forward MW:12161	12154	0	0	0	3.14655e-05	-4.22239	-5.22668	-1.00429
SL1344_1247	celA	SL1344_1247 PTS system, cellobiose-specific IIB component 1348660:1348980 forward MW:11313	11306	0	1.77708e-06	3.36105e-05	6.7415e-05	0	0	0
SL1344_1249	celC	SL1344_1249 phosphoenolpyruvate dependent phosphotransferase enzyme III-cellobiose 1350472:1350819 forward MW:12731	12724	0	0	0	0	0	0	0
SL1344_1251	celF	SL1344_1251 phospho-beta-glucosidase B 1351797:1353152 forward MW:50539	50506	0	0	0	0	0	0	0
SL1344_1252	celG	SL1344_1252 conserved hypothetical protein 1353165:1353923 forward MW:27958	27940	0	0	0	0	0	0	0
SL1344_1253	katE	SL1344_1253 catalase HPII 1353967:1356219 reverse MW:83626	83574	0	0	0	0	-9.41996	-7.73471	1.68525
SL1344_1254	cedA	SL1344_1254 cell division activator CedA 1356584:1356826 forward MW:9371	9366	0	0	6.84784e-05	2.13132e-05	0	0	0
SL1344_1255	ydjN	SL1344_1255 hypothetical sodium:dicarboxylate symporter 1356928:1358319 reverse MW:48646	48615	0	0	0	0	0	0	0
SL1344_1257	yniC	SL1344_1257 hypothetical hydrolase 1359193:1359861 reverse MW:24293	24278	0	0	0	0	-9.44294	0	9.44294
SL1344_1258	yniB	SL1344_1258 hypothetical membrane protein 1360010:1360546 forward MW:20498	20485	0	0	6.96247e-05	0	0	0	0
SL1344_1259	0	SL1344_1259 conserved hypothetical protein 1360589:1361449 reverse MW:32601	32580	0	0	0	0	0	-7.05528	-7.05528
SL1344_1260	ydiZ	SL1344_1260 conserved hypothetical protein 1361556:1361846 reverse MW:10442	10436	0	0	0	1.32938e-05	0	0	0
SL1344_1261	pfkB	SL1344_1261 6-phosphofructokinase isozyme 1361943:1362875 reverse MW:32565	32545	0	0	0	0	-8.37938	-8.57743	-0.19805
SL1344_1263	0	SL1344_1263 hypothetical outer membrane protein 1363971:1364930 reverse MW:34840	34818	0	0	3.33332e-05	3.81786e-05	-4.76129	-4.82782	-0.0665338
SL1344_1265	0	SL1344_1265 Putative DNA/RNA non-specific endonuclease 1365483:1366238 forward MW:27319	27303	0	2.50371e-06	6.77563e-05	7.10349e-05	0	0	0
SL1344_1267	thrS	SL1344_1267 Threonyl-tRNA synthetase 1369055:1370983 forward MW:73979	73931	0	0	0	0	-9.94251	-11.0947	-1.15222
SL1344_1268	infC	SL1344_1268 translation initiation factor IF-3 1370987:1371529 forward MW:20576	20563	0	0	9.84379e-05	0.000218707	-6.36923	-0.63743	5.7318
SL1344_1269	rpl35	SL1344_1269 50S ribosomal protein L35. Chloroplast 50S ribosomal protein L35. 1371625:1371822 forward MW:7289	7284	0	2.66157e-06	0.000223247	4.19522e-06	3	3	0
SL1344_1270	rpl20	SL1344_1270 50S ribosomal protein L20. Chloroplast 50S ribosomal protein L20. 1371873:1372229 forward MW:13497	13489	0	8.0313e-07	0	0	3	-6.62753	-9.62753
SL1344_1271	pheS	SL1344_1271 phenylalanyl-tRNA synthetase alpha chain 1372531:1373514 forward MW:36755	36732	0	7.75978e-07	0	7.91199e-05	-5.81868	-4.34925	1.46943
SL1344_1272	pheT	SL1344_1272 Phenylalanyl-tRNA synthetase beta chain 1373530:1375917 forward MW:87326	87270	0	3.43374e-06	0.00019187	6.93193e-05	-10.3891	-10.0458	0.343334
SL1344_1273	himA	SL1344_1273 integration host factor alpha-subunit 1375910:1376221 forward MW:11764	11757	0	0	0.000134075	0.000105715	-4.22668	-3.1788	1.04788
SL1344_1275	btuE	SL1344_1275 hypothetical glutathione peroxidase/vitamin B12 transport periplasmic protein BtuE 1377496:1378047 forward MW:20423	20410	0	1.7754e-06	3.37168e-05	1.63407e-05	0	0	0
SL1344_1278	ydiV	SL1344_1278 conserved hypothetical protein 1379651:1380364 forward MW:26423	26406	0	0	0	0	0	0	0
SL1344_1279	ydiU	SL1344_1279 conserved hypothetical protein 1380426:1381868 forward MW:54953	54918	0	0	0	0	0	0	0
SL1344_1281	aroH	SL1344_1281 3-deoxy-D-arabinoheptulosonate 7-phosphate synthase 1382251:1383297 reverse MW:38750	38726	0	0	0	0	0	0	0
SL1344_1282	ydiA	SL1344_1282 conserved hypothetical protein 1383453:1384286 reverse MW:31149	31129	0	0	0	0	0	0	0
SL1344_1283	pps	SL1344_1283 phosphoenolpyruvate synthase 1384581:1387001 forward MW:88841	88783	0	0	0	0	-10.4136	-10.3343	0.0793546
SL1344_1292	aroD	SL1344_1292 3-dehydroquinate dehydratase 1396470:1397228 reverse MW:27325	27308	0	0	0.0001364	0.000129057	0	0	0
SL1344_1299	ydiJ	SL1344_1299 conserved hypothetical FAD-binding protein 1403356:1406412 forward MW:113134	113061	0	0	0	0	0	0	0
SL1344_1300	0	SL1344_1300 conserved hypothetical protein 1406409:1406819 forward MW:14869	14860	0	0	0	0	0	0	0
SL1344_1301	ydiH	SL1344_1301 conserved hypothetical protein 1406918:1407106 forward MW:7296	7292	0	0	0	0	0	0	0
SL1344_1304	sufB	SL1344_1304 conserved hypothetical protein 1409544:1411031 forward MW:54789	54755	0	0	0	0	0	-5.39232	-5.39232
SL1344_1305	sufC	SL1344_1305 hypothetical ABC transport ATP-binding subunit 1411048:1411794 forward MW:27685	27668	0	0	0	4.18912e-06	0	-6.40939	-6.40939
SL1344_1307	sufS	SL1344_1307 hypothetical amintransferase 1413037:1414257 forward MW:44504	44476	0	0	0	8.46715e-06	0	-5.32193	-5.32193
SL1344_1308	ynhA	SL1344_1308 conserved hypothetical protein 1414270:1414686 forward MW:15760	15750	0	0	0	3.96983e-06	0	0	0
SL1344_1309	ynhG	SL1344_1309 hypothetical exported protein 1414841:1415842 forward MW:36129	36107	0	0	0	0	-8.37938	-5.35755	3.02183
SL1344_1310	lppB	SL1344_1310 major outer membrane lipoprotein 1415909:1416148 reverse MW:8491	8486	0	0	3.32833e-05	4.14364e-06	0	-8.24793	-8.24793
SL1344_1311	lpp	SL1344_1311 major outer membrane lipoprotein 1416231:1416467 reverse MW:8391	8386	0	0	0	3.04059e-05	1.62837	-0.476053	-2.10443
SL1344_1312	pykF	SL1344_1312 pyruvate kinase 1416778:1418136 reverse MW:48653	48622	0.00099101	0.00114703	0.000371049	0.00159541	-5.7355	-6.10706	-0.371568
SL1344_1315	orf245	SL1344_1315 hypothetical protein 1420909:1421646 reverse MW:27430	27413	0	4.31214e-06	0.000229078	0.000296353	0	0	0
SL1344_1321	ttrR	SL1344_1321 hypothetical two-component response regulator 1429936:1430574 forward MW:23268	23253	0	0	0	0	0	0	0
SL1344_1322	orf70	SL1344_1322 conserved hypothetical protein 1430672:1430884 forward MW:7947	7942	0	0	0	0	0	0	0
SL1344_1323	orf319	SL1344_1323 hypothetical pathogenicity island protein 1430980:1431939 reverse MW:36459	36436	0	0	0	0	0	0	0
SL1344_1325	ssrB	SL1344_1325 two-component response regulator 1433019:1433657 reverse MW:24354	24339	0	0	0	0	0	0	0
SL1344_1331	sseA	SL1344_1331 Type III secretion system chaperone protein 1440510:1440779 forward MW:10128	10123	0	0	0	0	4.16993	-3.2647	-7.43463
SL1344_1333	sscA	SL1344_1333 Type III secretion system chaperone protein 1441373:1441846 forward MW:18135	18123	0	1.84409e-06	0	1.72967e-05	-8.3837	0	8.3837
SL1344_1348	ssaV	SL1344_1348 Type III secretion system apparatus 1450508:1452553 forward MW:75323	75274	0	0	3.34114e-05	0	0	0	0
SL1344_1349	ssaN	SL1344_1349 Type III secretion ATP synthase 1452543:1453844 forward MW:47822	47792	0	0	0	0	0	-5.42626	-5.42626
SL1344_1357	norM	SL1344_1357 Probable multidrug resistance protein norM 1458814:1460187 reverse MW:49426	49394	0	0	0	4.26581e-06	0	0	0
SL1344_1358	ribE	SL1344_1358 riboflavin synthase alpha chain 1460404:1461045 forward MW:23392	23377	0	0	0	0	-5.43879	-1.39232	4.04647
SL1344_1359	cfa	SL1344_1359 cyclopropane-fatty-acyl-phospholipid synthase 1461087:1462235 reverse MW:43937	43909	0	1.62497e-06	6.94351e-05	4.17316e-06	0	0	0
SL1344_1362	purR	SL1344_1362 purine nucleotide synthesis repressor 1464772:1465797 reverse MW:38048	38024	0	0	0	0	0	-7.03342	-7.03342
SL1344_1363	sodB	SL1344_1363 superoxide dismutase 1466265:1466846 reverse MW:21335	21323	0	0	0	1.30909e-05	4	4	0
SL1344_1365	ydhD	SL1344_1365 conserved hypothetical protein 1468129:1468476 forward MW:12907	12900	0	1.63552e-06	0	0	0	-6.55459	-6.55459
SL1344_1366	rnt	SL1344_1366 ribonuclease T 1468554:1469201 reverse MW:23535	23520	0	0	0	9.37589e-06	0	0	0
SL1344_1367	gloA	SL1344_1367 lactoylglutathione lyase 1469302:1469709 reverse MW:14821	14812	0	0	0	0	0	-5.39232	-5.39232
SL1344_1368	nemA	SL1344_1368 N-ethylmaleimide reductase 1469778:1470875 reverse MW:39479	39455	0	0	0	4.15513e-06	0	-8.74147	-8.74147
SL1344_1369	ydhM	SL1344_1369 hypothetical TetR-family transcriptional regulator 1470934:1471533 reverse MW:22248	22234	0	0	0	4.27631e-05	0	0	0
SL1344_1371	ydhF	SL1344_1371 hypothetical oxidoreductase 1471926:1472822 forward MW:33681	33659	0	0	0	0	0	0	0
SL1344_1372	sodC	SL1344_1372 copper-zinc superoxide dismutase 1472902:1473423 forward MW:17737	17726	0	0	0	0	0	0	0
SL1344_1374	ydhJ	SL1344_1374 hypothetical HlyD-family protein 1475438:1476334 reverse MW:33023	33003	0	0	0	0	0	0	0
SL1344_1376	slyA	SL1344_1376 Transcriptional regulator slyA. 1476732:1477172 forward MW:16703	16693	0	0	0	0	-4.71425	-1.71621	2.99804
SL1344_1377	slyB	SL1344_1377 outer membrane lipoprotein SlyB precursor 1477220:1477687 reverse MW:15547	15538	0	2.80086e-06	7.35183e-05	9.15273e-06	-4.12568	-4.95012	-0.824447
SL1344_1378	anmK	SL1344_1378 conserved hypothetical protein 1477959:1479080 forward MW:39736	39710	0	1.02793e-05	0.000179832	0.00031839	0	0	0
SL1344_1379	mliC	SL1344_1379 lipoprotein 1479168:1479497 forward MW:12558	12550	0	0	0	0	0	0	0
SL1344_1380	pdxH	SL1344_1380 pyridoxamine 5~-phosphate oxidase 1479556:1480212 forward MW:25499	25483	0	0	0	0	0	0	0
SL1344_1381	tyrS	SL1344_1381 tyrosyl-tRNA synthetase 1480339:1481613 forward MW:47282	47252	0	0	0	0	-4.40514	-5.78136	-1.37622
SL1344_1382	pdxY	SL1344_1382 pyridoxamine kinase (ec 2.7.1.35) (pm kinase) 1481673:1482533 forward MW:31113	31093	0	1.58565e-06	3.38774e-05	8.79673e-05	0	-7.07682	-7.07682
SL1344_1383	gst	SL1344_1383 glutathione S-transferase 1482592:1483197 reverse MW:22443	22429	0	0	0	1.348e-05	-8.33092	0	8.33092
SL1344_1384	tppB	SL1344_1384 hypothetical proton/oligopeptide symporter 1483302:1484807 reverse MW:54340	54303	0	0	3.21611e-05	0	0	0	0
SL1344_1385	nth	SL1344_1385 endonuclease III 1485409:1486044 reverse MW:23528	23513	0	0	0	0	0	0	0
SL1344_1386	rnfE	SL1344_1386 Electron transport complex protein rnfE 1486044:1486736 reverse MW:24318	24302	0	0	0	0	0	0	0
SL1344_1387	rnfG	SL1344_1387 Electron transport complex protein rnfG 1486739:1487359 reverse MW:22238	22224	0	0	0	0	0	0	0
SL1344_1389	rnfC	SL1344_1389 Electron transport complex protein rnfC 1488422:1490629 reverse MW:78698	78649	0	0	0	0	0	-5.32193	-5.32193
SL1344_1390	rnfB	SL1344_1390 Electron transport complex protein rnfB 1490622:1491200 reverse MW:20659	20645	0	0	0	4.01145e-06	0	0	0
SL1344_1394	ydgJ	SL1344_1394 hypothetical oxidoreductase 1493233:1494273 forward MW:38407	38383	0	0	0	0	-8.29921	-8.97728	-0.678072
SL1344_1395	add	SL1344_1395 Adenosine deaminase 1494348:1495349 reverse MW:36236	36214	0	0	3.145e-05	5.04109e-05	-9.3837	-7.06609	2.31762
SL1344_1396	ydgA	SL1344_1396 conserved hypothetical protein 1496053:1497561 reverse MW:54284	54250	0	0	6.67639e-05	1.33913e-05	0	-8.11374	-8.11374
SL1344_1397	manA	SL1344_1397 mannose-6-phosphate isomerase 1497664:1498839 reverse MW:42591	42564	0	0	0	2.76699e-05	-9.35315	-9.13955	0.213595
SL1344_1398	fumA	SL1344_1398 Fumarate hydratase class I, aerobic 1499039:1500685 forward MW:60259	60221	0	0	6.53922e-05	5.64448e-05	-8.26679	-8.10852	0.158262
SL1344_1400	fumC	SL1344_1400 Fumarate hydratase class II 1500853:1502256 forward MW:50303	50271	0	0	3.08397e-05	2.76438e-05	0	-6.37504	-6.37504
SL1344_1401	tus	SL1344_1401 DNA replication terminus site-binding protein 1502253:1503182 reverse MW:35487	35465	0	0	0	8.33314e-06	0	0	0
SL1344_1405	rstA	SL1344_1405 hypothetical two-component response regulator 1508142:1508873 reverse MW:27202	27185	0	0	0	0	0	0	0
SL1344_1408	ydgH	SL1344_1408 hypothetical exported protein 1511078:1512022 reverse MW:33915	33894	0	0	0	0	-5.47805	-7.61261	-2.13456
SL1344_1409	pntA	SL1344_1409 pyridine nucleotide transhydrogenase subunit-alpha 1512549:1514078 forward MW:54266	54231	0	7.31179e-07	3.12434e-05	0.000137003	0	-6.9542	-6.9542
SL1344_1410	pntB	SL1344_1410 pyridine nucleotide transhydrogenase subunit-beta 1514089:1515477 forward MW:48869	48838	0	0	0	1.24471e-05	-9.3443	-8.66178	0.682518
SL1344_1418	mlc	SL1344_1418 hypothetical regulatory protein 1521955:1523175 forward MW:44225	44197	0	0	6.5027e-05	4.0478e-05	0	0	0
SL1344_1419	bioD	SL1344_1419 Dethiobiotin synthetase 1523301:1523996 forward MW:24782	24766	0	0	0	0	0	0	0
SL1344_1425	ynfI	SL1344_1425 conserved hypothetical protein 1529128:1529742 reverse MW:23480	23466	0	0	0	0	0	0	0
SL1344_1427	0	SL1344_1427 hypothetical anaerobic dimethyl sulfoxide reductase 1530644:1531261 reverse MW:22765	22751	0	0	0	0	0	0	0
SL1344_1428	dmsA2	SL1344_1428 hypothetical dimethyl sulphoxide reductase subunit 1531272:1533707 reverse MW:89774	89717	0	0	0	0	0	0	0
SL1344_1429	dmsA1	SL1344_1429 hypothetical dimethyl sulphoxide reductase subunit 1533806:1536247 reverse MW:90116	90058	0	0	0	0	0	0	0
SL1344_1430	ynfD	SL1344_1430 hypothetical exported protein 1536401:1536709 reverse MW:10574	10568	0	0	0	0	0	0	0
SL1344_1431	ynfC	SL1344_1431 conserved hypothetical protein 1536804:1537523 forward MW:26571	26554	0	0	0	0	0	0	0
SL1344_1432	speG	SL1344_1432 spermidine N1-acetyltransferase 1537564:1538124 reverse MW:22052	22038	0	0	0	0	0	0	0
SL1344_1433	ynfB	SL1344_1433 hypothetical secreted protein 1538160:1538501 reverse MW:12846	12838	0	0	0	0	0	0	0
SL1344_1436	rspB	SL1344_1436 starvation sensing protein RspB 1540327:1541346 forward MW:36914	36891	0	0	0	0	0	0	0
SL1344_1438	ydfI	SL1344_1438 hypothetical D-mannonate oxidoreductase 1542923:1544389 forward MW:53897	53862	0	0	0	0	0	-6.35755	-6.35755
SL1344_1439	ydfZ	SL1344_1439 conserved hypothetical protein 1544456:1544659 reverse MW:7222	7218	0	0	0	8.2416e-06	0	-5.42626	-5.42626
SL1344_1440	ydfH	SL1344_1440 hypothetical regulatory protein 1544840:1545526 reverse MW:26303	26286	0	0	0	4.32576e-06	0	0	0
SL1344_1441	ydfG	SL1344_1441 hypothetical oxidoreductase 1545656:1546402 reverse MW:27043	27026	0	0	0	0	-4.37504	-4.9542	-0.579157
SL1344_1442	dcp	SL1344_1442 dipeptidyl carboxypeptidase II 1546541:1548583 forward MW:77261	77212	0	1.6195e-06	3.32166e-05	4.96241e-05	0	-7.76155	-7.76155
SL1344_1444	ydeJ	SL1344_1444 conserved hypothetical protein 1549230:1549757 reverse MW:18911	18899	0	0	0	2.16599e-05	0	0	0
SL1344_1445	ydeI	SL1344_1445 hypothetical periplasmic protein 1550184:1550576 forward MW:14385	14376	0	0	0	0	0	0	0
SL1344_1453	yneJ	SL1344_1453 hypothetical regulatory protein 1557061:1557933 reverse MW:31984	31963	0	0	0	0	0	0	0
SL1344_1454	yneI	SL1344_1454 hypothetical oxidoreductase 1558036:1559424 forward MW:48966	48935	0	0	0	0	0	0	0
SL1344_1456	yneG	SL1344_1456 conserved hypothetical protein 1560423:1560782 forward MW:13638	13630	0	0	0	0	0	0	0
SL1344_1458	0	SL1344_1458 hypothetical exported protein 1562009:1562551 reverse MW:19735	19723	0	0	0	0	0	0	0
SL1344_1459	0	SL1344_1459 outer membrane protein 1563370:1564386 forward MW:37347	37323	0	0	0	0	0	0	0
SL1344_1462	hyaF2	SL1344_1462 hydrogenase-1 operon protein HyaF2 1565756:1566817 reverse MW:39501	39476	0	0	0	0	0	0	0
SL1344_1463	hyaE2	SL1344_1463 hydrogenase-1 operon protein HyaE2 1566835:1567245 reverse MW:15270	15261	0	0	0	0	0	0	0
SL1344_1465	hyaD2	SL1344_1465 hydrogenase 1 maturation protease 1567541:1568149 reverse MW:22145	22131	0	0	0	0	0	0	0
SL1344_1467	hyaB2	SL1344_1467 uptake hydrogenase-1 large subunit 1568849:1570651 reverse MW:66846	66804	0	0	0	0	0	-7	-7
SL1344_1469	0	SL1344_1469 hypothetical secreted hydrolase 1572186:1573277 forward MW:40272	40246	0	0	0	1.27774e-05	-4.45943	-3.58496	0.874469
SL1344_1470	0	SL1344_1470 hypothetical regulatory protein 1573443:1574114 forward MW:25347	25331	0	1.54348e-06	3.29765e-05	1.79613e-05	0	0	0
SL1344_1471	0	SL1344_1471 hypothetical alcohol dehydrogenase 1574173:1575198 reverse MW:37247	37223	0	0	0	0	0	-7.88874	-7.88874
SL1344_1476	0	SL1344_1476 hypothetical regulatory protein 1581046:1581534 forward MW:18280	18269	0	0	0	2.37317e-05	0	0	0
SL1344_1477	0	SL1344_1477 hypothetical isomerase 1581727:1582806 forward MW:41197	41171	0	0	0	0	-4.3966	-3.47573	0.920871
SL1344_1478	0	SL1344_1478 conserved hypothetical protein 1582858:1583247 reverse MW:14336	14327	0	1.57895e-06	3.37345e-05	1.78492e-05	0	0	0
SL1344_1479	0	SL1344_1479 plasmid stability protein 1583418:1583702 reverse MW:11076	11069	0	0	0	0	0	0	0
SL1344_1480	0	SL1344_1480 plasmid stability protein 1583692:1583940 reverse MW:9090	9085	0	0	0	0	0	0	0
SL1344_1484	0	SL1344_1484 conserved hypothetical protein 1587258:1588724 reverse MW:55726	55691	0	0	0	0	0	-5.42626	-5.42626
SL1344_1485	0	SL1344_1485 hypothetical LacI-family transcriptional regulator 1588983:1589990 forward MW:37250	37226	0	0	0	4.26073e-06	0	0	0
SL1344_1488	glgX	SL1344_1488 glycogen debranching protein 1592913:1594988 reverse MW:78543	78494	0	0	0	0	0	-5.32193	-5.32193
SL1344_1489	0	SL1344_1489 hypothetical hydrolase 1595045:1597573 reverse MW:95029	94970	0	0	0	4.00354e-06	0	0	0
SL1344_1490	0	SL1344_1490 hypothetical hydrolase 1597570:1599354 reverse MW:65774	65733	0	0	0	0	-9.39446	-6.39232	3.00215
SL1344_1491	0	SL1344_1491 hypothetical exported protein 1599483:1600268 reverse MW:28863	28845	0	0	6.73249e-05	8.38169e-06	0	0	0
SL1344_1492	hdeB	SL1344_1492 hypothetical secreted protein 1600411:1600740 reverse MW:11872	11865	0	0	0	0	0	0	0
SL1344_1493	osmC	SL1344_1493 osmotically inducible protein C 1601090:1601521 reverse MW:15102	15093	0	0	0	0	0	-6.52356	-6.52356
SL1344_1495	rpsV	SL1344_1495 30S ribosomal protein S22 1602344:1602487 forward MW:5369	5366	0	0	0	9.23772e-06	-5.42626	0.0324215	5.45869
SL1344_1496	sfcA	SL1344_1496 NAD-linked malic enzyme; malate oxidoreductase 1602664:1604361 forward MW:62896	62856	0	4.52743e-06	0.000193458	4.44746e-06	0	-7	-7
SL1344_1497	adhP	SL1344_1497 alcohol dehydrogenase 1604728:1605657 forward MW:32546	32526	0	0	0	1.28237e-05	-4.37938	-3.93664	0.44274
SL1344_1498	fdnI	SL1344_1498 formate dehydrogenase, nitrate-inducible, cytochrome b556(fdn) subunit (formate dehydrogenase-n gamma subunit) (fdh-n gamma subunit) (anaerobic formate dehydrogenase cytochrome b556 subunit) 1605748:1606389 reverse MW:24968	24951	0	1.55926e-06	3.33137e-05	2.44698e-05	0	0	0
SL1344_1499	fdnH	SL1344_1499 formate dehydrogenase, nitrate-inducible, iron-sulfur subunit (formate dehydrogenase-n beta subunit) (fdh-n beta subunit) (anaerobic formate dehydrogenase iron-sulfur subunit) 1606397:1607281 reverse MW:32314	32293	0	0	0	0	0	0	0
SL1344_1500	fdnG	SL1344_1500 formate dehydrogenase N (nitrate-inducible, alpha subunit) 1607295:1610342 reverse MW:112768	112696	0	0	0	0	0	-7.42626	-7.42626
SL1344_1503	ompD	SL1344_1503 Outer membrane protein 1611987:1613114 forward MW:41296	41271	0	0	0	1.7244e-05	-4.40088	-9.53783	-5.13695
SL1344_1504	0	SL1344_1504 conserved hypothetical protein 1613198:1613638 forward MW:16696	16685	0	1.58279e-06	3.38164e-05	0.00118933	0	0	0
SL1344_1508	narZ	SL1344_1508 respiratory nitrate reductase 2 alpha chain 1617540:1621280 forward MW:140116	140026	0	0	0	0	0	0	0
SL1344_1512	yddE	SL1344_1512 conserved hypothetical protein 1624299:1625192 forward MW:32151	32131	0	0	0	0	0	0	0
SL1344_1513	nhoA	SL1344_1513 N-hydroxyarylamine O-acetyltransferase 1625228:1626073 reverse MW:32178	32157	0	0	0	0	0	0	0
SL1344_1517	0	SL1344_1517 possible ATP-binding protein 1629438:1630499 reverse MW:38504	38480	0	0	0	0	0	-11.9495	-11.9495
SL1344_1519	yncC	SL1344_1519 hypothetical regulatory protein 1632950:1633615 reverse MW:24796	24780	0	0	0	0.000395474	0	0	0
SL1344_1520	yncB	SL1344_1520 hypothetical NADP-dependent oxidoreductase 1633949:1634986 reverse MW:37762	37738	0	0	0	0	-8.27146	-5.24793	3.02354
SL1344_1521	yncA	SL1344_1521 hypothetical acetyltransferase 1635198:1635713 forward MW:19187	19176	0	0	3.09216e-05	3.84961e-06	0	0	0
SL1344_1524	srfA	SL1344_1524 virulence protein 1636624:1637943 forward MW:47342	47313	0	0	0	0	0	0	0
SL1344_1525	srfB	SL1344_1525 virulence protein 1637948:1640929 forward MW:110912	110842	0	0	0	0	0	0	0
SL1344_1526	srfC	SL1344_1526 virulence protein 1640926:1643070 forward MW:79532	79482	0	0	0	0	0	0	0
SL1344_1528	ydcW	SL1344_1528 hypothetical aldehyde dehydrogenase 1643687:1645132 reverse MW:52038	52004	0	0	0	0	2.80735	-4.16993	-6.97728
SL1344_1529	ydcR	SL1344_1529 hypothetical regulatory protein 1645247:1646671 reverse MW:53172	53139	0	7.47905e-07	0	1.25991e-05	0	-6.33985	-6.33985
SL1344_1530	pdgL	SL1344_1530 D-alanyl-D-alanine dipeptidase 1646807:1647577 reverse MW:28996	28978	0	0	0	8.13098e-06	-5.40022	-2.39759	3.00263
SL1344_1534	ydcP	SL1344_1534 hypothetical peptidase 1650489:1652453 reverse MW:73058	73011	0	2.56997e-06	0.000109815	1.36716e-05	0	0	0
SL1344_1535	ydcN	SL1344_1535 hypothetical DNA-binding protein 1652532:1653068 reverse MW:19804	19792	0	0	0	0	0	0	0
SL1344_1537	0	SL1344_1537 hypothetical lipoprotein 1654391:1655059 reverse MW:24439	24424	0	0	0	0	3	3	0
SL1344_1538	tehB	SL1344_1538 tellurite resistance protein TehB 1655215:1655811 reverse MW:22144	22130	0	7.61059e-07	0	0	0	0	0
SL1344_1541	rimL	SL1344_1541 ribosomal-protein-serine acetyltransferase 1657895:1658434 reverse MW:20605	20592	0	0	0	0	0	0	0
SL1344_1549	aac	SL1344_1549 aminoglycoside 6~-N-acetyltransferase 1664211:1664648 forward MW:16375	16365	0	0	0	0	0	0	0
SL1344_1552	ydcG	SL1344_1552 glucan biosynthesis protein D 1666680:1668335 reverse MW:62227	62187	0	0	0	0	0	-8.57365	-8.57365
SL1344_1553	0	SL1344_1553 hypothetical esterase 1668555:1670063 reverse MW:55708	55672	0	0	0	3.80618e-05	0	0	0
SL1344_1554	0	SL1344_1554 conserved hypothetical protein 1670112:1671455 reverse MW:50965	50933	0	0	0	0	0	0	0
SL1344_1555	ydcI	SL1344_1555 hypothetical LysR-family transcriptional regulatory protein 1671748:1672671 forward MW:33085	33065	0	0	0	0	0	0	0
SL1344_1556	trg	SL1344_1556 methyl-accepting chemotaxis protein III (mcp-iii) (ribose and galactose chemoreceptor protein) 1672732:1674357 reverse MW:58303	58267	0	0	0	0	0	0	0
SL1344_1557	adhC	SL1344_1557 alcohol dehydrogenase class III (ec 1.1.1.1) (glutathione-dependent formaldehyde dehydrogenase) (ec 1.2.1.1) (fdh) (faldh) 1674526:1675644 reverse MW:39255	39230	0	0	0	0	0	-7.02237	-7.02237
SL1344_1558	0	SL1344_1558 conserved hypothetical protein 1675676:1675951 reverse MW:10186	10179	0	0	0	1.30059e-05	0	0	0
SL1344_1563	0	SL1344_1563 hypothetical periplasmic amino acid-binding protein 1680744:1681505 forward MW:28439	28420	0	0	0	0	-6.64179	2.80735	9.44915
SL1344_1568	0	SL1344_1568 possible methyltransferase 1685743:1686405 forward MW:24369	24353	0	7.49333e-07	6.98599e-05	0	0	0	0
SL1344_1569	cybB	SL1344_1569 cytochrome b561 (cytochrome b-561) 1686676:1687206 reverse MW:20268	20255	0	0	0	0	0	0	0
SL1344_1570	ydcF	SL1344_1570 conserved hypothetical protein 1687323:1688123 reverse MW:29486	29468	0	0	0	0	0	-5.35755	-5.35755
SL1344_1571	hrpA	SL1344_1571 ATP-dependent helicase HrpA 1688187:1692089 reverse MW:148644	148550	0	0	0	4.13325e-06	0	0	0
SL1344_1572	acpD	SL1344_1572 Acyl carrier protein phosphodiesterase 1692290:1692895 forward MW:21628	21614	0	0	0	0	0	0	0
SL1344_1575	ynbE	SL1344_1575 hypothetical lipoprotein 1693815:1694006 reverse MW:7051	7047	0	0	0	0	0	0	0
SL1344_1576	ydbH	SL1344_1576 hypothetical exported protein 1694006:1696642 reverse MW:96619	96558	0	0	0	0	0	0	0
SL1344_1577	ldhA	SL1344_1577 D-lactate dehydrogenase 1696882:1697871 forward MW:36417	36393	0	0	0	0	-8.38802	-7.02237	1.36565
SL1344_1578	hslJ	SL1344_1578 heat shock protein (hslJ) 1697982:1698392 forward MW:14667	14657	0	0	3.35469e-05	1.29934e-05	0	0	0
SL1344_1581	nifJ	SL1344_1581 probable pyruvate-flavodoxin oxidoreductase 1698978:1702502 forward MW:128580	128498	0	0	0	0	-9.36194	0	9.36194
SL1344_1582	ynaF	SL1344_1582 conserved hypothetical protein 1702984:1703418 forward MW:15714	15704	0	0	6.5805e-05	0	-5.44392	-5.36581	0.0781108
SL1344_1585	ydaO	SL1344_1585 conserved hypothetical protein 1704162:1705097 forward MW:35358	35335	0	1.73152e-06	7.39879e-05	7.00852e-05	0	0	0
SL1344_1589	ydaL	SL1344_1589 conserved hypothetical protein 1709695:1710258 reverse MW:21641	21627	0	0	0	0	0	0	0
SL1344_1591	fnr	SL1344_1591 fumarate and nitrate reduction regulatory protein 1711227:1711979 forward MW:27883	27865	0	0	0	0	0	-6.40939	-6.40939
SL1344_1592	ydaA	SL1344_1592 conserved hypothetical protein 1712130:1713077 forward MW:35639	35616	0	0	0	8.52743e-06	0	-6.42626	-6.42626
SL1344_1594	ynaI	SL1344_1594 hypothetical membrane protein 1713625:1714656 forward MW:38750	38725	0	0	0	8.62873e-06	0	0	0
SL1344_1596	0	SL1344_1596 conserved hypothetical protein 1715388:1716074 forward MW:24804	24789	0	0	0	0	0	0	0
SL1344_1602	0	SL1344_1602 hypothetical protein 1722495:1723607 forward MW:41570	41544	0	0	0	0	-8.40939	-7.49185	0.917538
SL1344_1605	0	SL1344_1605 hypothetical oxidoreductase 1724854:1725567 forward MW:24887	24872	0	0	3.40401e-05	1.80109e-05	0	0	0
SL1344_1606	0	SL1344_1606 hypothetical oxidoreductase 1725658:1726527 reverse MW:32407	32386	0	0	0	0	0	0	0
SL1344_1609	mppA	SL1344_1609 periplasmic murein peptide-binding protein MppA 1728851:1730464 reverse MW:59877	59840	0	0	0	0	0	-8.35755	-8.35755
SL1344_1611	ycjG	SL1344_1611 hypothetical mandelate racemase / muconate lactonizing enzyme family protein 1731357:1732322 reverse MW:34678	34656	0	0	0	3.28101e-05	0	0	0
SL1344_1612	tpx	SL1344_1612 Probable thiol peroxidase 1732438:1732944 forward MW:18025	18014	0	0	0	0	-4.16993	-1.87774	2.29218
SL1344_1613	tyrR	SL1344_1613 transcriptional regulatory protein TyrR 1733034:1734575 reverse MW:57680	57644	0	4.01561e-06	7.1956e-05	1.47007e-05	0	-6.33985	-6.33985
SL1344_1614	ycjF	SL1344_1614 hypothetical membrane protein 1734723:1735784 reverse MW:39226	39202	0	0	0	8.08528e-06	0	0	0
SL1344_1615	ycjX	SL1344_1615 hypothetical ATP-binding protein 1735781:1737184 reverse MW:52756	52722	0	0	0	0	0	0	0
SL1344_1616	pspE	SL1344_1616 bacteriophage shock protein E precursor 1737327:1737641 reverse MW:11882	11874	0	0	0	0	0	0	0
SL1344_1619	pspB	SL1344_1619 bacteriophage shock protein B 1738317:1738541 reverse MW:8817	8812	0	0	0	0	0	-5.42626	-5.42626
SL1344_1620	pspA	SL1344_1620 bacteriophage shock protein A 1738601:1739269 reverse MW:25524	25508	0	0	0	4.26979e-06	0	0	0
SL1344_1621	pspF	SL1344_1621 psp operon transcriptional activator PspF 1739440:1740420 forward MW:36828	36804	0	0	0	0	0	0	0
SL1344_1622	sapA	SL1344_1622 peptide transport periplasmic protein SapA precursor 1740532:1742181 forward MW:61651	61613	0	0	0	0	0	0	0
SL1344_1623	sapB	SL1344_1623 peptide transport system permease protein SapB 1742349:1743143 forward MW:29411	29392	0	0	0	0	0	0	0
SL1344_1625	sapD	SL1344_1625 peptide transport system ATP-binding protein SapD 1744020:1745012 forward MW:37572	37547	0	0	0	0	0	0	0
SL1344_1626	sapF	SL1344_1626 peptide transport system ATP-binding protein SapF 1745014:1745820 forward MW:30672	30652	0	0	0	0	0	0	0
SL1344_1628	steC	SL1344_1628 Type III secretion system effector protein, has Kinase activity and aids formation of F-actin meshwork 1747010:1748383 reverse MW:52302	52269	0	0	0	0	0	-5.32193	-5.32193
SL1344_1631	fabI	SL1344_1631 enoyl-[acyl-carrier-protein] reductase (NADH) 1748989:1749777 forward MW:27761	27743	0	0	0	3.99893e-06	-2.70506	-4.90989	-2.20484
SL1344_1633	rnb	SL1344_1633 Exoribonuclease II 1751199:1753133 forward MW:72440	72394	0	4.78789e-06	3.12564e-05	0.000144332	0	-9.09011	-9.09011
SL1344_1636	yciT	SL1344_1636 hypothetical regulatory protein 1755765:1756517 forward MW:27477	27460	0	0	0	5.44631e-05	0	0	0
SL1344_1638	yciH	SL1344_1638 hypothetical translation initiaiton factor 1757114:1757440 reverse MW:11526	11519	0	0	0	0	0	-6.56986	-6.56986
SL1344_1639	pyrF	SL1344_1639 Orotidine 5~-phosphate decarboxylase 1757440:1758177 reverse MW:26328	26311	0	0	0	9.5472e-06	0	0	0
SL1344_1640	yciM	SL1344_1640 conserved hypothetical protein 1758368:1759483 reverse MW:42499	42471	0	0	0	0	0	0	0
SL1344_1641	yciS	SL1344_1641 conserved hypothetical protein 1759544:1759852 reverse MW:11385	11378	0	0	0	0	-8.40088	-5.39232	3.00856
SL1344_1642	pgpB	SL1344_1642 phosphatidylglycerophosphatase B 1760002:1760766 reverse MW:29245	29226	0	0	3.37953e-05	4.20738e-06	0	0	0
SL1344_1643	ribA	SL1344_1643 GTP cyclohydrolase II 1760962:1761552 forward MW:21635	21621	0	0	0	0	0	0	0
SL1344_1644	acnA	SL1344_1644 aconitate hydratase 1 (citrate hydro-lyase 1) 1761608:1764283 reverse MW:97503	97440	0	0	0	0	-10.341	-8.84549	1.49547
SL1344_1645	cysB	SL1344_1645 cys regulon transcriptional activator 1765260:1766234 reverse MW:36013	35991	0	0	0.00012974	4.59713e-05	0	-5.35755	-5.35755
SL1344_1646	topA	SL1344_1646 DNA topoisomerase I, omega protein I 1766645:1769242 reverse MW:97303	97241	0	0	0	4.13033e-06	0	-9.43879	-9.43879
SL1344_1647	yciN	SL1344_1647 conserved hypothetical protein 1769645:1769896 forward MW:9393	9388	0	0	0	6.94361e-05	0	-5.39232	-5.39232
SL1344_1648	sohB	SL1344_1648 hypothetical protease 1769938:1770984 reverse MW:38965	38941	0	0	0	4.18976e-06	0	-7.52356	-7.52356
SL1344_1649	yciK	SL1344_1649 hypothetical oxidoreductase 1771222:1771983 forward MW:28073	28055	0	0	0	1.8372e-05	0	0	0
SL1344_1650	btuR	SL1344_1650 COB(I) alamin adenosyltransferase 1771980:1772570 forward MW:21726	21712	0	0	0	0	0	0	0
SL1344_1651	yciL	SL1344_1651 hypothetical pseudouridine synthase 1772657:1773532 reverse MW:32612	32592	0	0	0	0	0	-5.39232	-5.39232
SL1344_1652	yciO	SL1344_1652 conserved hypothetical protein 1773633:1774253 reverse MW:23106	23092	0	0	0	4.15584e-06	0	0	0
SL1344_1653	trpH	SL1344_1653 conserved hypothetical protein 1774261:1775142 reverse MW:32396	32376	0	0	0	0	0	0	0
SL1344_1656	trpC	SL1344_1656 Indole-3-glycerol phosphate synthase 1778564:1779922 forward MW:49202	49171	0	0	0	0	0	-5.24793	-5.24793
SL1344_1657	trpB	SL1344_1657 tryptophan synthase beta chain 1779932:1781125 forward MW:42928	42901	0	0	0	3.76191e-06	0	0	0
SL1344_1658	trpA	SL1344_1658 Tryptophan synthase alpha chain 1781125:1781931 forward MW:28671	28653	0	0	0	0	0	-5.32193	-5.32193
SL1344_1660	yciF	SL1344_1660 conserved hypothetical protein 1782683:1783186 forward MW:18652	18641	0	0	0	4.01893e-06	0	0	0
SL1344_1661	yciE	SL1344_1661 conserved hypothetical protein 1783260:1783766 forward MW:18972	18960	0	0	0	0	0	0	0
SL1344_1662	katN	SL1344_1662 catalase 1783786:1784664 forward MW:31847	31827	0	0	0	0	0	0	0
SL1344_1663	ompW	SL1344_1663 hypothetical outer membrane protein 1784746:1785384 reverse MW:22957	22943	0	0	0	0	0	-5.35755	-5.35755
SL1344_1665	yciC	SL1344_1665 hypothetical membrane protein 1786152:1786895 forward MW:26371	26354	0	0	0	4.09568e-06	0	0	0
SL1344_1667	yciA	SL1344_1667 hypothetical acyl-coA hydrolase 1787652:1788053 forward MW:14363	14354	0	0	0	0	0	0	0
SL1344_1669	yciI	SL1344_1669 conserved hypothetical protein 1789065:1789361 forward MW:10594	10587	0	0	0	0	0	-8.05528	-8.05528
SL1344_1670	cls	SL1344_1670 Cardiolipin synthetase 1789721:1791181 forward MW:54734	54698	0	0	0	2.65942e-05	0	0	0
SL1344_1671	yciU	SL1344_1671 conserved hypothetical protein 1791215:1791544 forward MW:12743	12735	0	0	0	0	0	0	0
SL1344_1673	oppF	SL1344_1673 oligopeptide transport ATP-binding protein (OppF) 1792476:1793480 reverse MW:37255	37231	0	0	0	0	0	-5.24793	-5.24793
SL1344_1674	oppD	SL1344_1674 oligopeptide transport ATP-binding protein (OppD) 1793477:1794484 reverse MW:36864	36840	0	0	0	3.79789e-06	0	0	0
SL1344_1676	oppB	SL1344_1676 oligopeptide transport system permease protein (OppB) 1795419:1796339 reverse MW:33420	33398	0	0	0	0	0	0	0
SL1344_1677	oppA	SL1344_1677 periplasmic oligopeptide-binding protein precursor (OppA) 1796461:1798092 reverse MW:61292	61254	0	0	0	0	-8.29462	-11.115	-2.82042
SL1344_1680	adh	SL1344_1680 alcohol dehydrogenase 1799981:1802659 forward MW:96216	96155	0	0	3.13687e-05	0.00022182	-11.014	-12.2955	-1.28146
SL1344_1681	tdk	SL1344_1681 Thymidine kinase 1802856:1803473 reverse MW:23404	23390	0	0	0.000206816	0.000502694	0	0	0
SL1344_1682	hns	SL1344_1682 DNA-binding protein (histone-like protein Hlp-II) 1804136:1804549 forward MW:15542	15533	0	0	0	0	-7.36734	-10.7659	-3.39858
SL1344_1683	galU	SL1344_1683 glucose-1-phosphate uridylyltransferase 1804681:1805589 reverse MW:32906	32885	0.000405765	1.0276e-05	0.00170069	0.017935	-6.07414	-3.53138	2.54276
SL1344_1684	hnr	SL1344_1684 hypothetical regulatory protein 1805792:1806805 reverse MW:37208	37184	0	1.57647e-06	0.000107781	1.84501e-05	0	0	0
SL1344_1685	ychK	SL1344_1685 conserved hypothetical protein 1806896:1807801 reverse MW:33093	33072	0	0	0	0	0	0	0
SL1344_1687	purU	SL1344_1687 formyltetrahydrofolate deformylase 1808421:1809263 forward MW:31830	31809	0	0	0	0	0	-7.54689	-7.54689
SL1344_1689	narI	SL1344_1689 respiratory nitrate reductase 1 gamma chain 1812350:1813027 reverse MW:25320	25303	0	0	0	1.86576e-05	0	0	0
SL1344_1691	narH	SL1344_1691 respiratory nitrate reductase 1 beta chain 1813734:1815269 reverse MW:57804	57767	0	0	0	0	-8.20945	-9.50978	-1.30032
SL1344_1692	narG	SL1344_1692 respiratory nitrate reductase 1 alpha chain 1815266:1819009 reverse MW:140688	140597	0	0	2.9583e-05	7.29228e-05	-8.16993	-10.9586	-2.78863
SL1344_1693	narK	SL1344_1693 nitrite extrusion protein (nitrite facilitator) 1819397:1820794 reverse MW:49828	49795	0	0	2.88004e-05	0.000198997	0	0	0
SL1344_1695	narL	SL1344_1695 nitrate/nitrite response regulator protein NarL 1822924:1823574 forward MW:23860	23845	0	0	0	0	0	0	0
SL1344_1696	ychP	SL1344_1696 hypothetical invasin 1823575:1824999 reverse MW:53383	53349	0	0	0	0	0	0	0
SL1344_1697	ychN	SL1344_1697 conserved hypothetical protein 1825176:1825529 forward MW:12667	12660	0	0	0	0	0	0	0
SL1344_1698	chaB	SL1344_1698 cation transport regulator ChaB 1825609:1825839 reverse MW:8948	8943	0	0	0	0	0	0	0
SL1344_1700	kdsA	SL1344_1700 2-dehydro-3-deoxyphosphooctonate aldolase 1827260:1828114 reverse MW:30795	30776	0	0	0	0	-5.43671	-4.29462	1.14209
SL1344_1701	ychA	SL1344_1701 hypothetical regulator 1828152:1828961 reverse MW:30924	30905	0	1.6229e-06	6.93469e-05	3.13943e-05	0	0	0
SL1344_1703	hemK	SL1344_1703 HemK protein, hypothetical protoporphyrinogen oxidase 1829351:1830184 reverse MW:30966	30947	0	0	0	0	0	0	0
SL1344_1704	prfA	SL1344_1704 peptide chain release factor 1 (RF-1) 1830184:1831266 reverse MW:40461	40436	0	0	0	0	0	-5.35755	-5.35755
SL1344_1705	hemA	SL1344_1705 Glutamyl-tRNA reductase 1831307:1832563 reverse MW:46105	46077	0	0	0	4.12483e-06	0	0	0
SL1344_1706	hemM	SL1344_1706 Outer-membrane lipoprotein lolB precursor. 1832877:1833500 forward MW:23686	23671	0	0	0	0	0	0	0
SL1344_1707	ipk	SL1344_1707 4-diphosphocytidyl-2-C-methyl-D-erythritol kinase 1833497:1834348 forward MW:30883	30864	0	0	0	0	0	0	0
SL1344_1708	prs	SL1344_1708 Ribose-phosphate pyrophosphokinase 1834614:1835561 forward MW:34216	34195	0	0	0	0	-7.16884	-5.6804	1.48844
SL1344_1709	ychM	SL1344_1709 hypothetical sulphate transporter 1835710:1837371 forward MW:58666	58627	0	4.58996e-06	0.000661937	0.000235889	0	0	0
SL1344_1710	ychH	SL1344_1710 hypothetical exported protein 1837416:1837694 reverse MW:10469	10462	0	0	0	0	0	0	0
SL1344_1711	pth	SL1344_1711 Peptidyl-tRNA hydrolase 1837970:1838554 forward MW:21178	21165	0	0	0	0	0	0	0
SL1344_1712	ychF	SL1344_1712 hypothetical ATP/GTP-binding protein 1838671:1839762 forward MW:39630	39605	0	0	0	0	-8.3443	-9.57554	-1.23124
SL1344_1713	0	SL1344_1713 conserved hypothetical protein 1839921:1841186 reverse MW:48814	48783	0	0	3.24513e-05	7.62562e-05	0	0	0
SL1344_1714	hyaA	SL1344_1714 hydrogenase-1 small subunit 1841681:1842799 forward MW:40573	40547	0	0	0	0	0	0	0
SL1344_1715	0	SL1344_1715 hydrogenase-1 large chain (nifE hydrogenase) 1842796:1844589 forward MW:66570	66527	0	0	0	0	0	0	0
SL1344_1716	hyaC	SL1344_1716 probable Ni/Fe-hydrogenase 1 b-type cytochrome subunit 1844608:1845339 forward MW:28074	28055	0	0	0	0	0	0	0
SL1344_1720	appC	SL1344_1720 cytochrome bd-II oxidase subunit I (pseudogene) 1847246:1848790 forward MW:58021	57983	0	0	0	0	0	0	0
SL1344_1723	gdhA	SL1344_1723 glutamate dehydrogenase 1850384:1851709 forward MW:48038	48008	0	0	0	0	0	-8.87958	-8.87958
SL1344_1724	treA	SL1344_1724 Periplasmic trehalase precursor 1851923:1853635 forward MW:63558	63519	0	0	0	4.7136e-05	-8.3443	-9.1472	-0.802909
SL1344_1726	ycgR	SL1344_1726 conserved hypothetical protein 1854121:1854855 forward MW:27668	27651	0	0	3.25287e-05	5.66956e-05	0	0	0
SL1344_1727	emtA	SL1344_1727 membrane-bound lytic murein transglycosylase E 1854869:1855480 reverse MW:22426	22412	0	0	0	0	0	0	0
SL1344_1728	ldcA	SL1344_1728 conserved hypothetical protein 1855651:1856565 forward MW:33351	33330	0	0	0	0	0	0	0
SL1344_1729	cvrA	SL1344_1729 Cell volume regulation protein A. Cell volume regulation protein A homolog. 1856662:1858395 forward MW:62470	62429	0	0	0	0	0	0	0
SL1344_1730	alr	SL1344_1730 Alanine racemase 1858458:1859528 reverse MW:38804	38780	0	0	0	0	0	0	0
SL1344_1731	dadA	SL1344_1731 D-amino acid dehydrogenase small subunit 1859542:1860840 reverse MW:47883	47852	0	0	0	0	0	-7	-7
SL1344_1732	ycgB	SL1344_1732 conserved hypothetical protein 1861169:1862695 forward MW:60540	60501	0	0	0	1.28135e-05	0	0	0
SL1344_1733	fadR	SL1344_1733 Fatty acid metabolism regulator protein. 1862742:1863461 reverse MW:26986	26970	0	0	0	0	0	0	0
SL1344_1734	nhaB	SL1344_1734 regulator of intracellular pH; Na+/H+ antiporter 1863681:1865225 forward MW:56541	56503	0	0	0	0	0	0	0
SL1344_1735	dsbB	SL1344_1735 Disulfide bond formation protein B 1865367:1865897 forward MW:20063	20049	0	0	0	0	0	0	0
SL1344_1737	0	SL1344_1737 conserved hypothetical protein 1866419:1866592 reverse MW:6482	6478	0	0	0	0	0	0	0
SL1344_1739	ycgN	SL1344_1739 hypothetical protein 1867273:1867734 reverse MW:18010	17999	0	0	0	0	0	0	0
SL1344_1740	ycgM	SL1344_1740 hypothetical hydrolase 1867812:1868471 reverse MW:23592	23577	0	0	0	0	0	0	0
SL1344_1741	ycgL	SL1344_1741 conserved hypothetical protein 1868521:1868853 reverse MW:12584	12577	0	0	0	0	0	-5.39232	-5.39232
SL1344_1742	minC	SL1344_1742 Probable septum site-determining protein minC. 1868940:1869647 forward MW:25246	25230	0	0	0	4.16964e-06	-8.39232	0	8.39232
SL1344_1743	minD	SL1344_1743 septum site determining protein 1869671:1870483 forward MW:29500	29482	0	0	3.35933e-05	0	4	-7.46506	-11.4651
SL1344_1744	minE	SL1344_1744 Cell division topological specificity factor. 1870487:1870753 forward MW:10181	10175	0	1.62534e-06	0	0.000282698	3	-4.41785	-7.41785
SL1344_1747	fadD	SL1344_1747 long-chain-fatty-acid--CoA ligase 1872787:1874472 reverse MW:62223	62183	0	7.80446e-07	0	1.7126e-05	0	0	0
SL1344_1748	yeaY	SL1344_1748 inner or outer membrane protein 1874677:1875258 reverse MW:20963	20950	0	0	0	0	0	0	0
SL1344_1749	yeaZ	SL1344_1749 conserved hypothetical protein 1875330:1876025 reverse MW:24742	24727	0	0	0	0	0	0	0
SL1344_1750	yoaA	SL1344_1750 hypothetical ATP-dependent helicase 1876083:1877993 reverse MW:70284	70239	0	0	0	0	0	0	0
SL1344_1751	yoaB	SL1344_1751 conserved hypothetical protein 1878124:1878468 forward MW:12587	12579	0	0	0	0	0	0	0
SL1344_1753	pabB	SL1344_1753 para-aminobenzoate synthase component I 1878734:1880098 forward MW:50979	50947	0	0	0	0	0	-5.2854	-5.2854
SL1344_1754	yeaB	SL1344_1754 conserved hypothetical protein 1880102:1880680 forward MW:21431	21417	0	0	0	3.89779e-06	0	0	0
SL1344_1755	sdaA	SL1344_1755 L-serine deaminase 1 1880944:1882308 forward MW:49052	49020	0	0	0	0	-8.23362	0	8.23362
SL1344_1757	yoaE	SL1344_1757 hypothetical membrane protein 1884069:1885628 reverse MW:56503	56467	0	0	3.01243e-05	0	0	0	0
SL1344_1759	gptB	SL1344_1759 PTS system, mannose-specific IIAB component 1886101:1887069 forward MW:34987	34965	0	0	0	0	-5.02778	-6.11177	-1.08399
SL1344_1760	manY	SL1344_1760 phosphotransferase enzyme II, C component 1887122:1887922 forward MW:27493	27475	0	4.5257e-06	0.000146828	0.000311198	-5.40088	-2.39232	3.00856
SL1344_1761	manZ	SL1344_1761 phosphotransferase enzyme II, D component 1887926:1888786 forward MW:31263	31243	0	7.90273e-07	3.37685e-05	4.20404e-06	0	-5.32193	-5.32193
SL1344_1764	rrmA	SL1344_1764 rRNA guanine-N1-methyltransferase 1890275:1891084 reverse MW:30030	30011	0	0	0	3.98383e-06	0	0	0
SL1344_1766	cspC	SL1344_1766 cold shock-like protein CspC 1893115:1893324 reverse MW:7402	7398	0	0	0	0	0	-9.01959	-9.01959
SL1344_1768	0	SL1344_1768 hypothetical exported protein 1894129:1894416 reverse MW:10566	10560	0	0	0	5.1883e-05	0	0	0
SL1344_1770	0	SL1344_1770 hypothetical exported protein 1894788:1895027 forward MW:8439	8434	0	0	0	0	0	0	0
SL1344_1771	kdgR	SL1344_1771 transcriptional regulator KdgR 1895239:1896030 reverse MW:29863	29844	0	0	0	0	-8.39232	-8.61471	-0.222392
SL1344_1773	htpX	SL1344_1773 heat shock protein 1897627:1898508 reverse MW:31879	31859	0	0	3.36234e-05	3.9196e-05	0	0	0
SL1344_1774	prc	SL1344_1774 tail-specific protease precursor 1898702:1900750 reverse MW:76780	76732	0	0	0	0	0	-8.71768	-8.71768
SL1344_1775	proQ	SL1344_1775 ProP effector 1900770:1901456 reverse MW:25438	25422	0	0	0	4.2072e-05	0	-8.01681	-8.01681
SL1344_1776	yebR	SL1344_1776 conserved hypothetical protein 1901554:1902138 reverse MW:21032	21019	0	0	0	2.59327e-05	3	3	0
SL1344_1778	0	SL1344_1778 conserved hypothetical protein 1903426:1906065 forward MW:95340	95280	0	7.55721e-07	0	0	0	-5.16993	-5.16993
SL1344_1779	yebU	SL1344_1779 conserved hypothetical protein 1906143:1907582 forward MW:53291	53257	0	0	0	3.64478e-06	0	0	0
SL1344_1780	0	SL1344_1780 conserved hypothetical protein 1907697:1907936 forward MW:8818	8812	0	0	0	0	-8.42206	-6.67243	1.74964
SL1344_1784	sopE2	SL1344_1784 Type III secretion system effector protein-causes membrane ruffling and disrupts tight junctions 1909580:1910302 reverse MW:26448	26432	0	0	3.42966e-05	1.0225e-05	0	0	0
SL1344_1787	0	SL1344_1787 hypothetical acetyltransferase 1912575:1912994 reverse MW:15658	15648	0	0	0	0	0	0	0
SL1344_1789	0	SL1344_1789 conserved hypothetical protein (pseudogene) 1913799:1914048 forward MW:9728	9851	0	0	0	0	0	0	0
SL1344_1807	0	SL1344_1807 hypothetical exported protein 1925864:1926217 reverse MW:12729	12721	0	0	0	0	0	-6.55459	-6.55459
SL1344_1809	yobA	SL1344_1809 hypothetical cation resistance protein 1927110:1927490 reverse MW:13566	13558	0	0	0	9.408e-06	0	0	0
SL1344_1812	exoX	SL1344_1812 exodeoxyribonuclease X 1928640:1929338 forward MW:26419	26403	0	0	0	0	0	0	0
SL1344_1813	opdB	SL1344_1813 oligopeptidase 1929373:1931424 reverse MW:78973	78923	0	0	0	0	0	0	0
SL1344_1814	yebE	SL1344_1814 conserved hypothetical protein 1931637:1932296 reverse MW:23661	23646	0	0	0	0	0	0	0
SL1344_1815	yebF	SL1344_1815 hypothetical exported protein 1932390:1932743 reverse MW:12807	12800	0	0	0	0	0	0	0
SL1344_1816	yebG	SL1344_1816 conserved hypothetical protein 1932811:1933101 reverse MW:10731	10725	0	0	0	0	0	0	0
SL1344_1817	purT	SL1344_1817 phosphoribosylglycinamide formyltransferase 2 1933232:1934410 forward MW:42179	42153	0	0	0	0	-8.2384	-9.3443	-1.10589
SL1344_1818	eda	SL1344_1818 KHG/KDPG aldolase 1934510:1935151 reverse MW:22187	22173	0	0	3.02217e-05	6.50372e-05	-8.31288	0	8.31288
SL1344_1819	edd	SL1344_1819 6-phosphogluconate dehydratase 1935189:1937000 reverse MW:64640	64598	0	0	3.1794e-05	0	0	0	0
SL1344_1820	zwf	SL1344_1820 glucose 6-phosphate dehydrogenase 1937235:1938710 reverse MW:55922	55886	0	0	0	0	0	-7.7879	-7.7879
SL1344_1821	hexR	SL1344_1821 hypothetical hex-regulon repressor 1939052:1939921 forward MW:32022	32001	0	0	0	2.20909e-05	0	0	0
SL1344_1822	pykA	SL1344_1822 pyruvate kinase A 1940045:1941487 forward MW:51387	51355	0	0	0	0	0	-10.2889	-10.2889
SL1344_1823	msbB	SL1344_1823 lipid A acyltransferase 1941560:1942531 reverse MW:37287	37263	0	0	0	0.000125073	0	0	0
SL1344_1825	znuA	SL1344_1825 high-affinity zinc uptake system periplasmic binding protein 1943983:1944984 reverse MW:36509	36486	0	0	0	0	0	-10.1662	-10.1662
SL1344_1826	znuC	SL1344_1826 high-affinity zinc uptake system ATP-binding protein 1945006:1945761 forward MW:27666	27649	0	0	0	0.000114914	0	0	0
SL1344_1828	ruvB	SL1344_1828 Holliday junction DNA helicase ruvB. 1946622:1947551 reverse MW:34158	34137	0	0	0	0	0	0	0
SL1344_1829	ruvA	SL1344_1829 Holliday junction DNA helicase ruvA. 1947641:1948252 reverse MW:22146	22132	0	0	0	0	0	0	0
SL1344_1833	ruvC	SL1344_1833 Crossover junction endodeoxyribonuclease ruvC 1950795:1951316 reverse MW:18791	18779	0	0	0	0	0	0	0
SL1344_1834	yebC	SL1344_1834 hypothetical protein 1951353:1952093 reverse MW:26418	26402	0	0	0	0	-6.45738	-3.45943	2.99795
SL1344_1836	aspS	SL1344_1836 Aspartyl-tRNA synthetase 1952678:1954450 reverse MW:65667	65625	0	7.5941e-07	7.03076e-05	8.75303e-06	-5.41394	-5.86705	-0.453115
SL1344_1837	yecD	SL1344_1837 hypothetical hydrolase 1954775:1955341 forward MW:20533	20521	0	4.08979e-06	0.000174757	0.000239322	0	0	0
SL1344_1839	yecN	SL1344_1839 hypothetical membrane protein 1956209:1956604 forward MW:15168	15158	0	0	0	0	0	0	0
SL1344_1840	yecO	SL1344_1840 conserved hypothetical protein 1956645:1957388 forward MW:27848	27830	0	0	0	0	0	0	0
SL1344_1841	yecP	SL1344_1841 conserved hypothetical protein 1957385:1958356 forward MW:37111	37087	0	0	0	0	0	0	0
SL1344_1842	cutC	SL1344_1842 hypothetical copper homeostasis protein 1958592:1959338 reverse MW:26611	26593	0	0	0	0	0	0	0
SL1344_1843	yecM	SL1344_1843 conserved hypothetical protein 1959358:1959927 reverse MW:21453	21440	0	0	0	0	-8.36194	0	8.36194
SL1344_1844	argS	SL1344_1844 Arginyl-tRNA synthetase 1960164:1961897 forward MW:64276	64235	0	0	3.29389e-05	0	-8.36194	-9.45943	-1.09749
SL1344_1847	flhE	SL1344_1847 flagellar protein FlhE precursor 1965387:1965779 reverse MW:14073	14064	0	0	3.28953e-05	7.04398e-05	0	0	0
SL1344_1848	flhA	SL1344_1848 flagellar biosynthesis protein FlhA 1965779:1967857 reverse MW:74850	74801	0	0	0	0	0	0	0
SL1344_1850	cheZ	SL1344_1850 chemotaxis protein CheZ 1969195:1969839 reverse MW:23920	23905	0	0	0	0	0	0	0
SL1344_1851	cheY	SL1344_1851 chemotaxis protein CheY 1969850:1970239 reverse MW:14125	14116	0	0	0	0	0	0	0
SL1344_1852	cheB	SL1344_1852 Chemotaxis response regulator protein-glutamate methylesterase 1970257:1971306 reverse MW:37552	37528	0	0	0	0	0	0	0
SL1344_1853	cheR	SL1344_1853 chemotaxis protein methyltransferase 1971303:1972169 reverse MW:32924	32903	0	0	0	0	0	0	0
SL1344_1854	cheM	SL1344_1854 methyl-accepting chemotaxis protein II 1972323:1973984 reverse MW:59614	59577	0	0	0	0	0	-8.99152	-8.99152
SL1344_1855	cheW	SL1344_1855 purine binding chemotaxis protein 1974221:1974724 reverse MW:18049	18038	0	0	0	5.08981e-05	0	-5.35755	-5.35755
SL1344_1856	cheA	SL1344_1856 chemotaxis protein CheA 1974745:1976760 reverse MW:73014	72968	0	0	0	4.14008e-06	0	-8.07682	-8.07682
SL1344_1857	motB	SL1344_1857 motility protein B 1976765:1977694 reverse MW:34159	34138	0	0	0	2.69823e-05	0	0	0
SL1344_1858	motA	SL1344_1858 motility protein A 1977691:1978521 reverse MW:30073	30054	0	0	0	0	0	0	0
SL1344_1860	flhD	SL1344_1860 Transcriptional activator flhD. 1979284:1979634 reverse MW:13295	13287	0	0	0	0	0	0	0
SL1344_1861	yecG	SL1344_1861 conserved hypothetical protein 1980421:1980849 forward MW:15498	15488	0	0	0	0	0	-5.35755	-5.35755
SL1344_1862	otsA	SL1344_1862 trehalose-6-phosphate synthase 1980867:1982288 reverse MW:53581	53548	0	0	0	4.14727e-06	-8.36194	-5.35755	3.00439
SL1344_1863	otsB	SL1344_1863 trehalose phosphatase 1982263:1983066 reverse MW:29261	29243	0	0	3.29069e-05	4.09678e-06	0	0	0
SL1344_1864	araH	SL1344_1864 conserved hypothetical protein 1983700:1984257 reverse MW:19680	19668	0	0	0	0	0	0	0
SL1344_1866	0	SL1344_1866 Putative sugar phosphate isomerase 1985490:1986128 reverse MW:23085	23071	0	0	0	0	0	0	0
SL1344_1867	0	SL1344_1867 hypothetical lipoprotein 1986384:1986719 forward MW:12197	12189	0	0	0	0	0	0	0
SL1344_1868	ftn	SL1344_1868 ferritin 1986959:1987456 forward MW:19279	19267	0	0	0	0	-5.38802	3	8.38802
SL1344_1871	yecA	SL1344_1871 conserved hypothetical protein 1989254:1989919 reverse MW:25125	25109	0	7.85093e-07	3.35471e-05	0	0	0	0
SL1344_1873	0	SL1344_1873 hypothetical exported protein 1990696:1992135 reverse MW:54379	54344	0	0	0	0	-6.3837	-4.43463	1.94908
SL1344_1874	0	SL1344_1874 hypothetical membrane protein 1992348:1992680 reverse MW:12435	12427	0	7.81558e-07	6.67921e-05	1.73237e-05	0	0	0
SL1344_1875	pgsA	SL1344_1875 phosphotidylglycerophosphate synthetase 1993381:1993929 reverse MW:20730	20717	0	0	0	0	0	0	0
SL1344_1876	uvrC	SL1344_1876 UvrABC system protein C 1993986:1995818 reverse MW:68049	68006	0	0	0	0	0	0	0
SL1344_1877	sirA	SL1344_1877 invasion response-regulator 1995815:1996471 reverse MW:23906	23890	0	0	0	0	0	0	0
SL1344_1878	yecF	SL1344_1878 conserved hypothetical protein 1996935:1997159 forward MW:8182	8177	0	0	0	0	0	0	0
SL1344_1880	yecC	SL1344_1880 hypothetical ABC-transport ATP-binding protein 1998180:1998932 reverse MW:27668	27651	0	0	0	0	0	0	0
SL1344_1881	yecS	SL1344_1881 hypothetical ABC transporter membrane protein 1998929:1999597 reverse MW:24839	24823	0	0	0	0	0	0	0
SL1344_1882	dcyD	SL1344_1882 D-cysteine desulfhydrase 1999618:2000604 reverse MW:34911	34889	0	0	0	0	0	-7.05528	-7.05528
SL1344_1883	fliY	SL1344_1883 cystine-binding periplasmic protein (FliY) 2000758:2001558 reverse MW:28805	28787	0	0	0	1.33462e-05	0	0	0
SL1344_1884	fliZ	SL1344_1884 FliZ protein 2001705:2002256 reverse MW:21688	21674	0	0	0	0	0	0	0
SL1344_1885	fliA	SL1344_1885 RNA polymerase sigma transcription factor for flagellar operon 2002315:2003034 reverse MW:27473	27456	0	0	0	0	0	0	0
SL1344_1887	fliB	SL1344_1887 lysine-N-methylase (ec 2.1.1.-) (lysine N-methyltransferase) 2003942:2005147 reverse MW:45414	45385	0	0	0	0	0	0	0
SL1344_1888	fliC	SL1344_1888 flagellin 2005226:2006713 reverse MW:51612	51581	0	0	0	0	0	-11.9509	-11.9509
SL1344_1889	fliD	SL1344_1889 flagellar hook associated protein (FliD) 2006970:2008373 forward MW:49835	49805	0	0	0	0.000395944	0	0	0
SL1344_1890	fliS	SL1344_1890 flagellar protein FliS 2008388:2008795 forward MW:14686	14678	0	0	0	0	0	0	0
SL1344_1891	fliT	SL1344_1891 flagellar protein FliT 2008795:2009163 forward MW:13704	13696	0	0	0	0	0	0	0
SL1344_1892	amyA	SL1344_1892 cytoplasmic alpha-amylase 2009235:2010719 forward MW:56522	56486	0	0	0	0	0	0	0
SL1344_1893	yedD	SL1344_1893 hypothetical lipoprotein 2010759:2011184 reverse MW:15355	15346	0	0	0	0	0	-6.52356	-6.52356
SL1344_1894	yedE	SL1344_1894 hypothetical membrane protein 2011310:2012575 forward MW:46279	46248	0	0	0	9.19689e-06	0	0	0
SL1344_1896	ydgJ	SL1344_1896 hypothetical exported protein 2013070:2013456 forward MW:14097	14088	0	0	0	0	0	0	0
SL1344_1898	fliF	SL1344_1898 flagellar basal-body M-ring protein 2014107:2015789 forward MW:61230	61193	0	0	0	0	0	0	0
SL1344_1899	fliG	SL1344_1899 flagellar motor switch protein FliG 2015782:2016777 forward MW:36851	36828	0	0	0	0	0	0	0
SL1344_1900	fliH	SL1344_1900 flagellar assembly protein FliH 2016770:2017477 forward MW:25811	25795	0	0	0	0	0	0	0
SL1344_1901	fliI	SL1344_1901 flagellum-specific ATP synthase 2017477:2018847 forward MW:49265	49234	0	0	0	0	0	0	0
SL1344_1904	fliL	SL1344_1904 flagella biosynthesis protein 2020631:2021098 forward MW:17102	17091	0	0	0	0	0	0	0
SL1344_1905	fliM	SL1344_1905 flagellar motor switch protein FliM 2021103:2022107 forward MW:37858	37835	0	0	0	0	0	0	0
SL1344_1906	fliN	SL1344_1906 flagellar motor switch protein FliN 2022104:2022517 forward MW:14789	14780	0	0	0	0	0	0	0
SL1344_1907	fliO	SL1344_1907 flagellar biosynthesis protein 2022517:2022894 forward MW:13083	13075	0	0	0	0	0	0	0
SL1344_1908	fliP	SL1344_1908 flagellar biosynthetic protein FliP 2022894:2023631 forward MW:26787	26770	0	0	0	0	0	0	0
SL1344_1914	mngB	SL1344_1914 Mannosyl-3-phosphoglycerate phosphatase 2026517:2027332 forward MW:30925	30906	0	0	0	0	0	0	0
SL1344_1917	yedI	SL1344_1917 conserved hypothetical integral membrane protein 2029450:2030361 reverse MW:31931	31911	0	0	0	0	0	0	0
SL1344_1920	dcm	SL1344_1920 DNA-cytosine methyltransferase 2031897:2033327 reverse MW:54137	54103	0	0	0	0	0	0	0
SL1344_1923	ompS	SL1344_1923 outer membrane protein S1 2035137:2036333 forward MW:43617	43590	0	0	0	0	0	-6.37504	-6.37504
SL1344_1966	yicH	SL1344_1966 predicted bacteriophage protein 2071339:2072049 reverse MW:26553	26537	0	0	0	8.33731e-06	0	0	0
SL1344_1967	0	SL1344_1967 predicted bacteriophage protein 2072244:2072939 forward MW:25665	25649	0	0	0	0	0	0	0
SL1344_1969	0	SL1344_1969 predicted bacteriophage protein 2074183:2075010 forward MW:30670	30651	0	0	0	0	0	0	0
SL1344_1977	yeeI	SL1344_1977 conserved hypothetical protein 2080066:2080863 forward MW:30192	30173	0	0	0	0	-8.27146	-5.24793	3.02354
SL1344_1986	amn	SL1344_1986 AMP nucleosidase 2089022:2090476 reverse MW:54004	53970	0	0	3.09037e-05	3.84739e-06	0	0	0
SL1344_1991	erfK	SL1344_1991 hypothetical exported protein 2094011:2094940 reverse MW:34180	34159	0	0	0	0	0	0	0
SL1344_1992	cobT	SL1344_1992 Nicotinate-nucleotide--dimethylbenzimidazole phosphoribosyltransferase 2095018:2096088 reverse MW:36613	36589	0	0	0	0	0	-5.39232	-5.39232
SL1344_1993	cobS	SL1344_1993 cobalamin (5~-phosphate) synthase 2096115:2096858 reverse MW:26316	26298	0	0	0	4.19895e-06	0	0	0
SL1344_1994	cobU	SL1344_1994 cobinamide kinase and guanylyltransferase 2096855:2097400 reverse MW:19902	19889	0	0	0	0	0	0	0
SL1344_1995	cbiP	SL1344_1995 hypothetical cobyric acid synthase 2097397:2098917 reverse MW:54967	54932	0	0	0	0	0	0	0
SL1344_1996	cbiO	SL1344_1996 hypothetical cobalt transport ATP-binding protein 2098914:2099729 reverse MW:30147	30128	0	0	0	0	0	0	0
SL1344_2000	cbiL	SL1344_2000 cobalt-precorrin-2 C(20)-methyltransferase 2101419:2102132 reverse MW:25806	25789	0	0	0	0	0	0	0
SL1344_2001	cbiK	SL1344_2001 sirohydrochlorin cobaltochelatase (ec 4.99.1.3) 2102129:2102923 reverse MW:29239	29220	0	0	0	0	0	-5.35755	-5.35755
SL1344_2002	cbiJ	SL1344_2002 cobalt-precorrin-6a reductase (ec 1.3.1.-) 2102926:2103717 reverse MW:28402	28385	0	0	0	4.09846e-06	0	0	0
SL1344_2003	cbiH	SL1344_2003 precorrin-3 C17-methyltransferase 2103714:2104439 reverse MW:25869	25852	0	0	0	0	0	0	0
SL1344_2004	cbiG	SL1344_2004 cobalamin biosynthesis protein 2104439:2105494 reverse MW:37783	37759	0	0	0	0	0	-5.2854	-5.2854
SL1344_2005	cbiF	SL1344_2005 precorrin-4 C11-methyltransferase 2105475:2106248 reverse MW:28376	28359	0	0	0	3.85175e-06	0	-6.44294	-6.44294
SL1344_2006	cbiT	SL1344_2006 precorrin-8W decarboxylase 2106232:2106810 reverse MW:20746	20733	0	0	0	8.67861e-06	0	0	0
SL1344_2008	cbiD	SL1344_2008 Putative cobalt-precorrin-6A synthase [deacetylating] 2107399:2108538 reverse MW:40814	40788	0	0	0	0	0	0	0
SL1344_2009	cbiC	SL1344_2009 precorrin-8X methylmutase 2108538:2109170 reverse MW:23034	23020	0	0	0	0	0	0	0
SL1344_2011	cbiA	SL1344_2011 Cobyrinic acid A,C-diamide synthase. 2110137:2111516 reverse MW:50037	50004	0	0	0	0	0	0	0
SL1344_2012	pocR	SL1344_2012 pdu/cob regulatory protein PocR 2112114:2112878 reverse MW:29151	29133	0	0	0	0	0	0	0
SL1344_2014	pduA	SL1344_2014 hypothetical propanediol utilization protein 2114561:2114845 forward MW:9592	9586	0	0	0	0	0	-8.13443	-8.13443
SL1344_2015	pduB	SL1344_2015 hypothetical propanediol utilization protein PduB 2114953:2115654 forward MW:24001	23986	0	0	0	2.81134e-05	0	-7.10852	-7.10852
SL1344_2016	dhaB	SL1344_2016 glycerol dehydratase large subunit 2115673:2117337 forward MW:60363	60324	0	0	0	1.37632e-05	0	-10.403	-10.403
SL1344_2017	pduD	SL1344_2017 diol dehydratase medium subunit 2117348:2118022 forward MW:24173	24158	0	0	0	0.000135379	0	-8.40514	-8.40514
SL1344_2018	pduE	SL1344_2018 diol dehydratase small subunit 2118037:2118558 forward MW:19143	19132	0	0	0	3.38845e-05	0	0	0
SL1344_2019	pduG	SL1344_2019 propanediol utilization protein 2118568:2120400 forward MW:64513	64472	0	0	0	0	0	0	0
SL1344_2020	pduH	SL1344_2020 Propanediol utilization protein 2120390:2120740 forward MW:12656	12648	0	0	0	0	0	0	0
SL1344_2021	pduJ	SL1344_2021 propanediol utilization protein 2120759:2121034 forward MW:9067	9062	0	0	0	0	0	-7.48382	-7.48382
SL1344_2022	pduK	SL1344_2022 propanediol utilization protein 2121038:2121520 forward MW:16748	16738	0	0	0	1.79103e-05	0	0	0
SL1344_2023	pduL	SL1344_2023 propanediol utilization protein 2121520:2122152 forward MW:22971	22957	0	0	0	0	0	0	0
SL1344_2026	pduO	SL1344_2026 propanediol utilization protein 2122929:2123939 forward MW:36633	36611	0	0	0	0	0	0	0
SL1344_2027	pduP	SL1344_2027 hypothetical CoA-dependent proprionaldehyde dehydrogenase 2123936:2125330 forward MW:49046	49014	0	0	0	0	0	0	0
SL1344_2028	pduQ	SL1344_2028 hypothetical propanol dehydrogenase 2125342:2126454 forward MW:39469	39445	0	0	0	0	0	0	0
SL1344_2029	pduS	SL1344_2029 propanediol utilization ferredoxin 2126451:2127806 forward MW:48390	48359	0	0	0	0	0	0	0
SL1344_2030	pduT	SL1344_2030 hypothetical propanediol utilization protein 2127809:2128363 forward MW:19150	19138	0	0	0	0	0	0	0
SL1344_2031	pduU	SL1344_2031 hypothetical propanediol utilization protein PduU 2128363:2128713 forward MW:12476	12469	0	0	0	0	0	0	0
SL1344_2035	yeeX	SL1344_2035 conserved hypothetical protein 2131363:2131698 reverse MW:13073	13065	0	0	0	0	0	-5.39232	-5.39232
SL1344_2037	gyrI	SL1344_2037 hypothetical DNA gyrase inhibitory protein 2133120:2133587 reverse MW:18062	18051	0	0	0	4.16483e-06	0	0	0
SL1344_2039	phsC	SL1344_2039 thiosulfate reductase cytochrome b subunit 2135036:2135800 reverse MW:28505	28486	0	0	0	0	0	0	0
SL1344_2040	phsB	SL1344_2040 thiosulfate reductase electron transport protein PhsB 2135797:2136375 reverse MW:21320	21306	0	0	0	0	0	0	0
SL1344_2041	phsA	SL1344_2041 thiosulfate reductase precursor 2136390:2138666 reverse MW:82800	82747	0	0	0	0	0	-8.04439	-8.04439
SL1344_2043	sopA	SL1344_2043 Type III secretion system effector protein SopA-required for invasion and bacterial escape from the SCV 2139285:2141633 forward MW:86783	86728	0	0	0	2.63779e-05	0	0	0
SL1344_2044	sbcB	SL1344_2044 exodeoxyribonuclease I 2141976:2143406 forward MW:54500	54465	0	0	0	0	0	0	0
SL1344_2047	yeeZ	SL1344_2047 conserved hypothetical protein 2146146:2146970 reverse MW:29662	29643	0	0	0	0	0	-5.39232	-5.39232
SL1344_2048	hisG	SL1344_2048 ATP phosphoribosyltransferase 2147330:2148229 forward MW:33196	33174	0	0	0	4.15779e-06	0	-5.39232	-5.39232
SL1344_2049	hisD	SL1344_2049 histidinol dehydrogenase 2148332:2149636 forward MW:45889	45861	0	0	0	4.23005e-06	0	-8.90689	-8.90689
SL1344_2050	hisC	SL1344_2050 histidinol-phosphate aminotransferase (imidazole) 2149633:2150712 forward MW:39715	39690	0	0	0	4.79519e-05	-9.3443	-8.19967	1.14462
SL1344_2051	hisB	SL1344_2051 bifunctional histidine biosynthesis protein (imidazoleglycerol-phosphate dehydratase; histidinol phosphatase) 2150709:2151776 forward MW:40183	40157	0	0	6.50419e-05	2.93533e-05	0	-7.88264	-7.88264
SL1344_2052	hisH	SL1344_2052 Imidazole glycerol phosphate synthase subunit hisH 2151773:2152366 forward MW:21835	21821	0	0	0	2.35541e-05	0	0	0
SL1344_2053	hisA	SL1344_2053 1- 2152366:2153103 forward MW:26089	26073	0	0	0	0	0	0	0
SL1344_2054	hisF	SL1344_2054 Imidazole glycerol phosphate synthase subunit hisF 2153085:2153861 forward MW:28368	28351	0	0	0	0	0	-7.98299	-7.98299
SL1344_2055	hisI	SL1344_2055 bifunctional histidine biosynthesis bifunctional protein (phosphoribosyl-AMP cyclohydrolase / phosphoribosyl-ATP pyrophosphohydrolase) 2153855:2154466 forward MW:22674	22660	0	0	0	2.53055e-05	0	0	0
SL1344_2056	wzzB	SL1344_2056 lipopolysaccharide O-antigen chain length regulator 2154547:2155530 reverse MW:36259	36236	0	0	0	0	0	-7.06609	-7.06609
SL1344_2057	udg	SL1344_2057 UDP-glucose 6-dehydrogenase 2155673:2156839 reverse MW:43634	43606	0	0	0	1.33994e-05	-6.58066	-4.66838	1.91228
SL1344_2058	gnd	SL1344_2058 6-phosphogluconate dehydrogenase, decarboxylating 2157076:2158482 reverse MW:51395	51363	0	7.31649e-07	6.69931e-05	1.77928e-05	-4.30378	-6.28887	-1.98509
SL1344_2059	rfbP	SL1344_2059 undecaprenyl-phosphate galactosephosphotransferase 2158646:2160076 reverse MW:56198	56161	0	1.60049e-06	3.15641e-05	0.000125093	0	-5.42626	-5.42626
SL1344_2060	rfbK	SL1344_2060 phosphomannomutase 2160148:2161581 reverse MW:52086	52053	0	0	0	4.29669e-06	0	-6.32193	-6.32193
SL1344_2061	cpsB2	SL1344_2061 mannose-1-phosphate guanylyltransferase 2161568:2163007 reverse MW:54046	54012	0	0	0	7.9648e-06	0	-6.37504	-6.37504
SL1344_2062	rfbN	SL1344_2062 hypothetical rhamnosyltransferase 2163008:2163952 reverse MW:35509	35486	0	0	0	8.26456e-06	0	0	0
SL1344_2063	rfbU	SL1344_2063 hypothetical glycosyltransferase 2163953:2165014 reverse MW:40682	40656	0	0	0	0	0	-5.35755	-5.35755
SL1344_2064	rfbV	SL1344_2064 hypothetical glycosyltransferase 2165334:2166335 reverse MW:38579	38554	0	0	0	4.14727e-06	0	0	0
SL1344_2066	rfbJ	SL1344_2066 CDP-abequose synthase 2167714:2168613 reverse MW:34106	34084	0	0	0	0	0	0	0
SL1344_2067	rfbH	SL1344_2067 hypothetical dehydratase RfbH 2168641:2169954 reverse MW:48104	48073	0	0	0	0	3	-6.77643	-9.77643
SL1344_2068	rfbG	SL1344_2068 CDP-glucose 4,6-dehydratase 2169981:2171060 reverse MW:41022	40996	0	8.06599e-07	0	8.76567e-05	-8.39232	-9.36413	-0.971817
SL1344_2069	rfbF	SL1344_2069 glucose-1-phosphate cytidylyltransferase 2171065:2171838 reverse MW:29035	29017	0	0	3.35911e-05	6.58658e-05	0	-6.40939	-6.40939
SL1344_2070	rfbI	SL1344_2070 hypothetical reductase RfbI 2171835:2172827 reverse MW:36582	36559	0	0	0	8.50998e-06	0	0	0
SL1344_2071	rfbC	SL1344_2071 dTDP-4-dehydrorhamnose 3,5-epimerase 2172833:2173384 reverse MW:20663	20651	0	0	0	0	-8.40088	0	8.40088
SL1344_2072	rfbA	SL1344_2072 TDP-glucose pyrophosphorylase 2173385:2174263 reverse MW:32453	32433	0	0	3.38418e-05	0	0	-7.53916	-7.53916
SL1344_2073	rfbD	SL1344_2073 dTDP-4-dehydrorhamnose reductase 2174311:2175210 reverse MW:32554	32534	0	0	0	1.86101e-05	0	0	0
SL1344_2074	rfbB	SL1344_2074 dTDP-glucose 4,6-dehydratase 2175210:2176295 reverse MW:40718	40693	0	0	0	0	0	0	0
SL1344_2075	galF	SL1344_2075 UTP-glucose-1-phosphate uridylyltransferase 2176672:2177694 reverse MW:37907	37883	0	0	0	0	-9.36632	-9	0.366322
SL1344_2082	cpsB	SL1344_2082 mannose-1-phosphate guanylyltransferase 2186216:2187652 reverse MW:53126	53092	0	0	6.59608e-05	5.12033e-05	0	-5.35755	-5.35755
SL1344_2097	asmA	SL1344_2097 hypothetical outer membrane assembly protein 2202707:2204563 reverse MW:68867	68824	0	0	0	4.06189e-06	0	-6.94251	-6.94251
SL1344_2098	dcd	SL1344_2098 deoxycytidine triphosphate deaminase 2204602:2205183 reverse MW:21236	21223	0	0	0	1.22862e-05	0	0	0
SL1344_2099	udk	SL1344_2099 Uridine kinase 2205274:2205915 reverse MW:24498	24483	0	0	0	0	0	0	0
SL1344_2104	yegN	SL1344_2104 hypothetical RND-family transporter protein 2213241:2216363 forward MW:111989	111917	0	0	0	0	0	0	0
SL1344_2108	baeR	SL1344_2108 hypothetical two-component system response regulator 2222253:2222975 forward MW:27594	27577	0	0	0	0	0	0	0
SL1344_2112	yegQ	SL1344_2112 hypothetical protease 2227400:2228761 forward MW:51084	51052	0	0	0	0	0	-6.40939	-6.40939
SL1344_2117	yegS	SL1344_2117 conserved hypothetical protein 2231729:2232628 forward MW:32029	32008	0	0	0	8.46261e-06	0	0	0
SL1344_2118	fbaB	SL1344_2118 fructose-bisphosphate aldolase class I 2232681:2233733 reverse MW:38088	38064	0	0	0	0	-5.70637	-3.4021	2.30427
SL1344_2120	yegU	SL1344_2120 hypothetical hydrolase 2235255:2236259 forward MW:35358	35336	0	5.56548e-06	0.000292394	5.92137e-05	0	0	0
SL1344_2122	yegW	SL1344_2122 hypothetical gntR-family transcriptional regulator 2237195:2237941 reverse MW:28330	28313	0	0	0	0	0	0	0
SL1344_2125	0	SL1344_2125 conserved hypothetical protein 2239971:2240285 forward MW:11835	11828	0	0	0	0	0	0	0
SL1344_2129	stcA	SL1344_2129 hypothetical fimbrial subunit protein 2244813:2245343 reverse MW:18677	18666	0	0	0	0	0	0	0
SL1344_2131	mrp	SL1344_2131 conserved hypothetical protein 2246181:2247290 reverse MW:39930	39904	0	0	0	0	0	-8.47573	-8.47573
SL1344_2132	metG	SL1344_2132 Methionyl-tRNA synthetase 2247455:2249488 forward MW:76274	76225	0	0	0	3.56174e-05	-9.28771	-9.77314	-0.485427
SL1344_2135	yehS	SL1344_2135 conserved hypothetical protein 2250946:2251413 reverse MW:17691	17680	0	0	6.24568e-05	8.74758e-05	0	0	0
SL1344_2136	yehT	SL1344_2136 hypothetical two-component system response regulator 2251460:2252179 reverse MW:27410	27392	0	0	0	0	0	0	0
SL1344_2143	yehZ	SL1344_2143 hypothetical periplasmic protein 2257791:2258708 reverse MW:32757	32737	0	0	0	0	0	-5.39232	-5.39232
SL1344_2144	bglX	SL1344_2144 periplasmic beta-glucosidase precursor 2258889:2261186 reverse MW:83392	83339	0	0	0	4.17433e-06	0	-8.87036	-8.87036
SL1344_2145	dld	SL1344_2145 D-lactate dehydrogenase 2261453:2263183 forward MW:65051	65010	0	0	0	4.67573e-05	0	0	0
SL1344_2149	yohF	SL1344_2149 hypothetical oxidoreductase 2265718:2266479 reverse MW:26830	26814	0	0	0	0	0	0	0
SL1344_2159	yohK	SL1344_2159 puatative membrane protein 2276033:2276728 forward MW:24606	24589	0	0	0	0	0	0	0
SL1344_2160	cdd	SL1344_2160 cytidine deaminase 2276882:2277766 forward MW:31619	31599	0	0	0	0	0	-6.40939	-6.40939
SL1344_2161	sanA	SL1344_2161 vancomycin resistance protein 2277943:2278662 forward MW:27376	27359	0	0	0	8.46137e-06	0	0	0
SL1344_2163	0	SL1344_2163 hypothetical oxidoreductase 2279109:2280350 forward MW:44537	44509	0	0	0	0	0	0	0
SL1344_2164	yeiA	SL1344_2164 hypothetical oxidoreductase 2280344:2281579 forward MW:45079	45049	0	0	0	0	0	0	0
SL1344_2166	mglA	SL1344_2166 galactoside transport atp-binding protein mgla 2282680:2284200 reverse MW:56487	56450	0	0	0	0	0	-7.02237	-7.02237
SL1344_2167	mglB	SL1344_2167 D-galactose-binding periplasmic protein precursor 2284334:2285332 reverse MW:35813	35791	0	0	0	1.29564e-05	0	-10.6777	-10.6777
SL1344_2168	galS	SL1344_2168 mgl repressor and galactose ultrainduction factor 2285831:2286853 reverse MW:36963	36940	0	0	0	0.000163839	0	0	0
SL1344_2170	folE	SL1344_2170 GTP cyclohydrolase I 2288160:2288828 reverse MW:24770	24755	0	0	0	0	0	0	0
SL1344_2171	yeiG	SL1344_2171 hypothetical esterase 2289158:2290015 forward MW:31972	31951	0	0	0	0	0	-5.35755	-5.35755
SL1344_2176	cirA	SL1344_2176 colicin I receptor precursor 2294268:2296259 reverse MW:73712	73667	0	0	0	4.07411e-06	0	-14.866	-14.866
SL1344_2178	yeiE	SL1344_2178 hypothetical transcriptional regulator 2298263:2299126 reverse MW:31905	31885	0	0	0	0.00298615	0	0	0
SL1344_2180	nfo	SL1344_2180 Probable endonuclease IV 2300375:2301232 forward MW:31196	31177	0	0	0	0	0	0	0
SL1344_2181	fruA	SL1344_2181 PTS system, fructose-specific IIBC component 2301297:2302985 reverse MW:57375	57338	0	0	0	0	0	-5.20945	-5.20945
SL1344_2182	fruK	SL1344_2182 1-phosphofructokinase 2303002:2303859 reverse MW:30720	30701	0	0	0	3.65562e-06	0	-5.2854	-5.2854
SL1344_2183	fruB	SL1344_2183 pts system, fructose-specific IIA/FPR component 2303940:2305070 reverse MW:39594	39569	0	0	0	3.91472e-06	0	-6.42626	-6.42626
SL1344_2188	yeiP	SL1344_2188 elongation factor p-like protein 2308440:2309012 forward MW:21386	21373	0	0	0	8.57733e-06	-8.35755	0	8.35755
SL1344_2189	yeiR	SL1344_2189 conserved hypothetical protein 2309225:2310211 forward MW:35933	35911	0	0	3.28359e-05	0	0	0	0
SL1344_2190	yeiU	SL1344_2190 hypothetical membrane protein 2310241:2310960 forward MW:26922	26904	0	0	0	0	0	0	0
SL1344_2192	rtn	SL1344_2192 rtn protein 2312272:2313828 forward MW:58372	58335	0	0	0	0	0	0	0
SL1344_2193	yejA	SL1344_2193 hypothetical transport system periplasmic binding protein 2313935:2315740 forward MW:69209	69165	0	0	0	0	0	0	0
SL1344_2194	yejB	SL1344_2194 hypothetical binding-protein-dependent transporter 2315750:2316844 forward MW:40304	40279	0	0	0	0	0	0	0
SL1344_2196	yejF	SL1344_2196 hypothetical ABC-transporter ATP-binding protein 2317871:2319460 forward MW:58515	58479	0	0	0	0	0	0	0
SL1344_2199	rsuA	SL1344_2199 ribosomal small subunit pseudouridine synthase 2321417:2322112 reverse MW:25760	25744	0	0	0	0	0	0	0
SL1344_2201	rplY	SL1344_2201 50s ribosomal protein L25 2324149:2324433 forward MW:10541	10535	0	0	0	0	-3.3837	-5.47472	-2.09102
SL1344_2203	yejK	SL1344_2203 nucleoid-asociated protein 2325190:2326197 reverse MW:37877	37853	0	3.18173e-06	3.34494e-05	0.000142259	0	-8.224	-8.224
SL1344_2205	yejM	SL1344_2205 hypothetical sulphatase 2326636:2328396 forward MW:67132	67089	0	0	0	2.99254e-05	0	-6.42626	-6.42626
SL1344_2208	oafA	SL1344_2208 hypothetical lipopolysaccharide modification acyltransferase 2329846:2331675 forward MW:69648	69602	0	0	0	8.55459e-06	0	0	0
SL1344_2214	0	SL1344_2214 predicted bacteriophage protein 2335540:2336871 forward MW:50871	50838	0	0	0	0	0	0	0
SL1344_2221	0	SL1344_2221 exported protein 2343125:2343688 reverse MW:20576	20563	0	0	0	0	-5.3966	3	8.3966
SL1344_2222	narP	SL1344_2222 nitrate/nitrite response regulator protein NarP 2344418:2345065 forward MW:23776	23762	0	7.88614e-07	3.36976e-05	0	0	0	0
SL1344_2223	ccmH	SL1344_2223 cytochrome C-type biogenesis protein H2 2345109:2346152 reverse MW:38418	38394	0	0	0	0	0	-7.49985	-7.49985
SL1344_2223A	ccmG	SL1344_2223A cytochrome C-type biogenesis protein 2346149:2346706 reverse MW:20678	20666	0	0	0	1.81139e-05	0	0	0
SL1344_2223C	ccmE	SL1344_2223C protoheme transport protein 2348631:2349110 reverse MW:17688	17677	0	0	0	0	0	0	0
SL1344_2224	ccmA	SL1344_2224 protoheme transport protein 2350761:2351378 reverse MW:22335	22322	0	0	0	0	0	0	0
SL1344_2227	napH	SL1344_2227 ferredoxin-type protein NapH 2352576:2353445 reverse MW:32297	32276	0	0	0	0	0	0	0
SL1344_2229	napA	SL1344_2229 probable nitrate reductase 2354134:2356620 reverse MW:92874	92815	0	0	0	0	0	-10.6528	-10.6528
SL1344_2232	eco	SL1344_2232 Ecotin precursor. 2357775:2358269 forward MW:18218	18206	0	0	0	0.000160955	0	0	0
SL1344_2234	alkB	SL1344_2234 AlkB protein 2360197:2360847 reverse MW:23787	23772	0	0	0	0	0	0	0
SL1344_2236	apbE	SL1344_2236 thiamine biosynthesis protein 2361992:2363044 reverse MW:38149	38124	0	0	0	0	0	0	0
SL1344_2237	ompC	SL1344_2237 outer membrane protein C 2363159:2364127 reverse MW:35270	35249	0	0	0	0	-3.4761	-5.48581	-2.00972
SL1344_2238	yojN	SL1344_2238 hypothetical two-component system sensor kinase 2365024:2367693 forward MW:99811	99748	0	1.32649e-05	0.000148021	0.000595989	0	0	0
SL1344_2239	rcsB	SL1344_2239 regulator of capsule synthesis B component 2367710:2368360 forward MW:23714	23700	0	0	0	0	0	0	0
SL1344_2240	rcsC	SL1344_2240 sensor protein RcsC 2368463:2371309 reverse MW:106280	106212	0	0	0	0	0	0	0
SL1344_2241	gyrA	SL1344_2241 DNA gyrase subunit A 2371427:2374063 reverse MW:97065	97004	0	0	0	0	-9.9571	-11.0802	-1.12305
SL1344_2245	ubiG	SL1344_2245 3-demethylubiquinone-9 3-methyltransferase 2378032:2378760 forward MW:26854	26837	0	0	9.93532e-05	0.000216459	0	-5.35755	-5.35755
SL1344_2246	nrdA	SL1344_2246 ribonucleoside-diphosphate reductase 1 alpha chain 2379116:2381401 forward MW:85737	85682	0	0	0	4.10642e-06	0	-9.03342	-9.03342
SL1344_2247	nrdB	SL1344_2247 ribonucleoside-diphosphate reductase 1 beta chain 2381514:2382644 forward MW:43552	43525	0	0	0	5.2442e-05	0	-8.17493	-8.17493
SL1344_2250	0	SL1344_2250 hypothetical transcriptional regulator 2384252:2385130 forward MW:32504	32483	0	0	0	2.88596e-05	0	0	0
SL1344_2251	glpQ	SL1344_2251 glycerophosphoryl diester phosphodiesterase periplasmic precursor 2385246:2386316 reverse MW:40425	40399	0	0	0	0	0	-12.0997	-12.0997
SL1344_2252	glpT	SL1344_2252 glycerol-3-phosphate transporter 2386321:2387679 reverse MW:50180	50147	0	0	0	0.000438893	0	-7.43463	-7.43463
SL1344_2253	glpA	SL1344_2253 anaerobic glycerol-3-phosphate dehydrogenase subunit A 2387952:2389580 forward MW:59029	58992	0	0	0	1.72646e-05	-8.2384	-10.3038	-2.06538
SL1344_2254	glpB	SL1344_2254 Anaerobic glycerol-3-phosphate dehydrogenase subunit B 2389570:2390829 forward MW:45671	45642	0	0	3.02103e-05	0.000126372	0	-8.15482	-8.15482
SL1344_2255	glpC	SL1344_2255 anaerobic glycerol-3-phosphate dehydrogenase subunit C 2390826:2392016 forward MW:44130	44102	0	0	0	2.85173e-05	0	-7.85175	-7.85175
SL1344_2258	0	SL1344_2258 hypothetical 2,4-dihydroxyhept-2-ene-1,7-dioic acid aldolase 2393756:2394559 reverse MW:28727	28709	0	0	0	2.30563e-05	0	0	0
SL1344_2260	yfaW	SL1344_2260 hypothetical MR-MLE-family protein 2395930:2397147 reverse MW:44706	44677	0	0	0	0	0	0	0
SL1344_2262	0	SL1344_2262 conserved hypothetical protein 2398181:2399377 reverse MW:43946	43919	0	0	0	0	0	-5.2854	-5.2854
SL1344_2263	yfaZ	SL1344_2263 conserved hypothetical protein 2399492:2400058 reverse MW:19613	19601	0	0	0	3.92011e-06	0	0	0
SL1344_2264	yfaO	SL1344_2264 conserved hypothetical protein 2400313:2400738 forward MW:16301	16291	0	0	0	0	0	0	0
SL1344_2265	ais	SL1344_2265 hypothetical protein (protein induced by aluminum) 2400783:2401388 reverse MW:22027	22013	0	0	0	0	0	0	0
SL1344_2266	yfbE	SL1344_2266 hypothetical lipopolysaccharide biosynthesis protein 2401669:2402826 forward MW:41813	41786	0	0	0	0	0	-7.49985	-7.49985
SL1344_2267	pmrF	SL1344_2267 hypothetical lipopolysaccharide modification protein 2402829:2403812 forward MW:36516	36493	0	0	0	1.81158e-05	-8.39232	-6.39232	2
SL1344_2268	yfbG	SL1344_2268 hypothetical lipopolysaccharide modification protein 2403809:2405791 forward MW:73588	73542	0	0	3.36391e-05	8.37587e-06	-9.93517	-7.40088	2.53429
SL1344_2269	0	SL1344_2269 conserved hypothetical protein 2405788:2406687 forward MW:33010	32989	0	0	9.792e-05	1.68794e-05	0	0	0
SL1344_2270	arnT	SL1344_2270 melittin resistance protein PqaB 2406684:2408330 forward MW:61821	61781	0	0	0	0	0	0	0
SL1344_2273	pmrD	SL1344_2273 polymyxin B resistance protein 2409034:2409291 reverse MW:9749	9743	0	0	0	0	0	0	0
SL1344_2274	menE	SL1344_2274 O-succinylbenzoic acid-CoA ligase 2409389:2410756 reverse MW:50244	50212	0	0	0	0	0	0	0
SL1344_2275	menC	SL1344_2275 O-succinylbenzoate synthase 2410753:2411715 reverse MW:35360	35338	0	0	0	0	0	0	0
SL1344_2276	menB	SL1344_2276 naphthoate synthase 2411715:2412572 reverse MW:31693	31672	0	0	0	0	0	-6.40939	-6.40939
SL1344_2277	yfbB	SL1344_2277 conserved hypothetical protein 2412587:2413345 reverse MW:27691	27674	0	0	0	8.48092e-06	0	0	0
SL1344_2278	menD	SL1344_2278 menaquinone biosynthesis protein 2413342:2415012 reverse MW:61524	61485	0	0	0	0	0	0	0
SL1344_2279	menF	SL1344_2279 isochorismate synthase 2415098:2416393 reverse MW:48729	48699	0	0	0	0	0	0	0
SL1344_2280	elaB	SL1344_2280 conserved hypothetical protein 2416494:2416805 reverse MW:11637	11630	0	0	0	0	3	-4.97728	-7.97728
SL1344_2281	elaA	SL1344_2281 conserved hypothetical protein 2416854:2417315 reverse MW:17445	17434	0	7.80541e-07	0	2.52102e-05	0	0	0
SL1344_2282	elaC	SL1344_2282 Ribonuclease Z 2417376:2418293 forward MW:32876	32856	0	0	0	0	0	0	0
SL1344_2283	0	SL1344_2283 hypothetical receptor/regulator protein 2418359:2419360 forward MW:37011	36987	0	0	0	0	0	0	0
SL1344_2285	nuoN	SL1344_2285 NADH dehydrogenase I chain N 2422070:2423527 reverse MW:52041	52007	0	0	0	0	0	0	0
SL1344_2286	nuoM	SL1344_2286 NADH dehydrogenase I chain M 2423534:2425063 reverse MW:56636	56598	0	0	0	0	0	0	0
SL1344_2287	nuoL	SL1344_2287 NADH dehydrogenase I chain L 2425377:2427218 reverse MW:66462	66417	0	0	0	0	0	0	0
SL1344_2288	nuoK	SL1344_2288 NADH dehydrogenase I chain k 2427215:2427517 reverse MW:10818	10811	0	0	0	0	0	-5.42626	-5.42626
SL1344_2289	nuoJ	SL1344_2289 NADH dehydrogenase I chain J 2427514:2428068 reverse MW:19849	19837	0	0	0	4.27342e-06	0	0	0
SL1344_2290	nuoI	SL1344_2290 NADH dehydrogenase I chain I 2428079:2428621 reverse MW:20519	20506	0	0	0	0	3	3	0
SL1344_2291	nuoH	SL1344_2291 NADH dehydrogenase I chain H 2428636:2429613 reverse MW:36292	36268	0	7.86428e-07	0	0	0	0	0
SL1344_2292	nuoG	SL1344_2292 NADH dehydrogenase I chain G 2429610:2432336 reverse MW:100028	99965	0	0	0	0	-7.87036	-7.38802	0.482347
SL1344_2293	nuoF	SL1344_2293 NADH dehydrogenase I chain F 2432367:2433704 reverse MW:49245	49214	0	1.43766e-06	0.000327635	0.000234538	0	-9.26444	-9.26444
SL1344_2294	nuoE	SL1344_2294 NADH dehydrogenase I chain E 2433701:2434201 reverse MW:18602	18590	0	0	0	6.14983e-05	0	0	0
SL1344_2295	nuoC	SL1344_2295 NADH dehydrogenase I chain C; chain D 2434204:2436006 reverse MW:68861	68817	0	0	0	0	-6.04002	-5.3762	0.663818
SL1344_2296	nuoB	SL1344_2296 NADH dehydrogenase I chain B 2436093:2436755 reverse MW:25089	25072	0	1.48456e-06	9.86771e-05	6.2302e-05	-4.3837	4	8.3837
SL1344_2297	nuoA	SL1344_2297 NADH dehydrogenase I chain A 2436771:2437214 reverse MW:16493	16483	0	1.6226e-06	3.3383e-05	0	-7.22762	-4.7879	2.43971
SL1344_2299	lrhA	SL1344_2299 NADH dehydrogenase operon transcriptional regulator 2437841:2438779 reverse MW:34429	34407	0	7.90177e-07	0.000119864	2.20685e-05	0	-6.37504	-6.37504
SL1344_2300	yfbQ	SL1344_2300 hypothetical aminotransferase 2439711:2440925 forward MW:45491	45462	0	0	0	8.33582e-06	0	-6.33985	-6.33985
SL1344_2301	0	SL1344_2301 Hypothetical UPF0207 protein <ORFName>. 2441019:2441618 forward MW:22697	22683	0	0	0	8.11567e-06	0	0	0
SL1344_2303	yfbT	SL1344_2303 hypothetical phosphatase 2443613:2444290 reverse MW:23903	23888	0	0	0	0	0	0	0
SL1344_2304	yfbU	SL1344_2304 Hypothetical UPF0304 protein <ORFName>. 2444283:2444777 reverse MW:19524	19511	0	0	0	0	-8.32193	0	8.32193
SL1344_2306	ackA	SL1344_2306 acetate kinase 2445655:2446857 forward MW:43257	43230	0	0	3.19736e-05	0	-7.24657	-7.78977	-0.543196
SL1344_2307	pta	SL1344_2307 phosphate acetyltransferase 2446934:2449078 forward MW:77279	77230	0	7.2534e-07	0.000106265	0.000154896	-11.0607	-12.2538	-1.19315
SL1344_2308	yfcC	SL1344_2308 hypothetical membrane protein 2449296:2450816 forward MW:54805	54769	0	0	0.000213571	0.000488445	0	0	0
SL1344_2309	0	SL1344_2309 hypothetical transketolase C-terminal section 2450865:2451818 reverse MW:34562	34540	0	0	0	0	0	-5.32193	-5.32193
SL1344_2310	0	SL1344_2310 hypothetical transketolase N-terminal section 2451811:2452641 reverse MW:30397	30378	0	0	0	3.96381e-06	0	0	0
SL1344_2311	ulaA	SL1344_2311 hypothetical membrane protein 2452638:2454029 reverse MW:48940	48907	0	0	0	0	0	0	0
SL1344_2312	0	SL1344_2312 hypothetical sugar phosphotransferase component II B 2454050:2454322 reverse MW:9708	9702	0	0	0	0	0	0	0
SL1344_2313	0	SL1344_2313 hypothetical sugar phosphotransferase component II A 2454403:2454846 reverse MW:16099	16089	0	0	0	0	0	0	0
SL1344_2315	0	SL1344_2315 conserved hypothetical protein 2456124:2456678 reverse MW:20906	20893	0	0	0	0	-5.32643	3	8.32643
SL1344_2316	yfcE	SL1344_2316 conserved hypothetical protein 2456735:2457286 reverse MW:19904	19892	0	7.51191e-07	3.20985e-05	0	0	0	0
SL1344_2317	yfcF	SL1344_2317 hypothetical glutathione-S transferase 2457342:2457986 reverse MW:23947	23932	0	0	0	0	0	0	0
SL1344_2319	yfcH	SL1344_2319 conserved hypothetical protein 2458902:2459795 forward MW:32889	32868	0	0	0	0	0	0	0
SL1344_2320	hisP	SL1344_2320 histidine transport ATP-binding protein 2459847:2460623 reverse MW:28771	28753	0	0	0	0	0	0	0
SL1344_2323	hisJ	SL1344_2323 histidine-binding periplasmic protein 2462207:2462989 reverse MW:28379	28362	0	0	0	0	-8.32193	-9.64205	-1.32012
SL1344_2324	argT	SL1344_2324 lysine-arginine-ornithine-binding periplasmic protein precursor 2463227:2464009 reverse MW:28200	28182	0	0	3.19538e-05	7.9924e-05	0	0	0
SL1344_2325	ubiX	SL1344_2325 hypothetical decarboxylase 2464298:2464867 reverse MW:20691	20678	0	0	0	0	0	0	0
SL1344_2330	0	SL1344_2330 hypothetical transcriptional regulator 2470589:2472016 forward MW:53424	53390	0	0	0	0	0	0	0
SL1344_2331	purF	SL1344_2331 amidophosphoribosyltransferase 2472052:2473569 reverse MW:56558	56522	0	0	0	0	-8.43879	-8.37504	0.0637524
SL1344_2332	cvpA	SL1344_2332 colicin V production protein (DedE protein) 2473607:2474095 reverse MW:18050	18039	0	0	3.47345e-05	3.3153e-05	0	0	0
SL1344_2333	dedD	SL1344_2333 DedD protein 2474406:2475080 reverse MW:23471	23456	0	0	0	0	-8.39232	-7.13955	1.25277
SL1344_2334	folC	SL1344_2334 folylpolyglutamate synthase 2475070:2476338 reverse MW:45481	45453	0	0	3.36337e-05	1.40572e-05	0	-6.33985	-6.33985
SL1344_2335	accD	SL1344_2335 acetyl-CoA carboxylase beta subunit 2476406:2477320 reverse MW:33216	33194	0	0	0	8.11407e-06	3	-5.55842	-8.55842
SL1344_2336	dedA	SL1344_2336 DedA protein (dsg-1 protein) 2477470:2478129 reverse MW:24448	24432	0	7.95642e-07	0	3.76702e-05	0	0	0
SL1344_2337	truA	SL1344_2337 tRNA pseudouridine synthase A 2478178:2478990 reverse MW:30271	30252	0	0	0	0	0	0	0
SL1344_2338	usg	SL1344_2338 hypothetical semialdehyde dehydrogenase 2478990:2480003 reverse MW:36288	36265	0	0	0	0	0	-7.53138	-7.53138
SL1344_2339	pdxB	SL1344_2339 Erythronate-4-phosphate dehydrogenase 2480071:2481207 reverse MW:41298	41273	0	0	0	1.84968e-05	-8.40088	-8.95128	-0.550405
SL1344_2340	div	SL1344_2340 Div protein 2481311:2482312 forward MW:37056	37033	0	0	3.3818e-05	4.947e-05	0	0	0
SL1344_2347	fabB	SL1344_2347 3-oxoacyl-[acyl-carrier-protein] synthase I 2486338:2487552 reverse MW:42373	42346	0	0	0	0	-4.76155	-4.94642	-0.184868
SL1344_2348	mnmC	SL1344_2348 conserved hypothetical protein 2487652:2489712 forward MW:76046	75997	0	2.43603e-06	6.50573e-05	7.39743e-05	0	0	0
SL1344_2349	yfcL	SL1344_2349 conserved hypothetical protein 2489764:2490039 reverse MW:9979	9973	0	0	0	0	0	0	0
SL1344_2350	yfcM	SL1344_2350 conserved hypothetical protein 2490072:2490620 reverse MW:21189	21176	0	0	0	0	0	0	0
SL1344_2353	aroC	SL1344_2353 Chorismate synthase 2492257:2493342 reverse MW:39109	39084	0	0	0	0	0	-7.48382	-7.48382
SL1344_2354	yfcB	SL1344_2354 conserved hypothetical protein 2493378:2494310 reverse MW:35064	35041	0	0	0	1.79411e-05	0	0	0
SL1344_2355	yfcN	SL1344_2355 conserved hypothetical protein 2494476:2495027 forward MW:21177	21164	0	0	0	0	0	0	0
SL1344_2356	sixA	SL1344_2356 phosphohistidine phosphatase 2495127:2495612 reverse MW:17291	17280	0	0	0	0	0	0	0
SL1344_2357	fadJ	SL1344_2357 hypothetical fatty acid oxidation complex alpha subunit 2495821:2497968 reverse MW:77256	77207	0	0	0	0	0	-5.2854	-5.2854
SL1344_2359	yfcZ	SL1344_2359 conserved hypothetical protein 2499456:2499740 reverse MW:10287	10281	0	0	0	3.9379e-06	0	-7.40939	-7.40939
SL1344_2360	fadL	SL1344_2360 long-chain fatty acid transport protein precursor 2500105:2501418 forward MW:47705	47675	0	0	0	1.70422e-05	-8.41785	-8.15987	0.257981
SL1344_2361	vacJ	SL1344_2361 VacJ lipoprotein precursor 2501479:2502234 reverse MW:28185	28167	0	0	3.41807e-05	2.85717e-05	0	-5.32193	-5.32193
SL1344_2363	pgtE	SL1344_2363 outer membrane protease E 2503771:2504709 reverse MW:35055	35033	0	0	0	3.95077e-06	5.08746	-3.70044	-8.7879
SL1344_2364	pgtA	SL1344_2364 phosphoglycerate transport system transcriptional regulatory protein PgtA 2504977:2506224 reverse MW:47526	47495	0	3.44286e-06	0	4.42243e-05	0	0	0
SL1344_2366	pgtC	SL1344_2366 phosphoglycerate transport regulatory protein PgtC precursor 2508217:2509410 reverse MW:44015	43988	0	0	0	0	0	0	0
SL1344_2370	yfdZ	SL1344_2370 hypothetical aminotransferase 2513721:2514959 reverse MW:46219	46190	0	0	0	0	0	-6.35755	-6.35755
SL1344_2371	glk	SL1344_2371 Glucokinase 2515680:2516645 reverse MW:34595	34573	0	0	0	8.24563e-06	-8.31741	-7.91886	0.398549
SL1344_2373	0	SL1344_2373 hypothetical decarboxylase 2518104:2519756 reverse MW:59892	59853	0	0	3.18693e-05	2.42464e-05	0	0	0
SL1344_2374	0	SL1344_2374 hypothetical ion-channel protein 2519936:2520934 forward MW:37382	37359	0	0	0	0	0	0	0
SL1344_2377	nupC	SL1344_2377 nucleoside permease NupC 2523019:2524221 forward MW:43395	43366	0	0	0	0	0	-5.2854	-5.2854
SL1344_2378	yfeA	SL1344_2378 hypothetical membrane protein 2524274:2526463 reverse MW:83197	83142	0	0	0	3.87075e-06	0	0	0
SL1344_2379	yfeC	SL1344_2379 conserved hypothetical protein 2527069:2527431 forward MW:13543	13535	0	0	0	0	0	0	0
SL1344_2380	yfeD	SL1344_2380 conserved hypothetical protein 2527433:2527825 forward MW:14974	14965	0	0	0	0	0	-5.39232	-5.39232
SL1344_2381	gltX	SL1344_2381 Glutamyl-tRNA synthetase 2527879:2529294 reverse MW:53634	53600	0	0	0	4.19805e-06	-9.36413	-8.62936	0.734778
SL1344_2390	lig	SL1344_2390 DNA ligase 2536717:2538732 reverse MW:73453	73406	0	0	6.58777e-05	3.96407e-05	0	-8.54689	-8.54689
SL1344_2391	zipA	SL1344_2391 cell division protein 2538804:2539790 reverse MW:36334	36311	0	0	0	3.74403e-05	-8.38802	-6.37504	2.01298
SL1344_2392	cysZ	SL1344_2392 hypothetical sulfate transport protein CysZ 2540022:2540783 forward MW:28906	28887	0	0	3.34713e-05	8.3341e-06	0	0	0
SL1344_2393	cysK	SL1344_2393 cysteine synthase A 2540947:2541918 forward MW:34536	34514	0	0	0	0	-7.25207	-6.22521	1.02687
SL1344_2394	ptsH	SL1344_2394 phosphocarrier protein HPr 2542302:2542559 forward MW:9119	9114	0.0003864	1.57184e-06	0.000243914	0.000119705	0	-11.2929	-11.2929
SL1344_2395	ptsI	SL1344_2395 phosphoenolpyruvate-protein phosphotransferase (ec 2.7.3.9) (phosphotransferase system, enzyme i) 2542608:2544335 forward MW:63369	63329	0	0	0	0.000250905	-6.3739	-6.20176	0.172137
SL1344_2396	crr	SL1344_2396 pts system, glucose-specific IIA component 2544376:2544885 forward MW:18247	18236	0	6.07185e-06	0.000505929	0.000448978	-6.39293	-2.93411	3.45882
SL1344_2398	pdxK	SL1344_2398 pyridoxine kinase 2545270:2546136 reverse MW:30967	30948	0	2.75377e-06	0.000235338	2.13927e-05	0	0	0
SL1344_2399	ptsJ	SL1344_2399 hypothetical transcriptional regulator 2546219:2547511 forward MW:46508	46479	0	0	0	0	0	0	0
SL1344_2400	yfeJ	SL1344_2400 hypothetical amidotransferase 2547526:2548245 forward MW:26951	26934	0	0	0	0	0	0	0
SL1344_2403	cysM	SL1344_2403 cysteine synthase B 2549367:2550278 reverse MW:32645	32625	0	0	0	0	0	0	0
SL1344_2408	ucpA	SL1344_2408 hypothetical oxidoreductase 2554315:2555106 reverse MW:27870	27852	0	0	0	0	-8.29462	-8.64746	-0.352838
SL1344_2409	0	SL1344_2409 conserved hypothetical protein 2555344:2556243 reverse MW:33048	33028	0	0	3.13792e-05	4.01313e-05	0	-7.07682	-7.07682
SL1344_2410	yfeY	SL1344_2410 hypothetical outer membrane lipoprotein 2556338:2556913 reverse MW:20540	20527	0	0	0	1.34766e-05	0	0	0
SL1344_2412	0	SL1344_2412 Hypothetical acetyltransferase <ORFName> 2557411:2557836 reverse MW:16284	16274	0	0	0	0	0	0	0
SL1344_2413	amiA	SL1344_2413 probable N-acetylmuramoyl-L-alanine amidase 2558049:2558918 forward MW:31659	31640	0	0	0	0	0	0	0
SL1344_2414	hemF	SL1344_2414 Coproporphyrinogen III oxidase, aerobic 2558921:2559820 forward MW:34429	34408	0	0	0	0	0	0	0
SL1344_2418	eutK	SL1344_2418 ethanolamine utilization protein EutK 2562876:2563370 reverse MW:17486	17475	0	0	0	0	0	0	0
SL1344_2419	eutL	SL1344_2419 ethanolamine utilization protein EutL 2563383:2564042 reverse MW:22695	22681	0	0	0	0	0	0	0
SL1344_2420	eutC	SL1344_2420 Ethanolamine ammonia-lyase light chain 2564052:2564948 reverse MW:32137	32117	0	0	0	0	0	-7.07682	-7.07682
SL1344_2421	eutB	SL1344_2421 ethanolamine ammonia-lyase heavy chain 2564967:2566328 reverse MW:49449	49418	0	0	0	1.35144e-05	0	-6.35755	-6.35755
SL1344_2422	eutA	SL1344_2422 hypothetical ethanolamine utilization protein EutA 2566340:2567743 reverse MW:49527	49496	0	0	0	8.19175e-06	0	0	0
SL1344_2423	eutH	SL1344_2423 hypothetical membrane protein 2567740:2568966 reverse MW:42827	42798	0	0	0	0	0	0	0
SL1344_2424	eutG	SL1344_2424 hypothetical alchohol dehydrogenase 2569086:2570273 reverse MW:40903	40877	0	0	0	0	0	0	0
SL1344_2425	eutJ	SL1344_2425 hypothetical ethanolamine utilization protein EutJ 2570263:2571102 reverse MW:30018	29999	0	0	0	0	0	0	0
SL1344_2426	eutE	SL1344_2426 hypothetical aldehyde dehydrogenase 2571113:2572516 reverse MW:49174	49143	0	0	0	0	-8.2384	-5.24793	2.99048
SL1344_2427	eutN	SL1344_2427 ethanolamine utilization protein 2572528:2572827 reverse MW:10351	10344	0	0	3.01999e-05	3.75977e-06	0	0	0
SL1344_2428	eutM	SL1344_2428 ethanolamine utilization protein 2572928:2573218 reverse MW:9842	9836	0	0	0	0	0	-7.43463	-7.43463
SL1344_2429	eutD	SL1344_2429 hypothetical phosphate acyltransferase 2573259:2574275 reverse MW:36266	36243	0	0	0	1.7308e-05	0	0	0
SL1344_2430	eutT	SL1344_2430 hypothetical cobalamin adenosyltransferase 2574272:2575075 reverse MW:30239	30220	0	0	0	0	0	0	0
SL1344_2431	eutQ	SL1344_2431 hypothetical ethanolamine utilization protein EutQ 2575072:2575761 reverse MW:24992	24976	0	0	0	0	0	0	0
SL1344_2432	eutP	SL1344_2432 hypothetical ethanolamine utilization protein EutP 2575739:2576218 reverse MW:17726	17715	0	0	0	0	0	0	0
SL1344_2433	eutS	SL1344_2433 hypothetical ethanolamine utilization protein EutS 2576231:2576566 reverse MW:11672	11665	0	0	0	0	0	0	0
SL1344_2435	maeB	SL1344_2435 NADP-dependent malate dehydrogenase (decarboxylating) 2577695:2579974 reverse MW:82323	82270	0	0	0	0	-11.8887	-10.5708	1.31794
SL1344_2436	tal	SL1344_2436 Transaldolase 2580246:2581196 forward MW:35592	35569	0	0	0.000379181	0.00015211	-5.35755	-5.79442	-0.436864
SL1344_2437	tktB	SL1344_2437 transketolase 2 2581216:2583216 forward MW:73032	72986	0	7.67313e-07	3.27874e-05	4.44473e-05	-8.224	-9.10066	-0.876661
SL1344_2438	0	SL1344_2438 hypothetical protein 2583279:2583509 reverse MW:8307	8302	0	0	2.99014e-05	5.49085e-05	0	-5.39232	-5.39232
SL1344_2440	yffH	SL1344_2440 conserved hypothetical protein 2584805:2585380 reverse MW:21810	21796	0	0	0	4.23439e-06	0	0	0
SL1344_2442	aegA	SL1344_2442 hypothetical oxidoreductase 2587331:2589292 reverse MW:71419	71372	0	0	0	0	0	0	0
SL1344_2443	narQ	SL1344_2443 nitrate/nitrite sensor protein NarQ 2589478:2591178 forward MW:63741	63701	0	0	0	0	0	0	0
SL1344_2445	yffB	SL1344_2445 conserved hypothetical protein 2595050:2595406 forward MW:13547	13539	0	0	0	0	0	0	0
SL1344_2446	dapE	SL1344_2446 succinyl-diaminopimelate desuccinylase 2595410:2596537 forward MW:41579	41552	0	0	0	0	0	-7.49185	-7.49185
SL1344_2447	0	SL1344_2447 hypothetical membrane protein 2596565:2596765 forward MW:8099	8094	0	0	0	1.80144e-05	0	0	0
SL1344_2449	0	SL1344_2449 hypothetical membrane protein 2598826:2599689 reverse MW:31514	31495	0	0	0	0	0	-6.39232	-6.39232
SL1344_2450	purC	SL1344_2450 phosphoribosylaminoimidazole-succinocarboxamide synthase 2599820:2600533 reverse MW:26908	26891	0	0	0	8.43352e-06	-6.42836	-4.09803	2.33033
SL1344_2451	nlpB	SL1344_2451 hypothetical lipoprotein 2600708:2601742 reverse MW:36937	36915	0	7.73475e-07	6.88556e-05	1.37156e-05	-8.00878	-7.22038	0.7884
SL1344_2452	dapA	SL1344_2452 Dihydrodipicolinate synthase 2601759:2602637 reverse MW:31294	31274	0	1.5927e-06	0.000412118	0.000238649	0	-8.28077	-8.28077
SL1344_2453	gcvR	SL1344_2453 glycine cleavage system transcriptional repressor 2602783:2603355 forward MW:20774	20761	0	0	0	3.11047e-05	0	0	0
SL1344_2454	bcp	SL1344_2454 bacterioferritin comigratory protein 2603355:2603825 forward MW:17609	17598	0	0	0	0	-5.33985	-3.49185	1.848
SL1344_2457	0	SL1344_2457 hypothetical exported protein 2605687:2607150 forward MW:53741	53707	0	7.59266e-07	3.24435e-05	8.97576e-06	0	-7.02237	-7.02237
SL1344_2458	yfgD	SL1344_2458 hypothetical arsenate reductase (arsenical pump modifier) 2607190:2607549 forward MW:13377	13369	0	0	0	1.30117e-05	-8.36194	-7.31288	1.04906
SL1344_2459	yfgE	SL1344_2459 conserved hypothetical protein 2607576:2608301 reverse MW:27471	27454	0	0	3.28626e-05	1.58537e-05	0	0	0
SL1344_2461	upp	SL1344_2461 uracil phosphoribosyltransferase 2609749:2610375 reverse MW:22533	22519	0	0	0	0	0	-5.32193	-5.32193
SL1344_2462	purM	SL1344_2462 Phosphoribosylformylglycinamidine cyclo-ligase 2610774:2611826 forward MW:37370	37346	0	0	0	4.01999e-06	0	-7.89482	-7.89482
SL1344_2463	purN	SL1344_2463 phosphoribosylglycinamidine myltransferase 2611826:2612464 forward MW:23479	23465	0	0	0	2.38102e-05	0	-5.39232	-5.39232
SL1344_2464	ppk	SL1344_2464 Polyphosphate kinase 2612653:2614719 forward MW:80457	80406	0	0	0	4.18887e-06	0	-7.35755	-7.35755
SL1344_2465	ppx	SL1344_2465 exopolyphosphatase 2614724:2616265 forward MW:58145	58108	0	0	0	1.64043e-05	0	-5.20945	-5.20945
SL1344_2468	0	SL1344_2468 conserved hypothetical inner membrane protein 2618927:2619118 forward MW:7446	7442	0	0	0	3.70471e-06	0	0	0
SL1344_2471	guaA	SL1344_2471 GMP synthase [glutamine-hydrolyzing] 2620521:2622098 reverse MW:58701	58663	0	0	0	0	0	-10.7549	-10.7549
SL1344_2472	guaB	SL1344_2472 inosine-5~-monophosphate dehydrogenase 2622168:2623634 reverse MW:51949	51916	0	0	0	0.000172792	-9.31741	-11.2186	-1.90115
SL1344_2473	xseA	SL1344_2473 Probable exodeoxyribonuclease VII large subunit 2623795:2625144 forward MW:50614	50582	0	0	6.3808e-05	0.000238315	0	0	0
SL1344_2475	ratB	SL1344_2475 hypothetical outer membrane protein (RatB) (pseudogene) 2632119:2639425 reverse MW:257583	257421	0	0	0	0	0	0	0
SL1344_2481	engA	SL1344_2481 GTP-binding protein engA. 2649173:2650645 reverse MW:54972	54938	0	0	0	0	-8.40088	-7.45121	0.949668
SL1344_2482	yfgL	SL1344_2482 hypothetical lipoprotein 2650764:2651942 reverse MW:41942	41916	0	0	3.37611e-05	1.7513e-05	-10.0084	-8.7039	1.30453
SL1344_2483	yfgM	SL1344_2483 hypothetical membrane protein 2651953:2652573 reverse MW:22133	22119	0	0	0.000103035	4.16891e-05	0	0	0
SL1344_2484	hisS	SL1344_2484 Histidyl-tRNA synthetase 2652587:2653861 reverse MW:46927	46898	0	0	0	0	-6.39232	-6.08746	0.304855
SL1344_2485	gcpE	SL1344_2485 4-hydroxy-3-methylbut-2-en-1-yl diphosphate synthase 2653972:2655090 reverse MW:40554	40528	0	7.86884e-07	6.72473e-05	5.44181e-05	-9.37504	-8.9542	0.420843
SL1344_2486	yfgA	SL1344_2486 hypothetical DNA-binding protein 2655117:2656121 reverse MW:35659	35637	0	0	6.64152e-05	4.96106e-05	0	-7.91289	-7.91289
SL1344_2487	yfgB	SL1344_2487 conserved hypothetical protein 2656413:2657579 reverse MW:43510	43482	0	0	0	2.40838e-05	0	-5.2854	-5.2854
SL1344_2488	ndk	SL1344_2488 nucleoside diphosphate kinase (ndk) 2657786:2658217 reverse MW:15521	15512	0	0	0	3.88111e-06	-3.57635	-5.93832	-2.36197
SL1344_2491	0	SL1344_2491 hypothetical anaerobic reductase component 2660003:2660632 reverse MW:22533	22519	0	2.82579e-06	3.33641e-05	0.000171686	0	0	0
SL1344_2492	0	SL1344_2492 dimethyl sulfoxide reductase 2660629:2663007 reverse MW:87688	87632	0	0	0	0	0	0	0
SL1344_2494	0	SL1344_2494 hypothetical lipoprotein 2665479:2670413 reverse MW:179677	179564	0	0	0	0	0	-7.32193	-7.32193
SL1344_2495	sseA	SL1344_2495 hypothetical thiosulfate sulfurtransferase 2670622:2671464 forward MW:30832	30812	0	0	0	1.60275e-05	2.80735	-5.14684	-7.9542
SL1344_2497	sseB	SL1344_2497 SseB protein 2672948:2673733 reverse MW:28955	28937	0	7.38547e-07	0	2.47519e-05	0	0	0
SL1344_2498	pepB	SL1344_2498 Peptidase B 2673834:2675117 reverse MW:46355	46326	0	0	0	0	0	-7.84549	-7.84549
SL1344_2499	yfhJ	SL1344_2499 conserved hypothetical protein 2675364:2675564 reverse MW:7685	7681	0	0	0	2.30376e-05	0	0	0
SL1344_2500	fdx	SL1344_2500 ferredoxin 2675576:2675911 reverse MW:12388	12381	0	0	0	0	-5.36632	-2.35755	3.00877
SL1344_2501	hscA	SL1344_2501 Chaperone protein hscA 2675913:2677763 reverse MW:65651	65610	0	7.71591e-07	3.29702e-05	4.10466e-06	-8.39232	-8.06609	0.326228
SL1344_2502	hscB	SL1344_2502 Co-chaperone protein hscB 2677776:2678291 reverse MW:19980	19968	0	0	3.35995e-05	2.67712e-05	0	0	0
SL1344_2503	iscA	SL1344_2503 conserved hypothetical protein 2678487:2678810 reverse MW:11504	11497	0	0	0	0	0	0	0
SL1344_2504	nifU	SL1344_2504 NifU-like protein 2678839:2679225 reverse MW:13820	13812	0	0	0	0	0	-6.53916	-6.53916
SL1344_2505	iscS	SL1344_2505 Cysteine desulfurase 2679253:2680467 reverse MW:45079	45050	0	0	0	9.33427e-06	0	-8.16491	-8.16491
SL1344_2506	yfhP	SL1344_2506 conserved hypothetical protein 2680648:2681142 reverse MW:17390	17380	0	0	0	2.87219e-05	-8.32193	0	8.32193
SL1344_2507	0	SL1344_2507 hypothetical RNA methyltransferase 2681302:2682033 reverse MW:26613	26597	0	0	3.20416e-05	0	0	0	0
SL1344_2508	suhB	SL1344_2508 extragenic suppressor protein SuhB 2682152:2682955 forward MW:29158	29140	0	0	0	0	0	-7.56224	-7.56224
SL1344_2510	asrA	SL1344_2510 anaerobic sulfite reductase subunit A 2684160:2685203 forward MW:39680	39654	0	0	0	1.89499e-05	0	0	0
SL1344_2511	asrB	SL1344_2511 anaerobic sulfite reductase subunit B 2685207:2686025 forward MW:30609	30589	0	0	0	0	0	0	0
SL1344_2512	asrC	SL1344_2512 anaerobic sulfite reductase subunit C 2686036:2687049 forward MW:37291	37266	0	0	0	0	0	0	0
SL1344_2517	glyA	SL1344_2517 serine hydroxymethyltransferase 2691398:2692651 reverse MW:45455	45426	0	0	0	0	-6.82767	-7.21974	-0.392068
SL1344_2518	hmpA	SL1344_2518 flavohemoprotein (haemoglobin-like protein) 2692976:2694166 forward MW:44018	43990	0	3.37539e-06	0.000386167	0.000506828	2.80735	-5.03814	-7.84549
SL1344_2519	cadC	SL1344_2519 transcriptional activator cadC 2694348:2695892 forward MW:58231	58195	0	7.38092e-07	0	2.29978e-05	0	0	0
SL1344_2520	cadB	SL1344_2520 probable cadaverine/lysine antiporter 2696253:2697584 forward MW:46678	46647	0	0	0	0	0	0	0
SL1344_2521	cadA	SL1344_2521 lysine decarboxylase 2697730:2699811 forward MW:78732	78681	0	0	0	0	0	-9.63118	-9.63118
SL1344_2523	glnB	SL1344_2523 nitrogen regulatory protein p-II 2701376:2701714 reverse MW:12425	12418	0	0	0	7.92583e-05	0	-7.32193	-7.32193
SL1344_2524	yfhA	SL1344_2524 hypothetical transcriptional regulator 2701791:2703128 reverse MW:49359	49328	0	0	0	1.59927e-05	0	-6.35755	-6.35755
SL1344_2525	yfhG	SL1344_2525 hypothetical membrane protein 2703125:2703889 reverse MW:28346	28328	0	0	0	8.17683e-06	0	0	0
SL1344_2527	purG	SL1344_2527 Phosphoribosylformylglycinamidine synthase 2705971:2709858 reverse MW:141473	141383	0	0	0	0	-9.17742	-10.6312	-1.45376
SL1344_2530	yfhC	SL1344_2530 conserved hypothetical protein 2711709:2712260 reverse MW:20288	20275	0	0	5.79228e-05	0.000158646	0	0	0
SL1344_2531	yfhB	SL1344_2531 hypothetical membrane protein 2712285:2712920 reverse MW:24447	24432	0	0	0	0	0	0	0
SL1344_2533	murQ	SL1344_2533 hypothetical phophosugar binding protein 2714296:2715189 reverse MW:30874	30855	0	0	0	0	0	0	0
SL1344_2534	yfhH	SL1344_2534 hypothetical transcriptional regulator 2715305:2716153 forward MW:30926	30906	0	0	0	0	0	0	0
SL1344_2539	acpS	SL1344_2539 Holo-[acyl-carrier-protein] synthase 2719779:2720159 reverse MW:14070	14061	0	0	0	0	0	0	0
SL1344_2540	pdxJ	SL1344_2540 Pyridoxal phosphate biosynthetic protein pdxJ 2720159:2720890 reverse MW:26343	26327	0	0	0	0	0	-8.96578	-8.96578
SL1344_2542	era	SL1344_2542 GTP-binding protein era homolog. 2721642:2722547 reverse MW:33882	33861	0	0	0	5.00191e-05	0	0	0
SL1344_2543	rnc	SL1344_2543 Ribonuclease III 2722544:2723146 reverse MW:22397	22384	0	0	0	0	0	0	0
SL1344_2544	lepB	SL1344_2544 signal peptidase I 2723498:2724472 reverse MW:35778	35755	0	0	0	0	-5.36632	-4.04439	1.32193
SL1344_2545	lepA	SL1344_2545 GTP-binding protein LepA 2724489:2726288 reverse MW:66539	66496	0	7.71325e-07	3.29588e-05	1.32216e-05	-8.41363	-7.78136	0.632268
SL1344_2574	0	SL1344_2574 predicted bacteriophage protein 2756009:2756410 forward MW:14754	14746	0	0	3.40532e-05	2.20453e-05	0	-5.35755	-5.35755
SL1344_2577	0	SL1344_2577 hypothetical bacteriophage encoded virulence protein 2758157:2758843 forward MW:25783	25767	0	0	0	4.13661e-06	0	0	0
SL1344_2584	0	SL1344_2584 hypothetical damage-inducible protein 2763222:2763455 reverse MW:8808	8803	0	0	0	0	0	0	0
SL1344_2585	0	SL1344_2585 predicted bacteriophage protein 2763714:2763905 reverse MW:7609	7605	0	0	0	0	0	0	0
SL1344_2593	ybeM	SL1344_2593 hypothetical DNA-binding protein 2768450:2768833 forward MW:14180	14171	0	0	0	0	0	0	0
SL1344_2594	0	SL1344_2594 predicted bacteriophage protein 2768985:2770070 forward MW:39937	39912	0	0	0	0	0	-7.87036	-7.87036
SL1344_2597	recE	SL1344_2597 exodeoxyribonuclease VIII 2771095:2774295 forward MW:119222	119147	0	0	0	2.34104e-05	0	0	0
SL1344_2602	rseB	SL1344_2602 sigma-E factor regulatory protein RseB precursor 2778203:2779159 reverse MW:35768	35745	0	0	0	0	0	-5.35755	-5.35755
SL1344_2603	rseA	SL1344_2603 sigma-E factor negative regulatory protein 2779159:2779809 reverse MW:24222	24207	0	0	0	4.1021e-06	-8.33092	0	8.33092
SL1344_2604	rpoE	SL1344_2604 RNA polymerase sigma-E factor (sigma-24) 2779841:2780416 reverse MW:21712	21698	0	0	3.22312e-05	0	0	0	0
SL1344_2606	yfiC	SL1344_2606 conserved hypothetical protein 2782448:2783185 reverse MW:27307	27290	0	0	0	0	0	0	0
SL1344_2607	srmB	SL1344_2607 ATP-dependent RNA helicase SrmB 2783316:2784650 forward MW:50057	50026	0	0	0	0	0	-7.84549	-7.84549
SL1344_2610	yfiD	SL1344_2610 conserved hypothetical protein 2786319:2786702 reverse MW:14344	14335	0	0	0	2.29639e-05	0	-7.85798	-7.85798
SL1344_2611	ung	SL1344_2611 Uracil-DNA glycosylase 2787021:2787710 forward MW:25480	25464	0	0	0	2.3214e-05	0	0	0
SL1344_2612	yfiF	SL1344_2612 hypothetical RNA methyltransferase 2787826:2788863 reverse MW:38078	38054	0	0	0	0	-8.2854	-8.50779	-0.222392
SL1344_2613	trxC	SL1344_2613 thioredoxin 2 2789067:2789486 forward MW:15559	15550	0	0	3.11805e-05	3.63923e-05	0	0	0
SL1344_2615	yfiQ	SL1344_2615 hypothetical acyl-CoA synthetase 2790293:2792953 forward MW:97768	97706	0	0	0	0	0	0	0
SL1344_2616	pssA	SL1344_2616 CDP-diacylglycerol-serine O-phosphatidyltransferase 2793068:2794423 forward MW:52734	52701	0	0	0	0	0	-7	-7
SL1344_2618	kgtP	SL1344_2618 alpha-ketoglutarate permease 2794788:2796089 reverse MW:47234	47203	0	0	0	1.27679e-05	0	0	0
SL1344_2620	clpB	SL1344_2620 ClpB protein (heat shock protein f84.1) 2802529:2805102 reverse MW:95438	95378	0	0	0	0	-14.5817	-13.078	1.50369
SL1344_2621	yfiH	SL1344_2621 conserved hypothetical protein 2805232:2805963 reverse MW:26428	26411	0	0	0.00245197	0.000864701	0	0	0
SL1344_2622	rluD	SL1344_2622 ftsH suppressor protein SfhB 2805960:2806940 reverse MW:37101	37077	0	0	0	0	0	-6.40939	-6.40939
SL1344_2623	yfiO	SL1344_2623 outer membrane protein assembly complex subunit yfiO 2807072:2807809 forward MW:27826	27809	0	0	0	8.50991e-06	-8.29002	0	8.29002
SL1344_2624	yfiA	SL1344_2624 hypothetical sigma(54) modulation protein 2808081:2808419 forward MW:12652	12645	0	0	3.13307e-05	0	3	-5.43879	-8.43879
SL1344_2625	pheA	SL1344_2625 chorismate mutase-P/prephenate dehydratase 2808670:2809830 forward MW:42824	42797	0	7.88044e-07	0	3.46661e-05	0	-7.03342	-7.03342
SL1344_2627	tyrA	SL1344_2627 chorismate mutase/prephenate dehydrogenase 2810757:2811824 reverse MW:39947	39922	0	0	0	1.3097e-05	0	0	0
SL1344_2628	aroF	SL1344_2628 phospho-2-dehydro-3-deoxyheptonate aldolase, tyr-sensitive 2811888:2812958 reverse MW:38713	38689	0	0	0	0	-9.3966	-7.88874	1.50786
SL1344_2632	0	SL1344_2632 hypothetical exported protein 2816456:2816794 reverse MW:12347	12339	0	0	6.73641e-05	2.36797e-05	0	0	0
SL1344_2633	0	SL1344_2633 hypothetical repressor protein 2816803:2817648 reverse MW:30436	30417	0	0	0	0	0	-5.2854	-5.2854
SL1344_2638	0	SL1344_2638 predicted bacteriophage protein 2819253:2819480 forward MW:8510	8505	0	0	0	3.87851e-06	0	0	0
SL1344_2644	rpoB	SL1344_2644 predicted bacteriophage protein 2824931:2825620 forward MW:26268	26252	0	0	0	0	0	-5.32193	-5.32193
SL1344_2646	rpl19	SL1344_2646 50S ribosomal protein L19. Chloroplast 50S ribosomal protein L19. 2826061:2826408 reverse MW:13130	13122	0	0	0	4.01691e-06	3	-7.42941	-10.4294
SL1344_2647	trmD	SL1344_2647 tRNA (guanine-N1) methyltransferase 2826449:2827216 reverse MW:28348	28330	0	7.86318e-07	0	0.000137872	0	0	0
SL1344_2648	rimM	SL1344_2648 16S rRNA processing protein rimM. Probable 16S rRNA processing protein rimM. 2827261:2827809 reverse MW:20468	20455	0	0	0	0	0	0	0
SL1344_2649	rps16	SL1344_2649 30S ribosomal protein S16. Chloroplast 30S ribosomal protein S16. 2827828:2828076 reverse MW:9234	9229	0	0	0	0	0	-11.7215	-11.7215
SL1344_2650	ffh	SL1344_2650 signal recognition particle protein 2828390:2829751 reverse MW:49800	49767	0	0	0	0.000337742	0	-7.83289	-7.83289
SL1344_2654	grpE	SL1344_2654 heat shock protein GrpE (heat shock protein b25.3) (hsp24) 2832775:2833365 reverse MW:21841	21827	0	0	0	2.2845e-05	-6.43671	-2.39232	4.04439
SL1344_2655	ppnK	SL1344_2655 conserved hypothetical protein 2833488:2834366 forward MW:32584	32564	0	7.84772e-07	6.93024e-05	4.17478e-06	0	0	0
SL1344_2657	smpA	SL1344_2657 small protein A 2836262:2836600 forward MW:12345	12337	0	0	0	0	0	-6.55459	-6.55459
SL1344_2658	rnfH	SL1344_2658 conserved hypothetical protein 2836766:2837056 reverse MW:10806	10800	0	0	0	9.43863e-06	0	0	0
SL1344_2659	yfjG	SL1344_2659 conserved hypothetical protein 2837046:2837501 reverse MW:16872	16862	0	0	0	0	0	0	0
SL1344_2660	smpB	SL1344_2660 SsrA (tmRNA) -binding protein 2837672:2838154 forward MW:18232	18221	0	0	0	0	0	0	0
SL1344_2662	0	SL1344_2662 hypothetical type I secretion protein 2850307:2851716 forward MW:51448	51416	0	0	0	0	0	0	0
SL1344_2674	sopE	SL1344_2674 Type III secretion system effector protein, invasion-associated secreted protein-by rearranging the actin cytoskeleton and disrupting tight junctions 2863004:2863726 forward MW:26635	26619	0	0	0	0	0	0	0
SL1344_2695	smf	SL1344_2695 hypothetical competence protein 2877245:2878222 reverse MW:35842	35820	0	0	0	0	0	0	0
SL1344_2696	0	SL1344_2696 predicted bacteriophage protein 2878212:2878793 reverse MW:21374	21361	0	0	0	0	0	0	0
SL1344_2697	0	SL1344_2697 predicted bacteriophage protein 2879070:2879447 reverse MW:14520	14512	0	0	0	0	0	0	0
SL1344_2698	0	SL1344_2698 predicted bacteriophage protein 2879425:2880480 reverse MW:40826	40799	0	0	0	0	0	-5.39232	-5.39232
SL1344_2708	cI	SL1344_2708 bacteriophage repressor protein cI 2886920:2887495 forward MW:20556	20544	0	0	0	4.16186e-06	0	0	0
SL1344_2713	rfbU	SL1344_2713 conserved hypothetical protein 2891273:2892970 reverse MW:65211	65170	0	0	0	0	0	0	0
SL1344_2714	0	SL1344_2714 hypothetical protein 2892957:2893190 reverse MW:8606	8601	0	0	0	0	0	0	0
SL1344_2715	0	SL1344_2715 hypothetical protein 2893177:2893725 reverse MW:20602	20590	0	0	0	0	0	0	0
SL1344_2723	0	SL1344_2723 bacteriophage integrase (pseudogene) 2900734:2901979 forward MW:48013	47982	0	0	0	0	0	0	0
SL1344_2730	0	SL1344_2730 hypothetical ATPase 2908638:2909921 forward MW:49832	49801	0	0	0	0	0	-6.98868	-6.98868
SL1344_2732	0	SL1344_2732 hypothetical transcriptional regulator 2910939:2911229 reverse MW:10579	10573	0	0	0	1.27004e-05	0	-5.39232	-5.39232
SL1344_2738	0	SL1344_2738 hypothetical hexulose 6 phosphate synthase 2914975:2916177 forward MW:46518	46489	0	0	0	4.17934e-06	0	0	0
SL1344_2752	0	SL1344_2752 hypothetical DNA/RNA helicase 2930996:2932978 reverse MW:75999	75951	0	0	0	0	0	-6.26679	-6.26679
SL1344_2756	flaG	SL1344_2756 flagellin 2935806:2937326 reverse MW:52536	52504	0	0	0	7.74768e-06	0	-11.3129	-11.3129
SL1344_2758	iroB	SL1344_2758 hypothetical glycosyltransferase 2938953:2940068 forward MW:40105	40080	0	0	0	0.000254404	0	-8.48382	-8.48382
SL1344_2759	iroC	SL1344_2759 hypothetical ABC transporter protein 2940149:2943802 forward MW:131666	131581	0	0	0	3.57745e-05	0	-9.46148	-9.46148
SL1344_2760	iroD	SL1344_2760 hypothetical ferric enterochelin esterase 2943912:2945156 forward MW:45460	45432	0	0	0	7.04678e-05	0	-7.49185	-7.49185
SL1344_2762	iroN	SL1344_2762 TonB-dependent outer membrane siderophore receptor protein 2946165:2948345 reverse MW:79373	79324	0	0	0	1.79586e-05	0	-15.6367	-15.6367
SL1344_2764	virK	SL1344_2764 virulence protein 2950949:2951878 forward MW:36101	36078	0	0	0	0.00509477	0	0	0
SL1344_2765	mig-14	SL1344_2765 hypothetical transcriptional regulator 2952171:2953067 forward MW:35212	35189	0	0	0	0	0	0	0
SL1344_2770	0	SL1344_2770 hypothetical exported protein 2957166:2958143 forward MW:35480	35457	0	0	0	0	0	-8.24317	-8.24317
SL1344_2775	gabD	SL1344_2775 succinate-semialdehyde dehydrogenase 2962710:2964158 forward MW:51848	51816	0	0	0	3.02918e-05	0	-6.30378	-6.30378
SL1344_2776	gabT	SL1344_2776 4-aminobutyrate aminotransferase 2964173:2965456 forward MW:45637	45607	0	0	0	7.92854e-06	0	-6.33985	-6.33985
SL1344_2779	ygaU	SL1344_2779 conserved hypothetical protein 2967727:2968176 reverse MW:16121	16111	0	0	0	8.14156e-06	0	0	0
SL1344_2781	0	SL1344_2781 hypothetical transcriptional regulator 2968677:2968916 forward MW:8781	8776	0	0	0	0	0	0	0
SL1344_2782	ygaP	SL1344_2782 conserved hypothetical protein 2968926:2969453 forward MW:18593	18582	0	0	0	0	0	0	0
SL1344_2783	stpA	SL1344_2783 DNA-binding protein StpA 2969801:2970202 reverse MW:15488	15478	0	0	0	0	4.08746	-6.67989	-10.7674
SL1344_2786	ygaM	SL1344_2786 conserved hypothetical protein 2971885:2972223 forward MW:12360	12352	0	1.7066e-06	0	0.00017427	0	0	0
SL1344_2788	0	SL1344_2788 conserved hypothetical protein 2973730:2974161 forward MW:16088	16078	0	0	0	0	0	0	0
SL1344_2792	nrdE	SL1344_2792 ribonucleoside-diphosphate reductase 2 alpha chain 2975058:2977202 forward MW:80597	80546	0	0	0	0	0	-5.35755	-5.35755
SL1344_2794	proV	SL1344_2794 glycine betaine/l-proline transport ATP-binding protein 2978527:2979729 forward MW:44125	44097	0	0	0	4.1082e-06	0	0	0
SL1344_2795	proW	SL1344_2795 glycine betaine/L-proline transport system permease protein P 2979722:2980786 forward MW:37727	37702	0	0	0	0	0	0	0
SL1344_2796	proX	SL1344_2796 glycine betaine-binding periplasmic protein precursor 2980856:2981851 forward MW:36153	36130	0	0	0	0	0	-7.06609	-7.06609
SL1344_2798	emrR	SL1344_2798 hypothetical transcriptional regulator 2983697:2984227 forward MW:20537	20524	0	0	0	1.33602e-05	0	0	0
SL1344_2799	emrA	SL1344_2799 multidrug resistance protein A 2984354:2985526 forward MW:42501	42475	0	0	0	0	0	0	0
SL1344_2802	luxS	SL1344_2802 S-ribosylhomocysteinase 2988846:2989361 reverse MW:19308	19296	0	0	0	0	-9.47371	0	9.47371
SL1344_2803	gshA	SL1344_2803 Glutamate--cysteine ligase 2989511:2991067 reverse MW:58384	58347	0	0	7.11479e-05	0	0	-6.35755	-6.35755
SL1344_2805	yqaB	SL1344_2805 conserved hypothetical protein 2991566:2992132 reverse MW:20721	20708	0	0	0	8.18388e-06	-8.31288	0	8.31288
SL1344_2806	csrA	SL1344_2806 carbon storage regulator 2993527:2993712 reverse MW:6856	6852	0	0	3.18143e-05	0	0	-7.67243	-7.67243
SL1344_2807	alaS	SL1344_2807 Alanyl-tRNA synthetase 2993947:2996577 reverse MW:95900	95840	0	0	0	2.03574e-05	-11.4752	-11.5063	-0.0310808
SL1344_2809	recA	SL1344_2809 RecA protein 2997430:2998491 reverse MW:37944	37921	0	0	0.000284667	0.000290852	-8.40271	-6.974	1.4287
SL1344_2810	ygaD	SL1344_2810 conserved hypothetical protein 2998576:2999073 reverse MW:17553	17543	0	7.27157e-07	0.00023692	8.80034e-05	0	0	0
SL1344_2811	mltB	SL1344_2811 membrane-bound lytic transglycosylase B precursor 2999551:3000630 reverse MW:39981	39956	0	0	0	0	0	0	0
SL1344_2813	srlE	SL1344_2813 PTS system, glucitol/sorbitol-specific IIBC component 3001444:3002415 forward MW:33713	33692	0	0	0	0	0	0	0
SL1344_2815	gutD	SL1344_2815 sorbitol-6-phosphate 2-dehydrogenase (glucitol-6-phosphate dehydrogenase) 3002801:3003580 forward MW:27876	27858	0	0	0	0	0	0	0
SL1344_2817	srlR	SL1344_2817 glucitol operon repressor 3004213:3004986 forward MW:28062	28044	0	0	0	0	0	0	0
SL1344_2818	gutQ	SL1344_2818 hypothetical phosphosugar binding protein 3004979:3005944 forward MW:34135	34113	0	0	0	0	-8.29462	0	8.29462
SL1344_2819	norR	SL1344_2819 transcriptional activator of norVW. NO responsive 3005941:3007461 reverse MW:55375	55340	0	0	3.14452e-05	0	0	0	0
SL1344_2822	hydA	SL1344_2822 hydrogenase maturation protein 3010313:3012553 reverse MW:81102	81050	0	0	0	0	0	0	0
SL1344_2823	hydN	SL1344_2823 electron transport protein 3012699:3013244 reverse MW:19531	19519	0	0	0	0	0	0	0
SL1344_2825	hycI	SL1344_2825 hydrogenase 3 maturation protease 3014281:3014751 reverse MW:17042	17031	0	0	0	0	0	0	0
SL1344_2826	hycH	SL1344_2826 formate hydrogenlyase maturation protein 3014744:3015154 reverse MW:15594	15585	0	0	0	0	0	0	0
SL1344_2827	hycG	SL1344_2827 formate hydrogenlyase subunit 7 3015151:3015918 reverse MW:27967	27949	0	0	0	0	0	0	0
SL1344_2828	hycF	SL1344_2828 formate hydrogenlyase subunit 6 3015918:3016460 reverse MW:20324	20311	0	0	0	0	0	0	0
SL1344_2829	hycE	SL1344_2829 formate hydrogenlyase subunit 5 3016470:3018179 reverse MW:65021	64979	0	0	0	0	0	0	0
SL1344_2830	hycD	SL1344_2830 formate hydrogenlyase subunit 4 3018197:3019120 reverse MW:33056	33035	0	0	0	0	0	0	0
SL1344_2831	hycC	SL1344_2831 formate hydrogenlyase subunit 3 3019123:3020949 reverse MW:63760	63718	0	0	0	0	0	0	0
SL1344_2832	hycB	SL1344_2832 formate hydrogenlyase subunit 2 3020949:3021557 reverse MW:21712	21698	0	0	0	0	0	0	0
SL1344_2833	hycA	SL1344_2833 formate hydrogenlyase regulatory protein 3021703:3022164 reverse MW:17791	17780	0	0	0	0	0	0	0
SL1344_2834	hypA	SL1344_2834 Probable hydrogenase nickel incorporation protein hypA. 3022374:3022730 forward MW:13485	13477	0	0	0	0	0	0	0
SL1344_2835	hypB	SL1344_2835 hydrogenase isoenzymes formation protein HypB 3022799:3023671 forward MW:31393	31373	0	0	0	0	0	-5.32193	-5.32193
SL1344_2837	hypD	SL1344_2837 hydrogenase isoenzymes formation protein HypD 3023934:3025055 forward MW:41559	41532	0	0	0	4.00041e-06	0	0	0
SL1344_2838	hypE	SL1344_2838 hydrogenase isoenzymes formation protein HypE 3025052:3026062 forward MW:35322	35300	0	0	0	0	0	0	0
SL1344_2839	fhlA	SL1344_2839 transcriptional activator of the formate hydrogenlyase system 3026281:3028359 forward MW:78253	78204	0	0	0	0	0	0	0
SL1344_2841	sitA	SL1344_2841 Iron transport protein, periplasmic-binding protein 3028947:3029864 forward MW:33722	33702	0	0	0	0	0	-11.5236	-11.5236
SL1344_2842	sitB	SL1344_2842 Iron transport protein, ATP-binding component 3029861:3030682 forward MW:29782	29763	0	0	0	0.00029437	0	-8.61102	-8.61102
SL1344_2845	avrA	SL1344_2845 Type III secretion system effector protein-regulator of Salmonella-induced inflammatory response 3032477:3033382 reverse MW:33632	33610	0	0	0	3.90897e-05	0	0	0
SL1344_2846	sprB	SL1344_2846 AraC-family transcriptional regulator 3033543:3034298 reverse MW:28589	28571	0	0	0	0	0	0	0
SL1344_2847	hilC	SL1344_2847 AraC-family transcriptional regulator 3034683:3035570 reverse MW:33883	33861	0	0	0	0	0	0	0
SL1344_2849	orgA	SL1344_2849 oxygen-regulated invasion protein 3036364:3037044 reverse MW:26462	26446	0	0	0	0	0	0	0
SL1344_2850	orgA	SL1344_2850 oxygen-regulated invasion protein 3037001:3037600 reverse MW:22832	22817	0	0	0	0	0	0	0
SL1344_2851	prgK	SL1344_2851 type III secretion system apparatus 3037572:3038330 reverse MW:28210	28193	0	0	0	0	0	-5.32193	-5.32193
SL1344_2852	prgJ	SL1344_2852 type III secretion system apparatus 3038327:3038632 reverse MW:10926	10920	0	0	0	3.95441e-06	0	0	0
SL1344_2853	prgI	SL1344_2853 type III secretion system apparatus 3038651:3038893 reverse MW:8856	8851	0	0	0	0	0	0	0
SL1344_2854	prgH	SL1344_2854 type III secretion apparatus component 3038918:3040096 reverse MW:44460	44432	0	0	0	0	0	0	0
SL1344_2855	hilD	SL1344_2855 AraC-family transcriptional regulator 3040412:3041341 forward MW:35218	35196	0	0	0	0	0	0	0
SL1344_2856	hilA	SL1344_2856 invasion protein regulator 3042432:3044093 forward MW:63041	63001	0	0	0	0	0	0	0
SL1344_2858	sptP	SL1344_2858 Type III secretion system effector protein, Inhibits Cdc42 and Rac1 by its GAP activity and MAPK signalling and IL-8 secretion through its tyrosine phosphatase activity 3044647:3046278 reverse MW:60048	60010	0	0	0	0	0	0	0
SL1344_2859	sicP	SL1344_2859 chaperone (associated with virulence) 3046265:3046657 reverse MW:14467	14458	0	0	0	0	0	0	0
SL1344_2861	sipA	SL1344_2861 pathogenicity island 1 Type III secretion system effector protein-involved in actin bundling and polymerisation leading to epithelial cell invasion and formation of the SCV 3047255:3049312 reverse MW:73942	73897	0	0	0	0	0	-5.24793	-5.24793
SL1344_2862	sipD	SL1344_2862 pathogenicity island 1 Type III secretion system apparatus-part of the Translocon 3049331:3050362 reverse MW:37112	37090	0	0	0	3.76908e-06	0	0	0
SL1344_2863	sipC	SL1344_2863 pathogenicity island 1 Type III secretion system effector protein-involved in bacterial entry by actin bundling and part of the Translocon 3050433:3051662 reverse MW:42983	42957	0	0	0	0	0	-6.35755	-6.35755
SL1344_2864	sipB	SL1344_2864 pathogenicity island 1 Type III secretion system effector protein 3051690:3053471 reverse MW:62451	62412	0	0	0	8.21624e-06	0	-6.32193	-6.32193
SL1344_2865	sicA	SL1344_2865 type III secretion-associated chaperone 3053474:3053971 reverse MW:19220	19208	0	0	0	7.95822e-06	0	0	0
SL1344_2866	spaS	SL1344_2866 type III secretion system secretory apparatus 3054109:3055179 reverse MW:40093	40068	0	0	0	0	0	0	0
SL1344_2868	spaQ	SL1344_2868 type III secretion system secretory apparatus 3055961:3056221 reverse MW:9359	9353	0	0	0	0	0	0	0
SL1344_2869	spaP	SL1344_2869 type III secretion system secretory apparatus 3056247:3056921 reverse MW:25232	25215	0	0	0	0	0	0	0
SL1344_2870	spaO	SL1344_2870 surface presentation of antigens protein (associated with type III secretion and virulence) 3056911:3057822 reverse MW:33794	33772	0	0	0	0	0	0	0
SL1344_2871	invJ	SL1344_2871 surface presentation of antigens protein (associated with type III secretion and virulence) 3057822:3058832 reverse MW:36437	36415	0	0	0	0	0	0	0
SL1344_2873	invC	SL1344_2873 secretory apparatus ATP synthase (associated with virulence) 3059253:3060548 reverse MW:47611	47581	0	0	0	0	0	0	0
SL1344_2874	invB	SL1344_2874 chaperone protein for type III secretion system effectors 3060545:3060952 reverse MW:14919	14909	0	0	0	0	0	-5.39232	-5.39232
SL1344_2875	invA	SL1344_2875 secretory apparatus of type III secretion system 3060976:3063033 reverse MW:76056	76007	0	0	0	4.18234e-06	0	0	0
SL1344_2876	invE	SL1344_2876 cell invasion protein 3063058:3064176 reverse MW:42421	42395	0	0	0	0	0	0	0
SL1344_2877	invG	SL1344_2877 type III secretion system secretory apparatus 3064173:3065861 reverse MW:61766	61727	0	0	0	0	0	-8.33539	-8.33539
SL1344_2878	invF	SL1344_2878 AraC-family regulatory protein 3065858:3066508 reverse MW:24389	24374	0	0	0	3.22706e-05	0	0	0
SL1344_2879	invH	SL1344_2879 outer membrane lipoprotein 3066965:3067408 forward MW:16454	16444	0	0	0	0	0	-5.39232	-5.39232
SL1344_2882	0	SL1344_2882 salmonella pathogenicity island 1 protein 3068893:3069219 reverse MW:12922	12914	0	0	0	4.19359e-06	0	0	0
SL1344_2884	0	SL1344_2884 salmonella pathogenicity island 1 protein 3069908:3070198 forward MW:10678	10672	0	0	0	0	0	0	0
SL1344_2885	0	SL1344_2885 salmonella pathogenicity island 1 protein 3070195:3070722 forward MW:19070	19058	0	0	0	0	0	0	0
SL1344_2888	mutS	SL1344_2888 DNA mismatch repair protein 3072897:3075422 forward MW:93757	93698	0	0	0	0	-9.39232	-8.48382	0.908502
SL1344_2893	0	SL1344_2893 conserved hypothetical protein 3079618:3080568 reverse MW:34176	34155	0	0	6.7177e-05	3.58426e-05	0	0	0
SL1344_2898	ygbI	SL1344_2898 DeoR-family trancriptional regulator 3084385:3085149 forward MW:27425	27407	0	0	0	0	0	0	0
SL1344_2899	slyA	SL1344_2899 hypothetical regulatory protein 3085168:3085572 reverse MW:15617	15607	0	0	0	0	0	0	0
SL1344_2904	nlpD	SL1344_2904 lipoprotein NlpD precursor 3089110:3090243 reverse MW:39641	39617	0	0	0	0	0	-6.42626	-6.42626
SL1344_2905	pcm	SL1344_2905 Protein-L-isoaspartate O-methyltransferase 3090419:3091045 reverse MW:23192	23177	0	0	0	8.58773e-06	0	0	0
SL1344_2906	surE	SL1344_2906 Acid phosphatase surE 3091039:3091800 reverse MW:26980	26964	0	0	0	0	0	0	0
SL1344_2907	truD	SL1344_2907 tRNA pseudouridine synthase D 3091781:3092830 reverse MW:39333	39308	0	0	0	0	0	-6.40939	-6.40939
SL1344_2908	ispF	SL1344_2908 2-C-methyl-D-erythritol 2,4-cyclodiphosphate synthase 3092827:3093306 reverse MW:16899	16889	0	0	0	8.52075e-06	0	0	0
SL1344_2909	ispD	SL1344_2909 2-C-methyl-D-erythritol 4-phosphate cytidylyltransferase 3093306:3094016 reverse MW:25755	25739	0	0	0	0	0	0	0
SL1344_2910	ftsB	SL1344_2910 Cell division protein ftsB homolog. 3094035:3094346 reverse MW:11575	11568	0	0	0	0	0	-5.35755	-5.35755
SL1344_2915	iap	SL1344_2915 alkaline phosphatase isozyme conversion protein 3098111:3099157 forward MW:38230	38207	0	0	0	4.13014e-06	0	0	0
SL1344_2918	ygcH	SL1344_2918 conserved hypothetical protein 3101466:3102116 reverse MW:24908	24893	0	0	0	0	0	0	0
SL1344_2920	yghJ	SL1344_2920 hypothetical protein 3102855:3103913 reverse MW:38668	38644	0	0	0	0	0	0	0
SL1344_2924	sopD	SL1344_2924 Type III secretion system effector protein-involved in bacterial invasion, also promotes secretion or accumulation of fluid 3109160:3110113 forward MW:36141	36118	0	0	0	0	0	0	0
SL1344_2928	ptpS	SL1344_2928 6-pyruvoyl tetrahydrobiopterin synthase 3114946:3115308 forward MW:13617	13609	0	0	0	0	0	0	0
SL1344_2930	ygcF	SL1344_2930 conserved hypothetical protein 3118020:3118691 reverse MW:24993	24978	0	0	0	0	0	0	0
SL1344_2931	eno	SL1344_2931 Enolase 3118827:3120125 reverse MW:45599	45570	0	0	0	0	-6.81137	-7.53795	-0.726572
SL1344_2932	pyrG	SL1344_2932 CTP synthase 3120208:3121845 reverse MW:60122	60084	0	6.4445e-06	0.000718774	0.00118945	-4.26679	-4.5812	-0.314414
SL1344_2933	mazG	SL1344_2933 conserved hypothetical protein 3122073:3122873 reverse MW:30831	30811	0	1.5842e-06	3.07696e-05	3.83069e-05	0	0	0
SL1344_2937	relA	SL1344_2937 GTP pyrophosphokinase 3124343:3126577 reverse MW:84115	84061	0	0	0	0	0	-8.00562	-8.00562
SL1344_2938	rumA	SL1344_2938 hypothetical RNA methyltransferase 3126629:3127924 reverse MW:47768	47738	0	0	0	2.57249e-05	0	0	0
SL1344_2939	barA	SL1344_2939 sensor protein 3127982:3130738 forward MW:102571	102504	0	0	0	0	0	0	0
SL1344_2941	gudD	SL1344_2941 probable glucarate dehydratase 1 3132002:3133342 reverse MW:49174	49143	0	0	0	0	0	-5.24793	-5.24793
SL1344_2944	0	SL1344_2944 conserved hypothetical protein 3136539:3136988 reverse MW:16249	16239	0	0	0	3.75977e-06	0	-5.35755	-5.35755
SL1344_2947	syd	SL1344_2947 syd protein 3138730:3139275 reverse MW:20518	20505	0	0	0	4.14131e-06	0	0	0
SL1344_2948	queF	SL1344_2948 conserved hypothetical protein 3139344:3140192 forward MW:32673	32653	0	0	0	0	0	-5.39232	-5.39232
SL1344_2949	ygdH	SL1344_2949 conserved hypothetical protein 3140305:3141669 forward MW:50754	50721	0	0	0	4.16362e-06	0	-9.04985	-9.04985
SL1344_2950	sdaC	SL1344_2950 hypothetical serine transporter 3142234:3143523 forward MW:46860	46829	0	0	0	5.30334e-05	0	-5.39232	-5.39232
SL1344_2951	sdaB	SL1344_2951 L-serine dehydratase 2 (L-serine deaminase 2) 3143582:3144949 forward MW:48910	48879	0	0	0	4.17985e-06	0	0	0
SL1344_2952	exo	SL1344_2952 5~-3~ exonuclease 3145060:3145875 forward MW:30583	30564	0	0	0	0	0	0	0
SL1344_2953	fucO	SL1344_2953 1,2-propanediol oxidoreductase (lactaldehyde reductase) 3145967:3147115 reverse MW:40538	40513	0	0	0	0	0	0	0
SL1344_2954	fucA	SL1344_2954 fuculose-1-phosphate aldolase 3147132:3147779 reverse MW:23721	23706	0	0	0	0	0	0	0
SL1344_2956	fucI	SL1344_2956 L-fuculose isomerase 3149682:3151457 forward MW:64771	64729	0	0	0	0	0	-6.37504	-6.37504
SL1344_2958	fucU	SL1344_2958 fuscose operon fucU protein 3152978:3153400 forward MW:15280	15271	0	0	0	8.25367e-06	0	-5.35755	-5.35755
SL1344_2959	fucR	SL1344_2959 l-fucose operon activator 3153458:3154168 forward MW:26444	26428	0	0	0	4.08917e-06	0	0	0
SL1344_2960	ygdE	SL1344_2960 conserved hypothetical protein 3154227:3155327 reverse MW:42020	41993	0	0	0	0	0	0	0
SL1344_2962	gcvA	SL1344_2962 regulatory protein for glycine cleavage pathway 3155734:3156651 reverse MW:34390	34369	0	0	0	0	0	0	0
SL1344_2963	ygdI	SL1344_2963 possible lipoprotein 3156998:3157225 reverse MW:8126	8121	0	0	0	0	-8.41363	-6.70044	1.71319
SL1344_2964	csdA	SL1344_2964 possible aminotransferase 3157418:3158623 forward MW:43169	43142	0	0	3.41025e-05	1.03552e-05	0	0	0
SL1344_2965	ygdK	SL1344_2965 conserved hypothetical protein 3158623:3159066 forward MW:16022	16012	0	0	0	0	0	-5.35755	-5.35755
SL1344_2967	ygdL	SL1344_2967 conserved hypothetical protein 3160305:3161111 reverse MW:28651	28633	0	0	0	4.08342e-06	0	0	0
SL1344_2968	mltA	SL1344_2968 membrane-bound lytic murein transglycosylase A precursor 3161221:3162318 reverse MW:40270	40245	0	0	0	0	0	0	0
SL1344_2969	amiC	SL1344_2969 N-acetylmuramoyl-L-alanine amidase 3162818:3164071 reverse MW:45614	45585	0	0	0	0	0	0	0
SL1344_2970	argA	SL1344_2970 Amino-acid acetyltransferase 3164304:3165635 forward MW:49279	49248	0	0	0	0	0	-5.24793	-5.24793
SL1344_2971	recD	SL1344_2971 exonuclease V alpha-subunit 3165738:3167573 reverse MW:66526	66484	0	0	0	3.7678e-06	0	0	0
SL1344_2972	recB	SL1344_2972 exonuclease V subunit 3167570:3171115 reverse MW:133814	133728	0	0	0	0	0	0	0
SL1344_2973	ptr	SL1344_2973 protease III precursor (pitrilysin) 3171108:3173996 reverse MW:107487	107419	0	0	0	0	0	-5.35755	-5.35755
SL1344_2974	recC	SL1344_2974 exonuclease V subunit 3174174:3177545 reverse MW:129047	128964	0	0	0	4.10913e-06	0	0	0
SL1344_2979	thyA	SL1344_2979 Thymidylate synthase 3179479:3180273 reverse MW:30368	30349	0	0	0	0	0	0	0
SL1344_2980	lgt	SL1344_2980 Prolipoprotein diacylglyceryl transferase 3180280:3181155 reverse MW:33075	33053	0	0	0	0	0	0	0
SL1344_2981	ptsP	SL1344_2981 phosphoenolpyruvate-protein phosphotransferase 3181371:3183617 reverse MW:83627	83574	0	0	0	0	0	-6.40939	-6.40939
SL1344_2982	nudH	SL1344_2982 RNA pyrophosphohydrolase 3183630:3184160 reverse MW:20806	20793	0	0	0	8.52529e-06	0	0	0
SL1344_2983	mutH	SL1344_2983 DNA mismatch repair protein mutH 3184843:3185538 forward MW:25409	25394	0	0	0	0	0	0	0
SL1344_2984	ygdQ	SL1344_2984 hypothetical membrane protein 3185720:3186433 forward MW:26151	26134	0	0	0	0	0	0	0
SL1344_2985	ygdR	SL1344_2985 possible lipoprotein 3186603:3186821 forward MW:7826	7822	0	0	0	0	0	0	0
SL1344_2986	tas	SL1344_2986 possible oxidoreductase 3187012:3188052 forward MW:38564	38540	0	0	0	0	0	-6.39232	-6.39232
SL1344_2988	aas	SL1344_2988 2-acylglycerophosphoethanolamine acyl transferase/acyl carrier protein synthetase 3189334:3191493 reverse MW:80510	80458	0	0	0	8.35427e-06	0	-5.35755	-5.35755
SL1344_2989	galR	SL1344_2989 galactose operon repressor 3192086:3193114 forward MW:36869	36846	0	0	0	4.10372e-06	0	0	0
SL1344_2991	lysA	SL1344_2991 diaminopimelate decarboxylase 3194157:3195419 reverse MW:45999	45969	0	0	0	0	0	0	0
SL1344_2992	lysR	SL1344_2992 transcriptional activator protein LysR 3195537:3196472 forward MW:34534	34512	0	0	0	0	0	0	0
SL1344_2993	ygeA	SL1344_2993 conserved hypothetical protein 3196444:3197151 reverse MW:25850	25834	0	0	0	0	0	0	0
SL1344_2995	kduD	SL1344_2995 2-keto-3-deoxygluconate oxidoreductase 3199036:3199797 reverse MW:27024	27007	0	0	0	0	0	0	0
SL1344_2997	yqeF	SL1344_2997 probable acetyl-CoA acetyltransferase 3201120:3202298 reverse MW:40910	40884	0	0	0	0	0	0	0
SL1344_3001	yohL	SL1344_3001 conserved hypothetical protein 3205245:3205517 reverse MW:10208	10202	0	0	0	0	0	0	0
SL1344_3011	0	SL1344_3011 hypothetical protein (assiciated with virulence) 3215876:3216274 reverse MW:14938	14929	0	0	0	0	0	0	0
SL1344_3014	0	SL1344_3014 possible lipoprotein 3218295:3219053 reverse MW:26652	26636	0	0	0	0	0	0	0
SL1344_3015	idi	SL1344_3015 Isopentenyl-diphosphate delta-isomerase 3219318:3219863 forward MW:20781	20768	0	0	0	0	0	0	0
SL1344_3016	lysS	SL1344_3016 Lysyl-tRNA synthetase 3219939:3221456 reverse MW:57576	57539	0	0	0	0	-5.4451	-7.15592	-1.71081
SL1344_3017	prfB	SL1344_3017 peptide chain release factor 2 (RF-2) 3221466:3222542 reverse MW:40111	40087	0	2.3446e-06	0.000100185	0.000327958	0	-7.05528	-7.05528
SL1344_3018	recJ	SL1344_3018 single-stranded DNA-specific exonuclease 3222669:3224402 reverse MW:63367	63327	0	0	0	1.329e-05	0	0	0
SL1344_3019	dsbC	SL1344_3019 thiol:disulfide interchange protein 3224408:3225082 reverse MW:24298	24282	0	0	0	0	0	0	0
SL1344_3020	xerD	SL1344_3020 Tyrosine recombinase xerD. 3225145:3226041 reverse MW:34220	34199	0	0	0	0	0	0	0
SL1344_3021	fldB	SL1344_3021 flavodoxin II 3226154:3226675 forward MW:19629	19616	0	0	0	0	0	0	0
SL1344_3023	ygfY	SL1344_3023 conserved hypothetical protein 3227122:3227388 reverse MW:10550	10543	0	0	0	0	0	0	0
SL1344_3024	ygfZ	SL1344_3024 conserved hypothetical protein 3227638:3228618 forward MW:35972	35949	0	0	0	0	3	-6.44501	-9.44501
SL1344_3026	yqfB	SL1344_3026 conserved hypothetical protein 3229557:3229868 reverse MW:11899	11892	0	7.7551e-07	0	6.96752e-05	0	-5.39232	-5.39232
SL1344_3027	bglA	SL1344_3027 6-phospho-beta-glucosidase 3230027:3231460 forward MW:55103	55068	0	0	0	4.24581e-06	0	-5.39232	-5.39232
SL1344_3029	gcvP	SL1344_3029 Glycine dehydrogenase [decarboxylating] 3232857:3235730 reverse MW:104288	104221	0	0	0	4.21307e-06	-8.17849	-8.00161	0.176878
SL1344_3030	gcvH	SL1344_3030 Glycine cleavage system H protein. Probable glycine cleavage system H protein. 3235893:3236282 reverse MW:13841	13833	0	7.49436e-07	0.000202816	0.000179406	0	0	0
SL1344_3031	gcvT	SL1344_3031 Aminomethyltransferase 3236308:3237402 reverse MW:40217	40191	0	0	0	0	-10.4929	-8.48784	2.00501
SL1344_3032	visC	SL1344_3032 possible monooxygenase 3237857:3239059 reverse MW:44009	43981	0	0	0.000144075	3.58736e-05	0	0	0
SL1344_3033	ubiH	SL1344_3033 2-octaprenyl-6-methoxyphenol hydroxylase 3239185:3240363 reverse MW:41755	41729	0	0	0	0	0	0	0
SL1344_3034	pepP	SL1344_3034 proline aminopeptidase II 3240360:3241502 reverse MW:42481	42455	0	0	0	0	0	-8.45943	-8.45943
SL1344_3035	ygfB	SL1344_3035 conserved hypothetical protein 3241702:3242280 reverse MW:21256	21243	0	0	0	3.51876e-05	0	0	0
SL1344_3036	ygfE	SL1344_3036 conserved hypothetical protein 3242447:3242776 forward MW:12523	12515	0	0	0	0	0	-7.92481	-7.92481
SL1344_3037	ygfA	SL1344_3037 conserved hypothetical protein 3243142:3243618 forward MW:18094	18083	0	0	0	2.42562e-05	0	0	0
SL1344_3038	serA	SL1344_3038 D-3-phosphoglycerate dehydrogenase 3243999:3245231 reverse MW:43988	43960	0	0	0	0	-8.29921	-8.44294	-0.143735
SL1344_3039	rpiA	SL1344_3039 Ribose-5-phosphate isomerase A 3245497:3246156 reverse MW:22895	22881	0	0	3.15172e-05	3.47534e-05	-5.35755	-3.45943	1.89812
SL1344_3040	iciA	SL1344_3040 chromosome intitiation inhibitor 3246310:3247203 forward MW:33509	33488	0	7.67823e-07	3.28092e-05	8.75275e-06	0	0	0
SL1344_3041	yggE	SL1344_3041 conserved hypothetical protein 3247469:3248215 reverse MW:26496	26480	0	0	0	0	0	-7.07682	-7.07682
SL1344_3043	yggB	SL1344_3043 hypothetical membrane protein 3249144:3250004 reverse MW:31060	31041	0	0	0	1.3506e-05	0	0	0
SL1344_3044	fba	SL1344_3044 fructose 1,6-bisphosphate aldolase 3250231:3251310 reverse MW:39156	39132	0	0	0	0	-6.62266	-6.40656	0.216103
SL1344_3045	pgk	SL1344_3045 phosphoglycerate kinase 3251412:3252575 reverse MW:41132	41107	0	2.43873e-06	0.00023647	0.000203582	-6.1877	-5.2854	0.902296
SL1344_3046	epd	SL1344_3046 D-erythrose 4-phosphate dehydrogenase 3252597:3253643 reverse MW:38125	38102	0	9.26194e-06	0.000677851	0.000362719	0	0	0
SL1344_3047	0	SL1344_3047 conserved hypothetical protein 3254017:3254442 forward MW:15230	15221	0	0	0	0	0	0	0
SL1344_3052	tktA	SL1344_3052 transketolase 3257113:3259059 reverse MW:70505	70460	0	0	0	0	-7.56558	-7.62685	-0.0612716
SL1344_3053	yggG	SL1344_3053 conserved hypothetical protein 3259380:3260138 forward MW:26708	26691	0	3.20889e-06	0.000606198	0.000632504	0	0	0
SL1344_3054	speB	SL1344_3054 Agmatinase 3260239:3261159 reverse MW:33603	33582	0	0	0	0	0	-7.52356	-7.52356
SL1344_3060	0	SL1344_3060 hypothetical GntR-family regulatory protein 3267800:3268549 reverse MW:29450	29432	0	0	0	1.84129e-05	0	-5.35755	-5.35755
SL1344_3061	0	SL1344_3061 hypothetical outer membrane lipoprotein 3268754:3269485 reverse MW:26287	26271	0	0	0	4.1282e-06	0	0	0
SL1344_3062	speA	SL1344_3062 Biosynthetic arginine decarboxylase 3269629:3271542 reverse MW:71752	71707	0	0	0	0	0	-7.77479	-7.77479
SL1344_3065	metK	SL1344_3065 S-adenosylmethionine synthetase 3272395:3273549 forward MW:41953	41926	0	0	0	2.19443e-05	-4.92237	-3.85505	1.06731
SL1344_3066	galP	SL1344_3066 galactose-proton symport (galactose transporter) 3274081:3275436 forward MW:49691	49658	0	3.41681e-06	0.000103059	4.91835e-05	0	0	0
SL1344_3068	endA	SL1344_3068 endonuclease I 3276107:3276814 forward MW:26806	26789	0	0	0	0	0	0	0
SL1344_3069	yggJ	SL1344_3069 conserved hypothetical protein 3276843:3277622 forward MW:28897	28879	0	0	0	0	0	-6.40939	-6.40939
SL1344_3070	gshB	SL1344_3070 Glutathione synthetase 3277642:3278589 forward MW:35433	35410	0	0	0	8.4695e-06	-8.34873	-7.03342	1.31531
SL1344_3071	yqgE	SL1344_3071 conserved hypothetical protein 3278805:3279368 forward MW:20681	20668	0	0	3.26408e-05	1.3094e-05	0	0	0
SL1344_3072	yqgF	SL1344_3072 Putative Holliday junction resolvase 3279368:3279784 forward MW:15160	15151	0	0	0	0	0	0	0
SL1344_3075	yggS	SL1344_3075 conserved hypothetical protein 3281647:3282351 forward MW:25671	25655	0	0	0	0	-8.29921	0	8.29921
SL1344_3076	yggT	SL1344_3076 integral membrane protein 3282370:3282936 forward MW:21096	21082	0	0	3.15316e-05	0	0	0	0
SL1344_3077	yggU	SL1344_3077 conserved hypothetical protein 3282933:3283223 forward MW:10531	10525	0	0	0	0	0	0	0
SL1344_3078	yggV	SL1344_3078 HAM1 protein homolog. 3283231:3283824 forward MW:21033	21020	0	0	0	0	0	0	0
SL1344_3081	ansB	SL1344_3081 L-asparaginase 3286184:3287230 reverse MW:36927	36904	0	0	0	0	0	-11.0861	-11.0861
SL1344_3082	yggN	SL1344_3082 hypothetical protein 3287419:3288138 reverse MW:26265	26249	0	0	0	0.000217402	0	0	0
SL1344_3083	yggL	SL1344_3083 conserved hypothetical protein 3288188:3288514 reverse MW:12794	12786	0	0	0	0	0	0	0
SL1344_3084	trmB	SL1344_3084 conserved hypothetical protein 3288514:3289233 reverse MW:27127	27110	0	0	0	0	0	0	0
SL1344_3086	yggX	SL1344_3086 conserved hypothetical protein 3290468:3290743 forward MW:10899	10892	0	0	0	0	0	-7.39232	-7.39232
SL1344_3087	mltC	SL1344_3087 membrane-bound lytic murein transglycosylase C 3290856:3291941 forward MW:40406	40381	0	0	0	1.68051e-05	0	-5.35755	-5.35755
SL1344_3088	nupG	SL1344_3088 nucleoside permease nupg (nucleoside-transport system protein) 3292158:3293414 forward MW:46497	46466	0	0	0	4.11922e-06	0	0	0
SL1344_3091	0	SL1344_3091 conserved hypothetical protein 3297083:3297517 reverse MW:16146	16136	0	0	0	0	3	-4.79442	-7.79442
SL1344_3092	0	SL1344_3092 hypothetical hydrolase 3297528:3298853 reverse MW:48422	48392	0	7.73542e-07	0	2.22212e-05	-4.61196	-2.64463	1.96733
SL1344_3093	0	SL1344_3093 conserved hypothetical protein 3298878:3299405 reverse MW:19541	19529	0	7.53955e-06	0.000183387	4.68959e-05	-4.23447	4.08746	8.32193
SL1344_3094	citE	SL1344_3094 possible citrate lyase 3299429:3300271 reverse MW:29970	29951	0	1.68516e-06	3.20031e-05	0	-5.39874	-3.9542	1.44455
SL1344_3100	0	SL1344_3100 possible amino acid transport protein 3306115:3307614 reverse MW:53883	53846	0	1.5794e-06	6.7488e-05	2.48241e-05	0	0	0
SL1344_3105	0	SL1344_3105 conserved hypothetical protein 3311675:3312160 reverse MW:17753	17742	0	0	0	0	0	0	0
SL1344_3106	0	SL1344_3106 conserved hypothetical protein 3312886:3313809 reverse MW:35194	35171	0	0	0	0	-8.33985	-7.52356	0.816288
SL1344_3107	0	SL1344_3107 possible hydrolase 3313848:3314726 reverse MW:33116	33095	0	0	3.24205e-05	1.83872e-05	0	-5.39232	-5.39232
SL1344_3108	exuT	SL1344_3108 hexuronate transporter 3315122:3316426 reverse MW:47815	47783	0	0	0	4.21998e-06	0	0	0
SL1344_3109	uxuA	SL1344_3109 D-mannonate hydrolase 3316831:3318015 forward MW:44937	44909	0	0	0	0	0	-7.8392	-7.8392
SL1344_3110	uxuB	SL1344_3110 D-mannonate oxidoreductase 3318126:3319598 forward MW:54008	53973	0	0	0	2.29056e-05	0	-6.37504	-6.37504
SL1344_3111	uxaC	SL1344_3111 Uronate isomerase 3319610:3321022 forward MW:53610	53576	0	0	0	8.25859e-06	0	-8.12928	-8.12928
SL1344_3112	0	SL1344_3112 hypothetical protein 3321322:3322380 reverse MW:39384	39359	0	0	0	2.80093e-05	0	-6.40939	-6.40939
SL1344_3113	gsp	SL1344_3113 glutathionylspermidine synthetase/amidase 3323050:3324906 reverse MW:70241	70196	0	0	0	8.53181e-06	0	-7.40939	-7.40939
SL1344_3114	yghU	SL1344_3114 possible transferase 3325133:3325999 forward MW:32343	32323	0	0	0	1.70065e-05	0	-5.35755	-5.35755
SL1344_3119	hybE	SL1344_3119 hydrogenase-2 component protein 3328515:3329003 reverse MW:17887	17876	0	0	0	4.12154e-06	0	0	0
SL1344_3120	hybD	SL1344_3120 hydrogenase-2 component protein 3328996:3329490 reverse MW:17619	17608	0	0	0	0	0	0	0
SL1344_3121	hybC	SL1344_3121 hydrogenase-2 large subunit 3329490:3331193 reverse MW:62438	62399	0	0	0	0	0	-7.8009	-7.8009
SL1344_3123	hybA	SL1344_3123 hydrogenase-2 small subunit 3332358:3333344 reverse MW:35948	35925	0	0	0	2.22784e-05	0	0	0
SL1344_3124	hypO	SL1344_3124 hydrogenase-2 small chain protein 3333347:3334465 reverse MW:39623	39598	0	0	0	0	0	-5.32193	-5.32193
SL1344_3126	0	SL1344_3126 methyl-accepting chemotaxis protein 3335027:3336670 reverse MW:58898	58861	0	0	0	4.03935e-06	0	0	0
SL1344_3127	yqhA	SL1344_3127 hypothetical membrane protein 3336977:3337471 reverse MW:18504	18492	0	0	0	0	0	0	0
SL1344_3128	0	SL1344_3128 exported protein 3337751:3338266 reverse MW:20057	20044	0	0	0	0	0	0	0
SL1344_3129	0	SL1344_3129 hypothetical protein 3338358:3338768 forward MW:15449	15440	0	0	0	0	0	0	0
SL1344_3130	0	SL1344_3130 hypothetical protein 3338755:3339159 forward MW:15562	15552	0	0	0	0	0	0	0
SL1344_3131	yghA	SL1344_3131 possible oxidoreductase 3339283:3340167 forward MW:31439	31419	0	0	0	0	4.64386	-1.74846	-6.39232
SL1344_3132	exbD	SL1344_3132 biopolymer transport ExbD protein 3340280:3340705 reverse MW:15619	15609	0	2.48522e-06	0	8.41317e-06	0	0	0
SL1344_3133	exbB	SL1344_3133 biopolymer transport ExbB protein 3340712:3341446 reverse MW:26179	26163	0	0	0	0	0	-5.32193	-5.32193
SL1344_3135	metC	SL1344_3135 beta-cystathionase 3341698:3342885 forward MW:42872	42845	0	0	0	4.00329e-06	0	-6.35755	-6.35755
SL1344_3136	yghB	SL1344_3136 DedA-family integral membrane protein 3343025:3343684 forward MW:24153	24137	0	0	0	8.19482e-06	0	0	0
SL1344_3137	yqhC	SL1344_3137 probable AraC-family trancriptional regulatory protein 3343748:3344665 reverse MW:34720	34697	0	0	0	0	0	0	0
SL1344_3138	yqhD	SL1344_3138 probable alcohol dehydrogenase 3344840:3346003 forward MW:42084	42058	0	0	0	0	0	-7.01123	-7.01123
SL1344_3139	dkgA	SL1344_3139 2,5-diketo-D-gluconic acid reductase A 3346109:3346936 forward MW:30995	30976	0	0	0	1.28709e-05	0	0	0
SL1344_3141	0	SL1344_3141 conserved hypothetical protein 3348632:3349087 forward MW:17172	17162	0	0	0	0	0	0	0
SL1344_3142	ygiR	SL1344_3142 conserved hypothetical protein 3349642:3351813 reverse MW:81912	81858	0	0	0	0	0	0	0
SL1344_3146	sufI	SL1344_3146 SufI protein 3355171:3356583 reverse MW:51858	51825	0	0	0	0	0	0	0
SL1344_3147	plsC	SL1344_3147 1-acyl-glycerol-3-phosphate acyltransferase 3356657:3357394 reverse MW:27339	27321	0	0	0	0	0	0	0
SL1344_3148	parC	SL1344_3148 topoisomerase IV subunit A 3357651:3359909 reverse MW:84038	83985	0	0	0	0	-9.42626	-8.00562	1.42064
SL1344_3150	ygiW	SL1344_3150 possible exported protein 3360958:3361350 reverse MW:13944	13936	0	0	6.88152e-05	2.57016e-05	0	-5.35755	-5.35755
SL1344_3151	ygiX	SL1344_3151 probable two-component system response regulator. 3361502:3362161 forward MW:24274	24259	0	0	0	4.08709e-06	0	0	0
SL1344_3152	ygiY	SL1344_3152 probable two-component system sensor histidine kinase 3362158:3363507 forward MW:50538	50507	0	0	0	0	0	0	0
SL1344_3153	mdaB	SL1344_3153 hypothetical oxidoreductase 3363614:3364195 forward MW:21785	21771	0	0	0	0	0	0	0
SL1344_3154	ygiN	SL1344_3154 conserved hypothetical protein 3364227:3364541 forward MW:11583	11576	0	0	0	0	0	-6.58496	-6.58496
SL1344_3155	parE	SL1344_3155 topoisomerase IV subunit B 3364666:3366558 reverse MW:70089	70045	0	0	0	9.59445e-06	0	-5.16993	-5.16993
SL1344_3156	yqiA	SL1344_3156 conserved hypothetical protein 3366586:3367167 reverse MW:21608	21595	0	0	0	3.57261e-06	0	0	0
SL1344_3157	cpdA	SL1344_3157 cyclic 3~,5~-adenosine monophosphate phosphodiesterase 3367167:3367994 reverse MW:31021	31002	0	0	0	0	0	0	0
SL1344_3158	yqiB	SL1344_3158 conserved hypothetical protein 3368019:3368441 reverse MW:16542	16531	0	0	0	0	0	0	0
SL1344_3159	nudF	SL1344_3159 conserved hypothetical protein 3368438:3369070 reverse MW:23809	23794	0	0	0	0	0	0	0
SL1344_3160	tolC	SL1344_3160 outer membrane protein TolC precursor 3369271:3370746 forward MW:53686	53653	0	0	0	0	-5.41772	-5.3087	0.109018
SL1344_3161	ygiB	SL1344_3161 possible lipoprotein 3370959:3371630 forward MW:23387	23372	0	6.30156e-06	0.000269267	0.000249709	-8.38802	-6.42626	1.96175
SL1344_3162	ygiC	SL1344_3162 conserved hypothetical protein 3371636:3372799 forward MW:44981	44952	0	0	3.35132e-05	8.64255e-06	0	-7.47573	-7.47573
SL1344_3165	assT	SL1344_3165 probable arylsulfate sulfotransferase 3375206:3377002 forward MW:66587	66546	0	0	0	1.77688e-05	0	0	0
SL1344_3166	dsbA	SL1344_3166 disulfide isomerase 3377022:3377693 forward MW:24574	24559	0	0	0	0	0	0	0
SL1344_3168	ribB	SL1344_3168 3,4-dihydroxy-2-butanone 4-phosphate synthase 3378556:3379209 reverse MW:23310	23296	0	0	0	0	0	0	0
SL1344_3169	yqiC	SL1344_3169 conserved hypothetical protein 3379646:3379945 forward MW:11553	11546	0	0	0	0	0	0	0
SL1344_3170	glgS	SL1344_3170 glycogen synthesis protein GlgS 3380019:3380228 reverse MW:8201	8196	0	0	0	0	0	0	0
SL1344_3173	rfaE	SL1344_3173 ADP-heptose synthase 3383264:3384697 reverse MW:51125	51092	0	0	0	0	-8.29462	-8.85487	-0.560248
SL1344_3174	glnE	SL1344_3174 adenyl-transferase 3384745:3387588 reverse MW:108038	107969	0	0	3.13976e-05	4.62551e-05	0	-6.37504	-6.37504
SL1344_3175	ygiF	SL1344_3175 conserved hypothetical protein 3387706:3389007 reverse MW:48555	48524	0	0	0	8.26035e-06	0	-5.20945	-5.20945
SL1344_3176	ygiM	SL1344_3176 hypothetical signal transduction protein 3389249:3389863 forward MW:22855	22841	0	0	0	3.71241e-06	0	0	0
SL1344_3177	cca	SL1344_3177 tRNA nucleotidyltransferase 3389926:3391167 forward MW:46532	46503	0	0	0	0	0	0	0
SL1344_3178	bacA	SL1344_3178 bacitracin resistance protein (hypothetical undecaprenol kinase) 3391272:3392096 reverse MW:29923	29903	0	0	0	0	0	0	0
SL1344_3179	folB	SL1344_3179 dihydroneopterin aldolase 3392191:3392553 reverse MW:13424	13416	0	0	0	0	-5.36632	-4.29462	1.0717
SL1344_3180	ygiH	SL1344_3180 hypothetical membrane protein 3392657:3393268 forward MW:21904	21890	0	7.71778e-07	3.29782e-05	1.57383e-05	0	0	0
SL1344_3182	gcp	SL1344_3182 possible glycoprotease 3393519:3394532 reverse MW:35940	35917	0	0	0	0	0	-5.35755	-5.35755
SL1344_3183	rpsU	SL1344_3183 30S ribosomal subunit protein S21 3394760:3394975 forward MW:8500	8495	0	0	0	4.12183e-06	-3.69322	-4.42898	-0.735759
SL1344_3184	dnaG	SL1344_3184 DNA primase 3395211:3396956 forward MW:65363	65321	0	1.85091e-05	0.00023927	0.000398512	0	0	0
SL1344_3185	rpoD	SL1344_3185 RNA polymerase sigma-70 factor 3397106:3398953 forward MW:70531	70486	0	0	0	0	-9.3443	-10.6917	-1.34745
SL1344_3186	mug	SL1344_3186 G/U mismatch-specific DNA glycosylase 3399077:3399583 reverse MW:18650	18638	0	0	6.49737e-05	0.000165375	0	0	0
SL1344_3188	yqjI	SL1344_3188 conserved hypothetical protein 3400863:3401510 forward MW:24176	24161	0	0	0	0	0	0	0
SL1344_3189	cheM	SL1344_3189 methyl-accepting chemotaxis protein II 3401507:3403072 reverse MW:57279	57243	0	0	0	0	0	-7.82018	-7.82018
SL1344_3190	aer	SL1344_3190 aerotaxis receptor protein 3403460:3404980 reverse MW:55064	55029	0	0	0	2.26273e-05	0	0	0
SL1344_3192	fadH	SL1344_3192 2,4-dienoyl-CoA reductase [NADPH] (ec 1.3.1.34) (2,4-dienoyl coenzyme A reductase) 3406960:3408978 forward MW:73130	73084	0	0	0	0	0	0	0
SL1344_3193	ygjO	SL1344_3193 conserved hypothetical protein 3409059:3410195 reverse MW:42272	42246	0	0	0	0	0	0	0
SL1344_3194	ygjP	SL1344_3194 conserved hypothetical protein 3410419:3410778 forward MW:13889	13880	0	0	0	0	0	0	0
SL1344_3196	ygjR	SL1344_3196 possible oxidoreductase 3411711:3412709 forward MW:36889	36865	0	0	0	0	0	0	0
SL1344_3199	yqjA	SL1344_3199 hypothetical membrane protein 3415899:3416561 forward MW:24657	24640	0	0	0	0	0	0	0
SL1344_3202	yqjE	SL1344_3202 hypothetical membrane protein 3417811:3418209 forward MW:14781	14772	0	0	0	0	0	0	0
SL1344_3203	yqjK	SL1344_3203 conserved hypothetical protein 3418206:3418505 forward MW:11548	11541	0	0	0	0	0	0	0
SL1344_3205	yqjG	SL1344_3205 conserved hypothetical protein 3419203:3420189 forward MW:37381	37358	0	0	0	0	0	0	0
SL1344_3206	yhaH	SL1344_3206 hypothetical membrane protein 3420313:3420678 forward MW:14150	14142	0	0	0	0	0	0	0
SL1344_3207	yhaJ	SL1344_3207 possible LysR-family transcriptional regulator 3420717:3421613 reverse MW:33217	33196	0	0	0	0	0	-6.40939	-6.40939
SL1344_3212	tdcG	SL1344_3212 L-serine dehydratase 3425703:3427067 reverse MW:48475	48444	0	0	0	8.46572e-06	0	0	0
SL1344_3213	tdcE	SL1344_3213 probable formate acetyltransferase 3427137:3429431 reverse MW:85865	85810	0	0	0	0	0	-8.87652	-8.87652
SL1344_3214	tdcD	SL1344_3214 propionate kinase 3429465:3430673 reverse MW:43718	43690	0	0	0	4.70494e-05	0	0	0
SL1344_3215	tdcC	SL1344_3215 threonine/serine transporter 3430739:3432070 reverse MW:48974	48942	0	0	0	0	0	0	0
SL1344_3216	tdcB	SL1344_3216 catabolic threonine dehydratase 3432091:3433080 reverse MW:35141	35119	0	0	0	0	0	0	0
SL1344_3217	tdcA	SL1344_3217 TDC operon transcriptional activator 3433178:3434116 reverse MW:34870	34848	0	0	0	0	0	0	0
SL1344_3221	garR	SL1344_3221 2-hydroxy-3-oxopropionate reductase 3437158:3438048 reverse MW:30729	30709	0	0	0	0	0	0	0
SL1344_3222	garL	SL1344_3222 5-keto-4-deoxy-D-glucarate aldolase 3438074:3438790 reverse MW:25394	25378	0	0	0	0	0	0	0
SL1344_3223	garD	SL1344_3223 D-galactarate dehydratase 3439374:3440945 forward MW:56354	56318	0	0	0	0	0	0	0
SL1344_3224	0	SL1344_3224 probable carbohydrate kinase 3441185:3442132 reverse MW:34495	34473	0	0	0	0	0	0	0
SL1344_3225	agaR	SL1344_3225 hypothetical transcriptional repressor 3442143:3442976 reverse MW:30156	30138	0	0	0	0	0	0	0
SL1344_3226	gatY	SL1344_3226 tagatose-bisphosphate aldolase 3443310:3444164 forward MW:30922	30903	0	0	0	0	0	0	0
SL1344_3235	gatR	SL1344_3235 galactitol utilization operon repressor 3452174:3452947 forward MW:27538	27521	0	0	0	0	0	0	0
SL1344_3236	yraL	SL1344_3236 conserved hypothetical protein 3453105:3453968 reverse MW:31483	31464	0	0	0	0	0	0	0
SL1344_3237	yraM	SL1344_3237 possible exported protein 3454032:3456074 forward MW:72622	72576	0	0	0	0	0	-9.09276	-9.09276
SL1344_3239	yraO	SL1344_3239 probable phosphoheptose isomerase 3456449:3457039 forward MW:21109	21096	0	0	0	5.46001e-05	0	0	0
SL1344_3240	yraP	SL1344_3240 hypothetical protein 3457049:3457624 forward MW:20097	20085	0	0	0	0	-5.06315	-0.70044	4.36271
SL1344_3242	yhbO	SL1344_3242 conserved hypothetical protein 3458457:3458975 forward MW:18871	18860	0	8.76196e-06	0.000294171	1.43419e-05	0	0	0
SL1344_3243	yhbP	SL1344_3243 conserved hypothetical protein 3458955:3459398 reverse MW:16688	16678	0	0	0	0	0	0	0
SL1344_3245	yhbS	SL1344_3245 hypothetical acetyltransferase 3459740:3460243 reverse MW:18541	18530	0	0	0	0	0	0	0
SL1344_3246	yhbT	SL1344_3246 conserved hypothetical protein 3460237:3460761 reverse MW:19620	19607	0	0	0	0	0	0	0
SL1344_3247	yhbU	SL1344_3247 hypothetical protease 3460978:3461973 forward MW:37141	37118	0	0	0	0	0	0	0
SL1344_3248	yhbV	SL1344_3248 conserved hypothetical protein 3461982:3462860 forward MW:32544	32523	0	0	0	0	0	0	0
SL1344_3252	mtr	SL1344_3252 probable amino acid permease 3465492:3466652 reverse MW:42025	41997	0	0	0	0	0	0	0
SL1344_3253	deaD	SL1344_3253 ATP-dependent RNA helicase (dead-box protein) 3466890:3468779 reverse MW:70475	70431	0	0	0	0	0	-7.41785	-7.41785
SL1344_3254	nlpI	SL1344_3254 conserved hypothetical protein 3468958:3469842 reverse MW:33511	33491	0	0	0	1.70634e-05	0	0	0
SL1344_3255	pnp	SL1344_3255 polynucleotide phosphorylase 3469952:3472087 reverse MW:77039	76991	0	0	0	0	-11.056	-12.5969	-1.54093
SL1344_3256	rpsO	SL1344_3256 30S ribosomal subunit protein S15 3472329:3472598 reverse MW:10197	10191	0	0	0.00021291	0.000619466	3	-3.59991	-6.59991
SL1344_3257	truB	SL1344_3257 tRNA pseudouridine 55 synthase (psi55 synthase) (p35 protein) 3472749:3473693 reverse MW:35042	35020	0	7.81673e-07	0	9.74599e-06	0	0	0
SL1344_3258	rbfA	SL1344_3258 ribosome-binding factor A (P15B protein) 3473693:3474094 reverse MW:15165	15156	0	0	0	0	0	-8.72451	-8.72451
SL1344_3259	infB	SL1344_3259 protein chain initiation factor 2 3474315:3476993 reverse MW:97403	97342	0	0	0	4.2323e-05	-7.92326	-8.03199	-0.108723
SL1344_3260	nusA	SL1344_3260 transcription termination/antitermination L factor 3477018:3478520 reverse MW:55426	55391	0	2.33324e-06	0.000558317	0.000601991	-7.82575	-8.34374	-0.517987
SL1344_3261	yhbC	SL1344_3261 conserved hypothetical protein 3478548:3478970 reverse MW:15508	15499	0	7.96615e-07	0.000181544	0.000259917	0	0	0
SL1344_3262	argG	SL1344_3262 argininosuccinate synthetase 3479628:3480971 forward MW:49755	49723	0	0	0	0	0	-9.07414	-9.07414
SL1344_3264	secG	SL1344_3264 protein-export membrane protein 3482557:3482889 reverse MW:11393	11386	0	0	0	5.3892e-05	0	-7.35755	-7.35755
SL1344_3265	glmM	SL1344_3265 PGM/PMM-family protein 3483112:3484449 reverse MW:47442	47412	0	0	0	1.64058e-05	0	-7.45121	-7.45121
SL1344_3266	folP	SL1344_3266 dihydropteroate synthase 3484442:3485290 reverse MW:30484	30465	0	0	0	1.75321e-05	0	0	0
SL1344_3268	ftsH	SL1344_3268 cell division protein 3486106:3488040 reverse MW:70830	70784	0	0	0	0	-7.11048	-6.13955	0.970932
SL1344_3269	ftsJ	SL1344_3269 cell division protein 3488144:3488770 reverse MW:23238	23223	0	3.22364e-06	0.000442239	0.000225644	0	0	0
SL1344_3270	yhbY	SL1344_3270 conserved hypothetical protein 3488897:3489190 forward MW:10800	10794	0	0	0	0	0	-5.42626	-5.42626
SL1344_3271	greA	SL1344_3271 transcription elongation factor 3489346:3489822 reverse MW:17656	17645	0	0	0	4.2667e-06	0	0	0
SL1344_3272	dacB	SL1344_3272 Penicillin-binding protein (D-alanyl-D-alanine carboxypeptidase) 3490070:3491503 forward MW:51929	51896	0	0	0	0	0	0	0
SL1344_3273	obgE	SL1344_3273 probable GTP-binding protein 3491635:3492807 reverse MW:43104	43077	0	0	0	0	0	-6.35755	-6.35755
SL1344_3275	rpmA	SL1344_3275 50S ribosomal subunit protein L27 3493918:3494175 reverse MW:9124	9119	0	0	0	8.23919e-06	0	-8.76818	-8.76818
SL1344_3276	rplU	SL1344_3276 50S ribosomal subunit protein L21 3494195:3494506 reverse MW:11578	11571	0	0	0	4.3604e-05	0	-9.45533	-9.45533
SL1344_3277	ispB	SL1344_3277 octaprenyl-diphosphate synthase 3494764:3495735 forward MW:35266	35244	0	0	0	7.02305e-05	0	-6.40939	-6.40939
SL1344_3279	murA	SL1344_3279 UDP-N-acetylglucosamine 1-carboxyvinyltransferase 3496312:3497571 reverse MW:44741	44712	0	0	0	8.5386e-06	0	-7.83289	-7.83289
SL1344_3280	yrbA	SL1344_3280 conserved hypothetical protein 3497625:3497918 reverse MW:11027	11020	0	0	0	2.28051e-05	0	0	0
SL1344_3281	yrbB	SL1344_3281 possible anti-sigma factor antagonist 3498067:3498363 reverse MW:10685	10679	0	0	0	0	0	0	0
SL1344_3282	yrbC	SL1344_3282 possible exported protein 3498363:3498998 reverse MW:24004	23989	0	0	0	0	-5.51006	2.80735	8.31741
SL1344_3283	yrbD	SL1344_3283 possible exported protein 3499017:3499568 reverse MW:19826	19814	0	7.47504e-07	3.1941e-05	0	0	0	0
SL1344_3284	yrbE	SL1344_3284 hypothetical membrane protein 3499573:3500355 reverse MW:27786	27768	0	0	0	0	0	0	0
SL1344_3285	yrbF	SL1344_3285 possible ABC-transport protein, ATP-binding component 3500363:3501175 reverse MW:29231	29212	0	0	0	0	0	0	0
SL1344_3287	yrbH	SL1344_3287 conserved hypothetical protein 3502379:3503365 forward MW:35000	34977	0	0	0	0	0	-7.06609	-7.06609
SL1344_3288	yrbI	SL1344_3288 conserved hypothetical protein 3503386:3503952 forward MW:20097	20085	0	0	0	1.33799e-05	0	0	0
SL1344_3289	yrbK	SL1344_3289 possible exported protein 3503949:3504524 forward MW:21566	21553	0	0	0	0	0	0	0
SL1344_3290	yhbN	SL1344_3290 conserved hypothetical protein 3504493:3505047 forward MW:20059	20046	0	0	0	0	0	0	0
SL1344_3291	yhbG	SL1344_3291 probable ABC transport protein, ATP-binding component 3505054:3505779 forward MW:26797	26780	0	0	0	0	0	0	0
SL1344_3292	rpoN	SL1344_3292 RNA polymerase sigma-54 factor (sigma-N) 3505827:3507260 forward MW:53988	53954	0	0	0	0	0	-5.35755	-5.35755
SL1344_3293	yhbH	SL1344_3293 probable sigma(54) modulation protein 3507283:3507570 forward MW:10857	10851	0	0	0	4.12784e-06	0	0	0
SL1344_3294	ptsN	SL1344_3294 nitrogen regulatory IIA protein 3507688:3508179 forward MW:17914	17903	0	0	0	0	0	-5.35755	-5.35755
SL1344_3295	yhbJ	SL1344_3295 conserved hypothetical protein 3508225:3509079 forward MW:32464	32444	0	0	0	4.1091e-06	0	-7.04439	-7.04439
SL1344_3296	ptsO	SL1344_3296 phosphocarrier protein (nitrogen related hpr) 3509076:3509348 forward MW:9780	9774	0	0	0	1.32383e-05	0	0	0
SL1344_3299	yhbL	SL1344_3299 conserved hypothetical protein 3511029:3511682 reverse MW:22903	22889	0	0	0	0	0	0	0
SL1344_3300	arcB	SL1344_3300 aerobic respiration control sensor protein 3511909:3514245 reverse MW:87969	87913	0	0	0	0	0	-6.2854	-6.2854
SL1344_3302	gltB	SL1344_3302 glutamate synthase [NADPH] large chain precursor 3515940:3520400 forward MW:163298	163193	0	0	0	7.84692e-06	0	-8.37938	-8.37938
SL1344_3303	gltD	SL1344_3303 glutamate synthase (NADPH) small chain 3520410:3521828 forward MW:52200	52167	0	0	0	3.32943e-05	0	-6.97728	-6.97728
SL1344_3306	codA	SL1344_3306 cytosine deaminase 3524495:3525775 forward MW:47626	47596	0	0	0	1.26386e-05	0	-6.98868	-6.98868
SL1344_3307	yhcH	SL1344_3307 conserved hypothetical protein 3525858:3526325 reverse MW:17056	17044	0	0	0	1.27449e-05	-5.37504	-2.35755	3.01749
SL1344_3308	nanK	SL1344_3308 possible kinase 3526322:3527197 reverse MW:30078	30059	0	7.76217e-07	3.31679e-05	4.12927e-06	-5.40514	-2.39232	3.01282
SL1344_3309	nanE	SL1344_3309 hypothetical N-acetylmannosamine-6-phosphate 2-epimerase 2 (ec 5.1.3.9) (mannac-6-p epimerase 2) 3527194:3527883 reverse MW:24029	24014	0	7.92548e-07	3.38657e-05	4.21614e-06	-5.51457	2.80735	8.32193
SL1344_3310	nanT	SL1344_3310 hypothetical sialic acid transporter 3527930:3529420 reverse MW:53629	53594	0	7.48283e-07	3.19742e-05	0	0	0	0
SL1344_3311	nanA	SL1344_3311 N-acetylneuraminate lyase 3529536:3530429 reverse MW:32483	32463	0	0	0	0	-5.41455	-4.95217	0.462376
SL1344_3312	yhcK	SL1344_3312 hypothetical GntR-family transcriptional regulator 3530564:3531355 reverse MW:29803	29784	0	4.59091e-06	0.00019617	0.000142395	0	0	0
SL1344_3313	sspB	SL1344_3313 stringent starvation protein B 3531464:3531964 reverse MW:18221	18210	0	0	0	0	-8.39232	0	8.39232
SL1344_3314	sspA	SL1344_3314 stringent starvation protein A 3531970:3532608 reverse MW:24249	24233	0	0	3.35718e-05	0	3	3	0
SL1344_3316	rpsI	SL1344_3316 30S ribosomal subunit protein S9 3533823:3534215 reverse MW:14826	14817	0	7.55107e-07	0	0	-5.4517	-5.43806	0.013638
SL1344_3317	rplM	SL1344_3317 50S ribosomal subunit protein L13 3534231:3534659 reverse MW:16018	16009	0	1.74026e-06	7.43616e-05	7.3684e-05	-5.88148	-2.87447	3.00701
SL1344_3318	yhcM	SL1344_3318 hypothetical ATP/GTP-binding protein 3534962:3536086 reverse MW:42659	42632	0	4.18262e-06	0.00024759	3.0824e-05	0	0	0
SL1344_3319	yhcB	SL1344_3319 conserved hypothetical protein 3536273:3536677 forward MW:15273	15264	0	0	0	0	-4.85916	-4.74851	0.110653
SL1344_3320	degQ	SL1344_3320 serine protease 3536834:3538201 forward MW:47326	47297	0	4.2075e-06	0.000121943	0.000112887	0	-8.87652	-8.87652
SL1344_3321	degS	SL1344_3321 serine protease 3538294:3539364 forward MW:37795	37772	0	0	0	4.7041e-05	0	0	0
SL1344_3329	0	SL1344_3329 LysR-family transcriptional regulator 3546695:3547360 reverse MW:24644	24629	0	0	0	0	0	0	0
SL1344_3330	0	SL1344_3330 possible GntR-family transcriptional regulator 3547347:3547976 reverse MW:24078	24062	0	0	0	0	0	0	0
SL1344_3331	mdh	SL1344_3331 malate dehydrogenase 3548096:3549034 reverse MW:32475	32455	0	0	0	0	-6.59998	-5.50031	1.09968
SL1344_3332	argR	SL1344_3332 arginine repressor 3549448:3549918 forward MW:17065	17055	0	2.08485e-05	0.00201773	0.00094148	0	0	0
SL1344_3335	yhcO	SL1344_3335 conserved hypothetical protein 3550976:3551248 reverse MW:10715	10708	0	0	0	0	0	0	0
SL1344_3339	yhcS	SL1344_3339 probable LysR-family transcriptional regulator 3554718:3555647 forward MW:34342	34320	0	0	0	0	0	0	0
SL1344_3340	tldD	SL1344_3340 TldD protein 3555770:3557215 reverse MW:51287	51255	0	0	0	0	0	-7.45943	-7.45943
SL1344_3341	yhdP	SL1344_3341 possible exported protein 3557360:3561073 reverse MW:135808	135723	0	0	0	1.76461e-05	0	0	0
SL1344_3342	cafA	SL1344_3342 ribonuclease G 3561267:3562736 reverse MW:55437	55401	0	0	0	0	0	0	0
SL1344_3343	maf	SL1344_3343 conserved hypothetical protein 3562726:3563319 reverse MW:21416	21403	0	0	0	0	0	0	0
SL1344_3345	mreC	SL1344_3345 rod shape-determining protein 3563819:3564871 reverse MW:37678	37655	0	0	0	0	0	0	0
SL1344_3346	mreB	SL1344_3346 rod shape-determining protein 3564936:3565979 reverse MW:36952	36929	0	0	0	0	-7.5265	-6.61839	0.908114
SL1344_3348	yhdA	SL1344_3348 hypothetical lipoprotein 3566287:3568227 reverse MW:73009	72962	0	7.96651e-07	0.000147511	7.86379e-05	0	0	0
SL1344_3349	yhdH	SL1344_3349 possible oxidoreductase 3568431:3569405 forward MW:34387	34366	0	0	0	0	0	0	0
SL1344_3350	0	SL1344_3350 conserved hypothetical protein 3569518:3570522 forward MW:37492	37468	0	0	0	0	0	0	0
SL1344_3352	accB	SL1344_3352 biotin carboxyl carrier protein 3571515:3571985 forward MW:16687	16676	0	0	0	0	0	-5.32193	-5.32193
SL1344_3353	accC	SL1344_3353 biotin carboxylase 3572086:3573345 forward MW:46004	45974	0	0	0	4.04011e-06	-5.36632	-6.80896	-1.44264
SL1344_3354	yhdT	SL1344_3354 conserved hypothetical protein 3573454:3573696 forward MW:9145	9140	0	7.7138e-07	3.29612e-05	8.96916e-05	0	0	0
SL1344_3356	prmA	SL1344_3356 ribosomal protein L11 methyltransferase 3575149:3576030 forward MW:31970	31950	0	0	0	0	0	-5.35755	-5.35755
SL1344_3358	fis	SL1344_3358 Fis DNA-binding protein 3577682:3577978 forward MW:11240	11233	0	0	0	4.07398e-06	0	-5.39232	-5.39232
SL1344_3364	acrF	SL1344_3364 acriflavin resistance protein F 3583693:3586806 forward MW:112528	112456	0	0	0	4.15376e-06	0	0	0
SL1344_3366	yrdA	SL1344_3366 hypothetical transferase 3593964:3594518 forward MW:19997	19984	0	0	0	0	0	0	0
SL1344_3368	aroE	SL1344_3368 shikimate dehydrogenase 3594748:3595566 reverse MW:29290	29271	0	0	0	0	0	-6.42626	-6.42626
SL1344_3369	yrdC	SL1344_3369 conserved hypothetical protein 3595571:3596143 reverse MW:20364	20352	0	0	0	8.58447e-06	0	0	0
SL1344_3370	yrdD	SL1344_3370 conserved hypothetical protein 3596148:3596690 reverse MW:19990	19977	0	0	0	0	0	0	0
SL1344_3373	def	SL1344_3373 polypeptide deformylase 3598418:3598927 forward MW:19282	19270	0	0	0	0	0	0	0
SL1344_3374	fmt	SL1344_3374 methionyl-tRNA formyltransferase 3598943:3599890 forward MW:34029	34008	0	0	0	0	0	-7.53916	-7.53916
SL1344_3375	fmu	SL1344_3375 16S rRNA methyltransferase 3599942:3601231 forward MW:48111	48081	0	0	0	1.86465e-05	0	0	0
SL1344_3376	sapG	SL1344_3376 potassium transport protein 3601253:3602629 forward MW:50369	50337	0	0	0	0	0	-6.37504	-6.37504
SL1344_3377	mscL	SL1344_3377 large-conductance mechanosensitive channel 3602771:3603184 forward MW:15074	15064	0	0	0	8.34408e-06	0	0	0
SL1344_3379	zntR	SL1344_3379 hypothetical Zn(II)-responsive regulator 3603447:3603872 reverse MW:16262	16252	0	0	0	0	0	0	0
SL1344_3381	rplQ	SL1344_3381 50S ribosomal subunit protein L17 3604359:3604742 reverse MW:14394	14386	0	0	0	0	-4.66754	-5.71756	-1.05002
SL1344_3382	pez	SL1344_3382 DNA-directed RNA polymerase alpha chain 3604783:3605772 reverse MW:36512	36489	0	2.89653e-06	7.3672e-05	0.00015262	-6.12659	-5.55058	0.576013
SL1344_3383	rpsD	SL1344_3383 30S ribosomal subunit protein S4 3605798:3606418 reverse MW:23485	23471	0	6.90951e-06	0.000482108	0.000323366	-4.11974	-3.57568	0.544055
SL1344_3384	rpsK	SL1344_3384 30S ribosomal subunit protein S11 3606452:3606784 reverse MW:11727	11720	0	6.46975e-06	0.000112985	7.75139e-05	4.9542	-4.46787	-9.42206
SL1344_3385	rpsM	SL1344_3385 30S ribosomal subunit protein S13 3606858:3607214 reverse MW:13161	13153	0	3.06205e-06	0	6.85943e-05	3	-10.7875	-13.7875
SL1344_3386	rpmJ	SL1344_3386 50S ribosomal subunit protein L36 3607361:3607477 reverse MW:4364	4361	0	7.88176e-07	0	0.00141401	0	0	0
SL1344_3387	prlA	SL1344_3387 preprotein translocase subunit 3607509:3608840 reverse MW:48530	48498	0	0	0	0	0	-5.20945	-5.20945
SL1344_3388	rplO	SL1344_3388 50S ribosomal subunit protein L15 3608848:3609282 reverse MW:14966	14957	0	0	0	3.71042e-06	-5.97412	-4.98594	0.988178
SL1344_3389	rpmD	SL1344_3389 50S ribosomal subunit protein L30 3609286:3609465 reverse MW:6513	6510	0	2.86809e-06	0.000182299	9.19263e-05	5.2854	-8.34373	-13.6291
SL1344_3390	rpsE	SL1344_3390 30S ribosomal subunit protein S5 3609469:3609972 reverse MW:17603	17592	0	3.93224e-06	0	0.00126698	-4.88691	-0.757082	4.12983
SL1344_3391	rl18	SL1344_3391 L18 Ribosomal Protein 3609987:3610340 reverse MW:12769	12762	0	5.83592e-05	0.00172793	9.86997e-05	-4.23947	-9.40041	-5.16094
SL1344_3392	rplF	SL1344_3392 50S ribosomal subunit protein L6 3610350:3610883 reverse MW:18859	18848	0	1.77421e-06	3.39848e-05	0.0012164	-4.62497	-2.66359	1.96138
SL1344_3393	rpsH	SL1344_3393 30S ribosomal subunit protein S8 3610896:3611288 reverse MW:14126	14118	0	3.62776e-05	0.000895727	0.000229999	-3.57132	-6.88972	-3.3184
SL1344_3394	rpsN	SL1344_3394 30S ribosomal subunit protein S14 3611322:3611612 reverse MW:11063	11056	0	6.15889e-06	7.37455e-05	0.000735202	3	-6.94105	-9.94105
SL1344_3395	rplE	SL1344_3395 50S ribosomal subunit protein L5 3611642:3612181 reverse MW:20317	20305	0	7.95019e-07	0	9.82605e-05	-4.46239	-1.79959	2.6628
SL1344_3396	rplX	SL1344_3396 50S ribosomal subunit protein L24 3612196:3612510 reverse MW:11316	11309	0	1.33356e-05	0.000293234	4.63451e-05	-8.39232	-14.1447	-5.75242
SL1344_3397	rplN	SL1344_3397 50S ribosomal subunit protein L14 3612521:3612892 reverse MW:13568	13559	0	0	3.35904e-05	0.00181133	3	-7.00703	-10.007
SL1344_3398	rpsQ	SL1344_3398 30S ribosomal subunit protein S17 3613056:3613310 reverse MW:9722	9716	0	7.80005e-07	0	0.000102871	0	-6.61471	-6.61471
SL1344_3399	rpmC	SL1344_3399 50S ribosomal subunit protein L29 3613310:3613501 reverse MW:7260	7256	0	0	0	9.78729e-06	0	-8.40514	-8.40514
SL1344_3400	rplP	SL1344_3400 50S ribosomal subunit protein L16 3613501:3613911 reverse MW:15194	15184	0	0	0	3.38631e-05	4.08746	-1.27009	-5.35755
SL1344_3401	rpsC	SL1344_3401 30S ribosomal subunit protein S3 3613924:3614625 reverse MW:25983	25967	0	1.71058e-06	0	4.06587e-06	-6.63411	-4.77115	1.86295
SL1344_3402	rplV	SL1344_3402 50s ribosomal protein l22 3614643:3614975 reverse MW:12226	12219	0	4.85484e-06	0.000486704	0.000133768	4.90689	-8.17476	-13.0816
SL1344_3403	rpsS	SL1344_3403 30S ribosomal subunit protein S19 3614990:3615268 reverse MW:10416	10410	0	3.04598e-06	0	0.000866904	3	-14.7589	-17.7589
SL1344_3404	rplB	SL1344_3404 50S ribosomal subunit protein L2 3615285:3616106 reverse MW:29820	29802	0	7.98471e-07	0	0.0221796	-4.76711	-5.89383	-1.12672
SL1344_3405	rplW	SL1344_3405 50S ribosomal subunit protein L23 3616124:3616426 reverse MW:11213	11206	0	7.35768e-06	0.000201457	0.00044005	-4.20945	-9.65235	-5.44289
SL1344_3406	rplD	SL1344_3406 50S ribosomal subunit protein L4 3616423:3617028 reverse MW:22086	22073	0	1.79963e-06	3.32844e-05	0.00144847	2.80735	-5.2854	-8.09276
SL1344_3407	rplC	SL1344_3407 50S ribosomal subunit protein L3 3617039:3617668 reverse MW:22247	22234	0	7.40709e-07	0	2.73012e-05	-4.2156	-3.2115	1.00409
SL1344_3408	rpsJ	SL1344_3408 30S ribosomal subunit protein S10 3617701:3618012 reverse MW:11766	11759	0	3.78385e-06	7.05946e-05	3.5155e-05	-4.01337	-7.31924	-3.30587
SL1344_3410	bfr	SL1344_3410 bacterioferritin 3618856:3619332 reverse MW:18355	18343	0	4.70701e-06	7.58758e-05	0.000750601	-5.40088	-2.39232	3.00856
SL1344_3412	tuf	SL1344_3412 elongation factor Tu 3619784:3620968 reverse MW:43284	43256	0	7.91409e-07	3.3817e-05	4.21009e-06	-5.30797	-6.76342	-1.45545
SL1344_3413	fusA	SL1344_3413 elongation factor G 3621040:3623154 reverse MW:77600	77550	0.000376655	0.000138934	0.0055025	0.0150902	-10.9934	-12.2333	-1.23993
SL1344_3414	rpsG	SL1344_3414 30S ribosomal subunit protein S7 3623251:3623721 reverse MW:17590	17579	0	1.48707e-06	0.00305798	0.00722255	-6.07625	-3.07039	3.00586
SL1344_3415	rpsL	SL1344_3415 30S ribosomal subunit protein S12 3623817:3624191 reverse MW:13737	13728	0	9.48058e-06	0.000640968	7.9798e-05	-5.43089	-3.01854	2.41235
SL1344_3416	yheL	SL1344_3416 conserved hypothetical protein 3624317:3624604 reverse MW:10532	10526	0	2.92857e-06	0.000125138	2.34563e-05	0	0	0
SL1344_3417	yheM	SL1344_3417 conserved hypothetical protein 3624612:3624968 reverse MW:13025	13017	0	0	0	0	0	0	0
SL1344_3418	yheN	SL1344_3418 conserved hypothetical protein 3624968:3625354 reverse MW:13757	13749	0	0	0	0	0	0	0
SL1344_3419	yheO	SL1344_3419 conserved hypothetical protein 3625354:3626088 reverse MW:27446	27429	0	0	0	0	0	0	0
SL1344_3420	fkpA	SL1344_3420 FKBP-type peptidyl-prolyl isomerase 3626353:3627171 reverse MW:28945	28927	0	0	0	0	-7.09803	-7.43359	-0.335553
SL1344_3421	slyX	SL1344_3421 conserved hypothetical protein 3627391:3627609 forward MW:8260	8255	0	7.62701e-07	0.000109622	0.000138319	0	0	0
SL1344_3422	slyD	SL1344_3422 FKBP-type peptidyl-prolyl cis-trans isomerase 3627797:3628387 reverse MW:20788	20775	0	0	0	0	-6.64797	-3.63559	3.01238
SL1344_3423	yheV	SL1344_3423 conserved hypothetical protein 3628482:3628682 reverse MW:7640	7636	0	7.46948e-07	7.02178e-05	8.74184e-06	0	0	0
SL1344_3426	yheS	SL1344_3426 probable ABC transporter ATP-binding protein 3631315:3633222 forward MW:71588	71543	0	0	0	0	0	-6.35755	-6.35755
SL1344_3428	0	SL1344_3428 conserved hypothetical protein 3633608:3633919 reverse MW:11650	11643	0	0	0	8.21027e-06	0	-6.56986	-6.56986
SL1344_3431	prkB	SL1344_3431 phosphoribulokinase 3635451:3636320 forward MW:32412	32392	0	0	0	9.50152e-06	0	-6.37504	-6.37504
SL1344_3432	yhfA	SL1344_3432 conserved hypothetical protein 3636416:3636820 reverse MW:14477	14468	0	0	0	8.26068e-06	0	0	0
SL1344_3433	crp	SL1344_3433 cyclic AMP receptor protein,catabolite gene activator 3637128:3637760 forward MW:23656	23641	0	0	0	0	2.80735	-2.47805	-5.2854
SL1344_3434	yhfK	SL1344_3434 conserved membrane protein 3637809:3639896 forward MW:79235	79183	0	7.36661e-07	0	3.91884e-06	0	0	0
SL1344_3435	argD	SL1344_3435 acetylornithine aminotransferase 3639939:3641156 reverse MW:43700	43672	0	0	0	0	-8.29002	-7.87036	0.419654
SL1344_3436	pabA	SL1344_3436 para-aminobenzoate synthase, glutamine amidotransferase component II 3641242:3641805 reverse MW:20801	20788	0	0	3.13108e-05	2.33884e-05	0	0	0
SL1344_3437	fic	SL1344_3437 cell filamentation protein Fic 3641837:3642439 reverse MW:22781	22766	0	0	0	0	0	0	0
SL1344_3439	ppiA	SL1344_3439 peptidyl-prolyl cis-trans isomerase 3642705:3643277 reverse MW:20332	20319	0	0	0	0	-8.37938	0	8.37938
SL1344_3441	nirB	SL1344_3441 nitrite reductase large subunit 3644998:3647541 forward MW:93063	93003	0	0	3.32977e-05	0	0	-8.02791	-8.02791
SL1344_3442	nirD	SL1344_3442 nitrite reductase (NAD(P)H) small subunit 3647538:3647864 forward MW:12096	12089	0	0	0	2.60896e-05	0	0	0
SL1344_3444	cysG	SL1344_3444 siroheme synthase 3648951:3650324 forward MW:50147	50115	0	0	0	0	0	-5.24793	-5.24793
SL1344_3447	yhfL	SL1344_3447 conserved hypothetical protein 3657451:3657621 forward MW:5893	5890	0	0	0	3.83413e-06	0	0	0
SL1344_3448	trpS	SL1344_3448 tryptophanyl-tRNA synthetase 3657766:3658770 reverse MW:37401	37377	0	0	0	0	-9.42836	-7.89482	1.53354
SL1344_3449	gph	SL1344_3449 phosphoglycolate phosphatase 3658763:3659521 reverse MW:27303	27286	0	0	6.8908e-05	2.38299e-05	0	0	0
SL1344_3450	rpe	SL1344_3450 ribulose-phosphate 3-epimerase 3659514:3660191 reverse MW:24491	24476	0	0	0	0	-8.34873	-5.35755	2.99118
SL1344_3452	damX	SL1344_3452 DamX protein 3661226:3662503 reverse MW:45460	45433	0	0	3.25894e-05	4.05725e-06	-8.34873	-7.85798	0.490747
SL1344_3453	aroB	SL1344_3453 3-dehydroquinate synthase 3662601:3663689 reverse MW:38710	38685	0	0	3.25733e-05	2.31728e-05	0	-6.39232	-6.39232
SL1344_3454	aroK	SL1344_3454 shikimate kinase I 3663746:3664267 reverse MW:19470	19458	0	0	0	8.3857e-06	-8.40514	0	8.40514
SL1344_3460	mrcA	SL1344_3460 penicillin-binding protein 1A 3668148:3670724 forward MW:94421	94361	0	0	3.38797e-05	0	0	0	0
SL1344_3461	nudE	SL1344_3461 hypothetical NUDIX hydrolase 3670820:3671383 reverse MW:21241	21228	0	0	0	0	0	0	0
SL1344_3462	yrfF	SL1344_3462 hypothetical membrane protein 3671706:3673838 forward MW:79362	79312	0	0	0	0	0	0	0
SL1344_3463	yrfG	SL1344_3463 hypothetical hydrolase 3673903:3674571 forward MW:25352	25337	0	0	0	0	0	0	0
SL1344_3464	hslR	SL1344_3464 heat shock protein 3674582:3674983 forward MW:15520	15511	0	0	0	0	0	0	0
SL1344_3465	hslO	SL1344_3465 heat shock protein 3675002:3675886 forward MW:32644	32623	0	0	0	0	0	0	0
SL1344_3467	pckA	SL1344_3467 phosphoenolpyruvate carboxykinase 3678085:3679704 forward MW:59647	59610	0	0	0	0	-9.39232	-12.0708	-2.67847
SL1344_3468	envZ	SL1344_3468 two-component sensor kinase EnvZ 3679779:3681014 reverse MW:45864	45835	0	0	6.7159e-05	0.000430213	0	0	0
SL1344_3469	ompR	SL1344_3469 two-component response regulator OmpR 3681128:3681847 reverse MW:27354	27336	0	0	0	0	-9.45121	-7.08746	2.36375
SL1344_3470	greB	SL1344_3470 transcription elongation factor GreB 3682073:3682546 forward MW:18509	18498	0	0	6.99951e-05	1.3594e-05	0	0	0
SL1344_3471	yhgF	SL1344_3471 hypothetical transcription accessory protein 3682648:3684975 forward MW:84864	84811	0	0	0	0	-9.44087	-9.34207	0.0987945
SL1344_3472	feoA	SL1344_3472 hypothetical ferrous iron transport protein 3685412:3685639 forward MW:8338	8334	0	0	6.9492e-05	6.48861e-05	0	-5.42626	-5.42626
SL1344_3473	feoB	SL1344_3473 ferrous iron transport protein B 3685658:3687976 forward MW:84201	84146	0	0	0	4.25071e-06	0	-8.51175	-8.51175
SL1344_3476	bioH	SL1344_3476 hypothetical biotin biosynthesis protein 3689410:3690180 reverse MW:28268	28250	0	0	0	3.64805e-05	0	0	0
SL1344_3478	yhgI	SL1344_3478 conserved hypothetical protein 3690960:3691535 forward MW:20937	20924	0	0	0	0	3	3	0
SL1344_3480	malQ	SL1344_3480 4-alpha-glucanotransferase 3693347:3695425 reverse MW:78018	77969	0	7.52305e-07	0	0	0	-6.32193	-6.32193
SL1344_3481	malP	SL1344_3481 maltodextrin phosphorylase 3695435:3697828 reverse MW:90186	90129	0	0	0	7.95353e-06	0	-8.87958	-8.87958
SL1344_3482	malT	SL1344_3482 MalT regulatory protein 3698422:3701127 forward MW:102964	102899	0	0	0	4.7119e-05	0	0	0
SL1344_3484	0	SL1344_3484 conserved hypothetical protein (homologue of DnaJ: DNA damage inducible protein) 3701493:3701753 reverse MW:9446	9441	0	0	0	0	0	0	0
SL1344_3486	rtcB	SL1344_3486 hypothetical protein 3702885:3704102 reverse MW:44810	44781	0	0	0	0	0	0	0
SL1344_3491	glpG	SL1344_3491 hypothetical membrane protein 3708621:3709451 reverse MW:31399	31378	0	0	0	0	0	0	0
SL1344_3493	glpD	SL1344_3493 aerobic glycerol-3-phosphate dehydrogenase 3710052:3711560 forward MW:56925	56889	0	0	0	0	-3.11473	-6.97465	-3.85992
SL1344_3498	0	SL1344_3498 hypothetical dehydratase 3716593:3718308 forward MW:61985	61945	0	7.36343e-06	6.40934e-05	0.000930686	0	0	0
SL1344_3500	0	SL1344_3500 hypothetical IclR-family transcriptional regulator 3719301:3720056 reverse MW:27895	27878	0	0	0	0	0	0	0
SL1344_3501	glgP	SL1344_3501 glycogen phosphorylase 3720234:3722681 reverse MW:93344	93285	0	0	0	0	0	-8.03342	-8.03342
SL1344_3502	glgA	SL1344_3502 glycogen synthase 3722701:3724134 reverse MW:52946	52912	0	0	0	2.61687e-05	0	-8.11374	-8.11374
SL1344_3503	glgC	SL1344_3503 glucose-1-phosphate adenylyltransferase 3724134:3725429 reverse MW:48462	48431	0	0	0	2.76622e-05	0	-7.48382	-7.48382
SL1344_3504	glgX	SL1344_3504 glycogen operon protein 3725444:3727420 reverse MW:73612	73565	0	0	0	1.79089e-05	0	0	0
SL1344_3505	glgB	SL1344_3505 1,4-alpha-glucan branching enzyme 3727417:3729603 reverse MW:84275	84222	0	0	0	0	0	-7.01123	-7.01123
SL1344_3506	asd	SL1344_3506 aspartate-semialdehyde dehydrogenase 3729950:3731056 reverse MW:40136	40111	0	0	0	1.28871e-05	-8.36194	-7.87652	0.485427
SL1344_3508	gntK	SL1344_3508 hypothetical gluconokinase 3732817:3733350 reverse MW:19646	19634	0	0	3.28659e-05	2.35272e-05	0	0	0
SL1344_3509	gntR	SL1344_3509 gluconate utilization operon repressor 3733489:3734484 reverse MW:36511	36488	0	0	0	0	0	0	0
SL1344_3510	yhhW	SL1344_3510 conserved hypothetical protein 3734614:3735309 reverse MW:26210	26194	0	0	0	0	0	0	0
SL1344_3511	yhhX	SL1344_3511 hypothetical oxidoreductase 3735433:3736470 reverse MW:38718	38694	0	0	0	0	0	-7	-7
SL1344_3512	yhhY	SL1344_3512 hypothetical acetyltransferase 3736939:3737427 forward MW:18681	18669	0	0	0	1.28282e-05	0	0	0
SL1344_3516	0	SL1344_3516 puative phophotriesterase 3740705:3741739 forward MW:37540	37516	0	0	0	0	0	0	0
SL1344_3518	yhhA	SL1344_3518 hypothetical protein 3743652:3744068 forward MW:15299	15290	0	0	0	0	0	0	0
SL1344_3519	ugpQ	SL1344_3519 glycerophosphoryl diester phosphodiesterase 3744081:3744821 reverse MW:27381	27364	0	0	0	0	0	0	0
SL1344_3523	ugpB	SL1344_3523 glycerol-3-phosphate-binding periplasmic protein 3747683:3748975 reverse MW:47483	47453	0	0	0	0	-6.40939	-5.43045	0.978938
SL1344_3524	kil	SL1344_3524 death on curing protein 3749258:3749626 reverse MW:13588	13579	0	7.96196e-07	6.80431e-05	3.44895e-05	0	0	0
SL1344_3525	phd	SL1344_3525 prevent host death protein 3749623:3749850 reverse MW:8430	8425	0	0	0	0	0	0	0
SL1344_3530	livK	SL1344_3530 leucine-specific binding protein 3753715:3754824 reverse MW:39371	39346	0	0	0	0	0	-7.02237	-7.02237
SL1344_3531	yhhK	SL1344_3531 conserved hypothetical protein 3755246:3755629 forward MW:14480	14471	0	0	0	1.30443e-05	0	0	0
SL1344_3532	livJ	SL1344_3532 leu/ile/val/thr-binding protein 3755824:3756927 reverse MW:39032	39008	0	0	0	0	0	-7.01123	-7.01123
SL1344_3534	ftsX	SL1344_3534 cell division protein 3758349:3759404 reverse MW:38627	38602	0	0	0	1.29323e-05	0	0	0
SL1344_3535	ftsE	SL1344_3535 cell division ATP-binding protein FtsE 3759397:3760065 reverse MW:24399	24384	0	0	0	0	0	0	0
SL1344_3536	ftsY	SL1344_3536 cell division protein 3760068:3761543 reverse MW:53731	53698	0	0	0	0	0	-7.41785	-7.41785
SL1344_3537	rsmD	SL1344_3537 conserved hypothetical protein 3761669:3762265 forward MW:21888	21874	0	0	0	1.71177e-05	0	0	0
SL1344_3539	yhhM	SL1344_3539 hypothetical inner membrane protein 3762546:3762788 reverse MW:9105	9100	0	0	0	0	0	0	0
SL1344_3541	zntA	SL1344_3541 heavy metal-transporting ATPase 3763766:3765964 forward MW:77178	77129	0	0	0	0	0	-6.30378	-6.30378
SL1344_3542	tcp	SL1344_3542 methyl-accepting chemotaxis citrate transducer 3766164:3767807 forward MW:58950	58914	0	0	0	7.86784e-06	0	-7.81378	-7.81378
SL1344_3543	yhhP	SL1344_3543 conserved hypothetical protein 3767831:3768076 reverse MW:9192	9187	0	0	0	2.25366e-05	0	0	0
SL1344_3545	0	SL1344_3545 hypothetical lipoprotein 3768984:3769541 forward MW:19687	19675	0	0	0	0	-5.06633	-2.05954	3.00679
SL1344_3548	acpT	SL1344_3548 conserved hypothetical protein 3771995:3772573 forward MW:20799	20786	0	8.86606e-06	0.000298242	3.713e-05	0	0	0
SL1344_3549	nikR	SL1344_3549 nickel responsive regulator 3772665:3773066 forward MW:15064	15056	0	0	0	0	0	0	0
SL1344_3551	yhiH	SL1344_3551 hypothetical ABC transporter ATP-binding protein 3774280:3777021 reverse MW:100500	100435	0	0	0	0	0	0	0
SL1344_3552	yhiI	SL1344_3552 hypothetical HlyD family secretion protein 3777018:3778085 reverse MW:38996	38972	0	0	0	0	0	-5.32193	-5.32193
SL1344_3553	yhiN	SL1344_3553 hypothetical exported protein 3778391:3779587 reverse MW:43586	43558	0	0	0	3.97549e-06	0	0	0
SL1344_3554	pitA	SL1344_3554 hypothetical low-affinity inorganic phosphate transporter 3779941:3781314 forward MW:49111	49079	0	0	0	0	0	-5.24793	-5.24793
SL1344_3556	uspA	SL1344_3556 universal stress protein A 3782177:3782611 forward MW:16080	16070	0	0	0	3.75487e-06	0	-11.258	-11.258
SL1344_3557	yhiP	SL1344_3557 hypothetical PTR2 family transport protein 3782936:3784408 forward MW:53671	53635	0	0	0	0.000244868	0	0	0
[truncated: 577 more rows]
