# Supplementary material for: Transcriptome and proteome analysis of Salmonella enterica serovar Typhimurium systemic infection of wild type and immune-deficient mice
Source: PLoS One. 2017 Aug 10;12(8):e0181365. doi: 10.1371/journal.pone.0181365 (PMC5552096; doi:10.1371/journal.pone.0181365)
Supplement: S13 Table — The pathways that were statistically over-represented among the DE proteins are listed for each of the datasets compared. (XLS) [file pone.0181365.s013.xls]

## Sheet: Sheet1
Datasets compared	Number of DE proteins (up-regulated proteins, down-regulated proteins, at FDR <= 0.05 and Fold Change >= 2.0)
Group 1 vs Group 2	Total: 518
	Up-regulated: 68
	Down-regulated: 450
Group 1 vs Group 3	Total: 1507
	Up-regulated: 37
	Down-regulated: 1020
Group 2 vs Group 3	Total: 830
	Up-regulated: 147
	Down-regulated: 683
