# Supplementary material for: Transcriptome and proteome analysis of Salmonella enterica serovar Typhimurium systemic infection of wild type and immune-deficient mice
Source: PLoS One. 2017 Aug 10;12(8):e0181365. doi: 10.1371/journal.pone.0181365 (PMC5552096; doi:10.1371/journal.pone.0181365)
Supplement: S14 Table — Table showing the relative gene expression (log2 fold-change) in Group 1, Group 2, and Group 3 mice compared to the in vitro grown Input and host Group vs Group comparisons, at different time points. (XLS) [file pone.0181365.s014.xls]

## Sheet: Sheet1
ID	Gene	Gene Name	6h_Group 1/0h_uninfected	72h_Group 1/0h_uninfected	6h_Group 2/0h_uninfected	48h_Group 2/0h_uninfected	6h_Group 3/0h_uninfected	72h_Group 3/0hr_uninfected	hr72_Group 1/h6_Group 1	hr48_Group 2/hr6_Group 2	hr72_Group 3/hr6_Group 3	P-Value	Adjusted P-Value
N5Tu50o4njwJ33Sq9I	Il1rn	interleukin 1 receptor antagonist	0.576049	3.1442	0.715315	2.97518	0.0743843	4.44869	2.56815	2.25986	4.3743	2.79161e-12	4.91239e-08
Tih0InhS.lDi6paLpA	Saa3	serum amyloid A 3	0.706386	6.25691	1.36598	6.4694	0.312534	6.52947	5.55052	5.10343	6.21693	1.91281e-11	3.36598e-07
3GtcKjKJ7eyg7gEtGU	Ccl7	chemokine (C-C motif) ligand 7	0.0952764	2.43105	0.0502359	2.70459	-0.0279724	1.80332	2.33578	2.65436	1.83129	2.51101e-11	4.41862e-07
u3ihxSJbR.n5eUaDUo	Timp1	tissue inhibitor of metalloproteinase 1	0.833006	3.27072	1.18679	2.51924	0.0164798	4.62748	2.43772	1.33246	4.611	2.8828e-10	5.07286e-06
rcUiW0f5_XlGg1KfuQ	Timp1	tissue inhibitor of metalloproteinase 1	0.860956	3.19583	1.17555	2.5102	0.0737987	4.65608	2.33487	1.33465	4.58228	3.45273e-10	6.07577e-06
Nqae3qtlyzs73uBGDA	Ier3	immediate early response 3	0.315731	2.13822	0.344324	2.1005	0.634487	4.20593	1.82249	1.75618	3.57145	2.34605e-09	4.12835e-05
3pOoEL3fSd6nJeoB9U	Itgad	integrin, alpha D	-0.320491	-1.55786	-0.271625	-2.10137	0.0223192	-1.65217	-1.23737	-1.82975	-1.67449	3.06099e-09	5.38642e-05
BX2M091_uQpROoRA1w	Rrbp1	ribosome binding protein 1	0.350304	1.10362	0.327657	1.27006	0.218546	1.62442	0.753318	0.942404	1.40588	3.10316e-09	5.46062e-05
xoh4eU5PnuJH9.tvS8	Slc40a1	solute carrier family 40 (iron-regulated transporter), member 1	-0.318689	-0.771094	-0.353983	-1.78918	0.196131	-2.81712	-0.452404	-1.4352	-3.01326	3.20568e-09	5.64104e-05
xnuSc_tE_q7EUq3VLE	F7	coagulation factor VII	0.0189231	1.0506	-0.048849	0.975679	0.0665652	0.792511	1.03168	1.02453	0.725946	3.76837e-09	6.6312e-05
0on_4LcS9zAlqFwe_k	Xist	inactive X specific transcripts	-0.0138357	-0.655927	-0.255847	-0.290508	3.69181	0.154534	-0.642091	-0.0346614	-3.53728	4.26309e-09	7.50176e-05
iOd._i0hA7q8z3pVk0	Adamts4	a disintegrin-like and metallopeptidase (reprolysin type) with thrombospondin type 1 motif, 4	0.10198	0.611866	0.0688644	0.821717	0.0332936	1.48592	0.509887	0.752852	1.45263	4.91564e-09	8.65005e-05
3sXqc09dxRv3zzh4gU	Slc7a11	solute carrier family 7 (cationic amino acid transporter, y+ system), member 11	0.129987	1.58435	0.0839616	1.31419	0.0861232	1.94596	1.45436	1.23022	1.85983	5.08985e-09	8.95662e-05
iWlKSPUFOIddRN0bXI	Itgad	integrin, alpha D	-0.221207	-1.80376	-0.207647	-2.5972	0.315808	-1.54219	-1.58255	-2.38955	-1.858	5.20431e-09	9.15802e-05
EdBqKsFMJSoeHF8BRc	Arg1	arginase, liver	0.0224433	1.18769	-0.00543698	0.345287	-0.00116187	1.14642	1.16524	0.350724	1.14759	6.01347e-09	0.000105819
NSOkfwEsvnt7tqS65I	Clcn7	chloride channel 7	0.019006	1.49583	-0.0807956	1.26647	0.15145	1.178	1.47682	1.34727	1.02655	7.33689e-09	0.000129107
HSN7uif7gtxL3MCWoU	Xist	inactive X specific transcripts	-0.0992038	-0.748566	-0.24914	-0.233565	3.11025	0.15298	-0.649363	0.0155755	-2.95727	1.02699e-08	0.00018072
ZRJFVQuXUvfRSv9ERI	Batf2	basic leucine zipper transcription factor, ATF-like 2	0.542465	3.23091	0.358144	2.79508	0.0689656	3.39783	2.68844	2.43693	3.32886	1.147e-08	0.000201837
ZUF7nSTge4TSX_MsoQ	Gas7	growth arrest specific 7	0.254561	1.6355	0.298436	1.53122	0.0783411	1.81449	1.38093	1.23279	1.73615	1.2206e-08	0.000214789
iknu7Iv0iQvXSS7I4M	Snx10	sorting nexin 10	0.402965	1.84908	0.335393	1.41234	-0.0510011	1.4325	1.44611	1.07695	1.4835	1.28834e-08	0.000226709
01F71J7uJ9OPu4Qd3U	Dram1	DNA-damage regulated autophagy modulator 1	0.507433	2.12185	0.390371	1.37525	0.418117	2.28688	1.61442	0.984878	1.86877	1.59847e-08	0.000281283
B1QaV3uhoN_iIe3mvg	Mlkl	mixed lineage kinase domain-like	0.771851	2.28374	0.406451	1.86287	0.66917	2.5539	1.51189	1.45642	1.88473	1.79985e-08	0.00031672
Hs0vfoNGHFOeAqeXeI	Dusp16	dual specificity phosphatase 16	-0.0876769	0.859973	-0.0261069	1.07114	-0.412876	1.32147	0.94765	1.09724	1.73435	1.96805e-08	0.000346318
HKelEfiJ5Klf5zrtf0	Il10	interleukin 10	0.131252	1.76788	0.0493944	1.93805	0.0641649	2.00252	1.63663	1.88865	1.93835	1.97771e-08	0.000348018
Bl_qv1FNfUjOs4INzk	Fam129b	family with sequence similarity 129, member B	0.0709829	0.920104	0.234921	1.13457	0.0450206	2.04441	0.849121	0.899648	1.99939	2.40231e-08	0.000422734
KQnQI4o.q.3MCJ9eSo	Cfb	complement factor B	0.230856	1.81478	0.430158	2.29837	-0.386878	0.738021	1.58392	1.86822	1.1249	2.59057e-08	0.000455862
otfSbQ70_07x405Ptg	Fos	FBJ osteosarcoma oncogene	-0.0792934	0.965319	-0.0113196	0.726834	-0.0741919	1.06702	1.04461	0.738154	1.14121	2.61994e-08	0.000461031
EilRJSEexIiIOIt_oE	Gbp7	guanylate binding protein 7	0.416889	1.91652	0.575113	1.8669	-0.0755852	1.46147	1.49964	1.29179	1.53706	2.86616e-08	0.000504358
o6QVXk_6tyrq1_uuIQ	Cdkn1a	cyclin-dependent kinase inhibitor 1A (P21)	0.223792	1.32846	0.203939	1.18393	0.0723395	1.75833	1.10467	0.979993	1.68599	3.0352e-08	0.000534104
Hh3g1R2iC.B3pstFlo	Cd14	CD14 antigen	1.39106	3.70275	1.44073	3.05353	0.154038	5.47739	2.31168	1.6128	5.32335	3.19812e-08	0.000562772
3abd7f7AtRON3e00iA	Cbfa2t3	core-binding factor, runt domain, alpha subunit 2, translocated to, 3 (human)	0.128185	-0.52654	0.16666	-0.790333	-0.186917	-1.22183	-0.654726	-0.956994	-1.03491	3.19876e-08	0.000562886
le.det23Z2oSIb0Ch4	Cxcl1	chemokine (C-X-C motif) ligand 1	0.602223	3.21355	0.981043	3.2182	0.179672	5.23348	2.61132	2.23716	5.05381	3.67723e-08	0.000647083
ckc4eq57Lfz47f1Exc	Sod2	superoxide dismutase 2, mitochondrial	1.09127	2.72415	1.18169	2.76245	-0.125307	2.54688	1.63289	1.58076	2.67219	3.99943e-08	0.000703779
HAyFSJK.n9pHhIQJS4	Dusp1	dual specificity phosphatase 1	0.128868	2.36076	0.158988	2.14769	-0.0755497	3.18525	2.23189	1.9887	3.2608	4.01617e-08	0.000706725
9Qqa0AL_X4V4JVXr0g	Cxcl2	chemokine (C-X-C motif) ligand 2	0.172629	2.88777	0.138816	2.57621	0.0671623	5.23463	2.71514	2.43739	5.16747	4.46354e-08	0.000785449
rr51fnvwKcQ0iSf_nk	Plk2	polo-like kinase 2	0.00961623	0.37507	-0.0393409	0.692913	-0.119314	0.643479	0.365453	0.732254	0.762793	4.72749e-08	0.000831896
H.sPsn73UUXh6p57tU	Ass1	argininosuccinate synthetase 1	0.277264	1.77894	0.297317	1.36657	0.143726	2.27083	1.50168	1.06926	2.1271	5.06913e-08	0.000892014
EzkopLpZL.WKku5Qic	Pla1a	phospholipase A1 member A	0.0765201	2.31129	0.0161328	2.51118	0.0961951	2.59638	2.23477	2.49504	2.50019	5.68213e-08	0.000999884
xoLeZ4JU0gurYopzJM	Ccl7	chemokine (C-C motif) ligand 7	0.180315	3.71039	0.206792	3.61273	0.0546447	3.94679	3.53007	3.40594	3.89214	6.56022e-08	0.0011544
ToCHsqH__CgC15.qV4	Tmem106a	transmembrane protein 106A	0.350941	1.13532	0.282536	1.16179	0.0235512	0.660092	0.784384	0.879249	0.636541	7.06335e-08	0.00124294
fjQsv6H0VhowZmfkvU	Phlda1	pleckstrin homology-like domain, family A, member 1	-0.316133	0.238454	-0.317422	-0.0150179	0.103987	1.5281	0.554588	0.302404	1.42412	7.60481e-08	0.00133822
BoLiULTX5yp.97siKg	Irak3	interleukin-1 receptor-associated kinase 3	0.325881	1.52601	0.431086	1.4343	-0.0700154	1.92754	1.20013	1.00322	1.99756	7.82983e-08	0.00137782
KVOiOtRT5793nPujOE	Ccl4	chemokine (C-C motif) ligand 4	1.49516	5.17914	1.08588	4.71016	-0.0290807	6.00754	3.68397	3.62428	6.03662	9.16187e-08	0.00161221
u6ggogXgpJUoosTQmY	Aldoa	aldolase A, fructose-bisphosphate	0.139536	1.16832	0.421856	1.42671	-0.438338	0.935111	1.02878	1.00486	1.37345	1.01901e-07	0.00179315
ck.Bu95.ESKNkW4luc	Tgm2	transglutaminase 2, C polypeptide	0.499991	2.21437	0.581585	1.83185	0.0705917	2.29738	1.71438	1.25027	2.22679	1.0713e-07	0.00188517
BEmRav2ofjkNaNAbp4	Cebpb	CCAAT/enhancer binding protein (C/EBP), beta	0.81498	2.89871	0.727677	2.42463	0.683395	3.70266	2.08373	1.69695	3.01927	1.09152e-07	0.00192074
oUU7_8NXd5.XyYsEfo	Mmp13	matrix metallopeptidase 13	0.748732	4.03203	0.363909	1.02547	0.0756823	2.79112	3.2833	0.661559	2.71543	1.09544e-07	0.00192765
lSt5N3tESyuef6noog	Sco1	SCO cytochrome oxidase deficient homolog 1 (yeast)	0.14154	1.12663	0.125318	0.668439	0.258791	1.04212	0.985087	0.543121	0.783328	1.09627e-07	0.0019291
ifqpwqJ0ShHiQ6eNf0	Cdkn1a	cyclin-dependent kinase inhibitor 1A (P21)	0.306937	1.43411	0.289789	1.53616	-0.037739	1.35944	1.12717	1.24637	1.39718	1.18968e-07	0.00209347
Bbp4sy8e5X_A6XK.co	Acss1	acyl-CoA synthetase short-chain family member 1	-0.431364	-1.23932	-0.372831	-1.2576	0.0990313	-1.56526	-0.807953	-0.88477	-1.66429	1.19791e-07	0.00210797
Te725.eIH2xomLrkLE	Tlr2	toll-like receptor 2	0.451204	1.77689	0.502042	1.24812	0.371866	2.85508	1.32569	0.746073	2.48322	1.20975e-07	0.0021288
rSJ6lcuzsx_IheH7Xo	Gna13	guanine nucleotide binding protein, alpha 13	-0.0413359	0.763711	-0.0446167	0.522278	-0.234451	0.716385	0.805047	0.566894	0.950837	1.36934e-07	0.00240963
EVd97CIgId4pSnLkok	Gm12185	predicted gene 12185	0.0959566	0.925836	0.0053443	0.908895	0.0374141	0.845541	0.829879	0.903551	0.808127	1.65338e-07	0.00290946
f5fAfqIoEdKnpaRkVo	Elovl1	elongation of very long chain fatty acids (FEN1/Elo2, SUR4/Elo3, yeast)-like 1	0.0481674	0.658955	0.216584	0.930923	0.311885	0.903216	0.610788	0.71434	0.591332	1.6646e-07	0.0029292
ZSkunSp1_rk7sy_CeU	Luzp1	leucine zipper protein 1	-0.0334047	1.00141	0.0280533	1.10323	-0.150703	0.622792	1.03482	1.07517	0.773495	1.7169e-07	0.00302124
cGet58fScU.0henXlE	Hsd3b7	hydroxy-delta-5-steroid dehydrogenase, 3 beta- and steroid delta-isomerase 7	-0.0491587	0.908091	-0.0921356	0.557865	0.321391	1.10571	0.95725	0.65	0.784319	1.75454e-07	0.00308747
35ToSTleDJ99d7nbYg	4930599N23Rik	RIKEN cDNA 4930599N23 gene	0.236041	1.10391	0.101404	0.834972	0.0474934	1.21227	0.867865	0.733569	1.16478	1.76985e-07	0.0031144
oSb3V3qank6DiXUdIs	Wars	tryptophanyl-tRNA synthetase	0.22376	1.76022	0.202398	1.81951	0.0613107	1.78871	1.53646	1.61711	1.7274	1.7955e-07	0.00315953
raKdWidsTc6c745xs0	Psmb6	proteasome (prosome, macropain) subunit, beta type 6	0.117632	0.92258	0.208932	0.925647	-0.182972	0.517855	0.804948	0.716716	0.700827	1.84449e-07	0.00324575
KSM.pN3Cug4lR1ER4w	Nfkbiz	nuclear factor of kappa light polypeptide gene enhancer in B cells inhibitor, zeta	0.433931	1.60056	0.243549	1.42891	-0.247696	2.07386	1.16663	1.18536	2.32156	1.97247e-07	0.00347096
xbqICyqKLUBSlFIjr4	Vdr	vitamin D receptor	0.0464733	0.965987	0.00288112	0.976764	0.00965394	1.19783	0.919514	0.973883	1.18817	2.03424e-07	0.00357964
uQyeig7ONAilqBZbso	Il33	interleukin 33	0.1458	0.581319	0.441353	0.480685	-0.143905	1.21399	0.435518	0.0393319	1.35789	2.18294e-07	0.00384133
6II46A04ViK5IcOH4I	Rps3a1	ribosomal protein S3A1	0.0797809	-0.176151	0.620821	0.25057	-1.42289	-1.63548	-0.255932	-0.370251	-0.21259	2.39992e-07	0.00422315
lK77FZiOZ662I5WiEg	Il12rb1	interleukin 12 receptor, beta 1	0.096032	0.916482	-0.0191198	0.65132	0.0790151	0.729985	0.82045	0.670439	0.65097	2.42535e-07	0.00426788
lf6U0p2uELlfFN3UnU	Cyfip1	cytoplasmic FMR1 interacting protein 1	0.107299	0.279213	0.0506721	0.289325	0.0619856	0.830556	0.171914	0.238653	0.76857	2.47406e-07	0.0043536
KTXreh7cV8lZFUIE7M	Cdkn1a	cyclin-dependent kinase inhibitor 1A (P21)	0.812095	2.75019	0.594455	2.07336	0.00677947	2.83231	1.9381	1.4789	2.82553	2.73854e-07	0.00481902
BJ.uOjxziFJLf51CUk	Ccl4	chemokine (C-C motif) ligand 4	0.729511	3.88707	0.6231	3.77888	-0.0226758	4.91918	3.15756	3.15578	4.94185	2.78248e-07	0.00489633
ri3_4Cguf70k7nOkgU	Mmp3	matrix metallopeptidase 3	0.552753	1.85029	0.770337	2.20146	0.0119708	1.62467	1.29754	1.43113	1.6127	2.8194e-07	0.0049613
ZrsodTHS4SpKCJQIwU	Atf3	activating transcription factor 3	0.138093	1.00353	-0.00200787	0.818363	0.0611864	0.797287	0.865433	0.820371	0.736101	2.89385e-07	0.00509231
63k3d0LVJ54Sl9ezVI	Zswim4	zinc finger SWIM-type containing 4	-0.0280304	0.354123	0.0288432	0.283405	0.162332	1.00327	0.382154	0.254562	0.840943	2.9067e-07	0.00511492
9X30XG7V4FKKkJQ5e4	Acot7	acyl-CoA thioesterase 7	0.130326	0.863586	0.0494373	0.624104	0.252757	1.05896	0.73326	0.574667	0.806202	2.98356e-07	0.00525017
KUtQF_jF3LeUHvR7.0	Slc2a6	solute carrier family 2 (facilitated glucose transporter), member 6	0.794205	2.40219	0.568541	2.46098	-0.0686822	2.66831	1.60799	1.89244	2.73699	3.11274e-07	0.00547748
Nsu97vzUWsmOVF9SWo	Mif	macrophage migration inhibitory factor	0.131386	1.06592	-0.126712	0.95532	0.0573204	1.41165	0.934538	1.08203	1.35432	3.22593e-07	0.00567667
3qUzjggTJ33hTS17S4	Mefv	Mediterranean fever	0.345496	1.46199	0.360405	1.32042	0.0746592	1.36767	1.11649	0.960015	1.29301	3.26787e-07	0.00575047
rflSsz50f3FEoPfBRI	Gbp5	guanylate binding protein 5	0.652192	2.78489	0.515102	2.52924	-0.140366	2.20957	2.1327	2.01414	2.34994	3.35992e-07	0.00591244
im3wR5xHrrK3TtBXkg	Mrc1	mannose receptor, C type 1	-1.21025	-1.69992	-1.21085	-2.52425	0.512213	-1.61212	-0.489676	-1.3134	-2.12434	3.39666e-07	0.00597709
o1FRS8KU_w9cLHsp3o	Jdp2	Jun dimerization protein 2	0.00570556	0.975531	0.082413	1.05208	0.0939836	0.989398	0.969825	0.969663	0.895415	3.53701e-07	0.00622408
Z8TTkwqSJnS7tUnpXo	Ece2	endothelin converting enzyme 2	0.177552	0.650655	0.25417	0.715206	0.0792149	0.754469	0.473102	0.461036	0.675254	3.62683e-07	0.00638214
Eenq9LJGd_P6bS0ARI	Ms4a6d	membrane-spanning 4-domains, subfamily A, member 6D	2.19184	4.24076	2.2449	3.41172	0.970716	4.38066	2.04891	1.16682	3.40994	3.75648e-07	0.00661028
ird_3ilP7rp_DKDpVU	Ptges	prostaglandin E synthase	-0.0115649	0.348311	-0.11707	0.55577	-0.00500167	1.07574	0.359876	0.67284	1.08074	3.83546e-07	0.00674925
0NeEXTJ63XgBDsMoJU	Aoah	acyloxyacyl hydrolase	0.0802331	0.993021	0.112816	1.10063	0.0208138	0.434252	0.912788	0.987813	0.413439	3.86756e-07	0.00680575
KuuvK3XRsJEqC3uC3E	Dusp16	dual specificity phosphatase 16	-0.091073	1.3366	-0.137712	1.165	-0.372571	2.05057	1.42767	1.30271	2.42314	3.86889e-07	0.00680809
0RV0aU1Kev_wjnq_uQ	Furin	furin (paired basic amino acid cleaving enzyme)	-0.0589397	1.0919	-0.103309	0.592401	0.501285	2.06019	1.15084	0.69571	1.5589	4.08264e-07	0.00718422
En9K.d6nyp0e_1VR9I	Cd209b	CD209b antigen	-0.164256	-1.19593	0.0186936	-1.33731	0.744511	-0.406787	-1.03168	-1.35601	-1.1513	4.17231e-07	0.00734201
cPwJfr9_nsQ6n6wR0U	Avpr1a	arginine vasopressin receptor 1A	-0.107899	0.322644	-0.182205	0.279055	-0.330086	1.04053	0.430543	0.46126	1.37061	4.36738e-07	0.00768528
WoW3kKIUjQR1UY7n7o	Upp1	uridine phosphorylase 1	0.629283	4.33379	0.613383	3.87497	0.973554	5.35272	3.70451	3.26159	4.37916	4.3799e-07	0.00770731
NjUpQAutWrl.dTFLfY	Dhx58	DEXH (Asp-Glu-X-His) box polypeptide 58	0.837706	1.66447	0.674628	1.08223	0.500524	1.67542	0.826764	0.407597	1.17489	4.39209e-07	0.00772876
0VckdcNKEiC2XBXC7c	Serpina3f	serine (or cysteine) peptidase inhibitor, clade A, member 3F	1.70454	4.99778	0.918604	4.29126	0.241479	4.32174	3.29325	3.37265	4.08026	4.64653e-07	0.00817649
uewe65SuN4RXTEhMTk	Gbp7	guanylate binding protein 7	0.277011	1.1717	0.211391	1.27581	-0.0153213	1.03792	0.894685	1.06442	1.05325	4.72558e-07	0.00831561
laHft6e8E4fvxEz.SU	Hps3	Hermansky-Pudlak syndrome 3 homolog (human)	-0.0429696	-0.39167	0.0308546	-0.448525	-0.684223	-0.870134	-0.348701	-0.479379	-0.185911	4.79474e-07	0.0084373
ouKCQIJxiCBl_RLOLU	Eef1b2	eukaryotic translation elongation factor 1 beta 2	0.0591445	-0.231297	0.333214	0.247252	-1.24689	-1.4412	-0.290441	-0.0859621	-0.194307	5.08919e-07	0.00895544
Krn9I8O3l3tIwFdIwc	Ptx3	pentraxin related gene	0.0294925	0.700524	0.0150605	0.711981	-0.0524456	0.260359	0.671032	0.69692	0.312805	5.14627e-07	0.00905589
fUeEegyg7jqbZFd7A4	Mbp	myelin basic protein	-0.0949989	-0.944805	-0.0772468	-0.970325	0.201399	-0.800732	-0.849807	-0.893078	-1.00213	5.15991e-07	0.0090799
f3ZCz1LKu_TKKFCBGU	Wdr6	WD repeat domain 6	-0.28903	-0.698152	-0.312264	-0.738246	-0.166695	-0.615006	-0.409122	-0.425982	-0.448311	5.20337e-07	0.00915638
iqjhRqjmuOIJ0CWP10	Ubd	ubiquitin D	0.560904	4.03518	0.0318176	3.64551	-0.592857	2.99717	3.47427	3.61369	3.59002	5.23946e-07	0.00921988
xx3C9TqfgO7vjmKH.o	Kmt2e	lysine (K)-specific methyltransferase 2E	-0.147251	-0.697679	-0.0396687	-0.421975	-1.03625	-1.42271	-0.550427	-0.382307	-0.386464	5.27942e-07	0.0092902
TVTdf1Ze9QLl8y0wHs	Ccdc86	coiled-coil domain containing 86	0.445681	1.24575	0.324487	0.78217	0.465703	1.72364	0.800064	0.457683	1.25794	5.30034e-07	0.00932701
rod6umOmNf1ufJT51w	Fcgr4	Fc receptor, IgG, low affinity IV	0.80681	2.75817	0.460665	2.06688	0.682099	2.99405	1.95136	1.60622	2.31195	5.4911e-07	0.00966268
ELpnJoAroIfs_mdLks	Dnah2	dynein, axonemal, heavy chain 2	0.118056	0.804975	0.0842009	1.22585	-0.015398	0.607228	0.686919	1.14165	0.622626	5.71737e-07	0.0100608
K50teZwdS2eV70uO3o	Tmem2	transmembrane protein 2	-0.112808	1.42715	-0.298595	1.03326	0.368943	2.17527	1.53996	1.33185	1.80632	5.74275e-07	0.0101055
EVa6985EoSEuu7R5Ic	Gdf15	growth differentiation factor 15	0.281137	1.82658	0.339288	1.82684	0.205544	0.704894	1.54544	1.48755	0.49935	6.06957e-07	0.0106806
Ts4kTXdvapFnpQRsQg	Myo10	myosin X	0.167403	0.9075	0.105503	0.562192	0.164549	0.661577	0.740097	0.456689	0.497028	6.23003e-07	0.010963
6iNu5.1C5UUF1x97F0	Btbd3	BTB (POZ) domain containing 3	-0.00723068	0.390006	0.00178685	0.566155	-0.140061	0.752115	0.397236	0.564368	0.892177	6.49627e-07	0.0114315
lLeQVTkeCnJ03WdcX0	Cd209b	CD209b antigen	-0.280897	-1.68529	-0.0708745	-1.81369	0.69521	-0.852594	-1.40439	-1.74282	-1.5478	6.71093e-07	0.0118092
EVciAB7Q_6oDjghf6k	Hbb-bt	hemoglobin, beta adult t chain	0.111599	-2.1999	0.782016	-1.78356	-1.40236	-2.86964	-2.3115	-2.56557	-1.46728	6.72334e-07	0.0118311
HSHd1YIsbjZ5TS3cTo	Tmbim4	transmembrane BAX inhibitor motif containing 4	0.313148	1.20522	0.110294	0.577743	0.482021	1.47495	0.892073	0.46745	0.99293	6.99164e-07	0.0123032
om6iAsqii1AUpRSI68	Vdr	vitamin D receptor	-0.00966314	0.563779	0.0534602	0.728462	0.00659588	0.783184	0.573442	0.675001	0.776588	7.1677e-07	0.012613
rKeXSrf.nyJXJy0cgI	Igtp	interferon gamma induced GTPase	0.996164	2.85726	0.649243	2.32006	0.520319	3.03576	1.8611	1.67082	2.51544	7.24754e-07	0.0127535
68GuAaVyirZ3L4HdSk	Fosl2	fos-like antigen 2	-0.235308	1.07556	-0.102917	0.850741	0.336944	2.63884	1.31087	0.953658	2.30189	7.36086e-07	0.0129529
EVdf76zb6c51Uet.u8	Cdc42ep2	CDC42 effector protein (Rho GTPase binding) 2	0.334598	1.34627	0.314072	0.95723	-0.0689006	1.73743	1.01168	0.643158	1.80633	7.71292e-07	0.0135724
WRJbXv3ej562c4ih2U	Slc15a3	solute carrier family 15, member 3	0.883332	2.18511	0.599714	1.98245	0.145108	2.89406	1.30178	1.38274	2.74895	7.72214e-07	0.0135887
l6Fws33vr8U_Ld9XiI	Hilpda	hypoxia inducible lipid droplet associated	0.193081	2.28362	0.0824491	1.67423	-0.00912756	3.14289	2.09054	1.59178	3.15202	7.82496e-07	0.0137696
ToiOnihXj0PVJFSSUQ	Samhd1	SAM domain and HD domain, 1	0.209339	1.41197	0.428665	1.1244	0.109162	2.02462	1.20263	0.695739	1.91546	8.27259e-07	0.0145573
rpBQgUl1IJQhUF4l18	Itprip	inositol 1,4,5-triphosphate receptor interacting protein	-0.12729	0.324144	-0.143408	0.312691	-0.248482	0.800405	0.451434	0.456099	1.04889	8.27951e-07	0.0145695
loEp7VTh9frlxCeQTg	AU022252	expressed sequence AU022252	-0.0258491	0.451523	0.0158936	0.391124	0.00171398	0.466886	0.477372	0.37523	0.465172	8.31333e-07	0.014629
Kb9RN4IL7gX01qjnRE	Hfe	hemochromatosis	-0.274661	-0.900322	-0.0264126	-1.01671	-0.110427	-0.573353	-0.625661	-0.990299	-0.462927	8.3967e-07	0.0147757
fMJeJfJ1ScqpPPzoUc	Plk3	polo-like kinase 3	-0.0704729	0.663193	-0.0238584	0.755091	0.0304751	1.20534	0.733666	0.77895	1.17487	8.5407e-07	0.0150291
ugu1r16Wu7n3_MOmOU	Trib1	tribbles homolog 1 (Drosophila)	0.0343314	0.422748	-0.0865265	0.292838	0.130763	1.00459	0.388416	0.379365	0.873824	8.54228e-07	0.0150319
ZDOSDsiRtVeGehIlOI	Psmb1	proteasome (prosome, macropain) subunit, beta type 1	0.00907024	1.75507	0.116406	1.89767	0.0582486	2.06612	1.746	1.78127	2.00787	8.88484e-07	0.0156347
3Ue85ajerROfNd7tFI	Ffar2	free fatty acid receptor 2	0.209683	1.21718	-0.140061	0.443102	-0.0546863	1.05395	1.0075	0.583163	1.10863	8.96841e-07	0.0157817
EcpP6n5x_FPdle4DtU	Enc1	ectodermal-neural cortex 1	0.178516	1.61245	-0.0308881	1.31775	0.0188108	2.19733	1.43393	1.34863	2.17852	9.1771e-07	0.0161489
BK_EAwKc_UpKeiI6dI	Zc3h12a	zinc finger CCCH type containing 12A	0.128339	0.474008	0.0591526	0.591503	-0.155184	0.547986	0.34567	0.532351	0.703171	9.31618e-07	0.0163937
NdTJuz17nc7yLkw4mY	Cables1	CDK5 and Abl enzyme substrate 1	0.01061	0.515876	-0.00876996	0.457694	0.0447943	0.561209	0.505266	0.466464	0.516415	9.34319e-07	0.0164412
oBEqC_ToRxLYhBQgSU	Ywhab	tyrosine 3-monooxygenase/tryptophan 5-monooxygenase activation protein, beta polypeptide	0.0287561	-0.136297	0.311657	0.199698	-1.15939	-1.20797	-0.165053	-0.11196	-0.0485744	9.37818e-07	0.0165028
KdUejV3xeQbt73b3sk	Ypel3	yippee-like 3 (Drosophila)	-0.359853	-1.19532	-0.504392	-1.38576	0.20191	-1.12061	-0.835472	-0.881371	-1.32252	1.00543e-06	0.0176925
fxRCeandOkSaHx_g6U	Tlr6	toll-like receptor 6	0.20681	0.776615	0.152875	0.590073	0.310254	1.78709	0.569805	0.437198	1.47684	1.04335e-06	0.0183598
Tl11cUh3F3kJfqDR4o	Rgs16	regulator of G-protein signaling 16	-0.0175361	0.379779	-0.044765	0.144188	0.143974	1.65926	0.397315	0.188953	1.51528	1.04707e-06	0.0184253
fiJ677uC74uku9XOlQ	Acot7	acyl-CoA thioesterase 7	0.147815	1.00109	-0.118012	0.676468	0.168303	1.3799	0.85327	0.79448	1.21159	1.096e-06	0.0192864
lWu3ofTm_u3kfid.u0	Sh3pxd2b	SH3 and PX domains 2B	-0.0277282	1.04345	-0.0425602	0.791442	0.0126346	1.37934	1.07118	0.834002	1.3667	1.10333e-06	0.0194153
rpxRJfNCEUIe99dFSk	Ikbke	inhibitor of kappaB kinase epsilon	0.364578	1.62446	0.000675196	1.46529	-0.0368375	1.99308	1.25988	1.46462	2.02992	1.10852e-06	0.0195067
QnN0o5YE4v3f4Xb6gA	Clk1	CDC-like kinase 1	-0.167089	-0.562858	-0.174567	-0.263894	-0.820035	-1.10147	-0.395768	-0.0893269	-0.281435	1.15448e-06	0.0203153
rgqqaKrVRN7sDIU7II	Mt2	metallothionein 2	-0.000847642	0.265692	0.0162379	0.563998	0.061291	1.02715	0.266539	0.54776	0.96586	1.16063e-06	0.0204236
BVR0pfYp7eCOfgAdBQ	Socs3	suppressor of cytokine signaling 3	0.702544	2.72551	0.77094	2.40752	0.574508	3.80695	2.02297	1.63658	3.23244	1.16766e-06	0.0205473
lrUOciqIFw5C7l_UVQ	Pvrl2	poliovirus receptor-related 2	0.148046	0.754578	0.179711	0.896701	-0.0620476	0.912274	0.606532	0.71699	0.974322	1.17795e-06	0.0207283
NeIeJVnrfeoCugCe_g	Naa25	N(alpha)-acetyltransferase 25, NatB auxiliary subunit	0.198383	0.632633	0.152479	0.497446	0.233632	1.02016	0.43425	0.344967	0.786528	1.22875e-06	0.0216223
E0GpnH7enVOIvOaOk0	Fcna	ficolin A	0.0625015	-1.18781	-0.0387469	-2.00025	-0.0193083	-1.72	-1.25031	-1.96151	-1.70069	1.26817e-06	0.0223161
cr6eCKeO7p7rFTv84A	Oas1g	2'-5' oligoadenylate synthetase 1G	1.19936	2.40355	1.18928	2.03027	0.572962	2.42072	1.20419	0.840992	1.84776	1.29629e-06	0.0228107
uVzOxQuxcvp5dWUd4c	Mmp14	matrix metallopeptidase 14 (membrane-inserted)	0.0308708	2.01736	0.386231	1.91035	-0.284555	2.21911	1.98649	1.52412	2.50366	1.2973e-06	0.0228286
0x4k65oKULFqJ_X7SI	Stk19	serine/threonine kinase 19	0.0228256	0.733483	-0.090599	0.731382	-0.0102346	0.529731	0.710657	0.821981	0.539966	1.29827e-06	0.0228456
liHed814oceD3.BVxU	Pvrl2	poliovirus receptor-related 2	0.15165	0.997859	0.260405	1.11675	-0.223701	0.82213	0.846209	0.856349	1.04583	1.30695e-06	0.0229984
6VUa5QJV7Pu.uBTXE4	Tpi1	triosephosphate isomerase 1	-0.0638926	1.49937	-0.0102178	1.2093	0.351111	1.9474	1.56326	1.21952	1.59629	1.32839e-06	0.0233756
r6XPBASeUddEg7vVN4	Acp2	acid phosphatase 2, lysosomal	0.482221	1.45641	0.678243	1.2101	-0.182363	0.733653	0.97419	0.53186	0.916015	1.34613e-06	0.0236878
Zi6gH_T93dfNffsITU	Lgals3	lectin, galactose binding, soluble 3	0.252487	1.56479	0.23256	1.4107	-0.198818	0.755527	1.31231	1.17814	0.954345	1.40375e-06	0.0247018
0aIi2NU1XkisMOQvK4	Gdf10	growth differentiation factor 10	-0.497808	-1.56234	-0.256455	-1.69277	-0.358214	-1.50751	-1.06453	-1.43631	-1.1493	1.45627e-06	0.025626
WnJK81wCT0RXq3V5BY	Mmp3	matrix metallopeptidase 3	0.824662	2.61445	1.19757	2.5068	0.500976	3.6275	1.78979	1.30923	3.12653	1.52633e-06	0.0268588
Kah_XI45PUKv31_0jo	Abcc3	ATP-binding cassette, sub-family C (CFTR/MRP), member 3	-0.735076	-0.999502	-0.725014	-1.18948	0.154962	-1.06387	-0.264427	-0.464461	-1.21884	1.52977e-06	0.0269194
oSzkn5gSYeoCw61cfk	Nus1	nuclear undecaprenyl pyrophosphate synthase 1 homolog (S. cerevisiae)	0.172265	0.877133	0.169517	0.723408	-0.0180747	1.18332	0.704868	0.553891	1.2014	1.55382e-06	0.0273426
u8Dj0fbu.kfQCagnX8	Hpgd	hydroxyprostaglandin dehydrogenase 15 (NAD)	-0.216581	-0.937511	0.2118	-1.309	-0.368101	-1.09322	-0.720929	-1.5208	-0.72512	1.55657e-06	0.027391
rHekX9EEk8SL5Ck9go	Arg2	arginase type II	0.0676652	0.83962	0.228796	0.911081	0.11094	1.17998	0.771955	0.682286	1.06904	1.58195e-06	0.0278375
3tU6K6Up65nTeLL3j8	Creb5	cAMP responsive element binding protein 5	0.0315254	0.444144	0.0666696	0.177593	0.0182732	0.382668	0.412618	0.110923	0.364395	1.58208e-06	0.0278398
od1x949qnX_Re7_oUY	Cstb	cystatin B	0.517694	2.07947	0.344901	1.48994	0.133427	2.28256	1.56177	1.14503	2.14913	1.67671e-06	0.029505
95LnXSF4OL1U6_6kEU	Upp1	uridine phosphorylase 1	0.365921	3.2941	0.346559	2.89452	0.537079	4.10564	2.92818	2.54796	3.56856	1.69905e-06	0.0298982
ufa5Lf9c6pAAqSZfoo	Nos2	nitric oxide synthase 2, inducible	-0.0238299	0.940649	-0.0681123	0.527593	0.0937098	1.61704	0.964479	0.595705	1.52333	1.74771e-06	0.0307545
ZeqyEgWevoE1c6k57E	Trf	transferrin	-0.189135	-1.65876	-0.313574	-2.7976	0.480917	-1.16513	-1.46962	-2.48403	-1.64605	1.764e-06	0.0310411
BkX5ALrXpurI_e_tfw	Igf1	insulin-like growth factor 1	-0.292526	-0.900024	-0.147268	-1.23775	0.126483	-0.938482	-0.607498	-1.09048	-1.06497	1.77235e-06	0.031188
WoKLuTvRNP._wkWKIs	Cxcl2	chemokine (C-X-C motif) ligand 2	0.19064	2.61592	0.23104	2.68389	-0.012306	3.05908	2.42528	2.45285	3.07139	1.77468e-06	0.0312291
ffRHwyKPWH1rXgufRU	Ifitm3	interferon induced transmembrane protein 3	0.913239	1.43624	0.679004	1.29485	0.458169	1.9553	0.523001	0.615848	1.49713	1.81079e-06	0.0318644
H1YeeV_d6ufC6k3oB4	Siglech	sialic acid binding Ig-like lectin H	0.159188	-0.350838	0.428539	-0.358261	0.183554	-0.100944	-0.510026	-0.7868	-0.284498	1.82887e-06	0.0321827
xriD0vkj_IuKIn91L4	Lhfp	lipoma HMGIC fusion partner	-0.0962042	-0.729488	0.225356	-0.659847	-0.604414	-0.790526	-0.633284	-0.885203	-0.186112	1.83401e-06	0.0322731
xUElVNegpQ4IEcFujo	Itga5	integrin alpha 5 (fibronectin receptor alpha)	-0.00150594	0.439198	-0.0231253	0.456695	0.137802	0.779033	0.440704	0.479821	0.641231	1.87866e-06	0.0330588
HluqE6C0.uTo7ku6EU	Ppa1	pyrophosphatase (inorganic) 1	0.51268	1.5061	0.253729	1.2233	0.319148	2.01744	0.993419	0.969575	1.69829	1.91652e-06	0.033725
Qo6xAOh3uIDnoBb0pY	Dusp16	dual specificity phosphatase 16	-0.0333064	0.779874	0.0222717	1.00073	-0.771643	0.409836	0.81318	0.978461	1.18148	1.95364e-06	0.0343782
li4rcoSUicRIgHe3QI	Siglech	sialic acid binding Ig-like lectin H	-0.300545	-1.60839	-0.200949	-1.53318	-1.17922	-1.90039	-1.30784	-1.33223	-0.721177	1.97847e-06	0.0348151
rfU3nq3fg4ZHXb_H6g	9130230L23Rik	RIKEN cDNA 9130230L23 gene	0.0235855	0.158556	0.00508622	0.305955	0.00831476	0.598446	0.134971	0.300869	0.590131	1.98466e-06	0.034924
0vVCIk3tL76QDjAhP4	Hbb-bs	hemoglobin, beta adult s chain	0.231809	-2.88225	0.30923	-3.04185	-0.817243	-3.02954	-3.11406	-3.35108	-2.2123	2.03307e-06	0.035776
BtF7vMrHdpfTTlSUxs	Gbp2	guanylate binding protein 2	1.41129	3.73061	0.762303	2.77412	0.298297	4.2197	2.31932	2.01182	3.9214	2.03451e-06	0.0358013
E23VIh.QdSnDAPni3s	Rarres2	retinoic acid receptor responder (tazarotene induced) 2	-0.0652214	0.935136	0.126059	1.58906	-1.04358	-0.315591	1.00036	1.463	0.727986	2.06786e-06	0.0363881
TEkpSEkdg4tKywSntU	Ifng	interferon gamma	0.32363	3.25685	0.0978186	2.15137	-0.00513391	3.03993	2.93322	2.05355	3.04507	2.10317e-06	0.0370095
xJ6yK56fULeOlote3c	Fblim1	filamin binding LIM protein 1	0.127299	1.23295	0.140499	1.19203	0.301851	1.18054	1.10565	1.05153	0.878691	2.12542e-06	0.0374009
NuVoOyKwupQLsTQhQQ	Hsd17b12	hydroxysteroid (17-beta) dehydrogenase 12	0.280694	0.647189	0.498306	0.708285	-0.176769	0.24656	0.366495	0.209979	0.423329	2.13581e-06	0.0375839
KReXx6jVO78sPwbUng	Sec13	SEC13 homolog (S. cerevisiae)	0.141993	0.493075	-0.0219062	0.20908	0.135174	0.543006	0.351082	0.230987	0.407832	2.13632e-06	0.0375928
lq_HSp1ed1QKM5nkgA	Nrm	nurim (nuclear envelope membrane protein)	-0.152189	-1.23214	-0.154099	-1.44489	0.0130917	-1.01254	-1.07995	-1.29079	-1.02563	2.17334e-06	0.0382442
HOM9OaJIk1E1bU91bc	Enpp4	ectonucleotide pyrophosphatase/phosphodiesterase 4	0.342985	1.03582	0.0731923	0.504818	0.475585	0.900341	0.692838	0.431626	0.424756	2.17622e-06	0.038295
9lES55fC4ORHOgfzhA	Tubb6	tubulin, beta 6 class V	0.561984	1.12331	0.610486	1.38256	-0.441897	1.00646	0.561325	0.772075	1.44835	2.2123e-06	0.0389299
H1ATcCQe2L57VcAAsA	Gadd45b	growth arrest and DNA-damage-inducible 45 beta	0.109653	0.312642	0.0437012	0.556288	-0.142687	0.433252	0.20299	0.512587	0.575938	2.29314e-06	0.0403523
Hq.eyAtfKi727eHSmU	Edn1	endothelin 1	0.0780666	1.04122	0.0707982	1.27666	-0.00666724	2.86796	0.963158	1.20586	2.87463	2.30682e-06	0.0405931
rgoltdgfe6hH9L3D5U	Psma5	proteasome (prosome, macropain) subunit, alpha type 5	0.337488	0.924023	0.11708	0.495291	0.537204	1.43882	0.586535	0.378211	0.901611	2.35734e-06	0.0414821
Nq1KCyDusv4EA6Vcyk	Cr2	complement receptor 2	-0.115983	-0.247619	0.0995431	-0.107681	-0.613043	-0.78445	-0.131636	-0.207224	-0.171407	2.35738e-06	0.0414828
0U99HWV3X_MTH9gOsA	2310022B05Rik	RIKEN cDNA 2310022B05 gene	-0.306589	-1.27462	-0.315176	-1.17499	-0.069481	-1.22397	-0.968036	-0.859816	-1.15449	2.36768e-06	0.041664
B54m66LWb6EWTT4rQY	Apba3	amyloid beta (A4) precursor protein-binding, family A, member 3	-0.0267632	0.562293	-0.13792	0.407616	0.0844615	0.826439	0.589056	0.545536	0.741977	2.43076e-06	0.0427741
BquUuEKOuxA4BHgnNQ	Timd4	T cell immunoglobulin and mucin domain containing 4	-0.0388403	-0.363623	0.0961058	-0.528021	-0.480521	-0.753487	-0.324783	-0.624127	-0.272966	2.48735e-06	0.0437698
cwAgJoKAHCjjbflSu0	Id2	inhibitor of DNA binding 2	0.265362	0.526428	0.370758	0.692578	-0.509239	-0.162264	0.261066	0.32182	0.346975	2.51318e-06	0.0442245
Q6grXU1EXkgBJQpewo	Reep5	receptor accessory protein 5	-0.276183	-0.644406	-0.301819	-0.659184	0.0360809	-0.423786	-0.368223	-0.357365	-0.459866	2.65042e-06	0.0466395
3kqKBhi7nSTL5ecS3g	Pomp	proteasome maturation protein	0.183055	0.674713	0.013145	0.271279	-0.0709878	0.935763	0.491657	0.258134	1.00675	2.67814e-06	0.0471273
