# Supplementary material for: Transcriptome and proteome analysis of Salmonella enterica serovar Typhimurium systemic infection of wild type and immune-deficient mice
Source: PLoS One. 2017 Aug 10;12(8):e0181365. doi: 10.1371/journal.pone.0181365 (PMC5552096; doi:10.1371/journal.pone.0181365)
Supplement: S15 Table — The pathways that were statistically overrepresented among the DE genes are listed for each of the datasets compared. (XLS) [file pone.0181365.s015.xls]

## Sheet: Sheet1
Datasets compared	Number of DE genes (up-regulated genes, down-regulated genes, at FDR <= 0.05 and Fold Change >= 2.0)	Pathways in DE gene datasets
Group 1 6h vs Group 1 0h	Total: 0
	Up-regulated: 0	None
	Down-regulated: 0	None
Group 1 72h vs Group 1 0h	Total: 296
	Up-regulated: 222	Chemokine signalling pathway; Toll-like receptor signalling pathway; NOD-like receptor signalling pathway
	Down-regulated: 74	None
Group 1 72h vs Group 1 6h	Total: 148
	Up-regulated: 123	Toll-like receptor signalling pathway; NOD-like receptor signalling pathway; MAPK signalling pathway; Chemokine signalling pathway
	Down-regulated: 25	None
Group 2 6h vs Group 2 0h	Total: 0
	Up-regulated: 0	None
	Down-regulated: 0	None
Group 2 48h vs Group 2 0h	Total: 281
	Up-regulated: 200	Chemokine signalling pathway; Toll-like receptor signalling pathway; NOD-like receptor signalling pathway; MAPK signalling pathway glycolysis
	Down-regulated: 81	None
Group 2 48h vs Group 2 6h	Total: 148
	Up-regulated: 106	NOD-like receptor signalling pathway; Chemokine signalling pathway
	Down-regulated: 42	None
Group 3 6h vs Group 3 0h	Total: 109
	Up-regulated: 5	None
	Down-regulated: 104	Antigen processing and presentation
Group 3 72h vs Group 3 0h	Total: 668
	Up-regulated: 381	NOD-like receptor signalling pathway; Chemokine signalling pathway; Glycolysis/gluconeogenesis; Apoptosis; Toll-like receptor signalling pathway; p53 signalling pathway
	Down-regulated: 287	Ribosome pathway; B cell receptor signalling pathway; Primary immunodeficiency
Group 3 72h vs Group 3 6h	Total: 308
	Up-regulated: 243	NOD-like receptor signalling pathway; Toll-like receptor signalling pathway; Chemokine signalling pathway; Apoptosis; MAPK signalling pathway; RIG-I-like receptor signalling pathway
	Down-regulated: 65	None
