# Supplementary material for: Transcriptome and proteome analysis of Salmonella enterica serovar Typhimurium systemic infection of wild type and immune-deficient mice
Source: PLoS One. 2017 Aug 10;12(8):e0181365. doi: 10.1371/journal.pone.0181365 (PMC5552096; doi:10.1371/journal.pone.0181365)
Supplement: S16 Table — The pathways that were statistically overrepresented among the DE genes are listed for each of the datasets compared. (XLS) [file pone.0181365.s016.xls]

## Sheet: Sheet1
Datasets compared	Number of DE genes (up-regulated genes, down-regulated genes, at FDR <= 0.05 and Fold Change >= 2.0)	KEGG pathways in DE gene datasets
Group 1 6h vs Group 1 0h - unique	Total: 0
	Up-regulated: 0	None
	Down-regulated: 0	None
Group 2 6h vs Group 2 0h - unique	Total: 0
	Up-regulated: 0	None
	Down-regulated: 0	None
Group 3 6h vs Group 3 0h - unique	Total: 109
	Up-regulated: 5	None
	Down-regulated: 104	Ribosome; Antigen processing and presentation
‘Group 1 6h vs Group 1 0h’ vs ‘Group 2 6h vs Group 2 0h’ - shared	Total: 0
	Up-regulated: 0	None
	Down-regulated: 0	None
‘Group 1 6h vs Group 1 0h’ vs ‘Group 3 6h vs Group 3 0h’ - shared	Total: 0
	Up-regulated: 0	None
	Down-regulated: 0	None
‘Group 2 6h vs Group 2 0h’ vs ‘Group 3 6h vs Group 3 0h’ - shared	Total: 0
	Up-regulated: 0	None
	Down-regulated: 0	None
‘Group 1 6h vs Group 1 0h’ vs ‘Group 2 6h vs Group 2 0h’ vs ‘Group 3 6h vs Group 3 0h’ - shared	Total: 0
	Up-regulated: 0	None
	Down-regulated: 0	None
Group 1 72h vs Group 1 0h - unique	Total: 24
	Up-regulated: 19	None
	Down-regulated: 5	None
Group 2 48h vs Group 2 0h - unique	Total: 41
	Up-regulated: 27	None
	Down-regulated: 14	None
Group 3 72h vs Group 3 0h - unique	Total: 420
	Up-regulated: 195	Toll-like receptor signalling pathway
	Down-regulated: 225	Ribosome; B cell receptor signalling pathway; Primary immunodeficiency
‘Group 1 72h vs Group 1 0h’ vs ‘Group 2 48h vs Group 2 0h’ - shared	Total: 42
	Up-regulated: 24	None
	Down-regulated: 18	None
‘Group 1 72h vs Group 1 0h’ vs ‘Group 3 72h vs Group 3 0h’ - shared	Total: 50
	Up-regulated: 37	None
	Down-regulated: 13	None
‘Group 2 48h vs Group 2 0h’ vs ‘Group 3 72h vs Group 3 0h’ - shared	Total: 18
	Up-regulated: 7	None
	Down-regulated: 11	None
‘Group 1 72h vs Group 1 0h’ vs ‘Group 2 48h vs Group 2 0h’ vs ‘Group 3 72h vs Group 3 0h’ - shared	Total: 180
	Up-regulated: 142	Chemokine signalling pathway; Toll-like receptor signalling pathway; RIG-I-like receptor signalling pathway; NOD-like receptor signalling pathway
	Down-regulated: 38	None
Group 1 72h vs Group 1 6h - unique	Total: 14
	Up-regulated: 10	None
	Down-regulated: 4	None
Group 2 48h vs Group 2 6h - unique	Total: 31
	Up-regulated: 11	None
	Down-regulated: 20	NOD-like receptor signalling pathway; Chemokine signalling pathway; Toll-like receptor signalling pathway
Group 3 72h vs Group 3 6h - unique	Total: 176
	Up-regulated: 130	Toll-like receptor signalling pathway
	Down-regulated: 46	None
‘Group 1 72h vs Group 1 6h’ vs ‘Group 2 48h vs Group 2 6h’ - shared	Total: 19
	Up-regulated: 12	None
	Down-regulated: 7	None
‘Group 1 72h vs Group 1 6h’ vs ‘Group 3 72h vs Group 3 6h’ - shared	Total: 34
	Up-regulated: 30	NOD-like receptor signalling pathway
	Down-regulated: 4	None
‘Group 2 48h vs Group 2 6h’ vs ‘Group 3 72h vs Group 3 6h’ - shared	Total: 17
	Up-regulated: 12	None
	Down-regulated: 5	None
‘Group 1 72h vs Group 1 6h’ vs ‘Group 2 48h vs Group 2 6h’ vs ‘Group 3 72h vs Group 3 6h’ - shared	Total: 81
	Up-regulated: 71	NOD-like receptor signalling pathway; Chemokine signalling pathway
	Down-regulated: 10	None
