# Supplementary material for: Transcriptome and proteome analysis of Salmonella enterica serovar Typhimurium systemic infection of wild type and immune-deficient mice
Source: PLoS One. 2017 Aug 10;12(8):e0181365. doi: 10.1371/journal.pone.0181365 (PMC5552096; doi:10.1371/journal.pone.0181365)
Supplement: S17 Table — Table showing In vivo vs In vivo comparisons. (XLS) [file pone.0181365.s017.xls]

## Sheet: Gp 1 6h vs Gp 1 0h
Upregulated	Downregulated
None	None

## Sheet: Gp 2 6h vs Gp 2 0h
Upregulated	Downregulated
None	None

## Sheet: Gp 3 6h vs Gp 3 6h
Upregulated	Downregulated
Hsd11b1	2510042H12Rik
Htatip2	Actr3
Ppp2cb	Aif1
Tmed10	Apol7c
Xist	Arhgef1
	Arpc2
	Atf4
	Atp13a1
	Btg1
	Ccr6
	Cct8
	Cd52
	Chd7
	Chordc1
	Ctsb
	Ctsz
	Dazap2
	Ddx3y
	Eef1b2
	Eif1
	Eif2s3y
	Eif3k
	Fam134b
	Fcrla
	Ftl1
	Fuca1
	Gimap5
	Ginm1
	Gltscr2
	Gm10029
	Gm14407
	Gm6548
	Gpr171
	Grcc10
	H2-Aa
	H2-K1
	H2-T23
	Hbb-bt
	Hspa8
	Hsph1
	Ifi27l2a
	Igfbp3
	Il11ra1
	Il16
	Irf2bpl
	Irf8
	Ist1
	Jkamp
	Klra4
	Kmt2e
	Lsm14b
	Mapk11
	Mcl1
	Med28
	Mif4gd
	Mpeg1
	Mrpl52
	Naca
	Ndst1
	Nfe2l1
	Nt5c
	Pabpc1
	Pkig
	Polr2g
	Ptp4a2
	Ptpn1
	Ptpn18
	Ptpre
	Rarres2
	Rin3
	Rnase6
	Rpl18a
	Rpl32
	Rps12l2
	Rps3a1
	Sash3
	Scd1
	Siglech
	Slamf6
	Slc50a1
	Slco2b1
	Smim14
	Snx8
	Stat3
	Stk17b
	Swap70
	Tcof1
	Tex261
	Tk2
	Tmem109
	Tmem176b
	Tsc22d3
	Ube2q1
	Ubxn1
	Usp10
	Vav2
	Wasf2
	Wipf1
	Ywhab
	Ywhaz
	Zc3h12d
	Zeb2
	Zfp263
	Zfp36l1

## Sheet: Gp 1 72h vs Gp 1 0h
Upregulated	Downregulated
4930599N23Rik	2310022B05Rik
AA467197	2510042H12Rik
Abcc5	4930426D05Rik
Acer3	Abcc3
Acp2	Acss1
Adora2b	Adam23
Aldoa	Ahnak
Angptl4	AI467606
Aoah	Alas2
Arg1	Apoe
Asprv1	Arhgap4
Ass1	Arhgef1
Atf3	Bnip3l
Batf	Camk2n1
Batf2	Ccdc80
Bcl3	Cirbp
Bst2	Clec4g
C1qb	Coch
Car13	Crip2
Casp4	Cx3cr1
Casp7	Cyp27a1
Ccdc86	Dmpk
Ccl2	Esm1
Ccl3	Fcer2a
Ccl4	Fcgrt
Ccl7	Fcna
Ccl9	Fcrla
Ccrl2	Gas6
Cd14	Gdf10
Cd274	Gja1
Cdc42ep2	Gm4671
Cdkn1a	Gng10
Cebpb	H2-Ke6
Cfb	Hcst
Ch25h	Hmha1
Chil3	Igfbp5
Clcn7	Itgad
Clec4a1	Klf2
Clec4d	Ldb1
Clec4e	Limch1
Cnih4	Lrmp
Col4a1	Ltbp4
Cp	Lynx1
Creld2	Mef2c
Cst7	Mrc1
Cstb	Mum1
Ctsc	Myl4
Cxcl1	Nrep
Cxcl10	Nrm
Cxcl16	Pcdh12
Cxcl2	Prelp
Cxcl9	Ptp4a3
Ddhd1	Rasa3
Dhx58	Rims3
Dram1	Sft2d2
Dtx3l	Siglecg
Dusp1	Slc12a2
Dusp16	Slc40a1
Ebi3	Slc46a3
Edn1	Slc4a1
Ehd1	Slc9a3r2
Eif2ak2	Smim14
Enc1	Spon2
Enpp4	Srpk3
Errfi1	Sspn
F10	Stbd1
F7	Swap70
Fam26f	Tcf21
Fas	Timp2
Fblim1	Tmem204
Fbxl5	Tnxb
Fcer1g	Trf
Fcgr3	Vpreb3
Fcgr4	Ypel3
Ffar2
Fosl2
Fpr2
Gas7
Gbp10
Gbp2
Gbp2b
Gbp3
Gbp5
Gbp7
Gdf15
Glipr2
Glrx
Gm4951
Gm5483
Gng12
Gp49a
Gpnmb
Gpr31b
Gpr84
Gvin1
Hcar2
Hdc
Hilpda
Hk3
Hmox1
Hp
Icam1
Ier3
Ifi47
Ifit2
Ifitm1
Ifitm3
Ifng
Igtp
Ikbke
Il10
Il15ra
Il18
Il1a
Il1b
Il1r2
Il1rn
Irak3
Irf1
Irf7
Irgm1
Irgm2
Itga5
Lacc1
Lcn2
Lgals3
Lgals3bp
Lgmn
Lilrb4
Lox
Luzp1
Ly6a
Ly6c1
Man2a1
Marco
Mefv
Mif
Mlkl
Mmp13
Mmp14
Mmp3
Mrap
Mrgpra2b
Mrgpra7
Ms4a6d
Ms4a7
Msrb1
Mt1
Nfkbiz
Nr1h3
Nrg4
Oas1g
Oas2
Oas3
Oasl1
Oasl2
Pdk4
Pex11a
Pfkl
Phf11d
Pkm
Pla1a
Plin2
Plod3
Ppa1
Prdx5
Psmb1
Rab32
Rapgef2
Rgs1
Rnf213
Rrbp1
Saa3
Samhd1
Sap30
Sco1
Sct
Sdc4
Sdf2l1
Serpina3f
Serpina3g
Serpina3n
Serping1
Sh3pxd2b
Sirpa
Slamf7
Slc11a1
Slc15a3
Slc2a6
Slc31a1
Slc7a11
Slc7a2
Slfn1
Smpdl3b
Snx10
Socs3
Sod2
Stat1
Stat2
Tgm2
Tgtp1
Timp1
Tlr13
Tlr2
Tmem106a
Tmem2
Tnf
Tnfaip2
Tnfaip3
Tnip1
Tpi1
Trafd1
Trim30d
Tspo
Tubb6
Ubd
Upp1
Usp18
Vmp1
Wars
Wfdc17
Xdh

## Sheet: Gp 1 72h vs Gp 1 6h
Upregulated	Downregulated
AA467197	2310022B05Rik
Abcc5	2510042H12Rik
Adora2b	Adam23
Arg1	Alas2
Ass1	Apol7c
Batf2	Arl4c
Bst2	Atp2a3
Car13	Cirbp
Ccl2	Cx3cr1
Ccl3	Dbp
Ccl4	Emp3
Ccl7	Esm1
Ccl9	Fcer2a
Ccrl2	Fcna
Cd14	Gdf10
Cdkn1a	Gng10
Cebpb	Gucy1a3
Cfb	Hcst
Ch25h	Igfbp5
Clcn7	Ltbp4
Clec4d	Nrm
Cp	Slc46a3
Cst7	Timp2
Cstb	Tnxb
Ctsc	Trf
Cxcl1
Cxcl2
Cxcl9
Ddhd1
Dram1
Dusp1
Dusp16
Ebi3
Enc1
F10
F7
Fam26f
Fas
Fblim1
Fbxl5
Fcgr3
Fcgr4
Fos
Fosl2
Gas7
Gbp2
Gbp2b
Gbp5
Gbp7
Gdf15
Glipr2
Glrx
Gm4951
Gng12
Gpnmb
Gpr84
Hilpda
Hk3
Hmox1
Hsd3b7
Ier3
Ifng
Igtp
Ikbke
Il10
Il1b
Il1r2
Il1rn
Irak3
Irgm1
Itga5
Lacc1
Lgals3
Lox
Luzp1
Man2a1
Mefv
Mlkl
Mmp13
Mmp14
Mmp3
Mrgpra7
Ms4a6d
Mt1
Nfkbiz
Nrg4
Oas1g
Oasl1
Pkm
Pla1a
Plin2
Prdx5
Psmb1
Rab32
Rarres2
Saa3
Samhd1
Serpina3f
Sh3pxd2b
Slamf7
Slc11a1
Slc15a3
Slc2a6
Slc31a1
Slc7a11
Slc7a2
Smpdl3b
Snx10
Socs3
Sod2
Tgm2
Timp1
Tlr2
Tmem2
Tnf
Tnfaip2
Tnfaip3
Tnip1
Tpi1
Ubd
Upp1
Wars
Wfdc17

## Sheet: Gp 2 48h vs Gp 2 0h
Upregulated	Downregulated
4930486L24Rik	2310022B05Rik
AA467197	2510042H12Rik
Acp2	4930426D05Rik
Aldoa	Abcc3
Angptl4	Acadm
Aoah	Acss1
Asprv1	Adam23
Ass1	AI467606
Atf5	Alas2
Batf	Apoe
Batf2	Apol7c
C3	Arhgap4
C4b	Arhgef6
Car13	Bnip3l
Casp4	Ccdc80
Ccl2	Cirbp
Ccl3	Ckb
Ccl4	Clec4g
Ccl7	Coch
Ccl9	Crip2
Ccrl2	Cx3cr1
Cd14	Cyp27a1
Cd274	Dennd3
Cd63	Dmpk
Cdkn1a	Esm1
Cebpb	Fam78a
Cfb	Fbrsl1
Ch25h	Fcer2a
Clcn7	Fcgrt
Clec4a1	Fcna
Clec4d	Fhl1
Clec4e	Fn1
Cmpk2	Fnbp1
Col4a1	Gas6
Cp	Gdf10
Creld2	Gja1
Cst7	Gm2a
Cstb	Gng10
Ctsz	H2-Ke6
Cxcl1	Hcst
Cxcl10	Hist1h1c
Cxcl16	Hpgd
Cxcl2	Igfbp5
Cxcl9	Itgad
Ddit4	Klf2
Dhx58	Limch1
Dnah2	Ltbp4
Dram1	Lynx1
Dusp1	Man2b1
Dusp16	Mef2c
Ebi3	Mrc1
Edn1	Mycl
Eif2ak2	Nedd9
Enc1	Nrep
Errfi1	Nrm
F10	Pcdh12
Fam129b	Pisd-ps1
Fam26f	Pld4
Fas	Prelp
Fblim1	Rhof
Fcgr4	Rims3
Fkbp5	Sdpr
Fpr2	Sepp1
Gadd45b	Slc12a2
Gadd45g	Slc12a6
Gas7	Slc40a1
Gbp10	Slc46a3
Gbp2	Slc4a1
Gbp2b	Spon2
Gbp3	Sspn
Gbp5	St6gal1
Gbp7	Sun2
Gdf15	Swap70
Glrx	Tcf21
Gm4951	Timp2
Gng12	Tmem204
Gpnmb	Tnxb
Gpr84	Trf
Gpx3	Txnip
Gvin1	Vpreb3
H2-T23	Ypel3
Hcar2
Hilpda
Hk3
Hmox1
Hspb1
Hspb8
Hsph1
Icam1
Ier3
Ifi47
Ifit2
Ifitm1
Ifitm3
Ifng
Igtp
Ikbke
Il10
Il1b
Il1r2
Il1rn
Irak3
Irf7
Irgm1
Irgm2
Itga5
Jdp2
Lacc1
Lcn2
Lgals1
Lgals3
Lilrb4
Lox
Lrg1
Lrrc59
Luzp1
Ly6a
Ly6c1
Marco
Mefv
Mif
Mlkl
Mmp14
Mmp3
Mrap
Mrgpra2b
Mrgpra7
Ms4a6d
Ms4a7
Msrb1
Mt1
Mydgf
Nfkbiz
Nupr1
Oas1g
Oas2
Oasl1
Oasl2
Pdk4
Pex11a
Pfkl
Pgk1
Phf11d
Pkm
Pla1a
Plin2
Plod3
Por
Ppa1
Prdx5
Psmb1
Psmb10
Ptpn1
Pvrl2
Rab32
Rarres2
Rnf213
Rrbp1
Saa3
Samhd1
Sct
Sdc4
Sdf2l1
Serpina3f
Serpina3g
Serpina3n
Serping1
Serpinh1
Slc11a1
Slc15a3
Slc2a6
Slc7a11
Slfn1
Slfn2
Smpdl3b
Snx10
Socs3
Sod2
Tgm2
Tgtp1
Timp1
Tlr2
Tmem106a
Tmem119
Tmem2
Tnf
Tnfaip2
Tnfaip3
Tnip1
Tpi1
Tspo
Tubb6
Ubd
Upp1
Usp18
Vmp1
Wars
Wdr92
Wfdc17
Xdh

## Sheet: Gp 2 48h vs Gp 2 6h
Upregulated	Downregulated
Ass1	2510042H12Rik
Batf2	Adam23
C4a	Alas2
C4b	Apoe
Ccl2	Apol7c
Ccl3	Ccdc80
Ccl4	Cirbp
Ccl7	Clec4g
Ccrl2	Coch
Cd14	Col14a1
Cdkn1a	Csf1r
Cebpb	Cx3cr1
Cfb	Dbp
Clcn7	Fam65b
Clec4d	Fcer2a
Cp	Fcna
Creld2	Fcrla
Cst7	Fdps
Cstb	Fhl1
Ctsz	Fn1
Cxcl1	Gdf10
Cxcl2	Gja1
Cxcl9	Gng10
Cyp2d22	Hcst
Dnah2	Hhex
Dusp1	Hpgd
Dusp16	Igfbp5
Edn1	Ltbp4
Enc1	Mrc1
F10	Mycl
Fam26f	Nrep
Fblim1	Nrm
Fcgr4	Rn18s
Fkbp5	Sepp1
Gas7	Sh3kbp1
Gbp2	Sirpb1a
Gbp2b	Slc40a1
Gbp5	Slc46a3
Gbp7	Slc4a1
Gdf15	Tcf21
Gm4951	Treml4
Gpnmb	Trf
Hilpda
Hk3
Hsd3b7
Hspb8
Ier3
Ifng
Igtp
Ikbke
Il10
Il1r2
Il1rn
Irak3
Irf7
Itga5
Lacc1
Lgals3
Lox
Luzp1
Maged1
Mif
Mlkl
Mmp14
Mmp3
Mrap
Mrgpra7
Mt1
Nfkbiz
Oasl1
Pdk4
Pex11a
Pfkl
Pkm
Pla1a
Plin2
Por
Prdx5
Prf1
Psmb1
Rarres2
Saa3
Sct
Serpina3f
Serpina3n
Slamf7
Slc11a1
Slc15a3
Slc2a6
Slc7a11
Smpdl3b
Snx10
Socs3
Sod2
Susd2
Tgm2
Timp1
Tmem119
Tmem2
Tnf
Tnfaip2
Tpi1
Ubd
Upp1
Wars
Xdh

## Sheet: Gp 3 72h vs Gp 3 0h
Upregulated	Downregulated
1810055G02Rik	1700021K19Rik
4930599N23Rik	1810064F22Rik
AA467197	2310022B05Rik
Acer3	2510042H12Rik
Acot7	4933427G23Rik
Adam8	6720418B01Rik
Adamts2	Abcc3
Adamts4	Abi3
Adora2b	Acss1
Ak2	Adam23
Akap12	Adrbk2
Alas1	Ahnak
Alox5ap	Ahsp
Angpt2	AI467606
Angptl4	Alas2
Ankrd22	Anxa6
Antxr2	Aoc3
Anxa3	Apol7c
Aoah	Araf
Apaf1	Arhgap15
App	Arhgap17
Arg1	Arhgef1
Arg2	Arid1b
Arrdc4	Arid2
Asprv1	Arl4c
Ass1	Arpc2
Atp2a2	Asb2
Batf	Atf4
Batf2	Atp2a3
Bcl3	Bcas2
Bst2	Bcl11a
C2	Bcl11b
Car13	Bcl9l
Casp4	Blk
Casp7	Bnip3l
Ccdc86	Brd3
Ccl11	Btg1
Ccl2	Card11
Ccl3	Cav1
Ccl4	Cbx7
Ccl7	Ccdc80
Ccng1	Ccl21a
Ccr5	Ccl21c
Ccrl2	Ccr6
Cd14	Cd19
Cd274	Cd22
Cd300lf	Cd27
Cd33	Cd37
Cd63	Cd52
Cd69	Cd72
Cd80	Cd79b
Cd9	Cd81
Cd93	Cdr2
Cdc42ep2	Chchd10
Cdc42ep4	Chka
Cdkn1a	Chst3
Cebpb	Ciita
Ch25h	Ckb
Chic2	Clec4g
Chil1	Clk1
Chil3	Cnr2
Chil4	Coch
Chmp4b	Crip2
Cish	Csf1r
Clcn7	Csnk1g3
Clec4d	Ctsb
Clec4e	Ctsw
Clec5a	Cx3cr1
Cnih4	Cxx1a
Col4a1	Cyp27a1
Col4a2	D930015E06Rik
Cox17	Dazap2
Cp	Dbi
Creld2	Dennd6a
Crem	Dmpk
Csf2ra	Dock10
Csf3	Dtx1
Csrnp1	Eef1b2
Cstb	Eif1
Ctps	Eif3k
Ctsc	Epb4.1
Cxcl1	Ephx1
Cxcl10	Erich5
Cxcl16	Faim3
Cxcl2	Fam213a
Cxcl9	Fam49a
Cxcr2	Fam78a
Cycs	Fcgrt
Cyth3	Fchsd2
Dab2	Fcna
Dgat1	Fcrla
Dgat2	Fgd2
Dhx58	Fgfr1op2
Dram1	Foxo1
Dtx3l	Ftl1
Dusp1	Fuca1
Dusp16	Fxyd6
Ear3	Gal3st2
Ear4	Gdf10
Ebi3	Gga2
Edn1	Gigyf1
Ehd1	Gimap5
Eif2ak2	Glg1
Emp1	Gltscr2
Enc1	Gm10029
Errfi1	Gm10125
F10	Gm11425
Fam129b	Gm14407
Fam26f	Gm2174
Fas	Gm2a
Fblim1	Gm4671
Fcer1g	Gm6548
Fcgr3	Gm7609
Fcgr4	Gprasp1
Flot1	Grap
Fmnl2	Grcc10
Fos	Gripap1
Fosl2	H2-Aa
Fpr2	H2-Ke6
Furin	Haao
G0s2	Hap1
Gadd45b	Hbb-bt
Gadd45g	Hcfc1
Galk1	Hdac7
Gapdh	Hhex
Gas7	Hmgcs2
Gbp2	Hmha1
Gbp3	Hpgd
Gbp5	Hs3st3a1
Gbp7	Hsd3b2
Gcnt2	Htra3
Gde1	Ift140
Gja4	Igf1
Glipr2	Igfbp3
Glrx	Igfbp5
Gm4951	Il16
Gm5483	Il6ra
Gm6316	Inpp5f
Gng12	Irf2bpl
Gorasp2	Isca1
Gosr2	Itgad
Gp49a	Itgb5
Gpnmb	Itgb7
Gpr31b	Itm2b
Gpr35	Itpr3
Gpr84	Kansl2
Gpx3	Kctd2
Gsdmd	Klf2
Gyk	Klk8
H2-Q8	Kmt2c
H2-T10	Kmt2e
Hat1	Lat2
Hcar2	Lbh
Hdc	Lck
Hif1a	Limch1
Hilpda	Lipa
Hk3	LOC100041504
Hp	Lrmp
Hsd11b1	Lsm14b
Hsd3b7	Ltb
Icam1	Luc7l3
Ier3	Ly6d
Ifi35	Map3k1
Ifit2	Map4k1
Ifitm1	Mapk11
Ifitm2	March2
Ifitm3	Mast3
Ifng	Matr3
Ifnlr1	Mcl1
Igtp	Mef2c
Ikbke	Mif4gd
Il10	Mrc1
Il12a	Msc
Il1a	Mum1
Il1b	Myl12b
Il1r2	Naca
Il1rn	Nedd9
Il27	Nrep
Il33	Nrm
Inhba	Nt5c
Insl6	Nudt16l1
Irak2	Pabpc1
Irak3	Pcdh12
Irf1	Phxr4
Irf7	Pip4k2a
Irgm1	Pld4
Irgm2	Plekhg2
Itga5	Pold1
Jun	Polr2a
Junb	Pou2f2
Lacc1	Pramel4
Lamp2	Prelp
Lcn2	Prkd2
Ldha	Prpf6
Lgals3bp	Ptp4a2
Lgmn	Ptp4a3
Litaf	Ptpn18
Lox	Ptpre
Lrrc8d	Pygb
Ly6a	Rab11fip4
Ly6c1	Ralgps2
Lyz2	Rasa3
Man2a1	Rasgrp3
Map3k8	Rassf3
Mapk1ip1l	Rassf5
Mapk6	Rcsd1
Mapkapk2	Rdm1
Mb21d1	Rgs10
Mcemp1	Rhbdl2
Mefv	Rhof
Mettl9	Rims3
Mfsd7a	Rin3
Mgst1	Rn18s
Mif	Rnase6
Milr1	Rogdi
Mlkl	Rpl12
Mmp13	Rpl18a
Mmp14	Rpl23
Mmp3	Rpl26
Mocos	Rpl29
Mrgpra2b	Rpl32
Mrgpra7	Rpl39
Ms4a6d	Rps10
Msrb1	Rps12l2
Mt1	Rps3a1
Mt2	Sash3
Mvp	Sbk1
Mxd1	Scd1
Myd88	Sdpr
Ndel1	Sema5a
Ndrg1	Setd1b
Ndufab1	Sgip1
Neu1	Siglecg
Nfkbia	Siglech
Nfkbiz	Sipa1
Ngp	Slamf6
Nos2	Slc25a37
Ntng2	Slc25a39
Nus1	Slc40a1
Oas1g	Slc46a3
Oas2	Slc4a1
Oas3	Slc50a1
Oasl1	Slc9a3r2
Oasl2	Slco2b1
Orm1	Smim14
Osm	Snn
Ostc	Snx29
P4hb	Snx8
Parp14	Spon2
Pcgf5	Sptssa
Pdpn	Srpk3
Pex11a	Srsf5
Pfkp	St6gal1
Pgam1	St6galnac3
Phf11d	Stab2
Phlda1	Tcf21
Pik3ap1	Tcf25
Pik3r6	Tcof1
Pira11	Timp2
Pira4	Tk2
Pkm	Tmem109
Pla1a	Tmem176b
Plagl2	Tmem204
Plaur	Tmem86a
Plin2	Tnfrsf13b
Plk3	Tnfrsf13c
Plod3	Tpcn1
Plscr1	Trf
Ppa1	Trib2
Ppp1r3b	Trim39
Ppp2cb	Tshz1
Prdx5	Txnip
Prok2	Ube2o
Psma5	Usp10
Psma7	Vav2
Psmb1	Wasf2
Psmb2	Wipf1
Psmb7	Xkrx
Psme1	Ywhab
Ptges	Ywhaz
Rab15	Zbtb20
Ramp3	Zc3h12d
Rbms1	Zer1
Rdh12	Zfp263
Retnlg	Zfp318
Rgs1	Zfp36l1
Rgs16	Zxda
Rhoc
Rhou
Rnf213
Rps27a
Rrbp1
Rtn3
S100a8
Saa3
Samhd1
Samsn1
Sap30
Scamp1
Sct
Sdc4
Sdcbp
Sdf2l1
Selp
Sema4a
Sepn1
Serpina3b
Serpina3f
Serpina3g
Serpina3n
Serping1
Serpinh1
Sgms2
Sh3pxd2b
Slamf9
Slc11a1
Slc15a3
Slc25a20
Slc2a1
Slc2a6
Slc31a1
Slc7a11
Slc7a2
Slco3a1
Slfn1
Smpdl3b
Snrpd1
Snx10
Snx18
Socs3
Sod2
Sparc
Spcs3
Sphk1
Spp1
Sppl2a
Srm
Stat1
Stat3
Stfa1
Stfa2
Tbc1d2
Tdrd7
Tgm2
Thbs1
Timp1
Timp3
Tinagl1
Tlr2
Tlr6
Tmbim4
Tmed7
Tmem2
Tmem248
Tmem33
Tmem38b
Tnf
Tnfaip2
Tnfaip3
Tnfrsf12a
Tnfrsf21
Tnip1
Tpi1
Trem1
Trem3
Trex1
Trim30d
Tspo
Ttc39b
Ubd
Uck2
Upp1
Usp18
Vdr
Vim
Vmp1
Wars
Wdr92
Wfdc17
Xdh
Zfp36

## Sheet: Gp 3 72h vs Gp 3 6h
Upregulated	Downregulated
4930599N23Rik	2310022B05Rik
AA467197	2510042H12Rik
Adamts4	Abcc3
Adora2b	Acss1
Akap12	Add3
Aldoa	Ahnak
Angpt2	Ahsp
Angptl4	Alas2
Antxr2	Ank
Arg1	Atp2a3
Arg2	Bnip3l
Arrdc4	Cbfa2t3
Ass1	Cd209b
Avpr1a	Cdc25b
Batf	Ckb
Batf2	Clec4g
Bcl3	Crip2
Bhlhe40	Cx3cr1
Bst2	Dbp
Car13	Dmpk
Casp4	E2f2
Ccdc86	Epb4.1
Ccl11	Fam78a
Ccl2	Fcgrt
Ccl3	Fcna
Ccl4	Gdf10
Ccl7	Glo1
Ccrl2	Gucy1a3
Cd14	Hbb-bs
Cd274	Hebp1
Cd69	Ift140
Cd80	Igfbp4
Cdc42ep2	Igfbp5
Cdkn1a	Itgad
Cebpb	Limch1
Cfb	March2
Ch25h	Mrc1
Clec4d	Nrm
Clec4e	Pcdh12
Col4a1	Pisd-ps1
Col4a2	Prelp
Cp	Ptp4a3
Creld2	Rbm38
Crem	Reln
Csrnp1	Rims3
Cstb	Rnf10
Ctgf	Slc25a37
Cxcl1	Slc40a1
Cxcl10	Slc46a3
Cxcl16	Slc48a1
Cxcl2	Slc4a1
Cxcl9	Slco2b1
Daxx	Spon2
Ddx3y	Srsf5
Dram1	St5
Dtx3l	St6galnac3
Dusp1	Stab2
Dusp16	Tbcel
Ebi3	Tcf21
Edn1	Timp2
Egr1	Tmc6
Ehd1	Trf
Eif2ak2	Ube2o
Emp1	Xist
Enc1	Ypel3
Errfi1
Ets2
F10
Fam129b
Fam26f
Fas
Fcer1g
Fcgr4
Fkbp1a
Fos
Fosl2
Fpr2
Furin
G0s2
Gadd45b
Gas7
Gbp2
Gbp3
Gbp5
Gbp7
Gja4
Glipr2
Glrx
Gm4951
Gm5483
Gng12
Gpnmb
Gpr171
Gpr35
Gpr84
Gvin1
Hcar2
Hdc
Hilpda
Hspb8
Icam1
Ier3
Ifi47
Ifitm1
Ifitm2
Ifitm3
Ifng
Igtp
Ikbke
Il10
Il12a
Il1a
Il1b
Il1r2
Il1rn
Il33
Insl6
Irak2
Irak3
Irf1
Irf7
Irgm1
Irgm2
Itga5
Junb
Lacc1
Litaf
Lox
Ly6a
Ly6c1
Maged1
Man2a1
Mapkapk2
Marcksl1
Mefv
Mfsd7a
Mif
Mlkl
Mmp13
Mmp14
Mmp3
Mrgpra2b
Mrgpra7
Ms4a6d
Msrb1
Mt1
Mvp
Mxd1
Myd88
Ndrg1
Nfkbia
Nfkbiz
Nos2
Ntng2
Nus1
Oas1g
Oas2
Oasl1
Oasl2
Osm
Pdgfa
Pdpn
Per1
Pex11a
Pfkl
Phf11d
Phlda1
Pla1a
Plaur
Plin2
Plk3
Plod3
Por
Ppa1
Prdx5
Psmb1
Psmb10
Psmb9
Psme1
Ptges
Rab32
Ramp3
Rgs16
Rhoc
Rrbp1
Saa3
Samhd1
Samsn1
Schip1
Sct
Sdc4
Sema3f
Serpina3b
Serpina3f
Serpina3g
Serpina3n
Serpinh1
Sh3pxd2b
Slamf9
Slc11a1
Slc15a3
Slc2a1
Slc2a6
Slc7a11
Slc7a2
Slco3a1
Slfn1
Smpdl3b
Snx10
Snx20
Socs3
Sod2
Sp140
Spp1
Tap2
Tgm2
Thbs1
Timp1
Timp3
Tlr2
Tlr6
Tmem2
Tnf
Tnfaip2
Tnfaip3
Tnfrsf12a
Tnip1
Tpi1
Traf1
Trafd1
Trem1
Trex1
Trim30d
Tubb6
Ubd
Upp1
Usp18
Vdr
Wars
Wdr92
Wfdc17
Xdh
Zfp36
