# Supplementary material for: Transcriptome and proteome analysis of Salmonella enterica serovar Typhimurium systemic infection of wild type and immune-deficient mice
Source: PLoS One. 2017 Aug 10;12(8):e0181365. doi: 10.1371/journal.pone.0181365 (PMC5552096; doi:10.1371/journal.pone.0181365)
Supplement: S19 Table — (XLSX) [file pone.0181365.s019.xlsx]

## Sheet: Sheet1
		Number of mice
	Mouse strain	In vivo grown input for Group 2	Viable counts (CFU)	Mice for extracting prokaryotic RNA (RNAseq samples)	Mice for extracting prokaryotic protein (MS samples)	Mice for extracting eukaryotic RNA (microarray samples)
Uninfected control mice for eukaryotic RNA	C57BL/6	N/A	N/A	N/A	N/A	3
Uninfected control mice for eukaryotic RNA	gp91-/-phox	N/A	N/A	N/A	N/A	3
In vivo grown input for Group 2	C57BL/6	3	N/A	N/A	N/A	N/A
Group 1	C57BL/6	N/A	4 time points (6, 24, 48, 72h), 4 mice per time point = 16 mice	30	12	3
Group 2	C57BL/6	N/A	3 time points (6, 24, 48h), 4 mice per time point = 12 mice	30	12	3
Group 3	gp91-/-phox	N/A	3 time points (6, 24, 48h), 4 mice per time point = 12 mice	30	12	3
